# Supplementary material for: Translatome profiling in fatal familial insomnia implicates TOR signaling in somatostatin neurons
Source: Life Sci Alliance. 2022 Oct 3;5(11):e202201530. doi: 10.26508/lsa.202201530 (PMC9531780; doi:10.26508/lsa.202201530)
Supplement: Supplementary file 1 [file LSA-2022-01530_TableS1.xlsx]

## Sheet: Sheet 1 - prionsamples_meta
	Sample ID	Sample Set	Group	Cell type	Fraction	Region	Gender	Age (weeks)	RNA yield (microgram)	seq_run	Mapped reads (Million)	Percent rRNA reads	Percent Unique mapped Star	Aligned Reads Star (Million)
1	BI54.D	CJD_GadCb_IP	CJD	Gad2	IP	Cerebellum	M	38	0.4	1	68.3	1.57	92.3	29.7
2	BI58.D	CJD_GadCb_IP	CJD	Gad2	IP	Cerebellum	M	38	0.3	1	86.5	4.67	89.2	35.2
3	BI59.D	CJD_GadCb_IP	CJD	Gad2	IP	Cerebellum	F	38	0.3	1	55.4	2.33	92.8	24.4
4	BI55.D	CJD_GadCb_IP	CJD	Gad2	IP	Cerebellum	M	38	0.4	1	81.7	1.92	92.2	34.4
5	BI56.D	CJD_GadCb_IP	CJD	Gad2	IP	Cerebellum	M	38	0.4	1	84.7	2.27	92.6	36.5
6	BI57.D	CJD_GadCb_IP	CJD	Gad2	IP	Cerebellum	M	38	0.6	1	85.1	3.1	91.5	37.3
7	BI58.E	CJD_GadCb_total	CJD	Gad2	total	Cerebellum	M	38	0.4	1	115.4	2.91	91.3	48.7
8	BI54.E	CJD_GadCb_total	CJD	Gad2	total	Cerebellum	M	38	1.0	1	61.5	2.42	86.2	24.4
9	BI56.E	CJD_GadCb_total	CJD	Gad2	total	Cerebellum	M	38	0.9	1	78.6	1.74	90.2	31.7
10	BI57.E	CJD_GadCb_total	CJD	Gad2	total	Cerebellum	M	38	0.6	1	69.7	3.52	87.8	27.7
11	BI55.A	CJD_GadCer_IP	CJD	Gad2	IP	Cerebrum	M	38	0.3	1	115.7	1.22	93.2	49.5
12	BI56.A	CJD_GadCer_IP	CJD	Gad2	IP	Cerebrum	M	38	0.4	1	96.8	1.18	92.2	41.7
13	BI57.A	CJD_GadCer_IP	CJD	Gad2	IP	Cerebrum	M	38	0.3	1	65.4	2.03	91.8	28.7
14	BI58.A	CJD_GadCer_IP	CJD	Gad2	IP	Cerebrum	M	38	0.2	1	81.5	5.44	88	33.9
15	BI59.A	CJD_GadCer_IP	CJD	Gad2	IP	Cerebrum	F	38	0.6	1	80.2	4.45	90.8	33.6
16	BI59.B	CJD_GadCer_total	CJD	Gad2	total	Cerebrum	F	38	3.6	1	94.5	3.71	86.1	37.2
17	BI55.B	CJD_GadCer_total	CJD	Gad2	total	Cerebrum	M	38	4.5	1	112.9	1.61	88.8	46.2
18	BI56.B	CJD_GadCer_total	CJD	Gad2	total	Cerebrum	M	38	3.4	1	94.2	1.82	91.3	38.8
19	BJ779.A	CJD_PV_IP	CJD	PV	IP	Cerebrum	F	42	0.13	1	90.3	1.56	92.4	40.2
20	BJ824.A	CJD_PV_IP	CJD	PV	IP	Cerebrum	M	39	0.08	1	104.8	2.09	93.1	46.4
21	BJ825.A	CJD_PV_IP	CJD	PV	IP	Cerebrum	M	39	0.07	1	131.2	1.23	93.3	56.4
22	BJ826.A	CJD_PV_IP	CJD	PV	IP	Cerebrum	F	39	0.06	1	84.9	1.65	90.6	37.8
23	BJ827.A	CJD_PV_IP	CJD	PV	IP	Cerebrum	F	39	0.07	1	125.1	1.11	93.5	54.8
24	BJ828.A	CJD_PV_IP	CJD	PV	IP	Cerebrum	F	39	0.72	1	108.7	3.45	90.3	45.9
25	BJ829.A	CJD_PV_IP	CJD	PV	IP	Cerebrum	F	39	0.4	1	85.5	5.96	84.7	31.8
26	BJ824.B	CJD_PV_total	CJD	PV	total	Cerebrum	M	39	1.9	1	71.6	1.31	86.6	28.2
27	BJ827.B	CJD_PV_total	CJD	PV	total	Cerebrum	F	39	3.7	1	89.9	2.03	91.2	37
28	BJ828.B	CJD_PV_total	CJD	PV	total	Cerebrum	F	39	2.7	1	94.6	3.98	87	37.8
29	BL219.A	CJD_SST_IP	CJD	SST	IP	Cerebrum	M	41	0.06	1	95.9	0.7	91.5	42.7
30	BL220.A	CJD_SST_IP	CJD	SST	IP	Cerebrum	M	41	0.07	1	80.2	1.16	94.2	35.4
31	BL221.A	CJD_SST_IP	CJD	SST	IP	Cerebrum	F	41	0.1	1	106	1.05	94.4	46.9
32	BL222.A	CJD_SST_IP	CJD	SST	IP	Cerebrum	F	41	0.06	1	94.9	1.2	92.3	42.3
33	BL223.A	CJD_SST_IP	CJD	SST	IP	Cerebrum	F	41	0.13	1	54.9	2.85	89.8	23.3
34	BL220.B	CJD_SST_total	CJD	SST	total	Cerebrum	F	41	3.5	1	112.4	2.35	86.7	43.5
35	BL221.B	CJD_SST_total	CJD	SST	total	Cerebrum	F	41	3.7	1	127	2.15	90.3	51.2
36	BL222.B	CJD_SST_total	CJD	SST	total	Cerebrum	F	41	2.8	1	105.3	2.78	86.9	41.3
37	BK114.D	CJD_VglutCb_IP	CJD	vGlut2	IP	Cerebellum	M	43	0.5	1	82	1.62	92.8	36
38	BK115.D	CJD_VglutCb_IP	CJD	vGlut2	IP	Cerebellum	M	43	0.6	1	104.3	1.36	93.5	45.1
39	BK116.D	CJD_VglutCb_IP	CJD	vGlut2	IP	Cerebellum	M	43	0.3	1	74.8	1.09	94	32.9
40	BK117.D	CJD_VglutCb_IP	CJD	vGlut2	IP	Cerebellum	M	43	0.1	1	82.7	2.02	92.5	36.9
41	BK118.D	CJD_VglutCb_IP	CJD	vGlut2	IP	Cerebellum	F	43	0.8	1	71	2.92	92.5	31
42	BK119.D	CJD_VglutCb_IP	CJD	vGlut2	IP	Cerebellum	F	43	0.7	1	78.8	3.14	90.8	34.1
43	BK116.E	CJD_VglutCb_total	CJD	vGlut2	total	Cerebellum	M	43	0.6	1	100.8	3.22	89	41.1
44	BK117.E	CJD_VglutCb_total	CJD	vGlut2	total	Cerebellum	M	43	2.2	1	95.9	2.99	86	37.3
45	BK118.E	CJD_VglutCb_total	CJD	vGlut2	total	Cerebellum	F	43	2.4	1	95.5	1.58	90.8	39
46	BK119.E	CJD_VglutCb_total	CJD	vGlut2	total	Cerebellum	F	43	0.8	1	76.5	3.31	89.6	31.6
47	BK114.A	CJD_VglutCer_IP	CJD	vGlut2	IP	Cerebrum	M	43	0.9	1	113.4	2.17	92.8	49.5
48	BK115.A	CJD_VglutCer_IP	CJD	vGlut2	IP	Cerebrum	M	43	0.8	1	118.8	1.39	93.4	51.3
49	BK116.A	CJD_VglutCer_IP	CJD	vGlut2	IP	Cerebrum	F	43	1.1	1	106.9	1.51	92.8	45
50	BK117.A	CJD_VglutCer_IP	CJD	vGlut2	IP	Cerebrum	F	43	1.1	1	93.3	2.17	91.5	40.9
51	BK118.A	CJD_VglutCer_IP	CJD	vGlut2	IP	Cerebrum	F	43	0.8	1	71.2	1.88	93.5	30.9
52	BK119.A	CJD_VglutCer_IP	CJD	vGlut2	IP	Cerebrum	F	43	0.7	2	263.5	1.55	92.8	116.9
53	BK116.B	CJD_VglutCer_total	CJD	vGlut2	total	Cerebrum	F	43	3.7	1	72.7	1.91	88.3	29.1
54	BK117.B	CJD_VglutCer_total	CJD	vGlut2	total	Cerebrum	F	43	3.7	1	104.4	3.21	91.2	43
55	BK118.B	CJD_VglutCer_total	CJD	vGlut2	total	Cerebrum	F	43	2.3	1	75.7	3.08	86.8	30.7
56	D192.D	Control_GadCb_IP	Control	Gad2	IP	Cerebellum	M	45	0.5	1	108.9	2.19	91.9	48.2
57	D180.D	Control_GadCb_IP	Control	Gad2	IP	Cerebellum	M	46	0.2	1	61.2	4.71	90	26.4
58	D189.D	Control_GadCb_IP	Control	Gad2	IP	Cerebellum	M	45	0.6	1	64.9	1.39	92.6	28.7
59	D190.D	Control_GadCb_IP	Control	Gad2	IP	Cerebellum	M	45	0.5	1	106.7	1.74	92.6	45.5
60	D191.D	Control_GadCb_IP	Control	Gad2	IP	Cerebellum	M	45	0.4	1	117	1.13	93.8	50.9
104	D179.D	Control_GadCb_IP	Control	Gad2	IP	Cerebellum	M	46	0.2	1	86.9	2.24	91.2	37.2
61	D191.E	Control_GadCb_total	Control	Gad2	total	Cerebellum	M	45	0.6	1	96.1	2.66	89	38
62	D192.E	Control_GadCb_total	Control	Gad2	total	Cerebellum	M	45	0.7	1	85.6	4.49	86.6	34.5
63	D180.E	Control_GadCb_total	Control	Gad2	total	Cerebellum	M	46	0.3	1	88.3	4.04	90.6	36.9
64	D190.E	Control_GadCb_total	Control	Gad2	total	Cerebellum	M	45	0.4	1	77.6	1.15	87.2	30.9
65	D179.A	Control_GadCer_IP	Control	Gad2	IP	Cerebrum	M	46	0.5	1	256.3	2.64	92.3	112.1
66	D180.A	Control_GadCer_IP	Control	Gad2	IP	Cerebrum	M	46	0.3	1	63.5	2.6	88.2	26.2
67	D189.A	Control_GadCer_IP	Control	Gad2	IP	Cerebrum	M	45	0.3	1	69.4	1.53	92.4	30.5
68	D190.A	Control_GadCer_IP	Control	Gad2	IP	Cerebrum	M	45	0.3	1	88	1.19	93.5	37.9
69	D191.A	Control_GadCer_IP	Control	Gad2	IP	Cerebrum	M	45	0.3	1	77.9	1.3	91.9	33.4
70	D192.A	Control_GadCer_IP	Control	Gad2	IP	Cerebrum	M	45	0.1	1	72.2	2.47	91	31.7
71	D179.B	Control_GadCer_total	Control	Gad2	total	Cerebrum	M	46	3.9	1	115.3	3.34	89.9	47.4
72	D189.B	Control_GadCer_total	Control	Gad2	total	Cerebrum	M	45	2.3	1	73.7	2.18	87.8	29.9
73	D190.B	Control_GadCer_total	Control	Gad2	total	Cerebrum	M	45	2.9	1	93.8	2.12	90.3	37.7
74	E184.A	Control_PV_IP	Control	PV	IP	Cerebrum	M	48	0.1	1	93.2	5.86	89.4	39.2
75	E185.A	Control_PV_IP	Control	PV	IP	Cerebrum	M	48	0.09	1	87.7	0.93	93.3	39.6
76	E212.A	Control_PV_IP	Control	PV	IP	Cerebrum	M	40	0.09	1	84.1	1.7	92.9	37.2
77	E213.A	Control_PV_IP	Control	PV	IP	Cerebrum	M	40	0.09	1	65.1	1.14	91.9	29
78	E215.A	Control_PV_IP	Control	PV	IP	Cerebrum	M	40	0.18	1	95.1	1.02	93.8	41.6
79	E216.A	Control_PV_IP	Control	PV	IP	Cerebrum	M	40	0.14	1	97	2.41	92	42.5
80	E213.B	Control_PV_total	Control	PV	total	Cerebrum	M	40	2.4	1	120.2	1.16	84.9	47.2
81	E215.B	Control_PV_total	Control	PV	total	Cerebrum	M	40	2.8	1	78	1.74	90.8	32.2
82	E216.B	Control_PV_total	Control	PV	total	Cerebrum	M	40	4.4	1	91.7	2.71	89	37.3
105	E184.B	Control_PV_total	Control	PV	total	Cerebrum	M	48	3.1	1	145.9	4.59	88.6	58.4
83	Z56.A	Control_SST_IP	Control	SST	IP	Cerebrum	F	40	0.1	1	96	0.85	94.8	42.8
84	Z57.A	Control_SST_IP	Control	SST	IP	Cerebrum	F	40	0.04	1	71.1	0.78	92.6	32
85	Z59.A	Control_SST_IP	Control	SST	IP	Cerebrum	F	40	0.05	1	69.2	1.59	93	30.6
86	Z58.B	Control_SST_total	Control	SST	total	Cerebrum	F	40	2.0	1	84.3	2.73	89.3	34.5
87	Z59.B	Control_SST_total	Control	SST	total	Cerebrum	F	40	2.4	1	97.4	3.02	89.1	40.1
88	U67.D	Control_VglutCb_IP	Control	vGlut2	IP	Cerebellum	F	40	0.6	1	106.1	1.76	93.9	47.2
89	U68.D	Control_VglutCb_IP	Control	vGlut2	IP	Cerebellum	F	40	1.3	1	99.1	1.48	93.6	42.8
90	U69.D	Control_VglutCb_IP	Control	vGlut2	IP	Cerebellum	F	40	0.7	1	85.6	1.29	92.9	37.1
91	U82.D	Control_VglutCb_IP	Control	vGlut2	IP	Cerebellum	M	38	0.9	1	87.3	2.2	92.7	38.7
92	U83.D	Control_VglutCb_IP	Control	vGlut2	IP	Cerebellum	M	39	0.6	1	59.1	3.45	92.5	25.9
93	U83.E	Control_VglutCb_total	Control	vGlut2	total	Cerebellum	M	39	0.7	1	62.8	1.5	86.1	24
94	U84.E	Control_VglutCb_total	Control	vGlut2	total	Cerebellum	M	39	1.5	1	104.9	1.76	90.2	42.1
95	U67.A	Control_VglutCer_IP	Control	vGlut2	IP	Cerebrum	F	40	1.0	1	73.8	2.37	91.3	32.1
96	U68.A	Control_VglutCer_IP	Control	vGlut2	IP	Cerebrum	F	40	0.8	1	104.7	1.55	93.1	44.7
97	U69.A	Control_VglutCer_IP	Control	vGlut2	IP	Cerebrum	F	40	0.8	1	77.6	1.87	92.5	33.1
98	U82.A	Control_VglutCer_IP	Control	vGlut2	IP	Cerebrum	M	38	0.9	1	95.9	2.8	91	41.7
99	U83.A	Control_VglutCer_IP	Control	vGlut2	IP	Cerebrum	M	39	0.7	1	66.3	3.17	92	28.7
100	U84.A	Control_VglutCer_IP	Control	vGlut2	IP	Cerebrum	M	39	1.4	2	270.5	2.8	92.4	118.4
101	U68.B	Control_VglutCer_total	Control	vGlut2	total	Cerebrum	F	40	3.2	1	76.2	1.98	87.9	30.5
102	U69.B	Control_VglutCer_total	Control	vGlut2	total	Cerebrum	F	40	2.6	1	86.5	2.31	90.3	34.9
103	U82.B	Control_VglutCer_total	Control	vGlut2	total	Cerebrum	M	38	3.0	1	97.4	3.23	87.7	39
106	Z58.A	exclude	Control	SST	IP	Cerebrum	F	40	0.2	1	69.6	2.25	89.3	28.9
107	BC671.D	exclude	FFI	Gad2	IP	Cerebellum	F	36	0.4	2	102.1	19.79	78.1	39
108	BD629.A	exclude	FFI	PV	IP	Cerebrum	F	40	0.4	1	5.2	22.68	72.3	1.7
109	BE264.E	exclude	FFI	vGlut2	total	Cerebellum	M	39	3.9	1	107.2	3.87	87.9	44.8
110	BE268.A	exclude	FFI	vGlut2	IP	Cerebrum	F	39	1.8	1	240.3	21.29	79.5	89.7
111	BC667.D	FFI_GadCb_IP	FFI	Gad2	IP	Cerebellum	M	36	0.2	1	61.4	0.93	92.1	27.2
112	BC668.D	FFI_GadCb_IP	FFI	Gad2	IP	Cerebellum	F	36	0.2	1	74.1	1.18	93.5	31.9
113	BC670.D	FFI_GadCb_IP	FFI	Gad2	IP	Cerebellum	F	36	0.3	1	80.8	2.92	89.4	35.4
114	BC672.D	FFI_GadCb_IP	FFI	Gad2	IP	Cerebellum	F	36	0.3	1	62.2	3.35	89.3	26
115	BC699.D	FFI_GadCb_IP	FFI	Gad2	IP	Cerebellum	F	36	0.3	1	105.4	2.12	92.9	45.4
116	BC667.E	FFI_GadCb_total	FFI	Gad2	total	Cerebellum	M	36	2.9	1	71.3	1.97	88.2	28.5
117	BC668.E	FFI_GadCb_total	FFI	Gad2	total	Cerebellum	F	36	3.6	1	91.7	1.72	91.5	37.9
118	BC669.E	FFI_GadCb_total	FFI	Gad2	total	Cerebellum	F	36	3.6	1	99.6	2.89	86.8	39.6
119	BC670.E	FFI_GadCb_total	FFI	Gad2	total	Cerebellum	F	36	1.5	1	116.4	2.58	86.4	45.8
120	BC665.A	FFI_GadCer_IP	FFI	Gad2	IP	Cerebrum	M	36	0.5	1	88.4	3.08	89.8	36.7
121	BC666.A	FFI_GadCer_IP	FFI	Gad2	IP	Cerebrum	M	36	0.8	1	84.5	3.32	90.2	34.8
122	BC667.A	FFI_GadCer_IP	FFI	Gad2	IP	Cerebrum	M	36	0.5	1	66	4.32	89.6	27.8
123	BC670.A	FFI_GadCer_IP	FFI	Gad2	IP	Cerebrum	F	36	0.3	1	74.1	2.45	93.1	32.7
124	BC671.A	FFI_GadCer_IP	FFI	Gad2	IP	Cerebrum	F	36	0.1	1	77.6	2.35	85.3	32.7
125	BC672.A	FFI_GadCer_IP	FFI	Gad2	IP	Cerebrum	F	36	0.2	1	73.1	8.58	87.5	30.2
126	BC665.B	FFI_GadCer_total	FFI	Gad2	total	Cerebrum	M	36	3.6	1	135.1	4.71	87.2	53.3
127	BC666.B	FFI_GadCer_total	FFI	Gad2	total	Cerebrum	M	36	2.7	1	63.4	4.68	86.5	24.4
128	BC670.B	FFI_GadCer_total	FFI	Gad2	total	Cerebrum	F	36	2.9	1	98.5	3.39	88.2	40.2
129	BD625.A	FFI_PV_IP	FFI	PV	IP	Cerebrum	M	40	0.17	1	92.9	1.9	92.7	40.7
130	BD626.A	FFI_PV_IP	FFI	PV	IP	Cerebrum	M	40	0.17	1	107.3	0.78	93.8	46.7
131	BD627.A	FFI_PV_IP	FFI	PV	IP	Cerebrum	M	40	0.16	1	86.1	0.78	94.1	37.9
132	BD628.A	FFI_PV_IP	FFI	PV	IP	Cerebrum	F	40	0.34	1	93.1	6.06	87.7	37.9
133	BD633.A	FFI_PV_IP	FFI	PV	IP	Cerebrum	F	40	0.05	1	72.1	1.18	93.4	32.5
134	BD627.B	FFI_PV_total	FFI	PV	total	Cerebrum	M	40	3.2	1	82.9	1.85	91.3	34
135	BD625.B	FFI_PV_total	FFI	PV	total	Cerebrum	M	40	5.5	1	54.7	2.66	84	21.3
136	BD633.B	FFI_PV_total	FFI	PV	total	Cerebrum	F	40	1.7	1	104.7	3	84.1	40.6
137	BF809.A	FFI_SST_IP	FFI	SST	IP	Cerebrum	M	40	0.07	1	81.2	0.8	93.4	36.3
138	BF811.A	FFI_SST_IP	FFI	SST	IP	Cerebrum	M	40	0.05	1	98.2	1.1	94	43.5
139	BF812.A	FFI_SST_IP	FFI	SST	IP	Cerebrum	F	40	0.07	1	83.4	1.78	91.2	37
140	BF813.A	FFI_SST_IP	FFI	SST	IP	Cerebrum	F	40	0.09	1	76.6	1.63	91.4	33.2
141	BF814.A	FFI_SST_IP	FFI	SST	IP	Cerebrum	F	40	0.1	1	99	0.69	92.4	44.3
142	BF846.A	FFI_SST_IP	FFI	SST	IP	Cerebrum	F	36	0.07	1	99.9	1.35	93	42.8
143	BF809.B	FFI_SST_total	FFI	SST	total	Cerebrum	M	40	3.7	1	167	3.66	88.1	66.3
144	BF811.B	FFI_SST_total	FFI	SST	total	Cerebrum	M	40	2.5	1	76.9	3.09	87.7	30.6
145	BF810.B	FFI_SST_total	FFI	SST	total	Cerebrum	M	40	1.9	2	97.9	1.42	90.9	39.8
146	BE264.D	FFI_VglutCb_IP	FFI	vGlut2	IP	Cerebellum	M	39	0.5	1	96.7	1.96	93.8	42.3
147	BE265.D	FFI_VglutCb_IP	FFI	vGlut2	IP	Cerebellum	M	39	0.5	1	109.4	1.39	93.2	46.7
148	BE267.D	FFI_VglutCb_IP	FFI	vGlut2	IP	Cerebellum	F	39	1.1	1	97.2	1.63	92.7	42.8
149	BE268.D	FFI_VglutCb_IP	FFI	vGlut2	IP	Cerebellum	F	39	0.4	1	89.2	2.52	93.3	39.3
150	BE265.E	FFI_VglutCb_total	FFI	vGlut2	total	Cerebellum	M	39	1.2	1	63.2	1.57	87.5	24.8
151	BE267.E	FFI_VglutCb_total	FFI	vGlut2	total	Cerebellum	F	39	3.3	1	190.2	7.24	87.2	75
152	BE268.E	FFI_VglutCb_total	FFI	vGlut2	total	Cerebellum	F	39	1.8	1	71.8	3.34	83.3	27.3
153	BE264.A	FFI_VglutCer_IP	FFI	vGlut2	IP	Cerebrum	M	39	1.3	1	101.9	1.51	92.3	42.5
154	BE265.A	FFI_VglutCer_IP	FFI	vGlut2	IP	Cerebrum	M	39	0.8	1	80	2.66	91.2	34.9
155	BE266.A	FFI_VglutCer_IP	FFI	vGlut2	IP	Cerebrum	M	39	0.5	1	113.5	1.44	93.2	50.4
156	BE267.A	FFI_VglutCer_IP	FFI	vGlut2	IP	Cerebrum	F	39	1.0	1	120.7	2.14	92.4	50.9
157	BE264.B	FFI_VglutCer_total	FFI	vGlut2	total	Cerebrum	M	39	3.5	1	74.8	3.64	87.5	29.4
158	BE267.B	FFI_VglutCer_total	FFI	vGlut2	total	Cerebrum	F	39	4.3	1	103.7	3.1	88.1	41
159	BE268.B	FFI_VglutCer_total	FFI	vGlut2	total	Cerebrum	F	39	4.4	1	123	2.61	90	48.8
	Table S1. Metadata for RNAseq samples. Table with additional data for RNAseq samples.
