# Supplementary material for: Translatome profiling in fatal familial insomnia implicates TOR signaling in somatostatin neurons
Source: Life Sci Alliance. 2022 Oct 3;5(11):e202201530. doi: 10.26508/lsa.202201530 (PMC9531780; doi:10.26508/lsa.202201530)
Supplement: Supplementary file 2 [file LSA-2022-01530_TableS2.xlsx]

## Sheet: CJD_Gad2_Cb
Ensembl	Disease	Celltype	symbol	Entrez	pvalue	padj	sLFC	BI54.D	BI58.D	BI59.D	BI55.D	BI56.D	BI57.D	D192.D	D180.D	D189.D	D190.D	D191.D	D179.D	BC667.D	BC668.D	BC670.D	BC672.D	BC699.D
ENSMUSG00000002985	CJD	GadCb	Apoe	11816	0.000196315	0.0477272	-0.268395	400.615	456.484	394.405	455.929	455.997	511.8	641.62	497.685	807.791	811.696	527.983	798.63	474.248	315.713	512.052	499.914	457.156
ENSMUSG00000005125	CJD	GadCb	Ndrg1	17988	6.7948e-05	0.0287523	-0.357655	15.4391	25.5217	16.3254	20.3963	14.4655	18.3298	33.4475	23.093	33.5606	30.8106	25.9481	32.2259	25.1184	14.3009	19.9029	31.8636	12.3315
ENSMUSG00000009112	CJD	GadCb	Bcl2l13	94044	0.000200481	0.0477272	-0.164779	8.69713	9.14185	9.41387	8.79923	8.27077	9.75563	13.8522	12.2405	12.2639	11.7208	10.561	10.3916	11.5815	9.43138	9.55789	9.38848	7.97229
ENSMUSG00000015202	CJD	GadCb	Cnksr3	215748	9.34162e-05	0.0341302	-0.357013	6.27115	6.52453	5.61195	8.6861	6.92224	8.74794	12.1022	8.94718	16.4452	12.5431	8.84233	13.8734	12.9801	5.35895	9.37866	11.1657	6.95591
ENSMUSG00000015217	CJD	GadCb	Hmgb3	15354	2.07704e-09	9.66791e-06	0.532892	28.5952	33.8097	30.7447	28.3676	30.0791	30.3939	24.6303	23.004	19.5805	20.6953	18.4833	23.0313	22.4911	17.2492	24.7581	20.7065	16.8471
ENSMUSG00000018446	CJD	GadCb	C1qbp	12261	4.02471e-05	0.0187337	0.200433	233.092	207.768	219.888	202.28	188.877	223.415	191.26	170.903	200.713	190.156	185.439	165.734	211.17	184.199	203.985	153.846	200.348
ENSMUSG00000018634	CJD	GadCb	Crhr1	12921	2.61708e-05	0.0130517	-0.443638	7.35671	7.26464	7.11943	11.1647	9.63867	8.41334	13.2653	11.9455	18.317	18.3279	11.9398	14.4094	13.6258	10.161	9.52211	9.66557	7.53431
ENSMUSG00000020717	CJD	GadCb	Pecam1	18613	0.000121595	0.0361265	-0.358484	0.946071	0.960814	1.29908	1.19107	0.914015	0.925216	1.63027	1.50017	1.92566	1.82457	1.92172	2.87123	1.17282	0.390642	1.31274	0.776733	0.723339
ENSMUSG00000021250	CJD	GadCb	Fos	14281	8.89693e-09	2.48473e-05	1.70278	10.7604	25.3477	14.449	10.5691	12.2243	14.7135	5.43684	1.77472	7.07278	3.94633	5.845	1.85243	14.3253	15.6981	33.0097	10.0615	1.55928
ENSMUSG00000022332	CJD	GadCb	Khdrbs3	13992	0.000104082	0.0346047	0.302205	48.2103	41.7317	41.6775	47.6784	51.0822	52.6933	37.175	38.4935	33.4256	43.8151	33.3456	27.7231	44.2284	58.798	46.0409	34.5231	46.8465
ENSMUSG00000023034	CJD	GadCb	Nr4a1	15370	2.16969e-08	5.04959e-05	1.28385	4.69287	9.15979	4.71125	7.98974	6.22647	8.18944	3.02633	1.46285	4.21634	3.51774	2.20274	2.12762	4.47575	6.67521	9.38685	4.58447	1.18885
ENSMUSG00000024026	CJD	GadCb	Glo1	109801	1.46886e-29	2.05112e-25	1.4884	537.231	524.043	386.853	556.327	353.748	613.186	210.82	177.387	196.149	171.98	184.805	176.61	190.099	178.496	403.356	152.901	170.552
ENSMUSG00000024042	CJD	GadCb	Sik1	17691	2.21404e-05	0.0116949	0.392591	3.72431	4.28825	4.77817	3.32537	4.31979	4.27687	3.60646	2.63761	3.54232	3.23494	2.51912	2.57519	4.41852	4.42211	2.91253	3.72636	2.18368
ENSMUSG00000024190	CJD	GadCb	Dusp1	19252	2.38312e-06	0.00277316	0.583952	18.4489	22.024	25.7778	20.1638	18.632	24.625	16.3082	10.0685	16.6713	12.6031	16.0892	9.15525	27.3249	13.323	39.8516	11.0601	8.43734
ENSMUSG00000024978	CJD	GadCb	Gpam	14732	0.000112395	0.0348773	-0.254766	5.01744	5.52536	5.72425	5.80607	5.21061	5.96145	9.08062	7.92563	9.45926	8.25437	5.44068	7.90471	9.3228	3.75957	5.92378	7.32198	3.05597
ENSMUSG00000024998	CJD	GadCb	Plce1	74055	0.000211908	0.0477272	-0.257455	1.83044	1.94931	1.6342	2.53865	1.97257	2.00151	3.58358	2.55836	3.43841	2.73397	2.62795	3.0792	3.86654	1.59239	1.73267	2.9199	1.01896
ENSMUSG00000025780	CJD	GadCb	Itih5	209378	2.26126e-05	0.0116949	-0.450004	2.224	1.61743	1.67527	1.93407	1.55849	2.02889	3.844	3.17349	3.92508	3.236	1.89909	3.05063	3.54485	1.49384	2.44861	1.33137	0.824053
ENSMUSG00000025889	CJD	GadCb	Snca	20617	8.67469e-06	0.0065718	0.421866	26.6389	30.5683	29.0796	22.5859	21.6798	29.6977	21.9202	16.8786	23.5874	16.2578	18.534	20.1748	24.8956	20.6852	27.3501	18.1675	20.1159
ENSMUSG00000026494	CJD	GadCb	Kif26b	269152	0.000188505	0.0470049	-0.273433	2.78645	3.51958	3.1383	3.88587	2.55904	3.02353	4.62824	5.1595	5.92699	5.07561	3.21569	5.00134	5.07081	2.7648	3.18521	4.63097	2.05228
ENSMUSG00000026514	CJD	GadCb	Cnih3	72978	7.62432e-07	0.00106466	0.645452	5.37324	5.93007	5.93529	4.30683	3.72694	4.91941	3.64339	2.76182	2.45485	2.64847	3.37427	3.09341	3.56216	5.85522	5.91136	5.34835	5.99524
ENSMUSG00000026674	CJD	GadCb	Ddr2	18214	4.73968e-06	0.00441232	-0.705807	0.515686	0.235614	0.285483	0.351736	0.31333	0.29982	0.755401	0.760776	0.770793	0.671028	0.543373	0.919676	0.655637	0.184434	0.553853	0.568143	0.274049
ENSMUSG00000027210	CJD	GadCb	Meis2	17536	9.41248e-06	0.0065718	1.13454	4.03091	4.10836	1.96628	0.790268	1.37506	2.51152	1.01061	1.3852	0.619227	0.53882	0.344471	0.301931	0.694386	0.708916	2.84406	10.6777	0.428202
ENSMUSG00000027270	CJD	GadCb	Lamp5	76161	0.00010926	0.034675	0.367251	17.8815	38.6873	5.0258	4.77796	2.51106	19.8406	4.3045	3.71121	3.44556	1.52377	3.23698	2.75806	3.22359	0.986122	15.3573	0.595879	3.25107
ENSMUSG00000028273	CJD	GadCb	Pdlim5	56376	0.000147456	0.0388504	-0.326474	1.78989	1.29876	1.60658	1.33876	1.35157	1.98716	3.14265	2.43355	3.42318	2.25027	1.85701	2.91106	2.09303	0.945523	2.05508	1.71628	1.00768
ENSMUSG00000028496	CJD	GadCb	Mllt3	70122	9.5322e-05	0.0341302	0.297254	8.32822	10.5902	13.4439	10.6225	8.98743	10.7494	9.42508	8.90897	8.79491	8.00559	5.95963	6.83936	7.90431	14.0893	9.13008	13.3158	7.6684
ENSMUSG00000028527	CJD	GadCb	Ak4	11639	6.99784e-06	0.00574811	-0.411058	13.0846	15.617	16.1066	18.1768	14.7061	17.0763	24.9848	23.3803	32.4647	24.0382	17.4961	24.969	29.6833	11.9644	16.8875	20.3177	10.73
ENSMUSG00000030761	CJD	GadCb	Myo7a	17921	1.20594e-07	0.000240568	-1.59394	0.48238	0.944612	0.466445	0.499317	0.496408	0.445243	2.53502	1.66366	3.66784	1.4927	2.39887	0.875139	0.67128	0.138404	0.154064	7.37448	1.96905
ENSMUSG00000031207	CJD	GadCb	Msn	17698	2.02944e-05	0.0116949	-0.4429	5.66603	5.54377	6.9304	5.90074	3.82918	6.34311	11.9613	8.40374	10.1841	11.8051	7.4134	7.61685	10.2324	4.99599	6.58326	10.1997	3.43216
ENSMUSG00000031808	CJD	GadCb	Slc27a1	26457	3.33838e-06	0.00358594	-0.333804	22.2218	27.1031	28.1584	25.0589	26.6874	27.0431	40.9578	32.2461	40.1278	37.2298	31.4399	41.2172	30.7291	30.6766	25.1413	39.0202	22.9215
ENSMUSG00000031980	CJD	GadCb	Agt	11606	3.54341e-05	0.0170621	-0.380373	22.5933	26.5508	22.252	30.4786	25.3982	34.3281	41.9782	32.5467	51.9565	43.1801	41.7313	46.1545	36.9434	17.618	28.4102	34.2239	23.5979
ENSMUSG00000032046	CJD	GadCb	Abhd12	76192	1.65724e-06	0.0021038	0.303873	400.117	357.81	395.91	379.123	398.635	366.436	303.475	306.265	320.485	328.439	332.17	314.073	312.857	334.047	305.45	273.085	342.176
ENSMUSG00000032281	CJD	GadCb	Acsbg1	94180	0.000210943	0.0477272	-0.277966	34.8185	57.8552	38.5723	56.1916	40.8864	45.3916	71.0243	57.9358	77.7695	87.5184	63.606	71.4954	64.1753	38.2912	42.1442	75.5147	36.7941
ENSMUSG00000032313	CJD	GadCb	Tmem266	244886	0.000130777	0.0365234	-0.206778	12.3419	15.9738	16.4021	16.9324	15.3214	16.0767	21.2173	20.329	24.5961	21.276	18.5735	21.4986	22.867	16.9938	14.756	20.5317	15.0557
ENSMUSG00000033450	CJD	GadCb	Tagap	72536	8.26742e-12	5.77231e-08	0.983244	5.71094	4.44191	6.11304	5.3387	4.45331	6.51873	3.20495	3.5085	2.75238	2.1331	2.60419	2.38274	2.62636	2.21176	5.58866	0.553715	2.04177
ENSMUSG00000034177	CJD	GadCb	Rnf43	207742	0.000102943	0.0346047	-0.378371	1.15992	0.888961	1.07297	1.67088	1.02595	1.19214	2.15334	2.40404	2.60621	2.00699	1.46931	3.54917	1.75722	1.40381	1.57961	1.75888	1.53327
ENSMUSG00000034853	CJD	GadCb	Acot11	329910	0.000177148	0.0449763	-0.284236	5.12134	8.94298	6.56284	8.44009	6.77649	7.48644	12.5157	8.99577	13.3153	12.0084	9.56161	11.1835	10.7314	6.67338	8.0659	15.8037	5.81424
ENSMUSG00000036634	CJD	GadCb	Mag	17136	0.000204705	0.0477272	-0.286076	31.9885	52.4822	45.0451	49.2431	40.1773	54.7861	94.2451	58.5463	78.2345	60.4298	57.8655	88.1641	56.9534	33.2723	48.2424	79.516	33.0629
ENSMUSG00000037242	CJD	GadCb	Clic4	29876	0.000142052	0.0381464	-0.296323	13.2055	13.7837	14.3021	11.4369	9.91911	15.2806	25.848	19.9653	24.6612	17.872	13.3688	19.8236	22.1075	7.74213	14.3082	23.5093	8.08631
ENSMUSG00000037362	CJD	GadCb	Ccn3	18133	1.45498e-05	0.0094752	-0.614603	1.25442	1.19856	1.06402	0.635375	0.752921	1.11339	2.40475	1.73203	3.03953	2.41439	1.42785	2.31159	1.94083	0.273483	1.48906	1.24569	0.7547
ENSMUSG00000038024	CJD	GadCb	Dennd4c	329877	7.34524e-05	0.0293338	-0.383486	0.947735	0.832984	1.10777	1.25595	0.712084	1.16286	1.67302	1.73227	2.37137	1.84197	1.18085	1.68885	1.89097	0.833297	1.15066	0.964803	0.546555
ENSMUSG00000038485	CJD	GadCb	Socs7	192157	0.000158829	0.041072	-0.19209	16.7523	20.6314	18.3727	19.293	19.6916	17.7895	25.9756	24.1965	29.3708	25.6339	20.7183	26.8829	25.5966	21.5049	18.0064	24.6672	15.2344
ENSMUSG00000039714	CJD	GadCb	Cplx3	235415	4.48531e-07	0.000695921	0.765048	5.83386	9.30104	6.59563	9.04298	8.12815	6.81806	6.1904	3.92979	4.24766	3.77244	4.02681	2.93053	5.01612	8.62174	6.34422	7.80571	10.0795
ENSMUSG00000040209	CJD	GadCb	Zfp704	170753	0.000222208	0.048483	-0.195851	5.73055	5.3011	6.46818	5.78575	5.55439	5.53984	7.94732	9.191	8.89005	7.93753	5.85769	7.40318	8.33145	6.67685	5.56469	6.16254	4.39264
ENSMUSG00000041075	CJD	GadCb	Fzd7	14369	9.09768e-05	0.0341302	-0.349397	3.75326	4.32227	3.85913	4.36404	4.08489	4.71737	8.57681	5.27854	8.03703	6.9759	4.36439	8.44337	5.68602	2.92449	4.6074	6.16974	2.53228
ENSMUSG00000045136	CJD	GadCb	Tubb2b	73710	2.85588e-07	0.000498494	-0.495902	45.2366	61.27	57.4626	59.273	45.3343	61.219	99.5639	75.3074	103.507	88.3795	67.0545	97.1722	113.358	59.3936	56.1352	92.4878	41.6079
ENSMUSG00000045312	CJD	GadCb	Lhfpl2	218454	9.80515e-05	0.0342298	-0.261771	4.85099	5.2769	4.70585	4.8501	4.06744	5.23505	8.0998	6.53751	8.63447	6.58797	5.661	6.50163	7.24346	2.6029	5.69242	5.13778	3.24786
ENSMUSG00000052031	CJD	GadCb	Tagap1	380608	0.000217436	0.0481948	-0.247032	13.5128	12.2448	9.84113	13.2738	12.638	11.9886	19.3269	16.4631	20.9516	19.2474	18.3177	14.5808	22.6058	19.0728	11.9209	23.0695	18.4752
ENSMUSG00000052374	CJD	GadCb	Actn2	11472	8.94412e-05	0.0341302	0.445368	2.37008	7.99472	1.85493	3.4473	2.52862	2.91379	1.90798	1.20812	1.09508	0.952612	0.254872	0.95406	2.28994	4.70624	2.79216	0	1.73707
ENSMUSG00000052837	CJD	GadCb	Junb	16477	9.0148e-06	0.0065718	0.455464	16.7368	19.2102	17.8221	15.7148	18.2298	18.6182	14.777	10.511	12.0314	13.8108	13.9597	9.3497	16.6407	18.7547	25.3478	15.2007	12.2746
ENSMUSG00000054580	CJD	GadCb	Pla2r1	18779	5.90422e-05	0.0257646	-0.415539	0.048226	0	0.067025	0.020889	0.083505	0.090257	0.113286	0.11462	0.072836	0.810259	0.31393	2.47855	0.07571	0.023083	0.056965	0.086567	0.019409
ENSMUSG00000056214	CJD	GadCb	Pard6g	93737	1.4928e-05	0.0094752	-0.430941	4.27289	3.88471	4.11881	5.45249	4.02719	5.04495	7.85285	7.44732	8.22664	8.00092	4.95026	7.3254	8.14223	4.0637	5.2137	9.80685	3.39196
ENSMUSG00000059336	CJD	GadCb	Slc14a1	108052	0.00012756	0.036352	-0.297071	2.24358	3.01388	2.75286	2.43926	2.32117	3.05992	4.11053	3.29953	4.49853	4.71529	3.63351	4.05892	2.95684	1.66744	3.23229	5.92227	2.03208
ENSMUSG00000059456	CJD	GadCb	Ptk2b	19229	6.39335e-06	0.00557979	0.565864	3.48267	3.9074	3.43489	4.12018	5.28504	4.89624	2.328	2.87057	3.12102	2.66929	2.48145	2.07634	1.31436	3.16254	3.29504	10.9938	2.86285
ENSMUSG00000060012	CJD	GadCb	Kif13b	16554	0.000108252	0.034675	-0.36154	2.11822	2.83335	2.03043	3.58536	2.26546	2.50874	5.11179	3.95351	4.62406	6.34019	2.77351	4.85353	3.96632	2.62608	2.31995	4.56318	1.86339
ENSMUSG00000060961	CJD	GadCb	Slc4a4	54403	0.0001187	0.0360332	-0.291674	16.9672	18.5713	20.023	21.2217	15.0366	21.0325	36.7668	27.7915	35.9269	26.9402	19.3058	25.1399	28.7282	11.705	22.2468	25.8836	10.0918
ENSMUSG00000061232	CJD	GadCb	H2-K1	14972	0.000205088	0.0477272	-0.300948	10.4276	13.168	13.5532	17.7053	15.6119	15.1318	18.5533	23.8099	24.5419	32.8212	19.4306	25.0954	19.9538	12.2533	11.7937	29.2189	14.3915
ENSMUSG00000062202	CJD	GadCb	Btbd9	224671	4.19821e-06	0.00418742	0.468291	28.4424	32.5392	21.8823	33.2352	21.9009	29.5046	20.3511	20.2126	21.3048	19.0268	15.9929	22.2178	24.1612	22.3198	18.1894	18.7727	14.6016
ENSMUSG00000073877	CJD	GadCb	Gm13306	100039863	7.35236e-05	0.0293338	0.395543	19.3899	7.10027	0.242134	27.6491	1.44153	25.2087	0.872129	1.54642	0.69481	3.61828	2.6323	1.4544	2.18112	3.42305	1.60315	4.87111	15.0645
ENSMUSG00000075229	CJD	GadCb	Ccdc58	381045	0.000124423	0.0361966	0.32499	24.4099	24.3145	21.2017	21.8324	18.6358	20.0917	12.9516	19.5516	18.5006	14.6573	15.0173	12.1296	14.7505	14.5951	17.7406	15.8096	16.1567
ENSMUSG00000075486	CJD	GadCb	Commd6	66200	2.2067e-05	0.0116949	0.379404	100.147	73.1852	94.8271	84.0236	90.1121	114.502	63.8385	58.7963	70.2884	71.926	77.0602	69.8037	95.7728	101.229	118.697	72.1182	116.667
ENSMUSG00000078747	CJD	GadCb	Gm20878	100041579	1.57004e-05	0.00953221	0.891488	24.95	12.6717	8.95664	32.7519	7.67648	28.9537	5.79411	6.82051	3.3284	7.22622	4.8762	10.5301	11.1406	7.95188	7.41499	23.2652	19.6386
ENSMUSG00000078879	CJD	GadCb	Zfp973	545490	4.9539e-05	0.0223149	-0.499955	0	0.690489	1.65005	1.23576	0.356662	0	11.5311	1.56712	2.55594	3.14792	9.03836	6.03707	0	0.122398	0	0	0
ENSMUSG00000091563	CJD	GadCb	Gm8108	623078	4.49701e-09	1.56991e-05	7.50976	1.87329	0.247071	0.987455	0.697324	0	1.29865	0	0	0	0	0	0	0	0	0.523285	0	0
ENSMUSG00000096014	CJD	GadCb	Sox1	20664	0.000137917	0.0377622	-0.315872	1.68478	1.86185	1.51412	1.63071	1.47825	1.69886	2.75677	2.6175	3.2115	3.23029	1.8161	2.4359	1.81599	0.878642	1.78339	2.26822	0.73498
Table S2. Differential expression analysis results with TPM. Gene level statistics and TPM values of differentially expressed genes (FDR ≤ 0.05) for investigated cell types and diseases.

## Sheet: FFI_Gad2_Cb
Ensembl	Disease	Celltype	symbol	Entrez	pvalue	padj	sLFC	BI54.D	BI58.D	BI59.D	BI55.D	BI56.D	BI57.D	D192.D	D180.D	D189.D	D190.D	D191.D	D179.D	BC667.D	BC668.D	BC670.D	BC672.D	BC699.D
ENSMUSG00000019874	FFI	GadCb	Fabp7	12140	8.93312e-06	0.00655691	-0.725669	21.4571	21.0843	13.5284	24.3401	13.2775	19.6925	31.0415	28.6924	40.1764	44.0531	28.6129	21.6416	18.7733	9.56908	15.4079	20.2565	11.5289
ENSMUSG00000020758	FFI	GadCb	Itgb4	192897	3.65467e-05	0.02216	-0.475115	1.30896	3.40495	2.28905	2.47401	1.60572	2.12652	4.00065	3.91666	4.80614	3.16394	3.1804	4.14957	2.75151	1.23678	2.15055	2.49788	1.25945
ENSMUSG00000022013	FFI	GadCb	Dnajc15	66148	8.78463e-05	0.0395195	0.285038	109.747	106.509	85.0324	122.678	99.1297	117.5	73.8533	69.5597	88.4166	80.6056	104.663	70.3702	112.807	118.74	129.194	94.3607	150.323
ENSMUSG00000026514	FFI	GadCb	Cnih3	72978	1.45812e-05	0.0101675	0.636355	5.37324	5.93007	5.93529	4.30683	3.72694	4.91941	3.64339	2.76182	2.45485	2.64847	3.37427	3.09341	3.56216	5.85522	5.91136	5.34835	5.99524
ENSMUSG00000030905	FFI	GadCb	Crym	12971	4.58749e-19	7.99715e-16	5.25446	0	0	0.064099	0	0.107258	0.116773	0	0.234455	0.051862	0.237827	0.128697	0.037726	7.02463	3.8554	5.68748	2.17292	2.35412
ENSMUSG00000038550	FFI	GadCb	Ciart	229599	2.1455e-05	0.0142481	0.400523	33.3287	44.1087	41.206	39.5287	40.7379	40.317	41.6524	32.6145	32.8346	33.0111	42.343	37.1613	45.6988	53.1744	50.9244	55.5276	50.6872
ENSMUSG00000039714	FFI	GadCb	Cplx3	235415	7.86987e-05	0.0365844	0.358419	5.83386	9.30104	6.59563	9.04298	8.12815	6.81806	6.1904	3.92979	4.24766	3.77244	4.02681	2.93053	5.01612	8.62174	6.34422	7.80571	10.0795
ENSMUSG00000043448	FFI	GadCb	Gjc2	118454	6.90117e-05	0.0331875	-0.344842	3.26505	10.0935	3.58045	5.27902	5.46931	5.64213	10.1811	7.07312	9.1904	8.41857	7.4213	11.7334	6.22152	3.79947	4.32099	6.65347	3.74017
ENSMUSG00000048776	FFI	GadCb	Pthlh	19227	4.41409e-05	0.0246235	0.426903	5.56713	3.20192	7.10846	4.65364	3.65029	5.82284	5.35462	3.13574	5.2476	3.74498	4.07492	5.3375	6.50092	7.9819	7.67655	9.11994	5.64873
ENSMUSG00000053398	FFI	GadCb	Phgdh	236539	5.02328e-05	0.0259462	-0.381088	12.4361	19.1311	8.34042	19.448	13.3432	13.386	21.1732	18.3926	26.6245	31.6222	19.8328	30.8376	16.5777	10.0982	13.8112	16.5633	12.0887
ENSMUSG00000054580	FFI	GadCb	Pla2r1	18779	4.65067e-05	0.0249455	-1.09685	0.048226	0	0.067025	0.020889	0.083505	0.090257	0.113286	0.11462	0.072836	0.810259	0.31393	2.47855	0.07571	0.023083	0.056965	0.086567	0.019409
ENSMUSG00000056457	FFI	GadCb	Prl2c3	18812	1.36704e-08	1.19155e-05	1.76152	2.21228	2.95941	8.855	1.95991	0.630382	3.25093	5.14569	4.38058	2.08489	4.81051	4.24905	2.24005	7.31823	13.1255	19.9298	12.7537	13.9341
ENSMUSG00000074519	FFI	GadCb	Zfp971	626848	1.55455e-21	3.0971e-18	-7.86663	0	3.00627	6.71847	2.48597	0	0	15.1077	15.4214	23.4542	6.99404	7.88077	8.44639	0	0	0	0	0.163485
ENSMUSG00000074527	FFI	GadCb	Gm14296	102639598	1.00011e-44	1.39475e-40	-8.92466	0	3.09792	5.59801	2.96626	0	0	9.81894	13.4855	10.4294	7.55363	5.40881	7.27024	0.017959	0	0.006781	0.090725	0
ENSMUSG00000074695	FFI	GadCb	Il22	50929	3.84068e-07	0.000297567	-0.867603	85.5403	79.7163	85.6608	84.664	71.8239	113.833	109.547	99.6121	109.911	75.9714	83.0561	85.4601	38.1154	32.3908	69.5857	37.8593	43.0778
ENSMUSG00000075486	FFI	GadCb	Commd6	66200	5.99876e-05	0.0298781	0.327643	100.147	73.1852	94.8271	84.0236	90.1121	114.502	63.8385	58.7963	70.2884	71.926	77.0602	69.8037	95.7728	101.229	118.697	72.1182	116.667
ENSMUSG00000078862	FFI	GadCb	Gm14326	665211	1.83131e-31	8.51315e-28	-10.85	0	9.82285	15.246	11.7745	0	0	22.5877	24.7636	36.2872	26.4311	20.3301	20.7698	0	0	0	0	0
ENSMUSG00000078866	FFI	GadCb	Zfp970	628308	2.93262e-25	8.17968e-22	-9.74864	0	6.91939	6.49762	6.03907	0	0	13.7728	11.1101	16.2985	13.1342	8.94981	9.98491	0	0	0	0	0
ENSMUSG00000078867	FFI	GadCb	Gm14418	668066	3.65552e-25	8.49666e-22	-9.88893	0	0.987112	6.42479	3.08895	0	0	10.9363	13.0072	14.261	6.39637	6.73477	8.32734	0	0	0	0	0
ENSMUSG00000078870	FFI	GadCb	Gm14410	100043403	3.32227e-07	0.000272544	-5.4077	1.04959	2.52174	10.3862	6.17957	0	1.24224	22.8095	11.8233	22.3358	7.55774	9.28489	10.7613	1.44674	0	0.181457	0	0
ENSMUSG00000078877	FFI	GadCb	Gm14295	100039123	1.87947e-28	6.55278e-25	-10.4076	0	12.3653	12.8155	10.1876	0	0.020317	25.8418	23.9336	28.5003	26.6016	33.952	47.5633	0	0	0	0.06233	0
ENSMUSG00000078878	FFI	GadCb	Gm14305	100043387	2.31218e-16	2.93143e-13	-6.02717	0.482014	9.08294	22.1644	7.26785	0.092362	0.681732	42.3488	32.7527	50.2418	11.0021	17.7902	11.5157	0.173228	0	1.02607	0.182544	0.459566
ENSMUSG00000078879	FFI	GadCb	Zfp973	545490	9.54887e-15	1.10974e-11	-8.22935	0	0.690489	1.65005	1.23576	0.356662	0	11.5311	1.56712	2.55594	3.14792	9.03836	6.03707	0	0.122398	0	0	0
ENSMUSG00000078894	FFI	GadCb	2210418O10Rik	100504263	1.37695e-17	1.92029e-14	-8.84225	0	1.47708	4.97304	1.35523	0.012142	0.051353	4.61115	1.14751	4.70484	0.686674	2.62991	3.03761	0.017959	0	0.006781	0	0
ENSMUSG00000078899	FFI	GadCb	Gm14430	627914	6.69316e-10	6.22285e-07	-1.22994	12.1524	15.2636	22.9155	14.2449	6.39633	11.4396	27.8607	30.6211	35.3147	17.6262	16.2493	16.8481	10.6887	5.66268	10.8202	9.17042	7.36032
ENSMUSG00000090461	FFI	GadCb	Iltifb	116849	2.3652e-05	0.0149932	0.595721	84.9319	50.7063	65.6642	50.3173	26.7542	73.2248	65.7208	80.7097	85.6698	46.6919	36.5385	35.4523	119.151	88.9015	178.456	88.7396	91.5764
ENSMUSG00000095362	FFI	GadCb	Gm14325	329575	2.1202e-32	1.47841e-28	-10.9787	0	18.5118	13.9631	35.5119	0	0.0396	68.2316	64.9146	67.513	46.7844	70.5754	62.5756	0	0	0	0	0
ENSMUSG00000102752	FFI	GadCb	Gm7694	665574	3.89094e-05	0.0226096	-0.473444	1.30819	1.23544	0.997153	1.27141	1.0673	1.43631	2.25114	1.49833	2.34839	2.81043	1.60939	2.36006	1.34479	1.13081	1.08367	0.870021	0.879852

## Sheet: CJD_Gad2_Cer
Ensembl	Disease	Celltype	symbol	Entrez	pvalue	padj	sLFC	BI55.A	BI56.A	BI57.A	BI58.A	BI59.A	D179.A	D180.A	D189.A	D190.A	D191.A	D192.A	BC665.A	BC666.A	BC667.A	BC670.A	BC671.A	BC672.A
ENSMUSG00000021250	CJD	GadCer	Fos	14281	4.87291e-06	0.00806185	1.04269	32.2316	27.8132	25.6649	35.9526	16.5783	4.5697	4.59983	15.8846	13.1672	16.1145	10.3716	6.69306	6.31051	13.2255	34.5326	6.24526	11.7675
ENSMUSG00000023034	CJD	GadCer	Nr4a1	15370	3.56366e-08	8.60921e-05	1.22609	45.0116	39.3379	39.5194	49.3912	24.1873	12.9602	6.89449	18.1942	19.7407	23.1925	15.7635	16.6987	22.7623	24.849	34.4258	14.1754	23.4543
ENSMUSG00000024026	CJD	GadCer	Glo1	109801	9.72745e-19	1.40999e-14	1.32807	387.839	247.56	420.96	351.114	229.499	128.746	115.636	130.624	122.479	133.376	140.276	222.023	221.652	110.561	300.757	260.06	117.962
ENSMUSG00000030653	CJD	GadCer	Pde2a	207728	1.45497e-15	1.05449e-11	-23.7418	0	0	0	0	0	0	3.91514	0	3.94166	0	0	0	0	0	0	0	0
ENSMUSG00000030703	CJD	GadCer	Gdpd3	68616	5.00563e-06	0.00806185	0.691569	38.1504	33.3383	25.8486	40.2172	21.6037	16.8024	16.4658	15.4916	24.3515	17.0369	19.1776	19.0341	18.0644	16.5077	11.0286	25.8164	7.59279
ENSMUSG00000033450	CJD	GadCer	Tagap	72536	3.80653e-09	1.10351e-05	0.823179	7.74146	7.99449	8.43799	6.15611	6.23674	4.58707	3.62605	4.51376	4.61848	3.55241	3.99857	5.19085	4.78182	4.1461	9.67915	7.78998	4.28517
ENSMUSG00000038418	CJD	GadCer	Egr1	13653	1.66704e-05	0.0201365	0.405006	125.873	108.437	141.883	152.543	117.615	83.6987	58.4018	109.147	84.8684	82.0089	100.839	68.1125	67.6702	97.1731	149.547	78.5313	75.7727
ENSMUSG00000040249	CJD	GadCer	Lrp1	16971	1.08434e-05	0.0142886	-0.480273	484.374	478.046	332.539	334.323	264.657	585.228	556.812	589.938	695.784	671.612	540.269	222.881	251.754	265.516	374.384	447.448	423.398
ENSMUSG00000052031	CJD	GadCer	Tagap1	380608	4.75265e-11	1.72224e-07	-0.752592	15.6496	17.2243	14.6032	13.7362	14.0827	23.3797	24.2274	25.0623	30.7725	29.4087	24.6383	15.0549	20.0196	21.6456	16.9224	25.4112	20.0178
ENSMUSG00000053560	CJD	GadCer	Ier2	15936	9.44908e-06	0.0136964	0.67974	14.3401	10.3637	9.37741	15.5777	13.5705	5.16737	6.95007	6.42573	9.55008	7.31074	6.1493	7.29506	7.88514	11.4532	7.6348	5.50869	8.00544
ENSMUSG00000075486	CJD	GadCer	Commd6	66200	1.95543e-05	0.0218031	0.371488	83.415	96.6172	100.898	88.1561	100.698	66.143	46.221	71.9759	57.7199	65.8475	74.0988	84.568	82.6689	79.6262	113.03	99.0267	55.3256
ENSMUSG00000078864	CJD	GadCer	Gm14322	626802	4.34432e-05	0.0449792	-0.375331	4.10093	0	0.340605	2.89025	1.57607	9.73993	12.5584	11.1582	12.0508	8.00103	11.4377	0	0	0.099774	0.206507	0	0
ENSMUSG00000078897	CJD	GadCer	Gm4724	100043915	2.78469e-06	0.00576631	-1.29739	10.016	7.89609	3.58332	2.15034	10.7273	32.2958	30.5091	31.6971	14.9447	12.7063	28.3405	1.00285	5.80509	0.114824	1.8669	8.97955	0
ENSMUSG00000094066	CJD	GadCer	Fam205a2	545611	3.69738e-13	1.78645e-09	-21.6184	0	0	0	0	0	0.781771	1.93317	0	0	0	0	0	0	0	0	2.86127	0

## Sheet: FFI_Gad2_Cer
Ensembl	Disease	Celltype	symbol	Entrez	pvalue	padj	sLFC	BI55.A	BI56.A	BI57.A	BI58.A	BI59.A	D179.A	D180.A	D189.A	D190.A	D191.A	D192.A	BC665.A	BC666.A	BC667.A	BC670.A	BC671.A	BC672.A
ENSMUSG00000000184	FFI	GadCer	Ccnd2	12444	1.15289e-05	0.00642825	0.374782	14.6772	14.4613	18.5739	10.2121	15.5626	12.4589	12.4902	15.9478	14.2738	14.5851	14.6617	17.9746	14.3967	18.042	22.5843	24.6251	17.1477
ENSMUSG00000002020	FFI	GadCer	Ltbp2	16997	8.86876e-05	0.0329668	-1.24843	0.114126	0.113881	0.264125	0.273328	0.102389	0.088874	1.47077	0.222273	0.365242	0.173281	0.205044	0.011856	0.01996	0.069954	0.069963	0	0
ENSMUSG00000004630	FFI	GadCer	Pcp2	18545	4.19382e-09	4.05318e-06	5.67324	1.94994	1.3951	421.537	0	131.886	2.33712	2.57293	0.772201	2.52555	3.64295	1.11392	10.3763	109.533	170.482	2.84895	396.32	4.7657
ENSMUSG00000007603	FFI	GadCer	Dus3l	224907	0.000171146	0.049622	-0.20771	46.5906	47.6721	45.9364	38.8716	24.9263	43.4577	47.7126	51.7136	49.2037	44.9919	46.3048	23.0733	26.2917	29.0158	37.8016	38.1506	39.335
ENSMUSG00000024299	FFI	GadCer	Adamts10	224697	2.8717e-05	0.0143555	0.605633	1.79375	1.84853	1.3116	2.91523	0.671335	0.983419	1.16012	0.786301	1.32544	0.991781	1.09189	1.3885	1.63279	2.53167	1.45248	4.3917	3.78951
ENSMUSG00000026034	FFI	GadCer	Clk1	12747	6.21017e-05	0.0257225	0.38966	14.1758	13.4109	23.3281	25.5927	14.2207	18.2563	10.2431	12.4357	14.1859	9.80826	14.387	15.7018	16.9971	20.8706	23.5402	17.6443	30.4342
ENSMUSG00000026874	FFI	GadCer	Hc	15139	0.000159892	0.0473052	1.24874	0.185974	0	0.011522	0.294592	0	0	0	0.022524	0.044287	0.081945	0.040667	0.04332	0.444824	0.042646	0.243694	0	4.13253
ENSMUSG00000027597	FFI	GadCer	Ahcy	269378	6.80885e-05	0.0266778	-0.366018	26.166	22.9218	19.6275	19.1167	13.6492	23.1828	21.0539	20.9243	27.4357	21.7549	19.0084	7.02083	10.8717	9.99459	18.9618	16.2845	12.4773
ENSMUSG00000029054	FFI	GadCer	Gabrd	14403	7.07412e-05	0.0269878	-0.286781	139.724	130.173	138.023	106.554	71.0114	137.899	136.131	146.397	134.35	146.185	149.176	67.9076	73.8195	67.4392	119.27	117.699	93.4989
ENSMUSG00000030237	FFI	GadCer	Slco1a4	28250	0.000125546	0.039566	0.346658	0.406737	0.423164	0.958176	0.423694	1.33286	0.859736	0.578136	0.50385	0.738058	0.301079	1.05833	1.54917	1.28829	1.93956	1.48523	0.832494	2.46049
ENSMUSG00000030653	FFI	GadCer	Pde2a	207728	4.22585e-16	7.65776e-13	-23.1646	0	0	0	0	0	0	3.91514	0	3.94166	0	0	0	0	0	0	0	0
ENSMUSG00000034282	FFI	GadCer	Evpl	14027	2.10386e-05	0.0108927	-0.455306	4.96	4.93848	3.20593	2.95136	2.62466	4.37369	5.34074	4.26467	5.95038	4.57477	4.57217	2.1778	2.47526	2.98681	3.17779	3.54611	1.88526
ENSMUSG00000035835	FFI	GadCer	Plppr3	216152	9.90257e-05	0.0352465	-0.205229	91.3369	98.0153	77.3549	70.725	52.9361	80.4972	79.3394	87.1186	84.4595	92.3769	89.8126	50.2184	53.672	56.3079	65.5784	75.2847	60.1376
ENSMUSG00000036402	FFI	GadCer	Gng12	14701	9.58035e-07	0.000694432	0.637684	3.48468	3.74819	6.31373	4.57421	6.26738	5.47436	3.97395	6.0584	5.94979	3.59446	5.08659	8.14489	7.27195	8.69491	7.57485	6.46039	8.71195
ENSMUSG00000037692	FFI	GadCer	Ahdc1	230793	5.09971e-05	0.0220644	-0.318083	107.06	109.217	86.5919	120.445	59.6274	100.294	95.9202	125.266	137.454	111.041	105.472	48.9192	52.4516	55.565	102.11	80.48	79.9765
ENSMUSG00000038390	FFI	GadCer	Gpr162	14788	0.000110264	0.0363506	-0.166727	210.002	197.993	195.101	149.876	135.139	190.914	177.843	196.138	203.185	196.83	207.787	129.24	145.463	149.609	168.877	156.872	153.532
ENSMUSG00000040249	FFI	GadCer	Lrp1	16971	4.65672e-07	0.000375047	-0.648724	484.374	478.046	332.539	334.323	264.657	585.228	556.812	589.938	695.784	671.612	540.269	222.881	251.754	265.516	374.384	447.448	423.398
ENSMUSG00000040380	FFI	GadCer	Cbln3	56410	1.1459e-08	9.77187e-06	3.21839	0.283342	0.160842	3.69096	1.26316	6.39764	0.407472	0.207977	0.290917	0.248385	0.49033	0.434116	2.10702	3.14128	9.67632	0.395877	1.92778	0.761908
ENSMUSG00000040483	FFI	GadCer	Xaf1	327959	9.96832e-05	0.0352465	0.379283	1.48926	2.42951	2.17697	3.17381	5.1194	2.24078	2.4607	1.68641	2.85702	1.7215	2.16615	3.63755	4.81674	4.17178	2.00686	4.9042	5.84694
ENSMUSG00000040690	FFI	GadCer	Col16a1	107581	1.42857e-05	0.00767035	0.869822	0.556063	1.453	0.689106	5.3596	4.49472	0.55968	0.393557	1.03112	1.62575	1.3484	1.44958	2.4204	3.74926	2.89739	1.44941	3.86783	3.03972
ENSMUSG00000040943	FFI	GadCer	Tet2	214133	6.68667e-05	0.0266778	0.426894	1.56994	1.0917	1.79043	2.69549	2.69927	1.3675	1.20639	1.74876	2.14264	1.19065	1.80207	1.57776	2.10794	3.36067	2.28417	3.27304	4.7453
ENSMUSG00000041261	FFI	GadCer	Car8	12319	0.000145062	0.044744	0.479883	3.43047	1.98042	67.5383	3.90267	20.9287	4.83442	2.04799	3.65949	2.85284	3.22034	4.18413	4.62031	7.75822	21.3294	4.0902	48.4341	6.3007
ENSMUSG00000042286	FFI	GadCer	Stab1	192187	0.000118329	0.0381204	0.536673	1.26307	0.501721	0.36603	0.035549	4.9499	0.742927	0.400554	2.34877	3.26401	1.06584	1.2128	3.18547	7.5834	4.99819	1.29773	19.1822	2.01991
ENSMUSG00000050423	FFI	GadCer	Ppp1r3g	76487	0.000110328	0.0363506	0.365615	0.959259	0.932457	0.893743	1.37566	2.19056	1.02353	1.56528	0.920214	1.88858	1.3563	1.10581	2.18852	3.01066	3.05317	1.57839	2.45013	3.32451
ENSMUSG00000054065	FFI	GadCer	Pkp3	56460	9.16739e-06	0.00531598	4.14304	0.051416	0.551941	1.52375	0	0.252664	0.02304	0	0.022156	0.252517	0	0.043118	0.553268	1.07805	1.43252	0.182314	5.70316	0
ENSMUSG00000064341	FFI	GadCer	ND1	17716	8.06599e-06	0.00487219	2.08123	147.308	186.602	302.582	451.117	4194.93	421.429	217.412	423.235	254.455	166.553	362.771	2905.99	1456.83	4894.81	510.482	233.648	864.618
ENSMUSG00000064345	FFI	GadCer	ND2	17717	3.60241e-05	0.0174081	1.41717	69.755	87.3812	179.712	263.416	2652.73	256.928	83.6395	254.854	110.65	63.1203	183.567	1722.04	643.977	2920.61	316.048	93.6563	453.911
ENSMUSG00000064354	FFI	GadCer	COX2	17709	0.000109623	0.0363506	0.737489	63.8228	75.6227	50.34	420.855	1787.69	301.081	228.987	57.1661	78.6955	177.618	190.246	1764.37	1518.85	1887.79	371.975	465.283	86.1477
ENSMUSG00000064363	FFI	GadCer	ND4	17719	1.71747e-06	0.00113174	2.58292	99.943	125.835	232.608	369.811	3095.55	306.245	183.466	316.163	155.726	114.935	232.863	2131.12	1276.84	3520.87	383.15	182.084	681.832
ENSMUSG00000064367	FFI	GadCer	ND5	17721	7.381e-06	0.00465227	1.63577	44.5058	54.5071	92.3604	136.547	641.468	96.2441	50.3431	123.065	67.5591	30.3841	61.9187	449.483	231.091	661.216	152.846	77.7697	235.341
ENSMUSG00000064370	FFI	GadCer	CYTB	17711	8.66006e-07	0.000660763	2.53471	167.155	198.589	257.304	371.052	3729.2	383.307	299.917	346.546	268.256	181.622	283.922	2473.3	2010.35	4148.71	460.987	319.734	644.611
ENSMUSG00000074519	FFI	GadCer	Zfp971	626848	5.51423e-09	4.99624e-06	-5.03035	2.04399	0	0.247657	3.76528	4.71335	7.65085	3.99051	13.0104	2.82429	4.177	12.0733	0	0	0.086005	0.046365	0	1.17995
ENSMUSG00000074527	FFI	GadCer	Gm14296	102639598	8.9649e-14	1.18149e-10	-6.82835	3.80738	0.039982	0.109677	11.6897	6.32336	9.69289	7.88525	14.5896	7.6987	7.9654	11.6556	0.010397	0.085238	0.007698	0.015454	0	0.333124
ENSMUSG00000078173	FFI	GadCer	Lenep	57275	3.42964e-11	3.82458e-08	5.05465	0	0	0	0	2.72614	0.213127	0	0	0	0.113297	0	1.62459	1.88559	2.71009	1.66613	1.26011	4.19623
ENSMUSG00000078862	FFI	GadCer	Gm14326	665211	6.15946e-38	8.92937e-34	-10.9309	14.4862	0	0.684751	11.0382	5.97399	26.0038	29.4012	28.1136	24.3069	23.515	33.3641	0	0	0	0	0	0
ENSMUSG00000078864	FFI	GadCer	Gm14322	626802	2.43777e-20	5.89006e-17	-7.75765	4.10093	0	0.340605	2.89025	1.57607	9.73993	12.5584	11.1582	12.0508	8.00103	11.4377	0	0	0.099774	0.206507	0	0
ENSMUSG00000078866	FFI	GadCer	Zfp970	628308	4.2604e-27	1.23526e-23	-9.33059	4.53511	0	0.106983	4.06826	2.12186	10.9949	7.226	9.32991	13.2762	9.24722	9.52419	0	0	0	0	0	0
ENSMUSG00000078867	FFI	GadCer	Gm14418	668066	1.72477e-28	6.25101e-25	-9.68923	2.84761	0	0.252474	4.8173	7.48932	10.6459	8.79101	11.5114	5.48204	7.66689	8.70748	0	0	0	0	0	0
ENSMUSG00000078877	FFI	GadCer	Gm14295	100039123	2.81933e-35	2.04359e-31	-10.6487	3.99172	0	0.77419	8.645	12.3244	25.5696	13.3461	26.3165	22.0535	18.0287	29.1409	0	0	0.026402	0	0	0
ENSMUSG00000078878	FFI	GadCer	Gm14305	100043387	5.17478e-05	0.0220644	-2.1141	5.03066	0	0.985983	18.7824	26.6074	32.6399	10.3852	38.1202	15.1077	12.2139	35.849	3.67039	0	0.524559	0.314287	0	1.15471
ENSMUSG00000078879	FFI	GadCer	Zfp973	545490	1.47309e-14	2.13554e-11	-7.89564	2.85952	0	0.272584	0	0.821282	4.96549	4.48453	2.27056	3.10474	0.894286	0.959774	0	0	0	0	0	0
ENSMUSG00000078894	FFI	GadCer	2210418O10Rik	100504263	4.19683e-05	0.0196263	-3.2981	0	0	0.154982	2.43063	0.950036	3.93305	8.90313	2.17833	1.64298	0	1.16208	0.010397	0	0.007698	0.015454	0	0.209404
ENSMUSG00000078899	FFI	GadCer	Gm14430	627914	1.29946e-06	0.00089706	-0.794574	12.6517	8.11009	10.9671	20.6177	23.6919	32.0618	25.9484	31.1049	19.4935	17.7829	27.9445	10.0892	7.54436	14.7497	14.2423	7.92537	15.4477
ENSMUSG00000090264	FFI	GadCer	Eif4ebp3	108112	0.000153308	0.0463021	1.64398	0	0	0	0	0	0	0	0	0	0.237185	0	3.04619	5.08249	2.89739	0	0	2.35246
ENSMUSG00000094103	FFI	GadCer	Fam177a2	100101807	4.28253e-18	8.86911e-15	24.7048	0	0	0	0	20.9489	0	0	0	0	0	0	9.10907	0	0	0	0	7.04402
ENSMUSG00000095362	FFI	GadCer	Gm14325	329575	2.85893e-30	1.38153e-26	-9.95653	14.7813	0	0.117279	3.40935	7.94884	29.8903	29.123	34.454	33.6717	36.4499	58.0825	0	0	0	0	0	0
ENSMUSG00000115293	FFI	GadCer	Eef1akmt4-ece2	110599584	5.81908e-15	9.37325e-12	-22.2348	0	2.47824	0	0	0	0	7.04303	0	0	2.65924	0.771987	0	0	0	0	0	0

## Sheet: CJD_PV
Ensembl	Disease	Celltype	symbol	Entrez	pvalue	padj	sLFC	BJ779.A	BJ824.A	BJ825.A	BJ826.A	BJ827.A	BJ828.A	BJ829.A	E184.A	E185.A	E212.A	E213.A	E215.A	E216.A	BD625.A	BD626.A	BD627.A	BD628.A	BD633.A
ENSMUSG00000071984	CJD	PV	Fndc1	68655	3.95254e-06	0.0292765	-0.488123	3.34693	1.94206	1.77686	2.16916	1.60859	2.13159	1.13173	3.97682	7.23197	4.13902	3.5337	5.55666	2.11205	3.3342	2.18618	4.78045	1.15773	5.28059
ENSMUSG00000102483	CJD	PV	Catspere1	631584	9.73261e-08	0.00144179	5.32179	1.62823	1.07752	0.630723	1.11861	0.611541	0.025536	0	0	0.054539	0	0.021845	0	0	0	0	0.04616	0	0

## Sheet: FFI_PV
Ensembl	Disease	Celltype	symbol	Entrez	pvalue	padj	sLFC	BJ779.A	BJ824.A	BJ825.A	BJ826.A	BJ827.A	BJ828.A	BJ829.A	E184.A	E185.A	E212.A	E213.A	E215.A	E216.A	BD625.A	BD626.A	BD627.A	BD628.A	BD633.A
ENSMUSG00000015468	FFI	PV	Notch4	18132	5.54649e-06	0.0271464	0.753778	0.939672	2.53335	1.07523	0.453943	1.42925	2.01217	2.36895	1.17242	0.707271	1.20871	0.771832	0.483003	0.949644	1.36523	3.07143	2.33995	1.18017	3.38485
ENSMUSG00000030653	FFI	PV	Pde2a	207728	1.05926e-17	1.55531e-13	25.4784	0	0	0	0	13.5946	0	0	0	0	0	0	0	0	0	6.18124	10.0693	0	0
ENSMUSG00000047976	FFI	PV	Kcna1	16485	8.68206e-07	0.00637394	-0.908712	13.3119	11.9056	11.8459	9.89287	10.1804	4.936	3.30799	9.70261	17.2594	22.5459	15.9569	10.9603	9.59865	6.14509	4.7018	6.0255	3.09648	10.9289

## Sheet: CJD_SST
Ensembl	Disease	Celltype	symbol	Entrez	pvalue	padj	sLFC	BL219.A	BL220.A	BL221.A	BL222.A	BL223.A	Z56.A	Z57.A	Z59.A	BF809.A	BF811.A	BF812.A	BF813.A	BF814.A	BF846.A
ENSMUSG00000000326	CJD	SST	Comt	12846	8.61963e-05	0.0151387	-0.354828	59.8663	61.2999	56.9829	52.7943	48.6315	88.4498	95.3903	81.393	80.6662	103.378	84.4785	98.1484	88.7971	91.7586
ENSMUSG00000000740	CJD	SST	Rpl13	270106	0.000247483	0.031826	0.342367	672.709	807.788	814.912	636.23	776.005	610.665	480.475	484.423	655.508	830.662	628.036	742.466	683.303	953.424
ENSMUSG00000001985	CJD	SST	Grik3	14807	5.19079e-05	0.0110985	-0.416897	32.7734	35.2048	37.416	38.3508	32.2074	50.2075	78.9346	54.2147	29.4144	43.3795	45.1734	28.6815	30.1634	32.3193
ENSMUSG00000002274	CJD	SST	Metrn	70083	0.000499945	0.0487973	0.328019	80.7219	96.3809	125.998	128.466	80.6894	78.9154	56.6629	53.6826	126.802	82.7321	97.8509	98.4171	121.496	98.7203
ENSMUSG00000002799	CJD	SST	Jag2	16450	0.000135382	0.0203888	-0.360479	12.3338	17.2726	14.4872	14.6158	16.3468	22.509	23.279	28.5994	12.5357	19.2547	12.4416	10.0408	13.2033	8.52843
ENSMUSG00000003429	CJD	SST	Rps11	27207	0.000100497	0.0164736	0.386363	568.917	677.533	667.174	670.978	598.725	521.968	422.02	360.8	600.684	650.65	673.252	589.361	585.57	906.409
ENSMUSG00000005417	CJD	SST	Mprip	26936	3.68809e-05	0.00873774	0.500052	334.114	443.12	464.779	261.832	581.878	233.694	238.059	187.503	359.611	555.056	320.008	185.964	478.801	464.292
ENSMUSG00000006390	CJD	SST	Elovl1	54325	0.000352978	0.0400575	0.346131	10.2964	12.5943	11.3342	10.2805	14.674	7.69175	5.58204	7.30722	9.3095	10.5407	7.67395	12.2682	13.2179	14.2131
ENSMUSG00000008683	CJD	SST	Rps15a	267019	0.000367758	0.0401891	0.3151	298.982	306.7	306.478	399.125	291.508	248.927	248.959	209.365	303.589	256.845	435.721	304.159	294.517	279.619
ENSMUSG00000009927	CJD	SST	Rps25	75617	9.43894e-05	0.0158834	0.376394	702.733	782.476	855.247	779.971	745.876	614.384	564.169	455.099	720.396	835.718	800.533	720.629	714.937	959.27
ENSMUSG00000010064	CJD	SST	Slc38a3	76257	1.28639e-05	0.00433788	0.518939	15.1593	20.0805	21.2846	18.7218	22.2842	12.2103	12.5477	10.2001	19.7067	26.3478	17.6976	19.6726	27.4854	21.8629
ENSMUSG00000015090	CJD	SST	Ptgds	19215	1.5635e-05	0.0047074	0.467638	680.365	814.339	893.519	951.875	686.701	607.219	467.569	512.768	665.168	682.291	730.222	675.143	592.899	740.111
ENSMUSG00000018830	CJD	SST	Myh11	17880	1.35741e-05	0.00433788	0.630115	3.10084	3.67308	2.2954	2.31316	1.99319	1.4573	1.15485	0.948471	1.4181	1.49725	0.617548	0.667075	1.11852	1.6542
ENSMUSG00000019960	CJD	SST	Dusp6	67603	0.000371391	0.0402877	-0.31455	15.9649	18.387	21.7087	19.9263	20.4867	27.2421	31.3867	33.7149	25.7157	18.0878	28.4244	20.0014	28.4916	17.2219
ENSMUSG00000020261	CJD	SST	Slc36a1	215335	0.000339648	0.0394553	0.270065	183.355	180.616	184.745	168.481	164.514	149.485	145.4	135.728	181.123	195.905	189.761	184.322	147.91	184.707
ENSMUSG00000020361	CJD	SST	Hspa4	15525	2.25087e-06	0.00103772	-0.436784	121.609	106.423	98.7199	110.731	101.058	148.119	177.286	197.87	109.255	110.424	122.649	90.8864	111.372	96.7966
ENSMUSG00000020423	CJD	SST	Btg2	12227	2.97089e-05	0.007969	-0.459773	7.11139	6.72263	7.38736	6.62225	5.93405	13.9319	10.7299	12.4143	8.60423	8.99021	6.26853	3.98887	8.443	10.1321
ENSMUSG00000020460	CJD	SST	Rps27a	78294	9.85061e-06	0.00382437	0.443397	608.416	687.415	692.481	689.247	740.359	533.738	415.23	486.677	676.604	632.552	673.595	638.262	601.512	689.864
ENSMUSG00000020900	CJD	SST	Myh10	77579	1.5808e-06	0.000777385	0.541086	869.243	821.55	790.146	626.682	806.048	420.567	489.687	618.592	668.071	632.836	476.374	311.144	692.407	534.299
ENSMUSG00000021124	CJD	SST	Vti1b	53612	0.000407466	0.0432471	0.299653	248.663	256.971	245.639	241.14	298.128	211.875	184.757	193.713	236.574	204.776	247.136	260.362	242.914	243.719
ENSMUSG00000021131	CJD	SST	Erh	13877	0.000248084	0.031826	0.321982	130.354	134.259	123.9	142.932	153.184	98.5242	114.424	94.3591	125.51	108.687	145.168	134.629	122.598	117.278
ENSMUSG00000021250	CJD	SST	Fos	14281	1.08764e-19	8.02299e-16	-1.66571	8.06948	8.71825	7.22449	6.3208	8.39226	28.4707	24.0718	30.2074	10.3227	10.9817	24.3984	8.00435	8.57828	16.8203
ENSMUSG00000021256	CJD	SST	Vash1	238328	8.20135e-05	0.0147554	-0.428924	6.19194	9.70083	8.52394	8.70549	6.10119	15.2839	16.0983	13.8634	6.51614	9.01625	6.77769	5.54532	6.43747	8.80894
ENSMUSG00000021277	CJD	SST	Traf3	22031	3.05604e-05	0.00805104	-0.322444	13.8374	14.6837	14.9236	13.8847	12.7952	19.2584	21.4836	21.3414	15.5892	16.7085	13.5783	11.022	15.2599	12.7316
ENSMUSG00000021339	CJD	SST	Mrs2	380836	5.0524e-06	0.0020705	-0.377659	24.3671	25.1485	23.512	22.4501	20.9977	35.5353	34.7926	36.4459	25.7399	24.5155	22.5157	17.4777	24.2069	18.9528
ENSMUSG00000021700	CJD	SST	Rab3c	67295	0.000421092	0.0434482	-0.273659	165.625	150.152	146.045	175.382	141.632	189.509	244.033	252.815	150.176	125.341	162.785	127.292	150.282	125.655
ENSMUSG00000021998	CJD	SST	Lcp1	18826	5.19212e-07	0.000318113	0.700623	8.4684	8.2981	7.1918	8.18745	6.90255	5.01986	3.50744	3.85092	9.06176	7.79035	5.89885	6.08517	9.74859	9.8558
ENSMUSG00000022548	CJD	SST	Apod	11815	3.26869e-05	0.00846016	0.45993	85.1216	80.2877	71.2042	87.3168	58.8523	56.1645	44.6707	43.786	81.4279	69.4207	75.1206	68.0977	83.4131	75.1551
ENSMUSG00000022602	CJD	SST	Arc	11838	2.28502e-07	0.000160528	-0.950309	23.7251	25.1833	35.1413	19.4714	39.7909	84.3685	77.1017	68.7704	31.0036	54.9384	29.3025	20.4113	39.497	46.2328
ENSMUSG00000023034	CJD	SST	Nr4a1	15370	5.91663e-08	5.81921e-05	-0.85167	20.6167	29.0874	32.0159	19.7809	32.1617	64.3511	62.8009	65.7385	29.5986	46.5232	24.4905	16.0491	30.6658	28.0088
ENSMUSG00000024042	CJD	SST	Sik1	17691	0.000397468	0.0424916	-0.335131	4.82862	6.84919	5.98707	5.52609	7.4213	10.4647	10.9468	10.5556	6.17904	6.75192	6.9315	3.6702	5.66131	5.34026
ENSMUSG00000024127	CJD	SST	Prepl	213760	0.000502758	0.0487973	-0.263666	191.413	204.358	166.125	179.567	154.518	238.1	254.735	285.62	163.116	159.796	176.543	151.06	141.396	157.935
ENSMUSG00000024190	CJD	SST	Dusp1	19252	5.39065e-07	0.000318113	-0.58981	22.0891	25.0657	27.6194	28.3271	30.4122	46.0379	47.2902	59.2338	31.1956	37.3355	28.3092	23.9422	35.1465	30.2827
ENSMUSG00000024400	CJD	SST	Wdr33	74320	0.000478575	0.0477055	-0.273138	29.0051	27.2251	28.4133	29.2415	23.7297	40.924	41.8441	38.1891	30.7567	32.0965	30.8515	25.9601	32.7283	23.2718
ENSMUSG00000024661	CJD	SST	Fth1	14319	7.59876e-13	2.80261e-09	0.662996	2734.93	2834.07	2972.24	2856.83	2558.79	1881.87	1694.28	1811.52	3041.64	2468.78	2552.71	2850.16	3347.78	3744.71
ENSMUSG00000024991	CJD	SST	Eif3a	13669	3.57589e-07	0.00022937	-0.549188	207.98	258.434	241.117	194.72	212.735	349.078	372.955	476.477	164.856	187.934	154.723	111.219	146.654	173.68
ENSMUSG00000025290	CJD	SST	Rps24	20088	7.52457e-06	0.00300027	0.485017	859.753	866.292	989.75	1070.73	1066.52	720.68	625.651	580.894	931.878	860.005	1049.67	890.015	867.303	1012.67
ENSMUSG00000025348	CJD	SST	Itga7	16404	0.000179158	0.0256613	0.386969	7.37781	9.23568	9.82956	6.8616	10.6127	5.05132	4.74589	6.30714	7.41514	7.36477	4.53296	8.73697	7.34873	8.11866
ENSMUSG00000025362	CJD	SST	Rps26	27370	1.38196e-05	0.00433788	0.423793	271.662	274.655	286.696	256.554	265.862	208.001	198.195	171.555	252.504	321.308	283.094	318.387	245.657	348.221
ENSMUSG00000025757	CJD	SST	Hspa4l	18415	2.93083e-05	0.007969	-0.386325	46.5059	40.4977	33.6253	44.0395	37.7742	58.7797	65.6558	70.5528	42.3207	34.7856	48.3303	36.2608	38.9081	27.0833
ENSMUSG00000025794	CJD	SST	Rpl14	67115	0.000420939	0.0434482	0.309104	536.885	524.715	593.572	511.53	558.801	475.423	353.782	380.284	514.218	501.109	472.866	535.746	482.957	589.782
ENSMUSG00000026064	CJD	SST	Ptp4a1	19243	1.32197e-07	0.000102647	4.85239	0.595658	2.07444	0.428953	0.656551	0.866881	0.032378	0.0431	0	0.517905	0.787514	0.615291	1.14497	0	0
ENSMUSG00000026490	CJD	SST	Cdc42bpa	226751	0.000123003	0.0191017	-0.329303	118.138	117.065	112.902	99.2421	123.459	150.692	176.726	203.889	97.3683	96.4424	84.4513	62.5069	92.0647	83.3407
ENSMUSG00000026495	CJD	SST	Efcab2	68226	0.000195383	0.0269391	-0.363556	20.399	21.3058	18.7401	19.7781	13.2538	31.4157	35.6225	29.1685	20.8507	20.1477	18.4398	14.5395	17.3223	15.3204
ENSMUSG00000026532	CJD	SST	Spta1	20739	4.21196e-05	0.0091381	0.954517	0.204515	0.227039	0.218987	0.16126	0.169242	0	0.016692	0	0.181493	0.021148	0.099157	0.039809	0.226301	0.111925
ENSMUSG00000026553	CJD	SST	Copa	12847	0.000422304	0.0434482	-0.243739	101.731	98.312	92.3098	91.2637	96.6442	128.328	134.122	138.038	86.7554	86.5088	95.8644	71.6372	95.7331	81.6467
ENSMUSG00000026701	CJD	SST	Prdx6	11758	9.84601e-05	0.0163212	0.355513	217.187	233.546	239.779	255.812	264.815	195.085	152.565	187.583	232.039	172.07	221.979	220.303	291.98	250.093
ENSMUSG00000026812	CJD	SST	Tsc1	64930	3.73129e-05	0.00873774	-0.34617	22.6334	24.6423	23.6403	22.5951	23.8933	29.7682	38.5941	39.6002	20.388	26.7946	18.9091	14.2882	19.2392	21.6347
ENSMUSG00000026867	CJD	SST	Gapvd1	66691	6.69524e-05	0.0129967	-0.336467	37.3861	34.1408	33.4691	34.517	39.0942	48.1357	55.6637	60.6557	36.6191	37.3495	37.4039	25.3967	32.7602	26.2109
ENSMUSG00000026874	CJD	SST	Hc	15139	0.000418214	0.0434482	0.182512	0.807493	0.37602	0.56014	0.745033	0.296092	0.102265	0	0.044051	0.786375	0.059985	0.010332	1.68213	0.333865	0.074311
ENSMUSG00000026879	CJD	SST	Gsn	227753	5.27212e-12	1.29633e-08	1.34057	161.384	228.186	160.568	132.909	180.115	82.9387	59.1138	64.7232	173.473	158.632	122.728	90.4045	205.21	177.635
ENSMUSG00000027048	CJD	SST	Abcb11	27413	0.000364105	0.0401891	-0.22596	0	0	0.017924	0	0.018348	0.062243	0.060308	1.34337	0.034571	0	0.011544	0	0	0
ENSMUSG00000027288	CJD	SST	Zfp106	20402	0.000136819	0.0203888	-0.268992	66.488	70.0365	69.9969	64.8208	65.2921	90.3542	100.467	93.9672	69.7432	68.6524	66.1988	48.4407	70.7092	64.2722
ENSMUSG00000027296	CJD	SST	Itpka	228550	7.43136e-05	0.0138778	0.436616	217.211	194.704	290.284	172.198	299.272	147.542	130.678	146.398	175.569	198.571	145.184	105.406	233.63	190.982
ENSMUSG00000027712	CJD	SST	Anxa5	11747	0.000283023	0.0347953	0.303394	118.269	127.046	135.209	144.809	142.603	106.344	105.636	96.9154	108.656	91.857	124.727	122.444	109.483	139.709
ENSMUSG00000028053	CJD	SST	Ash1l	192195	5.6852e-05	0.0118132	-0.362087	20.314	18.4132	16.5334	17.63	16.0823	23.1331	28.8082	32.8517	16.629	18.0579	16.4232	11.4024	15.8458	13.1813
ENSMUSG00000028495	CJD	SST	Rps6	20104	0.000234983	0.031447	0.327292	651.903	742.088	807.699	804.401	743.288	616.02	562.206	482.869	661.924	713.709	792.759	698.192	663.583	872.398
ENSMUSG00000028530	CJD	SST	Jak1	16451	3.58601e-05	0.00867287	-0.331317	62.8898	58.0308	55.7741	54.1294	53.7433	78.1909	91.0876	86.2221	54.554	48.9479	55.0619	43.1856	50.1993	44.1769
ENSMUSG00000029361	CJD	SST	Nos1	18125	0.000338141	0.0394553	-0.336546	24.1225	25.0768	24.647	21.9163	26.0892	39.3027	51.4715	32.5379	21.9907	32.2205	24.4486	21.1274	21.9539	28.9817
ENSMUSG00000029501	CJD	SST	Ankle2	71782	0.000255601	0.0324672	-0.297955	17.8538	17.3834	15.2398	19.2851	15.403	23.6151	24.6417	28.615	15.5041	16.2763	17.4709	18.4301	14.361	12.8831
ENSMUSG00000029516	CJD	SST	Cit	12704	8.88194e-09	1.09196e-05	-0.672932	23.7699	26.6616	25.4244	22.3386	28.4099	48.2475	54.7051	45.3771	18.74	22.4361	18.9553	14.7476	20.1835	20.954
ENSMUSG00000029723	CJD	SST	Tsc22d4	78829	8.36924e-05	0.0148761	0.417999	73.6496	79.2765	99.6512	78.6214	95.9623	64.7905	48.9681	49.0535	99.1119	84.1617	77.7093	93.0046	115.81	122.042
ENSMUSG00000030172	CJD	SST	Erc1	111173	6.95227e-05	0.0133204	-0.326101	10.7665	10.4357	11.8557	10.6048	10.9511	15.3218	17.6177	16.4612	11.2856	12.6895	12.18	9.12002	10.454	12.8291
ENSMUSG00000030739	CJD	SST	Myh14	71960	4.80883e-06	0.00202699	0.506717	169.821	227.149	215.035	154.884	192.892	127.317	115.824	133.872	187.486	172.182	115.193	103.465	214.152	206.999
ENSMUSG00000030983	CJD	SST	Bccip	66165	0.000111246	0.0176474	0.317188	103.136	99.9189	102.2	100.546	115.368	78.256	80.9491	85.7213	88.8163	104.025	99.1784	91.3578	97.4819	95.2948
ENSMUSG00000031320	CJD	SST	Rps4x	20102	0.00045348	0.0455115	0.294543	452.183	475.603	497.727	498.785	457.015	401.935	376.99	310.17	460.24	467.168	530.182	502.487	498.834	520.46
ENSMUSG00000031385	CJD	SST	Plxnb3	140571	0.000424086	0.0434482	0.329675	7.56542	9.72245	7.30383	7.63087	6.29164	5.81466	4.69932	5.268	7.31874	7.51765	3.35614	4.2113	6.60866	5.81596
ENSMUSG00000031561	CJD	SST	Tenm3	23965	1.08636e-05	0.00389459	-0.439466	9.01299	11.1205	8.52969	8.41121	9.18061	13.5406	15.7842	17.3358	6.9363	10.1852	8.00212	5.57194	7.0321	6.69478
ENSMUSG00000031683	CJD	SST	Lsm6	78651	0.00051761	0.0499105	0.324405	65.3197	75.9067	81.8216	69.1177	84.8783	63.0152	39.1958	47.3435	58.5756	61.1495	68.5544	73.3642	60.8118	109.947
ENSMUSG00000031732	CJD	SST	Phlpp2	244650	0.000259685	0.0324672	-0.27498	19.1138	19.9917	18.4419	17.2436	17.6096	23.7131	26.2701	30.3982	15.2696	16.1418	15.2473	12.4886	15.0738	14.714
ENSMUSG00000031775	CJD	SST	Pllp	67801	0.000360299	0.0401891	0.346425	45.7663	61.9349	46.9209	52.36	31.2214	32.6735	24.3176	32.1479	63.1573	46.5202	40.5911	46.4549	67.7401	59.7238
ENSMUSG00000032118	CJD	SST	Fez1	235180	0.0002912	0.0352137	0.318546	562.54	673.312	667.651	515.821	670.82	483.66	420.835	481.397	423.606	460.011	443.686	354.176	480.365	542.073
ENSMUSG00000032216	CJD	SST	Nedd4	17999	7.74351e-05	0.01428	-0.371928	174.648	156.53	162.686	162.87	171.094	209.319	259.706	347.424	185.492	171.511	186.516	127.832	185.817	138.21
ENSMUSG00000032352	CJD	SST	Lrrc1	214345	0.000245048	0.031826	0.36825	10.0079	10.0143	10.1523	11.047	15.0751	7.3163	6.78969	4.82796	10.8086	9.24683	6.80076	7.92081	9.96188	8.19934
ENSMUSG00000032458	CJD	SST	Copb2	50797	0.000182447	0.0258811	-0.27572	72.7013	74.4956	73.9022	65.6813	72.1489	100.635	102.831	105.143	66.5736	69.1918	71.0693	55.6301	58.6969	68.3469
ENSMUSG00000032540	CJD	SST	Abhd5	67469	0.0002445	0.031826	0.36699	13.9536	11.1111	11.3425	10.969	20.1488	7.55783	8.11926	6.57045	13.068	7.18795	10.7386	11.7593	14.6162	11.581
ENSMUSG00000032744	CJD	SST	Heyl	56198	3.48339e-05	0.00867287	0.51955	1.90025	2.9996	1.92713	2.43698	2.67628	0.986611	1.0927	1.43418	2.34293	2.65583	1.78582	2.41196	1.97571	2.58591
ENSMUSG00000033004	CJD	SST	Mycbp2	105689	0.000119937	0.0188237	-0.35688	99.4287	93.604	88.1486	78.2231	106.853	130.715	163.931	160.681	84.5039	91.7547	72.3708	44.0809	86.1712	58.6286
ENSMUSG00000033063	CJD	SST	Cntnap3	238680	0.000288787	0.0352106	-0.354108	3.2453	2.01781	2.3548	3.53167	2.19601	4.39335	7.86789	5.18759	3.1388	4.90837	4.37663	3.17919	3.02416	1.30765
ENSMUSG00000033278	CJD	SST	Ptprm	19274	0.000174968	0.0253069	-0.321394	24.6678	28.2832	26.1795	21.8508	25.8425	36.039	42.288	39.1436	22.0214	27.8544	27.4089	22.0615	20.445	28.6092
ENSMUSG00000033436	CJD	SST	Armcx2	67416	0.00032492	0.0389719	-0.293703	72.4321	63.6116	58.1247	66.7552	54.9234	85.7498	103.854	95.6533	66.3649	66.0447	70.6942	57.3423	64.7785	46.5305
ENSMUSG00000033565	CJD	SST	Rbfox2	93686	0.000360179	0.0401891	-0.233615	62.6424	66.9397	67.5905	67.8383	57.7986	82.3206	87.3347	94.438	61.4692	59.5584	63.2137	51.3352	58.1289	66.1785
ENSMUSG00000033624	CJD	SST	Pdpr	319518	5.96176e-05	0.0122158	-0.452793	4.44883	5.1079	3.9241	5.29307	2.79932	8.2811	7.74343	10.0223	3.80119	4.09902	3.96777	3.81442	3.2821	4.00445
ENSMUSG00000034675	CJD	SST	Dbn1	56320	9.89364e-08	8.10894e-05	0.80505	337.013	332.202	377.176	249.495	468.893	189.11	168.25	177.547	334.004	443.741	246.877	167.223	338.604	327.549
ENSMUSG00000034813	CJD	SST	Grip1	74053	0.00013381	0.0203888	-0.361895	13.7637	11.8789	11.7211	10.6689	10.3686	16.1728	21.4443	20.3932	14.2206	16.6257	14.3707	12.4054	11.6399	10.2399
ENSMUSG00000034891	CJD	SST	Sncb	104069	1.10874e-05	0.00389459	0.519606	1277.38	1344.41	1435.45	1221.44	1247.57	899.023	894.297	563.208	1071.55	1514.41	1247.72	1454.09	1107.27	1001.65
ENSMUSG00000034892	CJD	SST	Rps29	20090	3.54844e-05	0.00867287	0.472038	1034.68	1055.13	1256.28	1298.34	1251.82	869.334	730.26	517.889	1110.7	1316.32	1292.2	1230.96	1114.97	1249.82
ENSMUSG00000036667	CJD	SST	Tcaf1	77574	6.59975e-05	0.0129822	-0.287139	138.434	131.397	119.315	126.98	122.301	168.638	178.651	201.045	123.905	126.331	121.838	97.7839	114.12	110.665
ENSMUSG00000037031	CJD	SST	Tspan15	70423	6.45453e-05	0.0128681	0.459178	7.20431	11.7204	9.63455	11.7827	11.977	5.31891	6.77655	4.72243	9.576	8.99795	7.28175	8.90704	11.0375	9.09029
ENSMUSG00000037536	CJD	SST	Fbxo34	78938	9.47428e-05	0.0158834	0.400645	109.254	107.422	115.142	77.2696	126.569	65.4563	69.7526	80.3989	89.4434	110.743	71.2364	47.6771	99.4594	85.3871
ENSMUSG00000037868	CJD	SST	Egr2	13654	1.07119e-06	0.000585308	-1.30999	0.649102	0.802923	0.826192	0.5122	0.824533	1.96094	2.96733	3.39667	0.675821	0.802982	2.98604	0.497086	1.1201	3.40776
ENSMUSG00000037990	CJD	SST	Sh3rf3	237353	0.000194311	0.0269391	-0.327351	8.9328	9.20794	10.6019	8.53031	8.23713	12.2732	15.1306	15.5987	8.62743	9.90999	9.39742	7.5607	10.3915	8.8235
ENSMUSG00000038418	CJD	SST	Egr1	13653	2.83278e-05	0.007969	-0.426143	35.2129	38.9927	37.0292	37.0676	46.4461	61.1496	74.8752	63.3181	47.1188	54.7631	77.6762	38.5329	50.7418	42.9379
ENSMUSG00000038437	CJD	SST	Mllt6	246198	0.000431282	0.0438808	-0.290112	32.0607	40.7145	43.3276	37.6166	37.79	55.1237	62.8665	55.9515	32.3899	42.3388	32.5738	24.0583	33.8411	36.0606
ENSMUSG00000038708	CJD	SST	Golga4	54214	9.39208e-65	1.38561e-60	2.32553	956.182	1042.52	933.263	897.891	1158.7	205.33	223.726	206.793	1031.07	751.976	681.967	560.419	822.502	1138.27
ENSMUSG00000038738	CJD	SST	Shank1	243961	0.000481858	0.0477104	-0.328175	37.3211	47.8684	51.9422	52.1383	56.3298	66.2454	115.506	80.8528	27.1674	45.6279	41.7762	29.2301	32.026	30.5301
ENSMUSG00000038900	CJD	SST	Rpl12	269261	0.000136093	0.0203888	0.395482	303.855	334.687	384.117	263.504	377.991	258.723	177.805	197.74	305.991	405.693	276.511	291.247	303.898	420.876
ENSMUSG00000039103	CJD	SST	Nexn	68810	6.35342e-05	0.01284	0.437334	24.3165	24.8612	21.8911	16.1144	25.154	12.9596	14.6733	14.4022	20.0985	16.7983	15.7389	11.3949	25.142	21.6403
ENSMUSG00000039262	CJD	SST	Prrc2b	227723	8.13869e-05	0.0147554	-0.305898	85.8192	100.179	92.269	80.9898	84.2844	122.525	126.364	143.101	80.5789	85.2146	75.6223	59.2571	78.5621	74.2775
ENSMUSG00000040209	CJD	SST	Zfp704	170753	0.000333051	0.039308	-0.265935	8.32465	8.19465	8.35895	8.03552	7.65327	9.89618	11.9424	13.1961	8.85467	7.65274	7.74387	4.68165	8.72867	6.34457
ENSMUSG00000040997	CJD	SST	Abhd4	105501	0.000446407	0.0451085	0.314499	35.518	47.1934	45.3102	47.28	47.6227	35.7817	27.9753	33.0955	50.5361	38.3735	40.9823	41.2124	53.9801	44.726
ENSMUSG00000041453	CJD	SST	Rpl21	19933	2.54376e-05	0.00735844	0.424059	603.933	612.995	688.128	619.463	609.778	498.174	433.911	370.381	557.152	629.334	674.086	566.97	557.102	796.192
ENSMUSG00000041841	CJD	SST	Rpl37	67281	1.32175e-05	0.00433788	0.527507	448.274	527.611	618.007	438.042	537.965	376.908	266.44	251.835	459.919	561.092	435.74	464.04	456.057	601.005
ENSMUSG00000042035	CJD	SST	Igsf3	78908	0.000236604	0.031447	-0.301227	8.19202	7.92661	7.1143	7.43924	8.2303	10.6942	12.2528	12.2572	8.1572	10.1972	10.2338	7.27579	8.71899	7.3025
ENSMUSG00000042425	CJD	SST	Frmpd3	245643	1.08948e-05	0.00389459	-0.432865	12.871	14.7465	13.9477	11.7961	14.8246	21.3606	24.042	22.5465	11.0722	14.5263	12.4486	9.39944	10.8139	11.3309
ENSMUSG00000042699	CJD	SST	Dhx9	13211	0.000109166	0.0175058	-0.380434	64.595	52.9567	47.1422	56.4208	59.6303	72.7479	99.6684	115.845	56.7573	49.951	52.6014	42.9647	51.6907	38.2351
ENSMUSG00000043384	CJD	SST	Gprasp1	67298	1.35015e-05	0.00433788	-0.477057	203.001	191.395	174.034	190.244	260.008	333.52	399.849	370.068	189.145	186.328	202.181	132.8	180.529	146.939
ENSMUSG00000043460	CJD	SST	Elfn2	207393	1.7186e-06	0.000817886	-0.464751	31.3434	36.9874	39.8266	34.233	32.4782	51.8219	63.7584	58.3384	29.4373	40.7254	32.1648	27.0975	34.2473	32.303
ENSMUSG00000043940	CJD	SST	Wdfy3	72145	8.60741e-08	7.46971e-05	-0.513974	25.4823	27.0743	24.3181	26.0085	21.7735	35.1082	44.467	46.5304	19.5498	19.195	20.3868	13.8972	16.5111	15.7535
ENSMUSG00000045328	CJD	SST	Cenpe	229841	4.15986e-05	0.0091381	-0.624999	0.267161	0.126318	0.137273	0.254243	0.022501	0.765536	0.560726	3.27009	1.49827	0.240054	0.641658	0.205399	0.32305	1.52671
ENSMUSG00000046056	CJD	SST	Sbsn	282619	3.44442e-05	0.00867287	0.688721	7.95128	9.2778	3.89881	3.61527	18.2541	1.71626	2.44965	1.66936	3.28734	11.6608	2.94456	5.69205	2.92471	12.4128
ENSMUSG00000046330	CJD	SST	Rpl37a	19981	1.13488e-06	0.000595877	0.536385	481.06	534.129	537.525	585.959	551.352	381.871	369.194	301.127	485.558	560.298	591.329	487.573	484.759	637.028
ENSMUSG00000046364	CJD	SST	Rpl27a	26451	0.000151517	0.0223533	0.358385	345.24	410.764	428.367	358.685	391.468	322.262	244.953	256.634	342.351	454.798	368.144	352.505	340.481	549.206
ENSMUSG00000046691	CJD	SST	Chtf8	214987	1.68379e-07	0.000124205	-0.631797	15.3831	13.7762	14.4417	11.5904	11.9908	21.9526	27.2172	29.9491	11.7947	18.4771	18.9034	10.871	14.9634	8.70437
ENSMUSG00000047675	CJD	SST	Rps8	20116	0.000396753	0.0424916	0.332876	865.467	836.411	963.245	778.816	973.371	741.838	568.915	493.104	800.24	920.715	703.44	796.342	875.75	1036.49
ENSMUSG00000048118	CJD	SST	Arid4a	238247	0.000200421	0.0273779	-0.333903	9.16959	9.43832	8.50563	9.93888	10.3657	12.5026	15.6767	17.3446	9.69405	10.0141	9.78399	7.17147	8.08455	9.65659
ENSMUSG00000049336	CJD	SST	Tenm2	23964	8.75841e-05	0.0152015	-0.279509	15.2367	15.4282	15.3079	15.1534	14.2223	19.3192	22.8082	22.165	12.4398	13.883	11.663	8.69366	13.7623	10.5264
ENSMUSG00000049517	CJD	SST	Rps23	66475	4.02405e-05	0.00913336	0.393461	435.139	456.363	477.917	460.295	461.226	375.28	317.563	289.735	447.655	436.782	509.345	455.712	429.729	442.17
ENSMUSG00000049659	CJD	SST	Aftph	216549	2.4041e-11	5.06682e-08	0.676288	284.089	300.079	267.003	275.652	228.862	150.62	165.408	196.72	267.011	220.989	196.156	186.888	206.533	263.73
ENSMUSG00000049804	CJD	SST	Armcx4	100503043	8.12678e-08	7.46971e-05	-0.680197	26.5341	21.6587	20.9418	24.2706	20.1299	33.4795	52.901	53.7199	22.045	20.9866	21.3385	15.4757	18.7703	16.8646
ENSMUSG00000051149	CJD	SST	Adnp	11538	7.42077e-05	0.0138778	-0.494051	1.46363	3.16216	1.21072	1.76524	4.67849	5.5297	8.14756	14.4534	0.222175	4.25495	1.53966	1.97065	1.01941	1.37751
ENSMUSG00000052105	CJD	SST	Mtcl1	68617	8.90935e-05	0.0152837	-0.384008	22.5521	21.9208	26.0589	24.0975	20.4275	28.8793	39.2778	49.0679	21.8652	26.3283	21.3394	15.5395	22.003	21.4247
ENSMUSG00000052305	CJD	SST	Hbb-b1	15129	0.00025761	0.0324672	0.345778	212.293	118.9	235.203	199.896	305.903	150.697	63.0423	73.8723	111.227	153.96	244.103	90.4421	100.223	261.015
ENSMUSG00000052310	CJD	SST	Slc39a1	30791	0.000348195	0.040047	0.308785	23.1947	29.5682	28.4596	27.3557	28.6251	21.2677	20.5314	20.1693	27.4889	30.1358	27.4661	25.4781	25.9488	34.214
ENSMUSG00000052837	CJD	SST	Junb	16477	2.2889e-09	3.37681e-06	-0.89529	15.305	18.1923	23.2239	18.2011	19.1202	45.5229	47.7698	39.1151	20.5284	31.6011	21.4581	18.3354	20.1135	23.2242
ENSMUSG00000053141	CJD	SST	Ptprt	19281	0.00020409	0.0276233	-0.329224	35.6055	32.2186	27.9212	31.2043	25.8806	39.056	52.5157	53.758	32.5764	30.3823	35.8669	26.6703	29.603	20.6248
ENSMUSG00000053644	CJD	SST	Aldh7a1	110695	1.75862e-05	0.00518897	-0.452574	42.1903	59.0641	59.6367	59.0008	51.3797	100.414	94.5539	87.4729	40.0816	63.1071	59.5902	50.7967	48.724	62.6802
ENSMUSG00000056673	CJD	SST	Kdm5d	20592	5.17494e-12	1.29633e-08	23.4812	5.23158	4.65463	0	0	0	0	0	0	4.77767	4.89728	0	0	0.046259	0
ENSMUSG00000057572	CJD	SST	Zbtb8os	67106	4.1743e-05	0.0091381	0.433779	71.4433	77.2318	77.0816	78.1512	91.1714	55.2886	54.4257	46.5725	60.4691	60.3477	75.5122	77.2373	68.9836	88.1653
ENSMUSG00000057738	CJD	SST	Sptan1	20740	2.82092e-09	3.78337e-06	0.913582	1290.08	1126.21	1207.77	864.163	1453.36	635.086	514.117	611.313	1354.81	1191.37	776.023	568.166	1326.61	1330.19
ENSMUSG00000060636	CJD	SST	Rpl35a	57808	0.000274212	0.0339954	0.340554	524.664	649.33	689.146	678.215	634.009	530.817	409.145	397.1	595.898	644.562	733.413	581.77	582.358	758.07
ENSMUSG00000060938	CJD	SST	Rpl26	19941	0.000107496	0.0174273	0.389718	802.589	850.87	965.485	996.083	930.195	716.655	628.013	490.194	848.66	958.297	1073.39	886.411	889.32	1201.37
ENSMUSG00000061578	CJD	SST	Ksr2	333050	1.17132e-06	0.000595877	-0.45605	10.7642	12.6302	13.1792	12.499	11.8121	16.8901	20.5892	22.3338	9.86873	10.0825	10.3394	6.31103	9.21026	11.1972
ENSMUSG00000061983	CJD	SST	Rps12	20042	2.75185e-07	0.000184536	0.610429	409.179	461.779	498.345	481.206	503.827	333.626	269.607	259.249	465.041	479.386	497.309	417.733	410.746	542.834
ENSMUSG00000062328	CJD	SST	Rpl17	319195	2.57489e-06	0.00115113	0.425286	493.901	570.957	609.632	600.121	538.137	414.746	426.263	402.994	498.619	565.457	655.635	538.233	485.028	698.072
ENSMUSG00000063077	CJD	SST	Kif1b	16561	5.48811e-05	0.0115666	-0.315506	138.764	144.641	130.279	131.49	112.718	174.635	204.256	204.626	128.452	112.701	110.692	86.741	118.832	101.861
ENSMUSG00000064360	CJD	SST	ND3	17718	3.42842e-10	5.61993e-07	21.3637	30.9517	0	0	95.4955	0	0	0	0	0	56.4646	0	0	0	0
ENSMUSG00000066687	CJD	SST	Zbtb16	235320	0.00035017	0.040047	-0.319171	8.09709	8.52239	7.98213	8.87135	7.08531	10.075	14.6873	14.4755	6.91984	7.8562	8.13731	4.36381	5.76377	4.82332
ENSMUSG00000068457	CJD	SST	Uty	22290	2.11847e-10	3.90672e-07	21.6184	3.16471	1.30084	0	0	0	0	0	0	3.23423	2.21873	0	0	0	0
ENSMUSG00000069045	CJD	SST	Ddx3y	26900	3.72078e-13	1.82976e-09	24.7208	24.8853	8.85946	0	0	0	0	0	0	28.3181	8.86294	0	0.116728	0.061706	0
ENSMUSG00000072966	CJD	SST	Gprasp2	245607	0.000327866	0.0390081	-0.338126	110.18	93.5851	73.1433	109.354	113.107	138.334	174.225	198.961	106.226	79.2065	102.218	81.5418	86.3624	72.8982
ENSMUSG00000073702	CJD	SST	Rpl31	114641	2.55565e-08	2.6931e-05	0.616795	840.917	850.156	879.266	882.469	888.967	619.926	533.983	490.365	772.833	839.188	905.816	759.282	820.193	950.266
ENSMUSG00000073877	CJD	SST	Gm13306	100039863	0.000158297	0.0231223	0.362104	28.6698	7.03859	25.9382	17.1121	34.0884	6.29234	7.32918	2.22695	7.76748	10.0606	4.80402	2.41409	7.44978	6.80986
ENSMUSG00000074785	CJD	SST	Plxnc1	54712	0.00049359	0.0485463	-0.290251	14.2771	13.4815	12.257	16.0477	11.3109	17.9074	20.7883	23.2699	15.5638	15.0667	17.1457	14.0392	13.3556	11.5275
ENSMUSG00000078161	CJD	SST	Erich3	209601	2.12015e-08	2.40605e-05	-0.549089	18.5751	18.6968	16.9641	17.2878	15.2462	26.3684	30.035	33.4676	16.5337	16.6135	14.547	10.4809	15.0771	13.5333
ENSMUSG00000078193	CJD	SST	Gm2000	100038991	2.90156e-05	0.007969	0.748092	12.2845	11.4509	15.0385	12.5223	53.6636	3.81818	2.03877	5.02225	15.0112	15.7923	8.26069	8.53306	13.1695	5.09851
ENSMUSG00000078671	CJD	SST	Chd2	244059	1.47734e-05	0.00454067	-0.46403	22.4931	22.1844	25.1719	21.1838	21.6228	33.2354	34.2063	53.0333	21.137	22.8974	19.8971	15.282	20.9212	14.826
ENSMUSG00000078747	CJD	SST	Gm20878	100041579	3.98953e-05	0.00913336	0.640494	24.9741	7.01308	18.044	20.376	44.205	5.83855	7.54656	4.15347	4.38741	11.657	7.92443	3.77288	10.4002	5.8834
ENSMUSG00000079435	CJD	SST	Rpl36a	19982	1.04224e-05	0.00389459	0.416761	334.298	361.078	376.015	424.692	380.121	284.411	265.622	264.817	341.974	359.918	454.947	346.937	330.678	467.399
ENSMUSG00000090733	CJD	SST	Rps27	57294	9.81479e-07	0.000556914	0.556755	948.677	1131.41	1172.02	1151.4	1089.59	815.757	602.176	679.908	984.952	1187.47	1215.78	870.622	949.432	1596.92
ENSMUSG00000093674	CJD	SST	Rpl41	67945	0.000367603	0.0401891	0.311847	944.898	972.299	1086.74	908.566	925.318	837.113	642.765	675.04	892.178	1206.35	944.571	1012.5	965.56	1162.47
ENSMUSG00000102440	CJD	SST	Pcdhga9	93717	0.000191604	0.0269213	-0.384406	2.09135	2.05498	1.96538	1.83761	1.52797	4.47365	3.51492	3.3205	2.34762	2.07335	2.66817	2.79572	1.60319	3.14269
ENSMUSG00000103749	CJD	SST	Pcdhgb5	93702	3.04133e-06	0.00131967	-0.5904	1.9168	2.32252	2.20941	2.52975	1.81263	4.00883	4.44005	4.81741	2.39143	2.81427	2.47492	2.10672	2.51636	1.20795

## Sheet: FFI_SST
Ensembl	Disease	Celltype	symbol	Entrez	pvalue	padj	sLFC	BL219.A	BL220.A	BL221.A	BL222.A	BL223.A	Z56.A	Z57.A	Z59.A	BF809.A	BF811.A	BF812.A	BF813.A	BF814.A	BF846.A
ENSMUSG00000069045	FFI	SST	Ddx3y	26900	1.58051e-13	1.75779e-10	24.3304	24.8853	8.85946	0	0	0	0	0	0	28.3181	8.86294	0	0.116728	0.061706	0
ENSMUSG00000069049	FFI	SST	Eif2s3y	26908	5.88215e-13	5.60737e-10	23.7262	26.3266	21.2661	0.36408	0	0	0	0	0	23.476	29.7901	0	0	0.05391	0
ENSMUSG00000056673	FFI	SST	Kdm5d	20592	3.57294e-12	3.17896e-09	22.8667	5.23158	4.65463	0	0	0	0	0	0	4.77767	4.89728	0	0	0.046259	0
ENSMUSG00000068457	FFI	SST	Uty	22290	7.19836e-11	5.05628e-08	21.3458	3.16471	1.30084	0	0	0	0	0	0	3.23423	2.21873	0	0	0	0
ENSMUSG00000102483	FFI	SST	Catspere1	631584	1.1044e-18	2.45656e-15	5.90579	1.50599	0.793781	1.01152	0.015264	0.105587	0.059791	0.045316	0	2.08625	1.97537	2.72222	2.3911	2.21083	1.30577
ENSMUSG00000032204	FFI	SST	Aqp9	64008	4.97219e-07	0.000126077	2.27954	1.23363	0.733229	0.559483	0.837799	0	0.392634	0.288516	0.147711	1.72324	2.95529	1.11598	2.17855	1.61991	0.935687
ENSMUSG00000038708	FFI	SST	Golga4	54214	3.80114e-26	1.691e-22	2.10736	956.182	1042.52	933.263	897.891	1158.7	205.33	223.726	206.793	1031.07	751.976	681.967	560.419	822.502	1138.27
ENSMUSG00000048001	FFI	SST	Hes5	15208	1.42797e-10	9.52882e-08	1.10667	9.5876	7.25409	7.4942	9.52224	7.02293	6.99444	5.59211	5.85455	16.1086	14.6813	11.8959	11.4304	14.2924	13.1146
ENSMUSG00000026879	FFI	SST	Gsn	227753	6.51212e-09	2.89703e-06	1.05399	161.384	228.186	160.568	132.909	180.115	82.9387	59.1138	64.7232	173.473	158.632	122.728	90.4045	205.21	177.635
ENSMUSG00000041607	FFI	SST	Mbp	17196	2.91324e-09	1.49539e-06	1.03629	1554.46	1954.51	1654.8	1607.83	1104.6	1319.88	1022.64	1493.86	3330.55	2351.51	1861.38	2111.1	3661.43	3196.4
ENSMUSG00000010064	FFI	SST	Slc38a3	76257	5.37298e-09	2.47268e-06	0.865448	15.1593	20.0805	21.2846	18.7218	22.2842	12.2103	12.5477	10.2001	19.7067	26.3478	17.6976	19.6726	27.4854	21.8629
ENSMUSG00000048707	FFI	SST	Tprn	97031	1.24254e-06	0.000243866	0.859648	19.4865	33.117	54.0912	25.1121	56.8471	25.1346	20.7562	22.7746	44.6976	61.0627	40.213	24.5047	65.8893	75.3895
ENSMUSG00000029484	FFI	SST	Anxa3	11745	1.38649e-05	0.00136395	0.856107	1.29727	1.56567	2.08804	2.99478	2.44152	1.31421	1.50673	0.484872	3.87773	4.59781	2.32571	3.54792	3.98352	6.27807
ENSMUSG00000034595	FFI	SST	Ppp1r18	76448	4.83315e-06	0.000645032	0.793044	4.18185	4.76377	5.30663	5.00696	12.3176	3.2353	2.67305	1.28639	6.48687	5.54331	4.91094	5.14387	7.03161	5.46732
ENSMUSG00000031875	FFI	SST	Cmtm3	68119	1.47722e-06	0.000270069	0.792548	5.08224	5.3307	4.97525	6.2848	5.25996	3.48716	3.69728	2.56802	8.50453	6.11843	6.0537	5.34185	7.69559	7.35873
ENSMUSG00000032744	FFI	SST	Heyl	56198	1.14442e-06	0.000231416	0.764896	1.90025	2.9996	1.92713	2.43698	2.67628	0.986611	1.0927	1.43418	2.34293	2.65583	1.78582	2.41196	1.97571	2.58591
ENSMUSG00000031775	FFI	SST	Pllp	67801	1.60945e-07	4.88176e-05	0.750893	45.7663	61.9349	46.9209	52.36	31.2214	32.6735	24.3176	32.1479	63.1573	46.5202	40.5911	46.4549	67.7401	59.7238
ENSMUSG00000029723	FFI	SST	Tsc22d4	78829	1.44264e-07	4.51948e-05	0.748887	73.6496	79.2765	99.6512	78.6214	95.9623	64.7905	48.9681	49.0535	99.1119	84.1617	77.7093	93.0046	115.81	122.042
ENSMUSG00000007872	FFI	SST	Id3	15903	2.00241e-06	0.000347068	0.745206	14.2434	10.7683	13.0028	12.287	13.9857	7.83993	9.38561	5.69359	17.2838	20.5307	12.6637	11.9521	14.529	15.4429
ENSMUSG00000021998	FFI	SST	Lcp1	18826	1.26267e-06	0.000244226	0.742842	8.4684	8.2981	7.1918	8.18745	6.90255	5.01986	3.50744	3.85092	9.06176	7.79035	5.89885	6.08517	9.74859	9.8558
ENSMUSG00000024661	FFI	SST	Fth1	14319	8.70966e-09	3.63247e-06	0.72	2734.93	2834.07	2972.24	2856.83	2558.79	1881.87	1694.28	1811.52	3041.64	2468.78	2552.71	2850.16	3347.78	3744.71
ENSMUSG00000091476	FFI	SST	Catspere2	545391	2.11096e-05	0.00192965	0.719593	2.30089	1.45174	1.75951	1.02747	1.46995	0.419677	1.08798	1.11363	3.39871	2.50242	2.59707	1.91094	2.56219	1.19801
ENSMUSG00000069763	FFI	SST	Tmem100	67888	8.56033e-06	0.000997115	0.706025	2.26002	1.82341	1.99983	3.16577	2.4374	2.17161	2.01511	2.28418	4.35637	3.1688	4.12382	4.73752	6.18832	4.97338
ENSMUSG00000052374	FFI	SST	Actn2	11472	6.79337e-06	0.000834425	0.687828	15.2079	16.4398	25.0732	10.5481	52.185	15.8746	12.3304	8.46941	17.0566	31.4812	19.7041	24.5138	25.6236	30.4331
ENSMUSG00000034892	FFI	SST	Rps29	20090	4.35521e-07	0.000116249	0.673504	1034.68	1055.13	1256.28	1298.34	1251.82	869.334	730.26	517.889	1110.7	1316.32	1292.2	1230.96	1114.97	1249.82
ENSMUSG00000061983	FFI	SST	Rps12	20042	2.97318e-08	1.13371e-05	0.672876	409.179	461.779	498.345	481.206	503.827	333.626	269.607	259.249	465.041	479.386	497.309	417.733	410.746	542.834
ENSMUSG00000074457	FFI	SST	S100a16	67860	4.62851e-06	0.000636825	0.635707	36.63	42.3709	42.3257	38.2055	28.1347	29.963	19.6868	27.538	50.7677	37.062	33.1245	46.447	55.7773	52.1073
ENSMUSG00000033208	FFI	SST	S100b	20203	4.43428e-06	0.000616457	0.630349	113.499	148.74	130.492	147.226	95.4806	94.8235	77.8269	113.853	216.281	121.721	122.89	142.507	206.077	195.438
ENSMUSG00000037736	FFI	SST	Limch1	77569	7.95191e-06	0.000947555	0.627239	72.0064	80.4653	68.3799	56.3546	103.371	41.1757	36.0334	65.6089	97.6236	106.241	76.1836	47.4059	104.313	83.6264
ENSMUSG00000026255	FFI	SST	Efhd1	98363	1.3899e-05	0.00136395	0.622774	5.05203	7.31072	5.40782	8.73783	2.66812	4.61116	4.41506	4.58779	11.2655	5.96541	7.13348	7.14682	10.7194	9.35333
ENSMUSG00000004270	FFI	SST	Lpcat3	14792	8.70567e-07	0.000190469	0.621926	9.05907	12.8369	10.0158	9.43136	15.1913	7.87532	8.88055	7.21151	13.1976	11.86	12.9465	13.6446	11.6238	15.1067
ENSMUSG00000057738	FFI	SST	Sptan1	20740	1.24724e-05	0.00128044	0.6174	1290.08	1126.21	1207.77	864.163	1453.36	635.086	514.117	611.313	1354.81	1191.37	776.023	568.166	1326.61	1330.19
ENSMUSG00000022548	FFI	SST	Apod	11815	1.0271e-07	3.34334e-05	0.616217	85.1216	80.2877	71.2042	87.3168	58.8523	56.1645	44.6707	43.786	81.4279	69.4207	75.1206	68.0977	83.4131	75.1551
ENSMUSG00000041841	FFI	SST	Rpl37	67281	2.22592e-06	0.000376039	0.60768	448.274	527.611	618.007	438.042	537.965	376.908	266.44	251.835	459.919	561.092	435.74	464.04	456.057	601.005
ENSMUSG00000073702	FFI	SST	Rpl31	114641	6.29719e-08	2.21164e-05	0.607378	840.917	850.156	879.266	882.469	888.967	619.926	533.983	490.365	772.833	839.188	905.816	759.282	820.193	950.266
ENSMUSG00000006301	FFI	SST	Tmbim1	69660	3.68757e-06	0.000573921	0.590813	18.6133	24.452	18.3986	24.0797	12.6074	15.9128	11.6447	13.0736	22.7103	18.4258	20.3842	23.5054	28.6658	20.1069
ENSMUSG00000000594	FFI	SST	Gm2a	14667	1.45615e-07	4.51948e-05	0.58776	18.5843	22.1469	20.165	23.4542	17.282	17.0211	14.3305	16.397	23.5857	21.5677	21.1912	23.5843	26.9185	27.4278
ENSMUSG00000026421	FFI	SST	Csrp1	13007	3.89639e-06	0.000583314	0.58569	98.1574	117.513	111.272	114.088	86.8748	91.8678	72.2758	74.5018	136.927	104.61	102.855	120.595	153.938	161.935
ENSMUSG00000002274	FFI	SST	Metrn	70083	6.24744e-06	0.00079408	0.576687	80.7219	96.3809	125.998	128.466	80.6894	78.9154	56.6629	53.6826	126.802	82.7321	97.8509	98.4171	121.496	98.7203
ENSMUSG00000046330	FFI	SST	Rpl37a	19981	8.53971e-07	0.000190469	0.575711	481.06	534.129	537.525	585.959	551.352	381.871	369.194	301.127	485.558	560.298	591.329	487.573	484.759	637.028
ENSMUSG00000020733	FFI	SST	Slc9a3r1	26941	1.56481e-05	0.00150245	0.575223	9.56565	9.02518	9.55042	12.2751	2.90228	8.88543	6.10873	6.46788	15.0852	12.2201	9.37298	10.7134	13.48	13.9197
ENSMUSG00000019874	FFI	SST	Fabp7	12140	5.2751e-05	0.00378502	0.565997	17.7782	26.3219	15.0098	23.6354	30.0114	13.2709	16.0611	18.9985	43.9151	26.547	45.3505	25.1874	28.6745	18.9514
ENSMUSG00000060938	FFI	SST	Rpl26	19941	4.72308e-06	0.000643207	0.563998	802.589	850.87	965.485	996.083	930.195	716.655	628.013	490.194	848.66	958.297	1073.39	886.411	889.32	1201.37
ENSMUSG00000055945	FFI	SST	Prr18	320111	9.43478e-06	0.0010493	0.557493	27.6032	31.1149	29.6334	32.5974	17.7687	24.8971	21.3989	29.3902	44.9376	35.1381	32.192	30.8311	55.6584	45.0991
ENSMUSG00000039830	FFI	SST	Olig2	50913	1.47249e-05	0.00143444	0.55642	10.133	10.2419	9.37146	12.3955	10.9544	7.65571	7.83193	8.15393	16.4088	10.4323	9.92104	14.2044	15.4179	11.5278
ENSMUSG00000037031	FFI	SST	Tspan15	70423	1.34717e-05	0.00134174	0.553738	7.20431	11.7204	9.63455	11.7827	11.977	5.31891	6.77655	4.72243	9.576	8.99795	7.28175	8.90704	11.0375	9.09029
ENSMUSG00000034675	FFI	SST	Dbn1	56320	3.02002e-05	0.00248797	0.551142	337.013	332.202	377.176	249.495	468.893	189.11	168.25	177.547	334.004	443.741	246.877	167.223	338.604	327.549
ENSMUSG00000022500	FFI	SST	Litaf	56722	5.2223e-05	0.00376739	0.543115	9.74972	14.1821	9.60688	12.0721	6.51396	6.37181	5.04287	10.6597	15.4408	11.5035	8.9362	13.3124	16.4664	12.484
ENSMUSG00000025362	FFI	SST	Rps26	27370	6.07675e-06	0.000779811	0.536871	271.662	274.655	286.696	256.554	265.862	208.001	198.195	171.555	252.504	321.308	283.094	318.387	245.657	348.221
ENSMUSG00000025290	FFI	SST	Rps24	20088	8.36806e-07	0.000190469	0.533356	859.753	866.292	989.75	1070.73	1066.52	720.68	625.651	580.894	931.878	860.005	1049.67	890.015	867.303	1012.67
ENSMUSG00000055717	FFI	SST	Slain1	105439	9.18235e-07	0.00019452	0.53071	25.066	25.1904	23.8077	28.1291	19.6187	22.8975	22.3051	20.2458	33.6405	27.7789	32.1186	27.684	33.3374	35.5172
ENSMUSG00000090733	FFI	SST	Rps27	57294	2.52223e-05	0.0021578	0.530186	948.677	1131.41	1172.02	1151.4	1089.59	815.757	602.176	679.908	984.952	1187.47	1215.78	870.622	949.432	1596.92
ENSMUSG00000021508	FFI	SST	Cxcl14	57266	9.50341e-07	0.000198176	0.529857	42.7638	38.0031	46.0081	41.2062	44.5889	39.4541	37.9906	35.304	53.4408	53.027	47.2794	49.86	60.9148	62.6144
ENSMUSG00000033006	FFI	SST	Sox10	20665	4.39618e-05	0.00341113	0.524815	14.1153	15.0327	11.9598	14.0639	13.455	10.3072	7.77102	11.8639	21.8685	14.9533	10.8583	15.087	19.4357	17.4261
ENSMUSG00000032517	FFI	SST	Mobp	17433	2.51569e-05	0.0021578	0.522383	410.949	426.999	361.783	362.849	277.891	326.691	351.101	395.047	708.715	516.62	397.837	415.07	754.144	612.022
ENSMUSG00000078202	FFI	SST	Nrarp	67122	6.36755e-05	0.00426734	0.520117	6.88833	9.39201	9.13878	9.95531	10.0492	5.98269	4.97018	10.1754	11.9289	11.0096	9.41095	10.5371	12.3346	16.1566
ENSMUSG00000038900	FFI	SST	Rpl12	269261	2.32359e-05	0.00205321	0.519708	303.855	334.687	384.117	263.504	377.991	258.723	177.805	197.74	305.991	405.693	276.511	291.247	303.898	420.876
ENSMUSG00000031765	FFI	SST	Mt1	17748	9.33674e-06	0.00104713	0.515488	184.665	180.863	199.051	218.115	220.265	163.192	162.828	127.118	197.707	233.634	196.1	215.724	262.624	257.278
ENSMUSG00000022018	FFI	SST	Rgcc	66214	4.82285e-05	0.00360543	0.515377	12.8499	12.1938	12.5437	15.3393	19.0294	11.8278	11.8464	14.7865	22.3283	16.3755	18.0326	18.6111	22.4756	27.5168
ENSMUSG00000024608	FFI	SST	Rps14	20044	9.8956e-06	0.00107371	0.509891	485.751	525.289	557.348	607.845	558.516	462.912	390.763	302.503	539.969	590.264	587.723	546.778	565.854	631.807
ENSMUSG00000028955	FFI	SST	Vamp3	22319	2.28215e-05	0.00203859	0.508779	9.62276	11.0608	7.63539	12.0854	10.3075	9.42257	7.65584	9.90855	15.563	12.3962	13.744	14.1823	16.2415	10.612
ENSMUSG00000028581	FFI	SST	Laptm5	16792	9.608e-05	0.00567382	0.494455	9.62233	10.8346	10.4444	11.0002	6.62753	7.77886	8.10456	5.01098	10.9229	11.5192	8.48548	12.3153	14.1787	12.7934
ENSMUSG00000030088	FFI	SST	Aldh1l1	107747	9.08189e-05	0.00546899	0.493567	27.5593	37.9929	34.2715	28.5271	27.1002	25.9081	20.8827	16.1729	32.1406	30.175	24.9416	41.0519	40.4627	39.813
ENSMUSG00000005417	FFI	SST	Mprip	26936	0.000140149	0.00756227	0.493019	334.114	443.12	464.779	261.832	581.878	233.694	238.059	187.503	359.611	555.056	320.008	185.964	478.801	464.292
ENSMUSG00000026385	FFI	SST	Dbi	13167	2.06105e-05	0.00189702	0.486335	134.771	118.711	131.526	172.937	152.126	111.73	116.563	98.481	148.822	137.62	167.265	164.377	144.022	192.509
ENSMUSG00000003429	FFI	SST	Rps11	27207	6.07714e-05	0.00413803	0.480822	568.917	677.533	667.174	670.978	598.725	521.968	422.02	360.8	600.684	650.65	673.252	589.361	585.57	906.409
ENSMUSG00000009927	FFI	SST	Rps25	75617	2.26277e-05	0.00203859	0.479446	702.733	782.476	855.247	779.971	745.876	614.384	564.169	455.099	720.396	835.718	800.533	720.629	714.937	959.27
ENSMUSG00000034120	FFI	SST	Srsf2	20382	7.70912e-06	0.000935327	0.47778	134.011	111.612	103.913	143.016	199.954	69.1608	97.3457	97.3124	132.672	134.731	132.358	119.017	112.007	101.53
ENSMUSG00000060636	FFI	SST	Rpl35a	57808	2.60469e-05	0.00220659	0.477722	524.664	649.33	689.146	678.215	634.009	530.817	409.145	397.1	595.898	644.562	733.413	581.77	582.358	758.07
ENSMUSG00000020460	FFI	SST	Rps27a	78294	1.86378e-06	0.000331654	0.47724	608.416	687.415	692.481	689.247	740.359	533.738	415.23	486.677	676.604	632.552	673.595	638.262	601.512	689.864
ENSMUSG00000029219	FFI	SST	Slc10a4	231290	0.000237571	0.0108124	0.476164	3.71836	5.31511	4.19345	6.37049	0.439826	3.36516	2.31015	2.97502	6.25684	3.98131	5.50985	7.24115	4.04125	6.91805
ENSMUSG00000040759	FFI	SST	Cmtm5	67272	4.50998e-05	0.0034592	0.476036	29.7216	36.103	31.59	32.0737	34.8288	25.6931	20.9731	25.3883	38.4836	29.1913	30.1478	34.6261	40.0705	40.7743
ENSMUSG00000093674	FFI	SST	Rpl41	67945	2.19883e-05	0.0019963	0.474181	944.898	972.299	1086.74	908.566	925.318	837.113	642.765	675.04	892.178	1206.35	944.571	1012.5	965.56	1162.47
ENSMUSG00000030307	FFI	SST	Slc6a11	243616	2.41103e-05	0.00208946	0.472295	60.8046	104.279	70.271	90.9207	56.9094	54.2587	48.8167	81.1027	102.891	73.1797	80.6195	85.4627	91.1685	87.3238
ENSMUSG00000027375	FFI	SST	Mal	17153	0.000158965	0.00825505	0.472105	92.1172	110.999	85.3085	102.159	58.9566	58.3117	47.9485	99.9181	139.714	82.9037	86.5955	98.4185	148.379	112.534
ENSMUSG00000019772	FFI	SST	Vip	22353	0.000281971	0.0122181	0.466401	12.0143	7.90142	8.70686	12.8866	28.8657	8.18038	10.4519	14.6832	24.7296	29.2953	33.7945	12.3685	26.081	10.3907
ENSMUSG00000034891	FFI	SST	Sncb	104069	0.000135456	0.00742252	0.464149	1277.38	1344.41	1435.45	1221.44	1247.57	899.023	894.297	563.208	1071.55	1514.41	1247.72	1454.09	1107.27	1001.65
ENSMUSG00000049517	FFI	SST	Rps23	66475	1.19106e-05	0.00124186	0.463015	435.139	456.363	477.917	460.295	461.226	375.28	317.563	289.735	447.655	436.782	509.345	455.712	429.729	442.17
ENSMUSG00000052310	FFI	SST	Slc39a1	30791	1.31367e-05	0.00131822	0.460473	23.1947	29.5682	28.4596	27.3557	28.6251	21.2677	20.5314	20.1693	27.4889	30.1358	27.4661	25.4781	25.9488	34.214
ENSMUSG00000046160	FFI	SST	Olig1	50914	0.000115083	0.00654203	0.459435	46.5382	52.4933	49.688	52.4286	37.8189	41.8749	27.8589	48.9812	70.9982	48.2028	48.2837	60.2612	70.5001	58.2907
ENSMUSG00000041453	FFI	SST	Rpl21	19933	5.77061e-05	0.00402554	0.459342	603.933	612.995	688.128	619.463	609.778	498.174	433.911	370.381	557.152	629.334	674.086	566.97	557.102	796.192
ENSMUSG00000013698	FFI	SST	Pea15a	18611	2.51135e-06	0.000413783	0.458959	394.457	444.503	442.211	402.581	396.865	376.134	368.618	337.446	487.091	460.635	444.765	433.623	526.387	542.527
ENSMUSG00000020629	FFI	SST	Adi1	104923	6.52473e-05	0.00433229	0.456722	62.4995	56.164	46.9057	68.9908	44.3991	42.1551	46.872	47.6218	80.7898	49.6535	66.1465	60.9199	80.9462	55.6591
ENSMUSG00000044080	FFI	SST	S100a1	20193	0.000142209	0.00762215	0.456532	29.992	24.1274	31.5655	42.1404	35.1962	26.4775	28.3083	20.5414	35.4347	38.2453	33.1704	33.3191	47.9232	43.3969
ENSMUSG00000039533	FFI	SST	Mmd2	75104	5.81694e-05	0.00402554	0.456224	39.5994	48.0039	46.1197	45.2502	39.8608	30.8885	26.8847	42.3167	54.4085	38.1323	42.0359	42.938	56.8404	50.4317
ENSMUSG00000008668	FFI	SST	Rps18	20084	5.3548e-05	0.00382167	0.455704	462.791	481.394	570.608	548.642	463.057	434.853	386.295	297.501	484.311	540.808	568.062	495.253	511.95	617.011
ENSMUSG00000067288	FFI	SST	Rps28	54127	5.09522e-05	0.00374596	0.45534	596.909	598.256	693.545	643.637	790.56	539.845	464.286	395.833	584.542	761.81	715.731	626.513	591.028	729.273
ENSMUSG00000021750	FFI	SST	Fam107a	268709	0.000136024	0.00742252	0.454983	43.5287	45.2122	51.075	55.3732	55.5918	41.0569	43.8242	54.5746	72.4428	55.462	54.9602	59.3167	104.773	72.7786
ENSMUSG00000058546	FFI	SST	Rpl23a	268449	4.8357e-05	0.00360543	0.454378	583.614	623.328	680.568	708.902	714.531	587.088	488.171	418.837	600.666	712.987	753.637	722.07	685.659	782.691
ENSMUSG00000079435	FFI	SST	Rpl36a	19982	4.56704e-05	0.00348295	0.453781	334.298	361.078	376.015	424.692	380.121	284.411	265.622	264.817	341.974	359.918	454.947	346.937	330.678	467.399
ENSMUSG00000017724	FFI	SST	Etv4	18612	0.000344325	0.0136931	0.452926	3.92192	4.79154	3.84127	5.9206	6.78424	3.6212	2.05313	2.04955	4.64403	6.06584	3.05403	5.64084	5.38917	5.36598
ENSMUSG00000038539	FFI	SST	Atf5	107503	0.000169004	0.00870862	0.452915	24.1775	24.7705	27.3964	25.059	34.1721	25.7324	25.468	16.0341	34.3677	42.4279	28.1786	36.5879	32.2011	34.7625
ENSMUSG00000040997	FFI	SST	Abhd4	105501	3.58654e-05	0.00288349	0.450048	35.518	47.1934	45.3102	47.28	47.6227	35.7817	27.9753	33.0955	50.5361	38.3735	40.9823	41.2124	53.9801	44.726
ENSMUSG00000031320	FFI	SST	Rps4x	20102	2.03797e-05	0.0018888	0.447814	452.183	475.603	497.727	498.785	457.015	401.935	376.99	310.17	460.24	467.168	530.182	502.487	498.834	520.46
ENSMUSG00000062328	FFI	SST	Rpl17	319195	4.16229e-05	0.00324854	0.445527	493.901	570.957	609.632	600.121	538.137	414.746	426.263	402.994	498.619	565.457	655.635	538.233	485.028	698.072
ENSMUSG00000061787	FFI	SST	Rps17	20068	6.63822e-05	0.00436422	0.445049	584.583	713.191	774.156	793.238	633.928	606.971	554.983	446.697	698.666	773.493	844.108	691.095	666.651	883.487
ENSMUSG00000053931	FFI	SST	Cnn3	71994	1.28338e-05	0.00129815	0.444639	33.9724	37.7293	34.3606	36.5324	23.3173	27.2	30.3139	32.6286	44.1838	37.2323	36.3875	42.9883	44.44	35.3409
ENSMUSG00000025283	FFI	SST	Sat1	20229	3.80242e-06	0.000576672	0.444005	38.5288	36.2115	29.2819	43.883	44.5972	28.9428	31.3757	29.834	40.8316	38.9652	41.8316	37.367	38.2348	39.7153
ENSMUSG00000064351	FFI	SST	COX1	17708	0.000400583	0.0151022	0.443448	5210.6	2724.58	2850.86	7194.04	3136.82	2735.84	3772.12	4497.71	7889.73	3543.41	8156.39	7876.1	9878.27	3421.02
ENSMUSG00000048583	FFI	SST	Igf2	16002	0.000116913	0.00655599	0.441457	26.4939	25.212	28.2927	44.0478	32.214	25.5904	22.8935	19.0135	32.7512	26.3139	36.7607	28.5694	39.5065	31.63
ENSMUSG00000078193	FFI	SST	Gm2000	100038991	0.000296409	0.0125583	0.438003	12.2845	11.4509	15.0385	12.5223	53.6636	3.81818	2.03877	5.02225	15.0112	15.7923	8.26069	8.53306	13.1695	5.09851
ENSMUSG00000061477	FFI	SST	Rps7	20115	3.39481e-05	0.00274588	0.437307	427.189	425.282	464.174	400.872	553.129	356.948	285.425	394.993	424.92	487.159	425.745	516.105	433.142	507.85
ENSMUSG00000025508	FFI	SST	Rplp2	67186	0.000235222	0.0107879	0.436758	439.168	413.793	508.882	422.998	536.4	430.444	337.336	234.161	452.107	535.012	489.207	535.47	463.158	572.719
ENSMUSG00000012848	FFI	SST	Rps5	20103	3.61123e-05	0.00288596	0.434817	412.172	436.781	447.902	442.431	388.734	364.278	346.797	268.491	422.087	450.282	457.467	440.848	447.594	445.551
ENSMUSG00000032122	FFI	SST	Slc37a2	56857	0.000438547	0.0159036	0.433309	0.607411	0.993848	0.8668	0.758937	0.752245	0.739554	0.493194	0.405366	0.990037	1.64544	0.726761	1.41306	1.63795	1.02703
ENSMUSG00000048644	FFI	SST	Ctxn1	330695	0.000136259	0.00742252	0.432847	300.206	253.597	298.887	247.367	280.702	252.107	242.695	196.643	303.355	359.525	249.342	296.304	376.126	390.569
ENSMUSG00000038059	FFI	SST	Smim3	106878	0.000474516	0.0167537	0.432289	3.08496	2.74961	3.70567	3.87283	2.75518	2.89381	2.55204	1.63391	4.65996	3.86593	3.19247	4.25793	4.6359	4.90053
ENSMUSG00000000740	FFI	SST	Rpl13	270106	0.000150436	0.00793563	0.430975	672.709	807.788	814.912	636.23	776.005	610.665	480.475	484.423	655.508	830.662	628.036	742.466	683.303	953.424
ENSMUSG00000024176	FFI	SST	Sox8	20681	9.11554e-05	0.00546899	0.429177	10.0365	14.2416	12.8622	16.187	9.6507	12.8406	10.8859	11.4402	17.0813	14.801	14.0009	14.2061	19.2495	18.0435
ENSMUSG00000042659	FFI	SST	Arrdc4	66412	0.000305052	0.0127265	0.428181	6.99889	7.05467	6.39681	5.43634	3.73983	4.63169	4.61386	3.43069	6.0477	7.45752	5.80897	5.67077	5.98853	7.30131
ENSMUSG00000020644	FFI	SST	Id2	15902	0.00030917	0.0127931	0.427664	65.2813	43.2012	52.347	73.4676	55.532	39.0459	40.2489	73.1007	84.7756	66.7205	81.764	71.2974	91.1508	55.203
ENSMUSG00000008682	FFI	SST	Rpl10	110954	3.78263e-05	0.00300494	0.427274	554.003	583.033	643.854	605.198	580.373	523.222	482.347	404.84	596.201	607.105	677.958	622.592	607.647	672.683
ENSMUSG00000031762	FFI	SST	Mt2	17750	0.000297549	0.0125667	0.426978	85.9619	99.9646	110.507	116.158	89.9588	87.6637	79.9197	64.6574	119.862	109.148	98.0247	87.1149	153.608	131.423
ENSMUSG00000007892	FFI	SST	Rplp1	56040	0.000215064	0.0101065	0.426703	1350.86	1141.07	1382.17	1745.41	1111.06	1065.73	1152.84	694.552	1393.58	1308.03	1661.11	1334.06	1537.2	1241.38
ENSMUSG00000078249	FFI	SST	Hmga1b	111241	0.000347303	0.013754	0.426611	60.7802	49.6046	144.61	55.2026	46.1439	43.8992	44.8644	43.0608	55.1668	56.8881	56.1785	60.7474	67.4204	104.576
ENSMUSG00000073680	FFI	SST	Tmem88b	320587	0.000427314	0.0156674	0.426584	36.5502	43.4599	34.184	47.3972	23.9988	27.6567	21.0523	42.003	55.6298	29.7657	39.0356	51.1574	57.0118	51.3283
ENSMUSG00000034353	FFI	SST	Ramp1	51801	0.000246394	0.0110445	0.426164	21.571	23.0194	24.3114	23.4259	23.2242	20.5102	15.8777	15.5195	22.3876	22.684	21.883	23.3399	30.4158	31.3896
ENSMUSG00000046056	FFI	SST	Sbsn	282619	0.000302341	0.0126888	0.425883	7.95128	9.2778	3.89881	3.61527	18.2541	1.71626	2.44965	1.66936	3.28734	11.6608	2.94456	5.69205	2.92471	12.4128
ENSMUSG00000021303	FFI	SST	Gng4	14706	0.00031257	0.0127931	0.425838	34.9795	40.534	34.4548	34.3589	47.4354	31.1078	34.9254	31.2598	64.7428	58.3742	53.6816	33.0707	47.5424	34.5778
ENSMUSG00000064341	FFI	SST	ND1	17716	0.000533038	0.0180556	0.425305	2090.9	650.181	877.06	2607.61	935.089	786.124	1212.71	1375.65	2547.73	1079.74	2629.63	2878.16	3314.83	947.936
ENSMUSG00000039001	FFI	SST	Rps21	66481	0.000121898	0.00675041	0.425116	643.971	732.801	821.594	967.019	891.811	657.88	587.718	519.421	708.146	872.906	948.817	825.119	682.379	867.95
ENSMUSG00000046364	FFI	SST	Rpl27a	26451	0.000256852	0.0113133	0.424875	345.24	410.764	428.367	358.685	391.468	322.262	244.953	256.634	342.351	454.798	368.144	352.505	340.481	549.206
ENSMUSG00000038668	FFI	SST	Lpar1	14745	0.000437678	0.0159036	0.424202	16.9817	16.8536	12.854	20.0965	7.28161	10.6874	11.8292	20.5641	29.0247	15.1913	20.7323	20.8134	27.8082	19.7668
ENSMUSG00000026353	FFI	SST	Ubxn4	67812	4.17279e-06	0.000596458	0.421749	63.0253	61.4517	53.1014	63.1205	46.8447	45.7124	47.7	56.4744	67.2492	68.0975	66.2667	63.9268	56.4525	58.8529
ENSMUSG00000018217	FFI	SST	Pmp22	18858	0.000403758	0.0151676	0.41954	22.1149	24.7565	24.055	29.9622	12.9879	18.7587	17.7239	28.2695	41.7828	23.8677	27.8226	33.4778	38.9995	27.1981
ENSMUSG00000032540	FFI	SST	Abhd5	67469	0.000468055	0.0165694	0.418878	13.9536	11.1111	11.3425	10.969	20.1488	7.55783	8.11926	6.57045	13.068	7.18795	10.7386	11.7593	14.6162	11.581
ENSMUSG00000033933	FFI	SST	Vhl	22346	1.91554e-05	0.00180557	0.417185	26.9168	27.8047	32.2854	28.7974	22.5496	25.0132	21.1932	25.5441	32.8825	27.5521	32.0655	30.8473	32.8646	29.5811
ENSMUSG00000008090	FFI	SST	Fgfrl1	116701	0.000502542	0.0172859	0.416228	7.83375	8.43526	6.82192	8.23145	9.01751	7.28923	6.85332	5.81368	12.567	7.52522	8.04862	11.7067	11.6654	10.4423
ENSMUSG00000050121	FFI	SST	Opalin	226115	0.000484531	0.016884	0.414878	12.1114	15.4082	11.2551	14.8435	8.33023	7.69957	6.4124	10.3326	14.1122	13.1786	8.16411	10.887	14.9467	12.5789
ENSMUSG00000047675	FFI	SST	Rps8	20116	0.000272314	0.0118381	0.413564	865.467	836.411	963.245	778.816	973.371	741.838	568.915	493.104	800.24	920.715	703.44	796.342	875.75	1036.49
ENSMUSG00000027569	FFI	SST	Mrgbp	73247	0.000169798	0.00871584	0.411761	13.6567	13.7567	12.72	16.8911	15.4154	9.72699	10.611	12.8888	16.1771	17.3669	13.1439	13.2701	13.8882	16.0799
ENSMUSG00000006390	FFI	SST	Elovl1	54325	0.000704393	0.0214652	0.408516	10.2964	12.5943	11.3342	10.2805	14.674	7.69175	5.58204	7.30722	9.3095	10.5407	7.67395	12.2682	13.2179	14.2131
ENSMUSG00000090137	FFI	SST	Uba52	22186	0.000225728	0.0104968	0.406011	960.575	1011.58	1124.16	1145.9	1035.31	899.423	865.979	631.952	966.56	1121.87	1217.2	1072.82	1014.05	1196.12
ENSMUSG00000049659	FFI	SST	Aftph	216549	8.72936e-05	0.00539361	0.405981	284.089	300.079	267.003	275.652	228.862	150.62	165.408	196.72	267.011	220.989	196.156	186.888	206.533	263.73
ENSMUSG00000039194	FFI	SST	Rlbp1	19771	0.000628413	0.0200309	0.404716	5.26255	5.82981	6.98639	6.13867	4.90124	5.81714	4.31499	3.77245	7.11864	6.26843	7.80632	5.98665	8.40347	7.15614
ENSMUSG00000030431	FFI	SST	Tmem238	664968	0.000406173	0.0151843	0.40346	2.2525	4.93919	4.89037	4.58826	2.22147	1.8236	1.18946	1.00029	3.44427	5.04721	2.55151	7.34221	2.05927	4.92
ENSMUSG00000026930	FFI	SST	Gpsm1	67839	0.000583339	0.0190348	0.40288	35.6854	43.4286	45.419	37.8466	53.5042	36.2579	30.8929	27.625	55.1291	63.6393	43.66	29.2286	46.7817	44.5383
ENSMUSG00000023022	FFI	SST	Lima1	65970	0.000757772	0.0225239	0.402642	5.38756	6.13408	7.20595	5.88133	8.91033	4.3335	4.81083	4.78445	8.07451	9.22968	6.56802	3.89981	9.85287	6.58226
ENSMUSG00000050621	FFI	SST	Rps27rt	100043813	0.000562339	0.0186691	0.401297	15.471	8.17455	5.24691	16.2086	14.8977	3.06238	7.82622	8.12096	11.129	11.613	16.5913	21.2723	12.8361	18.5488
ENSMUSG00000037805	FFI	SST	Rpl10a	19896	0.000344739	0.0136931	0.401162	331.122	318.667	348.314	327.72	326.233	277.683	295.123	190.444	317.366	362.192	341.353	335.076	357.871	414.632
ENSMUSG00000063320	FFI	SST	1190007I07Rik	544717	0.000877431	0.0252955	0.399721	9.55116	8.58235	8.80104	8.57643	10.6883	5.46819	8.83239	5.74964	11.1493	13.2214	9.01782	11.9582	13.8797	11.7273
ENSMUSG00000044881	FFI	SST	Coa4	68185	0.00092863	0.0263132	0.396918	14.1347	10.907	20.2269	17.3104	15.6535	12.7246	10.2023	5.1234	15.8649	13.8089	17.569	18.5232	18.795	15.1484
ENSMUSG00000025889	FFI	SST	Snca	20617	9.11555e-06	0.0010398	0.395826	172.671	162.308	150.868	202.045	141.55	153.708	181.286	196.403	217.868	201.25	230.114	218.104	241.372	207.722
ENSMUSG00000048163	FFI	SST	Selplg	20345	0.00094682	0.0266588	0.395402	7.61076	7.84219	9.21249	7.1995	5.93694	6.5425	5.34582	4.03496	7.87148	8.32109	6.60908	9.31856	12.7478	8.54343
ENSMUSG00000037563	FFI	SST	Rps16	20055	0.000641764	0.0202962	0.394398	473.804	533.235	595.942	452.567	589.382	456.313	318.341	270.087	458.968	554.248	512.861	487.522	419.773	601.679
ENSMUSG00000030701	FFI	SST	Plekhb1	27276	0.000483594	0.016884	0.393021	197.253	231.828	206.514	261.617	160.227	185.599	179.711	223.159	309.551	194.202	242.061	232.042	365.929	282.216
ENSMUSG00000050721	FFI	SST	Plekho2	102595	0.000910396	0.0259618	0.392845	4.74446	5.49222	6.31339	6.16096	4.30114	5.17112	4.354	2.6554	6.6862	6.23493	5.58807	5.982	7.73618	6.0489
ENSMUSG00000040483	FFI	SST	Xaf1	327959	0.000997007	0.0276633	0.392428	7.81888	9.39945	7.6911	8.74403	6.28257	6.5184	7.10907	4.32989	15.9577	6.13288	9.55735	11.1279	14.245	8.24533
ENSMUSG00000053398	FFI	SST	Phgdh	236539	0.000498068	0.0171763	0.391399	26.8197	35.0985	30.9055	30.4413	16.5402	25.709	23.3882	18.9595	33.9307	28.2425	25.1746	31.0996	36.9735	34.0789
ENSMUSG00000022112	FFI	SST	Gpc5	103978	0.000567402	0.0187905	0.391191	15.0867	12.3487	12.619	15.3496	10.1914	12.4619	8.95061	12.9821	18.927	13.7792	12.7929	16.9386	17.9017	15.5577
ENSMUSG00000063457	FFI	SST	Rps15	20054	0.00077244	0.022858	0.390866	1077.33	1096.12	1170.78	1308.17	1116.96	982.876	960.372	515.261	1086.93	1246.98	1359.78	1182.34	1164.72	1208.81
ENSMUSG00000042613	FFI	SST	Pbxip1	229534	0.000603297	0.0194483	0.39062	13.0592	16.1581	14.9771	13.063	11.0281	11.5824	8.4308	10.6575	15.3816	13.3386	10.6323	13.0096	18.7441	15.2775
ENSMUSG00000054675	FFI	SST	Tmem119	231633	0.0006899	0.0213322	0.390197	6.0267	8.03397	6.10786	7.54292	8.85809	5.77578	5.68643	7.45513	10.2095	8.74992	7.47874	6.97739	11.7301	8.56663
ENSMUSG00000033940	FFI	SST	Brk1	101314	8.9426e-05	0.00546899	0.389759	190.357	173.983	200.722	193.812	179.336	171.317	164.6	141.735	205.94	183.724	208.516	207.655	213.168	206.469
ENSMUSG00000015341	FFI	SST	Golga7	57437	0.000630113	0.0200309	0.388642	61.0944	45.8363	49.7643	69.5239	46.3068	49.7751	48.208	69.1336	95.387	58.9101	77.2779	74.3673	97.9523	60.6771
ENSMUSG00000015804	FFI	SST	Med28	66999	0.000371088	0.0142724	0.388591	120.53	103.152	125.185	113.864	123.531	103.11	102.447	72.5422	117.906	132.933	119.47	132.962	121.56	126.592
ENSMUSG00000028495	FFI	SST	Rps6	20104	0.000268654	0.0117843	0.388393	651.903	742.088	807.699	804.401	743.288	616.02	562.206	482.869	661.924	713.709	792.759	698.192	663.583	872.398
ENSMUSG00000052146	FFI	SST	Rps10	67097	0.000619463	0.0198258	0.388116	477.236	553.899	592.316	591.437	533.561	489.913	446.028	297.435	509.76	625.339	631.632	535.533	535.136	638.526
ENSMUSG00000057841	FFI	SST	Rpl32	19951	0.000417111	0.0154204	0.384389	393.449	447.58	470.164	505.872	453.407	388.932	344.398	302.579	416.87	459.056	504.613	453.453	394.025	551.719
ENSMUSG00000047797	FFI	SST	Gjb1	14618	0.00124348	0.0316104	0.382254	12.8405	21.5955	18.5118	21.1483	11.1916	13.7074	7.43556	10.1156	16.2823	14.0707	12.8544	19.5246	15.5712	25.1402
ENSMUSG00000025871	FFI	SST	4833439L19Rik	97820	7.10019e-05	0.00459338	0.382222	87.7616	87.8737	95.1885	100.841	74.0945	83.6464	77.849	87.7765	119.666	88.3672	99.0515	100.221	109.712	108.628
ENSMUSG00000036181	FFI	SST	H1f2	50708	0.0011842	0.0307994	0.381022	6.71491	5.07834	5.25755	7.45698	6.96406	5.12921	4.37738	4.08411	6.76172	6.1401	9.05497	5.49254	7.92688	6.5083
ENSMUSG00000045128	FFI	SST	Rpl18a	76808	0.000532208	0.0180556	0.379676	749.386	704.078	771.79	867.677	654.846	654.938	722.055	466.159	721.551	856.653	886.79	795.275	834.918	877.906
ENSMUSG00000038375	FFI	SST	Trp53inp2	68728	0.000457525	0.0163266	0.379106	95.2629	107.37	99.2973	104.309	87.951	93.8758	87.2978	114.211	144.814	101.609	125.904	110.974	171.318	125.579
ENSMUSG00000015950	FFI	SST	Ncf1	17969	0.00133167	0.0330344	0.378924	2.58167	2.20052	2.66498	2.07167	4.52383	1.63949	1.28643	1.77561	2.45211	3.20032	1.86473	2.10033	3.05528	2.82779
ENSMUSG00000030703	FFI	SST	Gdpd3	68616	0.000979361	0.0272872	0.378355	24.1969	29.9024	33.0849	27.4614	38.3123	28.3004	20.1784	17.9318	29.4225	37.3651	33.7771	27.0238	30.7184	32.7431
ENSMUSG00000015090	FFI	SST	Ptgds	19215	0.000233358	0.0107415	0.377983	680.365	814.339	893.519	951.875	686.701	607.219	467.569	512.768	665.168	682.291	730.222	675.143	592.899	740.111
ENSMUSG00000028218	FFI	SST	Cibar1	68099	0.000308262	0.0127931	0.377717	71.1172	57.0424	58.6326	74.5622	47.1188	52.1908	49.1831	47.9993	57.6421	59.4246	72.5123	67.5802	59.1045	71.0677
ENSMUSG00000032060	FFI	SST	Cryab	12955	0.00105449	0.0285727	0.376129	37.2008	46.3504	55.0386	55.6711	29.1224	43.1544	28.6549	36.0928	48.3905	38.559	48.369	57.1145	56.0905	58.8654
ENSMUSG00000045503	FFI	SST	Sys1	66460	0.000588269	0.0191023	0.375834	38.237	41.3186	53.4097	38.8041	28.9507	39.8184	32.1265	28.9082	45.7108	48.8709	42.9805	42.0844	39.703	51.5503
ENSMUSG00000031826	FFI	SST	Usp10	22224	0.000332254	0.0133562	0.375728	64.7997	70.2404	84.5358	71.1428	104.263	55.0701	58.6076	60.325	78.6084	78.6775	71.5209	80.0776	57.4351	82.4773
ENSMUSG00000025351	FFI	SST	Cd63	12512	0.000957242	0.0267973	0.375146	45.3579	49.6829	50.1282	53.9751	51.1419	44.1029	40.5393	29.8374	57.0113	48.4167	57.2326	61.8263	52.7463	44.2013
ENSMUSG00000057572	FFI	SST	Zbtb8os	67106	0.000907198	0.025926	0.373633	71.4433	77.2318	77.0816	78.1512	91.1714	55.2886	54.4257	46.5725	60.4691	60.3477	75.5122	77.2373	68.9836	88.1653
ENSMUSG00000062006	FFI	SST	Rpl34	68436	0.000570423	0.0188437	0.373299	222.767	214.389	235.253	283.235	240.578	186.938	224.17	162.97	228.283	234.666	304.146	243.49	240.082	270.232
ENSMUSG00000019823	FFI	SST	Mical1	171580	0.00142265	0.0345212	0.372585	9.70212	16.0302	16.6568	10.67	29.9301	9.3741	7.69926	10.8646	15.7381	30.5019	9.90462	9.12068	15.0105	20.4703
ENSMUSG00000041571	FFI	SST	Selenow	20364	0.0012311	0.0314154	0.370415	949.337	1000.82	1133.77	1169.75	963.494	934.915	868.975	501.517	953.45	1208.89	1138.45	964.178	1119.49	1236.09
ENSMUSG00000049775	FFI	SST	Tmsb4x	19241	0.000138528	0.00751544	0.368848	3536.26	3070.71	1731.41	1676.72	1826.18	1457.44	1428.67	1364.84	1535.47	1850.36	1903.84	1852.83	1656.51	1793.46
ENSMUSG00000031665	FFI	SST	Sall1	58198	0.00163666	0.0374022	0.36871	4.96562	5.01614	4.68066	5.91527	3.77935	3.53149	4.08038	5.51683	9.4009	7.90276	7.27487	4.07147	8.14795	4.34913
ENSMUSG00000033577	FFI	SST	Myo6	17920	0.0011148	0.0297563	0.368346	58.994	55.2462	53.8469	58.5404	54.9872	48.2673	40.2055	55.8567	73.3194	70.8355	53.5029	45.6804	92.5153	62.5479
ENSMUSG00000020261	FFI	SST	Slc36a1	215335	0.000221072	0.0103524	0.367682	183.355	180.616	184.745	168.481	164.514	149.485	145.4	135.728	181.123	195.905	189.761	184.322	147.91	184.707
ENSMUSG00000040795	FFI	SST	Iqcc	230767	0.00157603	0.0366989	0.367115	32.6381	43.2761	42.0535	37.8752	50.5683	35.4224	39.1253	23.7855	40.4459	53.532	41.066	48.7823	44.246	64.7035
ENSMUSG00000079641	FFI	SST	Rpl39	67248	0.000599127	0.0193606	0.366442	182.81	237.865	240.671	245.398	276.898	194.39	162.286	194.805	212.045	229.69	277.659	256.225	198.582	257.315
ENSMUSG00000037742	FFI	SST	Eef1a1	13627	9.99306e-05	0.00586652	0.365761	2195.87	2223.75	2177.2	2036.91	2347.05	1798.29	1868.63	1543.75	2269.89	2023.89	2143.56	2024.37	2229.73	2201.69
ENSMUSG00000032966	FFI	SST	Fkbp1a	14225	0.000147594	0.00781854	0.365477	413.764	400.524	394.436	418.673	389.392	375.872	378.183	341.848	426.293	421.373	471.64	480.855	439.555	481.112
ENSMUSG00000024962	FFI	SST	Vegfb	22340	0.000700943	0.0214559	0.365438	134.279	138.596	152.849	126.074	139.636	132.442	110.638	99.4679	142.67	148.084	129.572	149.317	151.234	181.329
ENSMUSG00000050608	FFI	SST	Micos10	433771	0.00108394	0.0290486	0.364893	175.299	207.445	206.631	183.655	221.495	176.944	144.6	116.407	166.879	195.586	211.581	213.88	184.219	222.556
ENSMUSG00000073155	FFI	SST	1810058I24Rik	67705	0.00068222	0.0212235	0.364593	31.0554	40.1085	42.1873	29.9822	30.1664	27.2718	20.7418	25.2969	33.0889	28.1548	30.1526	28.8174	35.2826	36.0977
ENSMUSG00000050854	FFI	SST	Tmem125	230678	0.00168554	0.0381923	0.363163	8.99074	13.3807	10.7023	10.2739	3.00328	7.37522	4.93744	7.18909	12.0013	7.83709	7.8754	9.90116	10.8411	8.57534
ENSMUSG00000024666	FFI	SST	Tmem138	72982	0.00129645	0.0324622	0.361554	9.52901	14.1994	13.3448	11.6939	15.5925	10.3994	11.3135	9.62878	11.9038	14.4655	14.726	15.2359	12.6636	16.5719
ENSMUSG00000028273	FFI	SST	Pdlim5	56376	0.00186947	0.0407275	0.360981	6.49892	4.3487	5.25364	7.22054	5.93362	3.40082	5.05591	6.45295	8.71436	5.4789	7.25259	8.15499	9.13557	5.22192
ENSMUSG00000030342	FFI	SST	Cd9	12527	0.00190997	0.0411052	0.360963	16.2982	16.7313	11.2346	18.9717	16.4055	9.78013	9.29098	22.1654	23.299	18.3984	20.5942	16.9686	22.9644	20.9047
ENSMUSG00000030428	FFI	SST	Ttyh1	57776	0.000736851	0.022237	0.360956	223.241	233.967	242.645	202.899	222.154	196.31	176.78	154.138	236.873	270.958	177.265	227.573	246.164	217.513
ENSMUSG00000078427	FFI	SST	Sarnp	66118	0.000577748	0.0188986	0.360375	70.2109	77.7451	68.7866	77.8639	98.9987	55.4533	56.5084	66.2653	84.3601	74.0629	73.5441	69.5374	62.1505	90.5535
ENSMUSG00000027239	FFI	SST	Mdk	17242	0.00190084	0.0410697	0.360174	6.60221	7.22085	7.39221	9.08719	1.72852	7.23259	6.38243	4.35709	9.6705	11.2283	9.26955	11.7996	12.3388	7.57665
ENSMUSG00000027533	FFI	SST	Fabp5	16592	0.000529041	0.0180117	0.359882	107.784	98.6862	91.3971	118.811	89.8335	90.5954	97.5606	81.0001	104.918	99.2301	118.082	124.804	120.371	118.95
ENSMUSG00000040952	FFI	SST	Rps19	20085	0.00156314	0.0365042	0.357829	534.565	671.246	627.515	469.433	632.732	501.09	314.441	355.98	534.467	615.511	437.942	498.759	485.156	682.199
ENSMUSG00000063015	FFI	SST	Ccni	12453	0.00191574	0.0411052	0.357392	141.813	90.3392	98.8565	165.412	92.8595	88.891	113.146	117.764	167.257	100.206	185.474	178.303	185.01	102.217
ENSMUSG00000062997	FFI	SST	Rpl35	66489	0.002136	0.0438434	0.356408	226.597	323.689	365.257	236.085	338.951	246.466	155.811	185.402	218.729	356.164	259.621	276.979	234.268	500.752
ENSMUSG00000057789	FFI	SST	Bak1	12018	0.00191911	0.0411115	0.355633	9.66499	9.81311	10.3526	8.44203	12.4813	7.68552	7.85709	5.15279	10.6076	11.315	8.43101	7.91092	10.2104	11.2026
ENSMUSG00000025794	FFI	SST	Rpl14	67115	0.000692106	0.0213322	0.355537	536.885	524.715	593.572	511.53	558.801	475.423	353.782	380.284	514.218	501.109	472.866	535.746	482.957	589.782
ENSMUSG00000021286	FFI	SST	Zfyve21	68520	0.00137695	0.033719	0.354664	11.0487	11.7725	9.98473	11.8527	15.0716	9.20405	8.58117	9.66614	11.7629	13.6642	11.0697	11.8845	14.3222	10.6971
ENSMUSG00000073982	FFI	SST	Rhog	56212	0.0016769	0.0380611	0.354008	42.3921	54.6696	51.6741	50.0517	38.4186	39.3842	31.718	33.8839	55.9327	37.9299	37.623	42.5718	58.1626	56.2573
ENSMUSG00000004558	FFI	SST	Ndrg2	29811	0.000376824	0.0144514	0.353746	413.797	520.979	555.662	562.057	459.518	436.578	374.006	423.152	535.348	458.149	451.198	457.87	589.748	578.868
ENSMUSG00000040681	FFI	SST	Hmgn1	15312	0.0020438	0.0427533	0.353356	39.7302	48.9264	51.4976	44.719	41.57	43.4831	36.4235	39.0933	49.2817	62.5394	51.8529	44.7473	44.7982	86.6947
ENSMUSG00000018102	FFI	SST	H2bc4	68024	0.00212826	0.0437906	0.352971	8.59163	5.55439	6.60809	11.6804	8.33458	6.47777	8.74443	6.64536	10.1669	10.0692	10.7413	10.3697	13.3971	8.32999
ENSMUSG00000061740	FFI	SST	Cyp2d22	56448	0.00151937	0.0360169	0.352452	8.96093	10.143	8.11927	9.68586	5.97504	6.78474	7.62979	8.65821	12.1663	11.1597	7.72784	9.09222	12.2539	9.15642
ENSMUSG00000017009	FFI	SST	Sdc4	20971	0.00139433	0.0339025	0.352097	13.4723	19.0366	18.0212	24.3235	12.113	15.8482	14.4745	13.362	20.6801	15.3302	16.7162	18.8556	21.7234	22.8985
ENSMUSG00000030035	FFI	SST	Wbp1	22377	0.00155541	0.0364823	0.352073	36.3444	34.4527	40.2322	33.6021	40.5771	34.3776	28.832	21.9825	43.7239	37.4724	35.4749	34.7679	43.7147	36.1606
ENSMUSG00000031604	FFI	SST	Msmo1	66234	0.00145365	0.0351456	0.350915	69.1618	67.2225	59.4619	72.891	50.2833	58.7867	55.7953	67.9249	85.0333	58.4114	87.8579	94.157	88.9655	66.1695
ENSMUSG00000002985	FFI	SST	Apoe	11816	0.00199387	0.0419992	0.350719	621.657	554.191	623.391	818.326	577.2	597.787	620.589	329.702	739.204	737.739	689.056	687.382	857.431	639.99
ENSMUSG00000029864	FFI	SST	Gstk1	76263	0.00233286	0.0470308	0.350601	5.74608	4.9052	8.39703	7.67835	6.79769	5.23976	5.11762	3.2045	8.63395	7.78131	5.76794	6.4471	8.25463	8.75691
ENSMUSG00000054808	FFI	SST	Actn4	60595	0.00228291	0.0464448	0.350477	92.073	104.764	115.1	59.5841	145.125	84.2431	75.3681	72.8038	120.114	150.434	84.161	63.4881	139.249	120.279
ENSMUSG00000032841	FFI	SST	Prr5l	72446	0.00205678	0.0428234	0.348828	8.43062	8.58505	6.99473	8.78879	6.40931	5.0542	4.70201	6.66168	8.41137	6.19572	5.49984	8.63653	8.36737	7.75068
ENSMUSG00000025967	FFI	SST	Eef1b2	55949	0.00153005	0.0361282	0.348498	445.542	503.578	507.917	392.076	482.598	366.122	260.033	390.098	407.617	453.697	401.089	407.921	404.191	597.461
ENSMUSG00000014504	FFI	SST	Srp19	66384	0.000748621	0.0224016	0.346677	90.452	89.9756	94.8866	108.799	72.6744	80.7692	94.9754	76.6134	95.4604	104.264	111.884	108.341	97.1505	116.14
ENSMUSG00000064370	FFI	SST	CYTB	17711	0.00256098	0.0498961	0.346458	1843.31	913.269	906.705	2478.78	1336.47	924.313	1075.85	1592.67	2026.92	1245.85	2293.71	2336.68	2774.8	916.309
ENSMUSG00000001018	FFI	SST	Snapin	20615	0.00116185	0.0304639	0.346402	60.7589	49.195	43.9122	60.2642	48.3413	42.4943	46.4509	53.9338	72.3192	50.0451	58.2481	67.0566	66.5613	49.8312
ENSMUSG00000006333	FFI	SST	Rps9	76846	0.000957765	0.0267973	0.346365	497.391	544.287	628.414	572.865	560.569	506.908	446.152	360.254	540.038	592.857	588.458	532.019	506.712	594.468
ENSMUSG00000074211	FFI	SST	Sdhaf1	68332	0.000894262	0.0256112	0.346152	9.93553	11.4388	11.912	9.35148	14.2737	9.77356	10.3055	9.24991	12.6357	12.6342	10.6357	12.4799	12.0922	13.6956
ENSMUSG00000044502	FFI	SST	Bod1	69556	0.00044931	0.016163	0.345259	133.547	142.847	147.004	130.192	113.494	128.961	114.891	109.054	140.547	150.017	137.018	134.19	143.154	166.543
ENSMUSG00000028234	FFI	SST	Rps20	67427	0.00254971	0.049895	0.345147	256.417	291.353	313.315	241.246	362.096	244.37	132.571	226.088	252.195	321.127	234.162	281.375	239.959	388.99
ENSMUSG00000040249	FFI	SST	Lrp1	16971	0.0018251	0.0404615	0.344866	1761.74	1629.89	1710.94	1627.62	1912.21	1785.94	1516.58	1303.28	1708.5	2231.06	2279.09	2442.34	1765.63	1831.25
ENSMUSG00000026701	FFI	SST	Prdx6	11758	0.00149302	0.035838	0.344155	217.187	233.546	239.779	255.812	264.815	195.085	152.565	187.583	232.039	172.07	221.979	220.303	291.98	250.093
ENSMUSG00000022132	FFI	SST	Cldn10	58187	0.00255853	0.0498961	0.343265	17.8393	18.7261	15.9691	18.8401	17.2577	13.7034	10.571	18.3231	21.1456	17.9491	20.1533	20.5303	24.8748	13.7691
ENSMUSG00000047215	FFI	SST	Rpl9	20005	0.000822038	0.024165	0.342861	757.117	823.621	912.523	868.076	826.359	775.042	573.556	668.125	775.524	843.362	919.438	736.151	819.936	958.427
ENSMUSG00000020738	FFI	SST	Sumo2	170930	0.00157839	0.0366989	0.342479	237.845	151.914	164.17	237.625	149.27	155.606	187.862	206.554	254.392	199.9	271.726	261.175	256.153	171.582
ENSMUSG00000022472	FFI	SST	Desi1	28075	0.000300904	0.0126684	0.34213	87.885	103.262	104.552	99.9001	84.0761	88.9618	85.4206	83.9673	107.856	97.2251	96.9974	91.8303	117.379	116.364
ENSMUSG00000008683	FFI	SST	Rps15a	267019	0.00199832	0.0419992	0.341314	298.982	306.7	306.478	399.125	291.508	248.927	248.959	209.365	303.589	256.845	435.721	304.159	294.517	279.619
ENSMUSG00000041126	FFI	SST	H2az2	77605	0.00106954	0.0288364	0.340611	49.1469	34.9065	57.6254	43.557	40.4376	40.1506	40.0864	38.8593	45.3987	44.9245	53.0708	54.4366	46.4635	54.8714
ENSMUSG00000027562	FFI	SST	Car2	12349	0.00225969	0.0461129	0.340272	186.408	203.385	193.763	222.185	148.75	161.719	150.407	237.608	302.233	186.102	199.046	237.95	305.797	224.998
ENSMUSG00000043716	FFI	SST	Rpl7	19989	0.000544416	0.0183017	0.33689	494.737	515.741	498.751	540.44	541.791	457.737	433.926	368.574	513.212	475.172	540.164	497.263	524.279	532.954
ENSMUSG00000030983	FFI	SST	Bccip	66165	7.44678e-05	0.00468796	0.336201	103.136	99.9189	102.2	100.546	115.368	78.256	80.9491	85.7213	88.8163	104.025	99.1784	91.3578	97.4819	95.2948
ENSMUSG00000017404	FFI	SST	Rpl19	19921	0.00251923	0.049635	0.336142	930.128	1056.77	1145.63	1115.66	1064.51	947.742	901.849	570.75	945.342	1151.03	1139.04	1024.66	998.947	1252.49
ENSMUSG00000064358	FFI	SST	COX3	17710	0.000779867	0.0230268	0.333288	1514.8	441.83	619.553	2904.28	1065.41	283.134	869.802	531.152	2861.07	990.304	2478.64	2739.09	2303.86	507.032
ENSMUSG00000063480	FFI	SST	Snu13	20826	0.00153219	0.0361282	0.332793	144.664	146.262	156.168	157.514	174.999	130.69	103.119	160.463	166.733	149.886	173.812	187.71	151.83	151.627
ENSMUSG00000048450	FFI	SST	Msx1	17701	0.00156454	0.0365042	0.332758	1.80544	0.732051	1.10768	1.17934	1.01023	1.04154	0.527717	0.690698	2.34085	1.89094	0.86981	1.65632	1.65313	2.64381
ENSMUSG00000042747	FFI	SST	Krtcap2	66059	0.00161989	0.0371872	0.332359	73.4877	93.3617	74.2358	62.2479	57.2721	72.8293	53.2109	65.0844	77.236	79.2733	72.9976	87.8732	79.6868	84.6441
ENSMUSG00000027777	FFI	SST	Schip1	30953	0.00126404	0.0318299	0.332329	107.666	91.2769	88.8912	117.534	77.9173	83.9204	94.6102	124.708	137.059	109.711	134.544	130.128	132.685	101.852
ENSMUSG00000031458	FFI	SST	Coprs	66423	0.00138446	0.0337789	0.332247	124.639	134.759	143	127.374	104.152	116.753	104.524	97.2965	120.643	137.657	130.749	141.572	118.542	147.594
ENSMUSG00000030122	FFI	SST	Ptms	69202	0.00126077	0.0318299	0.332178	767.268	820.246	846.097	711.463	841.172	793.083	731.72	643.987	808.676	1015.79	771.094	873.522	928.68	1010.74
ENSMUSG00000021018	FFI	SST	Polr2h	245841	0.00183554	0.0406255	0.331936	55.0664	62.6917	70.6586	74.4743	76.2674	57.0034	62.3022	54.0147	71.4768	63.8965	72.3334	67.3697	71.8539	93.0559
ENSMUSG00000015806	FFI	SST	Qdpr	110391	0.00130746	0.0326767	0.331816	284.009	325.472	319.748	364.628	235.569	284.94	223.334	280.127	343.504	262.79	310.506	328.472	386.559	326.146
ENSMUSG00000022427	FFI	SST	Tomm22	223696	0.000381358	0.0145417	0.329477	121.892	126.953	127.459	132.796	127.994	123.725	117.599	115.856	135.418	140.384	139.436	140.358	139.789	157.873
ENSMUSG00000021124	FFI	SST	Vti1b	53612	0.00085707	0.0248123	0.32917	248.663	256.971	245.639	241.14	298.128	211.875	184.757	193.713	236.574	204.776	247.136	260.362	242.914	243.719
ENSMUSG00000000346	FFI	SST	Dazap2	23994	0.00103466	0.0283543	0.329049	73.4906	65.0659	62.2731	71.9319	62.8746	66.669	57.9073	69.9505	86.4555	70.179	79.5483	88.0539	81.9944	68.3427
ENSMUSG00000021306	FFI	SST	Gpr137b	83924	0.00114339	0.0302173	0.329042	19.8225	17.7562	18.124	21.7109	17.3434	15.1661	16.4559	19.6573	23.7153	17.4775	20.0062	19.0461	21.5487	23.3939
ENSMUSG00000021252	FFI	SST	Erg28	58520	0.00137246	0.0336708	0.328756	47.9423	47.2616	48.7354	55.0268	38.5493	46.9624	39.9439	53.3046	55.2593	49.5642	61.4738	60.4492	55.4568	62.7344
ENSMUSG00000009013	FFI	SST	Dynll1	56455	0.0016998	0.03832	0.328172	467.395	391.816	413.103	463.84	429.116	416.254	397.727	390.736	439.729	528.718	564.682	583.415	458.841	428.68
ENSMUSG00000062647	FFI	SST	Rpl7a	27176	0.00169236	0.038217	0.327947	529.532	522.84	532.406	560.895	515.632	464.8	486.385	353.957	481.486	579.351	556.215	555.876	520.977	577.812
ENSMUSG00000025400	FFI	SST	Tac2	21334	0.00248444	0.049268	0.326195	45.2201	55.6837	51.2068	38.9899	51.5404	47.465	43.8654	49.3515	65.0745	67.6533	68.0837	45.9412	65.1249	47.966
ENSMUSG00000047843	FFI	SST	Bri3	55950	0.00126375	0.0318299	0.326188	108.454	91.0022	107.842	83.0085	78.4889	87.0091	73.0642	82.9301	96.8422	110.949	88.8936	100.155	90.9351	107.839
ENSMUSG00000021262	FFI	SST	Evl	14026	0.000313354	0.0127931	0.326124	315.252	231.685	255.168	273.602	270.656	236.487	274.431	245.207	309.366	272.796	289.171	298.856	331.126	287.265
ENSMUSG00000010054	FFI	SST	Tusc2	80385	0.0013528	0.0333723	0.325756	116.564	128.789	151.866	123.856	135.136	120.287	108.581	106.7	129.987	134.203	128.372	127.04	134.051	171.705
ENSMUSG00000030638	FFI	SST	Sh3gl3	20408	0.000325851	0.0132183	0.32442	49.8378	50.4351	45.09	45.4745	44.1316	39.8773	44.6239	42.8991	56.4684	49.4242	48.0925	48.4144	51.4158	46.8873
ENSMUSG00000040289	FFI	SST	Hey1	15213	0.00139461	0.0339025	0.323404	32.97	26.1519	25.4036	33.7882	26.5662	21.7943	28.5453	26.6211	32.5875	26.3435	31.4295	33.8413	32.8384	30.0795
ENSMUSG00000031029	FFI	SST	Eif3f	66085	0.000961438	0.0268438	0.322112	109.894	127.22	127.339	101.254	108.941	100.832	89.4483	91.0417	111.695	123.244	99.6098	107.683	107.645	128.724
ENSMUSG00000047044	FFI	SST	D030056L22Rik	225995	0.00240259	0.0481493	0.321577	27.3737	17.4409	17.396	27.8255	17.4699	19.1843	22.2822	27.2287	31.7761	23.6655	32.136	29.3504	29.3235	24.3522
ENSMUSG00000035212	FFI	SST	Leprot	230514	0.00186289	0.0407275	0.320526	23.7458	24.3992	26.1272	25.1665	13.0612	19.9176	17.6215	19.984	22.5875	25.1475	25.4205	25.2961	23.7208	19.3286
ENSMUSG00000024844	FFI	SST	Banf1	23825	0.00198939	0.0419992	0.319571	82.4111	88.4257	106.112	73.0749	85.1561	84.9412	77.1064	65.4241	87.641	98.3077	88.1258	94.7606	91.5928	102.991
ENSMUSG00000021131	FFI	SST	Erh	13877	0.00185177	0.0407275	0.319567	130.354	134.259	123.9	142.932	153.184	98.5242	114.424	94.3591	125.51	108.687	145.168	134.629	122.598	117.278
ENSMUSG00000035268	FFI	SST	Pkig	18769	0.00115553	0.0303578	0.319239	63.3255	60.4619	59.5334	67.4437	57.6006	58.4663	57.3075	54.1825	68.4642	72.6854	72.3987	63.5917	75.6708	57.7622
ENSMUSG00000047067	FFI	SST	Dusp28	67446	0.00252155	0.049635	0.318473	56.3968	55.7096	57.859	49.057	59.4473	50.3112	42.743	37.6618	52.8844	55.9272	49.5117	52.3249	53.8809	63.2164
ENSMUSG00000020864	FFI	SST	Ankrd40	71452	0.00121102	0.0311411	0.317771	73.8439	79.9173	86.2288	73.8283	63.3123	74.4513	68.1705	72.7601	97.7981	85.7774	74.7179	70.5298	94.6353	95.5395
ENSMUSG00000090000	FFI	SST	Ier3ip1	66191	0.00151294	0.0359729	0.317377	71.6937	63.0356	66.0681	74.8906	68.0171	74.9393	64.2462	64.0108	87.9737	78.8485	81.7967	88.2079	83.2022	72.7694
ENSMUSG00000037353	FFI	SST	Letmd1	68614	0.00126369	0.0318299	0.316962	36.81	36.4834	37.4458	38.4663	35.5392	30.7685	32.6551	28.6563	38.9304	40.717	37.5367	31.8166	41.1781	32.0496
ENSMUSG00000075701	FFI	SST	Selenos	109815	0.00199728	0.0419992	0.31682	38.4032	44.5427	47.7509	44.6298	41.2421	32.6362	40.8545	36.7313	41.0625	45.7739	43.7738	41.4079	42.6859	54.0514
ENSMUSG00000044533	FFI	SST	Rps2	16898	0.00212004	0.0437474	0.316692	492.214	544.585	580.092	508.719	563.433	509.964	452.687	374.118	500.189	600.985	515.701	551.286	548.86	582.344
ENSMUSG00000039105	FFI	SST	Atp6v1g1	66290	0.00212083	0.0437474	0.316625	232.075	185.208	183.437	239.077	147.687	173.005	194.097	187.095	229.877	216.776	266.107	247.44	220.823	174.599
ENSMUSG00000021610	FFI	SST	Clptm1l	218335	0.00035419	0.0139347	0.312724	140.822	152.225	147.117	150.885	146.311	129.001	117.179	140.92	141.914	146.17	146.561	156.262	154.257	151.888
ENSMUSG00000028394	FFI	SST	Pole3	59001	0.00135804	0.0334398	0.311544	32.2002	35.5575	34.195	36.1244	25.1139	26.0491	31.9165	28.7899	40.1404	34.5981	34.1144	31.0984	36.0687	30.7077
ENSMUSG00000072694	FFI	SST	1500011B03Rik	66236	0.000287436	0.0124146	0.310765	269.231	249.241	247.159	239.58	214.06	208.511	242.761	234.436	269.76	263.025	244.65	273.071	262.285	268.283
ENSMUSG00000022296	FFI	SST	Baalc	118452	0.00213862	0.0438434	0.308667	125.593	124.877	121.786	126.929	94.7941	106.992	101.056	119.961	157.907	113.158	122.747	121.039	157.057	116.745
ENSMUSG00000031839	FFI	SST	Hsbp1	68196	0.00150506	0.0358688	0.30748	294.39	297.567	315.227	303.86	288.045	294.188	288.857	274.658	294.589	381.62	334.97	347.945	317.452	359.268
ENSMUSG00000032399	FFI	SST	Rpl4	67891	0.00154222	0.0362368	0.304968	737.882	813.058	831.318	788.883	764.052	684.79	681.879	580.598	754.667	798.849	777.375	674.659	746.2	870.066
ENSMUSG00000025404	FFI	SST	R3hdm2	71750	0.000431366	0.0157726	0.30262	150.187	141.501	156.114	141.53	170.379	123.299	122.798	161.556	151.384	163.492	147.635	142.208	167.743	158.897
ENSMUSG00000042406	FFI	SST	Atf4	11911	0.00113563	0.0301389	0.301198	178.171	198.248	197.879	158.801	178.529	174.102	177.963	176.545	202.01	235.745	192.076	171.262	206.611	225.692
ENSMUSG00000019804	FFI	SST	Snx3	54198	0.00138318	0.0337789	0.300921	241.579	200.257	208.944	210.997	198.381	194.004	192.954	199.963	223.23	205.564	234.414	255.338	238.357	212.842
ENSMUSG00000020107	FFI	SST	Anapc16	52717	0.00123951	0.0315697	0.298077	45.913	43.7021	37.6655	50.7194	52.2442	47.1483	45.3883	45.6775	52.2447	54.7954	52.0307	55.8091	57.3195	49.1491
ENSMUSG00000003038	FFI	SST	Hmgn2	15331	0.0014757	0.0356142	0.297561	82.487	79.0593	78.2394	100.008	91.7779	70.7914	85.4253	87.9034	93.2684	95.5132	93.9659	101.773	86.2951	94.3602
ENSMUSG00000058600	FFI	SST	Rpl30	19946	0.00190195	0.0410697	0.296949	273.354	287.58	298.09	334.583	377.415	264.895	228.432	272.326	300.501	307.734	342.415	294.074	273.822	273.132
ENSMUSG00000035953	FFI	SST	Pip4p1	219024	0.00198494	0.0419992	0.296234	91.061	103.618	93.0391	93.9439	118.42	85.388	78.8706	75.0389	92.5488	100.715	92.0336	98.3825	86.4051	91.5728
ENSMUSG00000030868	FFI	SST	Dctn5	59288	0.00170722	0.0384226	0.290686	110.884	105.868	100.53	106.113	74.8	98.7671	111.542	93.0407	109.605	116.618	120.634	116.494	119.475	119.031
ENSMUSG00000059436	FFI	SST	Max	17187	0.00176713	0.0395045	0.288197	49.2231	37.1202	41.5935	54.3945	38.4592	41.8386	50.6658	50.3733	61.5202	49.6691	58.405	49.7184	54.7926	53.8547
ENSMUSG00000052142	FFI	SST	Rasal3	320484	0.00137005	0.0336708	0.281027	1.39972	1.07515	2.25237	0.725133	3.7362	0.584334	0.933995	0	3.23837	2.3735	2.0633	1.26459	1.06898	2.79644
ENSMUSG00000025025	FFI	SST	Mxi1	17859	0.00248414	0.049268	0.280104	66.3163	55.2575	61.9988	61.9277	62.6936	53.7362	56.0189	65.9753	73.9037	68.633	62.1745	53.2662	72.4663	70.8135
ENSMUSG00000024248	FFI	SST	Cox7a2l	20463	0.0025371	0.0498038	0.278906	318.658	298.474	320.683	309.516	313.601	284.945	260.21	250.714	309.545	285.062	294.147	285.227	317.539	333.396
ENSMUSG00000021792	FFI	SST	Prxl2a	70564	0.00191544	0.0411052	0.277419	125.335	127.77	127.27	144.742	121.348	122.957	124.467	120.865	145.027	127.105	129.865	138.206	149.703	145.403
ENSMUSG00000051359	FFI	SST	Ncald	52589	0.00190485	0.0410697	0.269312	285.324	281.447	281.24	273.912	238.434	241.945	271.68	240.648	274.292	271.192	276.513	267.658	298.983	302.014
ENSMUSG00000038965	FFI	SST	Ube2l3	22195	0.00232716	0.0469878	0.253008	140.447	132.464	133.826	141.447	108.909	128.068	132.54	134.719	149.104	133.163	148.743	145.823	152.907	137.516
ENSMUSG00000030302	FFI	SST	Atp2b2	11941	0.00186693	0.0407275	-0.241208	146.532	168.34	161.582	158.105	135.213	174.014	175.897	195.718	124.11	136.801	140.239	119.845	132.475	135.935
ENSMUSG00000033389	FFI	SST	Arhgap44	216831	0.00114761	0.0302689	-0.245213	128.067	143.187	139.976	129.383	117.187	141.376	142.274	158.445	110.878	105.947	109.93	93.9636	108.447	110.331
ENSMUSG00000027419	FFI	SST	Pcsk2	18549	0.00148661	0.0358129	-0.252903	200.784	207.172	207.888	190.58	177.845	225.938	236.166	248.031	162.613	168.767	177.585	149.414	187.793	170.402
ENSMUSG00000015709	FFI	SST	Arnt2	11864	0.00255407	0.0498961	-0.254634	116.855	115.663	106.141	93.6989	99.7494	124.637	152.444	141.123	100.054	106.413	101.348	88.1171	105.611	92.2173
ENSMUSG00000042350	FFI	SST	Arel1	68497	0.00113591	0.0301389	-0.255574	63.3005	67.5374	66.1155	58.8887	50.244	70.1689	74.8562	84.5082	57.4414	57.8741	56.3905	47.1713	56.7128	52.1616
ENSMUSG00000000374	FFI	SST	Trappc10	216131	0.00190348	0.0410697	-0.261191	45.1803	53.5799	45.7947	47.706	34.2623	51.3554	56.8664	58.0156	39.6777	40.9776	40.4643	33.6255	37.6372	42.2625
ENSMUSG00000036333	FFI	SST	Kidins220	77480	0.00119456	0.0309564	-0.2617	138.261	128.694	120.966	130.896	131.992	158.423	180.795	188.766	125.828	132.86	127.439	120.188	130.771	110.548
ENSMUSG00000078716	FFI	SST	Tmem8b	242409	0.00152752	0.0361282	-0.263699	49.1815	53.7921	52.7712	44.269	40.9986	54.6753	59.6404	62.6368	39.6941	42.9252	40.327	36.7832	46.821	43.0087
ENSMUSG00000027429	FFI	SST	Sec23b	27054	0.00246404	0.0490821	-0.264043	30.1841	33.026	29.8203	32.1683	32.2295	39.697	39.7769	41.0774	29.3279	26.5724	30.3202	25.1414	28.9511	28.855
ENSMUSG00000041530	FFI	SST	Ago1	236511	0.00187067	0.0407275	-0.272976	25.4653	27.5061	25.6567	26.8027	27.1759	30.25	31.6818	39.6775	24.6414	21.6353	24.9709	20.8501	25.2348	23.2065
ENSMUSG00000020952	FFI	SST	Scfd1	76983	0.00188804	0.0409752	-0.277565	47.9934	49.4373	50.5134	41.2796	35.0097	47.0454	49.6415	64.3651	39.7307	36.6519	37.198	34.0882	38.3614	34.8893
ENSMUSG00000020262	FFI	SST	Adarb1	110532	0.0015963	0.0369223	-0.278165	110.313	111.597	121.76	109.558	102.291	135.08	151.255	136.447	99.5591	105.432	100.343	80.2722	102.81	97.9906
ENSMUSG00000007880	FFI	SST	Arid1a	93760	0.00186418	0.0407275	-0.280869	15.0122	18.3345	15.4564	15.3626	17.527	19.5052	21.0018	22.2533	14.8858	16.3476	15.0565	11.5454	14.5306	13.8411
ENSMUSG00000021843	FFI	SST	Ktn1	16709	0.00237068	0.0477212	-0.281394	36.0536	37.5595	31.9825	35.1771	27.4102	43.3354	46.4518	45.2584	33.2878	35.3622	31.1253	25.0868	31.518	28.4556
ENSMUSG00000032512	FFI	SST	Wdr48	67561	0.00208987	0.0433771	-0.284507	45.6601	44.9869	48.9939	47.5191	55.1271	53.6953	63.0731	67.1669	45.0462	46.609	42.5528	32.9187	43.801	39.2906
ENSMUSG00000022710	FFI	SST	Usp7	252870	0.000331867	0.0133562	-0.290138	70.5128	76.559	66.027	66.652	65.8994	80.3042	83.8577	95.3327	65.0742	63.781	59.7332	50.8684	61.0977	58.8084
ENSMUSG00000021820	FFI	SST	Camk2g	12325	0.00159078	0.0368586	-0.290442	277.077	302.199	273.839	237.234	243.816	272.804	288.341	329.338	210.218	221.548	203.528	152.259	210.634	209.239
ENSMUSG00000001424	FFI	SST	Snd1	56463	0.00256518	0.0499051	-0.291398	58.1874	78.3504	65.7705	59.4648	59.6449	75.5961	86.7924	84.3736	53.7602	67.61	53.0704	44.3176	54.4786	57.2666
ENSMUSG00000025764	FFI	SST	Jade1	269424	0.0017169	0.0385754	-0.29626	38.1782	39.5835	42.4349	40.2016	45.2366	45.3034	45.2359	55.9543	36.8658	32.4983	35.2111	25.5312	34.5013	31.5131
ENSMUSG00000078591	FFI	SST	Hs3st4	628779	0.000203789	0.00978332	-0.298805	71.9795	71.6229	68.4899	63.9256	65.3942	83.1352	83.6945	92.3258	59.505	60.6246	57.1035	56.0655	66.9845	56.5624
ENSMUSG00000073530	FFI	SST	Pappa2	23850	0.00228764	0.0464701	-0.300633	0.576488	0.850049	0.925308	0.589229	4.87981	0.547474	0.776147	3.55463	0.797921	0.441565	0.425062	0.346412	0.362911	0.478042
ENSMUSG00000033565	FFI	SST	Rbfox2	93686	0.000352934	0.0139347	-0.30244	62.6424	66.9397	67.5905	67.8383	57.7986	82.3206	87.3347	94.438	61.4692	59.5584	63.2137	51.3352	58.1289	66.1785
ENSMUSG00000020032	FFI	SST	Nuak1	77976	0.00181945	0.0404615	-0.303817	31.8781	37.5113	34.7119	32.222	28.4312	40.2823	42.2802	43.4364	27.4478	29.0579	30.3142	20.2974	29.9779	29.6107
ENSMUSG00000064105	FFI	SST	Cnnm2	94219	0.000925885	0.0262912	-0.304186	26.0669	32.4175	40.8356	30.5592	29.2509	42.1141	40.991	40.5077	26.2698	28.1485	28.987	28.659	27.6523	26.4412
ENSMUSG00000033628	FFI	SST	Pik3c3	225326	0.00165401	0.0376584	-0.305412	38.5179	42.3814	39.4767	32.6168	38.0729	50.0774	51.74	49.5273	32.6067	37.4801	34.1469	27.0058	31.4666	37.6541
ENSMUSG00000022350	FFI	SST	Washc5	223593	0.000618352	0.0198258	-0.305761	34.2747	29.9491	31.4422	32.5151	26.15	40.9549	44.0409	44.406	30.1329	30.649	32.2197	25.2622	30.2559	26.0898
ENSMUSG00000026657	FFI	SST	Frmd4a	209630	0.00197162	0.0418334	-0.306297	13.5244	12.5821	15.012	15.6264	11.7884	16.6979	18.4903	24.6701	14.1145	14.0996	13.2975	10.7036	14.1537	11.5888
ENSMUSG00000036698	FFI	SST	Ago2	239528	0.00246907	0.0491092	-0.307779	12.2601	12.6632	12.2413	13.7727	12.0564	15.3223	17.0751	21.6883	12.2085	10.9844	14.6723	9.97902	11.4447	10.2783
ENSMUSG00000058230	FFI	SST	Arhgap35	232906	0.0011347	0.0301389	-0.308125	80.8081	88.5224	92.9262	75.2234	79.0118	101.251	106.579	106.494	72.5963	76.118	68.8912	52.1224	73.0101	75.5635
ENSMUSG00000025422	FFI	SST	Agap2	216439	0.00240277	0.0481493	-0.308887	334.903	370.083	396.387	318.831	375.185	442.897	495.694	420.939	270.468	371.695	281.509	235.344	315.974	290.696
ENSMUSG00000027475	FFI	SST	Kif3b	16569	0.000809371	0.0238452	-0.309816	29.0162	30.6921	32.6838	25.0639	31.3705	34.7822	37.4368	41.1564	26.8621	27.9897	25.8373	19.3281	26.1045	25.0128
ENSMUSG00000064302	FFI	SST	Clasp1	76707	0.000370252	0.0142724	-0.309883	50.9126	57.324	46.9959	46.2969	40.2372	58.7741	61.0339	74.0307	46.938	45.7601	42.6119	35.8981	44.2504	45.4735
ENSMUSG00000033009	FFI	SST	Ogfod1	270086	0.000552506	0.0184806	-0.310046	69.6895	65.4139	60.328	66.2368	53.4039	72.8914	77.808	97.4341	61.8451	54.3601	58.7955	49.1391	57.7567	49.5974
ENSMUSG00000020680	FFI	SST	Taf15	70439	0.00181862	0.0404615	-0.311541	69.8699	65.0887	62.8994	86.7112	82.3672	76.3129	105.835	123.137	61.2274	73.6892	65.9272	62.2427	63.1084	66.9156
ENSMUSG00000041781	FFI	SST	Cpsf2	51786	0.000711537	0.0215822	-0.312071	22.6321	24.1194	21.0213	20.1731	21.5257	26.0298	31.1642	28.658	20.9038	20.57	19.5363	15.5366	19.2944	18.6658
ENSMUSG00000038970	FFI	SST	Lmtk2	231876	0.00173629	0.0389409	-0.312834	59.85	63.7497	67.6448	59.1388	74.3658	73.4281	83.7643	83.9508	49.384	62.3831	60.4172	40.2143	52.781	48.2468
ENSMUSG00000044788	FFI	SST	Fads6	328035	0.000313454	0.0127931	-0.314231	18.8395	21.966	20.9297	23.4704	17.6935	23.0779	25.924	25.559	16.8597	17.4236	18.0205	14.6037	17.9017	15.5018
ENSMUSG00000018548	FFI	SST	Trim37	68729	0.000747874	0.0224016	-0.314361	183.202	166.838	168.009	184.091	162.728	199.17	229.318	233.141	155.065	131.639	167.973	123.062	160.639	138.25
ENSMUSG00000063142	FFI	SST	Kcnma1	16531	0.00113831	0.0301426	-0.314728	35.652	34.2516	31.3711	34.2232	31.7532	33.8133	41.3772	51.4632	29.9216	27.8054	29.5834	24.3988	29.6351	23.6372
ENSMUSG00000022376	FFI	SST	Adcy8	11514	0.00105547	0.0285727	-0.315186	13.8186	15.5817	17.1765	14.361	16.6963	20.3756	21.4531	21.2749	13.1887	16.4526	15.1471	12.1712	12.5466	13.451
ENSMUSG00000029190	FFI	SST	D5Ertd579e	320661	0.000487839	0.0169109	-0.315425	56.7696	58.3745	57.0553	52.3049	53.9317	67.3316	79.1451	80.9804	55.7	52.6654	51.6217	40.14	54.8863	48.3157
ENSMUSG00000041438	FFI	SST	Utp4	21771	0.0023203	0.0469878	-0.316982	20.8709	22.1195	18.8559	20.6942	23.5803	28.3946	29.1935	35.4502	21.1621	20.6579	22.4662	15.5765	22.1711	15.8067
ENSMUSG00000025092	FFI	SST	Hspa12a	73442	0.000140525	0.00756227	-0.317097	92.1922	94.6517	79.0345	85.2098	64.2614	99.8297	113.042	116.451	81.079	72.4367	76.8616	69.0334	79.0185	66.1756
ENSMUSG00000031066	FFI	SST	Usp11	236733	0.00208613	0.0433668	-0.317283	98.5	109.186	104.935	101.968	109.054	144.239	160.319	124.813	90.8881	107.902	98.7184	75.9066	81.172	96.071
ENSMUSG00000029291	FFI	SST	Rufy3	52822	0.000355629	0.0139347	-0.317339	180.989	178.579	161.142	177.279	142.226	211.427	218.559	281.54	164.962	150.088	170.343	158.385	156.393	144.896
ENSMUSG00000020124	FFI	SST	Usp15	14479	0.00115478	0.0303578	-0.318645	42.106	40.9861	33.1519	38.5063	35.1878	40.5242	45.9028	59.8492	33.3925	30.9684	34.8871	25.1288	33.7863	31.0311
ENSMUSG00000005370	FFI	SST	Msh6	17688	0.00186004	0.0407275	-0.318937	8.03638	7.89635	8.65639	8.30822	9.74917	12.3129	13.5973	11.4548	8.76114	7.27141	9.10283	7.14327	7.58184	8.04748
ENSMUSG00000027188	FFI	SST	Pamr1	210622	0.0016173	0.0371872	-0.319084	16.0004	19.4061	19.7902	15.4796	26.6234	20.0368	20.201	22.7708	11.4376	15.4797	13.959	11.204	15.2703	13.5197
ENSMUSG00000038102	FFI	SST	Trappc11	320714	0.00150207	0.0358688	-0.319371	28.0166	25.5936	24.0951	24.5778	23.9022	32.7967	36.3198	32.2664	24.537	24.7845	21.9619	16.5276	23.1071	20.2719
ENSMUSG00000025867	FFI	SST	Cplx2	12890	0.00134212	0.0332317	-0.319737	1088.78	1102.66	1097.72	827.878	1066.22	1329.06	1382.05	1215.47	839.426	973.703	724.78	701.249	949.53	911.77
ENSMUSG00000059263	FFI	SST	Usp47	74996	0.000363894	0.0141341	-0.320767	38.1888	42.7662	35.8145	37.3306	40.2429	43.9512	51.3784	53.802	35.7886	34.9738	35.5891	26.6089	33.2526	31.849
ENSMUSG00000041298	FFI	SST	Katnal1	231912	0.000480988	0.016884	-0.321311	36.8181	37.4988	34.5813	40.9153	34.9159	43.5412	48.9886	61.2125	34.6205	32.7014	36.8964	30.1027	37.1189	30.6883
ENSMUSG00000021577	FFI	SST	Sdha	66945	0.000194127	0.00952508	-0.321783	407.327	432.318	418.036	432.928	433.383	512.103	563.016	558.014	381.582	339.33	409.622	316.242	378.555	362.326
ENSMUSG00000048078	FFI	SST	Tenm4	23966	0.000983793	0.0273536	-0.322329	19.3785	20.9668	23.086	18.4722	24.1769	25.0847	26.8569	31.5767	17.5149	21.9636	16.6585	14.2283	19.1195	18.7439
ENSMUSG00000039431	FFI	SST	Mtmr7	54384	0.000116174	0.00654203	-0.324237	60.0389	57.9015	53.7845	53.3054	57.3781	66.6197	76.5229	79.3956	53.8702	51.5728	51.8224	44.9527	50.7747	45.2037
ENSMUSG00000033278	FFI	SST	Ptprm	19274	0.00173901	0.0389409	-0.324408	24.6678	28.2832	26.1795	21.8508	25.8425	36.039	42.288	39.1436	22.0214	27.8544	27.4089	22.0615	20.445	28.6092
ENSMUSG00000038485	FFI	SST	Socs7	192157	0.000837676	0.0244097	-0.324424	29.203	32.7202	33.789	29.6028	34.1083	39.3466	44.7209	49.0406	31.7296	32.2564	30.3484	21.358	29.4706	27.6625
ENSMUSG00000022416	FFI	SST	Cacna1i	239556	0.00150083	0.0358688	-0.324692	24.074	22.2537	28.6715	22.4735	22.4026	32.102	34.8564	30.0217	16.4221	24.4048	21.2235	19.0381	21.6194	21.0918
ENSMUSG00000049717	FFI	SST	Lig4	319583	0.00254506	0.0498772	-0.326133	4.52491	4.64815	3.25292	4.75495	2.12351	4.94518	6.13257	7.80698	3.85406	3.90409	4.5449	3.3359	3.98344	3.30519
ENSMUSG00000031012	FFI	SST	Cask	12361	0.00182356	0.0404615	-0.326243	24.7933	27.3998	23.6239	25.4085	26.2012	29.9516	29.4121	45.2342	22.8568	25.9278	23.5025	17.4353	21.0674	19.5035
ENSMUSG00000020658	FFI	SST	Efr3b	668212	0.000200725	0.00967105	-0.326549	75.4684	89.2144	85.7004	75.8863	86.8621	95.3471	97.7474	97.2282	68.9775	66.9581	63.6546	51.9694	69.4144	66.1997
ENSMUSG00000025968	FFI	SST	Ndufs1	227197	0.00010326	0.00596584	-0.326701	182.093	176.802	167.667	163.476	184.832	213.928	219.947	246.141	163.882	156.823	150.778	132.076	169.466	137.429
ENSMUSG00000063550	FFI	SST	Nup98	269966	0.00120384	0.0310762	-0.326895	8.42044	7.95397	6.69452	7.34717	8.62741	10.6785	11.1069	11.7603	8.5842	7.95714	6.87394	6.14504	7.44306	5.91948
ENSMUSG00000021983	FFI	SST	Atp8a2	50769	0.00131959	0.0328567	-0.326953	20.2334	22.6774	20.152	18.0948	16.1952	28.2086	28.7165	22.5684	16.4858	18.3966	16.9962	17.0725	15.0204	17.7484
ENSMUSG00000050812	FFI	SST	Ecpas	230249	0.00242975	0.0485441	-0.32706	33.0324	26.5324	28.2515	33.4356	34.0239	33.5616	39.4605	60.8397	29.6728	27.2472	32.4639	23.1743	24.405	25.0979
ENSMUSG00000030515	FFI	SST	Tarsl2	272396	0.00118619	0.0307994	-0.327094	25.6949	27.8807	23.5698	26.5195	31.4255	27.6523	35.4063	40.1741	22.2252	20.0744	25.7293	18.4307	23.6269	21.0638
ENSMUSG00000004500	FFI	SST	Zfp324	243834	0.00228033	0.0464448	-0.327216	3.82408	5.5781	4.50449	4.03431	5.28041	6.65624	5.71983	6.79491	4.51943	3.80821	3.86381	2.985	4.1381	4.36327
ENSMUSG00000036641	FFI	SST	Ccdc148	227933	0.00249719	0.0494473	-0.327578	11.6478	11.885	12.5	13.5659	12.5055	13.207	20.0398	19.2747	12.658	9.89784	11.3347	7.81173	10.8733	11.2727
ENSMUSG00000027086	FFI	SST	Fastkd1	320720	0.00104414	0.0284876	-0.327739	12.4382	12.6025	11.7311	10.3993	9.92202	13.9804	16.2675	20.3402	11.2913	11.2943	10.8018	10.5883	11.0484	9.33955
ENSMUSG00000037605	FFI	SST	Adgrl3	319387	0.00204917	0.0427938	-0.328598	32.4156	35.5658	29.3526	33.7002	32.134	43.109	41.4558	53.3006	28.2817	23.5868	28.7887	24.0321	27.6441	37.5308
ENSMUSG00000055013	FFI	SST	Agap1	347722	0.000633595	0.0200854	-0.330176	44.5369	49.3625	52.176	43.8178	45.5679	58.8938	64.9746	57.634	44.1882	40.7241	38.0891	30.2782	42.2462	40.6628
ENSMUSG00000035954	FFI	SST	Dock4	238130	0.00229253	0.0464986	-0.331467	17.783	10.9827	10.6378	16.4579	14.3319	16.2518	20.3696	27.0593	14.6903	11.6462	14.9527	10.8148	14.5503	9.9697
ENSMUSG00000020176	FFI	SST	Grb10	14783	0.00232721	0.0469878	-0.331966	26.0339	26.1205	21.7052	30.4685	22.4896	28.4415	32.7743	47.5485	26.2705	17.5222	25.1508	19.5462	22.8847	18.8083
ENSMUSG00000051527	FFI	SST	Usp29	57775	0.000706071	0.0214652	-0.332303	19.8206	22.3132	16.9643	20.0066	19.4605	22.9697	25.604	31.5153	18.2186	16.2363	18.367	16.6835	14.3941	18.3999
ENSMUSG00000032194	FFI	SST	Kank2	235041	0.00177954	0.0397154	-0.333117	5.12486	5.32764	7.98978	6.76588	4.85973	6.88335	9.67903	8.08989	5.48745	5.23155	4.29858	4.34	5.85486	5.15462
ENSMUSG00000066438	FFI	SST	Plekhd1	217682	0.00185965	0.0407275	-0.333629	7.82665	9.41679	10.5841	8.19321	5.61207	10.4464	8.23907	10.9508	6.29002	5.79051	5.5812	4.93882	6.96492	6.82095
ENSMUSG00000024897	FFI	SST	Apba1	319924	0.000101358	0.00588138	-0.334055	84.2683	98.6841	96.1435	94.4014	81.1634	99.5853	112.455	107.316	75.3924	71.9242	71.7264	58.3846	72.6191	74.333
ENSMUSG00000022263	FFI	SST	Trio	223435	0.00238717	0.0479806	-0.334058	56.948	62.8322	72.6094	59.5564	116.024	93.2796	97.1485	122.763	60.5547	87.3741	61.9925	41.5044	59.7381	62.6404
ENSMUSG00000027787	FFI	SST	Nmd3	97112	0.000414675	0.0153729	-0.33429	32.895	28.0109	25.0146	32.3687	49.2248	41.9846	43.3445	49.582	26.2379	29.1868	30.068	28.1497	33.4049	27.7211
ENSMUSG00000050944	FFI	SST	Efcab5	319634	0.00107775	0.0289993	-0.334809	1.58766	1.24474	1.467	2.67158	3.00563	1.4529	2.92503	10.6075	1.58553	1.74692	1.33717	0.699459	1.61055	0.714438
ENSMUSG00000032786	FFI	SST	Alas1	11655	0.00197053	0.0418334	-0.334906	74.2052	87.6789	78.716	68.4456	62.7264	98.5943	89.276	116.294	57.7078	81.3084	61.514	42.8954	62.0004	64.3323
ENSMUSG00000040724	FFI	SST	Kcna2	16490	9.10055e-05	0.00546899	-0.335947	69.4678	74.8562	73.5094	60.3408	65.7121	85.4745	80.6147	99.7786	62.5403	57.0524	55.578	50.8338	64.3134	61.4442
ENSMUSG00000024078	FFI	SST	Ttc27	74196	0.00198648	0.0419992	-0.336053	18.4509	21.9393	22.3268	17.3279	24.4045	29.0289	24.0066	28.043	15.7015	18.4333	16.8427	11.1342	19.1947	17.2592
ENSMUSG00000040387	FFI	SST	Klhl32	212390	0.001175	0.0307481	-0.336204	7.44037	6.87217	7.77121	6.80888	10.2977	11.487	9.8224	10.1064	6.11292	7.42146	6.99372	5.9093	5.8827	7.19579
ENSMUSG00000045348	FFI	SST	Nyap1	243300	0.000700168	0.0214559	-0.336229	87.8111	96.0171	102.777	89.2231	67.2607	122.82	138.396	120.59	78.3038	98.4951	73.769	71.5538	77.998	88.9207
ENSMUSG00000021271	FFI	SST	Zfp839	72805	0.000410765	0.015313	-0.336253	8.51537	10.3979	11.4224	9.05689	11.2564	11.1488	10.8009	13.1095	7.30885	8.31959	7.57027	6.97935	7.97376	7.14566
ENSMUSG00000023805	FFI	SST	Synj2	20975	0.000561123	0.0186691	-0.336677	36.2103	39.6017	37.6175	29.6428	31.6203	48.9498	49.6054	44.391	31.3359	32.6125	32.7423	23.8805	32.4569	31.6196
ENSMUSG00000005958	FFI	SST	Ephb3	13845	0.00220304	0.0450947	-0.337207	13.822	18.8962	17.4497	13.7175	24.1931	20.3403	19.7962	28.8987	13.4525	18.3955	11.8828	10.3332	13.1402	14.505
ENSMUSG00000022973	FFI	SST	Synj1	104015	0.00211276	0.0437474	-0.337342	601.635	423.113	395.11	482.216	482.54	530.321	811.796	674.9	469.658	447.093	465.049	320.655	419.556	292.552
ENSMUSG00000001229	FFI	SST	Dpp9	224897	0.00118343	0.0307994	-0.33787	38.0464	42.4166	46.3006	34.0103	39.2847	60.6407	57.2104	48.6856	31.6625	39.6794	34.806	28.7912	34.6515	39.5457
ENSMUSG00000031976	FFI	SST	Urb2	382038	0.0021155	0.0437474	-0.338678	3.88786	5.05402	5.10447	5.0504	5.28713	5.89668	7.25558	6.76424	4.06114	4.52049	4.35381	2.5366	4.20577	4.05819
ENSMUSG00000020181	FFI	SST	Nav3	260315	0.00241394	0.0483004	-0.339277	12.4792	10.9794	9.54205	11.3788	9.85525	10.2464	14.4822	21.2455	10.0191	9.7227	9.3357	6.69915	9.75915	7.32209
ENSMUSG00000040797	FFI	SST	Iqsec3	243621	0.00088794	0.0254848	-0.339737	64.7802	77.9998	67.9303	55.7437	74.3615	88.7571	90.4732	84.3018	55.6645	71.6835	55.0962	43.7377	55.7126	51.2206
ENSMUSG00000035919	FFI	SST	Bbs9	319845	0.00144407	0.0349774	-0.340252	17.4517	20.8572	21.8487	17.9443	21.8324	23.4222	25.2536	34.1991	17.9691	19.5347	15.8956	12.2309	17.144	18.0839
ENSMUSG00000042606	FFI	SST	Hirip3	233876	0.00151482	0.0359729	-0.340492	52.1247	48.0001	44.687	56.57	44.9009	75.1805	87.7554	65.3589	47.7201	54.92	40.8222	48.5657	40.8599	46.6614
ENSMUSG00000009731	FFI	SST	Kcnd1	16506	0.000610299	0.0196266	-0.340667	5.90136	8.15295	7.14425	5.80315	10.0863	9.85031	8.4677	9.68518	5.79713	6.27935	5.40067	5.5161	6.76539	5.93521
ENSMUSG00000053141	FFI	SST	Ptprt	19281	0.00158896	0.0368586	-0.340829	35.6055	32.2186	27.9212	31.2043	25.8806	39.056	52.5157	53.758	32.5764	30.3823	35.8669	26.6703	29.603	20.6248
ENSMUSG00000032216	FFI	SST	Nedd4	17999	0.00134553	0.0332544	-0.340862	174.648	156.53	162.686	162.87	171.094	209.319	259.706	347.424	185.492	171.511	186.516	127.832	185.817	138.21
ENSMUSG00000040383	FFI	SST	Aqr	11834	0.000690854	0.0213322	-0.341314	12.2712	14.1958	13.5818	11.2125	16.6595	18.4554	17.0767	18.9762	11.4597	14.0557	11.2362	9.0167	12.1345	11.2434
ENSMUSG00000034342	FFI	SST	Cbl	12402	0.00122435	0.031303	-0.341343	8.0811	7.55837	7.838	7.37805	6.23327	9.9423	8.95808	15.3886	7.67485	6.44313	7.01938	6.84879	7.37832	6.46916
ENSMUSG00000040389	FFI	SST	Wdr47	99512	0.000913822	0.026004	-0.341499	80.1677	71.5622	64.428	70.8986	61.4902	73.0654	89.9928	120.061	63.8068	58.317	64.5538	47.0121	64.8264	52.9072
ENSMUSG00000029501	FFI	SST	Ankle2	71782	0.0010524	0.0285727	-0.34213	17.8538	17.3834	15.2398	19.2851	15.403	23.6151	24.6417	28.615	15.5041	16.2763	17.4709	18.4301	14.361	12.8831
ENSMUSG00000038299	FFI	SST	Wdr36	225348	0.00042093	0.0155186	-0.342823	18.0149	18.3894	18.5128	17.0905	13.8588	24.8664	24.0043	27.8505	15.9759	17.6479	18.8788	13.2049	17.0565	15.4386
ENSMUSG00000020593	FFI	SST	Lpin1	14245	0.000182749	0.00913473	-0.343231	13.4307	15.6095	13.3884	12.73	8.5779	18.413	17.9908	18.8488	14.0403	11.5471	11.8791	11.0611	12.099	11.3387
ENSMUSG00000061175	FFI	SST	Fnip2	329679	0.000742022	0.0223041	-0.343805	5.30027	4.45743	4.7753	5.18364	3.88678	6.31656	5.76353	7.74174	4.08281	4.6791	4.25439	3.33369	4.18039	4.29373
ENSMUSG00000030145	FFI	SST	Zfp248	72720	0.00253758	0.0498038	-0.344996	8.54197	7.14894	7.22129	7.17262	7.07385	8.53298	9.73497	18.5966	7.72908	5.58643	7.25506	5.87568	6.83905	6.59458
ENSMUSG00000034656	FFI	SST	Cacna1a	12286	0.000849152	0.0246365	-0.345014	86.0245	80.6315	93.3569	68.3013	83.744	99.6679	126.68	127.169	70.4431	97.0933	65.4636	65.6097	74.89	65.7058
ENSMUSG00000019726	FFI	SST	Lyst	17101	0.00188819	0.0409752	-0.345181	7.08238	11.6582	6.33048	5.90899	8.06921	8.05095	9.05736	13.607	6.5076	7.47121	5.60737	4.1581	6.63273	5.38231
ENSMUSG00000031227	FFI	SST	Magee1	107528	0.000547983	0.0183753	-0.345697	130.399	130.787	113.546	140.05	114.507	155.475	195.234	165.55	110.094	103.692	132.641	104.412	100.773	100.834
ENSMUSG00000031853	FFI	SST	Map3k21	234878	0.00251382	0.0496294	-0.345725	1.69564	1.69258	2.01093	1.23019	1.02172	1.80315	1.97202	2.89008	1.3502	1.44098	1.12483	0.913699	1.1568	1.24675
ENSMUSG00000021185	FFI	SST	Dglucy	217830	0.00121898	0.0312596	-0.345789	7.60339	7.18067	8.58405	6.90784	9.87191	8.42033	10.3179	11.9436	6.28814	5.40689	5.58633	6.47439	6.76191	6.53025
ENSMUSG00000043987	FFI	SST	Cep164	214552	0.00194163	0.0414608	-0.346165	4.47515	5.25336	4.09616	5.79042	9.58453	4.09057	6.55538	17.7109	3.73372	5.26289	3.95875	1.85998	3.38221	3.70247
ENSMUSG00000074283	FFI	SST	Zfp109	56869	0.00196014	0.0417777	-0.346802	1.25223	1.21533	1.26891	1.79352	3.94471	2.01519	1.87128	2.89589	0.610567	0.793523	1.31976	0.773434	0.794377	1.1777
ENSMUSG00000054611	FFI	SST	Kdm2a	225876	0.00153748	0.0361891	-0.346822	22.9143	28.9139	23.0481	20.319	28.6672	29.6655	31.6628	31.421	20.7226	22.9711	18.2457	11.501	18.3741	19.2934
ENSMUSG00000025272	FFI	SST	Tro	56191	0.00160471	0.0369888	-0.347402	38.5077	44.1345	37.5612	35.0419	57.7602	60.0203	63.7178	46.4408	31.3413	44.3784	33.3342	28.0805	29.3858	36.8112
ENSMUSG00000037990	FFI	SST	Sh3rf3	237353	0.000337512	0.0134863	-0.347734	8.9328	9.20794	10.6019	8.53031	8.23713	12.2732	15.1306	15.5987	8.62743	9.90999	9.39742	7.5607	10.3915	8.8235
ENSMUSG00000032338	FFI	SST	Hcn4	330953	0.000507436	0.0174094	-0.34793	6.27577	7.96985	7.5308	6.90206	6.71903	8.59061	9.30989	10.7013	5.89367	6.45794	6.40285	5.69298	5.01688	6.43901
ENSMUSG00000037369	FFI	SST	Kdm6a	22289	0.00251328	0.0496294	-0.348587	5.99459	3.42299	5.1027	8.96414	6.47919	6.96843	8.75484	19.7246	5.66815	4.72945	7.33929	4.80921	6.6247	5.02868
ENSMUSG00000029765	FFI	SST	Plxna4	243743	0.000237041	0.0108124	-0.3489	17.9158	18.9027	17.3853	14.194	14.5777	20.1963	20.9913	27.4724	14.9848	16.3221	13.0333	12.4518	15.209	15.6363
ENSMUSG00000025607	FFI	SST	Copg2	54160	0.00057213	0.0188534	-0.34918	56.2804	50.9261	47.9912	50.4857	53.4255	59.9138	57.5933	87.1055	45.7367	38.0515	47.0018	37.7994	46.096	39.7369
ENSMUSG00000030092	FFI	SST	Cntn6	53870	0.00162961	0.0373049	-0.349327	9.79581	10.7557	9.58831	9.52031	9.47066	12.1744	13.1119	20.4988	8.97471	9.46985	10.2507	8.57061	9.13639	6.73584
ENSMUSG00000039096	FFI	SST	Rsad1	237926	0.00119921	0.0310168	-0.349435	8.01453	8.8369	7.05902	8.34492	11.0284	9.43422	9.20964	12.8709	6.85872	6.11301	5.987	4.85754	6.51021	7.51016
ENSMUSG00000054889	FFI	SST	Dsp	109620	0.00243773	0.0486308	-0.350158	1.66756	1.5272	1.74766	1.18387	2.14776	2.26378	2.88352	2.11851	1.57165	1.55682	1.10124	0.740771	1.48959	1.07309
ENSMUSG00000001985	FFI	SST	Grik3	14807	0.00193567	0.0413998	-0.35039	32.7734	35.2048	37.416	38.3508	32.2074	50.2075	78.9346	54.2147	29.4144	43.3795	45.1734	28.6815	30.1634	32.3193
ENSMUSG00000034310	FFI	SST	Tmem132d	243274	0.000225301	0.0104968	-0.350462	16.5963	18.2302	15.2862	13.3926	10.451	17.6639	19.4366	21.7825	11.4814	13.2346	12.2768	10.5574	13.3886	14.2584
ENSMUSG00000023032	FFI	SST	Slc4a8	59033	0.000831084	0.0243238	-0.351301	16.7285	21.7185	18.1877	19.2423	18.3328	23.4601	23.4231	36.3476	18.2899	16.8983	16.1748	18.8827	15.9157	14.802
ENSMUSG00000066640	FFI	SST	Fbxl18	231863	0.000391215	0.0148751	-0.351512	10.7967	12.5369	12.711	12.0764	13.7174	15.179	16.1206	15.021	10.8795	10.623	9.84634	7.3861	10.4957	9.4987
ENSMUSG00000020580	FFI	SST	Rock2	19878	0.00150345	0.0358688	-0.351909	640.888	493.07	490.141	629.468	513.066	441.665	610.708	826.809	394.35	376.147	466.644	301.639	349.513	291.262
ENSMUSG00000020721	FFI	SST	Helz	78455	0.000877552	0.0252955	-0.352568	6.45277	6.73332	5.5386	6.67165	7.90895	7.31642	8.13523	11.6069	6.25347	5.80619	5.71103	4.23236	5.96107	4.81779
ENSMUSG00000047888	FFI	SST	Tnrc6b	213988	0.00120703	0.0310984	-0.35323	6.92918	6.79315	5.73817	7.18713	5.35483	6.933	7.54854	12.1112	5.91433	4.79108	6.10383	4.37193	5.5101	4.65814
ENSMUSG00000047013	FFI	SST	Fbxo41	330369	0.000651005	0.0204913	-0.353241	46.3556	48.6342	50.3449	38.3722	44.5933	58.7522	59.4683	58.1897	35.9394	44.5456	35.3712	26.0748	37.9741	39.1191
ENSMUSG00000033102	FFI	SST	Cdc14b	218294	0.00224545	0.0458924	-0.35338	5.11822	3.82189	3.26396	4.31497	3.12928	4.31861	6.74503	11.9783	4.13229	4.03318	4.06442	3.80121	3.93513	3.53823
ENSMUSG00000056755	FFI	SST	Grm7	108073	0.00212949	0.0437906	-0.353428	29.4984	25.9418	28.1458	27.9553	21.4555	32.1974	39.5468	71.6388	26.9232	21.7791	33.0367	24.6146	27.0987	18.6019
ENSMUSG00000039318	FFI	SST	Rab3gap2	98732	0.00066436	0.0208625	-0.353755	33.6812	38.5038	35.4386	26.6423	34.5113	47.4238	47.0224	42.1098	28.1416	35.9192	28.3414	22.1839	26.9943	27.9124
ENSMUSG00000027881	FFI	SST	Prpf38b	66921	0.0011016	0.0294629	-0.353958	24.4776	23.2377	24.0991	32.2264	35.5067	39.8942	46.897	36.0332	24.5674	26.7804	28.3033	18.1635	22.8474	27.3587
ENSMUSG00000064043	FFI	SST	Trerf1	224829	0.00132537	0.0329393	-0.354506	8.61635	8.25675	8.95753	8.67959	11.583	10.5657	13.7457	14.7946	8.2604	9.42313	8.14757	5.38527	8.55051	6.1514
ENSMUSG00000050211	FFI	SST	Pla2g4e	329502	0.00101134	0.0278871	-0.354652	26.0289	31.4611	31.0317	25.1157	25.2952	33.2676	34.898	41.1913	23.167	28.4135	20.7631	14.8722	22.745	21.568
ENSMUSG00000052727	FFI	SST	Map1b	17755	0.00029521	0.0125583	-0.354937	88.5948	82.3745	60.2218	89.2485	59.7917	89.3769	106.97	124.692	78.7006	66.5436	75.1046	59.7591	66.8801	56.7822
ENSMUSG00000005533	FFI	SST	Igf1r	16001	0.000378464	0.0144727	-0.355688	9.69252	9.12845	8.17832	9.84463	8.37959	10.8536	12.7442	15.5545	8.66211	8.37053	9.08328	6.29629	8.82936	7.60724
ENSMUSG00000040033	FFI	SST	Stat2	20847	0.000672199	0.0210591	-0.356247	12.1444	15.4474	13.5009	11.7854	16.5824	18.6655	19.8711	21.0437	12.4489	14.4108	10.7539	8.91351	13.5133	13.069
ENSMUSG00000047036	FFI	SST	Zfp445	235682	0.00186944	0.0407275	-0.35681	41.5591	32.2033	30.8081	40.1352	50.1562	41.1943	58.9122	73.5341	36.7776	43.4553	31.259	20.6888	33.4612	23.7272
ENSMUSG00000046691	FFI	SST	Chtf8	214987	0.00200894	0.0421561	-0.357119	15.3831	13.7762	14.4417	11.5904	11.9908	21.9526	27.2172	29.9491	11.7947	18.4771	18.9034	10.871	14.9634	8.70437
ENSMUSG00000034525	FFI	SST	Ice1	218333	0.0018467	0.0407275	-0.357173	42.4638	36.3133	37.9842	41.7115	62.9641	41.9342	53.4653	83.0164	36.7495	37.4626	34.6576	21.5818	39.0734	24.3581
ENSMUSG00000031543	FFI	SST	Ank1	11733	0.00196273	0.0417777	-0.357552	56.2222	79.4208	76.1714	69.2689	47.707	95.3682	96.7069	60.4285	37.1085	61.4014	54.4031	32.6003	37.9397	49.7792
ENSMUSG00000029576	FFI	SST	Radil	231858	0.0020329	0.0425919	-0.357637	6.52043	8.95902	8.37896	5.97125	5.84301	9.2947	7.45131	15.1661	4.88136	7.91999	4.44053	4.59266	5.49861	5.50088
ENSMUSG00000046962	FFI	SST	Zbtb21	114565	0.00128288	0.0322436	-0.357736	7.98935	9.23726	11.2435	9.55376	14.2579	12.0573	12.369	19.2206	7.96655	10.4174	7.40973	7.32436	9.36444	7.8783
ENSMUSG00000039501	FFI	SST	Znfx1	98999	0.00101507	0.0279321	-0.35789	27.1166	31.9925	32.0167	21.5445	31.1461	40.2677	38.2861	36.6546	23.6373	28.982	21.8868	15.3815	24.1092	24.1308
ENSMUSG00000109372	FFI	SST	Gm19410	100502846	0.000576188	0.0188939	-0.35816	6.87085	7.62439	6.08121	6.051	4.97686	7.72757	8.38127	10.2239	4.98388	6.0541	4.63533	4.53322	5.98268	6.00042
ENSMUSG00000028753	FFI	SST	Vwa5b1	75718	0.00205215	0.0427938	-0.358232	2.79962	5.65545	3.38352	4.36322	3.40259	5.49013	4.007	3.83089	2.37769	1.46759	2.12308	2.15039	2.05769	3.29927
ENSMUSG00000053580	FFI	SST	Tanc2	77097	0.000329547	0.0133277	-0.35824	25.1551	25.1628	22.0206	20.4689	33.369	27.3849	29.3307	32.6392	21.6734	19.8162	18.7968	13.8869	21.0093	16.8077
ENSMUSG00000041773	FFI	SST	Enc1	13803	0.000115879	0.00654203	-0.358834	316.958	305.363	298.208	281.983	301.18	349.205	380.862	411.137	248.16	247.97	272.901	191.96	273.684	225.62
ENSMUSG00000020396	FFI	SST	Nefh	380684	0.00104592	0.0284876	-0.359272	134.347	180.324	142.413	130.828	106.159	204.414	172.933	176.371	115.537	100.27	98.7409	88.7328	104.601	149.923
ENSMUSG00000024501	FFI	SST	Dpysl3	22240	0.000193586	0.00952508	-0.359481	35.4955	39.2783	35.9167	35.9113	29.34	43.8351	48.9197	53.9406	36.7461	31.5576	32.9416	24.8634	31.8851	27.5688
ENSMUSG00000103793	FFI	SST	Pcdhga6	93714	0.001604	0.0369888	-0.359506	4.09501	7.62333	6.16545	5.20782	1.49316	6.1288	7.57853	9.71918	3.67056	4.72931	4.23914	3.10852	4.51549	5.70001
ENSMUSG00000038354	FFI	SST	Ankrd35	213121	0.000884207	0.0254324	-0.359718	17.4618	23.4428	21.843	18.2188	16.7518	28.0724	28.8806	24.5663	16.9156	18.9707	14.4037	13.4439	14.5785	19.6969
ENSMUSG00000015599	FFI	SST	Ttbk1	106763	0.00162168	0.0371872	-0.359928	32.5356	40.3441	40.8559	37.6166	38.0462	51.2435	67.0123	40.0001	25.5099	37.1806	32.1172	20.5593	29.1607	33.3113
ENSMUSG00000026553	FFI	SST	Copa	12847	5.12796e-05	0.00374596	-0.359973	101.731	98.312	92.3098	91.2637	96.6442	128.328	134.122	138.038	86.7554	86.5088	95.8644	71.6372	95.7331	81.6467
ENSMUSG00000027254	FFI	SST	Map1a	17754	0.00165634	0.0376584	-0.360289	121.491	141.272	120.399	106.545	124.565	178.535	202.781	120.316	90.0171	129.293	89.8573	67.2807	86.5924	98.1305
ENSMUSG00000028246	FFI	SST	Faxc	76132	0.000949409	0.0266754	-0.360509	9.41696	11.2701	8.00043	8.73145	10.9035	11.6811	12.042	13.9172	8.83728	9.0798	7.96255	6.2904	6.60439	5.88029
ENSMUSG00000024271	FFI	SST	Elp2	58523	0.000193728	0.00952508	-0.360996	68.5536	74.8211	74.2305	67.138	78.8361	103.056	94.0095	99.4924	61.6418	74.3977	66.0581	50.8345	62.0017	60.9954
ENSMUSG00000034684	FFI	SST	Sema3f	20350	0.00164027	0.0374205	-0.361257	8.95858	9.97401	12.142	8.85566	21.5864	13.9544	13.0934	19.1647	6.13195	11.5922	9.42329	6.79007	7.71664	8.70214
ENSMUSG00000042272	FFI	SST	Sestd1	228071	5.9696e-05	0.00408565	-0.363204	15.8836	14.0395	13.0637	14.1185	16.4604	16.4765	19.3608	19.5883	12.2895	11.6715	13.047	10.399	12.8704	10.7831
ENSMUSG00000048814	FFI	SST	Lonrf2	381338	0.000289985	0.0124843	-0.363715	57.1293	59.9017	50.0645	64.4996	61.8603	65.771	84.0684	88.4313	52.7954	44.8133	59.2106	46.545	49.5675	42.1702
ENSMUSG00000001911	FFI	SST	Nfix	18032	0.000437763	0.0159036	-0.364848	49.5269	56.2025	55.1073	69.542	40.0673	54.4673	88.5019	78.6801	42.1829	49.6581	47.4043	38.9729	45.5163	46.4689
ENSMUSG00000024190	FFI	SST	Dusp1	19252	0.000439716	0.0159036	-0.365059	22.0891	25.0657	27.6194	28.3271	30.4122	46.0379	47.2902	59.2338	31.1956	37.3355	28.3092	23.9422	35.1465	30.2827
ENSMUSG00000017774	FFI	SST	Myo1c	17913	0.000305145	0.0127265	-0.365222	6.77927	8.47285	6.93295	5.59999	12.3232	7.95873	8.16754	9.12159	5.13429	5.79227	4.76351	4.3478	5.83817	5.35866
ENSMUSG00000025427	FFI	SST	Rnf165	225743	0.000464177	0.0164758	-0.365395	11.3507	12.4227	13.2487	11.3247	12.7341	15.428	17.8975	21.3444	10.9903	12.3152	12.5033	7.92974	11.9907	10.7364
ENSMUSG00000021339	FFI	SST	Mrs2	380836	0.000249431	0.0111335	-0.365677	24.3671	25.1485	23.512	22.4501	20.9977	35.5353	34.7926	36.4459	25.7399	24.5155	22.5157	17.4777	24.2069	18.9528
ENSMUSG00000103749	FFI	SST	Pcdhgb5	93702	0.00168913	0.0382087	-0.366511	1.9168	2.32252	2.20941	2.52975	1.81263	4.00883	4.44005	4.81741	2.39143	2.81427	2.47492	2.10672	2.51636	1.20795
ENSMUSG00000020456	FFI	SST	Ogdh	18293	0.000448535	0.016163	-0.366713	178.564	220.432	226.857	176.116	212.626	285.849	280.197	220.187	150.81	164.177	163.795	134.374	165.824	186.295
ENSMUSG00000003119	FFI	SST	Cdk12	69131	0.000649654	0.0204913	-0.366946	7.10014	8.39068	6.36922	6.35736	7.77527	7.36612	10.3642	12.034	6.26103	6.01869	5.8502	4.83228	6.30612	5.96269
ENSMUSG00000021275	FFI	SST	Tecpr2	104859	0.000723002	0.0218802	-0.367128	22.5506	25.971	24.0453	18.2536	21.7537	28.37	30.2866	30.3089	18.748	22.839	15.0445	12.2982	18.6407	18.3644
ENSMUSG00000034007	FFI	SST	Scaper	244891	0.000414096	0.0153729	-0.367345	11.9516	13.7031	11.5792	11.4172	8.20036	13.4532	17.1174	18.2834	11.8636	9.10995	10.2319	7.77181	9.95077	10.4815
ENSMUSG00000042426	FFI	SST	Dhx29	218629	0.0003975	0.0150284	-0.367403	10.6095	11.5413	12.0697	10.056	11.594	15.9462	15.3732	16.8339	10.2022	9.87489	10.519	7.28086	9.58997	11.4708
ENSMUSG00000031644	FFI	SST	Nek1	18004	0.00156264	0.0365042	-0.367895	13.771	6.34757	7.30719	13.1979	9.66569	11.6662	18.4129	26.5661	12.2147	9.03701	11.428	8.51143	10.8145	6.66448
ENSMUSG00000071369	FFI	SST	Map3k5	26408	0.000336998	0.0134863	-0.368297	14.7656	16.0738	16.1239	16.1244	11.6025	19.1848	24.2864	22.5237	13.7007	14.4599	14.6982	9.85601	15.0128	13.3388
ENSMUSG00000033943	FFI	SST	Mga	29808	0.00131806	0.0328567	-0.368661	7.23154	7.05956	6.22401	6.96316	9.78324	9.37741	8.60578	12.9773	6.52466	7.09766	6.64603	4.49598	5.51107	3.67451
ENSMUSG00000020340	FFI	SST	Cyfip2	76884	5.48024e-05	0.00389039	-0.369434	364.557	386.202	379.649	342.244	329.651	397.627	409.263	469.81	281.962	284.397	287.474	206.56	290.326	275.577
ENSMUSG00000037275	FFI	SST	Gemin5	216766	0.000938032	0.0264672	-0.370005	6.24194	7.41208	7.67082	5.73078	6.88763	11.1055	10.424	8.1945	5.75495	6.98937	5.41016	4.33145	5.7095	6.3445
ENSMUSG00000035051	FFI	SST	Dhx57	106794	0.000539563	0.0182304	-0.370699	16.9447	17.885	15.7404	13.5306	14.2523	21.1477	24.3436	25.0156	15.2298	18.0057	12.586	10.2179	14.0029	14.3458
ENSMUSG00000038453	FFI	SST	Srcin1	56013	0.000756128	0.0225239	-0.37079	90.9877	88.4819	99.9641	89.2677	101.465	131.268	174.746	121.741	78.1345	107.446	85.8138	63.1238	84.5328	84.5489
ENSMUSG00000028664	FFI	SST	Ephb2	13844	0.000198518	0.00966944	-0.370828	10.5461	12.6953	12.2201	11.5718	8.11792	14.3509	17.2377	18.6902	9.22386	11.9575	9.52398	10.1179	10.1101	11.1054
ENSMUSG00000056856	FFI	SST	Jakmip3	74004	0.0010658	0.0287937	-0.370952	20.3776	22.6154	23.0288	18.3447	30.5247	25.167	27.2939	44.236	20.8909	20.134	15.1023	12.7675	20.2938	18.8477
ENSMUSG00000033981	FFI	SST	Gria2	14800	0.000493488	0.0170624	-0.371228	80.4134	61.7784	54.5651	77.4675	73.9049	84.0288	111.544	140.922	69.7082	72.7799	75.8791	63.8309	65.94	51.8175
ENSMUSG00000020513	FFI	SST	Tubd1	56427	0.00149246	0.035838	-0.371289	7.02512	4.19809	6.8465	5.79092	5.00517	7.65669	7.65699	10.516	5.7619	3.37396	3.91088	3.98915	3.87697	5.52482
ENSMUSG00000079614	FFI	SST	Seh1l	72124	0.000174206	0.00887388	-0.371864	26.2285	30.1887	27.0492	28.7816	28.7363	34.5174	37.3172	44.2328	25.9639	24.5914	27.5634	21.4806	24.5401	19.6214
ENSMUSG00000029250	FFI	SST	Polr2b	231329	0.000700663	0.0214559	-0.37204	34.6258	52.7744	46.1761	31.4442	48.2282	58.0617	49.0189	56.5523	34.9038	41.3291	31.4159	23.3643	27.1112	34.4349
ENSMUSG00000013033	FFI	SST	Adgrl1	330814	9.43071e-05	0.00559388	-0.372178	126.078	143.784	149.731	115.651	116.607	174.204	182.332	186.993	99.1212	134.901	111.5	101.194	113.009	124.25
ENSMUSG00000029253	FFI	SST	Cenpc1	12617	0.0012605	0.0318299	-0.372291	8.01095	7.75582	5.33293	7.69085	8.53242	8.08274	10.8525	17.7714	7.1472	7.27139	6.61566	6.20513	6.72436	5.22267
ENSMUSG00000020495	FFI	SST	Smg8	74133	0.000452803	0.0162014	-0.3725	10.6119	10.6216	9.83075	9.01716	8.38744	14.6537	13.2156	19.2823	8.40717	9.83479	9.76671	8.0037	9.49117	10.7803
ENSMUSG00000034799	FFI	SST	Unc13a	382018	0.00129505	0.0324622	-0.372953	48.917	51.0924	60.4319	40.0698	132.321	81.2372	92.2128	65.9745	40.3742	64.0929	40.2628	26.3744	45.239	43.4221
ENSMUSG00000037325	FFI	SST	Bbs7	71492	0.00117829	0.030774	-0.373225	14.8624	15.8835	14.4094	16.0343	24.695	19.2206	22.8147	33.6726	14.8489	16.8089	15.1947	10.0452	15.4237	9.93874
ENSMUSG00000031161	FFI	SST	Hdac6	15185	0.000999404	0.0276723	-0.373296	27.1616	32.5867	32.329	26.3454	33.0853	46.2969	41.9501	33.8535	24.9129	29.9042	21.2899	16.2551	21.0356	25.6283
ENSMUSG00000024240	FFI	SST	Epc1	13831	0.00103984	0.028438	-0.373305	38.8407	36.6388	40.8417	37.7977	51.5194	47.6364	69.0146	80.7973	38.0092	49.0896	41.8126	30.255	33.5031	26.7723
ENSMUSG00000031959	FFI	SST	Wdr59	319481	0.000394769	0.0149676	-0.374228	15.2575	16.6957	15.0135	14.6952	12.2119	20.2931	22.3301	22.6798	14.2489	14.7406	14.3935	8.90811	13.8014	12.7233
ENSMUSG00000022016	FFI	SST	Akap11	219181	0.00075103	0.0224234	-0.374383	47.5687	59.2786	55.3239	49.2054	59.2661	52.341	66.6987	71.4758	42.1564	40.7878	43.6008	29.0439	39.1934	25.1466
ENSMUSG00000024617	FFI	SST	Camk2a	12322	0.000484456	0.016884	-0.374928	879.455	970.214	1027.36	768.121	972.143	1075.85	1095.07	1076.9	594.646	746.383	658.87	432.846	772.911	679.183
ENSMUSG00000024901	FFI	SST	Peli3	240518	0.000115634	0.00654203	-0.375286	34.128	42.7458	42.4744	34.8542	24.0694	49.9877	51.6707	49.9105	30.5515	35.7587	30.1932	27.7169	28.9949	36.1149
ENSMUSG00000021557	FFI	SST	Agtpbp1	67269	0.000293546	0.0125566	-0.376083	207.094	303.893	217.99	164.973	354.734	290.98	254.182	272.189	202.235	176.885	147.999	141.382	144.707	182.319
ENSMUSG00000045333	FFI	SST	Zfp423	94187	0.000181265	0.00909462	-0.377585	12.3499	13.8659	14.8275	14.4291	9.04889	17.924	15.2802	17.905	11.2663	10.6041	11.6611	8.32974	11.1754	9.94743
ENSMUSG00000090112	FFI	SST	Shprh	268281	0.000586462	0.0190901	-0.377638	6.26127	5.24575	5.68288	6.97007	6.16973	7.50346	8.90667	12.4965	6.57352	5.22822	6.40388	4.52535	5.90876	4.81509
ENSMUSG00000000804	FFI	SST	Usp32	237898	0.000100465	0.00586652	-0.377802	48.4465	62.0581	58.9863	45.7834	52.3557	66.8729	64.9673	70.0077	44.2103	41.6778	45.1586	32.3143	40.9411	47.5484
ENSMUSG00000027652	FFI	SST	Ralgapb	228850	2.36731e-05	0.00206497	-0.378776	41.0488	46.7998	43.2056	44.3222	39.9169	49.7138	58.0229	61.7631	37.9937	37.6425	39.4872	29.2664	36.0546	34.6581
ENSMUSG00000040359	FFI	SST	Ufl1	67490	0.0003572	0.0139392	-0.378777	15.6718	18.4143	16.0972	16.1361	16.9299	19.5026	22.7569	26.8503	13.5102	16.9299	15.3114	10.6162	13.1005	12.9275
ENSMUSG00000067028	FFI	SST	Cntnap5b	241175	0.00100809	0.0278551	-0.378858	0.935765	1.06746	0.769404	1.32065	0.585552	1.25785	1.91073	3.37784	0.55189	1.03193	1.00774	0.869943	0.791578	0.450814
ENSMUSG00000026024	FFI	SST	Als2	74018	0.000250752	0.0111491	-0.379824	15.4719	19.1858	20.3223	17.2599	16.3374	24.2529	27.4829	21.9361	15.1437	17.3889	14.8909	12.336	13.7352	16.1825
ENSMUSG00000038664	FFI	SST	Herc1	235439	0.000833882	0.0243523	-0.380026	28.213	26.3967	25.2601	24.4414	38.0226	31.6132	41.0266	42.5775	21.6643	29.6787	21.3778	13.0436	22.3707	20.8939
ENSMUSG00000026618	FFI	SST	Iars2	381314	0.000317082	0.0129017	-0.382213	20.9874	26.5306	23.8086	19.702	31.8056	30.521	29.6909	36.8844	19.7658	21.5236	18.1158	13.6243	19.783	22.9661
ENSMUSG00000038807	FFI	SST	Rap1gap2	380711	7.96202e-05	0.00496547	-0.382745	86.3105	104.423	110.395	85.8419	86.2126	122.614	110.423	124.636	78.8697	81.7319	73.1148	56.0736	81.8028	73.9046
ENSMUSG00000025757	FFI	SST	Hspa4l	18415	0.000451404	0.0161947	-0.382825	46.5059	40.4977	33.6253	44.0395	37.7742	58.7797	65.6558	70.5528	42.3207	34.7856	48.3303	36.2608	38.9081	27.0833
ENSMUSG00000033209	FFI	SST	Ttc28	209683	0.00122031	0.0312596	-0.383148	2.73189	3.11888	3.08016	2.65826	3.51728	3.8524	5.16315	9.46787	3.46134	3.52947	2.6957	1.37778	3.16011	2.6264
ENSMUSG00000022629	FFI	SST	Kif21a	16564	7.1264e-05	0.00459338	-0.383442	99.3686	123.28	92.6803	89.1316	101	125.103	141.369	125.5	83.2134	91.4787	86.8902	68.3003	73.1757	85.3016
ENSMUSG00000054667	FFI	SST	Irs4	16370	0.000932362	0.0263629	-0.383537	1.99282	3.09338	1.52419	3.91423	0.865639	2.59741	3.52145	7.77482	3.26219	1.24142	1.63688	1.5562	1.05763	1.17569
ENSMUSG00000055817	FFI	SST	Mta3	116871	0.000704865	0.0214652	-0.3837	46.4924	62.0725	54.6701	43.5874	46.2682	70.5324	77.9169	65.9347	41.1392	51.0255	41.1144	26.0097	36.2	47.2951
ENSMUSG00000032458	FFI	SST	Copb2	50797	2.65727e-05	0.00223044	-0.383787	72.7013	74.4956	73.9022	65.6813	72.1489	100.635	102.831	105.143	66.5736	69.1918	71.0693	55.6301	58.6969	68.3469
ENSMUSG00000037270	FFI	SST	4932438A13Rik	229227	0.000404591	0.0151676	-0.384078	35.5893	33.5869	32.7456	30.7634	39.694	37.5196	51.0329	52.4474	29.575	32.1767	29.9867	18.852	29.7953	24.8841
ENSMUSG00000019790	FFI	SST	Stxbp5	78808	0.000292981	0.0125566	-0.384358	29.4063	36.1097	29.5426	25.3362	53.6434	37.794	38.0236	43.1519	27.1747	28.815	22.5161	16.5774	22.7087	24.2717
ENSMUSG00000020776	FFI	SST	Fbf1	217335	0.000827306	0.0242664	-0.384608	34.385	32.9321	31.7116	29.6556	40.7916	47.4836	60.1683	42.2951	26.751	39.4863	23.4993	20.1759	26.8477	29.0511
ENSMUSG00000026764	FFI	SST	Kif5c	16574	0.000630375	0.0200309	-0.384707	423.459	295.998	306.856	377.013	304.514	473.406	672.435	535.924	357.536	293.825	374.696	258.819	395.471	232.23
ENSMUSG00000047787	FFI	SST	Flrt1	396184	0.00069095	0.0213322	-0.386508	5.78718	8.58208	8.86423	8.24532	6.00075	9.29415	13.8943	13.6876	5.74685	8.26544	8.75358	6.11647	5.96244	6.03284
ENSMUSG00000048118	FFI	SST	Arid4a	238247	0.000212973	0.0100667	-0.386859	9.16959	9.43832	8.50563	9.93888	10.3657	12.5026	15.6767	17.3446	9.69405	10.0141	9.78399	7.17147	8.08455	9.65659
ENSMUSG00000020380	FFI	SST	Rad50	19360	0.00108058	0.0290168	-0.387025	6.15558	6.57628	5.76219	5.36668	5.63833	7.25976	10.8296	10.1919	6.15491	6.25638	4.77476	3.34364	4.81597	2.83848
ENSMUSG00000032232	FFI	SST	Cgnl1	68178	0.000543834	0.0183017	-0.387226	8.98596	11.3066	10.3463	9.95241	7.35502	13.4357	13.3574	12.6087	8.35902	8.15545	6.3274	5.2205	7.70832	9.36573
ENSMUSG00000043531	FFI	SST	Sorcs1	58178	0.000171927	0.00879135	-0.388114	9.37675	10.8492	9.42399	9.70347	6.67434	10.9963	11.6403	15.9127	8.32108	7.52501	8.12328	7.4334	8.44585	6.32182
ENSMUSG00000021700	FFI	SST	Rab3c	67295	7.23914e-05	0.00460046	-0.389243	165.625	150.152	146.045	175.382	141.632	189.509	244.033	252.815	150.176	125.341	162.785	127.292	150.282	125.655
ENSMUSG00000037818	FFI	SST	Abhd18	269423	0.00084358	0.0245281	-0.390994	5.37228	5.18667	3.41482	8.43636	11.3706	11.1305	10.2729	12.6036	5.67685	6.13551	7.89166	4.52641	7.52849	4.16769
ENSMUSG00000053644	FFI	SST	Aldh7a1	110695	0.000426745	0.0156674	-0.391262	42.1903	59.0641	59.6367	59.0008	51.3797	100.414	94.5539	87.4729	40.0816	63.1071	59.5902	50.7967	48.724	62.6802
ENSMUSG00000026867	FFI	SST	Gapvd1	66691	0.000205109	0.00981142	-0.39129	37.3861	34.1408	33.4691	34.517	39.0942	48.1357	55.6637	60.6557	36.6191	37.3495	37.4039	25.3967	32.7602	26.2109
ENSMUSG00000031376	FFI	SST	Atp2b3	320707	0.000364315	0.0141341	-0.391494	21.3329	21.9684	19.2667	21.8404	14.197	27.257	36.7073	30.4534	16.8788	20.994	20.1998	18.3525	13.8913	18.8493
ENSMUSG00000038630	FFI	SST	Zkscan16	100041581	0.00103123	0.0283185	-0.391526	4.95317	5.64328	3.47126	4.83666	10.9557	6.37839	6.93213	6.82031	3.83509	4.63129	3.31257	1.87008	2.21888	3.04599
ENSMUSG00000056602	FFI	SST	Fry	320365	0.000269309	0.0117843	-0.392069	79.4909	79.0714	76.4272	80.4926	78.2302	78.6065	99.7594	128.649	66.2658	60.8557	66.004	45.3185	67.9766	52.0277
ENSMUSG00000049739	FFI	SST	Zfp646	233905	0.000246611	0.0110445	-0.39208	6.90803	7.91751	7.89863	6.05513	8.2762	8.46113	10.2777	11.929	6.14325	7.49286	5.34816	4.95571	6.57696	5.51014
ENSMUSG00000039976	FFI	SST	Tbc1d16	207592	0.000252325	0.0111507	-0.393636	16.8063	20.2753	21.0087	18.574	20.5902	26.5045	31.8035	28.4972	15.6618	20.5638	17.2371	12.0338	18.6539	18.1443
ENSMUSG00000035078	FFI	SST	Mtmr9	210376	9.25186e-05	0.00551229	-0.393699	60.931	57.7322	50.7493	58.691	47.8167	63.6484	77.4258	95.8496	48.9324	44.0717	53.4167	42.9649	53.0961	43.2543
ENSMUSG00000038759	FFI	SST	Nup205	70699	0.000476295	0.0167721	-0.396468	6.79249	7.68793	6.56649	6.98447	8.76064	9.26656	9.64091	11.3044	6.81895	6.89283	5.4048	4.04411	6.19642	4.42822
ENSMUSG00000036667	FFI	SST	Tcaf1	77574	2.41348e-06	0.000402629	-0.396938	138.434	131.397	119.315	126.98	122.301	168.638	178.651	201.045	123.905	126.331	121.838	97.7839	114.12	110.665
ENSMUSG00000034453	FFI	SST	Polr3b	70428	3.22777e-05	0.00262669	-0.398056	9.56862	10.4403	9.82359	8.77456	6.31369	12.6051	12.5962	13.4652	8.83518	8.33796	8.03308	6.46198	7.86895	8.1654
ENSMUSG00000031709	FFI	SST	Tbc1d9	71310	5.13645e-05	0.00374596	-0.398975	68.41	70.6159	75.6363	59.8866	66.3572	84.3539	97.4169	90.9638	57.9376	62.404	60.8584	42.0343	54.8694	55.4512
ENSMUSG00000032777	FFI	SST	Gtf3c1	233863	0.000574288	0.0188779	-0.399126	35.3264	39.5377	41.0673	30.9236	39.262	55.8331	60.4807	44.0623	27.2444	40.4006	27.825	19.5132	28.269	32.1194
ENSMUSG00000061536	FFI	SST	Sec22c	215474	7.85845e-06	0.000944854	-0.399519	17.1315	19.5575	18.2005	17.7257	15.7879	22.4041	22.9823	24.9985	16.4744	15.5643	13.7917	13.1464	15.6829	13.4688
ENSMUSG00000025047	FFI	SST	Pdcd11	18572	0.000487411	0.0169109	-0.402666	6.31898	6.69787	7.22633	6.92723	6.71586	10.6485	10.6695	7.45128	5.31899	6.58067	5.21474	3.85142	5.09575	5.65109
ENSMUSG00000055319	FFI	SST	Sec23ip	207352	5.5896e-05	0.00392625	-0.403024	18.4891	20.5943	19.7427	18.7028	21.8258	25.2738	26.8456	33.0489	19.6197	18.1746	18.2673	13.1671	16.8816	16.6399
ENSMUSG00000051344	FFI	SST	Plekhm3	241075	0.0003107	0.0127931	-0.403106	12.7226	12.2191	13.1586	11.3846	8.99112	16.1796	14.954	27.1113	12.6219	10.3815	10.7882	8.80459	12.0945	10.6095
ENSMUSG00000037112	FFI	SST	Sik2	235344	0.000558988	0.0186506	-0.403629	5.97045	6.34933	5.66179	4.4764	5.05282	7.56489	8.0434	10.1805	4.71487	5.62043	5.91062	3.06826	4.1661	3.8855
ENSMUSG00000061603	FFI	SST	Akap6	238161	0.000510491	0.0174693	-0.403652	23.2204	18.882	16.4945	21.5364	20.8396	19.9918	26.8193	39.3153	19.5926	15.543	17.594	11.2639	15.8137	12.099
ENSMUSG00000040675	FFI	SST	Mthfd1l	270685	5.52092e-05	0.00389853	-0.403764	9.01312	11.6651	10.1068	9.1085	6.63216	13.2946	12.7526	13.8432	8.22432	9.40851	7.42779	7.22255	7.68487	8.2911
ENSMUSG00000032515	FFI	SST	Csrnp1	215418	0.000769472	0.0228208	-0.406155	6.17556	5.1614	7.26966	5.50294	7.37738	7.82908	8.35539	18.77	5.00309	5.87397	3.74642	4.85212	6.63897	5.44017
ENSMUSG00000026135	FFI	SST	Zfp142	77264	0.000104698	0.00602281	-0.406374	8.54268	9.22276	10.0095	8.23683	7.86595	12.2994	11.8726	12.5924	7.46454	8.33758	6.92443	5.33878	7.59314	7.96234
ENSMUSG00000023009	FFI	SST	Nckap5l	380969	0.000738122	0.022237	-0.40716	6.4658	8.60665	10.9477	9.89447	8.99256	8.69364	9.07799	28.5373	6.60132	6.51859	4.26124	8.0696	5.81248	4.97666
ENSMUSG00000037426	FFI	SST	Depdc5	277854	0.00019629	0.00959594	-0.407825	29.0516	38.922	38.6235	28.6916	37.3906	48.4303	55.4679	44.9168	28.5421	34.4265	27.8996	20.1792	29.4899	31.6636
ENSMUSG00000072294	FFI	SST	Klf12	16597	0.000681728	0.0212235	-0.408641	3.19762	2.55757	1.97934	3.08819	1.62457	2.49643	3.84529	11.0293	2.36955	2.07177	2.77953	1.77466	1.96039	1.81414
ENSMUSG00000066643	FFI	SST	Wdr35	74682	5.88007e-05	0.00404513	-0.40875	17.6557	20.0467	17.8028	16.5783	32.9955	24.9229	27.4426	25.6927	15.8659	17.6878	15.9602	12.6721	13.976	17.4421
ENSMUSG00000020361	FFI	SST	Hspa4	15525	1.15655e-05	0.00122503	-0.409514	121.609	106.423	98.7199	110.731	101.058	148.119	177.286	197.87	109.255	110.424	122.649	90.8864	111.372	96.7966
ENSMUSG00000038112	FFI	SST	AW551984	244810	0.000356043	0.0139347	-0.409788	9.62195	10.5349	8.42903	13.5179	15.1062	16.9124	18.8172	18.8568	12.0009	9.19536	11.9097	11.0301	7.56631	8.04476
ENSMUSG00000070565	FFI	SST	Rasal2	226525	7.27332e-05	0.00460046	-0.410993	10.6868	9.82478	10.4304	11.5767	9.89978	11.848	14.4449	20.0988	9.51757	9.11998	9.56074	8.42597	9.59237	8.20146
ENSMUSG00000018076	FFI	SST	Med13l	76199	0.000213463	0.0100667	-0.411304	14.7356	14.0844	12.2248	13.8789	12.2474	15.6083	20.5552	24.5811	12.7027	12.5896	12.5605	7.81215	12.6273	10.3136
ENSMUSG00000025571	FFI	SST	Tnrc6c	217351	0.000186553	0.00929007	-0.411613	11.9158	13.2072	10.5108	12.3569	11.2671	13.7545	18.1638	19.7288	10.7533	11.4077	8.93755	6.81187	11.2727	9.66421
ENSMUSG00000024974	FFI	SST	Smc3	13006	0.000246058	0.0110445	-0.412	21.7562	18.8712	18.9658	20.8113	29.4308	27.62	35.7781	36.4639	21.4928	20.5673	21.9943	14.9951	19.7193	13.19
ENSMUSG00000004099	FFI	SST	Dnmt1	13433	0.000233405	0.0107415	-0.412374	18.5953	19.5735	19.1606	17.8678	24.1765	27.0169	32.9761	24.6392	16.5009	20.1543	16.6433	11.8145	14.3835	16.3618
ENSMUSG00000034390	FFI	SST	Cmip	74440	0.000251453	0.0111491	-0.413089	65.8038	86.3246	69.8521	69.0855	62.8872	98.0236	125.337	89.5939	51.7844	73.9418	62.6198	49.9468	49.5409	63.4893
ENSMUSG00000061911	FFI	SST	Myt1l	17933	1.28395e-05	0.00129815	-0.413377	65.2074	64.9718	56.7638	57.9867	56.7241	75.805	93.8918	85.4302	57.5426	51.2882	58.0832	43.7859	52.1837	49.0605
ENSMUSG00000038417	FFI	SST	Fig4	103199	2.61233e-05	0.00220659	-0.415502	20.5909	26.1727	24.9722	20.23	21.085	29.0888	30.8797	35.8818	20.5424	21.0617	20.3582	14.6131	19.0121	19.6484
ENSMUSG00000022054	FFI	SST	Nefm	18040	0.000181182	0.00909462	-0.415892	362.245	450.352	370.606	361.027	246.342	559.468	515.782	531.715	313.485	268.192	282.47	254.605	282.359	421.698
ENSMUSG00000029163	FFI	SST	Emilin1	100952	0.00059402	0.0192422	-0.418213	2.50007	1.20899	1.40488	1.95733	4.11438	4.20787	2.81614	7.89237	2.10603	2.28946	1.49364	1.72313	1.67818	1.86467
ENSMUSG00000038437	FFI	SST	Mllt6	246198	0.00010802	0.00618728	-0.418804	32.0607	40.7145	43.3276	37.6166	37.79	55.1237	62.8665	55.9515	32.3899	42.3388	32.5738	24.0583	33.8411	36.0606
ENSMUSG00000062908	FFI	SST	Acadm	11364	9.10278e-05	0.00546899	-0.419209	37.8235	44.0849	50.9321	49.5549	58.9255	74.628	62.8167	85.4673	42.9858	41.1269	45.4032	31.936	47.3671	49.3092
ENSMUSG00000040785	FFI	SST	Ttc3	22129	2.72879e-06	0.000438776	-0.419894	540.965	576.357	514.663	466.193	485.291	680.565	712.619	696.414	457.311	500.023	423.415	370.361	421.773	409.142
ENSMUSG00000026812	FFI	SST	Tsc1	64930	0.000167944	0.00868755	-0.420174	22.6334	24.6423	23.6403	22.5951	23.8933	29.7682	38.5941	39.6002	20.388	26.7946	18.9091	14.2882	19.2392	21.6347
ENSMUSG00000043535	FFI	SST	Setx	269254	0.000271731	0.0118381	-0.424597	15.8312	12.5779	11.7883	14.8394	14.6381	17.05	26.1106	23.6212	14.7167	14.2118	12.6509	8.45209	12.5829	8.8639
ENSMUSG00000025969	FFI	SST	Nrp2	18187	1.92111e-05	0.00180557	-0.424626	14.6563	16.473	15.9634	16.6676	15.1386	19.4184	21.2862	25.4618	14.3275	13.2837	13.3189	12.7032	10.8984	14.0245
ENSMUSG00000038916	FFI	SST	Soga3	67412	0.000100662	0.00586652	-0.424709	17.2814	19.1181	14.425	15.0268	22.0733	19.8921	23.0506	31.3194	14.3399	13.2077	14.4969	16.0551	12.6274	12.888
ENSMUSG00000018401	FFI	SST	Mtmr4	170749	2.95064e-05	0.0024612	-0.425595	37.6443	37.7137	32.9886	37.4706	40.8822	43.7052	48.7151	54.6391	32.1187	29.3793	34.5008	22.9924	29.5065	25.0983
ENSMUSG00000032393	FFI	SST	Dpp8	74388	3.76863e-06	0.000576672	-0.426386	52.1696	59.7924	60.2677	52.39	55.7367	70.5628	73.1129	83.2577	50.6357	47.6784	48.0125	36.5756	50.3662	43.2301
ENSMUSG00000068115	FFI	SST	Ninl	78177	0.000524817	0.0179136	-0.426473	6.36822	3.77444	4.09424	4.35707	3.78654	6.54072	5.4408	7.92327	2.95191	4.31452	2.28581	1.4964	3.56816	3.22452
ENSMUSG00000032356	FFI	SST	Rasgrf1	19417	2.33844e-05	0.00205321	-0.426641	228.198	270.32	235.914	198.906	237.181	312.466	326.186	292.168	186.504	215.809	187.497	146.915	172.78	199.573
ENSMUSG00000022602	FFI	SST	Arc	11838	0.000461504	0.0164246	-0.427942	23.7251	25.1833	35.1413	19.4714	39.7909	84.3685	77.1017	68.7704	31.0036	54.9384	29.3025	20.4113	39.497	46.2328
ENSMUSG00000035247	FFI	SST	Hectd1	207304	9.1382e-05	0.00546899	-0.429574	26.7866	24.1309	23.871	23.0925	33.8833	33.1916	37.1693	41.5282	24.5622	23.2073	24.2929	14.8229	22.5938	17.3963
ENSMUSG00000034413	FFI	SST	Neurl1b	240055	0.000176178	0.00894017	-0.429751	11.6877	13.461	16.62	12.0533	21.2576	17.7972	20.5475	21.7874	10.5797	13.5132	10.8707	6.84328	13.1233	10.8761
ENSMUSG00000032590	FFI	SST	Apeh	235606	0.000146337	0.00781204	-0.430426	46.9595	32.6498	47.2785	32.3821	68.0005	49.8773	40.3776	69.4373	24.9936	34.1132	26.3759	29.3325	27.9639	31.5601
ENSMUSG00000002799	FFI	SST	Jag2	16450	0.00031202	0.0127931	-0.43165	12.3338	17.2726	14.4872	14.6158	16.3468	22.509	23.279	28.5994	12.5357	19.2547	12.4416	10.0408	13.2033	8.52843
ENSMUSG00000024042	FFI	SST	Sik1	17691	0.000200508	0.00967105	-0.431943	4.82862	6.84919	5.98707	5.52609	7.4213	10.4647	10.9468	10.5556	6.17904	6.75192	6.9315	3.6702	5.66131	5.34026
ENSMUSG00000026491	FFI	SST	Ahctf1	226747	0.000158479	0.00825505	-0.433113	23.4413	23.3132	21.8222	22.0623	35.6285	34.0927	33.6492	40.8402	23.16	24.0159	20.284	13.0958	22.0941	15.9801
ENSMUSG00000048232	FFI	SST	Fbxo10	269529	4.06487e-06	0.00059438	-0.433269	23.3073	28.9227	28.6016	22.5973	30.062	32.947	33.1922	36.461	20.0754	22.5134	20.9334	18.4891	18.6315	23.0235
ENSMUSG00000024127	FFI	SST	Prepl	213760	8.61098e-07	0.000190469	-0.433665	191.413	204.358	166.125	179.567	154.518	238.1	254.735	285.62	163.116	159.796	176.543	151.06	141.396	157.935
ENSMUSG00000039512	FFI	SST	Uhrf1bp1	224648	0.000121193	0.00673936	-0.435412	5.70592	7.89754	7.40921	6.23015	7.84452	8.39148	9.90948	9.86857	5.35168	6.8565	5.05558	3.73756	5.70183	4.41177
ENSMUSG00000041444	FFI	SST	Arhgap32	330914	4.3596e-06	0.000612455	-0.442155	44.0637	44.8361	41.5808	40.4899	44.0263	48.4008	53.6958	66.1056	34.5239	36.3367	35.8084	26.0031	33.8801	33.0959
ENSMUSG00000052105	FFI	SST	Mtcl1	68617	7.71709e-05	0.00483532	-0.444787	22.5521	21.9208	26.0589	24.0975	20.4275	28.8793	39.2778	49.0679	21.8652	26.3283	21.3394	15.5395	22.003	21.4247
ENSMUSG00000037572	FFI	SST	Wdhd1	218973	0.000368979	0.0142724	-0.445437	2.19857	1.1319	2.00168	2.01178	3.04447	4.79518	1.81823	5.35495	1.09312	1.8982	1.24037	1.70492	1.4523	0.996507
ENSMUSG00000028358	FFI	SST	Zfp618	72701	9.06775e-05	0.00546899	-0.447805	1.82286	1.95244	1.73927	1.79867	2.30554	2.17659	2.89314	3.00746	1.44034	1.61343	1.53728	1.19424	1.31514	1.62877
ENSMUSG00000037709	FFI	SST	Fam13a	58909	0.000208782	0.00995146	-0.449367	7.20955	6.19968	4.80136	7.47212	4.48373	7.23772	9.73631	14.4476	6.52296	4.39685	5.79272	5.27067	5.25842	3.90418
ENSMUSG00000036913	FFI	SST	Trim67	330863	0.000232309	0.0107415	-0.451189	1.67233	1.74702	2.85493	2.32008	1.54646	2.38924	2.70768	3.35678	1.66243	1.23875	1.66693	0.842173	1.26659	1.57948
ENSMUSG00000033526	FFI	SST	Ppip5k1	327655	5.17721e-05	0.00375516	-0.452361	58.2909	63.1815	66.6183	52.259	65.66	81.9554	91.8434	78.5018	49.611	58.3961	48.9917	31.9453	47.598	44.35
ENSMUSG00000035726	FFI	SST	Supt16	114741	8.48813e-07	0.000190469	-0.452486	32.5486	40.6268	34.2534	34.1779	35.4855	46.5928	50.2924	51.598	31.2309	31.2071	31.9214	23.4708	30.4258	29.6722
ENSMUSG00000037487	FFI	SST	Ubr5	70790	6.22388e-05	0.00419515	-0.452844	88.2002	76.215	69.3828	76.6534	85.0337	92.9693	122.221	128.679	72.8161	73.7043	65.4027	43.836	69.2519	51.4809
ENSMUSG00000021313	FFI	SST	Ryr2	20191	0.000238187	0.0108124	-0.454247	19.3805	18.2048	14.0577	15.9018	22.3374	23.2538	32.7334	26.1521	13.565	17.6742	13.2634	6.60346	16.2521	12.1089
ENSMUSG00000035392	FFI	SST	Dennd1a	227801	3.97841e-05	0.00312329	-0.454397	34.9488	38.8497	38.6321	26.547	35.4943	47.1499	48.3649	55.2623	29.129	34.1725	24.2074	19.8823	32.6311	27.9714
ENSMUSG00000052557	FFI	SST	Gan	209239	8.89972e-06	0.00102393	-0.456993	3.94558	4.42232	3.77051	4.27911	4.8964	5.07169	6.38269	6.92316	3.89197	3.83431	3.58572	2.73366	3.62244	3.44915
ENSMUSG00000029804	FFI	SST	Herc3	73998	1.99056e-05	0.00185776	-0.45785	54.6933	50.1134	45.9913	56.0442	41.9146	61.4128	73.799	93.2987	44.2995	42.8994	52.2493	37.9072	43.9123	35.219
ENSMUSG00000060371	FFI	SST	Caln1	140904	6.19995e-05	0.00419515	-0.458133	65.9638	70.4924	67.7755	69.1571	39.3008	68.7411	84.0786	113.061	57.2744	35.3281	46.3153	41.9985	54.0092	50.4296
ENSMUSG00000001507	FFI	SST	Itga3	16400	1.39489e-06	0.000262171	-0.458492	15.5033	21.3451	19.6291	17.0832	20.9802	24.5584	27.9276	27.6103	14.5859	17.5219	15.1876	14.7088	15.2416	17.3031
ENSMUSG00000031139	FFI	SST	Mcf2	109904	0.00024291	0.0109894	-0.459289	6.15667	4.91924	3.0235	5.47305	5.74273	5.65243	7.64707	12.866	4.55386	3.58786	4.64621	3.65014	4.65113	2.80809
ENSMUSG00000026494	FFI	SST	Kif26b	269152	6.71888e-05	0.0043956	-0.460632	3.1601	3.57121	3.49939	3.41317	3.23608	4.29847	5.70364	4.86187	3.37637	2.82184	3.02222	2.10609	2.43702	2.20888
ENSMUSG00000103088	FFI	SST	Pcdhgb6	93703	0.000200456	0.00967105	-0.463045	2.31761	3.59917	2.931	3.34821	1.67076	4.18785	6.52475	3.97169	2.36911	2.53877	2.62019	2.19607	1.71616	2.59434
ENSMUSG00000020135	FFI	SST	Apc2	23805	0.000154877	0.00810586	-0.469234	28.6176	33.5891	36.8913	27.5256	41.255	56.189	63.8849	43.3833	23.9439	36.986	24.5148	16.0285	26.9883	31.6562
ENSMUSG00000102222	FFI	SST	Pcdhga10	93722	6.57709e-05	0.00434544	-0.472625	1.81936	1.90128	2.7943	1.51212	1.59575	3.12734	3.40025	3.64428	1.56698	1.68109	2.04913	1.54649	1.7355	2.00415
ENSMUSG00000070814	FFI	SST	Zswim9	321008	6.39493e-05	0.00426734	-0.475099	22.8363	32.4005	36.6139	26.543	34.3271	53.1545	51.7162	44.5743	23.9827	30.5444	22.9364	19.2355	24.8321	34.6623
ENSMUSG00000038587	FFI	SST	Akap12	83397	1.67655e-05	0.00159823	-0.47619	13.4841	16.5994	11.7592	14.4376	12	19.662	20.5613	18.664	13.4273	8.94543	10.2415	9.3819	11.057	11.968
ENSMUSG00000049106	FFI	SST	Dcaf5	320808	8.56015e-07	0.000190469	-0.4781	42.7666	45.3262	43.0271	39.4231	41.0403	50.1184	66.3303	66.8997	37.4416	37.9338	36.0377	28.4427	37.0886	35.08
ENSMUSG00000026163	FFI	SST	Sphkap	77629	3.11752e-05	0.00255254	-0.478195	44.1042	34.0224	33.2296	39.9754	41.007	48.139	56.7194	72.3363	36.402	33.7802	38.164	24.1556	32.0739	24.3242
ENSMUSG00000037692	FFI	SST	Ahdc1	230793	0.000153145	0.00804676	-0.478449	431.879	387.784	416.308	400.03	557.658	617.34	891.153	563.437	298.93	465.708	393.418	274.834	201.631	305.87
ENSMUSG00000078880	FFI	SST	Gm14308	100043381	0.000180074	0.00909462	-0.480537	6.86441	7.11831	11.6041	12.8527	14.7462	6.8396	11.7303	20.7444	3.4672	2.78521	2.10874	2.4585	4.21958	0.283262
ENSMUSG00000026495	FFI	SST	Efcab2	68226	1.23065e-05	0.0012732	-0.480571	20.399	21.3058	18.7401	19.7781	13.2538	31.4157	35.6225	29.1685	20.8507	20.1477	18.4398	14.5395	17.3223	15.3204
ENSMUSG00000020716	FFI	SST	Nf1	18015	2.29124e-05	0.00203859	-0.481589	21.3049	21.3462	19.16	23.7594	19.6994	22.5934	29.557	37.9922	17.9373	16.0561	19.3012	12.3144	16.7739	14.0126
ENSMUSG00000044308	FFI	SST	Ubr3	68795	4.88835e-06	0.00064594	-0.481975	65.8252	66.6894	54.7208	65.1579	90.6183	75.6385	69.7796	103.344	48.635	48.4334	51.785	37.1555	43.0045	48.9351
ENSMUSG00000042744	FFI	SST	Hectd4	269700	4.68352e-05	0.00355149	-0.483901	30.8979	36.4695	34.1486	28.2423	37.7483	43.0692	48.6149	44.6111	24.2799	30.0607	23.7381	13.9998	24.2371	25.7073
ENSMUSG00000043460	FFI	SST	Elfn2	207393	3.36706e-06	0.000534962	-0.48544	31.3434	36.9874	39.8266	34.233	32.4782	51.8219	63.7584	58.3384	29.4373	40.7254	32.1648	27.0975	34.2473	32.303
ENSMUSG00000028530	FFI	SST	Jak1	16451	1.95062e-07	5.53892e-05	-0.491275	62.8898	58.0308	55.7741	54.1294	53.7433	78.1909	91.0876	86.2221	54.554	48.9479	55.0619	43.1856	50.1993	44.1769
ENSMUSG00000049336	FFI	SST	Tenm2	23964	5.89514e-06	0.00076385	-0.492318	15.2367	15.4282	15.3079	15.1534	14.2223	19.3192	22.8082	22.165	12.4398	13.883	11.663	8.69366	13.7623	10.5264
ENSMUSG00000014498	FFI	SST	Ankrd52	237615	7.19328e-05	0.00459338	-0.492561	8.60864	11.0619	11.0029	13.4565	10.3712	16.2724	20.8771	14.2399	7.75614	8.93997	12.0778	7.68843	6.70309	7.45293
ENSMUSG00000066687	FFI	SST	Zbtb16	235320	7.16308e-05	0.00459338	-0.497246	8.09709	8.52239	7.98213	8.87135	7.08531	10.075	14.6873	14.4755	6.91984	7.8562	8.13731	4.36381	5.76377	4.82332
ENSMUSG00000039262	FFI	SST	Prrc2b	227723	9.57883e-08	3.27792e-05	-0.497295	85.8192	100.179	92.269	80.9898	84.2844	122.525	126.364	143.101	80.5789	85.2146	75.6223	59.2571	78.5621	74.2775
ENSMUSG00000034848	FFI	SST	Ttc21b	73668	4.89853e-05	0.00363199	-0.503623	5.64387	5.72886	5.35598	5.78852	6.98032	7.2032	9.43286	12.5134	5.99167	5.2818	4.82129	3.80202	5.02349	3.51418
ENSMUSG00000052837	FFI	SST	Junb	16477	2.9957e-05	0.00248327	-0.504472	15.305	18.1923	23.2239	18.2011	19.1202	45.5229	47.7698	39.1151	20.5284	31.6011	21.4581	18.3354	20.1135	23.2242
ENSMUSG00000042507	FFI	SST	Mideas	238317	8.5158e-05	0.00528613	-0.508099	4.32561	4.7208	4.18149	5.57121	4.57137	5.76281	7.03066	14.1156	4.47531	4.47725	4.37353	2.91145	4.23239	3.57116
ENSMUSG00000028053	FFI	SST	Ash1l	192195	3.93363e-06	0.000583314	-0.509382	20.314	18.4132	16.5334	17.63	16.0823	23.1331	28.8082	32.8517	16.629	18.0579	16.4232	11.4024	15.8458	13.1813
ENSMUSG00000020788	FFI	SST	Atp2a3	53313	0.000130714	0.00720872	-0.509804	1.89802	2.89804	8.66999	7.25621	3.86744	3.58057	5.03258	2.23094	1.82727	1.60068	1.29781	1.59503	1.39768	1.21262
ENSMUSG00000022829	FFI	SST	Stxbp5l	207227	0.000119972	0.00669936	-0.510028	2.97902	2.63585	2.52013	3.13745	5.15649	5.77827	6.03002	6.34981	3.31198	2.9659	3.32846	1.9796	2.35984	1.34384
ENSMUSG00000020431	FFI	SST	Adcy1	432530	4.09733e-06	0.00059438	-0.511626	113.931	88.6685	103.258	83.6631	81.32	125.131	149.887	161.965	83.8697	90.6998	80.5061	58.0236	93.2771	64.6308
ENSMUSG00000031026	FFI	SST	Trim66	330627	1.17873e-06	0.000234797	-0.512188	9.80195	10.9428	10.7778	8.9959	9.0055	12.4493	12.9388	14.303	7.71726	8.04183	7.85032	5.24595	7.55052	7.44333
ENSMUSG00000063077	FFI	SST	Kif1b	16561	1.80179e-07	5.22755e-05	-0.513469	138.764	144.641	130.279	131.49	112.718	174.635	204.256	204.626	128.452	112.701	110.692	86.741	118.832	101.861
ENSMUSG00000057133	FFI	SST	Chd6	71389	9.86056e-06	0.00107371	-0.513479	14.1817	16.2288	15.0754	12.8463	12.9976	19.2995	22.3793	19.155	12.0621	12.9935	10.1481	7.24552	10.5354	11.1198
ENSMUSG00000023034	FFI	SST	Nr4a1	15370	6.75193e-05	0.00439567	-0.520598	20.6167	29.0874	32.0159	19.7809	32.1617	64.3511	62.8009	65.7385	29.5986	46.5232	24.4905	16.0491	30.6658	28.0088
ENSMUSG00000005198	FFI	SST	Polr2a	20020	6.4224e-06	0.000801059	-0.525513	16.4739	17.678	17.478	14.63	19.1393	25.6574	29.6899	24.4205	13.1245	18.5383	13.7377	10.7701	13.1541	14.1713
ENSMUSG00000047193	FFI	SST	Dync2h1	110350	4.44183e-05	0.00342663	-0.526176	4.14606	4.9896	4.40095	3.63937	5.39017	5.22673	6.39784	8.31902	3.66117	3.99613	3.17081	1.81689	3.46111	2.44571
ENSMUSG00000038473	FFI	SST	Nos1ap	70729	1.5546e-05	0.00150245	-0.53049	53.1324	54.0847	51.6836	46.0457	46.0564	68.6484	98.9496	71.0341	40.0945	48.1866	30.091	32.6784	41.9969	45.3547
ENSMUSG00000005580	FFI	SST	Adcy9	11515	1.18764e-05	0.00124186	-0.538631	7.93776	10.05	8.68104	7.19128	6.19275	12.0182	10.6403	11.2818	4.9508	7.75963	5.74258	4.50422	5.02893	5.8616
ENSMUSG00000021066	FFI	SST	Atl1	73991	1.11721e-05	0.00119283	-0.542446	119.625	171.348	145.632	107.24	137.471	238.563	192.154	229.964	95.9217	146.874	101.376	86.8885	90.9602	133.273
ENSMUSG00000021708	FFI	SST	Rasgrf2	19418	1.34502e-06	0.000256438	-0.542574	55.0351	51.0197	44.2528	48.687	58.7628	59.7956	72.2337	84.3806	42.7711	40.4777	45.0935	29.4585	38.3101	31.6386
ENSMUSG00000030209	FFI	SST	Grin2b	14812	1.72673e-07	5.12109e-05	-0.542807	21.9252	20.8716	23.0346	21.9663	16.49	24.9196	33.2122	37.5874	17.23	18.9572	19.0657	14.1839	17.9775	16.3921
ENSMUSG00000017485	FFI	SST	Top2b	21974	8.00677e-07	0.000190469	-0.5439	48.0265	54.5358	36.7666	38.1762	42.7811	57.2929	63.7623	91.4905	44.5202	39.7969	36.9282	32.8739	35.3464	34.8494
ENSMUSG00000025262	FFI	SST	Fam120c	207375	5.14407e-06	0.000673066	-0.545092	3.26403	4.03979	3.72204	5.32116	5.34452	6.93982	7.03443	9.54142	4.08911	4.6765	4.68525	3.28802	3.42729	3.58789
ENSMUSG00000060176	FFI	SST	Kif27	75050	8.12431e-06	0.000959531	-0.547018	2.97857	3.12333	3.54058	2.34092	2.19955	4.17153	4.87296	5.2492	2.31747	2.61842	2.68209	1.9049	2.56671	2.09194
ENSMUSG00000040125	FFI	SST	Gpr26	233919	1.26576e-08	5.11905e-06	-0.551169	32.6561	28.9853	32.0984	25.4818	23.9718	34.9638	40.0905	45.8051	22.7469	23.648	22.351	17.5243	24.821	22.3917
ENSMUSG00000020115	FFI	SST	Tbk1	56480	4.20104e-06	0.000596458	-0.553522	31.0467	30.1405	28.1041	28.9174	49.6289	38.8205	49.1229	75.4933	29.725	29.8194	26.7068	22.1208	26.4112	27.9045
ENSMUSG00000048732	FFI	SST	Klhl11	217194	4.79387e-05	0.00360543	-0.559025	2.76807	4.34825	2.40881	2.91312	3.15296	4.95421	5.58738	5.51179	2.49535	3.03735	2.60959	1.87419	1.89543	1.51979
ENSMUSG00000033004	FFI	SST	Mycbp2	105689	1.04899e-05	0.00112902	-0.561288	99.4287	93.604	88.1486	78.2231	106.853	130.715	163.931	160.681	84.5039	91.7547	72.3708	44.0809	86.1712	58.6286
ENSMUSG00000063870	FFI	SST	Chd4	107932	1.41438e-06	0.000262171	-0.566704	78.9054	86.223	78.6576	70.2446	89.4367	105.233	126.315	128.271	68.5389	76.4564	57.5241	42.582	56.4098	65.6804
ENSMUSG00000072966	FFI	SST	Gprasp2	245607	5.75374e-07	0.000142203	-0.567051	110.18	93.5851	73.1433	109.354	113.107	138.334	174.225	198.961	106.226	79.2065	102.218	81.5418	86.3624	72.8982
ENSMUSG00000031732	FFI	SST	Phlpp2	244650	2.66264e-10	1.54503e-07	-0.570981	19.1138	19.9917	18.4419	17.2436	17.6096	23.7131	26.2701	30.3982	15.2696	16.1418	15.2473	12.4886	15.0738	14.714
ENSMUSG00000055567	FFI	SST	Unc80	329178	6.81495e-06	0.000834425	-0.57389	43.4056	32.0361	26.3987	41.8395	31.2545	43.9265	64.5067	75.5501	36.5664	31.0905	32.4658	22.6177	31.5712	20.5573
ENSMUSG00000103332	FFI	SST	Pcdhga2	93710	1.92971e-06	0.000338866	-0.577245	4.24043	4.77387	4.35774	3.07038	3.70069	4.91983	5.86387	6.0456	3.2497	3.02674	3.0853	2.47578	2.54684	2.35083
ENSMUSG00000021256	FFI	SST	Vash1	238328	6.30866e-06	0.000794296	-0.580821	6.19194	9.70083	8.52394	8.70549	6.10119	15.2839	16.0983	13.8634	6.51614	9.01625	6.77769	5.54532	6.43747	8.80894
ENSMUSG00000007653	FFI	SST	Gabrb2	14401	9.84619e-06	0.00107371	-0.58167	20.9989	18.979	13.1266	20.5066	12.8616	21.7204	31.5427	38.0709	14.674	14.1371	17.5073	15.5449	11.7309	9.84886
ENSMUSG00000042699	FFI	SST	Dhx9	13211	4.91674e-07	0.000126077	-0.583346	64.595	52.9567	47.1422	56.4208	59.6303	72.7479	99.6684	115.845	56.7573	49.951	52.6014	42.9647	51.6907	38.2351
ENSMUSG00000020850	FFI	SST	Prpf8	192159	3.69828e-06	0.000573921	-0.589683	52.1857	62.0817	57.1231	39.2059	64.6651	91.8123	96.8246	79.5438	43.553	59.0279	42.0622	28.3714	40.9663	44.7848
ENSMUSG00000030180	FFI	SST	Kdm5a	214899	1.06308e-06	0.000218276	-0.593415	7.40175	7.94066	9.62619	8.72785	19.0877	14.6404	12.4613	16.0518	7.425	8.76179	7.90579	4.93004	6.95082	6.82861
ENSMUSG00000019027	FFI	SST	Dnah1	110084	4.77365e-06	0.000643526	-0.603817	3.06908	5.1691	3.83385	3.85575	4.06178	6.83309	5.85814	9.1513	2.95057	3.61443	3.33277	2.88875	2.84366	4.39971
ENSMUSG00000040732	FFI	SST	Erg	13876	5.82144e-05	0.00402554	-0.61	1.41687	1.69583	1.17526	1.27405	0.740468	2.07039	2.32168	4.34067	1.28992	0.434805	0.709569	0.448989	0.816396	0.992362
ENSMUSG00000042425	FFI	SST	Frmpd3	245643	5.35674e-08	1.93219e-05	-0.611471	12.871	14.7465	13.9477	11.7961	14.8246	21.3606	24.042	22.5465	11.0722	14.5263	12.4486	9.39944	10.8139	11.3309
ENSMUSG00000078671	FFI	SST	Chd2	244059	8.93996e-07	0.00019244	-0.618272	22.4931	22.1844	25.1719	21.1838	21.6228	33.2354	34.2063	53.0333	21.137	22.8974	19.8971	15.282	20.9212	14.826
ENSMUSG00000021448	FFI	SST	Shc3	20418	8.59195e-06	0.000997115	-0.627381	8.31921	8.10246	9.84523	8.20542	3.38513	13.11	19.7748	12.2237	5.388	7.36788	6.78274	5.08668	6.0756	8.09178
ENSMUSG00000033458	FFI	SST	Fan1	330554	2.07747e-06	0.00035546	-0.630684	3.78548	5.52541	4.53361	2.91667	3.24878	4.76955	5.8598	6.71491	2.97217	2.60394	2.3006	2.13015	2.65372	3.17795
ENSMUSG00000061414	FFI	SST	Cracr2a	381812	3.8168e-05	0.00301414	-0.634365	0.849788	0.524449	0.803621	0.527964	0.980873	0.718578	0.906693	2.0107	0.416243	0.395041	0.430962	0.26653	0.34141	0.363654
ENSMUSG00000031561	FFI	SST	Tenm3	23965	3.49656e-07	9.52348e-05	-0.643792	9.01299	11.1205	8.52969	8.41121	9.18061	13.5406	15.7842	17.3358	6.9363	10.1852	8.00212	5.57194	7.0321	6.69478
ENSMUSG00000044072	FFI	SST	Eml6	237711	5.0068e-07	0.000126077	-0.646663	9.40627	8.41854	8.52566	10.483	9.44086	12.202	13.2811	20.1909	8.54184	6.70821	7.33718	5.39876	7.99666	6.64244
ENSMUSG00000061578	FFI	SST	Ksr2	333050	1.00517e-07	3.34334e-05	-0.664367	10.7642	12.6302	13.1792	12.499	11.8121	16.8901	20.5892	22.3338	9.86873	10.0825	10.3394	6.31103	9.21026	11.1972
ENSMUSG00000078161	FFI	SST	Erich3	209601	3.80075e-09	1.8787e-06	-0.696247	18.5751	18.6968	16.9641	17.2878	15.2462	26.3684	30.035	33.4676	16.5337	16.6135	14.547	10.4809	15.0771	13.5333
ENSMUSG00000026490	FFI	SST	Cdc42bpa	226751	9.765e-10	5.43015e-07	-0.701847	118.138	117.065	112.902	99.2421	123.459	150.692	176.726	203.889	97.3683	96.4424	84.4513	62.5069	92.0647	83.3407
ENSMUSG00000052415	FFI	SST	Tchh	99681	7.58791e-09	3.26672e-06	-0.747715	8.95534	9.82271	9.81794	9.87587	8.40245	10.9712	15.6267	14.8199	7.73206	6.69644	6.54513	4.92536	6.21971	5.66805
ENSMUSG00000047976	FFI	SST	Kcna1	16485	1.57638e-06	0.000284303	-0.751977	11.4665	12.188	7.17232	11.4828	4.49905	10.8538	16.3363	23.3001	7.44177	5.56832	8.71921	6.94777	5.2122	5.24228
ENSMUSG00000043384	FFI	SST	Gprasp1	67298	2.66192e-10	1.54503e-07	-0.755729	203.001	191.395	174.034	190.244	260.008	333.52	399.849	370.068	189.145	186.328	202.181	132.8	180.529	146.939
ENSMUSG00000031189	FFI	SST	Aff2	14266	9.24238e-06	0.00104533	-0.788511	0.947653	1.26147	1.34077	0.882861	0.974474	1.85579	2.51374	2.00714	0.500098	0.736049	0.764243	0.806556	0.718891	0.299318
ENSMUSG00000033624	FFI	SST	Pdpr	319518	5.18397e-11	3.84362e-08	-0.842169	4.44883	5.1079	3.9241	5.29307	2.79932	8.2811	7.74343	10.0223	3.80119	4.09902	3.96777	3.81442	3.2821	4.00445
ENSMUSG00000038738	FFI	SST	Shank1	243961	3.46318e-08	1.28388e-05	-0.886744	37.3211	47.8684	51.9422	52.1383	56.3298	66.2454	115.506	80.8528	27.1674	45.6279	41.7762	29.2301	32.026	30.5301
ENSMUSG00000020154	FFI	SST	Ptprb	19263	2.56011e-07	7.11817e-05	-0.910061	1.60326	1.56143	0.998071	1.56187	1.08561	1.38018	1.36889	2.57146	0.746638	0.595506	0.65345	0.479311	0.779182	0.523219
ENSMUSG00000030102	FFI	SST	Itpr1	16438	4.12455e-09	1.96594e-06	-0.916938	166.415	144.246	193.363	162.135	168.047	200.309	267.539	386.024	139.321	113.433	125.74	82.6824	122.421	90.4643
ENSMUSG00000049804	FFI	SST	Armcx4	100503043	3.60349e-11	2.82895e-08	-0.932339	26.5341	21.6587	20.9418	24.2706	20.1299	33.4795	52.901	53.7199	22.045	20.9866	21.3385	15.4757	18.7703	16.8646
ENSMUSG00000043940	FFI	SST	Wdfy3	72145	4.47925e-14	5.978e-11	-0.966158	25.4823	27.0743	24.3181	26.0085	21.7735	35.1082	44.467	46.5304	19.5498	19.195	20.3868	13.8972	16.5111	15.7535
ENSMUSG00000024991	FFI	SST	Eif3a	13669	7.23481e-14	8.7778e-11	-1.04929	207.98	258.434	241.117	194.72	212.735	349.078	372.955	476.477	164.856	187.934	154.723	111.219	146.654	173.68
ENSMUSG00000029516	FFI	SST	Cit	12704	6.5841e-16	1.09839e-12	-1.08474	23.7699	26.6616	25.4244	22.3386	28.4099	48.2475	54.7051	45.3771	18.74	22.4361	18.9553	14.7476	20.1835	20.954
ENSMUSG00000078899	FFI	SST	Gm14430	627914	2.50663e-10	1.54503e-07	-1.15627	39.3142	30.3466	31.7099	48.3606	36.2972	34.2872	56.4751	62.7277	20.3966	13.2027	19.7194	16.4433	21.2326	12.7968
ENSMUSG00000078878	FFI	SST	Gm14305	100043387	0.000295764	0.0125583	-1.22807	19.7948	12.2706	13.0134	37.5731	21.7754	19.6341	34.4903	43.3706	0.860566	0	0	0.115145	0	0
ENSMUSG00000034584	FFI	SST	Exph5	320051	1.28753e-09	6.87337e-07	-1.39288	1.12059	1.0113	1.28975	0.969763	1.89112	1.52924	1.77119	1.98636	0.479713	0.663535	0.404869	0.401803	0.571257	0.376763
ENSMUSG00000095362	FFI	SST	Gm14325	329575	0.000210128	0.00997997	-1.47928	20.503	28.627	29.6645	42.9045	15.3916	36.7923	38.5898	50.6469	1.95022	0	0	0	0.080312	0
ENSMUSG00000040380	FFI	SST	Cbln3	56410	2.63951e-06	0.000429596	-1.61694	1.06275	0.463279	15.6011	24.6814	2.84698	3.11945	11.661	5.83289	2.93224	0.653917	1.04494	0.832423	0.485408	0.462975
ENSMUSG00000078862	FFI	SST	Gm14326	665211	0.00014763	0.00781854	-1.66401	15.8649	28.8121	27.7768	27.5135	9.18443	24.3963	30.2189	26.8921	0.093573	0	0	0	0.080999	1.33358
ENSMUSG00000078897	FFI	SST	Gm4724	100043915	2.19956e-11	1.83471e-08	-2.57006	13.9435	11.8306	10.8961	31.9235	18.4079	14.4735	29.4393	29.3972	3.76489	3.77848	2.56851	1.59877	2.4274	6.44936
ENSMUSG00000078870	FFI	SST	Gm14410	100043403	4.40919e-13	4.52654e-10	-3.40531	14.8343	19.5641	9.2608	25.5569	24.8427	20.1785	30.9565	70.251	2.22803	4.24705	1.28807	1.84399	3.14868	6.49803
ENSMUSG00000078894	FFI	SST	2210418O10Rik	100504263	5.75925e-33	3.84315e-29	-6.65208	0	3.49987	2.4855	5.38443	0	3.2159	4.8772	5.87938	0.007448	0.024661	0.044819	0	0.030638	0.118523
ENSMUSG00000078867	FFI	SST	Gm14418	668066	3.36327e-25	1.12216e-21	-7.34676	4.70713	6.51581	4.6796	8.88821	14.2116	7.82009	10.4379	10.7538	0.087808	0	0.150808	0	0.109703	0
ENSMUSG00000074527	FFI	SST	Gm14296	102639598	2.32547e-14	3.44841e-11	-7.92076	9.05942	10.2906	8.91312	15.2847	13.6046	11.4656	17.2631	28.1309	0.018358	0.024661	0.010926	0.147671	0.150676	0
ENSMUSG00000074519	FFI	SST	Zfp971	626848	2.50912e-08	9.84905e-06	-8.05076	8.07005	2.80732	5.41473	11.5509	7.26983	7.17181	16.2953	20.1106	0	0	0	0	0.218027	0
ENSMUSG00000078864	FFI	SST	Gm14322	626802	4.57746e-20	1.22182e-16	-8.68293	6.37112	8.85164	9.67909	13.588	6.2982	7.90143	14.0488	19.5591	0	0	0	0	0.161239	0
ENSMUSG00000078877	FFI	SST	Gm14295	100039123	5.98978e-17	1.14199e-13	-9.02596	13.3741	21.5847	18.0869	29.5755	15.6478	9.34995	20.3733	70.4602	0	0	0.127318	0.066372	0.148514	0
ENSMUSG00000078866	FFI	SST	Zfp970	628308	2.89007e-33	3.84315e-29	-10.6593	9.53222	19.0604	14.1283	21.7621	25.5513	19.598	18.5194	29.1626	0	0	0	0	0	0

## Sheet: CJD_vGluT2_Cb
Ensembl	Disease	Celltype	symbol	Entrez	pvalue	padj	sLFC	BK114.D	BK115.D	BK116.D	BK117.D	BK118.D	BK119.D	U67.D	U68.D	U69.D	U82.D	U83.D	BE264.D	BE265.D	BE267.D	BE268.D
ENSMUSG00000011171	CJD	VglutCb	Vipr2	22355	1.9032e-08	0.000129361	-1.52022	0.919828	1.3701	2.26606	1.94972	1.00668	1.87523	5.17596	6.51868	3.98946	2.74011	3.59971	1.29846	1.85352	1.67447	0.693237
ENSMUSG00000026605	CJD	VglutCb	Cenpf	108000	1.8744e-10	2.54806e-06	-3.99382	0.053987	0.050749	0.039615	0.055638	0.125722	0.032283	0.553109	2.2572	1.99608	0.23881	0.116688	1.83799	2.95197	0.08865	0.47169

## Sheet: FFI_vGluT2_Cb
Ensembl	Disease	Celltype	symbol	Entrez	pvalue	padj	sLFC	BK114.D	BK115.D	BK116.D	BK117.D	BK118.D	BK119.D	U67.D	U68.D	U69.D	U82.D	U83.D	BE264.D	BE265.D	BE267.D	BE268.D
ENSMUSG00000002900	FFI	VglutCb	Lamb1	16777	3.71982e-07	0.000626897	0.785603	1.56273	1.98837	7.67672	3.27952	5.17294	5.94321	2.6984	3.10179	2.45121	3.22535	2.28472	4.76382	3.8576	6.66075	4.92642
ENSMUSG00000011171	FFI	VglutCb	Vipr2	22355	4.11529e-07	0.000626897	-1.40001	0.919828	1.3701	2.26606	1.94972	1.00668	1.87523	5.17596	6.51868	3.98946	2.74011	3.59971	1.29846	1.85352	1.67447	0.693237
ENSMUSG00000021068	FFI	VglutCb	Nin	18080	5.60022e-05	0.042655	0.439856	0.682398	2.37455	1.85816	1.70964	1.37281	2.81888	1.42272	1.65741	0.960032	1.57094	1.23515	1.95551	2.82433	3.03559	2.14938
ENSMUSG00000021279	FFI	VglutCb	Cdc42bpb	217866	9.41427e-06	0.0117336	0.587011	126.717	106.936	189.254	124.654	115.944	132.561	130.822	103.652	108.123	106.092	94.2726	195.073	202.269	201.296	123.038
ENSMUSG00000024026	FFI	VglutCb	Glo1	109801	4.42178e-10	1.51557e-06	0.856982	308.381	130.467	138.902	151.811	134.59	130.798	151.873	137.759	143.111	155.332	156.34	303.272	189.321	301.833	325.543
ENSMUSG00000024027	FFI	VglutCb	Glp1r	14652	8.45383e-10	1.9317e-06	1.91396	0.828423	0.013092	0.05475	0.144256	0.177169	0.104209	0.13308	0.094032	0.131937	0.134116	0.15142	0.526841	0.564786	0.590579	0.467801
ENSMUSG00000024960	FFI	VglutCb	Plcb3	18797	4.54465e-05	0.0366513	0.367415	24.1942	20.0998	56.3046	22.1451	22.3718	43.2503	24.3392	20.3684	16.1223	27.3747	19.9108	36.0878	31.911	34.5464	27.4754
ENSMUSG00000024985	FFI	VglutCb	Tcf7l2	21416	2.12081e-05	0.0193842	-1.47999	0.807868	0.544317	0.495202	37.1361	0.233934	0.406201	0.537297	6.17078	25.7774	0.584803	23.9258	0.533894	0.277043	0.577051	0.533601
ENSMUSG00000029381	FFI	VglutCb	Shroom3	27428	1.56705e-05	0.0179036	0.725459	1.14617	1.14084	0.724248	0.881384	1.24232	0.957223	0.672167	0.753859	0.738125	1.04377	1.07703	1.51451	2.49718	1.96306	1.43084
ENSMUSG00000030905	FFI	VglutCb	Crym	12971	9.62778e-50	1.31997e-45	6.73996	0.04051	0	0	0.210988	0.151405	0	0.065075	0.391461	0.176921	0	0.059499	16.8513	11.0524	16.7189	20.1428
ENSMUSG00000032612	FFI	VglutCb	Usp4	22258	2.4431e-05	0.0209343	0.331973	79.4763	66.5542	133.882	98.2245	89.4758	123.866	83.8367	84.9799	78.8851	94.316	89.7745	115.087	126.144	134.201	101.014
ENSMUSG00000032796	FFI	VglutCb	Lama1	16772	8.8202e-06	0.0117336	1.26436	0.184443	0.13069	1.15374	0.467173	1.1685	1.47674	0.506406	0.135655	0.19227	0.258328	0.159529	2.77534	0.329077	2.62954	0.452764
ENSMUSG00000040687	FFI	VglutCb	Madd	228355	1.21124e-07	0.00023723	0.456629	90.8156	105.554	184.162	112.997	100.749	150.918	101.412	96.9852	81.2812	105.063	89.9869	126.399	122.532	152.47	122.301
ENSMUSG00000041891	FFI	VglutCb	Lman1	70361	1.01895e-14	6.98489e-11	-1.29868	18.4472	14.127	21.9567	20.8292	20.9307	23.87	20.8427	18.1594	15.8704	22.895	16.7017	6.38733	4.86297	9.0991	8.73146
ENSMUSG00000042743	FFI	VglutCb	Sgtb	218544	1.77271e-05	0.0186953	-0.350749	10.9517	11.0573	16.5651	14.3382	14.2914	15.5892	15.1109	13.9849	14.4397	15.1853	16.1096	10.3043	8.87665	12.1174	11.3675
ENSMUSG00000053310	FFI	VglutCb	Nrgn	64011	6.49582e-05	0.0468724	-0.900452	8.73015	1.0344	2.10571	225.931	4.03702	3.19884	1.1383	86.5522	419.244	0.438696	191.524	3.8561	1.84567	3.18659	2.97894
ENSMUSG00000057738	FFI	VglutCb	Sptan1	20740	1.96496e-05	0.0192426	0.601085	384.494	655.653	1428.57	539.876	778.267	1048.64	592.058	370.228	495.54	556.589	517.603	712.452	1149.2	1271.68	630.987
ENSMUSG00000078879	FFI	VglutCb	Zfp973	545490	1.12511e-11	5.14177e-08	-5.34528	1.02674	0.849815	5.72527	1.9331	8.13133	4.20027	7.43781	4.02122	4.37158	1.68511	1.15712	0	0	0.227325	0.169166
ENSMUSG00000102483	FFI	VglutCb	Catspere1	631584	6.5966e-10	1.80879e-06	6.81576	0.144263	0.101146	0	0	0	0.107517	0	0	0	0	0	0.26125	0.261794	0.45993	0.333818

[truncated: 2 more sheets: CJD_vGluT2_Cer, FFI_vGluT2_Cer]
