# Supplementary material for: Translatome profiling in fatal familial insomnia implicates TOR signaling in somatostatin neurons
Source: Life Sci Alliance. 2022 Oct 3;5(11):e202201530. doi: 10.26508/lsa.202201530 (PMC9531780; doi:10.26508/lsa.202201530)
Supplement: Supplementary file 3 [file LSA-2022-01530_TableS3.xlsx]

## Sheet: CJD_SST
	Term	Overlap	P.value	Adjusted.P.value	Old.P.value	Old.Adjusted.P.value	Odds.Ratio	Combined.Score	Genes	Direction
GO_Biological_Process_2021.1	SRP-dependent cotranslational protein targeting to membrane (GO:0006614)	26/90	3.49903983293215e-43	1.96646038610787e-40	0	0	158.19056372549	15464.4991798412	RPL31;RPL12;RPL36A;RPS4X;RPS15A;RPL14;RPL13;RPL37;RPS11;RPS27A;RPL17;RPS12;RPL41;RPL21;RPS8;RPS6;RPL35A;RPS26;RPS25;RPS27;RPS29;RPL27A;RPL37A;RPL26;RPS24;RPS23	up
GO_Biological_Process_2021.2	cytoplasmic translation (GO:0002181)	26/93	9.40918395607398e-43	2.43067245638883e-40	0	0	151.084577114428	14620.3748710166	RPL31;RPL12;RPL36A;RPS4X;RPS15A;RPL14;RPL13;RPL37;RPS11;RPS27A;RPL17;RPS12;RPL41;RPL21;RPS8;RPS6;RPL35A;RPS26;RPS25;RPS27;RPS29;RPL27A;RPL37A;RPL26;RPS24;RPS23	up
GO_Biological_Process_2021.3	cotranslational protein targeting to membrane (GO:0006613)	26/94	1.29751198739617e-42	2.43067245638883e-40	0	0	148.855247981546	14356.8096134854	RPL31;RPL12;RPL36A;RPS4X;RPS15A;RPL14;RPL13;RPL37;RPS11;RPS27A;RPL17;RPS12;RPL41;RPL21;RPS8;RPS6;RPL35A;RPS26;RPS25;RPS27;RPS29;RPL27A;RPL37A;RPL26;RPS24;RPS23	up
GO_Biological_Process_2021.4	protein targeting to ER (GO:0045047)	26/103	1.97466529320714e-41	2.77440473695604e-39	0	0	131.396995161701	12315.2608826913	RPL31;RPL12;RPL36A;RPS4X;RPS15A;RPL14;RPL13;RPL37;RPS11;RPS27A;RPL17;RPS12;RPL41;RPL21;RPS8;RPS6;RPL35A;RPS26;RPS25;RPS27;RPS29;RPL27A;RPL37A;RPL26;RPS24;RPS23	up
GO_Biological_Process_2021.5	nuclear-transcribed mRNA catabolic process, nonsense-mediated decay (GO:0000184)	26/113	2.99045161678337e-40	3.36126761726451e-38	0	0	116.235294117647	10578.3392411466	RPL31;RPL12;RPL36A;RPS4X;RPS15A;RPL14;RPL13;RPL37;RPS11;RPS27A;RPL17;RPS12;RPL41;RPL21;RPS8;RPS6;RPL35A;RPS26;RPS25;RPS27;RPS29;RPL27A;RPL37A;RPL26;RPS24;RPS23	up
GO_Biological_Process_2021.6	peptide biosynthetic process (GO:0043043)	26/162	8.41712346303348e-36	7.88403897704136e-34	0	0	74.1727220299885	5990.39635942944	RPL31;RPL12;RPL36A;RPS4X;RPS15A;RPL14;RPL13;RPL37;RPS11;RPS27A;RPL17;RPS12;RPL41;RPL21;RPS8;RPS6;RPL35A;RPS26;RPS25;RPS27;RPS29;RPL27A;RPL37A;RPL26;RPS24;RPS23	up
GO_Biological_Process_2021.7	nuclear-transcribed mRNA catabolic process (GO:0000956)	26/171	3.77741571440001e-35	3.03272518784686e-33	0	0	69.5372549019608	5511.62282870017	RPL31;RPL12;RPL36A;RPS4X;RPS15A;RPL14;RPL13;RPL37;RPS11;RPS27A;RPL17;RPS12;RPL41;RPL21;RPS8;RPS6;RPL35A;RPS26;RPS25;RPS27;RPS29;RPL27A;RPL37A;RPL26;RPS24;RPS23	up
GO_Biological_Process_2021.8	translation (GO:0006412)	26/214	1.76317816472319e-32	1.23863266071804e-30	0	0	53.5158531497705	3912.84398119629	RPL31;RPL12;RPL36A;RPS4X;RPS15A;RPL14;RPL13;RPL37;RPS11;RPS27A;RPL17;RPS12;RPL41;RPL21;RPS8;RPS6;RPL35A;RPS26;RPS25;RPS27;RPS29;RPL27A;RPL37A;RPL26;RPS24;RPS23	up
GO_Biological_Process_2021.9	gene expression (GO:0010467)	27/356	4.19609056703745e-28	2.62022544297228e-26	0	0	32.1603647416413	2027.33244790059	RPL31;RPL12;RPL36A;RPS4X;RPS15A;RPL14;RPL13;RPL37;RPS11;RPS27A;RPL17;RPS12;RPL41;RPL21;RPS8;RPS6;RPL35A;RPS26;TSPAN15;RPS25;RPS27;RPS29;RPL27A;RPL37A;RPL26;RPS24;RPS23	up
GO_Biological_Process_2021.10	cellular macromolecule biosynthetic process (GO:0034645)	26/314	4.93371531735531e-28	2.77274800835369e-26	0	0	34.7569444444444	2185.38772832711	RPL31;RPL12;RPL36A;RPS4X;RPS15A;RPL14;RPL13;RPL37;RPS11;RPS27A;RPL17;RPS12;RPL41;RPL21;RPS8;RPS6;RPL35A;RPS26;RPS25;RPS27;RPS29;RPL27A;RPL37A;RPL26;RPS24;RPS23	up
GO_Biological_Process_2021.11	cellular protein metabolic process (GO:0044267)	26/417	7.97078409762782e-25	4.07234605715167e-23	0	0	25.4667268441904	1413.11924465449	RPL31;RPL12;RPL36A;RPS4X;RPS15A;RPL14;RPL13;RPL37;RPS11;RPS27A;RPL17;RPS12;RPL41;RPL21;RPS8;RPS6;RPL35A;RPS26;RPS25;RPS27;RPS29;RPL27A;RPL37A;RPL26;RPS24;RPS23	up
GO_Biological_Process_2021.12	rRNA processing (GO:0006364)	18/173	3.13202131339892e-21	1.46682998177516e-19	0	0	38.9091306724986	1837.00154844714	RPL41;RPL21;RPL31;RPL12;RPS6;RPL36A;RPL35A;RPS25;RPS27;LSM6;RPL27A;RPL37A;RPL14;RPL13;RPL37;RPL26;RPL17;RPS24	up
GO_Biological_Process_2021.13	rRNA metabolic process (GO:0016072)	17/162	3.80616841286028e-20	1.64543588309806e-18	0	0	38.6466666666667	1728.08874700675	RPL41;RPL21;RPL31;RPL12;RPS6;RPL36A;RPL35A;RPS25;RPS27;RPL27A;RPL37A;RPL14;RPL13;RPL37;RPL26;RPL17;RPS24	up
GO_Biological_Process_2021.14	ribosome biogenesis (GO:0042254)	17/192	7.21913164503584e-19	2.89796570322153e-17	0	0	31.9729523809524	1335.58638346601	RPL41;RPL21;RPL31;RPL12;RPS6;RPL36A;RPL35A;RPS25;RPS27;RPL27A;RPL37A;RPL14;RPL13;RPL37;RPL26;RPL17;RPS24	up
GO_Biological_Process_2021.15	ncRNA processing (GO:0034470)	17/201	1.58537460442156e-18	5.93987018456611e-17	0	0	30.3951992753623	1245.76885179819	RPL41;RPL21;RPL31;RPL12;RPS6;RPL36A;RPL35A;RPS25;RPS27;RPL27A;RPL37A;RPL14;RPL13;RPL37;RPL26;RPL17;RPS24	up
GO_Biological_Process_2021.16	ribonucleoprotein complex biogenesis (GO:0022613)	6/60	1.13348832816971e-07	3.98137775269609e-06	0	0	31.093896713615	497.278339436485	RPS25;RPS6;RPL14;RPL35A;RPL26;RPS24	up
GO_Biological_Process_2021.17	ribosomal small subunit biogenesis (GO:0042274)	5/40	4.3906284418382e-07	1.45149010841945e-05	0	0	39.4603174603175	577.644721853346	RPS25;LSM6;RPS27;RPS6;RPS24	up
GO_Biological_Process_2021.18	positive regulation of axonogenesis (GO:0050772)	4/43	2.23599470917534e-05	0.000698127236975857	0	0	27.9367755532139	299.153677220392	GOLGA4;METRN;PLXNB3;DBN1	up
GO_Biological_Process_2021.19	actin filament organization (GO:0007015)	5/152	0.000301955842932645	0.00852599136608541	0	0	9.34240362811791	75.722327979472	SPTA1;GSN;MPRIP;LCP1;DBN1	up
GO_Biological_Process_2021.20	L-alanine transport (GO:0015808)	2/7	0.000303416062850014	0.00852599136608541	0	0	106.229333333333	860.500681267514	SLC36A1;SLC38A3	up
GO_Biological_Process_2021.21	supramolecular fiber organization (GO:0097435)	7/351	0.000405124159579992	0.0108418941754265	0	0	5.69156976744186	44.4586555159101	SPTA1;TSPAN15;GSN;MPRIP;MYH11;RPS27A;DBN1	up
GO_Biological_Process_2021.22	alanine transport (GO:0032328)	2/10	0.000645324195743907	0.0157683564351337	0	0	66.3833333333333	487.635884533048	SLC36A1;SLC38A3	up
GO_Biological_Process_2021.23	regulation of podosome assembly (GO:0071801)	2/10	0.000645324195743907	0.0157683564351337	0	0	66.3833333333333	487.635884533048	GSN;LCP1	up
GO_Biological_Process_2021.24	axon guidance (GO:0007411)	5/203	0.00112076547503463	0.0262445915403943	0	0	6.91813973063973	47.000065908916	SPTA1;FEZ1;PLXNB3;NEXN;SPTAN1	up
GO_Biological_Process_2021.25	ribosomal large subunit biogenesis (GO:0042273)	3/57	0.00138255490562961	0.0310798342785536	0	0	14.9166666666667	98.2086798166777	RPL14;RPL35A;RPL26	up
GO_Biological_Process_2021.26	amyloid fibril formation (GO:1990000)	3/63	0.00184560533381982	0.0398934691387207	0	0	13.4209459459459	84.4841563183248	TSPAN15;GSN;RPS27A	up
GO_Biological_Process_2021.27	positive regulation of axon extension (GO:0045773)	2/22	0.00321502285685152	0.0669201053907613	0	0	26.5373333333333	152.322191891723	GOLGA4;DBN1	up
GO_Biological_Process_2021.28	histone lysine demethylation (GO:0070076)	2/26	0.00447850832890917	0.0898900600302484	0	0	22.11	119.581166684057	KDM5D;UTY	up
GO_Biological_Process_2021.29	L-amino acid transport (GO:0015807)	2/28	0.00518301623666977	0.0970951708336136	0	0	20.4071794871795	107.39009048923	SLC36A1;SLC38A3	up
GO_Biological_Process_2021.30	neutral amino acid transport (GO:0015804)	2/28	0.00518301623666977	0.0970951708336136	0	0	20.4071794871795	107.39009048923	SLC36A1;SLC38A3	up
GO_Cellular_Component_2021.1	cytosolic small ribosomal subunit (GO:0022627)	13/40	1.55500067074255e-22	1.5861006841574e-20	0	0	149.680555555556	7516.26838103405	RPS8;RPS6;RPS4X;RPS26;RPS25;RPS15A;RPS27;RPS29;RPS11;RPS27A;RPS24;RPS12;RPS23	up
GO_Cellular_Component_2021.2	small ribosomal subunit (GO:0015935)	13/45	9.29550047547567e-22	4.74070524249259e-20	0	0	126.26123046875	6114.49573655329	RPS8;RPS6;RPS4X;RPS26;RPS25;RPS15A;RPS27;RPS29;RPS11;RPS27A;RPS24;RPS12;RPS23	up
GO_Cellular_Component_2021.3	cytosolic large ribosomal subunit (GO:0022625)	13/55	1.79368166740816e-20	6.09851766918773e-19	0	0	96.1506696428571	4371.72399094493	RPL41;RPL21;RPL31;RPL12;RPL36A;RPL35A;RPL27A;RPL37A;RPL14;RPL13;RPL37;RPL26;RPL17	up
GO_Cellular_Component_2021.4	large ribosomal subunit (GO:0015934)	13/59	4.94351203778296e-20	1.26059556963465e-18	0	0	87.7720788043478	3901.78715058303	RPL41;RPL21;RPL31;RPL12;RPL36A;RPL35A;RPL27A;RPL37A;RPL14;RPL13;RPL37;RPL26;RPL17	up
GO_Cellular_Component_2021.5	ribosome (GO:0005840)	10/62	3.57255006115744e-14	7.28800212476118e-13	0	0	57.0350172215844	1765.97019965998	RPS4X;RPS26;RPS25;RPL41;RPS27;RPL31;RPS29;RPL36A;RPS11;RPS23	up
GO_Cellular_Component_2021.6	polysomal ribosome (GO:0042788)	6/30	1.47288106858889e-09	2.5038978166011e-08	0	0	70.0669014084507	1424.8836911394	RPS26;RPL41;RPL31;RPS29;RPL36A;RPS23	up
GO_Cellular_Component_2021.7	focal adhesion (GO:0005925)	12/387	2.75320958053314e-08	4.01181967449115e-07	0	0	9.62363076923077	167.52733095347	RPS4X;GSN;MPRIP;RPL31;RPS8;RPS29;RPL12;ANXA5;RPL37A;NEXN;LCP1;RPS11	up
GO_Cellular_Component_2021.8	cell-substrate junction (GO:0030055)	12/394	3.3525333614188e-08	4.27448003580897e-07	0	0	9.4438985098671	162.538601585268	RPS4X;GSN;MPRIP;RPL31;RPS8;RPS29;RPL12;ANXA5;RPL37A;NEXN;LCP1;RPS11	up
GO_Cellular_Component_2021.9	intracellular non-membrane-bounded organelle (GO:0043232)	16/1158	6.90800026606208e-06	7.82906696820369e-05	0	0	4.31362866412104	51.2581176481809	GSN;ABHD4;RPS6;RPL36A;ABHD5;RPS4X;RPS25;RPS27;LSM6;RPL13;LCP1;RPL26;RPS11;RPS27A;DBN1;RPS23	up
GO_Cellular_Component_2021.10	asymmetric synapse (GO:0032279)	5/133	0.000162347915413503	0.00165594873721773	0	0	10.7394748263889	93.710175437871	RPS25;RPS27;RPL12;RPL14;DBN1	up
GO_Cellular_Component_2021.11	postsynaptic density (GO:0014069)	5/138	0.000192889749312398	0.00170471676697947	0	0	10.3331244778613	88.3832619641375	RPS25;RPS27;RPL12;RPL14;DBN1	up
GO_Cellular_Component_2021.12	myosin filament (GO:0032982)	2/6	0.000217267823242482	0.00170471676697947	0	0	132.793333333333	1120.02940252356	MYH14;MYH10	up
GO_Cellular_Component_2021.13	rough endoplasmic reticulum membrane (GO:0030867)	2/6	0.000217267823242482	0.00170471676697947	0	0	132.793333333333	1120.02940252356	RPS26;RPS29	up
GO_Cellular_Component_2021.14	podosome (GO:0002102)	2/13	0.00111021758653117	0.00754947958841196	0	0	48.2715151515152	328.400736107959	GSN;LCP1	up
GO_Cellular_Component_2021.15	cytoplasmic side of endoplasmic reticulum membrane (GO:0098554)	2/13	0.00111021758653117	0.00754947958841196	0	0	48.2715151515152	328.400736107959	RPS26;RPS29	up
GO_Cellular_Component_2021.16	actin cytoskeleton (GO:0015629)	6/316	0.0013728310810109	0.00875179814144447	0	0	5.34656974102681	35.2386005846542	SPTA1;GSN;MPRIP;NEXN;LCP1;DBN1	up
GO_Cellular_Component_2021.17	cytoskeleton (GO:0005856)	7/600	0.00829261196318706	0.0497556717791224	0	0	3.25969645868465	15.621737642257	SPTA1;GSN;MPRIP;NEXN;LCP1;SPTAN1;DBN1	up
GO_Cellular_Component_2021.18	cortical actin cytoskeleton (GO:0030864)	2/42	0.0114028352733629	0.0646160665490567	0	0	13.2553333333333	59.3029462776502	GSN;DBN1	up
GO_Cellular_Component_2021.19	cytoplasmic side of plasma membrane (GO:0009898)	2/55	0.0190452193343102	0.0971306186049821	0	0	9.99748427672956	39.5994269980068	PTP4A1;SPTA1	up
GO_Cellular_Component_2021.20	tertiary granule lumen (GO:1904724)	2/55	0.0190452193343102	0.0971306186049821	0	0	9.99748427672956	39.5994269980068	FTH1;SPTAN1	up
GO_Molecular_Function_2021.1	RNA binding (GO:0003723)	30/1406	1.58711795281877e-15	1.60298913234696e-13	0	0	8.60356877783276	293.182579763443	DDX3Y;RPL31;RPL12;BCCIP;RPL36A;RPS4X;RPS15A;RPL14;RPL13;RPL37;RPS11;RPS27A;MYH10;RPL17;RPS12;RPL41;RPL21;RPS8;RPS6;RPL35A;RPS26;RPS25;RPS27;LSM6;RPL27A;RPL37A;ERH;RPL26;RPS24;RPS23	up
GO_Molecular_Function_2021.2	mRNA 5'-UTR binding (GO:0048027)	3/25	0.000118723751453218	0.00599554944838752	0	0	36.6726044226044	331.473079589783	RPL41;RPL26;MYH10	up
GO_Molecular_Function_2021.3	lysophospholipid acyltransferase activity (GO:0071617)	2/8	0.000403545514588606	0.0108629572950224	0	0	88.52	691.803387452393	ABHD4;ABHD5	up
GO_Molecular_Function_2021.4	L-alanine transmembrane transporter activity (GO:0015180)	2/9	0.000517550066809536	0.0108629572950224	0	0	75.8704761904762	574.066696535486	SLC36A1;SLC38A3	up
GO_Molecular_Function_2021.5	lipase inhibitor activity (GO:0055102)	2/10	0.000645324195743907	0.0108629572950224	0	0	66.3833333333333	487.635884533048	ANXA5;SNCB	up
GO_Molecular_Function_2021.6	phospholipase inhibitor activity (GO:0004859)	2/10	0.000645324195743907	0.0108629572950224	0	0	66.3833333333333	487.635884533048	ANXA5;SNCB	up
GO_Molecular_Function_2021.7	cation transmembrane transporter activity (GO:0008324)	3/48	0.00083779174563673	0.0118897454823598	0	0	17.9081081081081	126.874307780451	SLC36A1;SLC38A3;SLC39A1	up
GO_Molecular_Function_2021.8	alanine transmembrane transporter activity (GO:0022858)	2/12	0.000941762018404738	0.0118897454823598	0	0	53.1013333333333	369.99723747275	SLC36A1;SLC38A3	up
GO_Molecular_Function_2021.9	lysophosphatidic acid acyltransferase activity (GO:0042171)	2/15	0.00148708606698462	0.0152568805412463	0	0	40.8410256410256	265.913334082666	ABHD4;ABHD5	up
GO_Molecular_Function_2021.10	cadherin binding (GO:0045296)	6/322	0.00151058223180657	0.0152568805412463	0	0	5.24344802995186	34.0575588723519	RPS26;MPRIP;RPL14;SPTAN1;PRDX6;DBN1	up
GO_Molecular_Function_2021.11	cell adhesion mediator activity (GO:0098631)	2/24	0.00382225404465781	0.0350952416827671	0	0	24.1224242424242	134.287484539469	PLXNB3;NEXN	up
GO_Molecular_Function_2021.12	actin binding (GO:0003779)	4/177	0.00485669624076133	0.0402680492233574	0	0	6.25544381977987	33.3252317513942	GSN;LCP1;MYH10;DBN1	up
GO_Molecular_Function_2021.13	histone demethylase activity (GO:0032452)	2/28	0.00518301623666977	0.0402680492233574	0	0	20.4071794871795	107.39009048923	KDM5D;UTY	up
GO_Molecular_Function_2021.14	carboxylic ester hydrolase activity (GO:0052689)	3/96	0.00606497387222347	0.0437544543638979	0	0	8.64428945074106	44.1310429963081	ABHD4;ABHD5;PRDX6	up
GO_Molecular_Function_2021.15	neutral amino acid transmembrane transporter activity (GO:0015175)	2/32	0.00673375825668637	0.0453406389283549	0	0	17.6826666666667	88.424329437624	SLC36A1;SLC38A3	up
GO_Molecular_Function_2021.16	cell-cell adhesion mediator activity (GO:0098632)	2/42	0.0114028352733629	0.0719803976631036	0	0	13.2553333333333	59.3029462776502	PLXNB3;NEXN	up
GO_Molecular_Function_2021.17	amino acid transmembrane transporter activity (GO:0015171)	2/49	0.0153073111208605	0.0838918856514845	0	0	11.2771631205674	47.1320542463176	SLC36A1;SLC38A3	up
GO_Molecular_Function_2021.18	L-amino acid transmembrane transporter activity (GO:0015179)	2/53	0.0177603501826594	0.0838918856514845	0	0	10.3905882352941	41.8822461536842	SLC36A1;SLC38A3	up
GO_Molecular_Function_2021.19	mRNA binding (GO:0003729)	4/263	0.0187094307885507	0.0838918856514845	0	0	4.16015232453589	16.5521127157699	RPS26;RPL41;RPL26;MYH10	up
GO_Molecular_Function_2021.20	histone demethylase activity (H3-K27 specific) (GO:0071558)	1/5	0.0191040927721202	0.0838918856514845	0	0	65.5230263157895	259.330485674006	UTY	up
GO_Molecular_Function_2021.21	histone demethylase activity (H3-trimethyl-K4 specific) (GO:0034647)	1/5	0.0191040927721202	0.0838918856514845	0	0	65.5230263157895	259.330485674006	KDM5D	up
GO_Molecular_Function_2021.22	L-histidine transmembrane transporter activity (GO:0005290)	1/5	0.0191040927721202	0.0838918856514845	0	0	65.5230263157895	259.330485674006	SLC38A3	up
GO_Molecular_Function_2021.23	large ribosomal subunit rRNA binding (GO:0070180)	1/5	0.0191040927721202	0.0838918856514845	0	0	65.5230263157895	259.330485674006	RPL12	up
GO_Molecular_Function_2021.24	carboxylic acid transmembrane transporter activity (GO:0046943)	2/57	0.0203681165677928	0.0852698400461271	0	0	9.6329696969697	37.5087082308415	SLC36A1;SLC38A3	up
GO_Molecular_Function_2021.25	1-acylglycerophosphocholine O-acyltransferase activity (GO:0047184)	1/6	0.0228814709747459	0.0852698400461271	0	0	52.4157894736842	197.996861558196	PRDX6	up
GO_Molecular_Function_2021.26	oxidoreductase activity, acting on metal ions, oxygen as acceptor (GO:0016724)	1/7	0.0266444923046078	0.0852698400461271	0	0	43.6776315789474	158.338962731625	FTH1	up
GO_Molecular_Function_2021.27	L-proline transmembrane transporter activity (GO:0015193)	1/7	0.0266444923046078	0.0852698400461271	0	0	43.6776315789474	158.338962731625	SLC36A1	up
GO_Molecular_Function_2021.28	fatty acid elongase activity (GO:0009922)	1/7	0.0266444923046078	0.0852698400461271	0	0	43.6776315789474	158.338962731625	ELOVL1	up
GO_Molecular_Function_2021.29	ferric iron binding (GO:0008199)	1/7	0.0266444923046078	0.0852698400461271	0	0	43.6776315789474	158.338962731625	FTH1	up
GO_Molecular_Function_2021.30	ferroxidase activity (GO:0004322)	1/7	0.0266444923046078	0.0852698400461271	0	0	43.6776315789474	158.338962731625	FTH1	up
GO_Molecular_Function_2021.31	cuprous ion binding (GO:1903136)	1/8	0.030393210313471	0.0852698400461271	0	0	37.4360902255639	130.784330417173	SNCB	up
GO_Molecular_Function_2021.32	inositol hexakisphosphate kinase activity (GO:0000828)	1/8	0.030393210313471	0.0852698400461271	0	0	37.4360902255639	130.784330417173	ITPKA	up
GO_Molecular_Function_2021.33	L-glutamine transmembrane transporter activity (GO:0015186)	1/8	0.030393210313471	0.0852698400461271	0	0	37.4360902255639	130.784330417173	SLC38A3	up
GO_Molecular_Function_2021.34	ubiquitin ligase inhibitor activity (GO:1990948)	1/8	0.030393210313471	0.0852698400461271	0	0	37.4360902255639	130.784330417173	RPL37	up
GO_Molecular_Function_2021.35	calcium-independent phospholipase A2 activity (GO:0047499)	1/8	0.030393210313471	0.0852698400461271	0	0	37.4360902255639	130.784330417173	PRDX6	up
GO_Molecular_Function_2021.36	glycine transmembrane transporter activity (GO:0015187)	1/8	0.030393210313471	0.0852698400461271	0	0	37.4360902255639	130.784330417173	SLC36A1	up
GO_Molecular_Function_2021.37	phospholipase activity (GO:0004620)	2/73	0.0322445260351344	0.0861723880911175	0	0	7.45615023474178	25.6074544510727	ABHD4;PRDX6	up
GO_Molecular_Function_2021.38	histone demethylase activity (H3-K4 specific) (GO:0032453)	1/9	0.0341276784519277	0.0861723880911175	0	0	32.7549342105263	110.634590175398	KDM5D	up
GO_Molecular_Function_2021.39	aromatic amino acid transmembrane transporter activity (GO:0015173)	1/9	0.0341276784519277	0.0861723880911175	0	0	32.7549342105263	110.634590175398	SLC38A3	up
GO_Molecular_Function_2021.40	ubiquitin-protein transferase inhibitor activity (GO:0055105)	1/9	0.0341276784519277	0.0861723880911175	0	0	32.7549342105263	110.634590175398	RPL37	up
GO_Molecular_Function_2021.41	chloride channel inhibitor activity (GO:0019869)	1/10	0.0378479500125182	0.0910153083634367	0	0	29.1140350877193	95.3245466085723	VTI1B	up
GO_Molecular_Function_2021.42	fatty acid synthase activity (GO:0004312)	1/10	0.0378479500125182	0.0910153083634367	0	0	29.1140350877193	95.3245466085723	ELOVL1	up
GO_Molecular_Function_2021.43	semaphorin receptor activity (GO:0017154)	1/11	0.0415540781399269	0.0953854975484686	0	0	26.2013157894737	83.3400870527569	PLXNB3	up
GO_Molecular_Function_2021.44	myosin II binding (GO:0045159)	1/11	0.0415540781399269	0.0953854975484686	0	0	26.2013157894737	83.3400870527569	GSN	up
GO_Molecular_Function_2021.45	RNA stem-loop binding (GO:0035613)	1/12	0.0452461158046591	0.099476561852066	0	0	23.8181818181818	73.7324794714548	MYH10	up
GO_Molecular_Function_2021.46	calcium ion binding (GO:0005509)	4/348	0.0453061568831192	0.099476561852066	0	0	3.11866836572157	9.65013401526198	GSN;ANXA5;LCP1;SNCB	up
KEGG_2019_Mouse	Ribosome	26/170	3.2109787889762e-35	1.76603833393691e-33	0	0	70.0236928104575	5561.5549466475	RPL31;RPL12;RPL36A;RPS4X;RPS15A;RPL14;RPL13;RPL37;RPS11;RPS27A;RPL17;RPS12;RPL41;RPL21;RPS8;RPS6;RPL35A;RPS26;RPS25;RPS27;RPS29;RPL27A;RPL37A;RPL26;RPS24;RPS23	up
GO_Biological_Process_2021.110	neuron development (GO:0048666)	5/143	0.000214071361828376	0.0904732542097738	0	0	10.096958562972	85.3112337204473	BTG2;TENM2;TENM3;NEDD4;PTPRM	down
GO_Biological_Process_2021.210	peptidyl-tyrosine dephosphorylation (GO:0035335)	3/35	0.000316199206832705	0.0904732542097738	0	0	25.5462328767123	205.880619751611	PTPRT;DUSP1;DUSP6	down
GO_Biological_Process_2021.31	regulation of sodium ion transport (GO:0002028)	3/36	0.000344004768858456	0.0904732542097738	0	0	24.7708592777086	197.544011899645	NEDD4;SIK1;NOS1	down
GO_Biological_Process_2021.41	neuron projection development (GO:0031175)	5/171	0.0004877008339187	0.0961989894904636	0	0	8.38197861870015	63.9193628362977	BTG2;ARC;NEDD4;PTPRM;SHANK1	down
GO_Biological_Process_2021.51	cellular biogenic amine catabolic process (GO:0042402)	2/10	0.000628730143298291	0.0992136166124703	0	0	67.2837837837838	496.003163711321	COMT;ALDH7A1	down
GO_Cellular_Component_2021.110	apicolateral plasma membrane (GO:0016327)	2/5	0.000141450015722374	0.0114574512735123	0	0	179.468468468468	1590.73028300476	MTCL1;NEDD4	down
GO_Cellular_Component_2021.21	COPI vesicle coat (GO:0030126)	2/13	0.00108177702505077	0.0398248043046653	0	0	48.9262899262899	334.124982462056	COPB2;COPA	down
GO_Cellular_Component_2021.31	COPI-coated vesicle membrane (GO:0030663)	2/17	0.00186770114279618	0.0398248043046653	0	0	35.8720720720721	225.385912655691	COPB2;COPA	down
GO_Cellular_Component_2021.41	cytoskeleton (GO:0005856)	8/600	0.00196665700269952	0.0398248043046653	0	0	3.84181240063593	23.9399471314353	CENPE;ARC;PREPL;MTCL1;DHX9;NOS1;CDC42BPA;CIT	down
GO_Cellular_Component_2021.51	dendrite (GO:0030425)	5/270	0.00365922128519847	0.0592793848202153	0	0	5.22428913101249	29.3108998616237	TENM2;GRIK3;KIF1B;COMT;SHANK1	down
GO_Cellular_Component_2021.61	neuron projection (GO:0043005)	7/556	0.0051632307857473	0.0697036156075886	0	0	3.5802909110108	18.854502124927	GRIP1;TENM2;TENM3;GRIK3;KIF1B;COMT;SHANK1	down
GO_Cellular_Component_2021.71	vesicle coat (GO:0030120)	2/36	0.00825782035493459	0.0955547783928146	0	0	15.8108108108108	75.838049848767	COPB2;COPA	down
GO_Molecular_Function_2021.110	glucocorticoid receptor binding (GO:0035259)	2/9	0.000504224850205633	0.0342796277832143	0	0	76.8996138996139	583.859415579054	GRIP1;NR4A1	down
GO_Molecular_Function_2021.210	MAP kinase tyrosine/serine/threonine phosphatase activity (GO:0017017)	2/10	0.000628730143298291	0.0342796277832143	0	0	67.2837837837838	496.003163711321	DUSP1;DUSP6	down
GO_Molecular_Function_2021.310	protein tyrosine/threonine phosphatase activity (GO:0008330)	2/10	0.000628730143298291	0.0342796277832143	0	0	67.2837837837838	496.003163711321	DUSP1;DUSP6	down
GO_Molecular_Function_2021.47	MAP kinase phosphatase activity (GO:0033549)	2/12	0.000917606311061655	0.0342796277832143	0	0	53.8216216216216	376.414541799418	DUSP1;DUSP6	down
GO_Molecular_Function_2021.51	protein phosphatase binding (GO:0019903)	4/123	0.00124191263265024	0.0342796277832143	0	0	9.24603174603175	61.8661474441389	PTPRT;ANKLE2;TRAF3;JAK1	down
GO_Molecular_Function_2021.61	transcription regulatory region nucleic acid binding (GO:0001067)	5/212	0.00128101298305823	0.0342796277832143	0	0	6.70783153024427	44.6748564177059	EGR1;EGR2;DHX9;ARID4A;FOS	down
GO_Molecular_Function_2021.71	transmembrane receptor protein phosphatase activity (GO:0019198)	2/16	0.00165203025461274	0.0342796277832143	0	0	38.4362934362934	246.213297830706	PTPRT;PTPRM	down
GO_Molecular_Function_2021.81	transmembrane receptor protein tyrosine phosphatase activity (GO:0005001)	2/16	0.00165203025461274	0.0342796277832143	0	0	38.4362934362934	246.213297830706	PTPRT;PTPRM	down
GO_Molecular_Function_2021.91	RNA polymerase binding (GO:0070063)	2/18	0.00209600301429036	0.0386596111524666	0	0	33.6283783783784	207.410525279273	DHX9;NEDD4	down
GO_Molecular_Function_2021.101	single-stranded DNA helicase activity (GO:0017116)	2/19	0.00233683932224976	0.0387915327493459	0	0	31.6486486486486	191.757768977264	CHTF8;DHX9	down
GO_Molecular_Function_2021.111	protein tyrosine phosphatase activity (GO:0004725)	3/74	0.00281646567845559	0.042503027511239	0	0	11.4912213004052	67.4795826681779	PTPRT;DUSP1;PTPRM	down
GO_Molecular_Function_2021.121	protein tyrosine/serine/threonine phosphatase activity (GO:0008138)	2/22	0.00313359739175612	0.0433480972526264	0	0	26.8972972972973	155.078347422762	DUSP1;DUSP6	down
GO_Molecular_Function_2021.131	ATP binding (GO:0005524)	5/278	0.00414102730759095	0.0528777333123152	0	0	5.06913274518908	27.8133752330181	DHX9;HSPA4;HSPA4L;SIK1;CDC42BPA	down
GO_Molecular_Function_2021.141	mitogen-activated protein kinase binding (GO:0051019)	2/29	0.00541373475178282	0.0641838663118646	0	0	19.9169169169169	103.942726310093	DUSP1;DUSP6	down
GO_Molecular_Function_2021.151	RNA polymerase II-specific DNA-binding transcription factor binding (GO:0061629)	4/190	0.0059462416863608	0.0641838663118646	0	0	5.89545997610514	30.2142082553813	PTPRT;EGR2;DHX9;FOS	down
GO_Molecular_Function_2021.161	adenyl ribonucleotide binding (GO:0032559)	5/306	0.0061863967529508	0.0641838663118646	0	0	4.59103457957045	23.3472585886843	DHX9;HSPA4;HSPA4L;SIK1;CDC42BPA	down
GO_Molecular_Function_2021.171	DNA-binding transcription factor binding (GO:0140297)	4/208	0.00813805809730387	0.0794657437736731	0	0	5.37037037037037	25.8379457448113	EGR2;DHX9;SIK1;FOS	down
GO_Molecular_Function_2021.181	sodium channel regulator activity (GO:0017080)	2/37	0.00870836377449712	0.0800266107160441	0	0	15.3583011583012	72.8516617093084	NEDD4;NOS1	down
GO_Molecular_Function_2021.191	phosphatase binding (GO:0019902)	3/114	0.00937647880066977	0.0800266107160441	0	0	7.33543132173269	34.253170523186	PTPRT;TRAF3;JAK1	down
GO_Molecular_Function_2021.201	signaling receptor complex adaptor activity (GO:0030159)	2/39	0.00964176032723423	0.0800266107160441	0	0	14.5266617969321	67.4277026886925	GRIP1;SHANK1	down
GO_Molecular_Function_2021.211	DNA binding (GO:0003677)	8/811	0.0117248416552911	0.0926820816561107	0	0	2.80140649036701	12.4551806350609	EGR1;NR4A1;EGR2;DHX9;ZBTB16;ARID4A;CHD2;JUNB	down
Table S3. Functional enrichment for SST+ neurons. Significantly enriched (FDR ≤ 0.01) GO terms and pathways from overrepresentation analysis for differentially expressed genes in SST+ neurons in Creutzfeldt-Jakob disease and fatal familial insomnia.

## Sheet: FFI_SST
	Term	Overlap	P.value	Adjusted.P.value	Old.P.value	Old.Adjusted.P.value	Odds.Ratio	Combined.Score	Genes	Direction
GO_Biological_Process_2021.1	SRP-dependent cotranslational protein targeting to membrane (GO:0006614)	58/90	7.14799046485076e-86	1.40386532729669e-82	0	0	154.407738095238	30272.4842477814	RPL4;SRP19;RPL30;RPL32;RPL31;RPL34;RPLP1;RPL10A;RPL9;RPL7;RPS15;RPS4X;RPL7A;RPS14;RPS17;RPS16;RPL18A;RPS19;RPS18;RPL35;RPLP2;RPL37;RPS11;RPL39;RPS10;RPS12;RPS9;RPL21;RPS7;RPS8;RPS5;RPS6;RPL37A;RPL26;UBA52;RPL10;RPL12;RPL36A;RPS15A;RPL14;RPL13;RPS2;RPS27A;RPL17;RPL19;RPL41;RPL35A;RPL23A;RPS26;RPS25;RPS28;RPS27;RPS29;RPL27A;RPS20;RPS21;RPS24;RPS23	up
GO_Biological_Process_2021.2	cotranslational protein targeting to membrane (GO:0006613)	58/94	3.53710467784707e-84	3.47343679364582e-81	0	0	137.223424723425	26368.0079034091	RPL4;SRP19;RPL30;RPL32;RPL31;RPL34;RPLP1;RPL10A;RPL9;RPL7;RPS15;RPS4X;RPL7A;RPS14;RPS17;RPS16;RPL18A;RPS19;RPS18;RPL35;RPLP2;RPL37;RPS11;RPL39;RPS10;RPS12;RPS9;RPL21;RPS7;RPS8;RPS5;RPS6;RPL37A;RPL26;UBA52;RPL10;RPL12;RPL36A;RPS15A;RPL14;RPL13;RPS2;RPS27A;RPL17;RPL19;RPL41;RPL35A;RPL23A;RPS26;RPS25;RPS28;RPS27;RPS29;RPL27A;RPS20;RPS21;RPS24;RPS23	up
GO_Biological_Process_2021.3	protein targeting to ER (GO:0045047)	58/103	9.04736005662688e-81	5.92300505040506e-78	0	0	109.728523328523	20223.7261185767	RPL4;SRP19;RPL30;RPL32;RPL31;RPL34;RPLP1;RPL10A;RPL9;RPL7;RPS15;RPS4X;RPS14;RPL7A;RPS17;RPS16;RPL18A;RPS19;RPS18;RPL35;RPLP2;RPL37;RPS11;RPL39;RPS10;RPS12;RPS9;RPL21;RPS7;RPS8;RPS5;RPS6;RPL37A;RPL26;UBA52;RPL10;RPL12;RPL36A;RPS15A;RPL14;RPL13;RPS2;RPS27A;RPL17;RPL19;RPL41;RPL35A;RPL23A;RPS26;RPS25;RPS28;RPS27;RPS29;RPL27A;RPS20;RPS21;RPS24;RPS23	up
GO_Biological_Process_2021.4	cytoplasmic translation (GO:0002181)	56/93	2.44125994888496e-80	1.19865863490251e-77	0	0	127.797703282682	23427.1456448639	RPL4;RPL30;RPL32;RPL31;RPL34;RPLP1;RPL10A;RPL9;RPL7;RPS15;RPS4X;RPL7A;RPS14;RPS17;RPS16;RPL18A;RPS19;RPS18;RPL35;RPL37;RPS11;RPL39;RPS10;RPS12;RPS9;RPL21;RPS7;RPS8;RPS5;RPS6;RPL37A;RPL26;UBA52;RPL10;RPL12;RPL36A;RPS15A;RPL14;RPL13;RPS2;RPS27A;RPL17;RPL19;RPL41;RPL35A;RPL23A;RPS26;RPS25;RPS28;RPS27;RPS29;RPL27A;RPS20;RPS21;RPS24;RPS23	up
GO_Biological_Process_2021.5	nuclear-transcribed mRNA catabolic process, nonsense-mediated decay (GO:0000184)	57/113	1.50627261322647e-75	5.91663882475356e-73	0	0	86.2326816502463	14856.5323527081	RPL4;RPL30;RPL32;RPL31;RPL34;RPLP1;RPL10A;RPL9;RPL7;RPS15;RPS4X;RPS14;RPL7A;RPS17;RPS16;RPL18A;RPS19;RPS18;RPL35;RPLP2;RPL37;RPS11;RPL39;RPS10;RPS12;RPS9;RPL21;RPS7;RPS8;RPS5;RPS6;RPL37A;RPL26;UBA52;RPL10;RPL12;RPL36A;RPS15A;RPL14;RPL13;RPS2;RPS27A;RPL17;RPL19;RPL41;RPL35A;RPL23A;RPS26;RPS25;RPS28;RPS27;RPS29;RPL27A;RPS20;RPS21;RPS24;RPS23	up
GO_Biological_Process_2021.6	peptide biosynthetic process (GO:0043043)	57/162	3.11291617116932e-64	1.01896122669609e-61	0	0	45.8761083743842	6708.45809721227	RPL4;RPL30;RPL32;RPL31;RPL34;RPLP1;RPL10A;RPL9;RPL7;RPS15;RPS4X;RPS14;RPL7A;RPS17;RPS16;RPL18A;RPS19;RPS18;RPL35;RPLP2;RPL37;RPS11;RPL39;RPS10;RPS12;RPS9;RPL21;RPS7;RPS8;RPS5;RPS6;EEF1A1;RPL37A;RPL26;RPL10;RPL12;RPL36A;RPS15A;RPL14;RPL13;RPS2;RPS27A;RPL17;RPL19;RPL41;RPL35A;RPL23A;RPS26;RPS25;RPS28;RPS27;RPS29;RPL27A;RPS20;RPS21;RPS24;RPS23	up
GO_Biological_Process_2021.7	nuclear-transcribed mRNA catabolic process (GO:0000956)	57/171	1.20431452052468e-62	3.37896245472925e-60	0	0	42.2349137931034	6021.61602430775	RPL4;RPL30;RPL32;RPL31;RPL34;RPLP1;RPL10A;RPL9;RPL7;RPS15;RPS4X;RPS14;RPL7A;RPS17;RPS16;RPL18A;RPS19;RPS18;RPL35;RPLP2;RPL37;RPS11;RPL39;RPS10;RPS12;RPS9;RPL21;RPS7;RPS8;RPS5;RPS6;RPL37A;RPL26;UBA52;RPL10;RPL12;RPL36A;RPS15A;RPL14;RPL13;RPS2;RPS27A;RPL17;RPL19;RPL41;RPL35A;RPL23A;RPS26;RPS25;RPS28;RPS27;RPS29;RPL27A;RPS20;RPS21;RPS24;RPS23	up
GO_Biological_Process_2021.8	translation (GO:0006412)	59/214	2.76706446121494e-59	6.79314325228269e-57	0	0	32.3647685834502	4363.89494640493	RPL4;RPL30;RPL32;RPL31;RPL34;RPLP1;RPL10A;RPL9;RPL7;RPS15;EEF1B2;RPS4X;RPS14;RPL7A;RPS17;RPS16;RPL18A;RPS19;RPS18;RPL35;RPLP2;RPL37;RPS11;RPL39;RPS10;RPS12;RPS9;RPL21;RPS7;RPS8;RPS5;RPS6;EEF1A1;RPL37A;RPL26;UBA52;RPL10;RPL12;RPL36A;RPS15A;RPL14;RPL13;RPS2;RPS27A;RPL17;RPL19;RPL41;RPL35A;RPL23A;RPS26;RPS25;RPS28;RPS27;RPS29;RPL27A;RPS20;RPS21;RPS24;RPS23	up
GO_Biological_Process_2021.9	cellular macromolecule biosynthetic process (GO:0034645)	62/314	1.40648813705665e-52	3.06926966797695e-50	0	0	21.0904482204042	2518.05882147319	RPL4;RPL30;RPL32;RPL31;RPL34;RPLP1;RPL10A;RPL9;RPL7;PTMS;RPS15;EEF1B2;RPS4X;RPS14;RPL7A;RPS17;RPS16;RPL18A;RPS19;RPS18;RPL35;RPLP2;RPL37;RPS11;RPL39;RPS10;RPS12;RPS9;RPL21;RPS7;RPS8;RPS5;RPS6;EEF1A1;RPL37A;RPL26;RPL10;RPL12;RPL36A;RPS15A;RPL14;RPL13;APOE;RPS2;POLR2H;RPS27A;RPL17;RPL19;RPL41;RPL35A;RPL23A;RPS26;RPS25;RPS28;RPS27;RPS29;RPL27A;POLE3;RPS20;RPS21;RPS24;RPS23	up
GO_Biological_Process_2021.10	gene expression (GO:0010467)	61/356	8.44903919473377e-48	1.65939129784571e-45	0	0	17.6089206066012	1908.63146334352	RPL4;RPL30;RPL32;RPL31;RPL34;RPLP1;RPL10A;RPL9;RPL7;RPS15;RPS4X;RPS14;RPL7A;RPS17;RPS16;RPL18A;RPS19;RPS18;RPL35;RPLP2;RPL37;RPS11;RPL39;RPS10;RPS12;RPS9;RPL21;RPS7;RPS8;RPS5;RPS6;EEF1A1;SARNP;RPL37A;SRSF2;RPL26;RPL10;RPL12;RPL36A;RPS15A;RPL14;RPL13;RPS2;POLR2H;RPS27A;RPL17;RPL19;RPL41;RPL35A;RPL23A;RPS26;RPS25;TSPAN15;RPS28;RPS27;RPS29;RPL27A;RPS20;RPS21;RPS24;RPS23	up
GO_Biological_Process_2021.11	rRNA metabolic process (GO:0016072)	44/162	8.47099080212155e-44	1.51245690321516e-41	0	0	29.8198547215496	2957.44661267783	RPL4;RPL30;RPL32;RPL10;RPL31;RPL34;RPLP1;RPL12;RPL36A;SNU13;RPL10A;RPL9;RPL7;RPS15;RPS14;RPL7A;RPS17;RPS16;RPL18A;RPS19;RPL14;RPL35;RPLP2;RPL13;RPL37;RPS2;RPL39;RPL17;RPL19;RPS9;RPL41;RPL21;RPS7;RPS6;RPL35A;RPL23A;RPS25;RPS28;RPS27;RPL27A;RPL37A;RPL26;UBA52;RPS24	up
GO_Biological_Process_2021.12	cellular protein metabolic process (GO:0044267)	61/417	1.5075303384362e-43	2.46732465390724e-41	0	0	14.5458185491819	1434.2276906439	RPL4;RPL30;RPL32;RPL31;RPL34;RPLP1;RPL10A;RPL9;RPL7;UBE2L3;RPS15;RPS4X;RPS14;RPL7A;RPS17;RPS16;RPL18A;RPS19;RPS18;RPL35;RPLP2;RPL37;RPS11;RPL39;RPS10;RPS12;RPS9;RPL21;RPS7;RPS8;RPS5;RPS6;EEF1A1;RPL37A;RPL26;UBA52;RPL10;RPL12;RPL36A;RPS15A;RPL14;RPL13;APOE;RPS2;RPS27A;RPL17;RPL19;RPL41;IGF2;RPL35A;RPL23A;RPS26;RPS25;RPS28;RPS27;RPS29;RPL27A;RPS20;RPS21;RPS24;RPS23	up
GO_Biological_Process_2021.13	rRNA processing (GO:0006364)	44/173	2.09668961221844e-42	3.16761415261309e-40	0	0	27.2617623793704	2616.26265094608	RPL4;RPL30;RPL32;RPL10;RPL31;RPL34;RPLP1;RPL12;RPL36A;SNU13;RPL10A;RPL9;RPL7;RPS15;RPS14;RPL7A;RPS17;RPS16;RPL18A;RPS19;RPL14;RPL35;RPLP2;RPL13;RPL37;RPS2;RPL39;RPL17;RPL19;RPS9;RPL41;RPL21;RPS7;RPS6;RPL35A;RPL23A;RPS25;RPS28;RPS27;RPL27A;RPL37A;RPL26;UBA52;RPS24	up
GO_Biological_Process_2021.14	ribosome biogenesis (GO:0042254)	44/192	3.11519421673285e-40	4.37017245833094e-38	0	0	23.7388858246001	2159.45789079829	RPL4;RPL30;RPL32;RPL10;RPL31;RPL34;RPLP1;RPL12;RPL36A;SNU13;RPL10A;RPL9;RPL7;RPS15;RPS14;RPL7A;RPS17;RPS16;RPL18A;RPS19;RPL14;RPL35;RPLP2;RPL13;RPL37;RPS2;RPL39;RPL17;RPL19;RPS9;RPL41;RPL21;RPS7;RPS6;RPL35A;RPL23A;RPS25;RPS28;RPS27;RPL27A;RPL37A;RPL26;UBA52;RPS24	up
GO_Biological_Process_2021.15	ncRNA processing (GO:0034470)	44/201	2.7179738766123e-39	3.55873379577771e-37	0	0	22.3677629013389	1986.27819065681	RPL4;RPL30;RPL32;RPL10;RPL31;RPL34;RPLP1;RPL12;RPL36A;SNU13;RPL10A;RPL9;RPL7;RPS15;RPS14;RPL7A;RPS17;RPS16;RPL18A;RPS19;RPL14;RPL35;RPLP2;RPL13;RPL37;RPS2;RPL39;RPL17;RPL19;RPL41;RPS9;RPL21;RPS7;RPS6;RPL35A;RPL23A;RPS25;RPS28;RPS27;RPL27A;RPL37A;RPL26;UBA52;RPS24	up
GO_Biological_Process_2021.16	ribosomal small subunit biogenesis (GO:0042274)	13/40	7.76081866075462e-15	9.52640490607629e-13	0	0	34.3387010198604	1115.65370199103	RPS7;RPS5;RPS6;SNU13;RPS15;RPS14;RPS25;RPS17;RPS28;RPS16;RPS27;RPS19;RPS24	up
GO_Biological_Process_2021.17	ribonucleoprotein complex biogenesis (GO:0022613)	13/60	2.57524157707206e-12	2.97516144551148e-10	0	0	19.7064446500154	525.868008053392	RPS7;RPS6;RPL35A;RPL7;RPS15;RPS25;RPS17;RPS28;RPS16;RPS19;RPL14;RPL26;RPS24	up
GO_Biological_Process_2021.18	ribosomal small subunit assembly (GO:0000028)	6/17	9.35669270005646e-08	1.02091913682838e-05	0	0	37.9698040475426	614.525667600999	RPS15;RPS14;RPS28;RPS27;RPS19;RPS5	up
GO_Biological_Process_2021.19	ribosomal large subunit biogenesis (GO:0042273)	9/57	1.1886988963225e-07	1.22873928019862e-05	0	0	13.1671875	209.953916178554	RPL7A;RPL10;RPL14;RPL35A;SNU13;RPL23A;RPL26;RPL10A;RPL7	up
GO_Biological_Process_2021.20	ribosome assembly (GO:0042255)	8/50	5.47225296718157e-07	5.3737524137723e-05	0	0	13.3326554821217	192.235629697523	RPS15;RPS14;RPS28;RPS27;RPS19;RPL10;RPS5;RPL23A	up
GO_Biological_Process_2021.21	maturation of SSU-rRNA (GO:0030490)	6/35	9.86092801256053e-06	0.000922231553174708	0	0	14.3891799683197	165.8630742072	RPS14;RPS28;RPS16;RPS19;RPS8;SNU13	up
GO_Biological_Process_2021.22	negative regulation of platelet-derived growth factor receptor signaling pathway (GO:0010642)	4/11	1.30082659163453e-05	0.00111856188441817	0	0	39.5067669172932	444.448187048188	SLC9A3R1;LRP1;APOD;SNCA	up
GO_Biological_Process_2021.23	positive regulation of signal transduction by p53 class mediator (GO:1901798)	5/22	1.309924813728e-05	0.00111856188441817	0	0	20.3956089478045	229.306928354089	RPS15;RPS7;RPS20;MSX1;RPL37	up
GO_Biological_Process_2021.24	positive regulation of intrinsic apoptotic signaling pathway by p53 class mediator (GO:1902255)	3/5	2.92253999501051e-05	0.00239161189591694	0	0	103.368881118881	1079.21994677383	RPS7;MSX1;RPL26	up
GO_Biological_Process_2021.25	maturation of LSU-rRNA (GO:0000470)	5/26	3.12076545565e-05	0.00245167334195864	0	0	16.5073775989269	171.261519516922	RPL7A;RPL35;SNU13;RPL10A;RPL7	up
GO_Biological_Process_2021.26	myelination (GO:0042552)	6/48	6.36926747586944e-05	0.00469074074045651	0	0	9.92882382635033	95.9267455772003	PLLP;PMP22;MAL;MBP;SOX10;HES5	up
GO_Biological_Process_2021.27	maturation of SSU-rRNA from tricistronic rRNA transcript (SSU-rRNA, 5.8S rRNA, LSU-rRNA) (GO:0000462)	5/30	6.44857433769479e-05	0.00469074074045651	0	0	13.8633802816901	133.768676748771	RPS14;RPS16;RPS19;RPS8;RPS21	up
GO_Biological_Process_2021.28	amyloid fibril formation (GO:1990000)	6/63	0.000294262291481896	0.020306961730407	0	0	7.31039613167194	59.4411163478186	FKBP1A;TSPAN15;GSN;RPS27A;UBA52;SNCA	up
GO_Biological_Process_2021.29	regulated exocytosis (GO:0045055)	10/180	0.000299848212923525	0.020306961730407	0	0	4.11996626607632	33.4221311157802	CD63;SNAPIN;ACTN2;TMSB4X;IGF2;VEGFB;CD9;ACTN4;VTI1B;SNCA	up
GO_Biological_Process_2021.30	platelet degranulation (GO:0002576)	8/125	0.000471498344116456	0.0308674249281573	0	0	4.7678316148067	36.519659044306	CD63;ACTN2;TMSB4X;IGF2;VEGFB;CD9;ACTN4;VTI1B	up
GO_Biological_Process_2021.31	glial cell differentiation (GO:0010001)	4/29	0.000762752381764611	0.0456497926632415	0	0	11.0517894736842	79.3361229598951	METRN;SOX8;SOX10;HES5	up
GO_Biological_Process_2021.32	regulation of platelet-derived growth factor receptor signaling pathway (GO:0010640)	3/13	0.000767028084463834	0.0456497926632415	0	0	20.6653846153846	148.232538115718	SLC9A3R1;APOD;SNCA	up
GO_Biological_Process_2021.33	positive regulation of lipid transport (GO:0032370)	3/13	0.000767028084463834	0.0456497926632415	0	0	20.6653846153846	148.232538115718	LRP1;DBI;APOE	up
GO_Biological_Process_2021.34	ribonucleoprotein complex assembly (GO:0022618)	8/136	0.000823461524302647	0.0475670127567764	0	0	4.35564946619217	30.9337952059279	RPS15;RPS14;RPS28;RPS27;RPS19;RPL10;RPS5;RPL23A	up
GO_Biological_Process_2021.35	positive regulation of protein ubiquitination (GO:0031398)	6/82	0.00120695270347751	0.0666651352242184	0	0	5.47749674539706	36.806896733949	ARRDC4;FKBP1A;FAM107A;LAPTM5;RPS2;UBE2L3	up
GO_Biological_Process_2021.36	actin filament bundle assembly (GO:0051017)	4/33	0.00125591140697356	0.0666651352242184	0	0	9.52546884452511	63.6291197934377	LIMA1;MICAL1;FAM107A;LCP1	up
GO_Biological_Process_2021.37	actin filament bundle organization (GO:0061572)	4/33	0.00125591140697356	0.0666651352242184	0	0	9.52546884452511	63.6291197934377	LIMA1;MICAL1;FAM107A;LCP1	up
GO_Biological_Process_2021.38	Notch signaling pathway (GO:0007219)	5/60	0.00173692568465662	0.0897716327543581	0	0	6.29193341869398	39.9892547558089	HEYL;HEY1;MDK;NRARP;HES5	up
GO_Biological_Process_2021.39	central nervous system development (GO:0007417)	11/268	0.00187609233663114	0.0923434477224441	0	0	2.99518517481734	18.8054624399026	SH3GL3;GSN;MAL;SOX8;APOD;PHGDH;MBP;IER3IP1;S100B;SOX10;HES5	up
GO_Biological_Process_2021.40	regulation of cell differentiation (GO:0045595)	8/156	0.00198206887914826	0.0923434477224441	0	0	3.76320092334327	23.4207102950364	HEY1;MDK;ID2;PLEKHB1;IGF2;VHL;HES5;ATF4	up
GO_Biological_Process_2021.41	epithelium development (GO:0060429)	7/122	0.00199346195605395	0.0923434477224441	0	0	4.22978723404255	26.3003199168896	GSTK1;SLC9A3R1;SALL1;SOX8;SOX10;HES5;CNN3	up
GO_Biological_Process_2021.42	regulation of guanyl-nucleotide exchange factor activity (GO:1905097)	2/5	0.00202177609575616	0.0923434477224441	0	0	45.7793263646922	284.004818891694	GPSM1;PBXIP1	up
GO_Biological_Process_2021.43	regulation of sodium:proton antiporter activity (GO:0032415)	2/5	0.00202177609575616	0.0923434477224441	0	0	45.7793263646922	284.004818891694	SLC9A3R1;ACTN4	up
GO_Biological_Process_2021.44	nervous system development (GO:0007399)	15/447	0.00227627529691932	0.0985738902778654	0	0	2.44310117599351	14.866795467195	SH3GL3;GSN;LPAR1;S100B;SOX10;GJB1;MOBP;MDK;FABP7;PMP22;MAL;SOX8;MBP;EVL;HES5	up
GO_Biological_Process_2021.45	antimicrobial humoral immune response mediated by antimicrobial peptide (GO:0061844)	5/64	0.00231408327413524	0.0985738902778654	0	0	5.86416805920267	35.588121024199	RPL30;RPS19;HMGN2;CXCL14;RPL39	up
GO_Biological_Process_2021.46	diterpenoid metabolic process (GO:0016101)	5/64	0.00231408327413524	0.0985738902778654	0	0	5.86416805920267	35.588121024199	LRP1;SDC4;GPC5;APOE;RLBP1	up
GO_Biological_Process_2021.47	regulation of exit from mitosis (GO:0007096)	4/39	0.00235894747609963	0.0985738902778654	0	0	7.89012531328321	47.7316266688644	RGCC;ANAPC16;RPS27A;UBA52	up
GO_Biological_Process_2021.48	regulation of oligodendrocyte differentiation (GO:0048713)	3/19	0.00243733431755988	0.0997275958268251	0	0	12.9119318181818	77.6891612171055	OPALIN;MDK;HES5	up
GO_Cellular_Component_2021.1	cytosolic small ribosomal subunit (GO:0022627)	28/40	3.77179358582377e-43	7.69445891508048e-41	0	0	176.108556832695	17202.9192941746	RPS15;RPS4X;RPS14;RPS17;RPS15A;RPS16;RPS19;RPS18;RPS2;RPS11;RPS27A;RPS10;RPS12;RPS9;RPS7;RPS8;RPS5;RPS6;RPS26;RPS25;RPS28;RPS27;RPS29;RPS20;RPS21;UBA52;RPS24;RPS23	up
GO_Cellular_Component_2021.2	small ribosomal subunit (GO:0015935)	28/45	6.99201453860131e-41	7.13185482937334e-39	0	0	124.280369619112	11491.1146088513	RPS15;RPS4X;RPS14;RPS17;RPS15A;RPS16;RPS19;RPS18;RPS2;RPS11;RPS27A;RPS10;RPS12;RPS9;RPS7;RPS8;RPS5;RPS6;RPS26;RPS25;RPS28;RPS27;RPS29;RPS20;RPS21;UBA52;RPS24;RPS23	up
GO_Cellular_Component_2021.3	cytosolic large ribosomal subunit (GO:0022625)	29/55	2.63380409778662e-39	1.7909867864949e-37	0	0	84.4474852071006	7501.67188982104	RPL4;RPL30;RPL32;RPL10;RPL31;RPL34;RPLP1;RPL12;RPL36A;RPL10A;RPL9;RPL7;RPL7A;RPL18A;RPL14;RPL35;RPLP2;RPL13;RPL37;RPL39;RPL17;RPL19;RPL41;RPL21;RPL35A;RPL23A;RPL27A;RPL37A;RPL26	up
GO_Cellular_Component_2021.4	large ribosomal subunit (GO:0015934)	29/59	4.1587545668915e-38	2.12096482911467e-36	0	0	73.1729487179487	6298.21652386527	RPL4;RPL30;RPL32;RPL10;RPL31;RPL34;RPLP1;RPL12;RPL36A;RPL10A;RPL9;RPL7;RPL7A;RPL18A;RPL14;RPL35;RPLP2;RPL13;RPL37;RPL39;RPL17;RPL19;RPL41;RPL21;RPL35A;RPL23A;RPL27A;RPL37A;RPL26	up
GO_Cellular_Component_2021.5	ribosome (GO:0005840)	27/62	1.07539753229841e-33	4.38762193177752e-32	0	0	57.9336968375136	4397.89857870485	RPL30;RPL32;RPL31;RPL36A;RPL10A;RPL9;RPS4X;RPL7A;RPS17;RPL18A;RPS19;RPS18;RPS11;RPL39;RPS10;RPL19;RPS9;RPL41;RPS7;RPS5;RPS26;RPS25;RPS28;RPS27;RPS29;RPS21;RPS23	up
GO_Cellular_Component_2021.6	focal adhesion (GO:0005925)	40/387	1.03042105523772e-22	3.50343158780823e-21	0	0	8.96450354733053	453.845065300351	RPL4;RPL30;LRP1;RPL31;RPLP1;RPL12;FAM107A;RPL10A;RPL9;RPL7;CNN3;RPS15;RPS4X;RPS14;LIMA1;RPL7A;RPS17;RPS16;MPRIP;RPS19;CSRP1;RPS18;RPLP2;RPS2;RPS11;RPS10;RPL19;RPS9;GSN;RPS7;ACTN2;RPS8;RPS5;RHOG;ACTN4;RPS29;RPL37A;CD9;EVL;LCP1	up
GO_Cellular_Component_2021.7	cell-substrate junction (GO:0030055)	40/394	2.01075477212816e-22	5.85991390734492e-21	0	0	8.78406280489188	438.837388434052	RPL4;RPL30;LRP1;RPL31;RPLP1;RPL12;FAM107A;RPL10A;RPL9;RPL7;CNN3;RPS15;RPS4X;RPS14;LIMA1;RPL7A;RPS17;RPS16;MPRIP;RPS19;CSRP1;RPS18;RPLP2;RPS2;RPS11;RPS10;RPL19;RPS9;GSN;RPS7;ACTN2;RPS8;RPS5;RHOG;ACTN4;RPS29;RPL37A;CD9;EVL;LCP1	up
GO_Cellular_Component_2021.8	polysomal ribosome (GO:0042788)	15/30	2.2169983954646e-20	5.65334590843472e-19	0	0	71.8832116788321	3253.11411158126	RPL30;RPL41;RPL32;RPL31;RPL36A;RPL10A;RPS26;RPL7A;RPS28;RPL18A;RPS29;RPL39;RPS21;RPL19;RPS23	up
GO_Cellular_Component_2021.9	intracellular non-membrane-bounded organelle (GO:0043232)	43/1158	1.18468133598843e-08	2.68527769490711e-07	0	0	2.91526486565314	53.2071022905365	RPL4;SRP19;ABHD4;RPL36A;SNU13;ABHD5;RPL9;RPL7;RPS4X;RPS14;RPL7A;RPS17;SALL1;RPS19;RPS18;S100A16;MXI1;RPL35;RPL13;RPS2;RPS11;RPS27A;RPS10;RPL19;RPS9;GSN;RPS7;ACTN2;RPS5;RPS6;RHOG;RPL23A;ETV4;EEF1A1;RPS25;COX7A2L;RPS27;RGCC;RPL26;LCP1;LETMD1;DBN1;RPS23	up
GO_Cellular_Component_2021.10	asymmetric synapse (GO:0032279)	12/133	5.34661571642466e-07	1.09070960615063e-05	0	0	7.01375421427932	101.290056365299	RPS14;RPS25;RPL30;RPS27;RPS19;FABP5;RPS18;RPL12;RPL14;PDLIM5;DBN1;RPL7	up
GO_Cellular_Component_2021.11	postsynaptic density (GO:0014069)	12/138	7.95925068928542e-07	1.4760792187402e-05	0	0	6.73371153515558	94.5666340288906	RPS14;RPS25;RPL30;RPS27;RPS19;FABP5;RPS18;RPL12;RPL14;PDLIM5;DBN1;RPL7	up
GO_Cellular_Component_2021.12	nucleolus (GO:0005730)	28/733	3.02853959767933e-06	5.14851731605487e-05	0	0	2.89213880057607	36.7516514615561	RPL4;SRP19;SNU13;RPL7;RPS14;RPL7A;RPS19;S100A16;MXI1;RPL35;RPL13;RPS2;POLR2H;RPS11;RPS27A;RPS10;RPL19;RPS9;RPS7;RPS6;RPL23A;ETV4;EEF1A1;RPS25;COX7A2L;RGCC;RPL26;LETMD1	up
GO_Cellular_Component_2021.13	nuclear lumen (GO:0031981)	27/745	1.18848472907941e-05	0.000186500680563231	0	0	2.72603606285483	30.9139203921861	RPL4;SRP19;SNU13;RPL7;RPS14;RPL7A;RPS19;S100A16;MXI1;RPL35;RPL13;RPS2;RPS11;RPS27A;RPS10;RPL19;RPS9;RPS7;RPS6;RPL23A;ETV4;EEF1A1;RPS25;COX7A2L;RGCC;RPL26;LETMD1	up
GO_Cellular_Component_2021.14	actin cytoskeleton (GO:0015629)	16/316	1.58093707923929e-05	0.000230365117260582	0	0	3.79213675213675	41.9217218019328	GSN;ACTN2;FAM107A;ACTN4;CNN3;EEF1A1;LIMA1;SLC9A3R1;MPRIP;MOBP;MICAL1;MYO6;LCP1;PDLIM5;DBN1;SNCA	up
GO_Cellular_Component_2021.15	platelet alpha granule (GO:0031091)	8/90	4.79711574034275e-05	0.000652407740686613	0	0	6.81503341723809	67.7748981732854	ACTN2;TMSB4X;IGF2;VEGFB;CD9;ACTN4;SNCA;VTI1B	up
GO_Cellular_Component_2021.16	rough endoplasmic reticulum membrane (GO:0030867)	3/6	5.78250496988761e-05	0.00073726938366067	0	0	68.9090909090909	672.421006882324	RPS26;RPS28;RPS29	up
GO_Cellular_Component_2021.17	lysosomal membrane (GO:0005765)	14/330	0.000339710784824589	0.00407652941789507	0	0	3.12462600690449	24.9576875591404	SLC36A1;CD63;ATP6V1G1;LRP1;BRI3;LAPTM5;LITAF;GPR137B;EEF1A1;PIP4P1;MYO6;TMBIM1;UBA52;VTI1B	up
GO_Cellular_Component_2021.18	platelet alpha granule lumen (GO:0031093)	6/67	0.000411879977824369	0.00466797308200952	0	0	6.82963563691131	53.2354974831233	ACTN2;TMSB4X;IGF2;VEGFB;ACTN4;VTI1B	up
GO_Cellular_Component_2021.19	lytic vacuole membrane (GO:0098852)	12/267	0.000537536589134791	0.00577144548334197	0	0	3.30533021873009	24.8842239255322	SLC36A1;CD63;ATP6V1G1;PIP4P1;LRP1;MYO6;TMBIM1;LAPTM5;UBA52;LITAF;GPR137B;VTI1B	up
GO_Cellular_Component_2021.20	cytoplasmic side of endoplasmic reticulum membrane (GO:0098554)	3/13	0.000767028084463834	0.00782368646153111	0	0	20.6653846153846	148.232538115718	RPS26;RPS28;RPS29	up
GO_Cellular_Component_2021.21	lysosome (GO:0005764)	16/477	0.00165094139773389	0.0160377164351292	0	0	2.44729962734301	15.6784038503934	SLC36A1;CD63;ATP6V1G1;SDC4;LRP1;LAPTM5;LITAF;GPR137B;PIP4P1;GM2A;MYO6;TMBIM1;GPC5;UBA52;VTI1B;SNCA	up
GO_Cellular_Component_2021.22	cytoplasmic side of lysosomal membrane (GO:0098574)	2/5	0.00202177609575616	0.018673323259459	0	0	45.7793263646922	284.004818891694	EEF1A1;LITAF	up
GO_Cellular_Component_2021.23	endocytic vesicle membrane (GO:0030666)	8/158	0.00214639857238069	0.018673323259459	0	0	3.7126453143535	22.8103588739055	PIP4P1;LRP1;ANXA3;CD9;APOE;RPS27A;UBA52;VAMP3	up
GO_Cellular_Component_2021.24	secretory granule lumen (GO:0034774)	12/316	0.00226904087841627	0.018673323259459	0	0	2.76558046741402	16.8379547451027	EEF1A1;GSN;FABP5;GM2A;ACTN2;TMSB4X;IGF2;VEGFB;ACTN4;PRDX6;SPTAN1;VTI1B	up
GO_Cellular_Component_2021.25	intracellular membrane-bounded organelle (GO:0043231)	97/5192	0.00228839745826703	0.018673323259459	0	0	1.44928851815505	8.811534343133	RPL4;RPL30;CCNI;AQP9;BCCIP;FAM107A;RPL10A;RPL9;RPL7;UBE2L3;RPS15;EEF1B2;SALL1;RPS18;FTH1;SOX8;BANF1;HMGN2;RPS12;HMGN1;ARRDC4;RPS9;RPS7;S100A1;RPS8;RPS6;ACTN4;SOX10;EEF1A1;SARNP;SRSF2;ERH;ATF5;UBA52;ATF4;MAX;SNU13;ABHD5;SLC9A3R1;S100A16;MYO6;APOE;VTI1B;PRDX6;COPRS;RPS25;RPS27;RGCC;ADI1;ID2;ID3;PKIG;RPS24;DDX3Y;KDM5D;LITAF;PTMS;RPL7A;CSRP1;HEY1;GM2A;TMSB4X;SUMO2;SPTAN1;HSBP1;RHOG;OLIG1;OLIG2;DYNLL1…	up
GO_Cellular_Component_2021.26	cortical actin cytoskeleton (GO:0030864)	4/42	0.00310336534323081	0.024349481923811	0	0	7.26611265004617	41.9637490473708	EEF1A1;GSN;MOBP;DBN1	up
GO_Cellular_Component_2021.27	low-density lipoprotein particle (GO:0034362)	2/7	0.00416522181167642	0.0314705647993329	0	0	27.4648083623693	150.53422322428	SELENOS;APOE	up
GO_Cellular_Component_2021.28	vesicle (GO:0031982)	9/226	0.00575846654515287	0.0419545419718281	0	0	2.88752468729427	14.8912075507485	ARRDC4;SLC9A3R1;MYO6;CD9;APOE;RPS27A;UBA52;SPTAN1;VTI1B	up
GO_Cellular_Component_2021.29	cytoskeleton (GO:0005856)	17/600	0.00663548042385552	0.0447019515701773	0	0	2.05060034305317	10.2844255379724	GSN;ACTN2;USP10;RHOG;FAM107A;ACTN4;CNN3;LIMA1;SLC9A3R1;MPRIP;MICAL1;MYO6;LCP1;PDLIM5;SPTAN1;DBN1;SNCA	up
GO_Cellular_Component_2021.30	clathrin coat of trans-Golgi network vesicle (GO:0030130)	2/9	0.00700529330088746	0.0447019515701773	0	0	19.6157292185167	97.3153829616414	AFTPH;NCALD	up
GO_Cellular_Component_2021.31	pseudopodium (GO:0031143)	2/9	0.00700529330088746	0.0447019515701773	0	0	19.6157292185167	97.3153829616414	ACTN2;ACTN4	up
GO_Cellular_Component_2021.32	nucleus (GO:0005634)	83/4484	0.00701207083453761	0.0447019515701773	0	0	1.40163422699607	6.9522770597204	RPL4;DDX3Y;RPL30;KDM5D;CCNI;BCCIP;FAM107A;RPL10A;RPL9;RPL7;UBE2L3;PTMS;RPS15;EEF1B2;RPL7A;SALL1;CSRP1;HEY1;RPS18;FTH1;TMSB4X;SUMO2;SOX8;BANF1;HMGN2;HMGN1;RPS9;RPS7;HSBP1;S100A1;RPS8;RPS6;OLIG1;ACTN4;OLIG2;DYNLL1;SOX10;ETV4;EEF1A1;SARNP;RPL37A;SRSF2;ERH;ATF5;UBA52;CRYAB;ATF4;RPL10;MAX;USP10;SNU13;PBXIP1;SLC9A3R1;S100A16;MYO6;MXI1;RPL13;APOE;MSX1;RPS2;VHL;POLR2H;RPS27A;RPL17;HES5;SNCA;H2AZ2;GSN;RPL…	up
GO_Cellular_Component_2021.33	extracellular membrane-bounded organelle (GO:0065010)	4/56	0.00870225603361713	0.0537957645714514	0	0	5.30607287449393	25.1729275225038	ARRDC4;CD9;APOE;SPTAN1	up
GO_Cellular_Component_2021.34	cortical cytoskeleton (GO:0030863)	4/58	0.00982999349252102	0.0589799609551261	0	0	5.1090318388564	23.6155647571574	EEF1A1;GSN;MOBP;DBN1	up
GO_Cellular_Component_2021.35	extracellular vesicle (GO:1903561)	4/59	0.0104277461301436	0.0607788631585514	0	0	5.01588516746411	22.8889141895787	ARRDC4;CD9;APOE;SPTAN1	up
GO_Cellular_Component_2021.36	podosome (GO:0002102)	2/13	0.0146112483109461	0.0827970737620279	0	0	12.4802027241052	52.7408826154225	GSN;LCP1	up
GO_Cellular_Component_2021.37	phagocytic vesicle (GO:0045335)	5/100	0.0150501955870423	0.0829794567501793	0	0	3.63528539659007	15.2549818296793	SNX3;PIP4P1;NCF1;ANXA3;VAMP3	up
GO_Cellular_Component_2021.38	late endosome membrane (GO:0031902)	4/68	0.016878564966993	0.0906112435070151	0	0	4.30855263157895	17.5862658398434	CD63;PIP4P1;LITAF;VTI1B	up
GO_Cellular_Component_2021.39	triglyceride-rich plasma lipoprotein particle (GO:0034385)	2/15	0.0192995100931348	0.0984275014749877	0	0	10.5590994371482	41.6838988593366	SELENOS;APOE	up
GO_Cellular_Component_2021.40	very-low-density lipoprotein particle (GO:0034361)	2/15	0.0192995100931348	0.0984275014749877	0	0	10.5590994371482	41.6838988593366	SELENOS;APOE	up
GO_Cellular_Component_2021.41	endocytic vesicle (GO:0030139)	7/189	0.0202622797739228	0.0990659169488019	0	0	2.66352973267867	10.3850871407373	LRP1;MYO6;LPAR1;CD9;APOE;RPS27A;UBA52	up
GO_Cellular_Component_2021.42	actin filament (GO:0005884)	4/72	0.0203959240776945	0.0990659169488019	0	0	4.05428276573787	15.7809721266034	ACTN2;MYO6;LCP1;DBN1	up
GO_Molecular_Function_2021.1	RNA binding (GO:0003723)	71/1406	4.21300603525272e-21	1.16278966572975e-18	0	0	4.48302924097172	210.326295411593	RPL4;DDX3Y;SRP19;RPL30;RPL32;RPL31;RPL34;BCCIP;RPL10A;RPL9;RPL7;UBE2L3;RPS15;RPS4X;RPS14;RPL7A;RPS17;RPS16;RPL18A;RPS19;CSRP1;RPS18;TMSB4X;SUMO2;RPL35;RPL37;RPS11;HMGN2;RPL39;RPS10;RPS12;RPS9;RPL21;RPS7;RPS8;RPS5;RPS6;ACTN4;EEF1A1;SARNP;RPL37A;SRSF2;ERH;RPL26;RPL10;LRP1;USP10;RPL12;RPL36A;SNU13;RPS15A;S100A16;RPL14;RPL13;RPS2;RPS27A;RPL17;RPL19;RPL41;RPL35A;RPL23A;RPS26;RPS25;RPS28;RPS27;RPL27A;R…	up
GO_Molecular_Function_2021.2	ubiquitin ligase inhibitor activity (GO:1990948)	4/8	2.85564434094106e-06	0.000394078919049866	0	0	69.1473684210526	882.750037229232	RPS15;RPS7;RPS20;RPL37	up
GO_Molecular_Function_2021.3	ubiquitin-protein transferase inhibitor activity (GO:0055105)	4/9	5.08168784103334e-06	0.000467515281375067	0	0	55.3150877192982	674.283567889096	RPS15;RPS7;RPS20;RPL37	up
GO_Molecular_Function_2021.4	actin binding (GO:0003779)	12/177	1.07014868595102e-05	0.000738402593306203	0	0	5.13186741056777	58.7348787120681	LIMA1;GSN;MOBP;MICAL1;TMSB4X;MYO6;ACTN4;LCP1;PDLIM5;DBN1;NCALD;SNCA	up
GO_Molecular_Function_2021.5	lysophospholipid acyltransferase activity (GO:0071617)	3/8	0.000158464890257458	0.00874726194221167	0	0	41.3412587412587	361.735083880276	ABHD4;LPCAT3;ABHD5	up
GO_Molecular_Function_2021.6	mRNA 5'-UTR binding (GO:0048027)	4/25	0.000425116360732372	0.0195553525936891	0	0	13.1595655806182	102.159650435266	RPS14;RPL41;RPS7;RPL26	up
GO_Molecular_Function_2021.7	cadherin binding (GO:0045296)	13/322	0.000869850111003737	0.0342969472338616	0	0	2.95748323249379	20.8419452182746	RPL34;RPL23A;PRDX6;CNN3;RPS26;LIMA1;RPL7A;MPRIP;RPL14;RPS2;PDLIM5;SPTAN1;DBN1	up
GO_Molecular_Function_2021.8	1-acylglycerophosphocholine O-acyltransferase activity (GO:0047184)	2/6	0.00300375733118439	0.0903844633702721	0	0	34.3327526132404	199.400896245689	LPCAT3;PRDX6	up
GO_Molecular_Function_2021.9	rRNA binding (GO:0019843)	4/42	0.00310336534323081	0.0903844633702721	0	0	7.26611265004617	41.9637490473708	RPS14;RPS9;RPL12;RPS5	up
GO_Molecular_Function_2021.10	fibroblast growth factor binding (GO:0017134)	3/21	0.00327479939747363	0.0903844633702721	0	0	11.4761072261072	65.6605321672661	RPS19;RPS2;FGFRL1	up
KEGG_2019_Mouse	Ribosome	58/170	1.87075782199958e-64	2.95579735875934e-62	0	0	43.9371521335807	6447.2982639163	RPL4;RPL30;RPL32;RPL31;RPL34;RPLP1;RPL10A;RPL9;RPL7;RPS15;RPS4X;RPS14;RPL7A;RPS17;RPS16;RPS19;RPL18A;RPS18;RPL35;RPLP2;RPL37;RPS11;RPL39;RPS10;RPS12;RPS9;RPL21;RPS7;RPS8;RPS5;RPS6;RPL37A;RPL26;UBA52;RPL10;RPL12;RPL36A;RPS15A;RPL14;RPL13;RPS2;RPS27A;RPL17;RPL19;RPL41;RPL35A;RPL23A;RPS26;RPS25;RPS28;RPS27;RPS29;RPL27A;RPS27RT;RPS20;RPS21;RPS24;RPS23	up
GO_Biological_Process_2021.110	neuron projection morphogenesis (GO:0048812)	13/140	4.25682783013588e-06	0.00611215198158472	0	0	5.21940058539803	64.5482556167075	TRIO;NYAP1;ATL1;LMTK2;ARC;ALS2;MAP1B;MAP1A;FLRT1;EPHB2;NEFH;EPHB3;SHANK1	down
GO_Biological_Process_2021.210	regulation of anatomical structure morphogenesis (GO:0022603)	12/123	5.96889841951633e-06	0.00611215198158472	0	0	5.50250511608214	66.1893488296167	ARHGAP44;ARC;RUFY3;STAT2;NEDD4;NF1;VASH1;SRCIN1;ARHGAP35;TANC2;CLASP1;EPHB3	down
GO_Biological_Process_2021.310	dendritic spine organization (GO:0097061)	6/27	1.19001863871926e-05	0.00812386057365681	0	0	14.3841351450606	163.101082630634	ARC;ITGA3;EPHB2;IGF1R;EPHB3;SHANK1	down
GO_Biological_Process_2021.410	axon development (GO:0061564)	9/79	2.53640282252555e-05	0.0125621524433426	0	0	6.50684678016284	68.8566147460893	GRM7;MAP1B;ATL1;MAP1A;LMTK2;EPHB2;NEFH;ARHGAP35;EPHB3	down
GO_Biological_Process_2021.510	post-transcriptional gene silencing by RNA (GO:0035194)	5/20	3.55639616393897e-05	0.0125621524433426	0	0	16.7435897435897	171.524309445161	TNRC6C;AGO1;AGO2;HELZ;TNRC6B	down
GO_Biological_Process_2021.610	neuron projection development (GO:0031175)	13/171	3.68031809863552e-05	0.0125621524433426	0	0	4.18866392736431	42.7659498961721	TRIO;NYAP1;RASGRF1;PTPRM;FRY;ARC;GRM7;ALS2;NEDD4;EPHB2;NEFH;EPHB3;SHANK1	down
GO_Biological_Process_2021.710	regulation of gene silencing by miRNA (GO:0060964)	8/67	5.08443628342906e-05	0.0148756078692325	0	0	6.84833355231463	67.7077021701116	NUP205;SEH1L;POLR2A;DHX9;POLR2B;AGO1;AGO2;NUP98	down
GO_Biological_Process_2021.88	regulation of gene silencing by RNA (GO:0060966)	7/55	9.96704439674811e-05	0.0191753926373573	0	0	7.35067654639175	67.7264975592882	NUP205;SEH1L;POLR2A;POLR2B;AGO1;AGO2;NUP98	down
GO_Biological_Process_2021.91	regulation of posttranscriptional gene silencing (GO:0060147)	7/55	9.96704439674811e-05	0.0191753926373573	0	0	7.35067654639175	67.7264975592882	NUP205;SEH1L;POLR2A;POLR2B;AGO1;AGO2;NUP98	down
GO_Biological_Process_2021.101	regulation of neuron projection development (GO:0010975)	12/165	0.000111574521627205	0.0191753926373573	0	0	3.98341268622331	36.2523132186005	ARHGAP44;SETX;ARC;TENM3;KIDINS220;RUFY3;DPYSL3;SRCIN1;CAMK2G;ARHGAP35;TANC2;EPHB3	down
GO_Biological_Process_2021.111	regulation of microtubule depolymerization (GO:0031114)	5/25	0.000112355816234515	0.0191753926373573	0	0	12.5544871794872	114.16849507828	APC2;NAV3;MAP1B;MAP1A;CLASP1	down
GO_Biological_Process_2021.121	phosphatidylinositol dephosphorylation (GO:0046856)	5/25	0.000112355816234515	0.0191753926373573	0	0	12.5544871794872	114.16849507828	SYNJ1;MTMR9;SYNJ2;MTMR4;MTMR7	down
GO_Biological_Process_2021.131	nuclear pore organization (GO:0006999)	4/14	0.000128209280398047	0.0201978927888615	0	0	20.0460358056266	179.649498351282	AHCTF1;NUP205;SEH1L;NUP98	down
GO_Biological_Process_2021.141	monoubiquitinated protein deubiquitination (GO:0035520)	3/6	0.000146283605179549	0.0213992016719797	0	0	50.0051020408163	441.543216795361	USP47;USP15;USP7	down
GO_Biological_Process_2021.151	peptidyl-threonine phosphorylation (GO:0018107)	7/60	0.000174313127020943	0.0237995522759261	0	0	6.6555144913441	57.6011970476489	TBK1;ROCK2;CAMK2A;LMTK2;CDC42BPA;TTBK1;CIT	down
GO_Biological_Process_2021.161	dendritic spine morphogenesis (GO:0060997)	4/16	0.000225920429452522	0.0289178149699228	0	0	16.7033248081841	140.229885490278	ARC;EPHB2;EPHB3;SHANK1	down
GO_Biological_Process_2021.171	positive regulation of synaptic plasticity (GO:0031915)	3/7	0.000252244505631987	0.0303880439726064	0	0	37.5019132653061	310.707539631993	ADCY8;CPLX2;EPHB2	down
GO_Biological_Process_2021.181	RNA metabolic process (GO:0016070)	10/133	0.000315037394879382	0.0341840181621652	0	0	4.11403230915426	33.1706987421969	SETX;RBFOX2;FASTKD1;POLR2A;DHX9;POLR2B;AGO1;AGO2;ADARB1;SND1	down
GO_Biological_Process_2021.191	axonogenesis (GO:0007409)	14/240	0.00031713688724665	0.0341840181621652	0	0	3.15083734002276	25.3837034869113	NRP2;SHC3;CNTN6;ATL1;LMTK2;SEMA3F;ARHGAP35;KIF5C;MAP1B;MAP1A;GRB10;EPHB2;NEFH;EPHB3	down
GO_Biological_Process_2021.201	RNA secondary structure unwinding (GO:0010501)	3/8	0.000397681660154203	0.0387834304759908	0	0	30	234.895761647652	DHX9;AGO1;AGO2	down
GO_Biological_Process_2021.211	progesterone receptor signaling pathway (GO:0050847)	3/8	0.000397681660154203	0.0387834304759908	0	0	30	234.895761647652	NEDD4;UBR5;TRERF1	down
GO_Biological_Process_2021.221	neuromuscular process (GO:0050905)	4/19	0.000459091067039497	0.0427372047862223	0	0	13.3606138107417	102.693177755167	AGTPBP1;KCNA1;MYCBP2;SHANK1	down
GO_Biological_Process_2021.231	regulation of exocytosis (GO:0017157)	6/52	0.000540040432433955	0.0479239351110827	0	0	6.55828769419917	49.343681383601	RAB3C;STXBP5;CPLX2;CLASP1;EXPH5;STXBP5L	down
GO_Biological_Process_2021.241	regulation of cellular response to stress (GO:0080135)	9/118	0.000561608614583001	0.0479239351110827	0	0	4.17036649712411	31.2139644992662	NUP205;NUAK1;SEH1L;ROCK2;CAMK2A;VASH1;NUP98;ADCY8;CAMK2G	down
GO_Biological_Process_2021.251	small RNA loading onto RISC (GO:0070922)	3/9	0.000587796084856776	0.0481522552714671	0	0	24.9987244897959	185.968772930033	DHX9;AGO1;AGO2	down
GO_Biological_Process_2021.261	Wnt signaling pathway, calcium modulating pathway (GO:0007223)	5/36	0.00066710500706368	0.0525473482487083	0	0	8.09511993382961	59.1960752579705	TNRC6C;AGO1;CAMK2A;AGO2;TNRC6B	down
GO_Biological_Process_2021.271	axon guidance (GO:0007411)	12/203	0.000744059828117107	0.054664184612647	0	0	3.1846677511517	22.9404010047108	NRP2;SHC3;KIF5C;CNTN6;GRB10;PTPRM;SEMA3F;EPHB2;ARHGAP35;PLXNA4;EPHB3;RNF165	down
GO_Biological_Process_2021.281	protein localization to cell junction (GO:1902414)	4/22	0.000826799989639288	0.054664184612647	0	0	11.1321398124467	79.0153466530407	DSP;CGNL1;JAK1;SHANK1	down
GO_Biological_Process_2021.291	cAMP biosynthetic process (GO:0006171)	3/10	0.000827436388179715	0.054664184612647	0	0	21.4263848396501	152.066874087606	ADCY9;ADCY1;ADCY8	down
GO_Biological_Process_2021.301	neuron projection fasciculation (GO:0106030)	3/10	0.000827436388179715	0.054664184612647	0	0	21.4263848396501	152.066874087606	EPHB2;ARHGAP35;EPHB3	down
GO_Biological_Process_2021.311	nuclear pore complex assembly (GO:0051292)	3/10	0.000827436388179715	0.054664184612647	0	0	21.4263848396501	152.066874087606	AHCTF1;NUP205;NUP98	down
GO_Biological_Process_2021.321	phosphatidylinositol biosynthetic process (GO:0006661)	9/126	0.000901346670175785	0.0576861868912502	0	0	3.88361897170187	27.2304628341929	FIG4;SYNJ1;MTMR9;PIK3C3;SYNJ2;MTMR4;SOCS7;EFR3B;MTMR7	down
GO_Biological_Process_2021.331	protein phosphorylation (GO:0006468)	21/496	0.000932568987247257	0.0578757965418903	0	0	2.26135660005629	15.7787681561443	USP15;ROCK2;CAMK2A;LMTK2;CDC42BPA;TTBK1;CIT;IGF1R;NUAK1;TBK1;NEK1;MAP3K21;SIK1;CDK12;ERG;SIK2;EPHB2;FNIP2;JAK1;MAP3K5;EPHB3	down
GO_Biological_Process_2021.341	phospholipid dephosphorylation (GO:0046839)	5/39	0.000970655610886219	0.0584677262086758	0	0	7.37971342383107	51.1970484119122	SYNJ1;MTMR9;SYNJ2;MTMR4;MTMR7	down
GO_Biological_Process_2021.351	regulation of microtubule-based movement (GO:0060632)	3/11	0.00112111316620489	0.0620551287672331	0	0	18.7471301020408	127.357375831228	TTC21B;NEFH;HDAC6	down
GO_Biological_Process_2021.361	miRNA mediated inhibition of translation (GO:0035278)	3/11	0.00112111316620489	0.0620551287672331	0	0	18.7471301020408	127.357375831228	TNRC6C;AGO1;AGO2	down
GO_Biological_Process_2021.371	negative regulation of translation, ncRNA-mediated (GO:0040033)	3/11	0.00112111316620489	0.0620551287672331	0	0	18.7471301020408	127.357375831228	TNRC6C;AGO1;AGO2	down
GO_Biological_Process_2021.381	cellular protein modification process (GO:0006464)	35/1025	0.00120003112594625	0.0633806768524944	0	0	1.82807239057239	12.2945322857025	PTPRT;ROCK2;CAMK2A;PTPRM;KLHL11;DCAF5;MTMR4;FBXO41;TTBK1;MTMR7;CDC14B;UFL1;NUAK1;TBK1;OGFOD1;NEK1;MAP3K21;FNIP2;JAK1;MAP3K5;DSP;DUSP1;ZBTB16;FBXL18;LMTK2;FBXO10;CDC42BPA;KTN1;PTPRB;GAN;PIK3C3;SIK1;CDK12;ERG;SIK2	down
GO_Biological_Process_2021.391	transmembrane receptor protein tyrosine kinase signaling pathway (GO:0007169)	18/404	0.0012069562486559	0.0633806768524944	0	0	2.3772488008686	15.9742884284546	CYFIP2;PTPRT;NRP2;RBFOX2;SHC3;ROCK2;IRS4;LMTK2;CBL;GRIN2B;IGF1R;SETX;POLR2A;POLR2B;FLRT1;GRB10;EPHB2;EPHB3	down
GO_Biological_Process_2021.401	regulation of cardiac muscle cell action potential (GO:0098901)	4/25	0.0013645468440155	0.0698647984135935	0	0	9.54037267080745	62.9371982345839	HCN4;DSP;RYR2;NOS1AP	down
GO_Biological_Process_2021.411	modulation of chemical synaptic transmission (GO:0050804)	8/109	0.00144572888725271	0.0718269157618282	0	0	3.99191547061683	26.1037007744769	SLC4A8;ARC;UNC13A;GRM7;CAMK2A;GRIK3;CACNA1A;CPLX2	down
GO_Biological_Process_2021.421	axonal fasciculation (GO:0007413)	3/12	0.00147301292089687	0.0718269157618282	0	0	16.6632653061224	108.651911109656	EPHB2;ARHGAP35;EPHB3	down
GO_Biological_Process_2021.431	intracellular steroid hormone receptor signaling pathway (GO:0030518)	5/44	0.00168915086412896	0.0788693791723521	0	0	6.43195266272189	41.0585584303447	RBFOX2;NEDD4;UBR5;ARID1A;TRERF1	down
GO_Biological_Process_2021.441	phosphatidylinositol metabolic process (GO:0046488)	8/112	0.00171960068616549	0.0788693791723521	0	0	3.87616775988869	24.6743783665944	FIG4;SYNJ1;PLA2G4E;MTMR9;PIK3C3;SYNJ2;MTMR4;MTMR7	down
GO_Biological_Process_2021.451	metal ion transport (GO:0030001)	7/88	0.00178878117817775	0.0788693791723521	0	0	4.34860633829706	27.5102438557237	MRS2;RYR2;CAMK2A;ATP2A3;ITPR1;CACNA1A;ATP2B2	down
GO_Biological_Process_2021.461	central nervous system neuron axonogenesis (GO:0021955)	3/13	0.001887011513401	0.0788693791723521	0	0	14.9961734693878	94.0674107560945	MYCBP2;EPHB2;ARHGAP35	down
GO_Biological_Process_2021.471	semaphorin-plexin signaling pathway involved in neuron projection guidance (GO:1902285)	3/13	0.001887011513401	0.0788693791723521	0	0	14.9961734693878	94.0674107560945	NRP2;SEMA3F;PLXNA4	down
GO_Biological_Process_2021.481	intraciliary retrograde transport (GO:0035721)	3/13	0.001887011513401	0.0788693791723521	0	0	14.9961734693878	94.0674107560945	DYNC2H1;TTC21B;WDR35	down
GO_Biological_Process_2021.49	positive regulation of nuclear-transcribed mRNA poly(A) tail shortening (GO:0060213)	3/13	0.001887011513401	0.0788693791723521	0	0	14.9961734693878	94.0674107560945	TNRC6C;AGO2;TNRC6B	down
GO_Biological_Process_2021.50	regulation of small GTPase mediated signal transduction (GO:0051056)	9/141	0.00197940578639625	0.0799486468099408	0	0	3.43964908148846	21.4116730867585	ARHGAP44;ARHGAP32;TRIO;RASGRF2;MCF2;FAM13A;RASGRF1;ARHGAP35;CGNL1	down
GO_Biological_Process_2021.51	calcium ion transport (GO:0006816)	8/115	0.00203294186895162	0.0799486468099408	0	0	3.76691057499577	23.348333851585	CACNA1I;RYR2;CRACR2A;CAMK2A;ITPR1;ATP2A3;CACNA1A;ATP2B2	down
GO_Biological_Process_2021.52	peptidyl-threonine modification (GO:0018210)	6/67	0.00206655621346074	0.0799486468099408	0	0	4.94180117156222	30.549580918855	TBK1;ROCK2;LMTK2;CDC42BPA;TTBK1;CIT	down
GO_Biological_Process_2021.53	regulation of postsynapse organization (GO:0099175)	4/28	0.00210802096080899	0.0799486468099408	0	0	8.34654731457801	51.4314721686031	ARHGAP44;ARC;SRCIN1;TANC2	down
GO_Biological_Process_2021.54	regulation of protein transport (GO:0051223)	4/28	0.00210802096080899	0.0799486468099408	0	0	8.34654731457801	51.4314721686031	SCFD1;STXBP5;GAPVD1;STXBP5L	down
GO_Biological_Process_2021.55	neuron development (GO:0048666)	9/143	0.00217934400285733	0.081150845779124	0	0	3.38796303456809	20.7639153086274	TENM2;ATP8A2;TENM3;TENM4;MYT1L;NEDD4;RASGRF1;PTPRM;FRY	down
GO_Biological_Process_2021.56	cellular response to fibroblast growth factor stimulus (GO:0044344)	7/92	0.00230856566405383	0.0835685400468127	0	0	4.14311704063069	25.1533974852576	SETX;NR4A1;RBFOX2;POLR2A;POLR2B;FLRT1;CBL	down
GO_Biological_Process_2021.57	cAMP metabolic process (GO:0046058)	3/14	0.0023666871692945	0.0835685400468127	0	0	13.6321892393321	82.4238166824348	ADCY9;ADCY1;ADCY8	down
GO_Biological_Process_2021.58	positive regulation of long-term synaptic potentiation (GO:1900273)	3/14	0.0023666871692945	0.0835685400468127	0	0	13.6321892393321	82.4238166824348	ADCY1;ADCY8;EPHB2	down
GO_Biological_Process_2021.59	phosphorylation (GO:0016310)	17/400	0.00267368948824645	0.0928087469818428	0	0	2.25713180543468	13.3719167675427	ROCK2;CAMK2A;LMTK2;CDC42BPA;TTBK1;NUAK1;TBK1;NEK1;MAP3K21;SIK1;CDK12;ERG;SIK2;EPHB2;FNIP2;JAK1;MAP3K5	down
GO_Biological_Process_2021.60	regulation of long-term synaptic potentiation (GO:1900271)	4/30	0.00273530706946974	0.0932906574747201	0	0	7.7037182766083	45.4635825828803	ARC;ADCY1;ADCY8;EPHB2	down
GO_Biological_Process_2021.61	regulation of nuclear-transcribed mRNA catabolic process, deadenylation-dependent decay (GO:1900151)	3/15	0.002915333046085	0.0932906574747201	0	0	12.4955357142857	72.946078686241	TNRC6C;AGO2;TNRC6B	down
GO_Biological_Process_2021.62	regulation of nuclear-transcribed mRNA poly(A) tail shortening (GO:0060211)	3/15	0.002915333046085	0.0932906574747201	0	0	12.4955357142857	72.946078686241	TNRC6C;AGO2;TNRC6B	down
GO_Biological_Process_2021.63	positive regulation of nuclear-transcribed mRNA catabolic process, deadenylation-dependent decay (GO:1900153)	3/15	0.002915333046085	0.0932906574747201	0	0	12.4955357142857	72.946078686241	TNRC6C;AGO2;TNRC6B	down
GO_Biological_Process_2021.64	protein localization to cell-cell junction (GO:0150105)	3/15	0.002915333046085	0.0932906574747201	0	0	12.4955357142857	72.946078686241	DSP;CGNL1;JAK1	down
GO_Biological_Process_2021.65	regulation of hydrolase activity (GO:0051336)	6/73	0.00319398037057883	0.0934136151185905	0	0	4.49787054444999	25.8469562977313	ARHGAP44;CAMK2A;NF1;RAB3GAP2;PLXNA4;EPHB3	down
GO_Biological_Process_2021.66	regulation of axonogenesis (GO:0050770)	5/51	0.00326506651237011	0.0934136151185905	0	0	5.45122630992196	31.205409521671	RUFY3;MCF2;ARHGAP35;PLXNA4;EPHB3	down
GO_Biological_Process_2021.67	mitotic nuclear membrane organization (GO:0101024)	5/51	0.00326506651237011	0.0934136151185905	0	0	5.45122630992196	31.205409521671	AHCTF1;ANKLE2;NUP205;SEH1L;NUP98	down
GO_Biological_Process_2021.68	mitotic nuclear membrane reassembly (GO:0007084)	5/51	0.00326506651237011	0.0934136151185905	0	0	5.45122630992196	31.205409521671	AHCTF1;ANKLE2;NUP205;SEH1L;NUP98	down
GO_Biological_Process_2021.69	regulation of dendritic spine morphogenesis (GO:0061001)	4/32	0.00347968534752353	0.0934136151185905	0	0	7.15272195834856	40.4902243559448	ARHGAP44;ARC;SRCIN1;TANC2	down
GO_Biological_Process_2021.70	regulation of NMDA receptor activity (GO:2000310)	4/32	0.00347968534752353	0.0934136151185905	0	0	7.15272195834856	40.4902243559448	GRIA2;CAMK2A;EPHB2;GRIN2B	down
GO_Biological_Process_2021.71	gene silencing by miRNA (GO:0035195)	4/32	0.00347968534752353	0.0934136151185905	0	0	7.15272195834856	40.4902243559448	TNRC6C;AGO1;AGO2;TNRC6B	down
GO_Biological_Process_2021.72	intra-Golgi vesicle-mediated transport (GO:0006891)	4/32	0.00347968534752353	0.0934136151185905	0	0	7.15272195834856	40.4902243559448	COPB2;COPA;TRAPPC10;COPG2	down
GO_Biological_Process_2021.73	regulation of Rac protein signal transduction (GO:0035020)	3/16	0.00353596937455367	0.0934136151185905	0	0	11.5337519623234	65.1053516357486	ARHGAP44;ALS2;RASGRF1	down
GO_Biological_Process_2021.74	sympathetic nervous system development (GO:0048485)	3/16	0.00353596937455367	0.0934136151185905	0	0	11.5337519623234	65.1053516357486	NRP2;NF1;SEMA3F	down
GO_Biological_Process_2021.75	fibroblast growth factor receptor signaling pathway (GO:0008543)	6/75	0.0036560343598373	0.0934136151185905	0	0	4.36705040795797	24.505162842328	SETX;RBFOX2;POLR2A;POLR2B;FLRT1;CBL	down
GO_Biological_Process_2021.76	aggresome assembly (GO:0070842)	2/5	0.00374019357408419	0.0934136151185905	0	0	33.2519083969466	185.832210846049	TRIM37;HDAC6	down
GO_Biological_Process_2021.77	anterograde dendritic transport (GO:0098937)	2/5	0.00374019357408419	0.0934136151185905	0	0	33.2519083969466	185.832210846049	KIF3B;KIF5C	down
GO_Biological_Process_2021.78	anterograde dendritic transport of neurotransmitter receptor complex (GO:0098971)	2/5	0.00374019357408419	0.0934136151185905	0	0	33.2519083969466	185.832210846049	KIF3B;KIF5C	down
GO_Biological_Process_2021.79	regulation of phosphatidylinositol dephosphorylation (GO:0060304)	2/5	0.00374019357408419	0.0934136151185905	0	0	33.2519083969466	185.832210846049	MTMR9;MTMR4	down
GO_Biological_Process_2021.80	mRNA cleavage involved in gene silencing by miRNA (GO:0035279)	2/5	0.00374019357408419	0.0934136151185905	0	0	33.2519083969466	185.832210846049	AGO1;AGO2	down
GO_Biological_Process_2021.81	negative regulation of smooth muscle contraction (GO:0045986)	2/5	0.00374019357408419	0.0934136151185905	0	0	33.2519083969466	185.832210846049	DOCK4;KCNMA1	down
GO_Biological_Process_2021.82	neuroinflammatory response (GO:0150076)	2/5	0.00374019357408419	0.0934136151185905	0	0	33.2519083969466	185.832210846049	ADCY1;ADCY8	down
GO_Biological_Process_2021.83	neuron projection extension (GO:1990138)	4/33	0.00389883626155612	0.0962026104056256	0	0	6.90572360878384	38.3065817370353	NRP2;MAP1B;FLRT1;SEMA3F	down
GO_Biological_Process_2021.84	cilium assembly (GO:0060271)	14/314	0.00405814601950517	0.0989414648565071	0	0	2.36456692913386	13.0217387814802	DYNC2H1;FBF1;CEP164;WDR35;KIF27;HDAC6;CDC14B;KIF3B;TTC21B;BBS9;NEK1;BBS7;NINL;CLASP1	down
GO_Biological_Process_2021.85	nuclear membrane reassembly (GO:0031468)	5/54	0.00418941915273826	0.0996070740380751	0	0	5.11669283097855	28.0148817009715	AHCTF1;ANKLE2;NUP205;SEH1L;NUP98	down
GO_Biological_Process_2021.86	activation of protein kinase A activity (GO:0034199)	3/17	0.00423135519595338	0.0996070740380751	0	0	10.7093658892128	58.5291794377815	ADCY9;ADCY1;ADCY8	down
GO_Biological_Process_2021.87	RNA interference (GO:0016246)	3/17	0.00423135519595338	0.0996070740380751	0	0	10.7093658892128	58.5291794377815	DHX9;AGO1;AGO2	down
GO_Cellular_Component_2021.110	neuron projection (GO:0043005)	43/556	2.08307814861903e-14	4.74941817885139e-12	0	0	4.54631844763424	143.219690503284	PCSK2;GABRB2;GRIA2;TENM2;TENM3;TENM4;KCNA1;KCNA2;RASGRF1;CAMK2A;GRIK3;ADCY8;HDAC6;IGF1R;UNC80;ARHGAP44;CACNA1I;KIF3B;GRM7;NEFM;KIF1B;ACADM;BBS7;EPHB2;NEFH;CAMK2G;EPHB3;UNC13A;MAGEE1;CNTN6;GRIN2B;SRCIN1;ANK1;SETX;SLC4A8;ALS2;MAP1B;RUFY3;MAP1A;NF1;ADGRL1;ADGRL3;SHANK1	down
GO_Cellular_Component_2021.210	axon (GO:0030424)	22/204	1.18603442445355e-10	1.35207924387705e-08	0	0	6.29446424888784	143.86146340997	CNTN6;KCNA2;GRIK3;ATP2B3;ADCY8;SRCIN1;HDAC6;IGF1R;SETX;UNC80;GRM7;MAP1B;RUFY3;MAP1A;NF1;ADGRL1;KIF1B;NEFM;ACADM;EPHB2;NEFH;ADGRL3	down
GO_Cellular_Component_2021.310	dendrite (GO:0030425)	21/270	1.06949287968921e-07	8.12814588563801e-06	0	0	4.36479608272663	70.058953714723	GRIA2;TENM2;MAGEE1;KCNA1;KCNA2;GRIK3;ADCY8;SRCIN1;HDAC6;ARHGAP44;SLC4A8;KIF3B;GRM7;ALS2;MAP1B;RUFY3;MAP1A;NF1;KIF1B;EPHB2;SHANK1	down
GO_Cellular_Component_2021.43	microtubule (GO:0005874)	16/182	7.04231948071062e-07	4.01412210400505e-05	0	0	4.94363734621865	70.0323480544649	DYNC2H1;TUBD1;KIF27;HDAC6;KATNAL1;KIF3B;SYNJ1;KIF5C;DPP9;MAP1B;KIF26B;MAP1A;KIF21A;RADIL;KIF1B;CLASP1	down
GO_Cellular_Component_2021.51	microtubule cytoskeleton (GO:0015630)	21/331	2.98270651330667e-06	0.000136011417006784	0	0	3.49486803519062	44.4640857097385	DYNC2H1;APC2;TUBD1;LYST;KIF27;HDAC6;JAKMIP3;NUAK1;KATNAL1;KIF3B;SYNJ1;KIF5C;DPP9;MAP1B;KIF26B;MAP1A;KIF21A;KIF1B;RADIL;NINL;CLASP1	down
GO_Cellular_Component_2021.61	polymeric cytoskeletal fiber (GO:0099513)	18/256	3.69308021668115e-06	0.000140337048233884	0	0	3.88522836190179	48.6005146789638	DYNC2H1;APC2;DSP;TUBD1;TSC1;KIF27;HDAC6;KATNAL1;KIF3B;SYNJ1;KIF5C;DPP9;MAP1B;KIF26B;MAP1A;KIF21A;KIF1B;RADIL	down
GO_Cellular_Component_2021.71	asymmetric synapse (GO:0032279)	12/133	1.3338332874025e-05	0.000434448556468242	0	0	5.04516323932417	56.6312939085665	ARHGAP44;GRIA2;ARHGAP32;SLC4A8;KCND1;GRM7;IQSEC3;ADGRL1;ADCY8;SRCIN1;GRIN2B;SHANK1	down
GO_Cellular_Component_2021.81	cytoskeleton (GO:0005856)	27/600	6.67657404899598e-05	0.00190282360396385	0	0	2.43694513999545	23.4295715581024	MTCL1;ROCK2;DHX9;TCHH;ADCY8;LYST;JAKMIP3;NEURL1B;NUAK1;KIF3B;NEFM;NINL;NEFH;APC2;MCF2;CASK;CDC42BPA;SRCIN1;EFR3B;ANK1;CIT;ARHGAP32;ARC;PREPL;MYO1C;KATNAL1;SESTD1	down
GO_Cellular_Component_2021.91	postsynaptic density (GO:0014069)	11/138	9.48825676491014e-05	0.00240369171377724	0	0	4.39341371391076	40.6956225529308	ARHGAP44;GRIA2;ARHGAP32;KCND1;IQSEC3;ADGRL1;ATP2B2;ADCY8;SRCIN1;GRIN2B;SHANK1	down
GO_Cellular_Component_2021.101	excitatory synapse (GO:0060076)	5/25	0.000112355816234515	0.00256171261014695	0	0	12.5544871794872	114.16849507828	GRIA2;ITGA3;ATP2B3;ADCY8;SHANK1	down
GO_Cellular_Component_2021.111	neuron to neuron synapse (GO:0098984)	3/8	0.000397681660154203	0.00755595154292985	0	0	30	234.895761647652	GRIA2;SLC4A8;GRM7	down
GO_Cellular_Component_2021.121	RISC-loading complex (GO:0070578)	3/8	0.000397681660154203	0.00755595154292985	0	0	30	234.895761647652	DHX9;AGO1;AGO2	down
GO_Cellular_Component_2021.131	synaptic membrane (GO:0097060)	4/26	0.00158776246618171	0.0268899140659643	0	0	9.10625435945129	58.6937205542637	SYNJ1;ITGA3;ATP2B2;GRIN2B	down
GO_Cellular_Component_2021.141	sarcoplasmic reticulum (GO:0016529)	5/45	0.00186996481121002	0.0268899140659643	0	0	6.27083333333333	39.3923444877929	RYR2;NOS1AP;ATP2A3;ITPR1;AKAP6	down
GO_Cellular_Component_2021.151	COPI vesicle coat (GO:0030126)	3/13	0.001887011513401	0.0268899140659643	0	0	14.9961734693878	94.0674107560945	COPB2;COPA;COPG2	down
GO_Cellular_Component_2021.161	RISC complex (GO:0016442)	3/13	0.001887011513401	0.0268899140659643	0	0	14.9961734693878	94.0674107560945	DHX9;AGO1;AGO2	down
GO_Cellular_Component_2021.171	sarcoplasmic reticulum membrane (GO:0033017)	4/28	0.00210802096080899	0.0282722811214382	0	0	8.34654731457801	51.4314721686031	RYR2;NOS1AP;ATP2A3;AKAP6	down
GO_Cellular_Component_2021.181	apicolateral plasma membrane (GO:0016327)	2/5	0.00374019357408419	0.0448823228890103	0	0	33.2519083969466	185.832210846049	MTCL1;NEDD4	down
GO_Cellular_Component_2021.191	neurofibrillary tangle (GO:0097418)	2/5	0.00374019357408419	0.0448823228890103	0	0	33.2519083969466	185.832210846049	NEFM;NEFH	down
GO_Cellular_Component_2021.201	COPI-coated vesicle membrane (GO:0030663)	3/17	0.00423135519595338	0.0482374492338686	0	0	10.7093658892128	58.5291794377815	COPB2;COPA;COPG2	down
GO_Cellular_Component_2021.211	aggresome (GO:0016235)	4/35	0.00483694793597163	0.0525154347334063	0	0	6.45953304182823	34.4388153397904	URB2;TRIM37;HDAC6;TRIM66	down
GO_Cellular_Component_2021.221	vesicle coat (GO:0030120)	4/36	0.00535817995007181	0.0555302285734715	0	0	6.25735294117647	32.7205177615647	COPB2;COPA;COPG2;SEC23B	down
GO_Cellular_Component_2021.231	caveola (GO:0005901)	5/60	0.00657328643773131	0.065161274252293	0	0	4.55710955710956	22.8982968404866	KCNMA1;NOS1AP;AKAP6;ADCY8;HDAC6	down
GO_Cellular_Component_2021.241	protein kinase complex (GO:1902911)	2/7	0.00765113176551233	0.0726857517723671	0	0	19.9491094147583	97.2100491583581	IGF1R;MAP3K5	down
GO_Molecular_Function_2021.110	metal ion transmembrane transporter activity (GO:0046873)	7/27	7.0172613535179e-07	0.000272971466651846	0	0	17.666881443299	250.334809781908	MRS2;SLC4A8;KCNA1;ATP2A3;ITPR1;ATP2B3;CNNM2	down
GO_Molecular_Function_2021.210	GTPase activator activity (GO:0005096)	21/336	3.77134849457966e-06	0.000733527282195744	0	0	3.43850267379679	42.9402893514798	RAP1GAP2;DOCK4;DENND1A;RASGRF2;MYCBP2;RASGRF1;AGAP2;TBC1D9;GAPVD1;ARHGAP35;STXBP5L;ARHGAP44;ARHGAP32;RALGAPB;ALS2;NF1;RAB3GAP2;STXBP5;DEPDC5;SEC23B;TBC1D16	down
GO_Molecular_Function_2021.310	motor activity (GO:0003774)	9/66	5.71662178617767e-06	0.000741255291607705	0	0	7.9961821652577	96.530970783962	DYNC2H1;DNAH1;KIF3B;KIF5C;KIF26B;KIF1B;KIF21A;SMC3;KIF27	down
GO_Molecular_Function_2021.410	microtubule motor activity (GO:0003777)	8/56	1.33763274521288e-05	0.00126350206484402	0	0	8.42248062015504	94.5172798387325	DNAH1;KIF3B;KIF5C;KIF26B;KIF1B;KIF21A;SMC3;KIF27	down
GO_Molecular_Function_2021.54	microtubule binding (GO:0008017)	16/232	1.62403864375838e-05	0.00126350206484402	0	0	3.78950454412196	41.7906918403901	APC2;MTCL1;KIF27;HDAC6;EML6;KIF3B;NAV3;KIF5C;MAP1B;KIF26B;MAP1A;KIF21A;KIF1B;NEFM;NEFH;CLASP1	down
GO_Molecular_Function_2021.61	tubulin binding (GO:0015631)	18/307	4.31570598195186e-05	0.00279801604496546	0	0	3.19117417602085	32.0734211405281	APC2;AGTPBP1;MTCL1;SMC3;KIF27;HDAC6;EML6;KIF3B;NAV3;KIF5C;MAP1B;KIF26B;MAP1A;KIF21A;KIF1B;NEFM;NEFH;CLASP1	down
GO_Molecular_Function_2021.71	GTPase regulator activity (GO:0030695)	15/233	6.55737927735938e-05	0.00364402934127543	0	0	3.51044181554804	33.813749607377	RAP1GAP2;AGAP2;TBC1D9;ARHGAP35;STXBP5L;ARHGAP44;ARHGAP32;RALGAPB;ALS2;NF1;RAB3GAP2;STXBP5;DEPDC5;SEC23B;TBC1D16	down
GO_Molecular_Function_2021.81	protein phosphatase binding (GO:0019903)	10/123	0.000166671058290673	0.00743913303714555	0	0	4.48040455120101	38.9772274151635	PTPRT;ANKLE2;TBK1;AKAP11;MTMR9;MTMR4;ADCY8;ANK1;MAP3K5;JAK1	down
GO_Molecular_Function_2021.91	phosphatidylinositol-3-phosphatase activity (GO:0004438)	4/15	0.00017211361782599	0.00743913303714555	0	0	18.2227388979307	157.942960411922	SYNJ1;MTMR9;MTMR4;MTMR7	down
GO_Molecular_Function_2021.101	phosphatidylinositol monophosphate phosphatase activity (GO:0052744)	4/17	0.000290848602198336	0.0113140106255153	0	0	15.4176667322447	125.541553517061	SYNJ1;MTMR9;MTMR4;MTMR7	down
GO_Molecular_Function_2021.11	P-type calcium transporter activity (GO:0005388)	3/9	0.000587796084856776	0.0207866070008442	0	0	24.9987244897959	185.968772930033	ATP2A3;ATP2B3;ATP2B2	down
GO_Molecular_Function_2021.12	voltage-gated cation channel activity (GO:0022843)	8/97	0.00067451975190208	0.0218656819574924	0	0	4.53293847806521	33.0972938091625	HCN4;CACNA1I;KCND1;KCNA1;KCNMA1;KCNA2;CACNA1A;GRIN2B	down
GO_Molecular_Function_2021.13	ubiquitin-like protein ligase activity (GO:0061659)	14/270	0.00101370914907686	0.0303332968454538	0	0	2.77729248687664	19.1470411430289	SHPRH;AREL1;PELI3;MYCBP2;UBR3;CBL;SH3RF3;NEURL1B;UFL1;HECTD1;NEDD4;UBR5;TRIM37;RNF165	down
GO_Molecular_Function_2021.14	SH3 domain binding (GO:0017124)	6/62	0.00138232235509175	0.0358482264087128	0	0	5.38441057656996	35.4509071593929	SYNJ1;DPYSL3;SYNJ2;CBL;SOCS7;SHANK1	down
GO_Molecular_Function_2021.15	syntaxin binding (GO:0019905)	6/62	0.00138232235509175	0.0358482264087128	0	0	5.38441057656996	35.4509071593929	SCFD1;UNC13A;CACNA1A;STXBP5;CPLX2;STXBP5L	down
GO_Molecular_Function_2021.16	PDZ domain binding (GO:0030165)	6/63	0.00150284308146027	0.0365378724180027	0	0	5.28967663374374	34.3849958845591	DOCK4;KIDINS220;ATP2B3;ATP2B2;SYNJ2;CIT	down
GO_Molecular_Function_2021.17	RNA 7-methylguanosine cap binding (GO:0000340)	3/13	0.001887011513401	0.040780415484055	0	0	14.9961734693878	94.0674107560945	CYFIP2;AGO2;GEMIN5	down
GO_Molecular_Function_2021.18	P-type ion transporter activity (GO:0015662)	3/13	0.001887011513401	0.040780415484055	0	0	14.9961734693878	94.0674107560945	ATP2A3;ATP2B3;ATP2B2	down
GO_Molecular_Function_2021.19	ubiquitin protein ligase activity (GO:0061630)	13/263	0.00231140249093542	0.0473229246828357	0	0	2.63471204188482	15.9924407301466	SHPRH;AREL1;PELI3;MYCBP2;UBR3;CBL;SH3RF3;NEURL1B;HECTD1;NEDD4;UBR5;TRIM37;RNF165	down
GO_Molecular_Function_2021.20	RNA polymerase II complex binding (GO:0000993)	4/32	0.00347968534752353	0.0522981829567355	0	0	7.15272195834856	40.4902243559448	DHX9;AGO1;AGO2;ELP2	down
GO_Molecular_Function_2021.21	transmembrane receptor protein phosphatase activity (GO:0019198)	3/16	0.00353596937455367	0.0522981829567355	0	0	11.5337519623234	65.1053516357486	PTPRT;PTPRB;PTPRM	down
GO_Molecular_Function_2021.22	transmembrane receptor protein tyrosine phosphatase activity (GO:0005001)	3/16	0.00353596937455367	0.0522981829567355	0	0	11.5337519623234	65.1053516357486	PTPRT;PTPRB;PTPRM	down
GO_Molecular_Function_2021.23	protein serine/threonine kinase activity (GO:0004674)	15/344	0.00367555264698436	0.0522981829567355	0	0	2.3127499600064	12.9653960241873	TRIO;ROCK2;CAMK2A;CASK;LMTK2;CDC42BPA;TTBK1;CIT;NUAK1;TBK1;SIK1;SIK2;CDK12;CAMK2G;MAP3K5	down
GO_Molecular_Function_2021.24	ATP binding (GO:0005524)	13/278	0.0037155112266284	0.0522981829567355	0	0	2.48365109157364	13.8966214469983	DHX9;HSPA4;HSPA4L;AGAP2;LIG4;LMTK2;CDC42BPA;MSH6;MTHFD1L;PPIP5K1;SIK1;SIK2;MAP3K5	down
GO_Molecular_Function_2021.25	ankyrin repeat binding (GO:0071532)	2/5	0.00374019357408419	0.0522981829567355	0	0	33.2519083969466	185.832210846049	KIF21A;SHANK1	down
GO_Molecular_Function_2021.26	ATPase inhibitor activity (GO:0042030)	2/5	0.00374019357408419	0.0522981829567355	0	0	33.2519083969466	185.832210846049	TSC1;FNIP2	down
GO_Molecular_Function_2021.27	transcription coregulator binding (GO:0001221)	5/53	0.00386287933616571	0.0522981829567355	0	0	5.22355769230769	29.0238752495232	USP11;ZBTB16;CHD6;HDAC6;CIT	down
GO_Molecular_Function_2021.28	RNA polymerase core enzyme binding (GO:0043175)	4/33	0.00389883626155612	0.0522981829567355	0	0	6.90572360878384	38.3065817370353	DHX9;AGO1;AGO2;ELP2	down
GO_Molecular_Function_2021.29	basal RNA polymerase II transcription machinery binding (GO:0001099)	4/33	0.00389883626155612	0.0522981829567355	0	0	6.90572360878384	38.3065817370353	DHX9;AGO1;AGO2;ELP2	down
GO_Molecular_Function_2021.30	ionotropic glutamate receptor activity (GO:0004970)	3/17	0.00423135519595338	0.0539189673841331	0	0	10.7093658892128	58.5291794377815	GRIA2;GRIK3;GRIN2B	down
GO_Molecular_Function_2021.31	protein heterodimerization activity (GO:0046982)	10/188	0.00429688429025225	0.0539189673841331	0	0	2.83481686852473	15.4493695239852	NR4A1;TOP2B;ARNT2;TENM2;RALGAPB;TENM3;TENM4;ITGA3;SMC3;ADCY8	down
GO_Molecular_Function_2021.32	calcium ion transmembrane transporter activity (GO:0015085)	5/55	0.00453518672543943	0.0551308636311231	0	0	5.01410256410256	27.0555409806482	RYR2;ATP2A3;ITPR1;ATP2B3;ATP2B2	down
GO_Molecular_Function_2021.33	RNA cap binding (GO:0000339)	3/19	0.00585617312620458	0.0650871813169595	0	0	9.36973852040816	48.1628821843003	CYFIP2;AGO2;GEMIN5	down
GO_Molecular_Function_2021.34	glutamate receptor activity (GO:0008066)	3/19	0.00585617312620458	0.0650871813169595	0	0	9.36973852040816	48.1628821843003	GRIA2;GRM7;GRIK3	down
GO_Molecular_Function_2021.35	ligand-gated calcium channel activity (GO:0099604)	3/19	0.00585617312620458	0.0650871813169595	0	0	9.36973852040816	48.1628821843003	RYR2;ITPR1;GRIN2B	down
GO_Molecular_Function_2021.36	transmembrane receptor protein tyrosine kinase activity (GO:0004714)	5/60	0.00657328643773131	0.0710280117854855	0	0	4.55710955710956	22.8982968404866	NRP2;LMTK2;EPHB2;IGF1R;EPHB3	down
GO_Molecular_Function_2021.37	omega peptidase activity (GO:0008242)	7/113	0.00717053105119039	0.0753874751057585	0	0	3.31873662711535	16.3871766120813	USP47;USP7;USP15;USP32;USP11;APEH;USP29	down
GO_Molecular_Function_2021.38	phosphatase binding (GO:0019902)	7/114	0.00751377084937423	0.0760107480368608	0	0	3.28755178726274	16.0794744045573	PTPRT;TBK1;MTMR9;MTMR4;ANK1;MAP3K5;JAK1	down
GO_Molecular_Function_2021.39	phosphatidylinositol-4,5-bisphosphate 5-phosphatase activity (GO:0004439)	2/7	0.00765113176551233	0.0760107480368608	0	0	19.9491094147583	97.2100491583581	SYNJ1;SYNJ2	down
GO_Molecular_Function_2021.40	tau protein binding (GO:0048156)	4/40	0.00781601522229931	0.0760107480368608	0	0	5.56095481670929	26.9794194866877	ROCK2;MAP1A;HDAC6;TTBK1	down
GO_Molecular_Function_2021.41	adenyl ribonucleotide binding (GO:0032559)	13/306	0.00814273762718443	0.0772567057798718	0	0	2.24305344602684	10.7904975919006	DHX9;HSPA4;HSPA4L;AGAP2;LIG4;LMTK2;CDC42BPA;MSH6;MTHFD1L;PPIP5K1;SIK1;SIK2;MAP3K5	down
GO_Molecular_Function_2021.42	syntaxin-1 binding (GO:0017075)	3/22	0.00890920555462245	0.082516213351146	0	0	7.8890977443609	37.2418286646915	UNC13A;STXBP5;CPLX2	down
GO_Molecular_Function_2021.43	potassium channel activity (GO:0005267)	6/91	0.00931652688243399	0.0833366928316253	0	0	3.54211401784364	16.5628024905319	HCN4;KCND1;KCNA1;KCNMA1;KCNA2;GRIK3	down
GO_Molecular_Function_2021.44	guanyl-nucleotide exchange factor activity (GO:0005085)	8/149	0.00963572568761592	0.0833366928316253	0	0	2.85359283083182	13.2471702552663	DOCK4;ALS2;DENND1A;RASGRF2;MYCBP2;RASGRF1;RAB3GAP2;GAPVD1	down
GO_Molecular_Function_2021.45	siRNA binding (GO:0035197)	2/8	0.0100689577457234	0.0833366928316253	0	0	16.6234096692112	76.4393927405421	DHX9;AGO2	down
GO_Molecular_Function_2021.46	U1 snRNA binding (GO:0030619)	2/8	0.0100689577457234	0.0833366928316253	0	0	16.6234096692112	76.4393927405421	GEMIN5;PRPF8	down
GO_Molecular_Function_2021.47	phosphatidylinositol phosphate 5-phosphatase activity (GO:0034595)	2/8	0.0100689577457234	0.0833366928316253	0	0	16.6234096692112	76.4393927405421	SYNJ1;SYNJ2	down
GO_Molecular_Function_2021.48	ubiquitin-protein transferase activity (GO:0004842)	15/392	0.0116443728984803	0.093680370440267	0	0	2.0132625994695	8.96492191394313	SHPRH;AREL1;PELI3;MYCBP2;UBR3;FBXO10;CBL;SH3RF3;NEURL1B;HECTD1;NEDD4;UBR5;TTC3;TRIM37;RNF165	down
GO_Molecular_Function_2021.49	single-stranded RNA binding (GO:0003727)	4/45	0.0118003551454321	0.093680370440267	0	0	4.88154201235107	21.6722191339452	AQR;DHX9;AGO1;AGO2	down
GO_Molecular_Function_2021.50	adenylate cyclase inhibiting G protein-coupled glutamate receptor activity (GO:0001640)	2/9	0.0127778704233758	0.0937847470696829	0	0	14.2479098509633	62.1214636693487	GRM7;GRIK3	down
GO_Molecular_Function_2021.51	G protein-coupled glutamate receptor activity (GO:0098988)	2/9	0.0127778704233758	0.0937847470696829	0	0	14.2479098509633	62.1214636693487	GRM7;GRIK3	down
GO_Molecular_Function_2021.52	magnesium ion transmembrane transporter activity (GO:0015095)	2/9	0.0127778704233758	0.0937847470696829	0	0	14.2479098509633	62.1214636693487	MRS2;CNNM2	down
GO_Molecular_Function_2021.53	phosphatidylinositol-4,5-bisphosphate phosphatase activity (GO:0106019)	2/9	0.0127778704233758	0.0937847470696829	0	0	14.2479098509633	62.1214636693487	SYNJ1;SYNJ2	down
KEGG_2019_Mouse.1	Circadian entrainment	11/99	4.12648226668773e-06	0.000808790524270795	0	0	6.35319010416667	78.7673926184044	GRIA2;CACNA1I;RYR2;ADCY9;NOS1AP;CAMK2A;ITPR1;ADCY1;ADCY8;GRIN2B;CAMK2G	down
KEGG_2019_Mouse.2	Glutamatergic synapse	11/114	1.61767007109076e-05	0.00158531666966894	0	0	5.4237965210356	59.8349900833767	GRIA2;ADCY9;GRM7;PLA2G4E;ITPR1;GRIK3;CACNA1A;ADCY1;ADCY8;GRIN2B;SHANK1	down
KEGG_2019_Mouse.3	Aldosterone synthesis and secretion	10/102	3.41293193145421e-05	0.00222978219521675	0	0	5.50903444381705	56.6623680158141	CACNA1I;NR4A1;ADCY9;CAMK2A;ITPR1;ATP2B3;ATP2B2;ADCY1;ADCY8;CAMK2G	down
KEGG_2019_Mouse.4	Pancreatic secretion	9/105	0.000236173092907756	0.0115724815524801	0	0	4.73826101036269	39.5689598283599	RYR2;ADCY9;KCNMA1;ITPR1;ATP2A3;ATP2B3;ATP2B2;ADCY1;ADCY8	down
KEGG_2019_Mouse.5	Long-term potentiation	7/67	0.000348770995139012	0.0128564684851742	0	0	5.87693298969072	46.7868219895721	GRIA2;CAMK2A;ITPR1;ADCY1;ADCY8;CAMK2G;GRIN2B	down
KEGG_2019_Mouse.6	Calcium signaling pathway	12/189	0.000393565361791046	0.0128564684851742	0	0	3.43904058060805	26.9629839960758	CACNA1I;RYR2;ADCY9;CAMK2A;ITPR1;ATP2A3;CACNA1A;ATP2B3;ATP2B2;ADCY1;ADCY8;CAMK2G	down
KEGG_2019_Mouse.7	Amyotrophic lateral sclerosis (ALS)	6/52	0.000540040432433955	0.0151211321081507	0	0	6.55828769419917	49.343681383601	GRIA2;ALS2;NEFM;NEFH;GRIN2B;MAP3K5	down
KEGG_2019_Mouse.8	Salivary secretion	7/78	0.000880422625458676	0.0215703543237376	0	0	4.96362712356614	34.9196554153578	ADCY9;KCNMA1;ITPR1;ATP2B3;ATP2B2;ADCY1;ADCY8	down
KEGG_2019_Mouse.9	cAMP signaling pathway	12/211	0.00104163640677414	0.0226845261919701	0	0	3.05538134536914	20.9811886158192	HCN4;RYR2;GRIA2;ADCY9;ROCK2;CAMK2A;ATP2B3;ATP2B2;ADCY1;ADCY8;GRIN2B;CAMK2G	down
KEGG_2019_Mouse.10	Insulin secretion	7/86	0.00156562411314532	0.0306862326176483	0	0	4.45915437818087	28.8037772316501	RYR2;ADCY9;KCNMA1;CAMK2A;ADCY1;ADCY8;CAMK2G	down
KEGG_2019_Mouse.11	GnRH signaling pathway	7/90	0.00203586906161342	0.0336286455271412	0	0	4.24338591479319	26.2955517211462	ADCY9;PLA2G4E;CAMK2A;ITPR1;ADCY1;ADCY8;CAMK2G	down
KEGG_2019_Mouse.12	Oocyte meiosis	8/116	0.00214681589984697	0.0336286455271412	0	0	3.73184036749928	22.9275670712092	ADCY9;CAMK2A;ITPR1;ADCY1;SMC3;ADCY8;CAMK2G;IGF1R	down
KEGG_2019_Mouse.13	cGMP-PKG signaling pathway	10/172	0.00227284385120632	0.0336286455271412	0	0	3.11736411736412	18.9745332245265	ADCY9;ROCK2;KCNMA1;IRS4;ITPR1;ATP2A3;ATP2B3;ATP2B2;ADCY1;ADCY8	down
KEGG_2019_Mouse.14	Cortisol synthesis and secretion	6/69	0.00240204610908151	0.0336286455271412	0	0	4.78442893867058	28.8569690907483	CACNA1I;NR4A1;ADCY9;ITPR1;ADCY1;ADCY8	down
KEGG_2019_Mouse.15	Inositol phosphate metabolism	6/73	0.00319398037057883	0.0390292036907677	0	0	4.49787054444999	25.8469562977313	FIG4;SYNJ1;PIK3C3;SYNJ2;MTMR4;MTMR7	down
KEGG_2019_Mouse.16	Phosphatidylinositol signaling system	7/98	0.0032977079416299	0.0390292036907677	0	0	3.86875495638382	22.1081070338186	PPIP5K1;SYNJ1;ITPR1;PIK3C3;SYNJ2;MTMR4;MTMR7	down
KEGG_2019_Mouse.17	Gastric acid secretion	6/74	0.00341920477375631	0.0390292036907677	0	0	4.43149856343566	25.1635878017716	ADCY9;CAMK2A;ITPR1;ADCY1;ADCY8;CAMK2G	down
KEGG_2019_Mouse.18	Oxytocin signaling pathway	9/154	0.00358431462466234	0.0390292036907677	0	0	3.12917634447025	17.6209802865702	RYR2;ADCY9;PLA2G4E;ROCK2;CAMK2A;ITPR1;ADCY1;ADCY8;CAMK2G	down
KEGG_2019_Mouse.19	Cushing syndrome	9/159	0.00442117625951405	0.0456079235191976	0	0	3.0240932642487	16.3946664947015	APC2;CACNA1I;NR4A1;ADCY9;CAMK2A;ITPR1;ADCY1;ADCY8;CAMK2G	down
KEGG_2019_Mouse.20	Ovarian steroidogenesis	5/57	0.0052868012639761	0.0518106523869658	0	0	4.82075936883629	25.2730329423716	ADCY9;PLA2G4E;ADCY1;ADCY8;IGF1R	down
KEGG_2019_Mouse.21	Long-term depression	5/61	0.00704685641540835	0.0638829130015144	0	0	4.47550366300366	22.1768978667038	GRIA2;PLA2G4E;ITPR1;CACNA1A;IGF1R	down
KEGG_2019_Mouse.22	Cholinergic synapse	7/113	0.00717053105119039	0.0638829130015144	0	0	3.31873662711535	16.3871766120813	ADCY9;CAMK2A;ITPR1;CACNA1A;ADCY1;ADCY8;CAMK2G	down
KEGG_2019_Mouse.23	Nicotine addiction	4/40	0.00781601522229931	0.0666060427639419	0	0	5.56095481670929	26.9794194866877	GRIA2;GABRB2;CACNA1A;GRIN2B	down
KEGG_2019_Mouse.24	Adrenergic signaling in cardiomyocytes	8/148	0.00927285063683877	0.07572828020085	0	0	2.87412329272794	13.4528066769614	RYR2;ADCY9;CAMK2A;ATP2B3;ATP2B2;ADCY1;ADCY8;CAMK2G	down
KEGG_2019_Mouse.25	Retrograde endocannabinoid signaling	8/150	0.0100090659280652	0.078471076876031	0	0	2.83335153037086	13.0454984616493	GRIA2;GABRB2;ADCY9;ITPR1;CACNA1A;NDUFS1;ADCY1;ADCY8	down
KEGG_2019_Mouse.26	Amphetamine addiction	5/68	0.0110454762924922	0.0832658982049409	0	0	3.97680097680098	17.9184086455155	GRIA2;ARC;CAMK2A;CAMK2G;GRIN2B	down
KEGG_2019_Mouse.27	mTOR signaling pathway	8/154	0.0116105776722031	0.0842841934722895	0	0	2.75515910941206	12.276544661729	SEH1L;WDR59;GRB10;TSC1;DEPDC5;LPIN1;FNIP2;IGF1R	down
KEGG_2019_Mouse.28	Platelet activation	7/125	0.0121342186695967	0.0849395306871772	0	0	2.97940328499039	13.1443104255972	ADCY9;PLA2G4E;ROCK2;ITPR1;ADCY1;ADCY8;ARHGAP35	down
KEGG_2019_Mouse.29	Inflammatory mediator regulation of TRP channels	7/127	0.0131550911427786	0.0889102711718829	0	0	2.92944587628866	12.6872731777729	ADCY9;PLA2G4E;CAMK2A;ITPR1;ADCY1;ADCY8;CAMK2G	down
