# Supplementary material for: Translatome profiling in fatal familial insomnia implicates TOR signaling in somatostatin neurons
Source: Life Sci Alliance. 2022 Oct 3;5(11):e202201530. doi: 10.26508/lsa.202201530 (PMC9531780; doi:10.26508/lsa.202201530)
Supplement: Supplementary file 5 [file LSA-2022-01530_TableS5.xlsx]

## Sheet: Annotated_nodes_SST
name	module	lfc_FFI	fdr_FFI	lfc_CJD	fdr_CJD	DEG	degree	betweenness
Ccdc82	5	-0.294528685873148	0.0959670127432071	-0.0868721233928154	0.645471053415934	neither	135	NA
Erp29	2	0.200397312510606	0.283157344918269	0.0706478361039899	0.706037623668845	neither	142	NA
Pomgnt2	2	-0.0482394017774761	0.846784618396687	-0.0100813753518183	0.970515426787394	neither	142	NA
Cbarp	2	0.111835455732237	0.597817364490524	0.0509752268801833	0.802128113489335	neither	143	NA
Bola2	2	0.159835183103065	0.37470797895823	0.107532879077437	0.456819533183128	neither	144	NA
Chgb	2	-0.0513625230118301	0.832065448476012	-0.0444167876887394	0.835499216110483	neither	144	NA
Psmd4	2	0.193922969021615	0.296484062103787	0.0865135013203301	0.659197866323535	neither	144	NA
Ndufaf2	2	0.168265374633004	0.387607586451959	0.0589869526927	0.756165471732491	neither	147	NA
Clstn1	2	-0.0957134211833267	0.654936290512079	-0.0433404685261908	0.837000663400563	neither	148	NA
Tomm7	2	0.169941167312328	0.382079414984802	0.110698560147354	0.557159445848442	neither	149	NA
Clstn3	2	0.056724989287188	0.817830276754944	0.0207257408804633	0.930685915109132	neither	155	NA
Nomo1	2	-0.0515107113191918	0.835447124592332	-0.0361623990042173	0.870015355706884	neither	155	NA
Tmsb10	2	0.150826016575845	0.431242035092172	0.0932993278814487	0.61138302350632	neither	155	NA
Rab3a	2	0.10323828803389	0.608476093103021	0.065810748452288	0.744068427503062	neither	156	NA
Mlf2	2	0.107414126497428	0.581955408134617	0.0716037707744458	0.716448126747348	neither	159	NA
Eno2	2	0.0224174374020747	0.930476460111231	0.0161541018395881	0.949004583649975	neither	165	NA
Mtch1	2	0.121695424254633	0.553598031039595	0.0597803683838774	0.757202852872039	neither	186	NA
Ythdc1	5	0.0531079594197189	0.830789927225332	0.0147676980434701	0.949885307022266	neither	202	NA
Parva	6	-0.0184481156267492	0.934708224237381	-0.00835293428297766	0.973778848557775	neither	45	NA
Hpcal4	6	0.0514803227339028	0.793261182344462	0.031905048972778	0.891007279618119	neither	47	NA
Adar	1	-0.275277719788314	0.0665115187958406	-0.109251135494098	0.56756221319264	neither	551	NA
Mta3	1	-0.383700251399271	0.0214651953696239	-0.165048142212004	0.338652533606433	FFI	551	NA
Vps11	1	-0.280946518686802	0.0974455419853203	-0.0429302560859659	0.837000663400563	neither	551	NA
Carm1	1	-0.112829623588243	0.544940946619274	-0.0266462586912631	0.912226967069883	neither	554	NA
Pdxk	1	-0.231619192655243	0.1489105141249	-0.0998741950699596	0.606003178185445	neither	554	NA
Dab2ip	1	-0.19305144020301	0.254287442306252	-0.0358702057460665	0.877787796543643	neither	557	NA
Gba2	1	-0.26394138282753	0.126311373637936	-0.101658257508509	0.595256456209146	neither	559	NA
Depdc5	1	-0.407824851443047	0.00959593668437181	-0.161547600894564	0.353414668514068	FFI	560	NA
Rap1gap	1	-0.216374138284121	0.238755212813872	-0.0535973324878475	0.78965011104496	neither	562	NA
Map3k4	1	-0.290601455606082	0.0815787122445927	-0.0854387525996527	0.66998440759835	neither	563	NA
Osbp2	1	-0.278786919981943	0.088965862363354	-0.128110908140229	0.452799310143646	neither	563	NA
Cabin1	1	-0.281310170333735	0.110469304493874	-0.0619989490693812	0.754683275874537	neither	568	NA
Dusp8	1	-0.125403655653495	0.513961655180898	-0.0205306671160294	0.933397460915481	neither	569	NA
Abcg4	1	-0.1572250330158	0.396832658653303	-0.0763990168456347	0.702669555097647	neither	570	NA
Ptprs	1	-0.266999560140212	0.109510800622533	-0.111619468435001	0.555735863498618	neither	570	NA
Pdzd4	1	-0.221896436447858	0.180787696340232	-0.0793829772856091	0.691578355494155	neither	573	NA
Abcf2	1	-0.190979815769612	0.254287442306252	-0.0618312367168835	0.759059172294701	neither	576	NA
Kif1a	1	-0.321140504439646	0.0624319375248515	-0.12774444977559	0.475087133241463	neither	576	NA
Nol6	1	-0.264266592211373	0.135594643025948	-0.054319092166407	0.781383592731254	neither	576	NA
Tecpr1	1	-0.248826495378627	0.164880939107907	-0.0393747967847121	0.854657215636055	neither	576	NA
Gtf3c1	1	-0.399125621817393	0.0188779486074716	-0.164504616674754	0.343746796454012	FFI	585	NA
Smarca2	1	-0.18949435213067	0.262765033913644	-0.0682554043455101	0.730321012554845	neither	586	NA
Kdm4a	1	-0.313492839393831	0.0562556234095647	-0.100497658855023	0.604955725021849	neither	591	NA
Rusc2	1	-0.330964929389382	0.0539948281202737	-0.117682829735004	0.526467262439061	neither	598	NA
Abr	1	-0.158333875155958	0.333286382679212	-0.0144027885725809	0.955653497082027	neither	602	NA
Kcnq2	1	-0.22684769064651	0.158382970392794	-0.0799509232200954	0.689171321890613	neither	604	NA
Wdr81	1	-0.240006602447915	0.187437876450754	-0.0704161335475258	0.713646264109118	neither	614	NA
Rab10	4	-0.0314640932736425	0.903539525372696	-0.063343024559063807	0.712646951850089	neither	890	NA
Pten	4	-0.0339628465047654	0.888111718091387	-0.0464452237367822	0.774930846127118	neither	909	NA
Slc6a15	4	0.0246602434196063	0.925427020032592	-0.0377426459799071	0.852056993581413	neither	909	NA
Rab14	4	-0.0073297928409155	0.979953652827359	-0.0648831348412315	0.731902250093011	neither	912	NA
Slc25a16	4	0.012892465921387	0.961307647124654	-0.0209661289674185	0.914491468980748	neither	914	NA
Negr1	4	-0.0148094861125628	0.955745197261032	-0.0455301963598894	0.794641983736357	neither	920	NA
Septin7	4	-0.0231254119795215	0.925777976603328	-0.0556074849086092	0.718314775941309	neither	925	NA
Azin1	4	-0.0301581010354556	0.905716347462875	-0.0664275114755129	0.706897614231355	neither	942	NA
Appbp2	3	-0.0543306266481921	0.826110549180504	-0.0467969543772754	0.811954879044364	neither	944	NA
Mctp1	3	-0.042425070653269	0.865928139770984	-0.0671781310037835	0.683156196622386	neither	944	NA
Abca5	3	-0.0965754218654075	0.655877202224889	-0.0718490096645191	0.671589461138039	neither	945	NA
Cdc27	3	-0.0475122519959327	0.842649124483854	-0.0421762848888658	0.802128113489335	neither	949	NA
Slc38a2	4	-0.0063343526407584	0.982256375363639	-0.053583913978271	0.78185410148052	neither	951	NA
Dpp10	3	-0.0441050716180128	0.859697334507765	-0.0628548924117457	0.752529944600109	neither	959	NA
Nampt	3	-0.0451388497209914	0.854020128137317	-0.0383462551577986	0.836180336627621	neither	959	NA
Zdhhc17	3	-0.0592227906327267	0.807194554713142	-0.0535874929894789	0.781383592731254	neither	960	NA
Nr1d2	3	-0.0234059075244542	0.928165781738463	-0.0395324093975212	0.826229930041571	neither	965	NA
Dzip3	3	-0.0346564739751324	0.88850837547751	-0.0500306994921261	0.755345262867714	neither	970	NA
Rab1a	3	0.00176916960996225	0.993665507056426	-0.0426876718608175	0.794880765289817	neither	975	NA
1110051M20Rik	1	0.0897990103364898	0.679153569212642	0.118657605182996	0.524777484505602	neither	NA	NA
1700003E16Rik	1	0.0714568935822268	0.760098182160451	0.00618419491346862	0.980529428057025	neither	NA	NA
1810009A15Rik	1	0.0157039165442184	0.953042207095514	-0.0195714600748959	0.93448596819558	neither	NA	NA
2210016L21Rik	1	0.036633658600114	0.887914342941979	0.0353820703418495	0.874070446324065	neither	NA	NA
2310061I04Rik	1	0.0322286993163072	0.894660006687289	0.0401670641403322	0.852261455876408	neither	NA	NA
2410002F23Rik	1	-0.0298483387214316	0.893026662236446	0.042131555069178	0.849714366438224	neither	NA	NA
2610507B11Rik	1	-0.0834687014265953	0.685738993628838	0.0281607965393793	0.903219880740835	neither	NA	NA
4930402H24Rik	1	-0.13871606959035299	0.462521358740381	-0.0603175792880269	0.765053354766193	neither	NA	NA
4932438A13Rik	1	-0.384077816175312	0.0151676209534848	-0.138551856306002	0.434567599465018	FFI	NA	NA
4933427D14Rik	1	-0.282161668782974	0.113045234392773	-0.0982358768902935	0.426718529304088	neither	NA	NA
5730409E04Rik	1	-0.0386212482332519	0.866481952944982	0.0119431071266628	0.964874651113564	neither	NA	NA
6030458C11Rik	1	-0.230695404107986	0.189247745843431	-0.033487094842958	0.885645695193013	neither	NA	NA
6430548M08Rik	1	-0.191421136699808	0.178544316324009	-0.0257585297012213	0.915284958496481	neither	NA	NA
9130401M01Rik	1	0.0526114772021042	0.832532637867296	0.0521570960788985	0.793208072951903	neither	NA	NA
9930104L06Rik	1	-0.309768983650178	0.0589282519491139	-0.0143158031539188	0.948181843633952	neither	NA	NA
A930011G23Rik	1	-0.117089962226478	0.532033764123094	0.075523481452005	0.703617579217403	neither	NA	NA
Aaas	1	-0.328701596023579	0.0589282519491139	-0.0389665232341978	0.830199267640953	neither	NA	NA
Aagab	1	-0.115571018332462	0.566247849925991	-0.0859875929340315	0.668046851547413	neither	NA	NA
Aamp	1	0.0248519028720411	0.922608688642358	0.0334036428725805	0.88352867829608	neither	NA	NA
Aar2	1	-0.10452425117524	0.577453716859752	-0.00351353710194788	0.989893823243649	neither	NA	NA
Aars	1	-0.232202348379192	0.16111499142317	-0.154218145233403	0.372842091875839	neither	NA	NA
Aars2	1	-0.200805093262776	0.281879505036116	-0.0367240817037032	0.861023462179657	neither	NA	NA
Aatk	1	-0.17945652053159	0.311782177987456	-0.0360330021797341	0.876976262532563	neither	NA	NA
Abat	1	-0.178846500726798	0.186849340818537	-0.134857892781358	0.404662600420667	neither	NA	NA
Abca2	1	-0.019269101581	0.938812364867656	0.0634597188702159	0.749855639270957	neither	NA	NA
Abca3	1	-0.104299748613172	0.62275891414219	-0.0275495980190256	0.905715567191216	neither	NA	NA
Abca8a	1	0.042761202503392	0.840048535195657	0.0296639264487025	0.875894060872785	neither	NA	NA
Abcb9	1	0.0310391735156675	0.904879450841283	0.0315432409464793	0.886911735854474	neither	NA	NA
Abcc5	1	-0.0534681022431835	0.829855628480547	0.0730023040976345	0.707226015032884	neither	NA	NA
Abcc8	1	-0.0754894820835625	0.74388385348891	0.00795865737354256	0.973364886850838	neither	NA	NA
Abcf1	1	-0.0759473571341257	0.739285361748276	-0.0592984803056879	0.759863850744687	neither	NA	NA
Abcf3	1	0.024736632194597	0.924214479711047	0.0354345565094054	0.861462671815493	neither	NA	NA
Abcg1	1	-0.180544662013935	0.243315273648441	-0.0980120546633684	0.591101122643161	neither	NA	NA
Abhd16a	1	-0.0600839470024527	0.790215141914579	0.00385330781180143	0.988646864265742	neither	NA	NA
Abhd6	1	0.0380981962943708	0.868853455809068	-0.0518067215999298	0.808894790745321	neither	NA	NA
Abhd8	1	0.060576640543261	0.797115993002733	0.00856035176804958	0.973364886850838	neither	NA	NA
Abi1	1	0.122755098182302	0.520368330269417	0.0525903712524855	0.794641983736357	neither	NA	NA
Abtb1	1	0.00444149646509083	0.986998282052573	0.050291928976307	0.799415438579925	neither	NA	NA
Acaca	1	-0.279191217722081	0.100932463141459	-0.108549641840994	0.569997540061643	neither	NA	NA
Acad8	1	0.0431730282434046	0.866585442786378	0.0197886779583698	0.933383451134425	neither	NA	NA
Acad9	1	-0.046792305552279	0.852776097518261	0.0229320303257453	0.916690311962717	neither	NA	NA
Acadm	1	-0.419209024255149	0.00546898755861041	-0.202313869338302	0.223456391261923	FFI	NA	NA
Acadsb	1	-0.259954335428875	0.0737530747444992	-0.109988073202214	0.56294745098991	neither	NA	NA
Acadvl	1	0.0222783062118052	0.931773543392231	0.0661538818295992	0.721829946079868	neither	NA	NA
Acap3	1	-0.0361025549877026	0.887998988349618	0.0639458900815232	0.75095162579215	neither	NA	NA
Acat1	1	-0.0232749266491586	0.922608688642358	-0.00738513169114229	0.976713871158673	neither	NA	NA
Acat2	1	-0.0370782314723197	0.859697334507765	-0.0210418451003074	0.933383451134425	neither	NA	NA
Acin1	1	-0.105194497823483	0.611706532199746	-0.0320879651900216	0.885680869371868	neither	NA	NA
Acly	1	-0.129245527301348	0.513553969960963	-0.0436767064230195	0.836950698613992	neither	NA	NA
Aco2	1	-0.274536313306611	0.0953601255579924	-0.112549063959932	0.555735863498618	neither	NA	NA
Acot8	1	0.110486040857707	0.604891325848285	0.0463072890597767	0.802128113489335	neither	NA	NA
Acox1	1	-0.178532447262367	0.190107982209214	-0.0808065033596373	0.671589461138039	neither	NA	NA
Acox3	1	-0.173181785342971	0.312908768575685	-0.00829389172291601	0.974849636021341	neither	NA	NA
Acrbp	1	-0.107092020254995	0.608361151327994	0.0318458286183255	0.874943974324821	neither	NA	NA
Acsf3	1	-0.116822377145314	0.564135506587025	-0.0187510718206512	0.93655455583483	neither	NA	NA
Acsl5	1	0.0398368557344748	0.874540554983954	0.0943962341774309	0.576283882979433	neither	NA	NA
Acss2	1	-0.072189218886878	0.722764868595304	-0.00434662167454202	0.987992780049716	neither	NA	NA
Actl6a	1	0.0281743699855186	0.912076544674724	0.0702346029939454	0.621512577659639	neither	NA	NA
Actl6b	1	-0.0616788621578154	0.794245427785186	-0.0115438542663951	0.965690309999039	neither	NA	NA
Actr10	1	-0.0387876407418837	0.874409145852545	-0.00758052143260725	0.975442070128234	neither	NA	NA
Actr1a	1	-0.0172573486663724	0.943000491887482	0.0117242232158064	0.965690309999039	neither	NA	NA
Actr1b	1	-0.169778928883224	0.31822246027538	-0.0606141241563857	0.76430942351899	neither	NA	NA
Actr8	1	-0.105188334563491	0.590071741418953	-0.0778934496022395	0.687449221576542	neither	NA	NA
Acvr1b	1	-0.229551407187841	0.105512746936207	-0.115521573172922	0.542171381293941	neither	NA	NA
Acy1	1	0.0179183443044654	0.946587049856259	0.00101187804274779	0.996930894899463	neither	NA	NA
Acyp1	1	0.026895241834815	0.915948798343171	0.0132594354244374	0.958498231902142	neither	NA	NA
Adam11	1	-0.183214065000363	0.297820356637565	-0.0260236889230946	0.91466557633477	neither	NA	NA
Adarb1	1	-0.278164932967879	0.0369222874056442	-0.130970329298443	0.434461705822792	FFI	NA	NA
Adck1	1	-0.00826299540391164	0.976106247341452	0.0233863331990749	0.924478489834662	neither	NA	NA
Adck2	1	-0.0325879112867433	0.90045236999291	0.0369361072567221	0.854378995487895	neither	NA	NA
Adck5	1	0.0403236981413282	0.87099026309232	0.111711566881312	0.481195485886439	neither	NA	NA
Adcy1	1	-0.511626437876588	5.94380473765028e-4	-0.280786826341364	0.0630127059689716	FFI	NA	NA
Adcy2	1	0.00770037567099199	0.97704583309818	-0.00651890305422103	0.980532290103812	neither	NA	NA
Adcy3	1	-0.242777905535567	0.134636186336004	-0.0840678012223054	0.673935184601575	neither	NA	NA
Adcy5	1	-0.165928818288438	0.329503666788209	-0.0391513968596568	0.861462671815493	neither	NA	NA
Adcy6	1	-0.311079539843179	0.0614516841120296	-0.124940828424875	0.488201922261744	neither	NA	NA
Adcyap1r1	1	-0.0419222800327815	0.830621044975427	8.60858166937484e-4	0.997495465883106	neither	NA	NA
Add1	1	-0.0562333535525135	0.812011858331873	0.00188405897132166	0.994563348001047	neither	NA	NA
Add2	1	-0.285477034716703	0.0654542824006932	-0.0911080368211475	0.64613857619975	neither	NA	NA
Adgrb1	1	-0.0419054484047665	0.87015119079453	4.54850110638921e-4	0.999106253008769	neither	NA	NA
Adgrb2	1	0.0215772865936535	0.934708224237381	0.107991046291469	0.548788649242209	neither	NA	NA
Adgrb3	1	-0.24913772922589	0.123651383343326	-0.0935168828141189	0.638600351779582	neither	NA	NA
Adgrl1	1	-0.372178384563166	0.00559388075863034	-0.197177610259847	0.190969319908405	FFI	NA	NA
Adgrl2	1	-0.16964009972163	0.34998777378539	-0.0581907267513374	0.770730605024606	neither	NA	NA
Adgrl3	1	-0.328598220244619	0.042793809486171	-0.215018613669754	0.132735540664721	FFI	NA	NA
Adh5	1	0.0313105734528724	0.889340150520986	0.0266816889658238	0.912226967069883	neither	NA	NA
Adora1	1	0.0483431543824806	0.845684818818473	0.0553354585820953	0.784582123808211	neither	NA	NA
Adprh	1	-0.0583901937872195	0.790020643231778	0.0445010016017786	0.833649937423781	neither	NA	NA
Adprhl2	1	0.0848917975669749	0.689568312148865	0.0818984016324339	0.683242069087365	neither	NA	NA
Adrm1	1	-0.0865970685477159	0.685250204634311	-0.0578310926811362	0.779453061129697	neither	NA	NA
Adsl	1	-0.0578751105039475	0.787190459841058	0.0293889428976198	0.900765179801279	neither	NA	NA
Afdn	1	-0.00655094196658178	0.980629461682785	0.0280237470174991	0.889137725936033	neither	NA	NA
Afg3l1	1	-0.164002996211746	0.377982928019358	-0.106331726041786	0.581245891634523	neither	NA	NA
Afg3l2	1	-0.265121522042085	0.0867618530064358	-0.143337444317927	0.410278294308479	neither	NA	NA
Agap1	1	-0.330175926642142	0.0200853971430492	-0.129627619915735	0.456819533183128	FFI	NA	NA
Agap2	1	-0.308886934208238	0.0481492731993138	-0.10204476430706	0.593484386293421	FFI	NA	NA
Agap3	1	0.041543195326956	0.869354247121853	0.0408880610625849	0.851460301096287	neither	NA	NA
Agbl4	1	-0.158710614002708	0.39159057045815	-0.0510107214241955	0.767759409921229	neither	NA	NA
Agbl5	1	-0.00322254333222438	0.989037501552791	6.41124464667597e-4	0.997298823698788	neither	NA	NA
Agk	1	-0.239770664518238	0.112560804341771	-0.144780191456878	0.405903986780936	neither	NA	NA
Ago1	1	-0.272976071507422	0.0407275308835141	-0.129164378814746	0.44617107782458	FFI	NA	NA
Agpat3	1	-0.103805603527116	0.524822649050703	-0.0123631968427893	0.963611004643298	neither	NA	NA
Agrn	1	-0.0570705598481876	0.80031157549798	0.0198606293567576	0.93395421179729	neither	NA	NA
Agtpbp1	1	-0.376082581474414	0.012556599778273	-8.71703514770709e-4	0.997205919801495	FFI	NA	NA
Ahctf1	1	-0.433112896657494	0.00825504962122845	-0.121959353763321	0.497952862843791	FFI	NA	NA
Ahdc1	1	-0.478449110679725	0.00804676206737744	-0.193506433951456	0.239519605123639	FFI	NA	NA
Ahsa2	1	-0.148258729947851	0.447138953287042	-0.0984530668390987	0.599872897983153	neither	NA	NA
AI854703	1	-0.0381316124026303	0.873279960708951	0.0193097231898992	0.936633136619363	neither	NA	NA
Aifm1	1	-0.251611738449987	0.117470078971042	-0.0650500152651477	0.742880862555416	neither	NA	NA
Aifm3	1	-0.0984898115356648	0.650690412469674	0.049508425412514503	0.815287767434047	neither	NA	NA
Ajm1	1	-0.220446196742424	0.211884136875014	-0.0297895575017965	0.898994958083652	neither	NA	NA
Ak5	1	-0.0544583983226694	0.780797046719579	0.031849421241878	0.89277578212421	neither	NA	NA
Akap11	1	-0.374382529527453	0.0224233576233722	-0.04456267081753	0.835499216110483	FFI	NA	NA
Akap12	1	-0.476190422213111	0.00159823464743703	-0.194956807143104	0.232506174522683	FFI	NA	NA
Akap6	1	-0.403652084974966	0.0174692664065846	-0.120051796395049	0.510099996811648	FFI	NA	NA
Akap8l	1	-0.142539612932959	0.480208637832706	0.0255056717315577	0.887681440972992	neither	NA	NA
Akap9	1	-0.101839517017053	0.639246493432671	-0.0174463413992359	0.942336727496569	neither	NA	NA
Akr1b10	1	-0.095468568581032	0.632842705152929	-0.00877944085872814	0.973364886850838	neither	NA	NA
Akr1b3	1	0.00204904139224662	0.992826131132345	0.0267299438792521	0.909387613268982	neither	NA	NA
Akr1c18	1	-0.0755300621042761	0.74169641238664	-0.049841243845375	0.802128113489335	neither	NA	NA
Akr1e1	1	-0.103505254610076	0.62503228930358	-0.0533469094188263	0.78657672228862	neither	NA	NA
Akt1	1	-0.0092105994233571	0.972524239467273	-0.00739321861692873	0.977973686700286	neither	NA	NA
Akt2	1	0.00369554290209446	0.988564442195029	0.00858280068053821	0.973778848557775	neither	NA	NA
Alas1	1	-0.334905768989465	0.041833376993921	-0.149741928653641	0.396070856004454	FFI	NA	NA
Aldh18a1	1	-0.130405668176391	0.52570081821397	-0.0399769856888032	0.830199267640953	neither	NA	NA
Aldh2	1	-2.55442322041888e-4	0.999103612213923	0.0100332079229377	0.970515426787394	neither	NA	NA
Aldh3a2	1	-0.153453916533552	0.374985417357447	-0.0362538384241335	0.875503716543861	neither	NA	NA
Aldh7a1	1	-0.391262285869936	0.0156674122765884	-0.452573951490311	0.00518897180786078	both	NA	NA
Aldh9a1	1	-0.18924861685114	0.198712328425179	-0.0993489013315386	0.606348018245595	neither	NA	NA
Alg1	1	-0.0287330578175043	0.905144128114302	0.0141499597702676	0.955779940903803	neither	NA	NA
Alg2	1	0.00444829509553591	0.983860728344459	-0.0245291825828016	0.919369331684758	neither	NA	NA
Alkbh3	1	0.052604259360542	0.832532637867296	0.0892861738732998	0.625310953884472	neither	NA	NA
Als2	1	-0.379824426577279	0.0111491377694638	-0.160835455353034	0.352429521085829	FFI	NA	NA
Amacr	1	-0.182356719026243	0.340191646140323	-0.00985590648032026	0.966448127145293	neither	NA	NA
Ambra1	1	-0.295487317565419	0.0935384487462846	-0.0882066979452404	0.646782558931297	neither	NA	NA
Amigo1	1	0.0103199120131641	0.965667682989931	0.0196698019965818	0.93590880782397	neither	NA	NA
Amotl1	1	-0.259542238096343	0.137431439958326	-0.0786189958772131	0.687903797660843	neither	NA	NA
Ampd2	1	-0.0136587504293876	0.957698564564756	0.109519157090069	0.524777484505602	neither	NA	NA
Anapc1	1	-0.0608108438305716	0.794189763432219	0.00600170873146534	0.977992453562388	neither	NA	NA
Anapc2	1	-0.0349737226311853	0.888111718091387	0.0169641411189448	0.946377563221771	neither	NA	NA
Anapc4	1	-0.0337799001667278	0.892430268343147	0.0881588880165972	0.652562320632091	neither	NA	NA
Anapc7	1	-0.0289605378252254	0.911220006948278	0.0149125133926307	0.948803067308795	neither	NA	NA
Angel2	1	-0.166829699365152	0.359584646693318	-0.0628609793375933	0.752850046677079	neither	NA	NA
Ank1	1	-0.357551820731187	0.04177774612433	-0.0656186994286833	0.722554384480124	FFI	NA	NA
Ank3	1	-0.203584831059106	0.262651776080985	-0.0629397059222457	0.744503080845932	neither	NA	NA
Ankrd11	1	-0.194321624071849	0.219041827143573	-0.163044742854412	0.297641397649848	neither	NA	NA
Ankrd13b	1	-0.130302302982505	0.494990077176156	-0.00748568471228319	0.977512974914737	neither	NA	NA
Ankrd13d	1	0.076254234952651	0.739894972969266	0.0785098812475091	0.667402166951239	neither	NA	NA
Ankrd24	1	-0.318556042246642	0.0500456090876555	-0.109968206065443	0.558837959812943	neither	NA	NA
Ankrd35	1	-0.359717935116112	0.0254323804385716	-0.146115015906892	0.411161333248801	FFI	NA	NA
Ankrd50	1	-0.277659240568375	0.0799654042653161	-0.156056858987582	0.375924634101845	neither	NA	NA
Ankrd52	1	-0.492561043136454	0.0045933753768109	-0.215855654612685	0.183849507160098	FFI	NA	NA
Anks1	1	-0.217089394131772	0.233486648191931	-0.114148007639582	0.540873229507785	neither	NA	NA
Anks1b	1	-0.0610718496534733	0.781292796927139	-0.0428372717473704	0.844065905458109	neither	NA	NA
Anks3	1	-0.11066124070918	0.604279307996499	-0.0259573344279705	0.908722397971307	neither	NA	NA
Ano10	1	0.126146691258063	0.530568287553152	0.093768558666232	0.625458699427449	neither	NA	NA
Ano8	1	-0.187864953574465	0.320697291076663	-0.0886757397887288	0.654252353020353	neither	NA	NA
Anp32b	1	-0.0335231322718172	0.883364363792068	-0.0201431118300071	0.934831042114941	neither	NA	NA
Anxa6	1	-0.132086955725788	0.505308491615592	-0.0343393137552895	0.876059695827708	neither	NA	NA
Anxa7	1	0.0235165861593754	0.906465296989993	0.047140942665506	0.826590240562446	neither	NA	NA
Ap1b1	1	-0.022268658897416	0.93092898701726	0.0382698384195033	0.862684255532205	neither	NA	NA
Ap1m1	1	-0.132365652576074	0.477289015885138	-0.00330743353670138	0.990446714638195	neither	NA	NA
Ap2a1	1	-0.0808268056146389	0.722427161693048	-0.0132140743174971	0.955645815288401	neither	NA	NA
Ap2a2	1	-0.0891293778744333	0.671048074303386	-0.0320718846727756	0.890369932005754	neither	NA	NA
Ap2b1	1	0.0861996310560522	0.653988971838227	0.0352238110872317	0.880407003050411	neither	NA	NA
Ap2m1	1	-0.041414963052357	0.868123276960066	-0.0267795241107022	0.910882888814573	neither	NA	NA
Ap3b1	1	0.00561867284461235	0.983919534173094	0.00754775473274121	0.976508795984622	neither	NA	NA
Ap3b2	1	-0.107190155491122	0.612793656540193	-0.0373118827852357	0.867343528855321	neither	NA	NA
Ap3d1	1	-0.198636619017513	0.281879505036116	-0.0266116261244454	0.905121966823196	neither	NA	NA
Ap3m2	1	-0.0994766662544565	0.617556167285135	-0.030070989142568	0.899273372592282	neither	NA	NA
Ap3s2	1	-0.174876055499059	0.18637626829546	-0.0415274446484083	0.851460301096287	neither	NA	NA
Ap4m1	1	-0.280071642862249	0.0860058331280074	-0.102613482856345	0.593484386293421	neither	NA	NA
Ap5s1	1	0.0706186578594058	0.763156598170827	0.0335884818904179	0.866928270759534	neither	NA	NA
Apba1	1	-0.334054594244778	0.00588138295134357	-0.0615503338433001	0.754428467997561	FFI	NA	NA
Apba2	1	-0.156660744364072	0.409115785453094	-0.0210100732899941	0.933155734290414	neither	NA	NA
Apbb1	1	0.0101430937886534	0.97021809080208	0.0176243119944726	0.943178737196478	neither	NA	NA
Apbb3	1	-0.098796076455897	0.652214169577933	-0.162864470115293	0.328911145168658	neither	NA	NA
Apc2	1	-0.469234492165504	0.00810585820435473	-0.22202807506339	0.168413617710349	FFI	NA	NA
Apeh	1	-0.43042635353015	0.00781203811241897	-0.0165804731938336	0.935904923888994	FFI	NA	NA
Apip	1	0.0640833091786692	0.788354622885035	0.0563301753176721	0.775558387544544	neither	NA	NA
Arc	1	-0.427942431275419	0.0164246251928026	-0.950309041363756	1.605280367481e-4	both	NA	NA
Arel1	1	-0.255574496545227	0.0301388671699514	-0.102157363372268	0.590597232939173	FFI	NA	0.005478908136176386
Arf2	1	0.0526812963168032	0.765919767473726	-0.0147016138457486	0.955080429957938	neither	NA	NA
Arf3	1	-0.00268146027359008	0.989344172570219	0.0668919964243846	0.729002735427301	neither	NA	NA
Arfgap1	1	0.0596378914443853	0.804985508283228	0.0280105001220183	0.899273372592282	neither	NA	NA
Arfgap2	1	0.00690245018313481	0.979113057884162	0.0129970111974673	0.960785033388585	neither	NA	NA
Arfip2	1	0.101009707760119	0.586172658334912	0.0763141907536233	0.702669555097647	neither	NA	NA
Arhgap1	1	-0.0284180664363356	0.890038770774256	-0.0192305960456601	0.937413062161282	neither	NA	NA
Arhgap21	1	0.0319738118373492	0.901617771192545	0.0258638121781598	0.910425920689471	neither	NA	NA
Arhgap23	1	0.0535801010088981	0.820463964321142	0.0475428265640365	0.824518192653055	neither	NA	NA
Arhgap26	1	-0.257113186202085	0.0534503766404182	-0.0804670337256396	0.686559329313683	neither	NA	NA
Arhgap32	1	-0.442155180265191	6.12455294775051e-4	-0.142287699608066	0.402559490694313	FFI	NA	0.007721440429923016
Arhgap33	1	-0.145103642954089	0.472045149270435	-0.0460836629020844	0.815287767434047	neither	NA	NA
Arhgap35	1	-0.308125227843437	0.0301388671699514	-0.11643850388514	0.518281297471493	FFI	NA	NA
Arhgap39	1	-0.19073078215006	0.291849945834479	-0.138794538694327	0.422049861142037	neither	NA	NA
Arhgap44	1	-0.245213216976161	0.0302689002985985	-0.025587901989907	0.913697322583026	FFI	NA	NA
Arhgef1	1	0.0776552108861763	0.729468671239674	0.0861525169450708	0.577761427548834	neither	NA	NA
Arhgef10l	1	-0.256854276527034	0.108015335218703	-0.0333054419400065	0.883225183996916	neither	NA	NA
Arhgef11	1	-0.0678117712345497	0.763156598170827	0.0278723085842551	0.905936478126326	neither	NA	NA
Arhgef17	1	-0.265570287877097	0.117664938939975	-0.0481089212389506	0.822490857775168	neither	NA	NA
Arhgef2	1	-0.0476989900875114	0.849161966167015	0.0746452319605953	0.700893947653365	neither	NA	NA
Arhgef25	1	0.0231782360564644	0.92517575286041	0.101961901540865	0.596182539222813	neither	NA	NA
Arhgef28	1	-0.309529861078477	0.0686506181121124	-0.114322253896124	0.531213121551354	neither	NA	NA
Arhgef3	1	-0.1176549146735	0.52422694003692	-0.0268017251041314	0.911970645055308	neither	NA	NA
Arhgef4	1	0.0229612202233597	0.920725171557234	0.0651335982674932	0.748486015145617	neither	NA	NA
Arhgef40	1	0.0789264616321106	0.724917224143352	0.0487869760724999	0.801165908585839	neither	NA	NA
Arih2	1	-0.141448195479379	0.401067336550699	0.0223212781523764	0.928501519135693	neither	NA	NA
Arl16	1	0.0355751256282314	0.887014602838772	0.0578275947994912	0.774803341385064	neither	NA	NA
Arl4d	1	-0.153690442614252	0.438439293356242	-0.152435286706735	0.375924634101845	neither	NA	NA
Armc6	1	0.10880954550209	0.610104216630012	0.130969426716809	0.429992817715272	neither	NA	NA
Armc9	1	-0.0370176437664866	0.887020377053822	0.0682710304006058	0.716307819873293	neither	NA	NA
Armcx4	1	-0.932338674035255	2.82895494884692e-8	-0.68019699092216	7.46971239550773e-5	both	NA	NA
Arnt2	1	-0.254633638473167	0.0498960893618763	-0.137932271185045	0.427696291552851	FFI	NA	NA
Arpc1a	1	0.0289155620366042	0.900405447359156	0.0199835124492552	0.935199015065571	neither	NA	NA
Arrb1	1	-0.177934992459246	0.296881418568109	-0.0634903914461537	0.752802601198516	neither	NA	NA
Arsa	1	-0.167487215009488	0.342401019927043	-0.0944683172231073	0.632607689977419	neither	NA	NA
As3mt	1	-0.0785573191962889	0.719867128894866	-0.0601754093026551	0.7673087570268	neither	NA	NA
Asap1	1	-0.104421315909482	0.591401714055493	-0.034831087294766	0.88121727349591	neither	NA	NA
Asb8	1	-0.114649058001511	0.493998409353292	-0.038939156712985	0.852358292187155	neither	NA	NA
Ascc3	1	-0.204621878206399	0.271587547284569	-0.109059877686763	0.494666566272263	neither	NA	NA
Ash1l	1	-0.509382445285062	5.83313926714417e-4	-0.362087008828438	0.0118132022741654	both	NA	0.007501743641773735
Asic1	1	-0.0173654920695454	0.946298841009752	0.0213928630393416	0.933155734290414	neither	NA	NA
Asic2	1	-0.0705603850047249	0.661985162437258	-0.0332631548530029	0.880125031411856	neither	NA	NA
Asl	1	-0.0114464760649483	0.966249312455937	0.0451332164461991	0.815932476270994	neither	NA	NA
Asns	1	-0.178505878693797	0.334329553208628	0.00867791511893656	0.973108961103688	neither	NA	NA
Asphd1	1	-0.0571417575194051	0.808440165060744	-0.00562031131284053	0.982705997203984	neither	NA	NA
Astn2	1	-0.203340895862113	0.264702748580961	-0.109835195141301	0.563225925132739	neither	NA	NA
Atcay	1	-0.00217716603194948	0.992192448308376	-0.0117864985393676	0.96562811472674	neither	NA	NA
Atf6	1	-0.192995733928177	0.247687344589831	-0.0645549137280569	0.750091557877972	neither	NA	NA
Atf6b	1	0.107467468690354	0.61795173438037	0.0363283843963787	0.858180473514111	neither	NA	NA
Atg101	1	-0.151170354551485	0.412650861037502	-0.0167720068321604	0.946637391000105	neither	NA	NA
Atg13	1	-0.223917277741783	0.149501942722121	-0.0914108554002948	0.645605904214295	neither	NA	NA
Atg16l1	1	-0.119327508122185	0.530823452606102	0.0338430563067467	0.861462671815493	neither	NA	NA
Atg2a	1	-0.11094821928369	0.602276073265169	0.0376461416133769	0.831082758959874	neither	NA	NA
Atg2b	1	-0.228859739608086	0.190886106801004	-0.149072402602838	0.356896273771368	neither	NA	NA
Atg4b	1	-0.144368294096518	0.409115785453094	-0.026847283327569	0.91165092199583	neither	NA	NA
Atg7	1	0.0101774881221352	0.97021809080208	0.0352419992815518	0.861462671815493	neither	NA	NA
Atg9a	1	-0.0602688258070298	0.796513768274768	-0.0197287080068483	0.934818088040816	neither	NA	NA
Atic	1	-0.171456189826131	0.373820755357355	-0.0846740483471674	0.671404649922867	neither	NA	NA
Atl1	1	-0.542445946686075	0.0011928279848617	-0.268490130779722	0.0926019629363558	FFI	NA	NA
Atmin	1	-0.0616949858736718	0.72590283138503	0.0147196654365748	0.955080429957938	neither	NA	NA
Atp11a	1	-0.201384125822064	0.267773710898256	-0.00803839594874861	0.974519450809784	neither	NA	NA
Atp13a1	1	-0.180995550793821	0.324924545987091	-0.0104662654196823	0.967537490684323	neither	NA	NA
Atp13a2	1	-0.160089025237851	0.380708145161913	-0.0286733013153863	0.903906156065511	neither	NA	NA
Atp1a1	1	-0.017394235778486	0.937757325244817	-0.0345532093278984	0.88121727349591	neither	NA	NA
Atp1a2	1	0.0559743057019312	0.820801906689815	0.0452463041815674	0.818167868796843	neither	NA	NA
Atp2b2	1	-0.241207828486624	0.0407275308835141	-0.0718059851111195	0.706040242490862	FFI	NA	0.004294027196469169
Atp2b3	1	-0.39149392458193	0.0141341321906151	-0.267972339905106	0.0913744841752697	FFI	NA	NA
Atp2b4	1	-0.219456695545856	0.0845880650821069	-0.0799963018048714	0.689171321890613	neither	NA	NA
Atp6v0a1	1	-0.0932507373102222	0.654936290512079	-0.0292570411944964	0.900602334747808	neither	NA	NA
Atp6v0d1	1	0.0221766808953514	0.927781209321929	0.0526786054806676	0.80395558256553	neither	NA	NA
Atp6v1b2	1	-0.136649959145381	0.372165590031379	-0.0760860916247883	0.685862351632099	neither	NA	NA
Atp8a2	1	-0.326952637028096	0.0328566824622871	-0.138064943196781	0.437308369285191	FFI	NA	NA
Atp8b2	1	-0.259080777708391	0.109419480781447	-0.0371166638172445	0.872472473104073	neither	NA	NA
Atp9a	1	-0.047358603480752	0.849161966167015	0.00801108560045013	0.974467169242663	neither	NA	NA
Atp9b	1	-0.215044613646716	0.234281880010114	0.0308377702094545	0.880929592171466	neither	NA	NA
Atrn	1	-0.212970339912318	0.205363892381992	-0.0903739413479655	0.642871389081958	neither	NA	NA
Atxn10	1	-0.00607531335791897	0.981357238535846	0.0233923264539516	0.926274590792742	neither	NA	NA
Atxn2l	1	0.0152220840092441	0.954776931415901	0.0140532864935849	0.954056579781999	neither	NA	NA
Atxn7l3	1	-0.0384722144588107	0.873746368352484	0.0140983789999519	0.956639785318404	neither	NA	NA
AU040320	1	-0.226946082962704	0.197844212384502	-0.0917107680941644	0.626556389911601	neither	NA	NA
Auts2	1	-0.281667733241162	0.0857369643255963	-0.121961525542975	0.510099996811648	neither	NA	NA
Axin1	1	0.0724165668694177	0.754910714844901	0.0312994113202483	0.888559620099991	neither	NA	NA
Azin2	1	-0.196020977875115	0.240811894898814	-0.0563954483826159	0.784191612967496	neither	NA	NA
B3gat1	1	-0.0694673965191911	0.726820889005629	0.0254555851481012	0.916690311962717	neither	NA	NA
B4galnt1	1	0.0993871048126849	0.646165458241182	0.0545806143117542	0.782371222143171	neither	NA	NA
B4galnt4	1	-0.00543899536472017	0.984406129616355	0.0109508451340489	0.966448127145293	neither	NA	NA
B4galt2	1	0.12209965909559	0.541476834447496	0.0758558092322763	0.692806534651185	neither	NA	NA
B4galt3	1	-0.0353818556561482	0.889214988170958	-0.0305017811426387	0.894181347100066	neither	NA	NA
B4galt5	1	-0.174431466352416	0.232647489623483	-0.0798752904996552	0.687903797660843	neither	NA	NA
Babam2	1	-0.0291154021930215	0.907397215510021	0.02978216567097	0.897129176157487	neither	NA	NA
Bace1	1	-0.0978973970197711	0.549813370345145	-0.0695835080701774	0.721829946079868	neither	NA	NA
Bad	1	0.130074741105071	0.51122977939004	0.0923033237384259	0.635230771917036	neither	NA	NA
Bag1	1	0.160012534895703	0.415760061913898	0.107325094078448	0.545208925765648	neither	NA	NA
Bag3	1	-0.150904758097256	0.449248862524625	-0.0574982917288483	0.768700259528032	neither	NA	NA
Bag6	1	-0.0092983230079561	0.97387027389653	-0.0250164203341422	0.91466557633477	neither	NA	NA
Bahcc1	1	-0.169983549761866	0.380708145161913	-0.00135076735044033	0.995312820521543	neither	NA	NA
Baiap3	1	-0.238727298029299	0.189694090532166	-0.0789856814611332	0.687903797660843	neither	NA	NA
Bap1	1	-0.0528005422392544	0.827959009708157	-0.0177279812357364	0.943749362872993	neither	NA	NA
Baz1b	1	-0.199586707060966	0.279760364537873	-0.0257207444885028	0.912226967069883	neither	NA	NA
Baz2b	1	-0.203040571752084	0.275133221771473	-0.0136419433297064	0.955110315965489	neither	NA	NA
Bbs2	1	-0.136815755234043	0.502447827302448	-0.0457208846158032	0.809267439454413	neither	NA	NA
Bbs4	1	-0.107934553750553	0.483182295656477	-0.0980342480892364	0.596550903543086	neither	NA	NA
Bbs7	1	-0.373225118194289	0.0307739880756679	-0.101434934700671	0.565055655567318	FFI	NA	NA
Bbs9	1	-0.34025178459824	0.0349773689949272	-0.129693560897718	0.469943501499709	FFI	NA	NA
BC005624	1	0.019543152586269	0.93866262883032	0.00717866827261512	0.97915880946161	neither	NA	NA
Bcan	1	0.0448019708452714	0.84990368439192	0.0630228194802019	0.752802601198516	neither	NA	NA
Bcas3	1	-0.18670643699564	0.314961045602967	-0.0275213580605001	0.903906156065511	neither	NA	NA
Bcat1	1	-0.0732272871929547	0.732659194797289	-0.012635742126393	0.962592939197351	neither	NA	NA
Bckdha	1	-0.0415855465494614	0.870401867724974	-0.00647140096390891	0.980532290103812	neither	NA	NA
Bckdk	1	0.0331719098217463	0.899407552683136	0.0263704435606765	0.907699646456068	neither	NA	NA
Bcl2l2	1	0.151086999007336	0.446075914782489	0.102080244330073	0.574445885574571	neither	NA	NA
Bcl7a	1	0.00334350342972758	0.988564442195029	-0.0291555342827659	0.901536546002552	neither	NA	NA
Bclaf1	1	-0.167908277776224	0.368330662850129	-0.140560270764921	0.419487872416335	neither	NA	NA
Bcr	1	-0.109097462236011	0.609262890872702	0.0137446787065531	0.954277157025654	neither	NA	NA
Bdh1	1	-0.150300348081391	0.449248862524625	-0.0510851147658712	0.805630045542641	neither	NA	NA
Becn1	1	-0.0268710178860495	0.904511295213055	0.0382933119890573	0.865081724772804	neither	NA	NA
Begain	1	0.0403661978810895	0.874409145852545	0.0470439121674862	0.822441076215146	neither	NA	NA
Bicd2	1	-0.16043716798689	0.322806234497482	-0.0688272529517703	0.724869935721505	neither	NA	NA
Bicdl1	1	-0.161033835659273	0.412172267415383	-0.0483639525392854	0.802022690420871	neither	NA	NA
Bin1	1	0.110629809470724	0.554084499232176	0.110881424687044	0.559620507981966	neither	NA	NA
Blmh	1	0.0132663539660148	0.958828683228999	0.0228966659331489	0.926904576859965	neither	NA	NA
Blvra	1	0.0401106710005751	0.874540554983954	0.0521572795622157	0.799802981199514	neither	NA	NA
Bmp1	1	0.0608464133768923	0.793739993956081	0.0861477496924163	0.548788649242209	neither	NA	NA
Bms1	1	-0.316288138286877	0.063240879579931	-0.194661250480429	0.234189685602118	neither	NA	NA
Bop1	1	-0.0859234731109695	0.694004604616179	-6.33430865621638e-4	0.998281203360934	neither	NA	NA
Bpgm	1	0.169135546774747	0.320697291076663	0.126458974709928	0.485104694609893	neither	NA	NA
Bptf	1	-0.265960332394017	0.128011966145721	-0.0919623322927993	0.638506130378167	neither	NA	NA
Brap	1	-0.0537449795138182	0.780426492152876	-0.0116394066171339	0.965919910085	neither	NA	NA
Brd1	1	-0.216114151138112	0.204905408465892	-0.105196453769781	0.569997540061643	neither	NA	NA
Brd2	1	-0.0448571133643975	0.849561163839406	-0.0103033926772275	0.970515426787394	neither	NA	NA
Brd3os	1	0.0177826616793881	0.93866262883032	-0.00311430233045645	0.991220333621846	neither	NA	NA
Brd4	1	-0.0903064387418212	0.641118176217462	-0.0962645552250866	0.621512577659639	neither	NA	NA
Brd7	1	0.0574470968188543	0.815108156474425	0.0856656585802101	0.643646454356982	neither	NA	NA
Brd8	1	-0.235331287727619	0.131754928167504	-0.0515992094330811	0.809267439454413	neither	NA	NA
Brd9	1	-0.0396646119283323	0.866585442786378	0.00843213392252712	0.974012967002135	neither	NA	NA
Brf1	1	-0.102827314245768	0.621911772100085	0.0209337872680734	0.928501519135693	neither	NA	NA
Brinp1	1	-0.124169924993004	0.415307624481006	-0.029131055733443	0.900602334747808	neither	NA	NA
Brinp2	1	-0.11792587496741	0.541476834447496	-0.0381670558766833	0.86484122419378	neither	NA	NA
Brms1	1	0.0635223973206026	0.788261965268424	0.0675292156174857	0.709735990356971	neither	NA	NA
Brpf3	1	-0.239321981363735	0.125102015454086	-0.0481756632720916	0.822297678540447	neither	NA	NA
Brsk1	1	-0.0974516861071883	0.646165458241182	-0.0295533318065654	0.899273372592282	neither	NA	NA
Brsk2	1	-0.177753515182067	0.309916438079366	-0.0179623283201994	0.942542547211382	neither	NA	NA
Bsn	1	-0.128311334350521	0.515924974978077	-0.0469105401755325	0.82082200338611	neither	NA	NA
Btbd11	1	-0.128355163616484	0.477381108415116	-0.0717040998951163	0.716307819873293	neither	NA	NA
Btbd2	1	0.029512247349754	0.907397215510021	0.0217262506025202	0.928317105826487	neither	NA	NA
Btbd9	1	-0.150845847231925	0.438153616025593	-0.0139898591763007	0.956483680439141	neither	NA	NA
Btrc	1	-0.269823270460692	0.0932102591881081	-0.0727837160766118	0.713646264109118	neither	NA	NA
Bub3	1	-0.0708171749730364	0.724081768612319	0.011500356263692	0.966448127145293	neither	NA	NA
C030006K11Rik	1	-0.0100948757662588	0.971095293928345	0.00543388274948952	0.980532290103812	neither	NA	NA
C130074G19Rik	1	-0.317611853158795	0.0569399923409327	-0.19727001807217	0.215747416182754	neither	NA	NA
C2cd2l	1	0.0152155634492083	0.951234422374601	0.0430026653701057	0.83970159255235	neither	NA	NA
C2cd3	1	-0.158194045944974	0.409115785453094	-0.0906006502561567	0.648490874403844	neither	NA	NA
C2cd5	1	-0.298407358581992	0.0563875069647253	-0.0149351880686244	0.949384855794421	neither	NA	NA
Cabp7	1	-0.0952333247922416	0.664084413004789	0.00811139611284183	0.97454741690878	neither	NA	NA
Cacna1a	1	-0.345014407494595	0.0246364733933929	-0.192244196876957	0.234366528289018	FFI	NA	NA
Cacna1b	1	-0.217910265856326	0.229622345995942	-0.0130484319315597	0.948630667855328	neither	NA	NA
Cacna1e	1	-0.295707102318154	0.0736053155790218	-0.112862860740354	0.555735863498618	neither	NA	NA
Cacna1g	1	-0.335754211246596	0.0563875069647253	-0.0769826458916536	0.689577465695303	neither	NA	NA
Cacna1h	1	-0.11074084716428	0.59052092008734	-0.0783517466647047	0.692106574140184	neither	NA	NA
Cacna1i	1	-0.324692225203013	0.0358687686074986	-0.147745920881079	0.404145464807996	FFI	NA	NA
Cacna2d3	1	-0.074580334441681	0.740151337342566	-0.0611099744759104	0.758443003856816	neither	NA	NA
Cacnb3	1	0.105033094779586	0.618231717742064	0.0703866207085477	0.719463699131205	neither	NA	NA
Cacng2	1	0.00873749090609018	0.974297612424982	-0.037342117584339	0.870896858628049	neither	NA	NA
Cacng4	1	-0.00690355660627975	0.981116817558992	0.0288293256742773	0.894673869714549	neither	NA	NA
Cacng7	1	-0.0840281182694402	0.647797239649937	-0.0675259593069567	0.731609704402981	neither	NA	NA
Cactin	1	-0.130934032763528	0.513002661520017	-0.13081449863423	0.457718063173878	neither	NA	NA
Cadm4	1	-0.0372226342890372	0.873279960708951	-0.0473502724934017	0.825688612004151	neither	NA	NA
Cadps	1	-0.149475704942204	0.402241587371534	0.00785010093565141	0.975937484593268	neither	NA	NA
Cadps2	1	-0.217775663515419	0.23407325134496	-0.0146617956830881	0.955026969119558	neither	NA	NA
Calcoco1	1	-0.0442358813790027	0.861960012298167	-0.0153389468961742	0.948181843633952	neither	NA	NA
Caln1	1	-0.458133167876919	0.00419514896350685	-0.118525415042401	0.515424517976708	FFI	NA	NA
Camk1g	1	-0.116728389347456	0.548216034963004	-0.082952172423595	0.68103069728738	neither	NA	NA
Camk2a	1	-0.374927982134416	0.0168839512915983	-0.049200954869414	0.818167868796843	FFI	NA	NA
Camk2b	1	-0.122639258846116	0.508281994884902	0.0369328930978353	0.873097025315518	neither	NA	NA
Camk2g	1	-0.290441899685404	0.0368585788301333	-0.0158040258160511	0.951107279612291	FFI	NA	NA
Camk4	1	-0.0789778025452013	0.670478063376433	-0.037384896133789	0.871330287859647	neither	NA	NA
Camkk1	1	-0.154624678764287	0.345758057110413	0.00300933732187161	0.991415454759586	neither	NA	NA
Camkk2	1	-0.223767720343341	0.182168901201218	-0.0388016055095672	0.86321838102058	neither	NA	NA
Camkv	1	-0.0125722305156841	0.960805951930977	0.0613568854328466	0.760690372248874	neither	NA	NA
Camsap1	1	-0.213083503378118	0.250486908554101	-0.021951363384525	0.915696756734232	neither	NA	NA
Camsap3	1	-0.0737967664647605	0.749361523208559	0.0185760277954223	0.933383451134425	neither	NA	NA
Camta2	1	-0.158994774771715	0.415760061913898	-0.0332411291821109	0.880687814971615	neither	NA	NA
Cap1	1	0.0952696988257176	0.520123168461362	0.00551320532564654	0.983521251480349	neither	NA	NA
Capn1	1	-0.289802942598454	0.0563065891116504	-0.0506330893787376	0.808011577603498	neither	NA	NA
Capn15	1	-0.15520763231139	0.424367153220511	-0.0509936079803382	0.805288186603449	neither	NA	NA
Capn2	1	-0.119345360705527	0.478228077369295	-0.0139782272624511	0.956639785318404	neither	NA	NA
Capn5	1	-0.167919981130122	0.366608756661796	-0.0784218925789975	0.693256782906399	neither	NA	NA
Capzb	1	0.0652030029331067	0.742842606195106	0.0971135181259868	0.5959569441692	neither	NA	NA
Car11	1	0.0650510460792079	0.782952155906155	0.0195374574479071	0.935177458243957	neither	NA	NA
Car4	1	0.0369014648241119	0.88734782023283	0.0266164876256503	0.902664937135626	neither	NA	NA
Carmil3	1	-0.157767207610469	0.422225745061005	0.0354842364649536	0.854534788598277	neither	NA	NA
Cars	1	0.112020513367447	0.600276935834767	0.117414419860235	0.465110567782231	neither	NA	NA
Cask	1	-0.326243319735126	0.0404614526637304	-0.141866369920336	0.426718529304088	FFI	NA	NA
Caskin1	1	-0.240089012380779	0.179725914262778	-0.119611175747302	0.518281297471493	neither	NA	NA
Casp9	1	0.0228400498843146	0.930787153149256	0.0236883664593378	0.912226967069883	neither	NA	NA
Castor2	1	-0.240575280016955	0.181487651532366	-0.041664911885582	0.834146738398299	neither	NA	NA
Cat	1	-0.134169425991653	0.507862532237485	-0.0436039974957145	0.838345119317709	neither	NA	NA
Cbln1	1	-0.0976717002044873	0.65497451661569	0.0260295760066337	0.886455001306956	neither	NA	NA
Cbr1	1	-0.00993108011013266	0.970766531649761	0.0020103723534607	0.994073316146492	neither	NA	NA
Cbs	1	-0.0287551833646674	0.911672811147897	0.0811372983357146	0.5959569441692	neither	NA	NA
Cbx6	1	-0.0522548451376657	0.812011858331873	0.00699843416360336	0.979935836985956	neither	NA	NA
Cbx7	1	0.131592387892659	0.495023576348101	0.109113308287531	0.56927504868436	neither	NA	NA
Cc2d1a	1	0.0762727840137701	0.73944316855247	0.0753812998144186	0.698234492126869	neither	NA	NA
Ccar2	1	-0.201460726741796	0.260866656997503	-0.0795196415071029	0.689171321890613	neither	NA	NA
Ccdc106	1	-0.0958202500917413	0.655877202224889	-0.0415578061881095	0.835035590294488	neither	NA	NA
Ccdc149	1	-0.0412292403985563	0.87015119079453	0.00602569412453081	0.981116838294539	neither	NA	NA
Ccdc181	1	0.00254246199555352	0.991720250943855	0.0182588417261805	0.937578744021087	neither	NA	NA
Ccdc22	1	-0.0638604542029808	0.789008060257317	-0.0278746591470371	0.903583231840978	neither	NA	NA
Ccdc47	1	0.0641779001533346	0.751341443886627	0.111729113324916	0.556453676429893	neither	NA	NA
Ccdc85c	1	-0.190527955214456	0.205076700930973	-0.0825065976160792	0.682805176673992	neither	NA	NA
Ccdc9	1	-0.194445567037287	0.283157344918269	-0.0545965496030327	0.785110176001404	neither	NA	NA
Ccdc91	1	-0.0505720517048062	0.790215141914579	-0.055751585616076	0.759863850744687	neither	NA	NA
Ccdc92b	1	-0.010752339414915	0.962061833966122	0.0254626738096194	0.91681120838675	neither	NA	NA
Ccm2	1	0.118008336540635	0.527576412037071	0.0200081110155062	0.934955571778525	neither	NA	NA
Ccnd3	1	0.0674166823732056	0.772632349518981	0.0687526592109286	0.720638051480722	neither	NA	NA
Ccnh	1	-0.0135192149442486	0.953042207095514	0.0579018968151336	0.740797376318801	neither	NA	NA
Ccs	1	-0.0150139011197435	0.95366315050625	0.0983943142756564	0.61138302350632	neither	NA	NA
Cct2	1	-0.00793882445361286	0.972739136846542	0.00591727252199027	0.981199427070549	neither	NA	NA
Cct3	1	0.0824705099091299	0.693833816515456	0.0962370432560139	0.622681945761763	neither	NA	NA
Cct5	1	-0.0328166140833961	0.892193887598648	-0.00213288519298563	0.99391926535343	neither	NA	NA
Cct6a	1	0.0258202350575759	0.914789028703144	0.0187545993454026	0.93881370128921	neither	NA	NA
Cd2bp2	1	0.0479932975351244	0.841592961170209	0.0182540993670788	0.941737701274053	neither	NA	NA
Cd3eap	1	0.0657142549472359	0.781292796927139	0.00718075130255441	0.976713871158673	neither	NA	NA
Cdadc1	1	-0.0396438372757105	0.84990368439192	0.0426263711759421	0.844323723798944	neither	NA	NA
Cdc123	1	0.0496529992020309	0.840048535195657	0.0807907895183385	0.687717570993875	neither	NA	NA
Cdc16	1	-0.0631384229639146	0.745883479614223	0.0198034104140079	0.933383451134425	neither	NA	NA
Cdc23	1	-0.0213446602649733	0.934919061728495	0.0291126147750982	0.899273372592282	neither	NA	NA
Cdc42bpa	1	-0.701847015012345	5.43015110462925e-7	-0.329302741432381	0.0191016815803052	both	NA	NA
Cdc42bpb	1	0.0247943608319023	0.925175352055508	0.139234425445853	0.425195552727306	neither	NA	NA
Cdh22	1	-0.0281588154315138	0.912731659144026	0.0212370245826315	0.928501519135693	neither	NA	NA
Cdk10	1	0.0418078778305648	0.87007296356293	0.0866341840952971	0.652391777918237	neither	NA	NA
Cdk11b	1	-0.158453179712676	0.383611097558246	-0.0817310578304144	0.685862351632099	neither	NA	NA
Cdk16	1	0.0701509213829183	0.746025840541455	0.0711457401444623	0.719093779192116	neither	NA	NA
Cdk18	1	-0.267729456531173	0.129438148806291	-0.158111209363536	0.360271801791383	neither	NA	NA
Cdk5rap2	1	0.0983252538685205	0.653988971838227	0.0508858538486064	0.809267439454413	neither	NA	NA
Cdk9	1	0.0816710642934918	0.690231021165361	0.0947609432075986	0.629291016845905	neither	NA	NA
Cdkl1	1	-0.266454678365192	0.0924437877249213	-0.0764711287307001	0.671589461138039	neither	NA	NA
Cdo1	1	0.0480657296218649	0.826093825741126	-0.00396629743011904	0.988646864265742	neither	NA	NA
Cds1	1	0.0664986448224213	0.714783169858124	-0.00190714720764188	0.994560103672344	neither	NA	NA
Cds2	1	-0.14658148796681	0.426338940924887	-0.0917611035669729	0.64613857619975	neither	NA	NA
Cebpz	1	-0.184203841083079	0.294600728091614	-0.0400006340331217	0.852056993581413	neither	NA	NA
Celf3	1	-0.0301864474688724	0.895362042618397	-0.0123915137497399	0.962592939197351	neither	NA	NA
Celf4	1	-0.0622966336800849	0.767580487562775	-0.049423998344543	0.814295191612407	neither	NA	NA
Celf5	1	-0.122470815775555	0.505308491615592	-0.0603409797476075	0.76430942351899	neither	NA	NA
Celsr2	1	-0.215390138884229	0.240160286286381	-0.0365689823837512	0.863014905721918	neither	NA	NA
Cenpb	1	0.0177431715608295	0.94482165077081	0.00112278608444391	0.996900766144588	neither	NA	NA
Cep104	1	-0.215645027962423	0.228426892510384	-0.075084962327238	0.706040242490862	neither	NA	NA
Cep131	1	0.00472171732093119	0.985852135593681	0.0405768530933026	0.828302744264591	neither	NA	NA
Cep170b	1	-0.205615064382037	0.261422838875181	-0.0566428506801221	0.778360579686572	neither	NA	NA
Cep250	1	-0.320384191340284	0.0709428785340329	-0.0599676686268789	0.750871812557967	neither	NA	NA
Cep63	1	-0.0477976981982786	0.849161966167015	0.0478524775320322	0.799415438579925	neither	NA	NA
Cerk	1	-0.0821438490114018	0.670047534353553	0.00461335873722696	0.98757879542263	neither	NA	NA
Cfap20	1	0.111227048601685	0.577452551791295	0.0424532620565254	0.845146245811925	neither	NA	NA
Cfap298	1	0.0323165868612256	0.900405447359156	-0.0190036391380249	0.934053814584522	neither	NA	NA
Chadl	1	-0.00527348750969308	0.98478037066381	0.0108723521576488	0.96623867513785	neither	NA	NA
Chd2	1	-0.618271703868336	1.92439779745101e-4	-0.464029708145185	0.0045406676490405	both	NA	NA
Chd3	1	-0.273529459373434	0.123267530234848	-0.107763026978167	0.561874026328437	neither	NA	NA
Chd4	1	-0.566703877050016	2.62170901220571e-4	-0.265944907225796	0.0630127059689716	FFI	NA	NA
Chd5	1	-0.308654220728246	0.072259569884343	-0.177541122840604	0.298792646607288	neither	NA	NA
Chd6	1	-0.513479315198769	0.00107371285973124	-0.207028097434579	0.17577697318729	FFI	NA	NA
Chd8	1	-0.0894325357878241	0.682884927311075	0.0323495713881544	0.867380427392425	neither	NA	NA
Chmp3	1	0.10606104979286	0.575669330635329	0.0395565339567003	0.860359469014918	neither	NA	NA
Chmp7	1	0.136023171206722	0.472550587569955	0.0723312275751809	0.714685678557535	neither	NA	NA
Chpf2	1	-0.192753519048191	0.277073748984578	0.0434708620649399	0.83728132526636	neither	NA	NA
Chrm1	1	-0.0406200375466761	0.871207245518494	-0.0121405709445177	0.963919918779226	neither	NA	NA
Chrm3	1	-0.125842170989496	0.465161077382159	-0.136295022370133	0.428323427329491	neither	NA	NA
Chrm4	1	-0.208430415928567	0.262651776080985	-0.12828343608857	0.456819533183128	neither	NA	NA
Chrna4	1	-0.0648819450591585	0.769049305532601	-0.020524305325904	0.933383451134425	neither	NA	NA
Chrnb2	1	-0.0687010495569773	0.752796796096759	-0.0106078156758424	0.969047668582413	neither	NA	NA
Chst1	1	0.00821218199498188	0.969030909334099	0.0540326341677806	0.795191155992665	neither	NA	NA
Chst10	1	0.0230258061927095	0.905716347462875	-0.0394195986040219	0.860067813751793	neither	NA	NA
Chtf8	1	-0.35711851929461	0.0421561163715484	-0.631796634189301	1.24204661227427e-4	both	NA	NA
Ciao1	1	-0.120990892142117	0.561806323446666	-0.0493887733160742	0.805651898737763	neither	NA	NA
Ciao3	1	0.124649023383877	0.545470477038059	0.0495783069675883	0.799415438579925	neither	NA	NA
Cic	1	-0.0226754392495914	0.931773543392231	0.0123324724902434	0.960785033388585	neither	NA	NA
Cir1	1	-0.0899424296469269	0.636621768788121	-0.101245607635561	0.600830521723413	neither	NA	NA
Cirbp	1	0.0428379256690873	0.862835439026613	0.115511270850484	0.540873229507785	neither	NA	NA
Cit	1	-1.08474119357655	1.09839326249674e-12	-0.67293163015735	1.09195995344213e-5	both	NA	NA
Ciz1	1	0.0162383249301472	0.951216235662432	0.0750389172709285	0.689171321890613	neither	NA	NA
Ckap5	1	-0.232057405911565	0.113001910986477	-0.213045272597001	0.159814868903221	neither	NA	NA
Ckmt1	1	-0.0436650916674207	0.863367149024295	0.0374706471691231	0.86320145111925	neither	NA	NA
Clasp1	1	-0.309882820047818	0.0142724423688587	-0.144441168823667	0.409973158491247	FFI	NA	0.006067055047819418
Clasrp	1	0.0736810570833245	0.741709537303776	0.110625776490842	0.448098621775553	neither	NA	NA
Clcn2	1	-0.076755558358661	0.739285361748276	0.0235029709820685	0.917325420612325	neither	NA	NA
Clcn6	1	-0.143589269019739	0.343972763471672	-0.0476269001603206	0.824445526244726	neither	NA	NA
Clcn7	1	-0.157384350783514	0.366373313680873	-0.0627855573081598	0.75462998611954	neither	NA	NA
Clec16a	1	-0.201888715171583	0.244288722411981	-4.01483820003627e-4	0.999106253008769	neither	NA	NA
Clgn	1	-0.246188319843385	0.138895599501137	-0.0886331533740698	0.646377086375751	neither	NA	NA
Clip1	1	0.0738897330584489	0.745723559074673	0.214055984554385	0.18709441819834	neither	NA	NA
Clip2	1	-0.0764841858691135	0.729375008106197	0.0506031900982523	0.809267439454413	neither	NA	NA
Clk2	1	-0.113012149414912	0.594608114667517	0.00551673926473297	0.982596326656656	neither	NA	NA
Clk3	1	0.0644196261152963	0.772839229757996	0.018470427952816	0.93655455583483	neither	NA	NA
Clpb	1	-0.0776856259014518	0.732716217923246	-0.0659351364269079	0.731167500066853	neither	NA	NA
Clstn2	1	-0.209911064327479	0.115539963068524	-0.113647002731719	0.533244554249017	neither	NA	NA
Cluh	1	-0.226433081622233	0.185324600695539	-0.0267739396851962	0.91165092199583	neither	NA	NA
Cmas	1	-0.0266769823086764	0.894188844156954	-0.0152384064351272	0.951154641390782	neither	NA	NA
Cmip	1	-0.413088601756763	0.0111491377694638	-0.196689087044526	0.234366528289018	FFI	NA	NA
Cmtm4	1	-0.200511760021418	0.211344294661831	-0.0656301033946294	0.744503080845932	neither	NA	NA
Cmtr1	1	-0.288818320656377	0.102534859255361	-7.05200415365286e-4	0.997900696848615	neither	NA	NA
Cndp2	1	-0.057174262451465	0.788343490223152	0.016174472686275	0.949402011117464	neither	NA	NA
Cnnm1	1	-0.171461586394235	0.258733465575733	-0.0610361268411738	0.759863850744687	neither	NA	NA
Cnnm2	1	-0.304186090153286	0.0262911819792786	-0.0940598452234494	0.632607689977419	FFI	NA	NA
Cnot1	1	-0.229607202334735	0.198595473492687	-0.0354955367259194	0.863858003669722	neither	NA	NA
Cnot10	1	-0.130297652041582	0.508281994884902	-0.015933566189538	0.950359444209579	neither	NA	NA
Cnot8	1	0.00962374956673334	0.971039777777804	0.0229756768747756	0.926288249669575	neither	NA	NA
Cnppd1	1	-0.0685394983493609	0.763939227288238	0.0589476520825663	0.772991705634631	neither	NA	NA
Cntn2	1	-0.0394591839222691	0.860797568087461	0.00387771385645275	0.988646864265742	neither	NA	NA
Cntnap1	1	-0.318039339986012	0.0517373742005434	-0.168032304453318	0.331775703316978	neither	NA	NA
Cntrob	1	-0.0102456050516078	0.969256532021436	-0.02573361549828	0.903583231840978	neither	NA	NA
Coasy	1	-0.0887652050437559	0.689841882287561	-0.0208792438260324	0.926690774122005	neither	NA	NA
Cog1	1	-0.139190157864048	0.41455687095575	-0.00702748570743488	0.979761992470026	neither	NA	NA
Cog4	1	-0.0853808336847892	0.695479361081067	0.00333083949867369	0.990446714638195	neither	NA	NA
Cog7	1	-0.139878964493756	0.484744434514285	-0.0171082503200539	0.941460261326559	neither	NA	NA
Colgalt1	1	-0.0763667912688866	0.715923633068609	-0.0223784886139473	0.918460753925456	neither	NA	NA
Commd4	1	0.00925286639920687	0.97284891098016	-0.02905385037425	0.902952228826233	neither	NA	NA
Copa	1	-0.359973494289426	0.00374595940108769	-0.243738823162662	0.0434482442968352	both	NA	NA
Copb2	1	-0.383786552942833	0.00223043693631644	-0.275720399119013	0.0258811391484091	both	NA	NA
Copg1	1	-0.205200155824147	0.19047949844607	-0.0660943285920498	0.742880862555416	neither	NA	NA
Copg2	1	-0.349179607998756	0.0188534464401687	-0.114225522955959	0.551133603229373	FFI	NA	NA
Coq10a	1	0.0406861452010703	0.854364261208559	0.0696644563894593	0.726884485886312	neither	NA	NA
Coq4	1	0.0791664061168917	0.729106105173451	-0.0410109156181992	0.836180336627621	neither	NA	NA
Coq5	1	-0.04091372087831	0.862414274972508	-0.0098229306774989	0.97133623661152	neither	NA	NA
Coq6	1	-0.0226439489173854	0.931249089492956	0.00680359089224363	0.979935836985956	neither	NA	NA
Coq8a	1	-0.012081420062425	0.964885082046292	-0.0194903737535504	0.933383451134425	neither	NA	NA
Coro1a	1	-0.150274810552869	0.42963533014683	-0.0439014460872533	0.836142197143552	neither	NA	NA
Coro1b	1	-0.136980249947332	0.477381108415116	0.00211414120953268	0.99391926535343	neither	NA	NA
Coro1c	1	-0.131086007822948	0.445299777912174	-0.0119685040059677	0.965059545352594	neither	NA	NA
Coro2a	1	-0.229070162760307	0.124016862743982	0.0060231966903445	0.981199427070549	neither	NA	NA
Coro2b	1	-0.111286776689142	0.541184011942445	-0.040751891304197	0.854099561222613	neither	NA	NA
Coro6	1	-0.210498852479412	0.242768844509562	-0.0341706382563805	0.880407003050411	neither	NA	NA
Coro7	1	-0.246487064247611	0.170418368748338	-0.0724805686442123	0.708265029042832	neither	NA	NA
Cox18	1	0.0352327071815203	0.874540554983954	-0.0271216899084325	0.903583231840978	neither	NA	NA
Cplx2	1	-0.319737363947301	0.0332316907027262	-0.092690253206645	0.640968105339444	FFI	NA	NA
Cpne2	1	0.104168833382488	0.632083502318378	0.0931932018941191	0.637174964255699	neither	NA	NA
Cpne5	1	-0.19031191415431	0.287078695085833	-0.0893392620067487	0.649345398636094	neither	NA	NA
Cpne6	1	-0.14471772947351	0.459727076389433	-0.0515343813607012	0.809267439454413	neither	NA	NA
Cpne7	1	0.0415935543966578	0.873037629866768	0.0844548292414624	0.645532475443343	neither	NA	NA
Cpne9	1	-0.0906263673244135	0.68133898565963	0.0254944418618115	0.91026320442003406	neither	NA	NA
Cpsf1	1	0.0105548172737097	0.96988727114895	0.0514837559477025	0.742880862555416	neither	NA	NA
Cpsf2	1	-0.312070974619806	0.0215822095582437	-0.141181623483621	0.411161333248801	FFI	NA	NA
Cpsf3	1	-0.137350120786543	0.493612960650263	0.0213455347671251	0.92097275100295	neither	NA	NA
Cpsf7	1	-0.0995412861424064	0.595765388875959	-0.0231421558311522	0.926362986771012	neither	NA	NA
Cpt1c	1	-0.0144863063927953	0.956931869677436	6.62177288910239e-4	0.998186897862064	neither	NA	NA
Cpxm1	1	-0.140351205181066	0.489702101479362	-0.0126447988101904	0.934955571778525	neither	NA	NA
Cracdl	1	0.0412347959779154	0.873743300533351	0.10266801812322	0.591101122643161	neither	NA	NA
Crat	1	-0.0868859946468644	0.694070037713438	-0.0354807738303602	0.874070446324065	neither	NA	NA
Crcp	1	0.00193757566171909	0.993324288218158	0.0333089106580506	0.875894060872785	neither	NA	NA
Creb3	1	-0.0395016284280619	0.877329851113683	0.0875960004697611	0.648490874403844	neither	NA	NA
Crmp1	1	-0.142552681815545	0.430294719706456	-0.0467783647983633	0.828302744264591	neither	NA	NA
Crocc	1	-0.00521142900529522	0.983919534173094	-0.0441560435681042	0.824445526244726	neither	NA	NA
Crtc1	1	-0.19080245013013	0.254644158623886	-0.0661332576462283	0.742880862555416	neither	NA	NA
Cry2	1	-0.0584144247107061	0.783255056467924	0.0119194624492923	0.964515681176455	neither	NA	NA
Crym	1	-0.0597494193242548	0.795738228099223	-0.0212802519278721	0.932496848459093	neither	NA	NA
Cryzl1	1	0.0517819878655154	0.825042083619821	0.0414157564338741	0.851479781157118	neither	NA	NA
Cs	1	0.0331967650078647	0.866470194144562	0.00395663936842268	0.988623530417822	neither	NA	NA
Csad	1	0.0129138639656857	0.960638103224915	0.0021095412280435	0.99391926535343	neither	NA	NA
Csnk1d	1	-0.147521542612154	0.351613887330614	-0.0284814030881255	0.903219880740835	neither	NA	NA
Csnk1e	1	-0.0577117767416844	0.777742608486594	-0.0341582403690711	0.880407003050411	neither	NA	NA
Csnk1g2	1	-0.0112653563394567	0.965562741304552	0.0447951291882737	0.83099204927978	neither	NA	NA
Cstf1	1	-0.177161002008198	0.326186824248689	-0.0139549171683367	0.955626255083206	neither	NA	NA
Ctbp1	1	-0.00787586997262117	0.976074975769244	0.0221147816856474	0.930132351552356	neither	NA	NA
Ctbp2	1	-0.0571726320775594	0.807425158393171	0.0616576050135905	0.749139908245585	neither	NA	NA
Ctc1	1	-0.157582125584327	0.417982577086297	-0.0240947777198331	0.915284958496481	neither	NA	NA
Ctdp1	1	-0.111367251680539	0.595664931189182	0.0146130409064547	0.954902124601678	neither	NA	NA
Ctdsp2	1	0.047645587352422	0.843514099499612	0.0720835658473792	0.715504737539244	neither	NA	NA
Ctif	1	-0.239701284035329	0.0959670127432071	-0.0663374229376986	0.742880862555416	neither	NA	NA
Ctnnbl1	1	-0.00227243507116819	0.991720250943855	0.0843728081327846	0.672264498164658	neither	NA	NA
Ctnnd2	1	0.00932940267147019	0.970749667114063	0.0614568801388421	0.760690372248874	neither	NA	NA
Ctps	1	-0.153729016512717	0.373601504061185	-0.0844914148987453	0.667654493972282	neither	NA	NA
Ctps2	1	-0.117654468060521	0.537624371905795	-0.00527185179528311	0.98362179001474	neither	NA	NA
Ctr9	1	-0.23413074198265801	0.198595473492687	-0.0738699321863401	0.692106574140184	neither	NA	NA
Ctsf	1	0.0301007932420823	0.903950786500071	0.00803309497740184	0.97491841485092	neither	NA	NA
Ctu2	1	0.128402314204542	0.492472741459191	0.0528859401395801	0.719448096525546	neither	NA	NA
Cul1	1	0.0929604932001193	0.669115417635273	0.104968402933137	0.582885149931974	neither	NA	NA
Cul2	1	-0.286223565262523	0.102534859255361	-0.081918827629486	0.671003602305416	neither	NA	NA
Cul3	1	-0.1829731137057	0.222625038135359	-0.0304219351298575	0.899273372592282	neither	NA	NA
Cul7	1	-0.136841898018756	0.501207473104282	-0.0244238398306514	0.905131361447802	neither	NA	NA
Cul9	1	-0.327176069142445	0.0614048397533404	-0.084048619265634	0.651723123829696	neither	NA	NA
Cux1	1	0.136379759299744	0.477381108415116	0.0598040016696533	0.763197534627187	neither	NA	NA
Cux2	1	-0.305370344592439	0.0589282519491139	-0.0916573555326143	0.625458699427449	neither	NA	NA
Cxxc1	1	0.0324007933901506	0.900370503684834	0.0416645455135508	0.828000422197507	neither	NA	NA
Cyb5d1	1	-0.157801736289941	0.421113905658999	-0.135930483819497	0.428323427329491	neither	NA	NA
Cyb5r3	1	0.0243160973839755	0.919407099152246	0.0148198513954637	0.954902124601678	neither	NA	NA
Cyfip1	1	-0.211134476120272	0.147396548788663	-0.0965370110510763	0.624134312350271	neither	NA	NA
Cyfip2	1	-0.369433925076085	0.00389038740403895	-0.070681427849346	0.708265029042832	FFI	NA	NA
Cyhr1	1	0.128062866118545	0.487047956914313	0.0615071005471841	0.760690372248874	neither	NA	NA
Cyth1	1	0.06706434738074	0.752680637554949	0.1244083177621	0.500535166509589	neither	NA	NA
Cyth3	1	-0.182981564137936	0.307637167451623	-0.116938897504293	0.524777484505602	neither	NA	NA
D230025D16Rik	1	-0.0221202051568336	0.93092898701726	-0.00952130852296702	0.97133623661152	neither	NA	NA
D430019H16Rik	1	-0.157287314409518	0.355897840003532	-0.0806573437329596	0.676824570193677	neither	NA	NA
D430041D05Rik	1	-0.213182507114694	0.175610151341064	-0.0529273469963545	0.802128113489335	neither	NA	0.005192004278233401
D5Ertd579e	1	-0.315424851283558	0.0169109062040215	-0.212492389141471	0.0951597886368121	FFI	NA	NA
D6Wsu163e	1	-0.190914045179394	0.305915667644153	-0.0436032218200728	0.828302744264591	neither	NA	NA
Dact2	1	-0.115546643710752	0.575797117708468	-0.00911155528186863	0.971864304981805	neither	NA	NA
Dact3	1	0.0925334495293752	0.663030901821009	0.0376600012714117	0.862771943180341	neither	NA	NA
Dagla	1	-0.189118314681	0.283157344918269	-0.059078542267518	0.772991705634631	neither	NA	NA
Dalrd3	1	-0.04313607129031	0.857986943048117	-0.00373976959166792	0.988646864265742	neither	NA	NA
Dapk1	1	-0.256762258541125	0.108870250480364	-0.0963792393620244	0.610775608839926	neither	NA	NA
Dapk3	1	0.00593972587281351	0.983511188226689	0.0540832574100655	0.787425285902247	neither	NA	NA
Dars2	1	-0.0595502951760184	0.805709222281171	-0.014987748693686	0.947202531417931	neither	NA	NA
Dbt	1	-0.312102868638625	0.0509183599378673	-0.206688626728982	0.207176612496263	neither	NA	NA
Dcaf1	1	-0.223358980906631	0.224816275011089	-0.0577332066196792	0.747429639175536	neither	NA	NA
Dcaf11	1	-0.0641079826104934	0.77208220871011	0.0162185497680496	0.948673166242861	neither	NA	NA
Dcaf13	1	-0.177489985662165	0.302744362057422	-0.115520665070873	0.531213121551354	neither	NA	NA
Dcaf4	1	-0.111277355424452	0.588134781312796	0.00550385270267403	0.983074478419448	neither	NA	NA
Dcaf5	1	-0.478100209262665	1.90468623207436e-4	-0.247418616991004	0.072811643663225	FFI	NA	NA
Dcaf6	1	-0.163654328461485	0.390589411950137	-0.0540331843389125	0.797900637953495	neither	NA	NA
Dcaf7	1	-0.179252467946945	0.197600673720648	-0.0981234808414786	0.579914927966994	neither	NA	NA
Dcaf8	1	-0.160796429676531	0.362420249912082	-0.0677383075500922	0.731902250093011	neither	NA	NA
Dclk2	1	-0.110873713680179	0.543635587399402	-0.0460182035631859	0.830199267640953	neither	NA	NA
Dcps	1	0.0744851284053646	0.738169920324107	0.0730799396456708	0.70934644651634	neither	NA	NA
Dctn1	1	-0.217925608979458	0.235548779313365	-0.0861133325747387	0.658588337933689	neither	NA	NA
Ddb1	1	-0.209576889230618	0.216856034190376	-0.0826425406283991	0.680538506731155	neither	NA	NA
Ddhd2	1	-0.263632271410624	0.113001910986477	-0.0664398715987879	0.741790680399463	neither	NA	NA
Ddn	1	-0.175268963206936	0.356685836734793	-0.0837015568963614	0.671404649922867	neither	NA	NA
Ddr1	1	-0.00696356984340939	0.97940837797865	0.0304045261590527	0.898164370866104	neither	NA	NA
Ddx1	1	-0.132438012230078	0.502676012115722	-0.0424487479172642	0.845344717193643	neither	NA	NA
Ddx23	1	-0.137847117310327	0.491503155112566	-0.0638305349253803	0.744503080845932	neither	NA	NA
Ddx24	1	-0.0673545169146251	0.775240130568894	0.0147596575939297	0.951274864107516	neither	NA	NA
Ddx27	1	-0.117424071591204	0.57049073407146	-0.0376983459746312	0.870015355706884	neither	NA	NA
Ddx39b	1	0.0193614224021587	0.937477014427684	0.0535461136578108	0.799415438579925	neither	NA	NA
Ddx42	1	0.0397864741464761	0.848512279482706	0.0334259693676398	0.880615953244529	neither	NA	NA
Ddx49	1	-0.0370899984739625	0.88697971338548	0.0452670742162433	0.818167868796843	neither	NA	NA
Deaf1	1	0.0873621379309469	0.694498214909756	0.0775265522494775	0.690471642948729	neither	NA	NA
Decr2	1	-0.139705635699056	0.397690672293599	-0.074377455125965	0.708265029042832	neither	NA	NA
Dedd	1	0.114348829666249	0.579449529639702	0.0823409991703605	0.679208057873076	neither	NA	NA
Dennd1a	1	-0.454397345479069	0.00312328567886245	-0.178101190815816	0.29337754589688	FFI	NA	NA
Dennd4b	1	-0.203764599029856	0.271462584316778	-0.0277190300605381	0.901446260994002	neither	NA	NA
Dennd6b	1	-0.0736216769131541	0.750481752427502	0.0314770608427301	0.858180473514111	neither	NA	NA
Denr	1	0.140828204419912	0.482765671156208	0.114474844229117	0.548788649242209	neither	NA	NA
Dffa	1	-0.0505139054071762	0.832532637867296	-0.0201738781349147	0.933155734290414	neither	NA	NA
Dgcr2	1	-0.0908982101955981	0.623039735169584	-0.0121961579673168	0.964052935587975	neither	NA	NA
Dgcr8	1	-0.322170807339583	0.0635475040390728	-0.0794521840749476	0.678670606263673	neither	NA	NA
Dgkd	1	-0.0689045189751942	0.758381179322555	0.0333246875804292	0.884499523059456	neither	NA	NA
Dgkg	1	-0.29764146128333	0.0930689336510613	-0.214392366513392	0.18590080414680701	neither	NA	NA
Dgkq	1	-0.125984982039346	0.459061744906172	0.0404076175896463	0.854099561222613	neither	NA	NA
Dgkz	1	0.0259368604925146	0.921529208665198	0.0843756339593239	0.654252353020353	neither	NA	NA
Dguok	1	0.165101196471873	0.380547001318979	0.154667181050858	0.360392014754435	neither	NA	NA
Dhcr24	1	-0.0125294332069976	0.961348621244116	0.0127342344983055	0.961082283321291	neither	NA	NA
Dhdds	1	-0.0647295301955523	0.735225380446291	0.0301939495404058	0.896139924098806	neither	NA	NA
Dhodh	1	-0.0735775578767021	0.738169920324107	-0.0479364906381327	0.814295191612407	neither	NA	NA
Dhps	1	0.0760952740189501	0.738839851078113	0.0904204959709495	0.640146832793014	neither	NA	NA
Dhrs1	1	0.160502431037247	0.319462266641679	0.03553558227613	0.879734950026822	neither	NA	NA
Dhrs7	1	-0.0798429208813246	0.71369771825859	0.0129011359879071	0.961492398998415	neither	NA	NA
Dhrs7b	1	0.0817020205304209	0.714279730231206	0.0540225231413717	0.781383592731254	neither	NA	NA
Dhx30	1	-0.0424745113258966	0.87015119079453	0.0273341400137213	0.897673160021294	neither	NA	NA
Dhx32	1	-0.113344937371981	0.545324977796275	-0.00155038905061615	0.995312820521543	neither	NA	NA
Dhx38	1	-0.253977336818996	0.133687265081801	-0.0790639776999909	0.687903797660843	neither	NA	NA
Dhx57	1	-0.370698524924954	0.018230407362485702	-0.260772972532294	0.0782506152197988	FFI	NA	NA
Dhx9	1	-0.583345527312195	1.26076803300802e-4	-0.380433685147823	0.0175057827020292	both	NA	NA
Diaph1	1	-0.0884393866348617	0.690231021165361	0.0326293696076358	0.886118721188989	neither	NA	NA
Dip2a	1	-0.200454426743566	0.221871190998182	-0.0730699318323093	0.708265029042832	neither	NA	NA
Diras2	1	-0.0502276774833239	0.80031157549798	0.0474621956735028	0.818636936869758	neither	NA	NA
Dis3l	1	-0.0992579926326199	0.638817857135668	-0.00682772529636244	0.980405588607672	neither	NA	NA
Dlat	1	-0.108153914932721	0.581590077346838	-0.0581711663416885	0.777722827384397	neither	NA	NA
Dlc1	1	-0.297854536136847	0.0666367892350966	-0.186998215783662	0.249124081730704	neither	NA	NA
Dlg3	1	0.100958424812858	0.578663069214857	0.0158216319878034	0.951107279612291	neither	NA	NA
Dlg4	1	0.0189136416138213	0.940325918366755	0.0572342348203606	0.776344415747639	neither	NA	NA
Dlg5	1	0.0197389213286412	0.937633929229906	0.0285354880675804	0.895372065394065	neither	NA	NA
Dlgap1	1	-0.300291809200935	0.0596952703551476	-0.187328319651096	0.234430243857506	neither	NA	NA
Dlgap2	1	-0.260187487058908	0.143139612260656	-0.240298805274775	0.116286426246096	neither	NA	NA
Dlgap3	1	-0.167540993564307	0.387038631374533	-0.0610458264200563	0.754428467997561	neither	NA	NA
Dlgap4	1	-0.0801644165084865	0.724838316763598	-0.00992573023093436	0.968609893565693	neither	NA	NA
Dlst	1	0.0141217474381866	0.948048437402218	0.00657604718728699	0.980532290103812	neither	NA	NA
Dlx1	1	-0.032842158749183	0.900304576241407	-0.0815008489797419	0.667654493972282	neither	NA	NA
Dmwd	1	0.00463431176514515	0.985963795554432	0.0418226551688206	0.845146245811925	neither	NA	NA
Dnaja3	1	-0.0875110422230624	0.601736703010359	-0.0823161328976218	0.665027434767301	neither	NA	NA
Dnajb2	1	0.0945295756726303	0.655877202224889	0.0219695496209536	0.929648735500224	neither	NA	NA
Dnajb5	1	-0.0393660865767303	0.876926564066977	-0.087001611345851	0.664356788667274	neither	NA	NA
Dnajc11	1	0.0585295504057291	0.795287176455048	0.0611078815031896	0.758443003856816	neither	NA	NA
Dnajc13	1	-0.258064807433284	0.130964521106278	-0.0922813832586525	0.642871389081958	neither	NA	NA
Dnajc14	1	0.0672732388916671	0.774203044833683	0.0229130039724293	0.926804112037979	neither	NA	NA
Dnajc18	1	-0.0372339005645938	0.851604061025676	0.0179585534499077	0.941772168170763	neither	NA	NA
Dnajc2	1	-0.115392426746261	0.474135830175714	-0.0160968792435341	0.948710200649962	neither	NA	NA
Dnajc27	1	-0.0304047910112581	0.882251689188359	-0.00318393550495276	0.991046863350163	neither	NA	NA
Dnajc5	1	-0.0175399262899173	0.927369513112286	-0.0246466873738408	0.920265462517555	neither	NA	NA
Dnajc7	1	0.0765234097527344	0.665064609329266	0.0495749830295089	0.813057374269893	neither	NA	NA
Dnm1	1	-0.132679392709034	0.5070428664346	-0.0333618969214512	0.88352867829608	neither	NA	NA
Dnm2	1	-0.0200117336445414	0.937633929229906	0.0231908483163057	0.9248440502553	neither	NA	NA
Dnmt1	1	-0.412373953524944	0.0107414765723368	-0.149119807626917	0.404145464807996	FFI	NA	NA
Dnmt3a	1	-0.145148251548455	0.465586229021504	-0.0854697429309726	0.667654493972282	neither	NA	NA
Dnpep	1	-0.0725894368163713	0.747584440390021	0.0309887544287945	0.890369932005754	neither	NA	NA
Doc2a	1	-0.244269072640078	0.130964521106278	-0.0994088109117524	0.608769948536204	neither	NA	NA
Dock3	1	-0.301577952243719	0.0754374036303513	-0.0526308465598859	0.800750286490783	neither	NA	NA
Dock9	1	-0.257031077275371	0.122189615794934	-0.100547214470332	0.600830521723413	neither	NA	NA
Dop1a	1	-0.168252657048906	0.369114421467534	-0.0347918598662718	0.881019458841003	neither	NA	NA
Dop1b	1	-0.194124142616752	0.285301637196963	0.00564217933388782	0.982235633920797	neither	NA	NA
Dpf2	1	0.0110056556055063	0.964885082046292	0.0187993262738286	0.937413062161282	neither	NA	NA
Dph7	1	0.088294561559983	0.673012749570511	0.128775402441405	0.458827735539954	neither	NA	NA
Dpp3	1	-0.0787411377070873	0.72590283138503	-0.0144513402371068	0.954902124601678	neither	NA	NA
Dpp6	1	-0.0832616493390771	0.677078172371142	-0.0574995598406508	0.780548580152656	neither	NA	NA
Dpp7	1	-5.43873780076017e-4	0.997943692593262	0.0173173686773168	0.93095202433329	neither	NA	NA
Dpp8	1	-0.426385647444289	5.76671981963709e-4	-0.188863215740318	0.182865235977379	FFI	NA	NA
Dpp9	1	-0.337869955095238	0.0307993613635975	-0.14886660941359	0.404662600420667	FFI	NA	NA
Dpysl3	1	-0.359481228118556	0.00952507775636156	-0.211702428855114	0.129796139133113	FFI	NA	NA
Dpysl4	1	-0.143222938861147	0.477901464870579	-0.0396210006101459	0.857068951251038	neither	NA	NA
Dpysl5	1	-0.246784437984864	0.143139612260656	-0.0938425430540741	0.636356589501936	neither	NA	NA
Drc1	1	-0.166592987097338	0.387607586451959	-0.0525348585930386	0.802546930033213	neither	NA	NA
Drg2	1	0.0404371280969436	0.87275543559323	0.0135323031741428	0.957567374734464	neither	NA	NA
Drosha	1	-0.158388846802672	0.373601504061185	-0.038152838319979	0.865720998843706	neither	NA	NA
Drp2	1	-0.249317409706959	0.145035036551572	-0.17477240795304	0.310351904754892	neither	NA	NA
Dscam	1	-0.259322461436617	0.07701158062057	-0.116765019379231	0.527676028535878	neither	NA	NA
Dscaml1	1	-0.0201917899323526	0.938104719417058	-0.0278594689481825	0.899273372592282	neither	NA	NA
Dst	1	-0.0976779685748154	0.654936290512079	0.0822026091391453	0.68103069728738	neither	NA	NA
Dstyk	1	-0.282439365185827	0.0622060460676286	-0.115320035214836	0.542788203633788	neither	NA	NA
Dtd1	1	-0.0136932803041135	0.950866095678615	-0.0156236562607583	0.950359444209579	neither	NA	NA
Dtnb	1	0.0590504628328598	0.807505006007694	0.042223423980213	0.833497269980626	neither	NA	NA
Dtx1	1	-0.0857567015362764	0.673690186043282	-0.0436291906335666	0.838338906428123	neither	NA	NA
Dtx3	1	0.157688382380071	0.412650861037502	0.0709523724840584	0.715504737539244	neither	NA	NA
Dus1l	1	-0.0682858491883661	0.771074317333686	0.0225386461202287	0.921587818769377	neither	NA	NA
Dus2	1	-0.144019530169903	0.475709580752676	-0.0308660541082296	0.891016595172454	neither	NA	NA
Dus3l	1	-0.176503147463509	0.330311258405066	-0.00585984468540538	0.981199427070549	neither	NA	NA
Dusp1	1	-0.365058840057545	0.0159036402050366	-0.58980973536955	3.18112951829221e-4	both	NA	NA
Dusp14	1	-0.0879425160334226	0.66456533325794	-0.0577410382693256	0.774930846127118	neither	NA	NA
Dusp26	1	0.069747385361873	0.749231985453325	0.0653308617233168	0.744256291510182	neither	NA	NA
Dusp7	1	0.197018421979399	0.271371081927176	0.109560384496198	0.565665952998432	neither	NA	NA
Dvl1	1	-0.0262979606739701	0.913308233659836	0.0433303481255701	0.837772808552367	neither	NA	NA
Dxo	1	-0.124211635985779	0.543118279141392	-0.0260629993956326	0.902952228826233	neither	NA	NA
Dym	1	-0.0234766668005624	0.920971587138847	0.0322996840725533	0.890369932005754	neither	NA	NA
Dync1h1	1	-0.254956758744361	0.145035036551572	-0.0697710260295816	0.690320075034233	neither	NA	NA
Dync1li1	1	-0.00762115290006759	0.977111227521909	-0.0299651027568956	0.899273372592282	neither	NA	NA
Dync2li1	1	-0.0833127890446997	0.672579628317944	-0.0692039466153346	0.729161060975107	neither	NA	NA
Dzip1	1	-0.262040371639913	0.116277047225367	-0.1562098098104	0.372842091875839	neither	NA	NA
Ebna1bp2	1	0.0512439329062955	0.834050268899476	-0.0103767291561749	0.97002985580217	neither	NA	NA
Ece1	1	-0.120915868726262	0.521762275955513	-0.0786169888561385	0.686326863758839	neither	NA	NA
Ech1	1	0.0294635386540759	0.909069176733256	0.0311160421061287	0.886923246463456	neither	NA	NA
Echs1	1	0.0580842869673731	0.795738228099223	0.0805192702770145	0.683763500215465	neither	NA	NA
Eci2	1	-0.15271758344191	0.384126220736124	-0.0262339305861149	0.914415910540346	neither	NA	NA
Ecpas	1	-0.327060042745166	0.0485440879486233	-0.135228475640606	0.44617107782458	FFI	NA	NA
Ecsit	1	-0.00584284863176047	0.98302761534128	-0.00413207033315563	0.987992780049716	neither	NA	NA
Edc4	1	-0.138027054935454	0.497874059166254	0.0306297221543344	0.852056993581413	neither	NA	NA
Eef1akmt1	1	0.0261635036840793	0.912731659144026	0.0289148507726282	0.903109571615322	neither	NA	NA
Eef2	1	-0.0559748757001051	0.812238837923141	0.014938070648021	0.953380183629501	neither	NA	NA
Eef2k	1	0.0284112233580716	0.91178312109483	0.0744056249052316	0.708265029042832	neither	NA	NA
Eefsec	1	-0.146492580426487	0.465866495840585	-0.102219234963379	0.577954216898836	neither	NA	NA
Eepd1	1	-0.187962567164774	0.307092818886763	-0.0848971254118352	0.66820000242873	neither	NA	NA
Efcab2	1	-0.48057101141256803	0.00127319653146847	-0.363556195708163	0.0269390856639008	both	NA	NA
Efna3	1	0.0856210308621251	0.632083502318378	-0.0339312184486386	0.88352867829608	neither	NA	NA
Efr3b	1	-0.326548857239481	0.00967105234585516	-0.0561238007648273	0.782371222143171	FFI	NA	NA
Egln2	1	0.0298819266282378	0.901734167206351	0.00740600727984468	0.978258949991114	neither	NA	NA
Egr1	1	-0.0938049107028934	0.668486457006905	-0.426142773837135	0.00796899509169505	CJD	NA	NA
Egr4	1	-0.242999401039489	0.182168901201218	-0.124644352700294	0.450745783741889	neither	NA	NA
Ehd1	1	-0.163888739486761	0.296570418419455	-0.0261893910571709	0.913697322583026	neither	NA	NA
Ehd3	1	-0.0676158872992272	0.707035472729272	0.0121187709300318	0.964515681176455	neither	NA	0.00465442913911208
Ehmt2	1	-0.0301456628889196	0.906226796078718	0.0371373796818331	0.861023462179657	neither	NA	NA
Eif2ak1	1	-0.121718126583232	0.392658639228329	-0.0293501143986616	0.899273372592282	neither	NA	NA
Eif2b3	1	-0.0795107891363765	0.721904773511376	-0.0124083481776179	0.961082283321291	neither	NA	NA
Eif3a	1	-1.04928968037404	8.77780104754714e-11	-0.549187530545556	2.2937033963842e-4	both	NA	NA
Eif3b	1	0.0149817587252543	0.955897229264686	0.0652982766546919	0.721829946079868	neither	NA	NA
Eif3c	1	-0.116556891508032	0.572231729157898	-0.0302503365495755	0.895543533852103	neither	NA	NA
Eif3d	1	-0.0904454255207807	0.670478063376433	-0.0103279631521952	0.969188116963378	neither	NA	NA
Eif3i	1	0.0599907236886884	0.780591038070492	0.0470657438825134	0.826229930041571	neither	NA	NA
Eif3l	1	-0.014103962095055	0.956888533046384	0.0267637281288734	0.908964924423029	neither	NA	NA
Eif4a3	1	0.0999020831197771	0.644552828052853	0.0990226696128166	0.596182539222813	neither	NA	NA
Eif4e	1	0.0279477840598632	0.905161210807071	-0.0326500345092535	0.889743106562779	neither	NA	NA
Eif4ebp2	1	-0.0575024305258384	0.799374659426205	-0.046575585271213	0.828302744264591	neither	NA	NA
Eif4g1	1	-0.0118899196244001	0.958828683228999	-0.0497238627037178	0.813057374269893	neither	NA	NA
Eif4g3	1	-0.0312443388448332	0.898156756076679	-0.00226941863792525	0.993357014449155	neither	NA	NA
Eif5b	1	-0.0572507204264253	0.799374659426205	9.46324669183429e-4	0.995193515941572	neither	NA	NA
Eif6	1	-0.0202527519152031	0.935919469650023	0.0500976357607092	0.805288186603449	neither	NA	NA
Eipr1	1	0.0569631019491476	0.813386970621235	0.0713051377972629	0.713488723983473	neither	NA	NA
Elac2	1	-0.0718432345204552	0.758381179322555	-0.00728165059951173	0.97604334635442	neither	NA	NA
Elavl3	1	-0.0618752633220012	0.779898742778537	-0.0751139176836085	0.706037623668845	neither	NA	NA
Elfn2	1	-0.48544012559881	5.34962068499387e-4	-0.464751040817397	8.17886207525967e-4	both	NA	NA
Elmo2	1	0.107829551132749	0.52063224588279	0.0733558206536564	0.710656530353002	neither	NA	NA
Elof1	1	0.182221933440946	0.310872622079771	0.0879494027788285	0.656519814567435	neither	NA	NA
Elp2	1	-0.360995819273298	0.00952507775636156	-0.176673392043235	0.263206652765448	FFI	NA	NA
Elp3	1	-0.128407353057715	0.499394966571971	-0.0225040397860331	0.927480183993695	neither	NA	NA
Elp6	1	-0.248430574782482	0.163485191642449	-0.0634924433965634	0.749139908245585	neither	NA	NA
Emc8	1	-0.0222033974438872	0.92216622696327	0.0697358902980854	0.726884485886312	neither	NA	NA
Eme2	1	0.00657684087367239	0.981436555927521	0.024668401837385	0.908928224991187	neither	NA	NA
Eml1	1	-0.0195358732155299	0.928165781738463	-0.0011344257175757	0.996900766144588	neither	NA	NA
Eml2	1	-0.198852798204767	0.202325364854082	-0.0421266737087624	0.849790962641545	neither	NA	NA
Eml5	1	-0.0141492913168384	0.956407945847262	0.0431571918486436	0.796820770439842	neither	NA	NA
Emsy	1	-0.150845542037049	0.430294719706456	-0.00432455603705893	0.987470970100519	neither	NA	NA
Enc1	1	-0.358833660391118	0.00654202996194377	-0.136567945229935	0.39169787318099	FFI	NA	NA
Eno1	1	-0.0891161635966466	0.674285973909387	-0.0460440713101121	0.827858739351659	neither	NA	NA
Ensa	1	0.175591845348842	0.244770205740468	0.0733871993424773	0.700893947653365	neither	NA	NA
Entpd4	1	-0.0297852626390986	0.900405447359156	0.00849991389028112	0.974182578606159	neither	NA	NA
Entpd4b	1	-0.0226208786968626	0.924201232738613	-0.00454340439808421	0.987613917027991	neither	NA	NA
Entpd6	1	-0.028068288201867	0.909190640194932	-0.0126935145301917	0.962592939197351	neither	NA	NA
Ep400	1	-0.179763376295546	0.339467613074967	-0.00611199376156582	0.974809749006966	neither	NA	NA
Epb41l1	1	-0.225889719392833	0.123008954286594	-0.0371003911745581	0.870720587941572	neither	NA	NA
Epc1	1	-0.37330482229537	0.0284380028997248	-0.221302613441206	0.169734699776469	FFI	NA	NA
Epha10	1	-0.214790399010698	0.190013393241992	-0.021518068259937	0.93095202433329	neither	NA	NA
Epha7	1	-0.127859424232836	0.528882747870178	-0.0500482636844962	0.81338922488977	neither	NA	NA
Ephb1	1	-0.0470158912786097	0.834272148959961	0.0264552828124567	0.911366914816296	neither	NA	NA
Ephb3	1	-0.33720660820262	0.0450946719292508	-0.0617435864285251	0.739367466599564	FFI	NA	NA
Eps15l1	1	-0.11247529571403	0.580159691882966	-0.0720431702591649	0.715504737539244	neither	NA	NA
Ercc2	1	-0.0380410312233299	0.87800602296324	0.0583926051049625	0.652562320632091	neither	NA	NA
Ercc3	1	-0.204922248057311	0.247195087094621	-0.00847136756645974	0.9729741777473	neither	NA	NA
Eri3	1	-0.10823820370512	0.614842235612164	-0.0186119581283099	0.935199015065571	neither	NA	NA
Erich3	1	-0.696246801153211	1.87869825992965e-6	-0.549088791699152	2.40604934952234e-5	both	NA	NA
Erlec1	1	-0.193401430829719	0.21244427357916	-0.0846358671360882	0.661602931934431	neither	NA	NA
Erp44	1	0.126480385360329	0.539318373444947	0.0854605716385267	0.667654493972282	neither	NA	NA
Esd	1	-0.0798586169339388	0.71888598326415	-0.0118379164431879	0.96538395590156	neither	NA	NA
Esyt1	1	-0.109301716679701	0.609580839233308	0.022377306959768	0.918523387945663	neither	NA	NA
Etfdh	1	-0.309857368304702	0.0589282519491139	-0.146324325624691	0.406721961805687	neither	NA	NA
Ets2	1	-0.172643696148192	0.28379279137582	0.0371490036394206	0.872449836960073	neither	NA	NA
Evi5l	1	-0.134305241383937	0.484188277888533	-0.0306117546812939	0.895543533852103	neither	NA	NA
Ewsr1	1	-0.0637616391915106	0.78698909292771	0.0283406493812413	0.900765179801279	neither	NA	NA
Exd2	1	-0.176772056421725	0.254287442306252	0.0180017520701953	0.938511174612933	neither	NA	NA
Exoc3	1	-0.186347461824172	0.202065640788862	-0.0272933550026195	0.908964924423029	neither	NA	NA
Exoc4	1	-0.215683822199348	0.152658451737376	-0.0266630214963471	0.912226967069883	neither	NA	NA
Exosc10	1	-0.0550361658310558	0.821524454194863	-0.00657952220464862	0.980529428057025	neither	NA	NA
Exosc2	1	-0.0728891466123366	0.700669433498196	0.0140718147900486	0.956483680439141	neither	NA	NA
Exosc8	1	-0.0163546358878126	0.950939402882472	-0.050035598392917	0.792772974264449	neither	NA	NA
Exosc9	1	-0.0279723885650597	0.910889255066982	-0.0134372588380578	0.959388698991703	neither	NA	NA
Ext1	1	-0.115474199296917	0.586699562550006	-0.0385075542615426	0.852056993581413	neither	NA	NA
Ext2	1	-0.102901070026717	0.597817364490524	-0.00637088771184079	0.980532290103812	neither	NA	NA
Extl1	1	-0.0703747214487225	0.741194650910951	0.0273268957280767	0.909266853637183	neither	NA	NA
Extl3	1	-0.0904875751163933	0.653315527804898	-0.0103028408934831	0.97002985580217	neither	NA	NA
Ezh1	1	-0.163637591050021	0.359754555845466	0.0608511594133641	0.75993198352479	neither	NA	NA
Faah	1	-0.0898581278105316	0.676352971827665	0.0023664467356094	0.993387481081238	neither	NA	NA
Faap100	1	-0.235886602440644	0.190107982209214	0.0331985425708847	0.852385785411908	neither	NA	NA
Fads6	1	-0.314231231200841	0.0127931248503535	-0.0760267307108432	0.702669555097647	FFI	NA	NA
Fahd2a	1	0.0322720719181458	0.900405447359156	-0.0104483545670156	0.969287885175446	neither	NA	NA
Fam102a	1	0.0119874402726499	0.962102924048661	0.0187082600240698	0.939640714432294	neither	NA	NA
Fam120b	1	-0.275625318510119	0.0565090768198166	-0.174908036980917	0.234366528289018	neither	NA	NA
Fam122a	1	0.100131019033086	0.631448754043555	0.0407850439862799	0.805508636876474	neither	NA	NA
Fam124a	1	-0.147462548415247	0.412911114135423	-0.131162522684189	0.456819533183128	neither	NA	NA
Fam131a	1	-0.0044427915782036	0.985963795554432	0.0157080664301828	0.951274864107516	neither	NA	NA
Fam131b	1	-0.1305078573557	0.395245646560543	-0.0310731415944454	0.89277578212421	neither	NA	NA
Fam13b	1	-0.172158872414494	0.356928909330608	-0.129312484628857	0.453665051466983	neither	NA	NA
Fam149b	1	0.118564110062783	0.520077350195905	0.0518807053307093	0.793695259967947	neither	NA	NA
Fam160b2	1	-0.0726916656692153	0.726820889005629	-0.00863300101969553	0.973778848557775	neither	NA	NA
Fam163b	1	0.107857837644704	0.514243622730033	0.0620321018670176	0.754438112637909	neither	NA	NA
Fam168a	1	-0.222072277145235	0.131953830886902	-0.0738323217907903	0.709735990356971	neither	NA	NA
Fam168b	1	-0.151125804005322	0.2388459834267	-0.0560826788020303	0.780290241215773	neither	NA	NA
Fam171a2	1	-0.122446028222691	0.553598031039595	-0.0506319442682641	0.809911158244604	neither	NA	NA
Fam189a1	1	-0.0305649688733435	0.890908717704859	-0.0116951273836982	0.965817992570802	neither	NA	NA
Fam189b	1	-0.132742594896277	0.51114518153472	-0.0663640965873792	0.709735990356971	neither	NA	NA
Fam20b	1	-0.0913339448015383	0.575734039002735	-0.0721508985635089	0.713488723983473	neither	NA	NA
Fam20c	1	-0.0152490598879599	0.954236844926276	-0.0264847738821355	0.904627686582097	neither	NA	NA
Fam214a	1	-0.180495653704014	0.322591830006328	0.0207797612633154	0.92322783816588	neither	NA	NA
Fam43b	1	-0.134290710371107	0.474392988401363	-0.0914731967081223	0.645019490704121	neither	NA	NA
Fance	1	-0.0526499216386467	0.830872116924205	-0.00239023234179878	0.992122109681393	neither	NA	NA
Farsa	1	-0.0413620271784517	0.861960012298167	0.0168334384373182	0.947202531417931	neither	NA	NA
Farsb	1	-0.112389284598334	0.499341560277722	-0.0711086288809326	0.710656530353002	neither	NA	NA
Fasn	1	-0.00393813550461075	0.988448680863576	0.0300247665972434	0.893873129771723	neither	NA	NA
Fastk	1	0.1258531540212	0.53512859985586	0.0987321750914228	0.574445885574571	neither	NA	NA
Fastkd2	1	-0.104981709439552	0.613239574037971	0.00410000823081366	0.980532290103812	neither	NA	NA
Fat1	1	-0.146450471453901	0.464553530482404	-0.0395003346052352	0.845344717193643	neither	NA	NA
Fbf1	1	-0.384608403205599	0.0242664384423675	-0.169320125346419	0.331385469930257	FFI	NA	NA
Fbh1	1	0.0348887099952781	0.892314187355805	0.0834554198049926	0.638890637335519	neither	NA	NA
Fbrs	1	-0.122924978954338	0.511138896962486	-0.0472835191172687	0.826229930041571	neither	NA	NA
Fbxl14	1	-0.149321115347569	0.411196983688191	-0.0741414518599367	0.705959691807313	neither	NA	NA
Fbxl16	1	-0.0330274777570654	0.891966722493662	0.0228327862265952	0.927480183993695	neither	NA	NA
Fbxl19	1	-0.281052487289671	0.0751264093251241	-0.171609088312556	0.298792646607288	neither	NA	NA
Fbxl6	1	0.132853131895523	0.514316795450617	0.0461673474270664	0.810905322065029	neither	NA	NA
Fbxo10	1	-0.43326861175316	5.94380473765028e-4	-0.0978269302683599	0.619460854333924	FFI	NA	NA
Fbxo21	1	-0.142102364064125	0.29150281381105	-0.00135906919666873	0.995871038758473	neither	NA	NA
Fbxo22	1	-0.0659025713729514	0.735652677366067	-0.0326917292101816	0.889277217416854	neither	NA	NA
Fbxo25	1	-0.103346289872397	0.541476834447496	0.0106362048193056	0.968066900387018	neither	NA	NA
Fbxo31	1	-0.142462641588214	0.446505609568169	0.0278834990005217	0.905946068841463	neither	NA	NA
Fbxo38	1	-0.28553460155886	0.0709428785340329	-0.0795703970630284	0.689359251158623	neither	NA	NA
Fbxo41	1	-0.353241434920493	0.0204912879476494	-0.119707180954219	0.518281297471493	FFI	NA	NA
Fbxo6	1	0.0706081597506231	0.761073600320427	0.0582023451226401	0.76407404223781	neither	NA	NA
Fbxo7	1	0.0197500280309386	0.938069825308602	0.00557527957835138	0.982696043803136	neither	NA	NA
Fbxw17	1	0.0976375137894456	0.654936290512079	0.0678363662133522	0.694845878802397	neither	NA	NA
Fbxw4	1	0.155055287562021	0.420795734451196	0.080864421071793	0.687717570993875	neither	NA	NA
Fbxw5	1	-0.0590573824882762	0.788194479596133	0.0371440141119084	0.872640778343778	neither	NA	NA
Fbxw7	1	-0.167035919585003	0.276423635842048	-0.0149722705884923	0.954795657447739	neither	NA	NA
Fbxw8	1	-0.101972941895595	0.629477784618361	0.00164388892312981	0.994885088185543	neither	NA	NA
Fcho1	1	-0.050669578567079	0.840048535195657	0.0330135642053903	0.880929592171466	neither	NA	NA
Fdxr	1	0.0845437420952142	0.700580702912231	0.047347891991733	0.7850508276235	neither	NA	NA
Fez1	1	0.0955288371687673	0.631092292363726	0.318546168770102	0.035213705840357	CJD	NA	NA
Fez2	1	-0.0431000440372728	0.847368266077487	0.0816784709584741	0.683156196622386	neither	NA	NA
Fgf11	1	-0.0986272552334455	0.580159691882966	-0.0789350098366954	0.692106574140184	neither	NA	NA
Fgfr1	1	-0.040918473738247	0.867397268493197	0.0208189099202684	0.933383451134425	neither	NA	NA
Fh1	1	-0.114334270410509	0.473854439550433	-0.0193926597951215	0.93655455583483	neither	NA	NA
Fhad1	1	-0.148926399252883	0.45235329104103	0.00794582515621934	0.972378979762418	neither	NA	NA
Fhod3	1	-0.0770755549431197	0.738839851078113	8.74112050128829e-4	0.996930894899463	neither	NA	NA
Fig4	1	-0.415502467597926	0.00220659107422422	-0.186745334736361	0.24404765056249	FFI	NA	NA
Filip1	1	-0.324231485850786	0.0652083304484206	-0.13991807336796	0.427490191152343	neither	NA	NA
Fkrp	1	0.0694049034910453	0.722946290721578	0.0562946522347219	0.783722072165914	neither	NA	NA
Flad1	1	-0.0711516525216259	0.752192753929024	0.0123673503515714	0.961668307207511	neither	NA	NA
Flcn	1	-0.109777788537704	0.54544862908017	-0.0876067838287946	0.660277048312322	neither	NA	NA
Flii	1	0.0649924043742547	0.779616700126645	0.092146972503538	0.629291016845905	neither	NA	NA
Flot1	1	-0.117054484189516	0.571163369335398	-0.040591336050374	0.852385785411908	neither	NA	NA
Flot2	1	-0.00824359297983192	0.975931444975825	0.0367321448716898	0.874018162784486	neither	NA	NA
Fmnl1	1	0.0731756793169698	0.748687149763098	0.0732214768491106	0.654252353020353	neither	NA	NA
Fn3k	1	0.0316595149460143	0.902737259636073	0.00636052681529243	0.980532290103812	neither	NA	NA
Fn3krp	1	-0.00748807604429829	0.978463843033781	-0.00923128406171802	0.97133623661152	neither	NA	NA
Fntb	1	-0.0343715926157888	0.885475502409818	0.0375329736823944	0.861462671815493	neither	NA	NA
Focad	1	-0.171570291117729	0.343045498576254	0.0471101628403029	0.8097565967886	neither	NA	NA
Fos	1	-0.302254970154348	0.0798057008809159	-1.6657109543198	8.02299132704537e-16	CJD	NA	NA
Foxo3	1	-0.160726371361187	0.342904997600508	-0.0187545925233173	0.939079596477565	neither	NA	NA
Foxo4	1	-0.111316808331247	0.602466010646709	-0.113260345580142	0.521351708920601	neither	NA	NA
Foxp1	1	0.0254784755737992	0.919442756788056	-0.0152270080827866	0.93991865892058	neither	NA	NA
Foxred1	1	-0.0451128718274426	0.843784386256366	0.0194731962711776	0.935199015065571	neither	NA	NA
Frmd4a	1	-0.306297415282843	0.041833376993921	-0.196790349435654	0.223903870716975	FFI	NA	NA
Frmd5	1	-0.197088907606288	0.178813480691885	-0.235327034840493	0.0534671800326404	neither	NA	NA
Frmpd3	1	-0.611470898663487	1.93218884836858e-5	-0.432865013689972	0.00389459370244818	both	NA	NA
Fry	1	-0.392069159148763	0.0117842549912516	-0.112690133862215	0.555735863498618	FFI	NA	NA
Fryl	1	-0.174489943206484	0.361331917617047	-0.137116077851283	0.434461705822792	neither	NA	NA
Fscn1	1	-0.0124935589330255	0.960238816622328	-0.0116007390337471	0.96538395590156	neither	NA	NA
Fsd1	1	-0.0385281263595973	0.880799715975765	0.0160284118388393	0.947660081138651	neither	NA	NA
Ftl1-ps1	1	0.0569993571909529	0.799374659426205	0.0200794680380137	0.918285572935245	neither	NA	NA
Fto	1	-0.219654137603444	0.126838340615149	-0.0242559935769508	0.922651942825774	neither	NA	NA
Ftsj3	1	-0.122291378951194	0.545448786148987	-0.0737489738677282	0.709248716846682	neither	NA	NA
Fubp3	1	-0.151456023781823	0.433005311534143	-0.0415934991428052	0.820115926560318	neither	NA	NA
Fxr2	1	-0.036624820608516	0.885242490690665	-0.0544898322277917	0.795927370658465	neither	NA	NA
Fyn	1	-0.0717203225271277	0.707203235001393	-0.013279865401509	0.958845749897134	neither	NA	NA
Fzr1	1	-0.0894575271620906	0.685250204634311	-0.0126204045413926	0.959177987797121	neither	NA	NA
G6pdx	1	-0.144135427329982	0.354135512461451	-0.0781396584641846	0.687903797660843	neither	NA	NA
Gabbr2	1	-0.18285939587225	0.142913845091291	-0.0785758727680184	0.692106574140184	neither	NA	NA
Gabrd	1	0.00393360751520144	0.988371910818926	0.018949313872766	0.935199015065571	neither	NA	NA
Gadd45b	1	-0.217137649235098	0.219041827143573	-0.0866350549944032	0.651723123829696	neither	NA	NA
Gadd45g	1	-0.0932652520676042	0.670375808330738	-0.0284398524496739	0.901536546002552	neither	NA	NA
Gak	1	-0.152192429632676	0.403965061165734	-0.0228919993563586	0.927480183993695	neither	NA	NA
Gale	1	0.0642233597703349	0.781157088344932	0.0483430523014749	0.813057374269893	neither	NA	NA
Galk1	1	0.146301301374184	0.450802340271883	0.101953349699455	0.488977581039403	neither	NA	NA
Galk2	1	-0.123258098968825	0.509377408682131	-0.0624273464145435	0.754749353753361	neither	NA	NA
Galnt14	1	-0.0784185452883739	0.707673442008023	-0.0557611997138478	0.786608169756429	neither	NA	NA
Galnt16	1	-0.111519845691195	0.539127285940528	-0.00261887707178439	0.992122109681393	neither	NA	NA
Galnt17	1	-0.232906779257816	0.161159756699711	-0.0520356031990602	0.805651898737763	neither	NA	NA
Galt	1	0.0945399549420557	0.633417363951024	0.0129689053421967	0.959586171653444	neither	NA	NA
Ganab	1	-0.10836218968025	0.540373606144161	6.88994736975604e-4	0.998186897862064	neither	NA	NA
Gapvd1	1	-0.391289935346587	0.00981141953561021	-0.336466767847234	0.0129966929817472	both	NA	NA
Garnl3	1	-0.132843187799677	0.477381108415116	-0.0164197590433263	0.948630667855328	neither	NA	NA
Gars	1	-0.0835655283239559	0.694620985711503	-0.00164895108889151	0.994885088185543	neither	NA	NA
Gas2l1	1	0.0701135526050172	0.764116393251867	0.0285287793527449	0.899273372592282	neither	NA	NA
Gas6	1	-0.0480826253549468	0.821802411066475	-0.00858083350947514	0.973778848557775	neither	NA	NA
Gas7	1	-0.230712115831043	0.115517762292011	-0.0298182058758703	0.900262761950188	neither	NA	NA
Gatad2b	1	-0.201994863309415	0.260323588864576	-0.0575060711693779	0.768700259528032	neither	NA	NA
Gatb	1	-0.106426309231078	0.597817364490524	-0.0640127155222656	0.750307430526094	neither	NA	NA
Gatd3a	1	-0.00738963581454539	0.977441032397449	-0.0389607680901404	0.86173993092045	neither	NA	NA
Gba	1	-0.00314656233793106	0.989665950695534	-6.46538882508673e-4	0.998186897862064	neither	NA	NA
Gbf1	1	-0.255090357119667	0.14574553304609	-0.0420446461682202	0.840153565117848	neither	NA	NA
Gcat	1	0.0193969420873603	0.938552976765035	0.0143599946454808	0.750809381902414	neither	NA	NA
Gcdh	1	-0.130768414602109	0.476702610965544	-0.0354745399957494	0.878075279292705	neither	NA	NA
Gclc	1	-0.232030778927713	0.166720506360218	-0.0789265135938505	0.689171321890613	neither	NA	NA
Gcn1	1	-0.0959900815851564	0.661954607937865	-0.0156325281145462	0.948900526609191	neither	NA	NA
Gdap1l1	1	-0.0835317117460291	0.71114889741345	-0.00995078670954628	0.969377240444819	neither	NA	NA
Gdi1	1	-0.0669601468374121	0.707596505693558	0.0248827567789529	0.916152483738439	neither	NA	NA
Gdpd5	1	0.0295696393510061	0.908046152688225	0.0783523480080004	0.687717570993875	neither	NA	NA
Get4	1	0.0539963056640658	0.802559076725891	0.0623385510309728	0.756165471732491	neither	NA	NA
Gfm1	1	-0.238953860718371	0.167448124813342	-0.145874757969083	0.402559490694313	neither	NA	NA
Gfm2	1	-0.233407962316948	0.148770175615637	-0.105296064134357	0.583731802676518	neither	NA	NA
Gfod1	1	-0.275759024339142	0.0765562867036315	-0.120724146863453	0.495845107858724	neither	NA	NA
Gfod2	1	-0.0900181128114256	0.666673068548098	-0.0358026021336033	0.874943974324821	neither	NA	NA
Gfus	1	0.047479165570578	0.845714895115545	0.0600961251390151	0.758443003856816	neither	NA	NA
Ggct	1	-0.112376968010957	0.579201328662535	0.016307369590367	0.946637391000105	neither	NA	NA
Ggnbp2	1	-0.130846510730294	0.487047956914313	-0.094149045276023	0.632607689977419	neither	NA	NA
Gigyf1	1	-0.229018484851832	0.211810095542741	-0.0592735491194109	0.744503080845932	neither	NA	NA
Git1	1	-0.0107218985006337	0.96837227198686	0.00146571603775909	0.995312820521543	neither	NA	NA
Git2	1	-0.202093066212426	0.276688809728836	0.0073662738954419	0.976713871158673	neither	NA	NA
Gle1	1	0.0236912977475796	0.924201232738613	0.0432347836250044	0.840158874979283	neither	NA	NA
Glg1	1	-0.192713464201965	0.232769220424914	-0.074506225083246	0.707903482056671	neither	NA	NA
Glod4	1	-0.202177377550427	0.163485191642449	-0.0632526367616947	0.752933849671014	neither	NA	NA
Gls2	1	0.00988883039774597	0.971029289239584	0.0350178359230045	0.880788185059337	neither	NA	NA
Glt1d1	1	-0.265580636375777	0.110262243163995	-0.123347999207195	0.5030783762293	neither	NA	NA
Glyr1	1	-0.0660582960686353	0.68838142981161	-0.0735713453904612	0.692106574140184	neither	NA	NA
Gm14295	1	-9.02595829911133	1.14199437011118e-13	-0.0476849910128999	0.702669555097647	FFI	NA	NA
Gm14305	1	-1.22807420747358	0.0125583488572984	-0.0646392577431274	0.667654493972282	FFI	NA	NA
Gm14325	1	-1.47927845789525	0.00997997152376941	-0.0821475925403987	0.607005455776726	FFI	NA	NA
Gm14326	1	-1.66400530230308	0.00781853804904228	-0.0279511299776045	0.875503716543861	FFI	NA	NA
Gm14410	1	-3.40530692319366	4.52654293279902e-10	-0.114393042310939	0.361690006729886	FFI	NA	NA
Gm14430	1	-1.15627230590491	1.54502565330291e-7	-0.0949093736458622	0.612769906507827	FFI	NA	NA
Gm4724	1	-2.57006187475244	1.83471119241266e-8	-0.0422825025466265	0.776999781266899	FFI	NA	NA
Gmppa	1	0.0149592573121067	0.953843805286741	0.067513673213736	0.737319301993327	neither	NA	NA
Gmppb	1	0.0328392526107458	0.899407552683136	7.44092372767672e-4	0.997550275870529	neither	NA	NA
Gmpr	1	-0.0355574927041887	0.884947512325388	0.00218781777106829	0.99391926535343	neither	NA	NA
Gmpr2	1	-0.14549456050835	0.409115785453094	-0.0172588068779904	0.94476392503205	neither	NA	NA
Gnao1	1	-0.145546319548075	0.30749204438346	-0.0996721643941482	0.603210019437909	neither	NA	NA
Gnaz	1	-0.15875565596015	0.235742098459128	-0.117776033532752	0.463268378232135	neither	NA	NA
Gne	1	-0.149138601837643	0.45210536138032	-0.010782867258635	0.966345319104583	neither	NA	NA
Gng7	1	0.0664391367322062	0.76850209722838	0.00389357376412891	0.988646864265742	neither	NA	NA
Gnl1	1	-0.0531351371879422	0.824582307974824	-0.00690304476384944	0.980302315594648	neither	NA	NA
Gnl2	1	-0.00260599612869631	0.991600847359484	0.0289012873430678	0.899273372592282	neither	NA	NA
Gnpat	1	0.0473594412683706	0.845194914255213	0.0430834146876581	0.828815964459398	neither	NA	NA
Golga2	1	-0.0369334732179923	0.885348518191231	-0.00714150996944242	0.979304333111478	neither	NA	NA
Golga3	1	-0.224980329671106	0.207779349477384	-0.067112674602096	0.731167500066853	neither	NA	NA
Golga7b	1	0.0652697494683165	0.753796570680046	0.0951135583558358	0.629291016845905	neither	NA	NA
Gon4l	1	-0.284101223849287	0.110862758554981	-0.0208516970278202	0.928501519135693	neither	NA	NA
Got1	1	-0.047242936034322	0.831150433077869	-0.0119145541573803	0.96538395590156	neither	NA	NA
Got2	1	-0.103256449720849	0.592357853452862	-0.0402755405113675	0.856461916712035	neither	NA	NA
Gpat4	1	-0.0370220289909566	0.874517483013629	-0.0361610447598882	0.876167800349744	neither	NA	NA
Gpatch4	1	-0.130012482394896	0.5263215811682	-0.0141621557531846	0.951331218563856	neither	NA	NA
Gpi1	1	0.0489210930223164	0.843784386256366	0.0258003984054909	0.91165092199583	neither	NA	NA
Gpn3	1	-0.142997169491607	0.417982577086297	0.00900892661013531	0.973364886850838	neither	NA	NA
Gpr108	1	0.051746652609363	0.835865841476625	0.0294200408577007	0.888255359859817	neither	NA	NA
Gpr153	1	-0.110525937936715	0.586699562550006	-0.0162618973518634	0.949106915655654	neither	NA	NA
Gpr26	1	-0.551168502941718	5.11905420779075e-6	-0.179815602098773	0.276224808536725	FFI	NA	NA
Gprasp1	1	-0.755729117169656	1.54502565330291e-7	-0.477057140780223	0.00433788238104475	both	NA	0.007341695603031618
Gprasp2	1	-0.567050773971546	1.42202716401069e-4	-0.338125988331511	0.039008149407347	both	NA	NA
Gprin1	1	0.0744699103958774	0.74797720291005	0.00269222973277759	0.991963164692587	neither	NA	NA
Gpt2	1	0.00865673302696143	0.97392414255918	0.012639694631393	0.962666486235954	neither	NA	NA
Gramd1a	1	0.0302877795068889	0.904565352527934	0.061910058488897	0.754428467997561	neither	NA	NA
Gramd1b	1	-0.125601426781846	0.453741437548834	-0.00582789669484778	0.982198141588952	neither	NA	NA
Grb14	1	0.0217620713120985	0.929184612748697	0.0908815089519971	0.619460854333924	neither	NA	NA
Grb2	1	0.124579665103695	0.389961548353537	0.0299078486413905	0.899273372592282	neither	NA	NA
Gria1	1	-0.101306436206899	0.576726118870686	-0.107015203907603	0.56756221319264	neither	NA	NA
Grid1	1	-0.123584744219276	0.487518058417065	-0.0306572371800117	0.896139924098806	neither	NA	NA
Grik3	1	-0.350389686184025	0.0413997632869106	-0.416897288559749	0.0110985003019805	both	NA	NA
Grik5	1	-0.0929453108556795	0.666673068548098	0.00875897068962658	0.973364886850838	neither	NA	NA
Grin2b	1	-0.54280677872708	5.12109304368136e-5	-0.264384882288772	0.0804934293548248	FFI	NA	NA
Grip2	1	-0.0518746912737153	0.83548255332130394	-0.0245091020927491	0.910162299981014	neither	NA	NA
Gripap1	1	0.0526652439330754	0.799374659426205	0.0768450804812094	0.694994711403206	neither	NA	NA
Grk2	1	-0.0425258185237494	0.858088576028418	-0.00955600167024139	0.972035722176302	neither	NA	NA
Grk3	1	-0.26123055737605	0.109973395308079	-0.0622098593242475	0.756993828283488	neither	NA	NA
Grk6	1	-0.0650151404579474	0.757065593101255	-0.0228084851171398	0.927480183993695	neither	NA	NA
Grm4	1	-0.09203066866363	0.652638775442257	0.016186574865348	0.948803067308795	neither	NA	NA
Grwd1	1	0.0244050400243483	0.926455312824294	0.0438267550942944	0.820062593922231	neither	NA	NA
Gse1	1	-0.204398338419563	0.263065176194399	-0.164960787901446	0.337961721073286	neither	NA	NA
Gsg1l	1	-0.0953433885730046	0.621680235194396	0.00439569481923568	0.987992780049716	neither	NA	NA
Gss	1	0.013853004679979	0.959319990475885	0.0342006799473371	0.880407003050411	neither	NA	NA
Gstm5	1	0.0164328551558556	0.940325918366755	0.0876086706502489	0.654252353020353	neither	NA	NA
Gsto1	1	-0.00383746963364313	0.988588272630584	-0.00743585176584726	0.976713871158673	neither	NA	NA
Gtf2f1	1	-0.0343677845402166	0.892142368667108	-0.0428012570621159	0.838394892944651	neither	NA	NA
Gtf2h3	1	-0.0132917534093308	0.95981316248698	-0.00819085618746313	0.97133623661152	neither	NA	NA
Gtf2i	1	-0.0895671442808795	0.681814114832612	-0.0410638041097318	0.852056993581413	neither	NA	NA
Gtf2ird1	1	-0.174659583603525	0.366608756661796	-0.0112273321224276	0.960347928313208	neither	NA	NA
Gtf3c2	1	-0.00360238150705348	0.988790220721137	0.0590910088662404	0.760690372248874	neither	NA	NA
Gtf3c5	1	-0.158099538480667	0.417814340787693	-0.0801105077556427	0.687470362524635	neither	NA	NA
Gtpbp2	1	0.0313069688899001	0.903651508913269	0.0535477130830901	0.782371222143171	neither	NA	NA
Gtpbp3	1	-0.0547341624244188	0.824582307974824	-0.0265072604529474	0.908928224991187	neither	NA	NA
Gtpbp4	1	-0.154818737269009	0.374387250042995	-0.114902624134331	0.543941214085175	neither	NA	NA
Gtpbp6	1	0.0966672685311559	0.655877202224889	0.0605190142412662	0.737747528399696	neither	NA	NA
H2-D1	1	-0.026077133940554	0.912611986709191	0.0540827308658624	0.7987374620594	neither	NA	NA
Hadha	1	-0.0555742261382663	0.819819896058888	-0.0174766753671601	0.933383451134425	neither	NA	NA
Hadhb	1	0.0896520263051055	0.674042650318145	-0.0267262145550818	0.906981673037852	neither	NA	NA
Haghl	1	-0.0777550784402066	0.713997557062758	0.00951740738875603	0.97133623661152	neither	NA	NA
Hap1	1	-0.247172247248045	0.13967686472919	-0.0495993132358861	0.815287767434047	neither	NA	NA
Hars	1	-0.0581169551576272	0.799589056958448	-0.00926589647016593	0.972537602348218	neither	NA	NA
Hbs1l	1	-0.0385616372792062	0.855885904959947	0.0404590384801129	0.852182773885876	neither	NA	NA
Hcfc1	1	-0.306866858024462	0.0508568991304259	-0.14423764496785	0.383373344794885	neither	NA	NA
Hdac1	1	-0.0956258076246476	0.660770458148368	0.0232605825604108	0.920642511180167	neither	NA	NA
Hdac11	1	-0.114907763465763	0.550901615164378	-0.0376722006415106	0.870150822160992	neither	NA	NA
Hdac2	1	-0.140351971426643	0.471989238764324	-0.0286547679054358	0.900765179801279	neither	NA	NA
Hdac3	1	-0.0347431538991728	0.885475502409818	0.0688678648339394	0.720638051480722	neither	NA	NA
Hdac5	1	-0.0781016551731517	0.716765185686557	-0.0276473695486682	0.905121966823196	neither	NA	NA
Hdac6	1	-0.373296238641692	0.0276722836496879	-0.112876149298444	0.554211858487542	FFI	NA	NA
Hdac8	1	-0.186472502626136	0.307762068419622	-0.0839654106955049	0.663404346617164	neither	NA	NA
Hdgf	1	0.13470412224129	0.415760061913898	0.0590422709288068	0.755345262867714	neither	NA	NA
Hdgfl2	1	0.0206876170793225	0.936631408986557	0.00824290029350496	0.97454708204828	neither	NA	NA
Hdhd3	1	-0.0491617054882453	0.842009589823622	0.0403184579966389	0.852056993581413	neither	NA	NA
Hdlbp	1	-0.123943103221193	0.508281994884902	-0.0751424101492052	0.706037623668845	neither	NA	NA
Heatr5b	1	-0.235185328586367	0.183053228521376	-0.0835756093261133	0.676215674660856	neither	NA	NA
Hectd1	1	-0.429574444878477	0.00546898755861041	-0.147840007896986	0.406616755774367	FFI	NA	NA
Hectd3	1	-0.250307328885646	0.14050652229884	-0.0762143139702392	0.703259116884454	neither	NA	NA
Hectd4	1	-0.483901073002347	0.00355149331520776	-0.147610918318239	0.404662600420667	FFI	NA	NA
Helq	1	0.00968757777440831	0.97021809080208	0.0320978514616993	0.851460301096287	neither	NA	NA
Herc1	1	-0.38002611332838	0.0243522855686839	-0.100674456237105	0.593484386293421	FFI	NA	NA
Herc2	1	-0.254218902814819	0.15774230762125	-0.00831574736841843	0.971580051845862	neither	NA	NA
Herpud1	1	0.0285487847034657	0.905015147071094	0.0378007354421015	0.869495768217052	neither	NA	NA
Hexdc	1	-0.088067649444262	0.690647314451121	-0.021374299001666	0.931348177808862	neither	NA	NA
Hgsnat	1	-0.0244689739459755	0.921529208665198	-0.0507484156919745	0.812018781629474	neither	NA	NA
Hid1	1	-0.0959895647947	0.654936290512079	0.00886580724980382	0.973108961103688	neither	NA	NA
Hip1r	1	-0.103687504121329	0.633417363951024	-0.0216529338641192	0.929614225928414	neither	NA	NA
Hira	1	-0.189747212091293	0.267445240167366	-0.0709584838008009	0.712496317033866	neither	NA	NA
Hivep1	1	-0.0211849824802567	0.935685673413048	0.0295035023139104	0.886118721188989	neither	NA	NA
Hivep2	1	-0.286786950474253	0.108366970065573	-0.0321077586924462	0.880407003050411	neither	NA	NA
Hk1	1	-0.235309875177713	0.18479511503944	-0.0718896370585357	0.710512500799913	neither	NA	NA
Hmbox1	1	-0.169085499196204	0.33504328891465	-0.109122714614613	0.56119592460327	neither	NA	NA
Hmces	1	0.0727577734732738	0.752727254718767	0.0593951095062706	0.7610883327914	neither	NA	NA
Hmg20b	1	0.0966345852569434	0.658465883219562	0.106123682831015	0.457718063173878	neither	NA	NA
Hmgcr	1	-0.0502957421765041	0.825576808795161	-0.0623150151146504	0.756308567252973	neither	NA	NA
Hmgxb3	1	-0.0932923851896348	0.668350485347582	-0.0076603806367418	0.975442070128234	neither	NA	NA
Hnrnpu	1	-0.220894479650224	0.182159549642204	-0.045031870030212	0.828000422197507	neither	NA	NA
Hnrnpul1	1	-0.134614847535724	0.402238458648917	-0.0889456354810026	0.654252353020353	neither	NA	NA
Hps4	1	-0.10208238719585	0.634718306058438	-0.0135471982797926	0.953828267210454	neither	NA	NA
Hrh3	1	-0.0851353268429396	0.684094333961079	-0.0237817811395369	0.92322783816588	neither	NA	NA
Hs3st4	1	-0.298805207020494	0.00978332410307539	-0.133206139842239	0.416018851990677	FFI	NA	NA
Hs6st1	1	-0.114946326273345	0.49516020257408	-0.014288727188538	0.956127501365325	neither	NA	NA
Hsd17b10	1	0.0862966292980923	0.681632851249701	0.0206757050971442	0.933211258285073	neither	NA	NA
Hsd17b4	1	-0.196673068503633	0.192808376988401	-0.210261903510188	0.146172526326165	neither	NA	NA
Hsdl1	1	-0.00601823510595156	0.98139659682472	0.0311641282256135	0.896139924098806	neither	NA	NA
Hsf1	1	0.0901183680722706	0.683747305369784	0.00100038545354206	0.996900766144588	neither	NA	NA
Hsf4	1	0.0643372748155601	0.78688608839006	0.039202297490915	0.851461344022899	neither	NA	NA
Hsp90aa1	1	-0.144061051242206	0.459727076389433	-0.0652379323468701	0.744503080845932	neither	NA	NA
Hsp90ab1	1	-0.115324891280933	0.571118064287469	-0.0839349925578292	0.673747745067717	neither	NA	NA
Hspa12a	1	-0.317096906365515	0.0075622670363396	-0.13341730190384	0.452799310143646	FFI	NA	0.006587598640176075
Hspa14	1	-0.27347695532152	0.0707163963135567	-0.06540857304308	0.660221512537477	neither	NA	NA
Hspa9	1	-0.170410794966207	0.207455657915408	-0.122240992881198	0.456819533183128	neither	NA	NA
Hsph1	1	-0.045477103034564	0.849332217827662	-0.0196187058726283	0.935199015065571	neither	NA	NA
Htatsf1	1	-0.249248431381753	0.0522524371204391	-0.105914181493997	0.56119592460327	neither	NA	NA
Htra2	1	0.0175802256742434	0.94556698025452	0.0405221602647249	0.846749435583193	neither	NA	NA
Huwe1	1	-0.23258112650539	0.197036986172396	-0.0957518711995318	0.617331812394159	neither	NA	NA
Iars2	1	-0.382213297423727	0.0129017443934353	-0.0876113155940295	0.652562320632091	FFI	NA	NA
Ica1	1	-0.0973097290160658	0.656376913953248	-0.00664800710741527	0.980333842349094	neither	NA	NA
Icam5	1	-0.129817948837707	0.524822649050703	-0.0569119991847227	0.780311582446661	neither	NA	NA
Ice1	1	-0.357172793055467	0.0407275308835141	-0.0647933693915039	0.718487495426235	FFI	NA	NA
Icmt	1	-0.040450915233331	0.860859414979017	0.0294304680849029	0.899242379424123	neither	NA	NA
Idh2	1	0.0682029914857822	0.759312391289303	0.10147054108982	0.592070670378831	neither	NA	NA
Idh3b	1	-0.0479244388304626	0.825826283817409	-0.0202478523503652	0.93448596819558	neither	NA	NA
Idh3g	1	-0.125358117422234	0.474135830175714	-0.0139427791998303	0.957059201103943	neither	NA	NA
Ier5	1	-0.0672412501854555	0.744047500476527	-0.0689039671524402	0.728000304928016	neither	NA	NA
Iffo1	1	-0.188149241776261	0.285345103550981	0.00313487966408684	0.991046863350163	neither	NA	NA
Ifi27	1	0.0215627424317108	0.934236344966659	0.0624429066365743	0.755762272602374	neither	NA	NA
Ift122	1	-0.220166917909323	0.231848842707304	-0.0715009336548054	0.703617579217403	neither	NA	NA
Ift140	1	-0.280850643651262	0.109950522743834	-0.135530633266369	0.44617107782458	neither	NA	NA
Ift172	1	-0.132246228121772	0.515529974914796	-0.0269008477049568	0.900765179801279	neither	NA	NA
Ift46	1	-0.0113746097871532	0.965667682989931	0.0584863631814901	0.76561766534528	neither	NA	NA
Ift52	1	-0.0924588716931009	0.651356461347284	-0.0802845997942838	0.687903797660843	neither	NA	NA
Igfbp5	1	-0.0985459368397731	0.61167064817589	-0.0630361197115163	0.749139908245585	neither	NA	NA
Ik	1	-0.0774192603010821	0.68777469871664	-0.0658211343701802	0.742880862555416	neither	NA	NA
Ikbkb	1	-0.177204863894147	0.287916211264827	-0.028567429203987	0.899273372592282	neither	NA	NA
Ildr2	1	-0.197744593314042	0.187620375063739	-0.123442440341946	0.493838826415408	neither	NA	NA
Ilf2	1	-0.00602856974557072	0.980629461682785	0.0142916297162733	0.955110315965489	neither	NA	NA
Ilf3	1	-0.174361054163176	0.266376501274913	-0.127021192003962	0.451501342190304	neither	NA	NA
Ilkap	1	0.116467192778698	0.503249309211894	0.0640051557863564	0.75167473261269	neither	NA	NA
Ilrun	1	-0.0978838282916458	0.61782760066965	-0.033971562406617	0.884865868405117	neither	NA	NA
Ilvbl	1	-0.0120440097755265	0.962513324910187	0.0375133676946112	0.867343528855321	neither	NA	NA
Immp2l	1	-0.28773018284309	0.108366970065573	-0.0977072761960345	0.582885149931974	neither	NA	NA
Immt	1	-0.178844357285584	0.273397388367836	-0.165620059825403	0.330035102078808	neither	NA	NA
Imp4	1	-0.253516358577676	0.158754519898129	-0.159275196464021	0.312441925665243	neither	NA	NA
Impdh1	1	0.0161913028403285	0.950091117657019	0.0263785667358606	0.905121966823196	neither	NA	NA
Impdh2	1	-0.0263161967161775	0.916219866258129	0.0601530243013959	0.76430942351899	neither	NA	NA
Ina	1	-0.0339536408498931	0.87950137946376	-0.0274177485611314	0.908964924423029	neither	NA	NA
Incenp	1	-0.21560854445739	0.238093048608411	-0.0926658532506664	0.638600351779582	neither	NA	NA
Inf2	1	0.19834341180108	0.283088840873327	0.139850266264273	0.430327840434434	neither	NA	NA
Ing2	1	0.116683709608657	0.566104178181112	0.0275628236185061	0.901536546002552	neither	NA	NA
Inha	1	-0.0462550122139806	0.846247455271096	0.100022731532832	0.605229163383297	neither	NA	NA
Inka2	1	-0.00362675554676102	0.988371910818926	0.0379953776588969	0.867726813244692	neither	NA	NA
Inpp1	1	-0.239454559841027	0.183962623096976	-0.056171936002942	0.774330367811878	neither	NA	NA
Inpp4a	1	-0.268350508010249	0.0679010319109944	-0.0784804320453221	0.691773472933455	neither	NA	0.004980838677344215
Inpp5a	1	0.00187244474390206	0.992273718190698	0.0645455506512051	0.749576403246599	neither	NA	NA
Inpp5e	1	-0.259699549238606	0.119990762918957	-0.0827614791859957	0.68103069728738	neither	NA	NA
Inpp5j	1	0.00427803988891443	0.98730272030865	-0.0172487638557769	0.939564353183964	neither	NA	NA
Inpp5k	1	-0.177795252974247	0.277032739723764	-0.0573096363686469	0.78164305646872	neither	NA	NA
Insyn1	1	0.0620305612256403	0.778110485074402	0.0109190415207894	0.967680863657948	neither	NA	NA
Ints1	1	0.0131111575788666	0.959886293537523	0.0678403460839615	0.694845878802397	neither	NA	NA
Ints10	1	-0.140693193848788	0.484345932803073	-0.0689601671111078	0.729361220142171	neither	NA	NA
Ints11	1	-0.189466029290507	0.310540330924608	-0.0192844756927141	0.933161360363794	neither	NA	NA
Ints13	1	-0.240197901419968	0.183102487093023	-0.122235403070383	0.503486546080285	neither	NA	NA
Ints3	1	-0.163596883230146	0.387607586451959	0.00736456315223238	0.976642454181587	neither	NA	NA
Ip6k1	1	-0.140000913632136	0.381957765055091	-0.0273847483435681	0.904896937892547	neither	NA	NA
Ip6k2	1	-0.0786894822364584	0.711651395535759	-0.0279309215123158	0.906265843812897	neither	NA	NA
Ipo13	1	0.0994763320653602	0.6462863734873	0.101580166957184	0.580601706515154	neither	NA	NA
Ipo4	1	-0.0604062563165335	0.799374659426205	0.0595849114845324	0.758920458988618	neither	NA	NA
Ipo9	1	-0.10685261288881	0.588531143325073	-0.0245261328596142	0.92097275100295	neither	NA	NA
Iqce	1	-0.0808988766687567	0.721904773511376	0.067991324913617	0.700449168236779	neither	NA	NA
Iqsec1	1	-0.258525958592528	0.076588369823725	-0.0296836577820483	0.900765179801279	neither	NA	NA
Iqsec2	1	-0.101445744229768	0.602131809747791	0.0240393421293715	0.92322783816588	neither	NA	NA
Iqsec3	1	-0.339737033366185	0.0254848281276408	-0.104675774271735	0.587383087158651	FFI	NA	NA
Irak1	1	-0.0318181678511366	0.897181338395244	0.0158082021022145	0.950610290940581	neither	NA	NA
Irf3	1	0.0912179282436232	0.677078172371142	0.0551881492320936	0.754683275874537	neither	NA	NA
Irgq	1	-0.0494656715774799	0.830789927225332	-0.00333542691388503	0.990446714638195	neither	NA	NA
Isy1	1	-0.0403875210545895	0.873279960708951	-0.0499003890219701	0.804872171799087	neither	NA	NA
Isyna1	1	-0.248541190914415	0.149834403889733	-0.146126881334632	0.410684574323374	neither	NA	NA
Itfg2	1	-0.0707620257198042	0.738839851078113	-0.0528335447489046	0.774930846127118	neither	NA	NA
Itga3	1	-0.458492155030746	2.62170901220571e-4	-0.169551518369783	0.328911145168658	FFI	NA	NA
Itih3	1	0.0465837012036034	0.853391594589008	0.140269716914207	0.425195552727306	neither	NA	NA
Itpa	1	0.118013097195965	0.566181114929101	0.0400336417148435	0.856861741890516	neither	NA	NA
Itpk1	1	-0.0249380849074432	0.918672593472067	0.0391140406916792	0.858141456753626	neither	NA	NA
Itpr1	1	-0.916937637416402	1.96593608574344e-6	-0.308690689597638	0.0567497280767227	FFI	NA	NA
Itsn1	1	-0.0295056672856718	0.909069176733256	-0.0174079189860277	0.937404639140056	neither	NA	NA
Ivd	1	-0.112905352191586	0.587193487223866	-0.0597646363636811	0.767912100335184	neither	NA	NA
Jade1	1	-0.296260270819218	0.0385754180331196	-0.0600982231567357	0.76565121127008	FFI	NA	NA
Jade2	1	-0.125863266657128	0.530823452606102	0.0278457221040262	0.904896937892547	neither	NA	NA
Jag2	1	-0.431650117903744	0.0127931248503535	-0.360478791894895	0.0203887674773147	both	NA	NA
Jak1	1	-0.491275312156697	5.53891930034802e-5	-0.331316829738721	0.00867286505179589	both	NA	NA
Jakmip1	1	-0.11754324488255	0.508281994884902	-0.0385607548385289	0.864803416286192	neither	NA	NA
Jakmip3	1	-0.370951946663065	0.0287937488561174	-0.0902422371848614	0.624134312350271	FFI	NA	NA
Jcad	1	-0.188476451653443	0.273690873898808	-0.0565170263052381	0.778360579686572	neither	NA	NA
Jmjd1c	1	-0.189266355321092	0.31426148730786	-0.0454399286128656	0.814726762797853	neither	NA	NA
Jmjd6	1	0.0355613901946449	0.888111718091387	-0.039701541582253	0.857651463103073	neither	NA	NA
Josd1	1	0.0709334801785032	0.708935451652563	0.0731143488165113	0.708265029042832	neither	NA	NA
Jph3	1	-0.113298904086583	0.575850816000186	-0.016207516016161	0.947912522532696	neither	NA	NA
Jph4	1	-0.197987049299835	0.22880620803288	-0.0983875388638715	0.612233957175604	neither	NA	NA
Junb	1	-0.504471921911288	0.0024832679174111	-0.89529005622439	3.37681376519275e-6	both	NA	NA
Jup	1	-0.0757637175773444	0.722485098784044	-0.0356937453782716	0.875894060872785	neither	NA	NA
Kalrn	1	-0.316420566711433	0.071832464115046707	-0.100815654406613	0.585721704582324	neither	NA	NA
Kansl1	1	-0.166750723892827	0.343086921106903	-0.125950695910211	0.490864361166857	neither	NA	NA
Kansl3	1	-0.201531383511255	0.216856034190376	-0.121356654716372	0.490864361166857	neither	NA	NA
Kars	1	0.0339561866864868	0.889170205428348	0.0292133426805862	0.902200397105246	neither	NA	NA
Kat2a	1	0.00130564241129589	0.995616862886672	0.0317259074363644	0.883225183996916	neither	NA	NA
Kat6b	1	-0.328482889700876	0.0553961130508476	-0.14329570239651	0.419487872416335	neither	NA	NA
Katnal1	1	-0.321310567571563	0.0168839512915983	-0.201190877041939	0.162369519767657	FFI	NA	NA
Katnb1	1	-0.209318578191153	0.247727705142393	-0.0682103822928703	0.716437196638838	neither	NA	NA
Kbtbd11	1	-0.0406698118553092	0.874359101512752	-0.00116451681523615	0.99672122004949	neither	NA	NA
Kbtbd4	1	-0.258813952106587	0.0741275393301675	-0.0919824035308966	0.638746703713052	neither	NA	NA
Kcna2	1	-0.335947063700217	0.00546898755861041	-0.12821280740008	0.457718063173878	FFI	NA	NA
Kcna6	1	-0.0088824435658594	0.974018467806438	-0.0252996163855071	0.917073693639693	neither	NA	NA
Kcnab2	1	-0.0952853424367259	0.651434169014957	0.0142182587295773	0.955364250993334	neither	NA	NA
Kcnab3	1	-0.174712693416514	0.328060734406507	-0.00889160430966258	0.973364886850838	neither	NA	NA
Kcnb1	1	-0.243985129983751	0.135359061762551	-0.126260583883422	0.487108004945181	neither	NA	NA
Kcnc1	1	-0.20056231668044	0.194043908790057	-0.10449066378126701	0.588488366939388	neither	NA	NA
Kcnc3	1	-0.177874045222986	0.322787368334239	-0.00768142558354753	0.975442070128234	neither	NA	NA
Kcnc4	1	0.0358615876517235	0.886093783775349	0.0641606890194839	0.749855639270957	neither	NA	NA
Kcnf1	1	-0.09167113520314	0.654936290512079	-0.115664338150296	0.531176410074827	neither	NA	NA
Kcng4	1	-0.0971433158956704	0.657259460344652	0.0261107871801514	0.900765179801279	neither	NA	NA
Kcnh2	1	-0.16515132319806	0.387607586451959	-0.052330928266014	0.795191155992665	neither	NA	NA
Kcnh3	1	-0.0706909198005585	0.763025110288508	0.0367373379076502	0.863014905721918	neither	NA	NA
Kcnj11	1	-0.257891804233055	0.11604223019319	-0.147280074694103	0.378367163065132	neither	NA	NA
Kcnj4	1	0.0173326204592339	0.946515683906281	0.0264812333379139	0.9129743342691	neither	NA	NA
Kcnj9	1	-0.295292378976216	0.0703522887789509	-0.246039692943141	0.100072195323923	neither	NA	NA
Kcnk3	1	-0.133397841765365	0.465866495840585	-0.0226783711307403	0.927480183993695	neither	NA	NA
Kcnk9	1	-0.258559647068691	0.135490983858134	-0.0475921141415429	0.815287767434047	neither	NA	NA
Kcnma1	1	-0.314728177638022	0.0301425532943273	-0.100918823490496	0.596237240614105	FFI	NA	NA
Kcnt1	1	-0.103727769873824	0.632428234384075	0.0434129924369437	0.835121706576707	neither	NA	NA
Kctd10	1	-0.0321206848996717	0.889916632000706	-0.0245835579708061	0.920642511180167	neither	NA	NA
Kctd3	1	-0.188106629516669	0.289547224287715	-0.01907028396208	0.933383451134425	neither	NA	NA
Kdm1a	1	-0.132694614481377	0.476233566463046	-0.0558452641145752	0.78657672228862	neither	NA	NA
Kdm2a	1	-0.346821576403758	0.0361891104159693	-0.0750770109836363	0.705578382172235	FFI	NA	NA
Kdm4b	1	-0.0696424371693686	0.766315506754767	0.035454128057598	0.859204211222968	neither	NA	NA
Kdm5c	1	-0.12396820783608101	0.529252786393362	-0.0406453551560488	0.830199267640953	neither	NA	NA
Keap1	1	-0.165103660520382	0.363961211802025	-0.0360923540565546	0.876127933861111	neither	NA	NA
Khdrbs3	1	0.187052524130508	0.243333293165501	-0.00918409919530547	0.9729741777473	neither	NA	NA
Khk	1	-0.0273597638853802	0.912821749350376	0.0314098245682167	0.886923246463456	neither	NA	NA
Kidins220	1	-0.261700356296085	0.0309563867321972	-0.205056581158076	0.112594076145905	FFI	NA	NA
Kif13a	1	-0.17312922265051	0.287078695085833	-0.0573782480550659	0.781383592731254	neither	NA	NA
Kif17	1	-0.266418950178924	0.130964521106278	3.50685076009322e-4	0.999106253008769	neither	NA	NA
Kif1b	1	-0.513469300594744	5.22754911642424e-5	-0.315505683226748	0.0115665859059198	both	NA	0.005110825269015212
Kif1c	1	0.00156511689336272	0.994330448395828	-0.117075587177563	0.531213121551354	neither	NA	NA
Kif21a	1	-0.38344173113771	0.0045933753768109	-0.111915426071466	0.556453676429893	FFI	NA	NA
Kif3a	1	-0.0842793569913384	0.708206388288057	-0.0350132625527629	0.869383812315649	neither	NA	NA
Kif3b	1	-0.309816455837817	0.0238451663221998	-0.104352317988712	0.585913920051291	FFI	NA	NA
Kif3c	1	-0.0959933791584272	0.632547654649996	-0.0338597150748557	0.885313899904514	neither	NA	NA
Kif5a	1	-0.183598325201878	0.33482258772356	-0.153933743064394	0.385604571315521	neither	NA	NA
Kifbp	1	-0.0715854824989262	0.663110715366141	0.00127057510747145	0.995871038758473	neither	NA	NA
Kifc2	1	-0.0161598217249187	0.951216235662432	0.0375335141587957	0.870448329168597	neither	NA	NA
Kifc3	1	0.0750864692142898	0.744047500476527	-0.0107215879243366	0.966448127145293	neither	NA	NA
Klc1	1	-0.0396641695822015	0.877329851113683	0.0082248688049667	0.974519450809784	neither	NA	NA
Klc2	1	-0.0264129452210453	0.915069731921691	0.00756782451277824	0.976713871158673	neither	NA	NA
Klc4	1	-0.0884743845579534	0.690879923155624	-0.0459128073899286	0.820425333705068	neither	NA	NA
Klf13	1	-0.140953271089784	0.429771179286346	-0.0512014081594239	0.809911158244604	neither	NA	NA
Klhdc10	1	-0.0775989417922537	0.665064609329266	-0.00347937720345446	0.990077234772387	neither	NA	0.0049095758657709924
Klhdc3	1	0.0444664494483744	0.856207026986977	0.0278100850017144	0.905121966823196	neither	NA	NA
Klhdc4	1	-0.0922274448290067	0.666303906782748	0.0303341004014934	0.897739547273373	neither	NA	NA
Klhdc8a	1	0.0212911816538322	0.934708224237381	0.0539858156571614	0.787425285902247	neither	NA	NA
Klhdc8b	1	-0.0973453925685342	0.648626004200621	-0.0406036815499066	0.850222159848145	neither	NA	NA
Klhl12	1	-0.238641374124547	0.143082052721006	-0.12179420944129	0.502805231574613	neither	NA	NA
Klhl18	1	-0.201973714527149	0.254287442306252	-0.0423138489259517	0.83728132526636	neither	NA	NA
Klhl22	1	-0.311818850516303	0.0543184025078502	-0.0970199846699035	0.622681945761763	neither	NA	NA
Klhl26	1	0.00971437478717452	0.971194536931964	0.0523558189663461	0.802128113489335	neither	NA	NA
Klhl33	1	-0.316187916443379	0.07422839024395	-0.0869030288618638	0.660221512537477	neither	NA	NA
Klhl8	1	-0.0380475134086945	0.877329851113683	-0.0135000258730034	0.958498231902142	neither	NA	NA
Kmt2b	1	-0.15513926154233	0.389961548353537	-0.0749543291789426	0.687717570993875	neither	NA	NA
Kmt2d	1	-0.203977308560195	0.269324259368953	-0.0224094627995388	0.907708459497993	neither	NA	NA
Kndc1	1	-0.300080548859004	0.0751264093251241	0.00333830484418661	0.990449794024081	neither	NA	NA
Kpna6	1	-0.241871860450111	0.0936335187145122	0.00626153961259936	0.980532290103812	neither	NA	NA
Kpnb1	1	-0.0640650531219545	0.727355054781429	0.00403627216249264	0.988301455065081	neither	NA	NA
Kptn	1	0.016568842477305	0.950411475616819	0.0245185645223189	0.916225268512635	neither	NA	NA
Kri1	1	-0.162927922655227	0.40477964992908	-0.00443813448281283	0.987992780049716	neither	NA	NA
Krt9	1	-0.276724243390943	0.116472242959314	-0.0668112806824827	0.738976231071841	neither	NA	NA
Ksr1	1	-0.107499932598488	0.61795173438037	-0.0221807381945748	0.929133577949088	neither	NA	NA
Ksr2	1	-0.664366670773882	3.34333757071739e-5	-0.456049648259462	5.95876748517636e-4	both	NA	NA
Ktn1	1	-0.281393836058351	0.0477212090708234	-0.156635211746615	0.353414668514068	FFI	NA	NA
L1cam	1	-0.0611361682286565	0.780426492152876	-0.100388372147639	0.590597232939173	neither	NA	NA
L3mbtl2	1	-0.108523687293977	0.607645763454124	-0.0201036323103112	0.933383451134425	neither	NA	NA
Lancl1	1	-0.0495915317894316	0.828841712659643	-0.017027742704074	0.946637391000105	neither	NA	NA
Large1	1	-0.17972548550704	0.143139612260656	-0.061645990784634	0.759863850744687	neither	NA	NA
Larp1	1	-0.19992104057413	0.171639628499742	-0.0878919035541582	0.659378633151433	neither	NA	NA
Larp1b	1	0.0609046158798056	0.798843170700524	-0.0280821551965729	0.870753753774002	neither	NA	NA
Larp4b	1	-0.136892417997048	0.427909807834856	-0.0871063208244276	0.657332207488142	neither	NA	NA
Larp7	1	-0.219644306575146	0.183267912241805	-0.119814059503181	0.519069618956582	neither	NA	NA
Lars	1	-0.199336563059507	0.256014664658557	0.023367089072114	0.917073693639693	neither	NA	NA
Las1l	1	-0.290272046599576	0.0801531897996901	-0.114706142602966	0.548500716391376	neither	NA	NA
Lasp1	1	0.0342755684468103	0.87950137946376	-0.00196316827405897	0.994212525893924	neither	NA	NA
Ldb1	1	-0.12921482214792	0.516743449034764	-0.0360896359505672	0.874070446324065	neither	NA	NA
Ldb2	1	-0.142904422874507	0.420201992714922	-0.0607752550602451	0.759652946912848	neither	NA	NA
Ldha	1	-0.0432623926033199	0.848990943095495	0.0223238567020387	0.928978426861079	neither	NA	NA
Ldhb	1	0.0357561276992311	0.878048082670145	0.0567670668064281	0.782371222143171	neither	NA	NA
Ldhd	1	-0.0919696409409071	0.674870503703411	-0.0565762297054851	0.752933849671014	neither	NA	NA
Lemd2	1	0.152805895523118	0.439973164409394	0.0773122254824669	0.694994711403206	neither	NA	NA
Letm1	1	-0.186648240246238	0.30749204438346	-0.0889656082676569	0.651723123829696	neither	NA	NA
Lgi2	1	-0.250917368784713	0.0570513044905739	-0.124514585097437	0.50039573138079	neither	NA	NA
Lgi3	1	-0.13963035173046	0.44946381954483	0.0121505301096299	0.963919918779226	neither	NA	NA
Lhfpl4	1	-0.227328118515977	0.149101304617717	-0.0886524970198137	0.650983636516869	neither	NA	NA
Lias	1	-0.0203664933194056	0.92746008399938	-0.0189758766435139	0.938511174612933	neither	NA	NA
Limk1	1	-0.117510800123991	0.527764004785732	0.00253107876084668	0.992390727181739	neither	NA	NA
Limk2	1	-0.0307005617192295	0.903933093983458	0.0249983176268331	0.918983478026178	neither	NA	NA
Lingo1	1	-0.222511054776343	0.0838113569723344	-0.0704476095910421	0.720829132424676	neither	NA	NA
Lmna	1	0.100364306848384	0.646165458241182	0.043109916018843	0.822441076215146	neither	NA	NA
Lmo7	1	-0.239164333957054	0.185274081474587	-0.003475770641203	0.987992780049716	neither	NA	NA
Lmtk2	1	-0.312833862715075	0.0389409009952754	-0.087648887812863	0.660221512537477	FFI	NA	NA
Lmtk3	1	-0.316978040497124	0.0740247796566809	-0.124054582148914	0.474217043586683	neither	NA	NA
Lonp1	1	-0.155181575438613	0.423185604521956	-0.0642881092372962	0.743519608737552	neither	NA	NA
Lonp2	1	0.0210456356293442	0.933524229948572	-0.0103374935275652	0.97002985580217	neither	NA	NA
Lonrf2	1	-0.363714951025449	0.0124843315466537	-0.15780161256415	0.351681118956868	FFI	NA	NA
Lpin2	1	-0.289893024582573	0.072259569884343	-0.19815538587511	0.162369519767657	neither	NA	NA
Lrfn3	1	-0.0411504541561259	0.874038620145937	-0.0049705088904849	0.98362179001474	neither	NA	NA
Lrfn4	1	0.0456399327793054	0.856139172817503	0.044378512375639	0.826229930041571	neither	NA	NA
Lrfn5	1	-0.28213276587657	0.0625911073843931	-0.176128133891676	0.298792646607288	neither	NA	NA
Lrp10	1	-0.0399719101211761	0.877329851113683	-0.0557298497238087	0.777584108420552	neither	NA	NA
Lrp3	1	-0.0368446683124283	0.874724152191398	0.0256693032799202	0.91566008738901306	neither	NA	NA
Lrp8	1	-0.183421967957147	0.294873043182865	-0.0537647705855041	0.794284618026734	neither	NA	NA
Lrpprc	1	-0.207173250821947	0.169805900937028	-0.185834005955872	0.223456391261923	neither	NA	NA
Lrrc4	1	-0.163346144690097	0.24504391915464	-0.0808242360769207	0.686642856284417	neither	NA	NA
Lrrc42	1	-0.0596868077750027	0.799374659426205	0.0145395876412109	0.953411262957585	neither	NA	NA
Lrrc45	1	0.0776241090154569	0.723764886826352	0.0813911490972199	0.548788649242209	neither	NA	NA
Lrrc47	1	-0.109816209855428	0.595171178033023	0.0197758283509458	0.933383451134425	neither	NA	NA
Lrrc49	1	-0.109391059616202	0.567712268289707	-0.0248035396969336	0.920265462517555	neither	NA	NA
Lrrc4b	1	-0.151954746888515	0.374387250042995	-0.0542212015771583	0.797394601450722	neither	NA	NA
Lrrc61	1	-0.0838932444053048	0.674042650318145	-0.0583564396739551	0.760690372248874	neither	NA	NA
Lrrc8a	1	-0.0897718255117565	0.632547654649996	-0.0460393164362688	0.82994197033222	neither	NA	NA
Lrrfip1	1	-0.10026405640796	0.610834044152415	-0.081111023911371	0.687470362524635	neither	NA	NA
Lrrk2	1	-0.28970175126849	0.0853340850982097	-0.0395069208530855	0.832780077451163	neither	NA	NA
Lrrn2	1	-0.0303085637451413	0.900554712238295	0.0035588750849064	0.989628363076651	neither	NA	NA
Lrrtm3	1	0.0734411508644728	0.748971992822171	-0.0112251242596321	0.96623867513785	neither	NA	NA
Lrsam1	1	-0.264513184217114	0.131778270212462	-0.0972032709540941	0.612398690038338	neither	NA	NA
Lrtm2	1	-0.12841087981473	0.415580529011011	-0.0389695848986565	0.86173993092045	neither	NA	NA
Lsg1	1	-0.291138506336325	0.0770957149236272	-0.0282703301484656	0.890369932005754	neither	NA	NA
Lsm1	1	-0.0425656627044016	0.863313183228818	0.00346562696204689	0.988258776932007	neither	NA	NA
Lta4h	1	-0.0928466791512021	0.66127726775658	-0.104808927167939	0.582885149931974	neither	NA	NA
Ltbp3	1	0.0805390656258902	0.722946290721578	0.101308513974899	0.580601706515154	neither	NA	NA
Ltbp4	1	-0.233204738092413	0.17600154714059	-0.0116167465648568	0.958366243691725	neither	NA	NA
LTO1	1	-0.159321595046978	0.383529050017797	-0.101433842062458	0.59953030306503	neither	NA	NA
Luc7l3	1	-0.127640121003152	0.505964828953741	-0.0247443324805108	0.910162299981014	neither	NA	NA
Luzp1	1	-0.155373682633584	0.374060570988798	-0.0434007444975159	0.837911350708069	neither	NA	NA
Lynx1	1	-0.0770684212695876	0.72436717515206	-0.0235474930125789	0.923751804554505	neither	NA	NA
Lypd1	1	0.0207688608192904	0.931773543392231	0.035433195116171	0.880407003050411	neither	NA	NA
Lztr1	1	-0.0236855895983303	0.92402463398792	0.0663416725881873	0.739367466599564	neither	NA	NA
Lzts1	1	-0.217890193357031	0.206404619322177	-0.0687371554382815	0.727996424509912	neither	NA	NA
Lzts2	1	0.0363726177197001	0.887914342941979	0.0302012406038339	0.897990039140053	neither	NA	NA
Lzts3	1	-0.120919207818114	0.482671554790483	-0.0492612449498923	0.813655805457257	neither	NA	NA
Macrod1	1	-0.0285935363162925	0.911637407748598	0.0196546404721045	0.93395421179729	neither	NA	NA
Mad1l1	1	-0.0643339074653501	0.787330500090467	-0.0347097490758728	0.868392609695233	neither	NA	NA
Madd	1	-0.274428560154032	0.118965064602805	-0.139493716477967	0.433986626827165	neither	NA	NA
Maea	1	-0.0649950526546013	0.737401351191063	-0.0440638001357741	0.833497269980626	neither	NA	NA
Maf1	1	0.100341543953434	0.57676755345678	0.086001743232274	0.668005692578667	neither	NA	NA
Mafg	1	-0.0843800983597887	0.658670022540582	-0.0129749475481978	0.960450703889889	neither	NA	NA
Mag	1	-0.141084133727747	0.440290137753177	0.0398346480420348	0.854534788598277	neither	NA	NA
Magee1	1	-0.345697069802139	0.0183753390232459	-0.181218340408923	0.24404765056249	FFI	NA	NA
Magi1	1	-0.237878100028807	0.141925293716525	-0.112880102503491	0.555735863498618	neither	NA	NA
Magi2	1	-0.266857039490574	0.111230886460049	-0.226733935923703	0.134259073586993	neither	NA	NA
Man1b1	1	0.023028413145426	0.923654817482033	0.0424840153658666	0.846252086937395	neither	NA	NA
Man1c1	1	-0.151380732896986	0.338386171865538	-0.0227554123198492	0.927400771547258	neither	NA	NA
Man2a2	1	-0.10799202854958	0.570207637814531	-0.0333139794167833	0.886911735854474	neither	NA	NA
Man2b2	1	0.0233282050460965	0.930177639259295	0.0102312551362768	0.965553494530275	neither	NA	NA
Man2c1	1	-0.0236038687489814	0.928587130117109	0.0504204352614676	0.758443003856816	neither	NA	NA
Maneal	1	0.0825449542767316	0.683834806844338	0.0252407635955605	0.917073693639693	neither	NA	NA
Map1a	1	-0.360288683352586	0.0376584167297793	-0.107295826139266	0.5644695882236	FFI	NA	NA
Map1s	1	-0.139696889873034	0.492983271738165	-0.0371890508163423	0.853528709129542	neither	NA	NA
Map2k1	1	-0.175972358974501	0.168083948232307	-0.101382006906955	0.588488366939388	neither	NA	NA
Map2k5	1	-0.106485628418742	0.521247565236908	-0.0134071343642179	0.959388698991703	neither	NA	NA
Map2k7	1	-0.00183225332192248	0.993665507056426	0.00132161962959134	0.995871038758473	neither	NA	NA
Map3k10	1	0.0167754537493582	0.949397135489615	0.0273741079343983	0.902952228826233	neither	NA	NA
Map3k11	1	-0.287358528555405	0.064330482304004	-0.0903630710610409	0.64613857619975	neither	NA	NA
Map3k12	1	-0.189855517312921	0.27683756339932	-0.0932050882040262	0.638746703713052	neither	NA	NA
Map3k5	1	-0.368297416980087	0.0134863359374469	-0.227328917647371	0.134259073586993	FFI	NA	0.01012341363175476
Map4k2	1	-0.011694763817906101	0.965952525145987	0.0694505355973608	0.719463699131205	neither	NA	NA
Map4k4	1	-0.145289655588669	0.468007990101487	-0.107962938930521	0.570227819508032	neither	NA	NA
Map7d1	1	0.0806977543238558	0.7218350389551	0.0393652127895137	0.854657215636055	neither	NA	NA
Mapk1	1	-0.0724247835274152	0.725510058719113	-0.00530231824619417	0.984422768715931	neither	NA	NA
Mapk10	1	-0.153280493003609	0.440290137753177	-0.0480552835170726	0.811505738363224	neither	NA	NA
Mapk11	1	0.034299739037041	0.894253649954898	0.0566392300043351	0.782371222143171	neither	NA	NA
Mapk14	1	0.078400036661785	0.695566890796745	0.0434886484190352	0.840023223102542	neither	NA	NA
Mapk1ip1	1	0.0260298332034731	0.917380841440712	0.0345069406103122	0.878646096773583	neither	NA	NA
Mapk4	1	-0.115924226979812	0.521247565236908	-0.0271035054077058	0.910162299981014	neither	NA	NA
Mapk8ip1	1	0.0277904970452013	0.91153522765953	0.0758038379035089	0.702669555097647	neither	NA	NA
Mapk8ip2	1	-0.00201860932608606	0.993319879583787	0.104538751918324	0.582202778412664	neither	NA	NA
Mapk8ip3	1	-0.315195811146585	0.0563875069647253	-0.0396122739857636	0.8583619000627	neither	NA	NA
Mapkap1	1	0.00465381485612663	0.986239965633404	0.0360669795645356	0.87436741359705	neither	NA	NA
Mapkbp1	1	-0.197718844822853	0.289230862823644	-0.0333311008185049	0.884865868405117	neither	NA	NA
Mapt	1	-0.144284655659723	0.390349224099359	-0.105586677405722	0.574445885574571	neither	NA	NA
Mark1	1	-0.125921594847754	0.434948297479896	-0.075056670433861	0.700893947653365	neither	NA	NA
Mark2	1	-0.134588211670753	0.461586318750458	-0.0175681363489805	0.94476392503205	neither	NA	NA
Mark4	1	-0.00890704546258804	0.975662327448837	0.0440128938920823	0.833497269980626	neither	NA	NA
Mast1	1	-0.235114256925238	0.187478723385409	-0.0898972603348837	0.649375686663219	neither	NA	NA
Mast2	1	-0.196351545804814	0.27683756339932	-0.0472844223464795	0.815310902763242	neither	NA	NA
Mast3	1	0.0338191945841394	0.894253649954898	0.0923385054343577	0.63985933065056	neither	NA	NA
Matk	1	0.0749834328921713	0.744047500476527	0.0725317185189582	0.710656530353002	neither	NA	NA
Mau2	1	0.0229845602332358	0.924764625354403	0.115650518448832	0.540297211071982	neither	NA	NA
Maz	1	0.0463746029258851	0.849161966167015	0.0323841580982945	0.887681440972992	neither	NA	NA
Mbd2	1	0.144380245015818	0.465361367802264	0.0674478694039912	0.737319301993327	neither	NA	NA
Mbd3	1	0.0353064980458719	0.888111718091387	0.0321766606476381	0.889662731982909	neither	NA	NA
Mbd5	1	-0.12065546734265	0.547776035970824	0.00917618683561632	0.972378979762418	neither	NA	NA
Mbtps1	1	0.0335387253739396	0.898305480038392	0.0390210394730298	0.83623542009413	neither	NA	NA
Mcat	1	0.0524905699955472	0.832532637867296	0.0602729009577478	0.748277463945092	neither	NA	NA
Mccc1	1	0.0277520384005769	0.912731659144026	0.0527083860159076	0.767222250372163	neither	NA	NA
Mccc2	1	-0.0598671112530814	0.796513768274768	-0.0140515897840471	0.955080429957938	neither	NA	NA
Mcf2l	1	-0.134926299905174	0.504685676316715	-0.0280101457967597	0.905131361447802	neither	NA	NA
Mcm3ap	1	-0.163111399591528	0.397985185943074	-0.0194166321493412	0.930264562123278	neither	NA	NA
Mdh1	1	-0.0852258871727329	0.670478063376433	-0.107271325247963	0.563273619061002	neither	NA	NA
Mdp1	1	0.115132865371725	0.499333662902151	0.0927513227998434	0.626146727918511	neither	NA	NA
Me3	1	-0.131545380561079	0.513961655180898	-0.0421587837323985	0.838860764317707	neither	NA	NA
Mecr	1	0.0873932786672035	0.694498214909756	0.0420347807669223	0.83728132526636	neither	NA	NA
Med11	1	0.136940440020767	0.502355584637075	0.0455251588065702	0.793695259967947	neither	NA	NA
Med12	1	-0.00346406208849123	0.988642637681626	-7.644759640123e-5	0.99946670728291	neither	NA	NA
Med13l	1	-0.411304321114692	0.0100666892712065	-0.244789581057853	0.108106026760993	FFI	NA	NA
Med14	1	-0.240829352382971	0.121626386498157	-0.127506436991293	0.457718063173878	neither	NA	NA
Med16	1	-0.107941120916339	0.606676313011584	-0.0351284344939872	0.878646096773583	neither	NA	NA
Med17	1	0.0152957006325292	0.953930358383368	0.0487320742857066	0.812646421413306	neither	NA	NA
Med24	1	-0.128913287635711	0.515529974914796	-8.464229210988e-4	0.997495465883106	neither	NA	NA
Med25	1	0.00488206146887293	0.985852135593681	-0.00223697353971439	0.99264858790738	neither	NA	NA
Med27	1	0.0787928833477455	0.729982096440697	0.0506367516811812	0.809041052162096	neither	NA	NA
Mef2d	1	-0.166974899318424	0.290240873038978	-0.0301566332810869	0.898881151392623	neither	NA	NA
Megf8	1	-0.15950877125601	0.406956365152773	-0.0643753235008867	0.748545982211477	neither	NA	NA
Meis3	1	-0.0895784263678763	0.678595550375557	-0.0225794849293357	0.92322783816588	neither	NA	NA
Men1	1	-0.0716584830615524	0.747669159720216	0.0317059486935646	0.887681440972992	neither	NA	NA
Mepce	1	0.0113010946009316	0.966071652440479	0.0499429113264496	0.809911158244604	neither	NA	NA
Metap2	1	-0.133788103296896	0.452617402770939	0.00416835703963045	0.987992780049716	neither	NA	NA
Mettl14	1	-0.246101831767964	0.111415801568536	-0.155595880337736	0.373338123917311	neither	NA	NA
Mettl16	1	-0.212490829573966	0.229517947459649	-0.0960520056082905	0.619460854333924	neither	NA	NA
Mettl17	1	-0.00828468892462857	0.977475165036964	0.0127591400271252	0.952312581070068	neither	NA	NA
Mettl21a	1	-0.150515965009035	0.44946381954483	-0.0626199993805772	0.731902250093011	neither	NA	NA
Mettl26	1	0.00213776544470366	0.992273718190698	-0.0339956806934569	0.884776304788832	neither	NA	NA
Mfn2	1	-0.227708260962711	0.174079661612887	-0.0282194989668673	0.904627686582097	neither	NA	NA
Mfsd10	1	0.153866709715211	0.374530497140974	0.0783363927019791	0.548788649242209	neither	NA	NA
Mfsd11	1	0.0754655953656964	0.740411702884375	0.0423269845506281	0.836180336627621	neither	NA	NA
Mfsd4a	1	-0.103795714521813	0.603809161550542	-0.0146118798457726	0.954902124601678	neither	NA	NA
Mgat1	1	0.123552086791571	0.524301126020341	0.0829370846606607	0.676824570193677	neither	NA	NA
Mgat3	1	-0.145818047943698	0.391479931973598	-0.0364210057428265	0.875503716543861	neither	NA	NA
Mgat5	1	-0.237932466604334	0.102534859255361	-0.0902736591090608	0.649345398636094	neither	NA	NA
Mgat5b	1	-0.0985803017107716	0.646710651310632	0.0496122870701976	0.813199787285892	neither	NA	NA
Mgll	1	0.0701693242402299	0.73975694657620406	0.0182332208486644	0.941921580146812	neither	NA	NA
Mgrn1	1	-0.107540197428391	0.554986162807068	-0.0223693216820991	0.928607639163426	neither	NA	NA
Mia2	1	0.180846828044485	0.341805571979711	0.102247571062221	0.592329564530692	neither	NA	NA
Mib2	1	-0.204923685800477	0.264664384191552	-0.0316424388950823	0.886911735854474	neither	NA	NA
Mical2	1	-0.154500944421059	0.392155788956894	-0.0439508959765271	0.835570310693105	neither	NA	NA
Mical3	1	-0.131331094325884	0.522962874449014	0.0173824183082451	0.940983932670142	neither	NA	NA
Micall1	1	-0.127146094446373	0.500133121676294	-0.101820075450383	0.593484386293421	neither	NA	NA
Micu1	1	-0.0552707255774564	0.800694181932532	0.0325068781162562	0.889743106562779	neither	NA	NA
Midn	1	-0.218296359390111	0.166893629803119	-0.28092130679139	0.0594868764755529	neither	NA	NA
Mier2	1	-0.0109217115818924	0.968152667717551	0.0570211869187527	0.76430942351899	neither	NA	NA
Miga2	1	0.00505195370316713	0.984843701263956	0.0501025112179642	0.811510864098055	neither	NA	NA
Mink1	1	-0.27103684649617	0.126244206885473	-0.0763836273658998	0.694845878802397	neither	NA	NA
Mipep	1	-0.192778396707572	0.214298632982292	-0.0510825701646467	0.809911158244604	neither	NA	NA
Mknk2	1	-0.0625170403417778	0.782822341814578	0.00228734167940629	0.993596111011019	neither	NA	NA
Mlec	1	-0.0390859160234537	0.864392315456201	-0.0504264459460229	0.813057374269893	neither	NA	NA
Mllt1	1	-0.0903486042320553	0.681814114832612	-0.0140396108913289	0.953990626216569	neither	NA	NA
Mllt6	1	-0.418803539232545	0.00618728022316737	-0.290112075446622	0.0438807502015785	both	NA	NA
Mlst8	1	-0.19543701067644	0.256014664658557	-0.0802055171425574	0.687903797660843	neither	NA	NA
Mlycd	1	0.0269346116183536	0.915779399374186	0.0797406704689829	0.689171321890613	neither	NA	NA
Mmp17	1	0.00767039223737837	0.97786432628348	0.00204462063614365	0.99391926535343	neither	NA	NA
Mmp24	1	-0.0605219891073543	0.778110485074402	-0.00531907070072171	0.984408080201737	neither	NA	NA
Mmut	1	-0.0766029618892111	0.713755898104269	-0.0451371765092581	0.828815964459398	neither	NA	NA
Moap1	1	-0.0785938488869199	0.731050278739521	-0.00587504958358368	0.980532290103812	neither	NA	NA
Mon1a	1	0.0445978200083065	0.859697334507765	-0.00428450224738127	0.986108462497774	neither	NA	NA
Morc2a	1	-0.278703887404795	0.112881342921849	-0.0435364426928291	0.820062593922231	neither	NA	NA
Morn2	1	0.16304938672539	0.398016342941624	0.0688054133074313	0.707309216564104	neither	NA	NA
Mpdu1	1	0.193890690711124	0.287633777187655	0.0956353729884654	0.619460854333924	neither	NA	NA
Mpdz	1	0.0106251719653849	0.969709158215342	0.0187067364960585	0.936365271602783	neither	NA	NA
Mpi	1	-0.0472186218095425	0.845684818818473	0.0182369165994136	0.939669225092492	neither	NA	NA
Mpp1	1	-0.157749941846342	0.388335650450665	-0.0975255258255444	0.621027680048835	neither	NA	NA
Mpp2	1	-0.016140819813328	0.948350322604208	-0.00978247788132447	0.97133623661152	neither	NA	NA
Mpp3	1	-0.20091093534914	0.222777726117799	-0.0303495195015397	0.898740197288143	neither	NA	NA
Mpp6	1	-0.00121478339629327	0.995616862886672	0.0717320752298722	0.712284790543718	neither	NA	NA
Mpped1	1	0.0385048467290649	0.874214631614152	-0.00632685467994249	0.980532290103812	neither	NA	NA
Mras	1	-0.0948797113727787	0.612793656540193	-0.0382841386133727	0.86433609211063	neither	NA	NA
Mri1	1	-0.138073966591712	0.495390101102356	0.0280638404649862	0.876976262532563	neither	NA	NA
Mroh1	1	-0.0979447304194519	0.654936290512079	0.0734037642453242	0.689359251158623	neither	NA	NA
Mrpl16	1	-0.0108112621636594	0.967104245632026	0.0175191948664207	0.94476392503205	neither	NA	NA
Mrpl21	1	0.0262313262054432	0.909892994547356	0.00651360030214237	0.980532290103812	neither	NA	NA
Mrpl24	1	0.0531389391354186	0.816263254626572	0.00577433467927328	0.982469087382963	neither	NA	NA
Mrpl3	1	-0.105756448666105	0.599260794933978	-0.0796541971428691	0.689171321890613	neither	NA	NA
Mrpl37	1	-0.0145512432775449	0.955816008433352	0.0139619671065647	0.955364250993334	neither	NA	NA
Mrpl38	1	0.00369609115388511	0.988642637681626	-0.0103563147606128	0.97002985580217	neither	NA	NA
Mrpl4	1	0.0992821584060197	0.649699607167095	0.0475075384379585	0.8097565967886	neither	NA	NA
Mrpl45	1	0.0195405021917915	0.936631408986557	0.0118771997810728	0.965059545352594	neither	NA	NA
Mrpl48	1	0.117050031068102	0.571679401843395	0.0370812672591658	0.870814208531346	neither	NA	NA
Mrpl9	1	-0.0574290773922155	0.760436539502877	0.00276133971722384	0.992122109681393	neither	NA	NA
Mrps27	1	-0.0427339125114133	0.849086919923484	-0.0053035663789328	0.984730552015455	neither	NA	NA
Mrps5	1	-0.0522804592306801	0.828057483656241	0.00815662093353114	0.973364886850838	neither	NA	NA
Mrps9	1	-0.0224709874832518	0.927144786890227	-0.0126876196736764	0.962592939197351	neither	NA	NA
Mrs2	1	-0.365676658040268	0.0111334615667664	-0.377658647700329	0.00207050164514005	both	NA	NA
Msh2	1	-0.199524902050539	0.2388459834267	-0.0881624247069464	0.659554139217685	neither	NA	NA
Msh3	1	-0.141653776631995	0.469388709943208	0.0331740447744021	0.883926687316524	neither	NA	NA
Msl1	1	-0.0195045057579496	0.927144786890227	-0.0381705168174398	0.865720998843706	neither	NA	NA
Msto1	1	-0.10097349531863101	0.623467648702453	-0.0285514671141172	0.903219880740835	neither	NA	NA
Mta1	1	-0.138680670334479	0.483317265037367	-0.0563670737657071	0.782596015669514	neither	NA	NA
Mta2	1	-0.123540917088831	0.542532498393536	-0.0781589559660368	0.694845878802397	neither	NA	NA
Mtch2	1	0.0118175479063594	0.957698564564756	0.0222335539795799	0.929614225928414	neither	NA	NA
Mtcl1	1	-0.444786889207534	0.00483531572063894	-0.384008265229023	0.0152836775435166	both	NA	NA
Mtg1	1	0.100250394439644	0.644552828052853	0.0609140514078455	0.761834857661378	neither	NA	NA
Mthfd1	1	-0.0426380679069256	0.857363038172813	-0.0165990066732339	0.946377563221771	neither	NA	NA
Mthfsd	1	-0.161114026927864	0.39159057045815	-0.0344980047681933	0.880407003050411	neither	NA	NA
Mtmr14	1	0.0380010431594511	0.884669247209813	0.0736030723100139	0.687903797660843	neither	NA	NA
Mtmr2	1	-0.090907047031472	0.600904706217864	-0.0666025602820111	0.742111612991957	neither	NA	NA
Mtmr3	1	-0.308396539108331	0.0520509680404988	-0.104355822692719	0.576448155908178	neither	NA	NA
Mtmr4	1	-0.425594634788632	0.00246120301043804	-0.143439153921316	0.404662600420667	FFI	NA	NA
Mtmr7	1	-0.324236808828797	0.00654202996194377	-0.157528223954732	0.328911145168658	FFI	NA	NA
Mtmr9	1	-0.393698927171135	0.00551229295155766	-0.191569437891354	0.234430243857506	FFI	NA	0.008192290817277969
Mto1	1	-0.122667328281419	0.507807217566642	-0.0837096302358312	0.6714431921973	neither	NA	NA
Mtor	1	-0.158795593109042	0.4192536298629	-0.0397687578731857	0.854099561222613	neither	NA	NA
Mtrex	1	-0.182759759139033	0.29022761591207	0.00381311079256964	0.987992780049716	neither	NA	NA
Mtss2	1	0.0470677788700548	0.835447124592332	-0.0275463113382811	0.908915974398589	neither	NA	NA
Mturn	1	-0.017797938878152	0.937513695455892	-0.00764670804638898	0.976713871158673	neither	NA	NA
Mul1	1	0.0861240142992041	0.694498214909756	0.0586847200490118	0.762524551103949	neither	NA	NA
Mvb12b	1	-0.0246336223171061	0.916901311903105	-0.00652472392411071	0.980532290103812	neither	NA	NA
Mxd4	1	0.0341660383093984	0.895362042618397	0.0205412330390691	0.928394769558821	neither	NA	NA
Mxra8	1	0.0636607076692654	0.744047500476527	0.0835666135100389	0.556453676429893	neither	NA	NA
Mybbp1a	1	0.0296451918303922	0.906330378229668	0.0522868247985566	0.769526302183425	neither	NA	NA
Mycbp2	1	-0.561287546320715	0.00112902207100842	-0.356880096922	0.0188236807355508	both	NA	NA
Myh6	1	-0.107471324730389	0.59867941312364	0.0242593062498099	0.886539473246001	neither	NA	NA
Myh7	1	-0.163389052085191	0.400297223703251	-0.0696491945113191	0.709735990356971	neither	NA	NA
Myh7b	1	-0.281912857910293	0.113045234392773	0.0202423546170635	0.929614225928414	neither	NA	NA
Myo16	1	-0.17303750698118	0.3612723449126	-0.100018854698095	0.588488366939388	neither	NA	NA
Myo18a	1	-0.0317182918200977	0.901929546129398	0.0179084874116819	0.937413062161282	neither	NA	NA
Myo5a	1	-0.193069336514557	0.296933797637791	-3.437149478294e-4	0.999106253008769	neither	NA	NA
Myo5b	1	-0.229522885639735	0.185232545569845	-0.016500305290775	0.946637391000105	neither	NA	NA
Myo9b	1	0.0777845129332282	0.732369284709625	0.107991607594869	0.570909672764032	neither	NA	NA
Myrip	1	-0.177129909059435	0.297626338545514	-0.109674862905894	0.562535576225952	neither	NA	NA
Myt1l	1	-0.413376627204497	0.00129815005617739	-0.228494815471463	0.0974904830853418	FFI	NA	0.004511732963337839
N4bp2l2	1	-0.213063163194536	0.248948837752465	-0.073249852372386	0.711339125603361	neither	NA	NA
Naa35	1	-0.0660074790035006	0.780426492152876	0.0232427608696854	0.91026320442003406	neither	NA	NA
Naa60	1	0.0878483544997859	0.595765388875959	0.0481900461231532	0.820062593922231	neither	NA	NA
Nacc1	1	-0.0712267468586607	0.749361523208559	0.00348394532197107	0.989628363076651	neither	NA	NA
Nacc2	1	-0.168248495506899	0.302613707312089	-0.0466318696589712	0.828302744264591	neither	NA	NA
Naga	1	0.014307587003329	0.955129181563294	0.0783310023167743	0.687903797660843	neither	NA	NA
Nans	1	-0.0772069064864927	0.717098654934569	0.016151920527145	0.948900526609191	neither	NA	NA
Nars	1	-0.118274133400787	0.459727076389433	-0.0679653698332882	0.730321012554845	neither	NA	NA
Nat10	1	-0.188426429924758	0.266180916834829	0.0127522852793276	0.956639785318404	neither	NA	NA
Nat14	1	0.0994975476127694	0.649699607167095	0.0269343387169705	0.901536546002552	neither	NA	NA
Nat8l	1	-0.0410964673227644	0.850359369527353	0.0208111383800592	0.933383451134425	neither	NA	NA
Nav3	1	-0.339277033610035	0.0483004175753937	-0.112200157224957	0.546653862017158	FFI	NA	NA
Naxd	1	0.0604700151264493	0.749361523208559	0.023794683172689	0.92322783816588	neither	NA	NA
Nbas	1	-0.0895199014640732	0.684486529624329	0.00790755943286403	0.973778848557775	neither	NA	NA
Nbr1	1	-0.1792743587619	0.274152330368683	-0.0591665434794666	0.772991705634631	neither	NA	NA
Ncam1	1	-0.0503052989713897	0.801653957733431	-0.0410180433980283	0.852056993581413	neither	NA	NA
Ncapd2	1	-0.00571954209173741	0.983739215306911	0.0676476579129051	0.652562320632091	neither	NA	NA
Ncbp1	1	-0.061917231481052	0.795043959007556	0.0355792442681197	0.870737613439531	neither	NA	NA
Nckipsd	1	-0.00609108371311795	0.9815282533969	0.0409833086248357	0.852056993581413	neither	NA	NA
Ncl	1	-0.094441486179986	0.666269736857053	0.0346060118912095	0.880407003050411	neither	NA	NA
Ncln	1	0.0206087532257029	0.934567810857206	0.0197941367263478	0.934053814584522	neither	NA	NA
Ncoa1	1	-0.197378582791355	0.122276050730913	-0.0226028965878172	0.928043208565642	neither	NA	NA
Ncoa5	1	0.0772193692947086	0.7218350389551	0.0324432394588564	0.880687814971615	neither	NA	NA
Ncor1	1	-0.194386895984597	0.283157344918269	-0.00201870657375827	0.99391926535343	neither	NA	NA
Ncor2	1	-0.194113484060269	0.302208638500321	-0.0723444982242641	0.707336516901069	neither	NA	NA
Ncs1	1	0.025541518215156	0.911284876310703	0.0290027048063566	0.90284357076066	neither	NA	NA
Ncstn	1	-0.107061543168588	0.566493907097674	-0.0742671158235634	0.707475874878509	neither	NA	NA
Ndor1	1	-0.261264446580796	0.145013146027989	0.0196756144614546	0.590597232939173	neither	NA	NA
Ndrg3	1	-0.0111222938373054	0.956268044631288	0.0409890441584321	0.851461344022899	neither	NA	NA
Ndrg4	1	-0.0733450220689446	0.654052800984468	-0.0696901188443791	0.708588790869744	neither	NA	NA
Ndst1	1	-0.13567261189953	0.415307624481006	0.0104423169990148	0.97002985580217	neither	NA	NA
Ndst2	1	-0.131762253634611	0.521247565236908	-0.0530330904005853	0.774930846127118	neither	NA	NA
Ndufa10	1	-0.0078823985893957	0.978077366203194	0.0116060174188088	0.964052935587975	neither	NA	NA
Ndufa9	1	-0.114479192882685	0.547064221286044	-0.0207854584017175	0.933383451134425	neither	NA	NA
Ndufaf7	1	-0.0833732332635263	0.705264941122184	-0.0133523672864343	0.958220933742962	neither	NA	NA
Ndufs1	1	-0.326701050225207	0.00596584064899759	-0.14914893929465	0.351681118956868	FFI	NA	NA
Ndufs2	1	0.049899214376323	0.839698100450383	0.0794688518840505	0.687903797660843	neither	NA	NA
Ndufv1	1	0.00703290938631509	0.980612123130978	0.0336313305933477	0.880407003050411	neither	NA	NA
Nectin1	1	-0.2189255667458	0.126521473945033	-0.0784812101982714	0.693256782906399	neither	NA	NA
Nedd4l	1	-0.0801974018405998	0.68777469871664	0.0138302926118153	0.954795657447739	neither	NA	NA
Nefh	1	-0.359271659257844	0.0284875775338053	-0.109537368252638	0.563225925132739	FFI	NA	NA
Nefm	1	-0.415892114554148	0.00909462030906754	-0.198300555128052	0.233068148290576	FFI	NA	NA
Nek9	1	-0.116624318228351	0.523870027344503	-0.045027816682134	0.830199267640953	neither	NA	NA
Nelfcd	1	0.195883455596892	0.277073748984578	0.148505888280109	0.404662600420667	neither	NA	NA
Nell2	1	-0.157787348407228	0.357422174042587	-0.0192852795743199	0.937404639140056	neither	NA	0.00494107627653543
Neurl1a	1	-0.0701054312429971	0.756559168676081	-0.00188890100032454	0.994273084140147	neither	NA	NA
Neurl1b	1	-0.429750867233159	0.00894017359980926	-0.0744946812215779	0.689441554234447	FFI	NA	NA
Neurl4	1	0.00600848813104319	0.983396766326776	0.112836001606177	0.522504201525434	neither	NA	NA
Nf1	1	-0.481588841963627	0.00203858917464118	-0.175718727274051	0.299391776510946	FFI	NA	NA
Nf2	1	-0.239083472794642	0.171714420929394	-0.084343700855049	0.671404649922867	neither	NA	NA
Nfasc	1	-0.253149096485377	0.0622843418720179	-0.15157238243388	0.346162056899645	neither	NA	NA
Nfe2l1	1	-0.15909921233991	0.327250338284534	-0.0612437737584758	0.760690372248874	neither	NA	NA
Nfic	1	-0.127054103297545	0.528882747870178	-0.00386562049959209	0.988646864265742	neither	NA	NA
Nfix	1	-0.364847962515837	0.0159036402050366	-0.107106592587865	0.568630873891528	FFI	NA	NA
Nfkbib	1	-0.0212190476414414	0.934708224237381	0.021116332606237	0.930921720840189	neither	NA	NA
Nfkbil1	1	-0.00398130762763581	0.988020848395255	0.0563766096856488	0.774803341385064	neither	NA	NA
Ngdn	1	0.100819596411687	0.644717766061854	0.0797573362612021	0.666718677262311	neither	NA	NA
Ngef	1	0.076822268230896	0.730770427177146	0.113295715401051	0.554432383289272	neither	NA	NA
Ngrn	1	0.0347924771575273	0.874990952005472	-0.00641543062268112	0.980532290103812	neither	NA	NA
Nicn1	1	0.0750993703914705	0.665064609329266	0.022538754149855	0.92846498551061	neither	NA	NA
Nif3l1	1	-0.244499346606222	0.137431439958326	-0.152201776952715	0.393224803529889	neither	NA	NA
Nin	1	-0.160632263552722	0.377982928019358	-0.249705866527473	0.11949906352506	neither	NA	NA
Nipal3	1	-0.112958171650895	0.551007130196136	-0.0518428405544758	0.807062511465922	neither	NA	NA
Nipsnap1	1	-0.0094474862378033	0.96837227198686	-0.0033227816963653	0.990528531533119	neither	NA	NA
Nipsnap3b	1	-0.0467387204247468	0.848575504266197	-0.0917795512046497	0.640968105339444	neither	NA	NA
Nisch	1	-0.161001543828065	0.405673741630718	0.00729978746495034	0.976916108044732	neither	NA	NA
Nit1	1	-0.0154739197981097	0.950939402882472	0.0203879770083369	0.930179963666286	neither	NA	NA
Nktr	1	-0.109786099424069	0.605703140149062	0.0438241868529958	0.790896329956406	neither	NA	NA
Nle1	1	0.0331476793046753	0.894791430230198	0.0449029221195123	0.83244274985094	neither	NA	NA
Nlgn2	1	-0.2549637838854	0.0959670127432071	-0.0804356588043609	0.687903797660843	neither	NA	NA
Nlgn3	1	-0.189993656143412	0.205528324390645	-0.1065348176091	0.559620507981966	neither	NA	NA
Nme5	1	-0.111129430865835	0.598642660204257	-0.0198110919150079	0.927480183993695	neither	NA	NA
Nme7	1	-0.0854879757543629	0.702071205091045	-0.119596567405381	0.520820381990234	neither	NA	NA
Nmnat2	1	-0.160853091825308	0.295778304238268	-0.0343350158765633	0.88121727349591	neither	NA	NA
Nmt1	1	-0.100414490928118	0.606322326067516	-0.0134647083375307	0.959388698991703	neither	NA	NA
Noa1	1	-0.141938824008762	0.470359919617006	-0.020814881728757	0.927480183993695	neither	NA	NA
Nob1	1	0.0344191502014512	0.887998988349618	0.0419420888587632	0.846002947574673	neither	NA	NA
Noc2l	1	0.0701308649858504	0.764565336120064	0.0573320883886858	0.752802601198516	neither	NA	NA
Noc4l	1	0.0305324564708675	0.905161210807071	0.0541781336195236	0.783178894711943	neither	NA	NA
Nol10	1	-0.28636957518332	0.0938910705599576	-0.0677047917944055	0.734055691937298	neither	NA	NA
Nom1	1	-0.254424531973042	0.122685492999256	-0.00397916490348817	0.988301455065081	neither	NA	NA
Nop14	1	-0.155952407218053	0.420625255565916	-0.052505080775342	0.804244627151387	neither	NA	NA
Nop2	1	-0.243973022985896	0.151927070767938	-0.115393511034206	0.540873229507785	neither	NA	NA
Nop53	1	0.134732608569732	0.506538811436067	0.0987746278732339	0.605442873197792	neither	NA	NA
Nop56	1	-0.0989873257168995	0.649106535830591	0.0144068070673377	0.955110315965489	neither	NA	NA
Nop58	1	-0.27833090022987	0.106756594297618	-0.162166990434271	0.351681118956868	neither	NA	NA
Nos1	1	-0.303553926674271	0.0789211676506898	-0.33654598169853	0.0394553470293979	CJD	NA	NA
Nos1ap	1	-0.530489711852045	0.00150244572847447	-0.277294188049989	0.0778135279376508	FFI	NA	NA
Nova2	1	-0.155473210241486	0.39662515737023	-0.0965924044171538	0.624134312350271	neither	NA	NA
Npas1	1	-0.0617831579677616	0.797788314976082	-0.0758588493923854	0.685862351632099	neither	NA	NA
Npepps	1	-0.160441995908302	0.360065121290351	-0.0770417823289357	0.694845878802397	neither	NA	NA
Nphp1	1	-0.0846562491906618	0.705493085651143	-0.0386437870125049	0.835879894897459	neither	NA	NA
Npr2	1	-0.0734800307851621	0.743031821227708	0.0347271475946693	0.8720605096242	neither	NA	NA
Nprl2	1	-0.0876093683434933	0.681814114832612	0.00639873515712946	0.980532290103812	neither	NA	NA
Nprl3	1	0.0119337834441466	0.965046419362237	0.0383651314184242	0.849920137950867	neither	NA	NA
Nptxr	1	-0.0924631571183285	0.612857620056586	0.0243050432437559	0.922332981899974	neither	NA	NA
Nr1d1	1	-0.136566732624021	0.461145022497	0.00792211847971091	0.975920111479377	neither	NA	NA
Nr1h2	1	0.0582829402555722	0.811239634883361	0.0148331518809632	0.950359444209579	neither	NA	NA
Nr2f1	1	-0.0897094016770873	0.674398339523798	-0.0718736208421485	0.712375702161029	neither	NA	NA
Nr4a1	1	-0.520597505195475	0.00439567418784602	-0.851670125294079	5.81920552319693e-5	both	NA	NA
Nrbp1	1	-0.0122701836866318	0.962926222874019	0.0220148651802512	0.927955705296506	neither	NA	NA
Nrbp2	1	-0.030588287405514	0.906135221103293	0.0481895548119782	0.787425285902247	neither	NA	NA
Nrd1	1	-0.25288193188825	0.0972385600675739	-0.066099520766031	0.742880862555416	neither	NA	NA
Nrp2	1	-0.424626083705694	0.00180557259684178	-0.225900630946527	0.0905117614716093	FFI	NA	NA
Nrxn2	1	-0.0827038960079208	0.704311086535678	-0.0139707904107939	0.956483680439141	neither	NA	NA
Nsf	1	-0.161783710915267	0.254287442306252	-0.104547734926934	0.582885149931974	neither	NA	NA
Nsmaf	1	-0.270426475008508	0.121546661456106	-0.0496581117309302	0.814295191612407	neither	NA	NA
Nsun2	1	-0.0888402068893623	0.653660234002695	-0.00130035708163156	0.996036456107983	neither	NA	NA
Nt5c2	1	-0.143273363875103	0.398016342941624	-0.0763489334457261	0.692106574140184	neither	NA	NA
Nt5dc3	1	-0.180492182151989	0.265403671346182	0.0211190835566384	0.933383451134425	neither	NA	NA
Ntng2	1	-0.280448070058895	0.0665115187958406	-0.021312510037063	0.933155734290414	neither	NA	NA
Nuak1	1	-0.303816688928832	0.0404614526637304	-0.126213189613697	0.463974648852107	FFI	NA	NA
Nub1	1	-0.0158543849688511	0.948950952403043	0.0089345941923869	0.973364886850838	neither	NA	NA
Nucb2	1	-0.0707431283384607	0.752680637554949	0.0354907126515684	0.879734950026822	neither	NA	NA
Nudc	1	-0.0299712474206097	0.907244853846403	0.0136531434373817	0.955364250993334	neither	NA	NA
Nudt17	1	-0.0670423104106777	0.770433590354063	-0.104260580382645	0.582375115683871	neither	NA	NA
Nudt22	1	-0.0116230801935133	0.966071652440479	-7.99362280835042e-4	0.997495465883106	neither	NA	NA
Nudt3	1	0.143215432661366	0.409484774446612	0.0445985604157909	0.833497269980626	neither	NA	NA
Nudt9	1	0.0328567678704266	0.884271605110644	-0.0114080128059936	0.966448127145293	neither	NA	NA
Numa1	1	-0.104559844349967	0.624506850119502	-0.0589607879877084	0.772225673712967	neither	NA	NA
Nup133	1	-0.292234766504907	0.0979641205904809	-0.015463490982888	0.947202531417931	neither	NA	NA
Nup214	1	-0.0939968659375619	0.668486457006905	0.0560997311371629	0.750307430526094	neither	NA	NA
Nup88	1	-0.143382765945075	0.476319098332685	-0.105237738582187	0.582885149931974	neither	NA	NA
Nxph3	1	-0.0167518331562311	0.948350322604208	-0.012898568397665	0.953823702965046	neither	NA	NA
Nyap1	1	-0.336229420257792	0.0214559190267418	-0.194821814414075	0.232506174522683	FFI	NA	NA
Obsl1	1	-0.0756806590030404	0.738839851078113	-0.0177783899697451	0.933383451134425	neither	NA	NA
Ocrl	1	-0.231173271458445	0.162984228255871	-0.0753661365044922	0.704734521756948	neither	NA	NA
Odc1	1	-0.105759566694129	0.601187761492605	0.00294477773149459	0.991496060472409	neither	NA	NA
Odf2	1	-0.123967107356553	0.548216034963004	0.0142994699035981	0.951613596000317	neither	NA	NA
Ogdh	1	-0.366713363651842	0.0161630344071033	-0.0962626630388932	0.623182986478409	FFI	NA	NA
Ogdhl	1	-0.246343818921286	0.158466735085679	-0.0421803405666893	0.83728132526636	neither	NA	NA
Ogfod1	1	-0.310045529201064	0.0184805575611772	-0.139378388618917	0.423428487010246	FFI	NA	0.008015324826578036
Ogfr	1	-0.0365521994704103	0.887914342941979	0.032619705889594	0.883926687316524	neither	NA	NA
Ophn1	1	-0.0210077020795251	0.930040800621059	-0.0108120124074397	0.957405689614581	neither	NA	NA
Oplah	1	0.0387754501537014	0.873279960708951	0.0264650778046666	0.898740197288143	neither	NA	NA
Oprl1	1	-0.0924959811493511	0.603908916525621	0.00795436205438775	0.975821410911997	neither	NA	NA
Optn	1	-0.071082214741401	0.754720565329311	-0.0477212375174589	0.824445526244726	neither	NA	NA
Orai2	1	0.0261215246488262	0.911733204549078	0.0216189670005328	0.931826110753332	neither	NA	NA
Ormdl3	1	-0.0510582210391365	0.786198249358736	-0.0934487860110687	0.623182986478409	neither	NA	NA
Os9	1	-0.135465727837864	0.496950307834456	-0.0831711141861606	0.678073056908657	neither	NA	NA
Osbp	1	-0.145261668281904	0.276390363774219	-0.0789240148131895	0.689171321890613	neither	NA	NA
Osbpl10	1	-0.20775610758991	0.254996246523356	-0.0200102996949999	0.933383451134425	neither	NA	NA
Osbpl2	1	-0.178721526197643	0.204905408465892	-0.114484680161301	0.507844036850319	neither	NA	NA
Osbpl5	1	-0.211214725904811	0.205076700930973	0.0209822086661287	0.926288249669575	neither	NA	NA
Osbpl6	1	-0.252885732227898	0.108366970065573	-0.0398974757023376	0.85430570864275	neither	NA	NA
Osbpl7	1	0.0413684236053839	0.873279960708951	0.0940302920349416	0.620589304750366	neither	NA	NA
Osbpl9	1	0.0132212878637553	0.95981316248698	0.00953433453913626	0.971901212312998	neither	NA	NA
Oscp1	1	-0.041088570059902	0.866585442786378	0.00583649595304747	0.981199427070549	neither	NA	NA
Otud7a	1	-0.137356517932143	0.491838457390481	-0.0160746464663111	0.945698995927337	neither	NA	NA
Oxa1l	1	0.0555253143339935	0.822945603468432	0.0773862127981626	0.676824570193677	neither	NA	NA
Oxld1	1	0.0413198400976763	0.869354247121853	0.0633894355915523	0.702669555097647	neither	NA	NA
P2rx4	1	-0.17379400512799	0.356213865405375	-0.17889157662303	0.292849125824649	neither	NA	NA
P4ha1	1	-0.0872695602721294	0.693833816515456	-0.0342127499663535	0.875894060872785	neither	NA	NA
Pa2g4	1	-0.00744584422763604	0.977771918833582	-0.0140996740210754	0.956639785318404	neither	NA	NA
Pacs1	1	-0.0864036180524336	0.690231021165361	-0.0151150738899603	0.951819135945197	neither	NA	NA
Pacsin3	1	-0.0708130410642834	0.747482969911384	-0.0485505064851143	0.814295191612407	neither	NA	NA
Paf1	1	-0.068668514004277	0.767771194451212	0.0235992546678014	0.917680337531464	neither	NA	NA
Paics	1	-0.134004071643191	0.451686451926102	-0.0507430131919604	0.812018781629474	neither	NA	NA
Pak1ip1	1	-0.178519962127988	0.248892232689856	-0.0726036973184251	0.714073692341938	neither	NA	NA
Pak6	1	-0.113839032901613	0.56803868737433	-0.0115483405436167	0.96538395590156	neither	NA	NA
Palm	1	0.0432359690477834	0.867623490093274	0.0208196833803176	0.926626785937225	neither	NA	NA
Pam	1	0.0504869225419263	0.839650164749617	0.0415026903584775	0.830199267640953	neither	NA	NA
Pamr1	1	-0.319084312240225	0.0371872080036749	0.00339625528970601	0.98916167501199	FFI	NA	NA
Pank4	1	-0.0429685720979698	0.864913280644879	0.0265912289332043	0.909866560181351	neither	NA	NA
Panx2	1	-0.0185847051069347	0.943000491887482	0.0149598965975907	0.951107279612291	neither	NA	NA
Papss1	1	-0.121838485558605	0.37840546818167	-0.0728918259375784	0.707309216564104	neither	NA	NA
Parn	1	-0.234618531483404	0.149178551639479	-0.0975548167320285	0.616140504323733	neither	NA	NA
Parp1	1	-0.0148592270598772	0.956268044631288	0.072540171699215	0.702248159143408	neither	NA	NA
Patj	1	-0.169250819966666	0.306105210956087	-0.0279246060328317	0.906265843812897	neither	NA	NA
Patz1	1	-0.0749623626119796	0.707596505693558	0.0493581291069732	0.813993942644973	neither	NA	NA
Paxip1	1	0.0832273357121684	0.70795358536031	0.0394721871901443	0.854642137275101	neither	NA	NA
Pbx2	1	0.0297706089048734	0.887623826342311	0.0181900427881711	0.93991865892058	neither	NA	NA
Pcbp4	1	0.0365692471503082	0.887014602838772	0.0331256969456356	0.886304269517283	neither	NA	NA
Pcca	1	-0.301159247310204	0.0858940594677159	0.00795016029147092	0.973364886850838	neither	NA	NA
Pccb	1	-0.177205753797394	0.243842894974564	-0.00747144529241635	0.977783186080534	neither	NA	NA
Pcdh1	1	-0.148989863018296	0.433202212663643	-0.138246072497087	0.434567599465018	neither	NA	NA
Pcdh10	1	-0.0524871206352457	0.826093825741126	-0.0283885779922899	0.904403551720889	neither	NA	NA
Pcdhac2	1	-0.283350286894067	0.111620008294251	-0.251080978210223	0.0903456715899701	neither	NA	NA
Pcdhgc4	1	0.204585654766376	0.180817261173149	0.108371815155016	0.563225925132739	neither	NA	NA
Pcdhgc5	1	-0.206479210318612	0.249581747944152	-0.133618348538099	0.451501342190304	neither	NA	NA
Pcgf1	1	-0.0485648687090687	0.840048535195657	0.0063842156517741	0.980532290103812	neither	NA	NA
Pcgf2	1	0.0260170479576731	0.921529208665198	0.0484167478891097	0.815287767434047	neither	NA	NA
Pcif1	1	0.111457651140953	0.599260794933978	0.137602482476132	0.428323427329491	neither	NA	NA
Pck2	1	-0.120906534816436	0.55761875750987	-0.0306028166037486	0.896139924098806	neither	NA	NA
Pcmtd2	1	-0.17172524228824	0.340372024847681	-0.0888189551376478	0.654252353020353	neither	NA	NA
Pcna	1	-0.179913196902145	0.282528833417005	-0.045006235854325	0.833497269980626	neither	NA	NA
Pcnt	1	-0.309321725602038	0.0751264093251241	0.00715843759555303	0.97454708204828	neither	NA	NA
Pcnx	1	-0.0818390691416161	0.715101523999622	0.0560702263295137	0.739489469415426	neither	NA	NA
Pcnx2	1	-0.164230868297608	0.39159057045815	-0.015324201757744	0.950784170502125	neither	NA	NA
Pcnx3	1	-0.00246722861286487	0.991988678534864	0.0547252582044701	0.763547779613789	neither	NA	NA
Pcsk2	1	-0.252903354677139	0.0358128776564979	-0.0915336876469468	0.616159824310312	FFI	NA	NA
Pcx	1	-0.24592382390049	0.163514266713912	-0.109469892260836	0.556453676429893	neither	NA	NA
Pcyt1b	1	-0.0867440843114631	0.631075132673559	-0.00558616928678916	0.983074478419448	neither	NA	NA
Pcyt2	1	-0.0230326618775313	0.928827250682503	0.0362602177686667	0.872875391888441	neither	NA	NA
Pdcd2l	1	-0.0143900528860097	0.957698564564756	0.0197033425611326	0.93448596819558	neither	NA	NA
Pde10a	1	-0.259213658114809	0.0636489302494693	-0.0239603999450673	0.92322783816588	neither	NA	NA
Pde1b	1	-0.108397232566341	0.592848957211671	0.00463040548283804	0.987470970100519	neither	NA	NA
Pde2a	1	-0.0930276619365516	0.660024166255027	-0.0296167100022908	0.899273372592282	neither	NA	NA
Pde4a	1	-0.0292218875095378	0.906465296989993	0.013820147840498	0.955779940903803	neither	NA	NA
Pde4dip	1	-0.279026962562385	0.106442394847512	-0.0972538296391628	0.5959569441692	neither	NA	NA
Pde8b	1	-0.111464344596104	0.58994550818287	-0.0427577302975104	0.845146245811925	neither	NA	NA
Pde9a	1	-0.0832602589274167	0.709039075033272	-0.0159597934232292	0.943900080093471	neither	NA	NA
Pdk2	1	0.0944748505872133	0.635256496558572	0.086216751573043	0.667654493972282	neither	NA	NA
Pdk3	1	-0.0521978681918039	0.821152016236139	0.0208196187385299	0.926626785937225	neither	NA	NA
Pdrg1	1	-0.0545408640555311	0.770433590354063	-0.0450920798226495	0.830199267640953	neither	NA	NA
Pdss2	1	-0.158039440540249	0.403395585905098	-0.0708453757026334	0.716448126747348	neither	NA	NA
Pdxdc1	1	0.0284312505047843	0.911324551187322	0.0532482384169674	0.7987374620594	neither	NA	NA
Peli3	1	-0.3752857500936	0.00654202996194377	-0.139720823322621	0.431299791510176	FFI	NA	NA
Pepd	1	-0.119458802509804	0.532025723334977	-0.0106542582712462	0.969134502460046	neither	NA	NA
Per1	1	-0.313809768872458	0.0709428785340329	-0.0569169927259264	0.768200351441452	neither	NA	NA
Pes1	1	-0.0523381679794884	0.828221441372327	-0.0870274168577511	0.663404346617164	neither	NA	NA
Pex16	1	0.0744742666347322	0.74797720291005	0.0704499081986499	0.694845878802397	neither	NA	NA
Pex5	1	0.044464947174088	0.851604061025676	0.136201380492995	0.44617107782458	neither	NA	NA
Pex5l	1	-0.0770685083611336	0.706825614504595	-4.2195408891406e-4	0.999106253008769	neither	NA	NA
Pex6	1	-0.0244551382826835	0.926387271399806	-0.0096248396832651	0.97002985580217	neither	NA	NA
Pex7	1	-0.204778725608186	0.259179396437137	-0.0316713428614432	0.886019052529622	neither	NA	NA
Pfkl	1	-0.110817167531078	0.598103569619182	-0.0279983320576067	0.902952228826233	neither	NA	NA
Pfkm	1	-0.2347564303825	0.156006770579519	-0.105155802332723	0.584907938913705	neither	NA	NA
Pfkp	1	-0.177338262397485	0.357019260219443	-0.0400066602955887	0.838048888147541	neither	NA	NA
Pgam1	1	0.0826979917674604	0.657105319171035	0.0595027558042675	0.769077378380793	neither	NA	NA
Pgbd5	1	-0.0861644384128521	0.617401138038684	-0.00876129618383484	0.973364886850838	neither	NA	NA
Pgd	1	-0.104563582209174	0.599569383589881	-0.035305508925005	0.880407003050411	neither	NA	NA
Pgm1	1	-0.0235666102610144	0.92402463398792	-0.00215434563627226	0.99391926535343	neither	NA	NA
Pgm3	1	-0.0290558357557304	0.909069176733256	0.0372094253273019	0.844956042697763	neither	NA	NA
Pgrmc2	1	0.00554085527413396	0.980260011390487	-0.0189431332530868	0.937404639140056	neither	NA	NA
Pgs1	1	0.0325247085180152	0.889539763561191	0.0233374463778293	0.9248440502553	neither	NA	NA
Phactr1	1	-0.0741144013829515	0.74388385348891	-0.0245900062071417	0.913757881419327	neither	NA	NA
Phactr3	1	0.0434765992172038	0.849388708909934	-0.0303798391619218	0.899273372592282	neither	NA	NA
Phb2	1	0.0133012222931955	0.958826913581851	0.0198338778628417	0.935177458243957	neither	NA	NA
Phc2	1	0.149074903997221	0.410345590471405	0.0532176286984209	0.801516539894484	neither	NA	NA
Phf1	1	0.0305714830683583	0.905161210807071	0.0183070233092933	0.940870700806171	neither	NA	NA
Phf12	1	0.0205660952447025	0.935450184124487	0.0485142603287718	0.787425285902247	neither	NA	NA
Phf24	1	-0.275318538653442	0.0502288732178663	-0.0686989348788867	0.730321012554845	neither	NA	NA
Phf3	1	-0.160421906470404	0.380721763121101	-0.0201067161897363	0.933814631323771	neither	NA	NA
Phkg2	1	0.0675681354457983	0.74797720291005	0.100237552358099	0.584907938913705	neither	NA	NA
Phlpp2	1	-0.570980753379887	1.54502565330291e-7	-0.274979622299572	0.0324672334684895	both	NA	0.0059243516412642
Phpt1	1	0.058791784911086	0.795738228099223	0.0671863388380891	0.739367466599564	neither	NA	NA
Phrf1	1	-0.0187550654240658	0.942394047648821	0.00372108481313355	0.988646864265742	neither	NA	NA
Phtf1	1	-0.145320297856682	0.450412213239735	-0.0812012739787763	0.687903797660843	neither	NA	NA
Phyhip	1	-0.029021294887627	0.909145621501045	0.0197288381570124	0.934053814584522	neither	NA	NA
Pi4k2a	1	-0.123882728698092	0.468067686930782	-0.0170111373727392	0.946637391000105	neither	NA	NA
Pi4ka	1	-0.0500257789050721	0.840048535195657	0.042193162056128	0.841594034675942	neither	NA	NA
Pi4kb	1	0.0145139918089467	0.956832077378999	0.0724011556405423	0.706037623668845	neither	NA	NA
Pias4	1	-0.21593288557324	0.210917960258408	-0.127399932822967	0.481406724700909	neither	NA	NA
Pick1	1	-0.121882003901622	0.528524024256983	-0.0380000214708581	0.864987464519173	neither	NA	NA
Pigk	1	-0.179516526250724	0.176900257992637	-0.0963699355330934	0.596182539222813	neither	NA	NA
Pigz	1	-0.0437477088494877	0.865258165679256	-0.013614117038492	0.956966855049204	neither	NA	NA
Pik3c3	1	-0.305411773371446	0.0376584167297793	-0.139271111843117	0.427490191152343	FFI	NA	NA
Pik3cb	1	-0.29974817736232	0.0563065891116504	-0.123960670835758	0.500349501678606	neither	NA	NA
Pik3ip1	1	-0.0222171477752164	0.932060461569898	0.00691510597599329	0.979509828543731	neither	NA	NA
Pik3r2	1	-0.0342879101704988	0.892430268343147	0.00515927291033034	0.985475997049897	neither	NA	NA
Pik3r4	1	-0.0886156615730625	0.690231021165361	0.0309442979666979	0.883926687316524	neither	NA	NA
Pim2	1	0.0430040323678238	0.863761920932049	0.0423802435902808	0.83728132526636	neither	NA	NA
Pink1	1	0.0585785604097384	0.767383766028521	0.0191898213603274	0.937404639140056	neither	NA	NA
Pip4k2b	1	-0.195154189308609	0.163485191642449	-0.0756049220671975	0.703617579217403	neither	NA	0.0042589094524287
Pip4k2c	1	-0.0860652667612688	0.655484626497551	-0.0151028691449504	0.954343270542037	neither	NA	NA
Pip5k1a	1	-0.121479240764996	0.508854201184447	-0.0174615269652805	0.944805035392901	neither	NA	NA
Pip5k1c	1	-0.0662997985887294	0.768036438690709	0.0163860943221265	0.948264539710235	neither	NA	NA
Pisd	1	-0.0351860959259637	0.881916445759712	0.00988054528658386	0.97133623661152	neither	NA	NA
Pitpna	1	0.0407550757543615	0.840481033215942	0.0423944477727094	0.83728132526636	neither	NA	NA
Pitpnm1	1	-0.0246341048319413	0.925808459617148	0.0583219237650384	0.760690372248874	neither	NA	NA
Pitpnm2	1	-0.265614281561951	0.115828812499808	-0.0359666408714777	0.873350962702682	neither	NA	NA
Pitpnm3	1	-0.255066361281062	0.14224417498284	-0.108938164842673	0.569317277427746	neither	NA	NA
Pitrm1	1	-0.166871986140786	0.345758057110413	0.0466328178707768	0.822389531290757	neither	NA	NA
Pkd1	1	-0.247429405808656	0.170043762392554	-0.0240834800982652	0.908786994119934	neither	NA	NA
Pkm	1	-0.112732122072047	0.584653702660636	-0.0273687514903292	0.906265843812897	neither	NA	NA
Pkn1	1	-0.14900108701411	0.451686451926102	-0.018788689907639	0.933155734290414	neither	NA	NA
Pkp4	1	0.153883392423828	0.385802263944204	0.00651727277270446	0.980532290103812	neither	NA	NA
Pla2g4e	1	-0.354651870981198	0.0278870662426456	-0.13055709436084	0.457718063173878	FFI	NA	NA
Pla2g6	1	-0.105713893401765	0.622905008688756	-0.0389918326923593	0.852056993581413	neither	NA	NA
Plbd2	1	-0.0194815971962705	0.934236344966659	0.0162759677181428	0.948264539710235	neither	NA	NA
Plcb3	1	-0.00483931262432108	0.985852135593681	-0.0255657203304849	0.906120174209597	neither	NA	NA
Plcd3	1	-0.20891612954251	0.259858026325159	-0.0452146145496789	0.824441902982611	neither	NA	NA
Plcd4	1	-0.146786764910029	0.449248862524625	0.050206841280232103	0.757306700570043	neither	NA	NA
Plcg1	1	-0.1729718959958	0.372668561460017	0.00354623872772246	0.988646864265742	neither	NA	NA
Plch2	1	-0.157391176764266	0.424367153220511	-0.0533554299767457	0.786458686454233	neither	NA	NA
Plcl2	1	-0.151309233822165	0.380478079733734	-0.030522299456925	0.895543533852103	neither	NA	NA
Plec	1	-0.224849862483873	0.221550782989621	-0.049947601968922	0.782371222143171	neither	NA	NA
Plekha5	1	-0.185995484265287	0.325140137805995	-0.011113089110176	0.960785033388585	neither	NA	NA
Plekha6	1	-0.305370343137861	0.058891476068772	-0.125836854804617	0.456819533183128	neither	NA	NA
Plekha7	1	-0.23722528084041	0.190013393241992	-0.131614216475201	0.457718063173878	neither	NA	NA
Plekhg5	1	-0.0415359211951549	0.873037629866768	0.0244119896506868	0.91715980744294	neither	NA	NA
Plekhm2	1	0.0224956257202075	0.932060461569898	0.0218474644416414	0.926804112037979	neither	NA	NA
Plekhm3	1	-0.403106129893128	0.0127931248503535	-0.237708536044542	0.137326302283023	FFI	NA	NA
Plekhn1	1	-0.107887133600111	0.600276935834767	0.0137913640959792	0.954902124601678	neither	NA	NA
Plk2	1	-0.208358650269393	0.136651889184957	-0.0930816253332149	0.625458699427449	neither	NA	NA
Plk5	1	-0.145738811295156	0.465009348133866	0.0202266844959789	0.933383451134425	neither	NA	NA
Plod3	1	-0.00333645316471162	0.989273471530622	0.0651142334482326	0.719093779192116	neither	NA	NA
Plpp5	1	0.0207297154167186	0.935002020338068	0.0333994066989947	0.860067813751793	neither	NA	NA
Plppr3	1	-0.0936314912514599	0.666269736857053	-0.0555754307001585	0.788278413910481	neither	NA	NA
Plrg1	1	-0.0916416667036487	0.659822205814026	0.00126369445397244	0.996103333305243	neither	NA	NA
Pltp	1	-0.0746618581071573	0.741914545368732	0.132813527204765	0.44617107782458	neither	NA	NA
Plxna1	1	-0.244421481530541	0.146509217013521	-0.0944363853898316	0.633909943518142	neither	NA	NA
Plxna2	1	-0.306989395396144	0.059520900228051	-0.172920701767726	0.321319090638132	neither	NA	NA
Plxna3	1	-0.0310106495352832	0.905161210807071	0.035178798472811	0.823586267506736	neither	NA	NA
Plxna4	1	-0.348899959580115	0.010812395026578	-0.154435820401146	0.377148254858852	FFI	NA	NA
Plxnb1	1	-0.00122610566031018	0.995616862886672	0.0307795945157727	0.89605758871668	neither	NA	NA
Plxnb2	1	0.100917542380635	0.601335776509681	0.13154481506827	0.457718063173878	neither	NA	NA
Plxnd1	1	-0.160426859212135	0.412911114135423	0.10179579380735	0.578293573922639	neither	NA	NA
Pmpca	1	-0.138468012050512	0.360093843120275	-0.0194229980525249	0.93655455583483	neither	NA	NA
Pmpcb	1	-0.232640589335307	0.0748378183153264	-0.0832543578609375	0.671589461138039	neither	NA	NA
Pnck	1	-0.0157622447138352	0.950199165650009	0.0558262103151224	0.786608169756429	neither	NA	NA
Pnkd	1	-0.0715553028863928	0.717164749237816	-0.0306717963369535	0.897739547273373	neither	NA	NA
Pnma3	1	-0.113602422251976	0.577452551791295	0.00354124779085443	0.98916167501199	neither	NA	NA
Pnmal1	1	0.0517468191605774	0.789547227308599	-0.0102560403382144	0.97012419076008	neither	NA	NA
Pnmal2	1	-0.135354276783204	0.493612960650263	-0.0299168292404062	0.899273372592282	neither	NA	NA
Pnpla6	1	-0.0375382603448212	0.885817129594498	-0.0134809943066781	0.957825379329505	neither	NA	NA
Pofut2	1	0.104535294817255	0.619400134058439	0.0376287410360341	0.861462671815493	neither	NA	NA
Poldip2	1	0.0900384288137912	0.656376913953248	0.0364828772074623	0.874943974324821	neither	NA	NA
Polg	1	0.0585639200011657	0.808440165060744	0.080779356275392	0.682805176673992	neither	NA	NA
Polr1a	1	-0.335701390650276	0.0579869670312525	-0.272483463398597	0.0903456715899701	neither	NA	NA
Polr1c	1	-0.124453957270537	0.539976356100956	-0.0385419018884328	0.861462671815493	neither	NA	NA
Polr2a	1	-0.525513446753481	8.01059095388375e-4	-0.28451621351773	0.0630127059689716	FFI	NA	NA
Polr2b	1	-0.372039798733938	0.0214559190267418	-0.0691402235484117	0.715504737539244	FFI	NA	NA
Polr3a	1	-0.144729913688993	0.473268870151819	-0.00749499280634434	0.972653924239944	neither	NA	NA
Polr3c	1	0.0348546374966229	0.893206278800007	0.0355957834669457	0.85765007688304	neither	NA	NA
Polr3e	1	-0.23177792729911	0.199539227157209	-0.166880583448055	0.336793228644216	neither	NA	NA
Polr3h	1	0.0224245031082212	0.928243129784319	0.056175629817178	0.782371222143171	neither	NA	NA
Polrmt	1	-0.0699351444468376	0.764197035231659	-0.0360988521862712	0.852056993581413	neither	NA	NA
Pom121	1	-0.203667563644061	0.218805858108434	-0.0562511230959649	0.782371222143171	neither	NA	NA
Por	1	-0.0637415591457779	0.776735614734589	-0.0479023154159161	0.822441076215146	neither	NA	NA
Pou6f1	1	-0.0872470513119239	0.659204555358104	-0.0347632632404672	0.88121727349591	neither	NA	NA
Ppan	1	0.126957835978284	0.536812218177553	0.0747219909672998	0.687903797660843	neither	NA	NA
Ppcdc	1	-0.107317946495833	0.617556167285135	-0.112552031365236	0.533244554249017	neither	NA	NA
Ppfia3	1	-0.0933738487328272	0.670375808330738	-0.00265687820787965	0.991753002578563	neither	NA	NA
Ppfia4	1	-0.0450428769586096	0.860523870965833	0.0315251453267236	0.881890248681962	neither	NA	NA
Ppil2	1	-0.0395671751366404	0.874198013595482	-0.0238657014387568	0.922452404962941	neither	NA	NA
Ppip5k1	1	-0.452361355035125	0.00375516378793674	-0.162425224231524	0.341025078597478	FFI	NA	NA
Ppm1a	1	-0.0799677489662622	0.651508751464978	-0.0126211528042358	0.962750984589072	neither	NA	NA
Ppm1f	1	-0.205509856228584	0.23049265626785	-0.0609300439317931	0.760690372248874	neither	NA	NA
Ppm1g	1	0.1001335349067	0.634651110330245	0.10880371866353	0.569997540061643	neither	NA	NA
Ppm1h	1	-0.205000756274471	0.219646843649629	-0.0835592985843776	0.677555598588587	neither	NA	NA
Ppm1l	1	-0.204433394312662	0.185274081474587	-0.0507763786560226	0.809911158244604	neither	NA	NA
Ppme1	1	0.0367901399218927	0.881943936008848	0.0159357612340997	0.949106915655654	neither	NA	NA
Ppox	1	-0.105209288853938	0.625708796992827	0.00323760821297653	0.9875393354542	neither	NA	NA
Ppp1r12b	1	-0.205230471645664	0.257362316886017	-0.160655147942756	0.345384989404023	neither	NA	NA
Ppp1r13b	1	0.035504016782754	0.888111718091387	0.00408365976880704	0.988258776932007	neither	NA	NA
Ppp1r16a	1	0.0927384886238696	0.666303906782748	0.0401311688592649	0.852056993581413	neither	NA	NA
Ppp1r16b	1	-0.0902939449778328	0.664084413004789	-0.0216613835838421	0.931690929175096	neither	NA	NA
Ppp1r26	1	-0.259963547479067	0.123617032219886	-0.114827717443172	0.546653862017158	neither	NA	NA
Ppp1r37	1	0.00890964212158505	0.975304046876849	0.0246787015569065	0.916225268512635	neither	NA	NA
Ppp1r9b	1	-0.0334904767815326	0.898272109322578	0.0010377505051154	0.996900766144588	neither	NA	NA
Ppp2r2c	1	-0.135955094877546	0.382544084876143	-0.0806397151501866	0.678670606263673	neither	NA	NA
Ppp2r2d	1	0.0388976865467549	0.840048535195657	0.0366360667722503	0.874070446324065	neither	NA	NA
Ppp2r3d	1	-0.00955196025068991	0.973050301405475	0.0727386947575607	0.707336516901069	neither	NA	NA
Ppp2r5b	1	0.0651458160471981	0.775100256269768	0.0513553388163276	0.80533137124783	neither	NA	NA
Ppp4c	1	0.179177474353119	0.345603009265822	0.148749507044327	0.349170388537413	neither	NA	NA
Ppp4r3a	1	-0.0937141029367331	0.668486457006905	0.0339338733397464	0.870725713907031	neither	NA	NA
Ppp4r3b	1	-0.0646542128430495	0.781157088344932	0.0650631195078772	0.728208850387138	neither	NA	NA
Ppp5c	1	-0.00277300356451727	0.990276210184659	0.0378465575761226	0.868253828947125	neither	NA	NA
Ppp6r1	1	-0.119561353722573	0.552111681899679	-0.00246642336945448	0.99274073293735	neither	NA	NA
Ppp6r2	1	-0.112983238751586	0.56803868737433	0.0500328748324518	0.814295191612407	neither	NA	NA
Ppp6r3	1	-0.159479058122217	0.386865200009195	0.0239476976703665	0.92322783816588	neither	NA	NA
Pprc1	1	-0.210832083844296	0.25647142201352	0.0296189510339701	0.885332578264881	neither	NA	NA
Ppt2	1	0.042027483776451303	0.870401867724974	0.0407048114514032	0.831082758959874	neither	NA	NA
Prcc	1	0.134312799700819	0.501207473104282	0.0536262014857835	0.787425285902247	neither	NA	NA
Prdm2	1	-0.203300928715525	0.276234941269752	-0.148143750558038	0.399080045302132	neither	NA	NA
Preb	1	0.0257553538713908	0.919301320633222	-0.0125517965022874	0.96161810460313	neither	NA	NA
Prepl	1	-0.433665174614409	1.90468623207436e-4	-0.263665892749872	0.0487973315294846	both	NA	NA
Prex1	1	0.0638160518734545	0.769915544295606	0.055105667597885	0.792835644565324	neither	NA	NA
Prickle1	1	-0.160634232630619	0.354406244629153	-0.0446776343821164	0.83121056998035	neither	NA	NA
Prickle2	1	-0.258410393332035	0.10615027772613	-0.111577100596303	0.556453676429893	neither	NA	NA
Prkaca	1	0.0112651394386342	0.964885082046292	0.0280982239471893	0.905936478126326	neither	NA	NA
Prkag2	1	0.0471856631144725	0.830371790550155	0.0398920122744436	0.858180473514111	neither	NA	NA
Prkar1b	1	0.0978758539031749	0.634523966900824	0.0699784646872746	0.72320757598774	neither	NA	NA
Prkcd	1	-0.0927497713177341	0.655484626497551	0.0187969575397607	0.939123319879904	neither	NA	NA
Prkcg	1	-0.117518823207419	0.561973367604019	-0.035110347377899	0.877787796543643	neither	NA	NA
Prkcz	1	0.107882915533457	0.588531143325073	0.0446263664187263	0.830371247986955	neither	NA	NA
Prmt1	1	-0.0650123203013674	0.768512620060848	-0.00441135265164492	0.987992780049716	neither	NA	NA
Prmt2	1	0.00504818778132688	0.984406129616355	-0.0122862144236283	0.963611004643298	neither	NA	NA
Prmt5	1	-0.0636030595405725	0.789008060257317	-0.00193666658219455	0.99391926535343	neither	NA	NA
Prmt7	1	-0.168000436770115	0.380320929315516	-0.0307195834123393	0.895543533852103	neither	NA	NA
Prmt8	1	-0.0450200513639199	0.832502679774595	0.0531608454178979	0.802128113489335	neither	NA	NA
Prpf19	1	-0.0824306368059544	0.68149124053495	-0.016840434470668	0.947078002047912	neither	NA	NA
Prpf40b	1	0.0778593321236656	0.731050278739521	0.00739001947995993	0.976713871158673	neither	NA	NA
Prpf6	1	-0.0950871806771118	0.635016336920461	-0.0308816174900087	0.897739547273373	neither	NA	NA
Prpf8	1	-0.589682930096875	5.73921434580743e-4	-0.241722097954255	0.13138374541724	FFI	NA	NA
Prpsap1	1	0.16541621121397	0.387607586451959	0.101945298625756	0.586976659791249	neither	NA	NA
Prr12	1	-0.0799712774669548	0.725926402834262	0.00238644482682105	0.992122109681393	neither	NA	NA
Prr14	1	-0.0965117856540799	0.657105319171035	-0.0521891118287919	0.774930846127118	neither	NA	NA
Prrc2a	1	0.0647491058824943	0.785356556395201	0.0817068931051449	0.66820000242873	neither	NA	NA
Prrc2b	1	-0.497295301963829	3.27792374400713e-5	-0.305897577786276	0.0147554331211815	both	NA	NA
Prxl2b	1	0.110637175567842	0.604966509721965	0.084260093611586	0.648490874403844	neither	NA	NA
Psd	1	0.0667268361788175	0.764116393251867	0.0477258111121444	0.823212303924187	neither	NA	NA
Psma4	1	0.0246997177586954	0.905245480587352	0.107922814581711	0.531176410074827	neither	NA	NA
Psma5	1	-0.0647114270379894	0.737401351191063	0.0180855937557146	0.942542547211382	neither	NA	NA
Psma7	1	0.117087925947216	0.482100609657858	0.0649957917581066	0.737319301993327	neither	NA	NA
Psmc1	1	0.0509710406626738	0.833746069884627	0.0854592589335292	0.660221512537477	neither	NA	NA
Psmc2	1	-0.010792351273333	0.965667682989931	0.00365859809417752	0.98916167501199	neither	NA	NA
Psmc3	1	0.0775155117786167	0.725926402834262	0.0696013527485698	0.721157591060328	neither	NA	NA
Psmc4	1	-0.0426453058420641	0.856428553374614	0.0287904964077968	0.903583231840978	neither	NA	NA
Psmc5	1	0.0723829200526087	0.748027824172466	0.0888034998412306	0.65398602896111	neither	NA	NA
Psmc6	1	0.0109007359486219	0.966071652440479	8.49762863120255e-4	0.997507782809674	neither	NA	NA
Psmd1	1	-0.10075574210851	0.557917250801222	-0.0241279352507437	0.92310962039781	neither	NA	NA
Psmd12	1	0.01539648849694	0.943543570359627	0.00209592753343128	0.99391926535343	neither	NA	NA
Psmd2	1	-0.0734475128420317	0.748043968087926	0.0691514551992698	0.710512500799913	neither	NA	NA
Psmd7	1	0.12835914414546	0.50602557492732	0.0590683981219536	0.772498861760282	neither	NA	NA
Psme3ip1	1	0.0748244796467967	0.745243932908993	-0.0529919392145236	0.802128113489335	neither	NA	NA
Psmf1	1	-0.0370125799653392	0.877329851113683	0.0260410885210818	0.912226967069883	neither	NA	NA
Pspc1	1	-0.148914869605248	0.447226540124699	-0.148387272093376	0.404662600420667	neither	NA	NA
Ptbp1	1	0.143526553460901	0.462676110557515	0.0600291192612496	0.731902250093011	neither	NA	NA
Ptcd3	1	-0.0210443550563749	0.928243129784319	0.0621271553736511	0.754428467997561	neither	NA	NA
Ptk2	1	-0.204660756770004	0.17600154714059	0.0236535861085262	0.920880814660667	neither	NA	NA
Ptk2b	1	-0.0398094360768471	0.874409145852545	0.049175998931065	0.814726762797853	neither	NA	NA
Ptpn11	1	-0.211552965270013	0.143686532418252	-0.171073773339321	0.183849507160098	neither	NA	NA
Ptpn23	1	0.115672610599807	0.56936679587542	0.0699317211019095	0.648120087087143	neither	NA	NA
Ptpn5	1	0.049679239141504	0.825837028549542	0.0308284349936704	0.897739547273373	neither	NA	NA
Ptpra	1	-0.0214764850693612	0.920725171557234	-2.98338122709001e-4	0.999106253008769	neither	NA	NA
Ptprf	1	-0.288359913796551	0.0565090768198166	-0.103664326855707	0.590597232939173	neither	NA	0.007341194056008705
Ptprm	1	-0.324407646764961	0.0389409009952754	-0.3213943226164	0.0253068738039755	both	NA	NA
Ptprn2	1	-0.217454958602373	0.21244427357916	-0.144171029025937	0.420672278695919	neither	NA	NA
Ptpru	1	-0.079405442459018	0.717905394006737	-0.0781446414985951	0.671003602305416	neither	NA	NA
Pum3	1	0.0660870423455897	0.763156598170827	0.00113178068885004	0.996891834278888	neither	NA	NA
Pus1	1	-0.0313985680399913	0.900405447359156	-0.0156996943420952	0.951154641390782	neither	NA	NA
Pwp2	1	-0.250162612250753	0.154651817859186	-0.103333470704917	0.588671929377967	neither	NA	NA
Pwwp3a	1	-0.00279081726113972	0.990914511122825	0.03105245846122	0.8868005207615	neither	NA	NA
Pxk	1	-0.267286306331455	0.0774473161232712	-0.134743643605423	0.441145006182445	neither	NA	NA
Pycr2	1	-0.00523423604870644	0.984843701263956	-0.00581993302381189	0.981136435253748	neither	NA	NA
Pygb	1	-0.19191420012372	0.262618694283678	-0.0872263774958421	0.663404346617164	neither	NA	NA
Qars	1	0.0501164335069936	0.839698100450383	0.0421712662868099	0.843926505150927	neither	NA	NA
Qrich1	1	0.113920138356238	0.542302729125123	0.111391840962863	0.553459046493992	neither	NA	NA
Qrsl1	1	-0.159244009986374	0.380478079733734	-0.0479212242633712	0.815287767434047	neither	NA	NA
Qsox1	1	-0.14532910269711	0.409589140017929	-0.0583283350200029	0.776951086834151	neither	NA	NA
Qtrt1	1	0.0871995219219609	0.692951645025716	0.0696125678064508	0.675201327694637	neither	NA	NA
R3hcc1	1	-0.115374318461022	0.532411130695677	-0.0514569320093602	0.809267439454413	neither	NA	NA
Rab11a	1	-0.176384237759817	0.352481466632552	0.00154188905467792	0.99497596587917	neither	NA	NA
Rab11fip3	1	-0.291651318877777	0.0860058331280074	-0.0895657565631509	0.650291440844058	neither	NA	NA
Rab11fip4	1	-0.294197108175629	0.0709428785340329	-0.0921715343454527	0.643646454356982	neither	NA	NA
Rab11fip5	1	0.0202880441482002	0.935685673413048	0.0580223000064124	0.774930846127118	neither	NA	NA
Rab15	1	-0.0636004155088659	0.776872229449603	-0.0508568886155641	0.81165256886331	neither	NA	NA
Rab26	1	0.040697121916811	0.872931965412031	0.0528070598386983	0.790896329956406	neither	NA	NA
Rab33a	1	-0.0645506299491154	0.763156598170827	-0.00967704352279555	0.97133623661152	neither	NA	NA
Rab35	1	0.0600330938875463	0.766315506754767	0.0429767559246242	0.842407055009096	neither	NA	NA
Rab3gap1	1	-0.248845085815895	0.152694203525547	-0.0176425806248554	0.937413062161282	neither	NA	NA
Rab3gap2	1	-0.353755371420328	0.0208624548448745	-0.12941981033532	0.472715358442725	FFI	NA	NA
Rab4a	1	0.0454708288991416	0.83371670519452	0.0739969320241906	0.707382035824609	neither	NA	NA
Rab5b	1	-0.00850266243692962	0.970438847999454	-0.0285225715488102	0.904695535180467	neither	NA	NA
Rab5c	1	0.00122189333402678	0.99465373756054	-0.00285871944299456	0.991933092758856	neither	NA	NA
Rab6b	1	-0.124381130658654	0.402241587371534	-0.0497318898429667	0.813057374269893	neither	NA	NA
Rab8a	1	-0.040937486928077	0.874141975755496	-0.0212164437815119	0.929614225928414	neither	NA	NA
Rabggta	1	-0.18280870271412	0.290250936047089	-0.0411058008350278	0.851460301096287	neither	NA	NA
Rabl2	1	-0.141003556274604	0.486926984298507	-0.0330192299043191	0.872656556088139	neither	NA	NA
Rabl6	1	-0.149318590792716	0.449248862524625	-0.02730549669454	0.905715567191216	neither	NA	NA
Rad51d	1	-0.00639872901202519	0.98194042074501	-0.0281501006116882	0.903589519729848	neither	NA	NA
Rae1	1	-0.156200060588911	0.380708145161913	-0.0291639068066182	0.901499567476902	neither	NA	NA
Raf1	1	0.026016093234365	0.921529208665198	0.0261895656186589	0.909906819116789	neither	NA	NA
Rai1	1	-0.0910534624949986	0.669639673255024	0.020022619771909	0.93448596819558	neither	NA	NA
Ralbp1	1	0.00570272050679921	0.982295019274225	-0.0266622935367768	0.912226967069883	neither	NA	NA
Ralgapa1	1	-0.256763142654925	0.14050652229884	-0.0569624180226799	0.776344415747639	neither	NA	NA
Ralgapb	1	-0.378775599205597	0.00206497429942634	-0.172333098690518	0.223456391261923	FFI	NA	0.004945227375195023
Ralgds	1	0.0523488093425727	0.832545011221587	0.0566083494016386	0.774930846127118	neither	NA	NA
Ran	1	-0.0426050130101959	0.869890783054411	-0.0210690533370197	0.927480183993695	neither	NA	NA
Ranbp3	1	0.0204206386213048	0.935685673413048	0.0204058563032815	0.933383451134425	neither	NA	NA
Rangap1	1	-0.0649690224943896	0.778110485074402	-0.0361538440612042	0.874070446324065	neither	NA	NA
Rap1gap2	1	-0.382744556384866	0.00496547067233507	-0.0997897304973313	0.607005455776726	FFI	NA	NA
Rapgef1	1	-0.173660431609317	0.356213865405375	-0.0271788071075101	0.907340358165108	neither	NA	NA
Rapgef3	1	-0.0842945791500353	0.707596505693558	-0.0236978949776287	0.917073693639693	neither	NA	NA
Rapgef6	1	-0.333109830621405	0.059692108536765	-0.0725188186292891	0.671208453715072	neither	NA	NA
Rapgefl1	1	-0.0936964202117074	0.640699367493658	0.0185943691840472	0.93991865892058	neither	NA	NA
Rars	1	-0.00946186781899643	0.973050301405475	0.0180728072357243	0.939450631503694	neither	NA	NA
Rasa3	1	-0.0113045761597764	0.965502545994573	0.0395336831943814	0.858141456753626	neither	NA	NA
Rasal1	1	0.0155617987129252	0.95366315050625	0.0705525409589161	0.709735990356971	neither	NA	NA
Rasd2	1	-0.0232954811304752	0.919407099152246	0.0121092014812587	0.964052935587975	neither	NA	NA
Rasgrf1	1	-0.426640954487547	0.00205321076346341	-0.137293852998764	0.435454431873991	FFI	NA	NA
[truncated: 4,962 more rows]

## Sheet: Edgelist_SST
from	to	weight
COX1	ATP6	0.8461538
COX1	ATP8	0.8945055
ATP6	ATP8	0.9208791
COX1	ND1	0.978022
ATP6	ND1	0.8725275
ND1	COX3	0.8241758
ATP8	ND1	0.9164835
COX1	ND4	0.9340659
ATP6	ND4	0.8813187
COX3	ND4	0.8549451
ATP8	ND4	0.9296703
ND1	ND4	0.9692308
COX1	CYTB	0.9032967
ATP6	CYTB	0.8417582
COX3	CYTB	0.8461538
ATP8	CYTB	0.8549451
ND1	CYTB	0.9296703
ND4	CYTB	0.9604396
COX1	ND2	0.9252747
ATP6	ND2	0.8549451
ND2	Gabrg2	0.8241758
COX3	ND2	0.8285714
ATP8	ND2	0.9208791
ND1	ND2	0.9472527
ND4	ND2	0.9736264
CYTB	ND2	0.9604396
Sst	Npy	0.9296703
Aldoa	Atp1a3	0.8681319
Sptan1	Golga4	0.8417582
Aldoa	Hspa8	0.8241758
Atp1a3	Hspa8	0.8989011
Aldoa	Syp	0.8417582
Hspa8	Syp	0.8505495
Snap25	Atp1b1	0.9692308
ATP6	Nptn	0.8373626
ATP8	Nptn	0.8769231
ND1	Nptn	0.8373626
Snap25	Nptn	0.8901099
ND4	Nptn	0.832967
ND2	Nptn	0.9032967
Atp1b1	Nptn	0.832967
ND1	ND4L	0.832967
Snap25	ND4L	0.8681319
ND4	ND4L	0.8813187
CYTB	ND4L	0.8769231
ND2	ND4L	0.9120879
Nptn	ND4L	0.8813187
Atp5b	Rpl13a	0.8373626
Rpl13a	Tmsb10	0.8417582
Syp	Pkm	0.8945055
Sst	Ubb	0.8373626
Atp1a3	Ubb	0.8461538
Hspa8	Ubb	0.8725275
Snap25	Zwint	0.8901099
Atp1b1	Zwint	0.9076923
Rps27	Rps29	0.8241758
Syp	Hsp90ab1	0.832967
Pkm	Hsp90ab1	0.8593407
Hsp90ab1	Tubb2a	0.8505495
Gabrg2	Atp5md	0.8813187
ND1	Atp5md	0.8417582
Snap25	Atp5md	0.832967
ND4	Atp5md	0.8549451
ND2	Atp5md	0.8813187
Nptn	Atp5md	0.8241758
ND4L	Atp5md	0.8813187
Ppia	Uchl1	0.8241758
Tmsb10	Rpl38	0.8549451
Rpl13a	Rpl38	0.8681319
Rps27	Rpl38	0.8857143
Sptan1	Eef1a1	0.8593407
Golga4	Eef1a1	0.8769231
Dnm1	Cplx2	0.8285714
Cplx2	Camk2a	0.9296703
Syp	Tuba1b	0.8241758
Tuba1b	Tuba1a	0.8637363
Rps27	Rps15	0.8241758
Rps29	Rps15	0.9296703
Gabrg2	Nap1l5	0.8461538
Zwint	Nap1l5	0.8989011
COX1	ND5	0.832967
ATP6	ND5	0.832967
ATP8	ND5	0.8241758
ND1	ND5	0.8813187
ND4	ND5	0.9296703
CYTB	ND5	0.9340659
ND2	ND5	0.9340659
Nptn	ND5	0.8505495
ND4L	ND5	0.9296703
Tubb2a	Hsp90aa1	0.8417582
Tuba1a	Hsp90aa1	0.832967
Hsp90ab1	Hsp90aa1	0.9032967
Tuba1b	Hsp90aa1	0.8725275
Syp	Ap2m1	0.8505495
Pkm	Ap2m1	0.8593407
Tubb2a	Ap2m1	0.8285714
Snap25	Gpm6a	0.8901099
ND2	Gpm6a	0.8417582
Atp1b1	Gpm6a	0.8593407
Nptn	Gpm6a	0.9076923
ND4L	Gpm6a	0.9032967
Zwint	Gpm6a	0.832967
Atp5md	Gpm6a	0.832967
Nap1l5	Gpm6a	0.832967
ND5	Gpm6a	0.8285714
Syp	Calm3	0.8681319
Rps27	Selenow	0.9120879
Rps29	Selenow	0.8681319
Rpl38	Selenow	0.832967
Rps15	Selenow	0.9208791
Calm2	Myl6	0.8989011
Myl6	Cox4i1	0.9428571
Myl6	Stmn3	0.8241758
Calm3	Myl6	0.8285714
Tmsb10	Stmn1	0.8945055
Uchl1	Stmn1	0.9076923
Gabrg2	Serinc1	0.9032967
Snap25	Serinc1	0.9516484
Atp1b1	Serinc1	0.9032967
Nptn	Serinc1	0.8857143
ND4L	Serinc1	0.8549451
Zwint	Serinc1	0.9120879
Atp5md	Serinc1	0.8945055
Nap1l5	Serinc1	0.8813187
Gpm6a	Serinc1	0.9076923
Rps27	Rpl26	0.9164835
Rps29	Rpl26	0.8945055
Rpl38	Rpl26	0.8813187
Rps15	Rpl26	0.9296703
Selenow	Rpl26	0.9384615
Rpl13a	Uqcrh	0.8285714
Cox4i1	Uqcrh	0.8241758
Rpl38	Uqcrh	0.8989011
Rpl26	Uqcrh	0.8461538
Dnm1	Chd3	0.8857143
Cplx2	Chd3	0.8593407
Atp5md	Atp5g3	0.8769231
Gabrg2	Tspyl4	0.8549451
Snap25	Tspyl4	0.9208791
Atp1b1	Tspyl4	0.8857143
Nptn	Tspyl4	0.8681319
ND4L	Tspyl4	0.8725275
Zwint	Tspyl4	0.8549451
Nap1l5	Tspyl4	0.9032967
Gpm6a	Tspyl4	0.9296703
Serinc1	Tspyl4	0.9340659
Tubb2a	Mdh1	0.8373626
Tuba1a	Mdh1	0.8813187
Cox5b	Cfl1	0.8285714
Sst	Eef1a2	0.8285714
Aldoa	Eef1a2	0.8637363
Atp1a3	Eef1a2	0.8945055
Hspa8	Eef1a2	0.8637363
Ubb	Eef1a2	0.9736264
Stmn3	Eef1a2	0.8285714
Snurf	Klc1	0.8813187
Pkm	Klc1	0.8373626
Dnm1	Klc1	0.8461538
Hsp90ab1	Klc1	0.8637363
Hsp90aa1	Klc1	0.8461538
Tmsb10	Fau	0.8461538
Rpl13a	Fau	0.8945055
Rps27	Fau	0.8637363
Rpl38	Fau	0.9516484
Selenow	Fau	0.8241758
Atp5b	Rpsa	0.9340659
Rpsa	Thy1	0.832967
Rpl13a	Rpsa	0.8813187
Rpl13a	Rpl19	0.8593407
Rps27	Rpl19	0.9208791
Rps29	Rpl19	0.8725275
Rpl38	Rpl19	0.9648352
Rps15	Rpl19	0.8593407
Selenow	Rpl19	0.9296703
Rpl26	Rpl19	0.9296703
Uqcrh	Rpl19	0.8857143
Fau	Rpl19	0.9296703
COX1	Ywhah	0.8417582
ATP6	Ywhah	0.8593407
Gabrg2	Ywhah	0.8373626
ATP8	Ywhah	0.8549451
ND1	Ywhah	0.8813187
Snap25	Ywhah	0.8637363
ND4	Ywhah	0.8857143
CYTB	Ywhah	0.8593407
ND2	Ywhah	0.8505495
Atp1b1	Ywhah	0.8241758
ND4L	Ywhah	0.8637363
Serinc1	Ywhah	0.832967
Atp5g3	Tspan7	0.8417582
Tspan7	Rtn1	0.9076923
Fau	Rpl41	0.832967
Cpe	Calm1	0.8417582
Calm1	Plp1	0.8593407
Tmsb10	Rab3a	0.8901099
Uchl1	Rab3a	0.8549451
Stmn1	Rab3a	0.8901099
Rpl26	Rps24	0.8373626
Rpl38	Sod1	0.8813187
Uqcrh	Sod1	0.9032967
Rpl19	Sod1	0.8593407
Gabrg2	Ndfip1	0.8637363
ND1	Ndfip1	0.8505495
Snap25	Ndfip1	0.8857143
Atp1b1	Ndfip1	0.832967
Nptn	Ndfip1	0.832967
ND4L	Ndfip1	0.8417582
Zwint	Ndfip1	0.8461538
Nap1l5	Ndfip1	0.9076923
Gpm6a	Ndfip1	0.8813187
Serinc1	Ndfip1	0.9208791
Tspyl4	Ndfip1	0.8813187
Ywhah	Ndfip1	0.9076923
Rps27	Uba52	0.8857143
Rps29	Uba52	0.9032967
Rpl38	Uba52	0.8681319
Rps15	Uba52	0.9648352
Selenow	Uba52	0.9208791
Rpl26	Uba52	0.9824176
Uqcrh	Uba52	0.8681319
Rpl19	Uba52	0.9120879
Rps24	Uba52	0.8241758
Stmn3	Tecr	0.9824176
Atp1a3	Psap	0.832967
Calm2	Psap	0.8725275
Ubb	Psap	0.8373626
Stmn3	Psap	0.8769231
Myl6	Psap	0.8901099
Eef1a2	Psap	0.8549451
Atp5b	Gnb2	0.832967
Thy1	Gnb2	0.8285714
Dnm1	Gpi1	0.8241758
Rab3a	Gpi1	0.8945055
Gnb2	Gpi1	0.8989011
Uqcrh	Atp5k	0.8241758
Sod1	Atp5k	0.8901099
Calm2	Cox6b1	0.8769231
Cox4i1	Cox6b1	0.9472527
Myl6	Cox6b1	0.9736264
Psap	Cox6b1	0.9076923
Atp6v0c	Cox6a1	0.8549451
Myl6	Cox6a1	0.8725275
Psap	Cox6a1	0.832967
Cox6b1	Cox6a1	0.8461538
Rps15	Vamp2	0.9032967
Selenow	Vamp2	0.8461538
Myl6	Vamp2	0.8241758
Rpl26	Vamp2	0.8505495
Uba52	Vamp2	0.8901099
Cox6a1	Vamp2	0.8681319
Cox4i1	Atp5h	0.8505495
Sod1	Atp5h	0.8637363
Vamp2	Atp5h	0.832967
Mbp	Mobp	0.9296703
Atp5g3	Cox6c	0.8813187
Gabrg2	Vsnl1	0.9120879
Snap25	Vsnl1	0.8813187
Nptn	Vsnl1	0.8417582
Zwint	Vsnl1	0.8637363
Nap1l5	Vsnl1	0.9252747
Gpm6a	Vsnl1	0.8373626
Serinc1	Vsnl1	0.9604396
Tspyl4	Vsnl1	0.9032967
Ywhah	Vsnl1	0.832967
Ndfip1	Vsnl1	0.9340659
Actg1	Actb	0.8813187
Rps27	Rpl31	0.8725275
Rpl38	Rpl31	0.8285714
Rpl26	Rpl31	0.8725275
Uba52	Rpl31	0.8241758
ND4L	Eif4a2	0.8549451
Tspyl4	Eif4a2	0.9164835
Gnas	App	0.8505495
Rps29	Rps21	0.9208791
Rps15	Rps21	0.9032967
Rpl26	Rps21	0.8769231
Rpl19	Rps21	0.832967
Rps24	Rps21	0.8681319
Uba52	Rps21	0.8945055
Tubb4a	Ckmt1	0.8549451
Klc1	Ckmt1	0.8945055
Sst	Mif	0.8725275
Atp1a3	Mif	0.832967
Stmn3	Mif	0.832967
Eef1a2	Mif	0.8373626
Psap	Mif	0.9208791
Cox6a1	Mif	0.8813187
Syp	Tpi1	0.8593407
Ubb	Tpi1	0.8461538
Uchl1	Tpi1	0.8857143
Ap2m1	Tpi1	0.8285714
Stmn1	Tpi1	0.8637363
Rab3a	Tpi1	0.8417582
Syp	Tuba4a	0.8285714
Pkm	Tuba4a	0.8549451
Tuba1a	Tuba4a	0.8241758
Tubb4a	Tuba4a	0.8593407
Thy1	Ppp2r1a	0.8637363
Tmsb10	Ppp2r1a	0.9120879
Rpl13a	Ppp2r1a	0.832967
Cfl1	Ppp2r1a	0.8637363
Fau	Ppp2r1a	0.8901099
Rpl41	Ppp2r1a	0.8241758
Syp	Tubb3	0.8857143
Pkm	Tubb3	0.9208791
Tuba1a	Tubb3	0.8417582
Tubb4a	Tubb3	0.8769231
Tuba1b	Tubb3	0.8725275
Klc1	Tubb3	0.8461538
Tuba4a	Tubb3	0.9648352
Rps8	Mprip	0.8417582
ATP6	Gpm6b	0.8285714
Calm1	Gpm6b	0.9032967
Tmsb10	Cox7b	0.8901099
Ppp2r1a	Cox7b	0.9164835
Pkm	Eef2	0.8373626
Tubb4a	Eef2	0.9208791
Gpi1	Eef2	0.8373626
Tubb3	Eef2	0.8417582
Thy1	Rpl13	0.8241758
Fau	Rpl13	0.8637363
Rpl41	Rpl13	0.9164835
Rps8	Rpl13	0.9032967
Ppp2r1a	Rpl13	0.8681319
Tmsb10	Pebp1	0.8681319
Uchl1	Pebp1	0.8945055
Stmn1	Pebp1	0.9296703
Cfl1	Pebp1	0.8593407
Rab3a	Pebp1	0.832967
Sod1	Pebp1	0.8417582
Tpi1	Pebp1	0.8505495
Syp	Eno2	0.9076923
Pkm	Eno2	0.9296703
Uchl1	Eno2	0.8285714
Ap2m1	Eno2	0.8725275
Rab3a	Eno2	0.8549451
Gpi1	Eno2	0.8901099
Tpi1	Eno2	0.8769231
Tubb3	Eno2	0.8417582
Eef2	Eno2	0.8417582
Rpl13a	Ptgds	0.8417582
Fau	Ptgds	0.832967
Rpl31	Ptgds	0.8417582
Pkm	Ncdn	0.8725275
Eno2	Ncdn	0.8241758
Thy1	Chchd10	0.9340659
Tmsb10	Chchd10	0.8769231
Cox5b	Chchd10	0.8241758
Cfl1	Chchd10	0.8681319
Rpl41	Chchd10	0.8285714
Ppp2r1a	Chchd10	0.9208791
Cox7b	Chchd10	0.8373626
Rpl13	Chchd10	0.8241758
Pebp1	Chchd10	0.8813187
Atp5b	Rpl11	0.9032967
Rpl13a	Rpl11	0.9692308
Rpl38	Rpl11	0.8241758
Fau	Rpl11	0.832967
Rpsa	Rpl11	0.9340659
Tmsb10	Mtch1	0.8813187
Stmn1	Mtch1	0.8461538
Rab3a	Mtch1	0.9472527
Gnb2	Mtch1	0.832967
Gpi1	Mtch1	0.9252747
Eno2	Mtch1	0.8725275
Rpl11	Mtch1	0.8417582
Rpl13a	Rps11	0.8285714
Rps27	Rps11	0.9164835
Selenow	Rps11	0.8461538
Rpl26	Rps11	0.832967
Uqcrh	Rps11	0.8549451
Fau	Rps11	0.8241758
Rpl19	Rps11	0.8373626
Uba52	Rps11	0.8241758
Rpl31	Rps11	0.832967
Ptgds	Rps11	0.8637363
Rplp1	Apoe	0.8637363
Tmsb10	Atp5j2	0.8901099
Rpl38	Atp5j2	0.8901099
Cox5b	Atp5j2	0.8241758
Stmn1	Atp5j2	0.8285714
Cfl1	Atp5j2	0.8461538
Fau	Atp5j2	0.8725275
Rpl19	Atp5j2	0.832967
Rpl41	Atp5j2	0.8241758
Sod1	Atp5j2	0.8989011
Ppp2r1a	Atp5j2	0.8901099
Pebp1	Atp5j2	0.9340659
Chchd10	Atp5j2	0.9164835
Rpl13a	Rps25	0.8769231
Rps27	Rps25	0.9472527
Rpl38	Rps25	0.9428571
Selenow	Rps25	0.9032967
Rpl26	Rps25	0.8945055
Uqcrh	Rps25	0.8813187
Fau	Rps25	0.9472527
Rpl19	Rps25	0.9604396
Sod1	Rps25	0.8241758
Uba52	Rps25	0.8857143
Ptgds	Rps25	0.8373626
Rps11	Rps25	0.9164835
ND2	Ppp3r1	0.8241758
Cpe	Ppp3r1	0.8549451
Nptn	Ppp3r1	0.9120879
Nap1l5	Ppp3r1	0.8461538
ND5	Ppp3r1	0.832967
Gpm6a	Ppp3r1	0.9164835
Tspyl4	Ppp3r1	0.8901099
Calm1	Ppp3r1	0.8593407
Ndfip1	Ppp3r1	0.8241758
Eif4a2	Ppp3r1	0.832967
Gpm6b	Ppp3r1	0.8593407
Chchd10	Pcsk1n	0.8373626
Calm2	Uqcr10	0.8505495
Atp6v0c	Uqcr10	0.8725275
Myl6	Uqcr10	0.9076923
Cox6b1	Uqcr10	0.8681319
Cox6a1	Uqcr10	0.9340659
Vamp2	Uqcr10	0.8813187
Tmsb10	Ndufb9	0.9076923
Rpl13a	Ndufb9	0.9208791
Rpl38	Ndufb9	0.9340659
Uqcrh	Ndufb9	0.8285714
Fau	Ndufb9	0.9516484
Rpl19	Ndufb9	0.8681319
Ppp2r1a	Ndufb9	0.9296703
Cox7b	Ndufb9	0.8725275
Chchd10	Ndufb9	0.8549451
Rpl11	Ndufb9	0.8681319
Atp5j2	Ndufb9	0.9164835
Rps25	Ndufb9	0.8945055
Aldoa	Clstn1	0.8461538
Syp	Clstn1	0.8901099
Pkm	Clstn1	0.9340659
Tubb2a	Clstn1	0.8461538
Hsp90ab1	Clstn1	0.8945055
Ap2m1	Clstn1	0.8769231
Eno2	Clstn1	0.8637363
Ncdn	Clstn1	0.8769231
Rps27	Rps17	0.9252747
Rpl38	Rps17	0.8285714
Rps15	Rps17	0.8769231
Selenow	Rps17	0.9208791
Rpl26	Rps17	0.9120879
Uqcrh	Rps17	0.9032967
Rpl19	Rps17	0.8857143
Uba52	Rps17	0.9208791
Rps11	Rps17	0.9384615
Rps25	Rps17	0.9164835
Calm2	Bsg	0.8681319
Stmn3	Bsg	0.8505495
Myl6	Bsg	0.8637363
Sod1	Bsg	0.8637363
Psap	Bsg	0.8769231
Cox6b1	Bsg	0.8417582
Cox6a1	Bsg	0.9208791
Mif	Bsg	0.9208791
Uqcr10	Bsg	0.9076923
Tspan7	Atp5l	0.9164835
Tmsb10	Gpx4	0.8681319
Rpl13a	Gpx4	0.8681319
Rpl38	Gpx4	0.8461538
Rab3a	Gpx4	0.8505495
Ppp2r1a	Gpx4	0.8241758
Rpl11	Gpx4	0.8989011
Mtch1	Gpx4	0.8285714
Atp5j2	Gpx4	0.8461538
Ndufb9	Gpx4	0.8549451
Kif5a	Ddn	0.8769231
Dnm1	Ddn	0.8725275
Cplx2	Ddn	0.8549451
Chd3	Ddn	0.9340659
Ppia	Prdx5	0.8681319
Uchl1	Prdx5	0.8549451
Cfl1	Prdx5	0.8725275
Ppp2r1a	Prdx5	0.8505495
Pebp1	Prdx5	0.8681319
Chchd10	Prdx5	0.8945055
Atp5j2	Prdx5	0.8637363
Ndufb9	Prdx5	0.8461538
Snurf	Tcf25	0.8461538
Dnm1	Tcf25	0.9340659
Hsp90ab1	Tcf25	0.8637363
Hsp90aa1	Tcf25	0.8417582
Chd3	Tcf25	0.8285714
Klc1	Tcf25	0.8681319
Ddn	Tcf25	0.8461538
Eif4a2	Matr3	0.8857143
Matr3	Prkcb	0.8285714
Rps15	Rpl18a	0.8549451
Selenow	Rpl18a	0.8241758
Vamp2	Rpl18a	0.8901099
Uqcr10	Rpl18a	0.8989011
Snurf	Ndufa10	0.8285714
Klc1	Ndufa10	0.8681319
Ckmt1	Ndufa10	0.8725275
Tcf25	Ndufa10	0.8461538
Snap25	Atp6ap2	0.8769231
Atp1b1	Atp6ap2	0.9032967
ND4L	Atp6ap2	0.8373626
Zwint	Atp6ap2	0.8813187
Nap1l5	Atp6ap2	0.8857143
Gpm6a	Atp6ap2	0.9076923
Serinc1	Atp6ap2	0.8813187
Tspyl4	Atp6ap2	0.956044
Vsnl1	Atp6ap2	0.8417582
Eif4a2	Atp6ap2	0.8637363
Ppp3r1	Atp6ap2	0.8461538
COX1	Rtn3	0.8681319
ND1	Rtn3	0.8813187
ND4	Rtn3	0.8285714
CYTB	Rtn3	0.8417582
ND2	Rtn3	0.8637363
Nptn	Rtn3	0.8505495
ND4L	Rtn3	0.8681319
Atp5md	Rtn3	0.832967
ND5	Rtn3	0.8593407
Gpm6a	Rtn3	0.8637363
Serinc1	Rtn3	0.8549451
Ndfip1	Rtn3	0.8549451
Vsnl1	Rtn3	0.8285714
Gabrg2	Pfn2	0.8461538
Cpe	Pfn2	0.832967
Nptn	Pfn2	0.832967
Gpm6a	Pfn2	0.8681319
Serinc1	Pfn2	0.832967
Tspyl4	Pfn2	0.9340659
Calm1	Pfn2	0.8285714
Vsnl1	Pfn2	0.8285714
Eif4a2	Pfn2	0.9032967
Ppp3r1	Pfn2	0.8857143
Atp6ap2	Pfn2	0.8945055
Rpl38	Ndufb8	0.8725275
Uqcrh	Ndufb8	0.9076923
Fau	Ndufb8	0.8461538
Atp5j2	Ndufb8	0.8505495
Ndufb9	Ndufb8	0.8945055
Thy1	Prdx2	0.9032967
Tmsb10	Prdx2	0.8461538
Stmn1	Prdx2	0.8373626
Rab3a	Prdx2	0.8725275
Chchd10	Prdx2	0.8813187
Mtch1	Prdx2	0.8813187
Gpx4	Prdx2	0.8549451
Rpsa	Rps19	0.8549451
Rps8	Rps19	0.8549451
Ppp2r1a	Rps19	0.8373626
Rpl13	Rps19	0.8637363
Tmsb10	Ndufa3	0.8461538
Rpl38	Ndufa3	0.8945055
Cox5b	Ndufa3	0.8417582
Fau	Ndufa3	0.9120879
Rpl19	Ndufa3	0.8637363
Sod1	Ndufa3	0.8989011
Atp5h	Ndufa3	0.8417582
Ppp2r1a	Ndufa3	0.8373626
Pebp1	Ndufa3	0.8637363
Atp5j2	Ndufa3	0.9428571
Rps25	Ndufa3	0.8769231
Ndufb9	Ndufa3	0.8945055
Ndufb8	Ndufa3	0.832967
Tuba1a	Slc25a3	0.8241758
Rps27	Rps28	0.8241758
Rps29	Rps28	0.8681319
Rpl38	Rps28	0.8813187
Rpl26	Rps28	0.8505495
Fau	Rps28	0.8813187
Rpl19	Rps28	0.8901099
Uba52	Rps28	0.832967
Rpl31	Rps28	0.8285714
Rps21	Rps28	0.8681319
Rps25	Rps28	0.8505495
Cplx2	Ttc3	0.9164835
Camk2a	Ttc3	0.8681319
Ttc3	Ahdc1	0.8285714
Rpl38	Atpif1	0.8637363
Uqcrh	Atpif1	0.8945055
Sod1	Atpif1	0.9868132
Tecr	Atpif1	0.8241758
Atp5k	Atpif1	0.8901099
Atp5h	Atpif1	0.8725275
Pebp1	Atpif1	0.8681319
Atp5j2	Atpif1	0.9164835
Bsg	Atpif1	0.8813187
Ndufa3	Atpif1	0.8857143
Stmn3	Atp5o	0.8725275
Uqcrh	Atp5o	0.8593407
Sod1	Atp5o	0.9516484
Tecr	Atp5o	0.8857143
Atp5k	Atp5o	0.8637363
Atp5h	Atp5o	0.8637363
Pebp1	Atp5o	0.8637363
Atp5j2	Atp5o	0.8945055
Bsg	Atp5o	0.8901099
Ndufa3	Atp5o	0.8461538
Atpif1	Atp5o	0.9824176
Atp5h	Ndufa5	0.956044
Ndufb8	Ndufa5	0.8285714
Fau	Rpl37	0.8417582
Rpl41	Rpl37	0.8417582
Rps8	Rpl37	0.9032967
Rpl13	Rpl37	0.9648352
Rps19	Rpl37	0.8549451
Atp5b	Rpl28	0.8461538
Thy1	Rpl28	0.9604396
Tmsb10	Rpl28	0.8813187
Fau	Rpl28	0.8417582
Rpsa	Rpl28	0.8857143
Ppp2r1a	Rpl28	0.9384615
Cox7b	Rpl28	0.8725275
Rpl13	Rpl28	0.8857143
Chchd10	Rpl28	0.9516484
Atp5j2	Rpl28	0.8549451
Ndufb9	Rpl28	0.8945055
Prdx2	Rpl28	0.8813187
Rps19	Rpl28	0.8681319
Rpl37	Rpl28	0.8637363
Tmsb10	Uqcrq	0.8769231
Cox5b	Uqcrq	0.9164835
Ppp2r1a	Uqcrq	0.8549451
Cox7b	Uqcrq	0.8549451
Pebp1	Uqcrq	0.8285714
Chchd10	Uqcrq	0.9164835
Atp5j2	Uqcrq	0.9208791
Ndufb9	Uqcrq	0.8637363
Prdx5	Uqcrq	0.8637363
Ndufb8	Uqcrq	0.832967
Ndufa3	Uqcrq	0.8549451
Atpif1	Uqcrq	0.8285714
Atp5o	Uqcrq	0.8505495
Rpl28	Uqcrq	0.8461538
Rps15	Uqcr11	0.8241758
Myl6	Uqcr11	0.8681319
Cox6b1	Uqcr11	0.832967
Cox6a1	Uqcr11	0.9516484
Vamp2	Uqcr11	0.8813187
Uqcr10	Uqcr11	0.9472527
Bsg	Uqcr11	0.832967
Rpl18a	Uqcr11	0.9120879
Rpl13a	Rpl35a	0.8373626
Rps27	Rpl35a	0.956044
Rpl38	Rpl35a	0.8989011
Selenow	Rpl35a	0.8857143
Rpl26	Rpl35a	0.9252747
Uqcrh	Rpl35a	0.9032967
Fau	Rpl35a	0.8461538
Rpl19	Rpl35a	0.9120879
Uba52	Rpl35a	0.9032967
Rpl31	Rpl35a	0.8769231
Ptgds	Rpl35a	0.8549451
Rps11	Rpl35a	0.956044
Rps25	Rpl35a	0.9428571
Rps17	Rpl35a	0.9604396
Rpl41	Ptms	0.8285714
Rpl13	Ptms	0.8461538
Rpl13a	Rpl21	0.8417582
Rps27	Rpl21	0.9472527
Rpl38	Rpl21	0.9296703
Selenow	Rpl21	0.8725275
Rpl26	Rpl21	0.8989011
Uqcrh	Rpl21	0.8505495
Fau	Rpl21	0.9340659
Rpl19	Rpl21	0.9252747
Sod1	Rpl21	0.8285714
Uba52	Rpl21	0.8901099
Rpl31	Rpl21	0.8857143
Ptgds	Rpl21	0.8857143
Rps11	Rpl21	0.8901099
Rps25	Rpl21	0.9648352
Ndufb9	Rpl21	0.8593407
Rps17	Rpl21	0.8901099
Ndufa3	Rpl21	0.8681319
Rps28	Rpl21	0.8549451
Rpl35a	Rpl21	0.9252747
Myl6	Rpl36	0.8461538
Uqcrh	Rpl36	0.8373626
Sod1	Rpl36	0.8725275
Cox6b1	Rpl36	0.8241758
Cox6a1	Rpl36	0.8505495
Uqcr10	Rpl36	0.832967
Rps17	Rpl36	0.8241758
Atpif1	Rpl36	0.832967
Uqcr11	Rpl36	0.8725275
Rab3a	Septin5	0.8813187
Gnb2	Septin5	0.8769231
Gpi1	Septin5	0.9648352
Eef2	Septin5	0.8725275
Eno2	Septin5	0.8637363
Mtch1	Septin5	0.9472527
Rpl38	Atp5e	0.8901099
Rpl26	Atp5e	0.8681319
Uqcrh	Atp5e	0.9032967
Rpl19	Atp5e	0.8945055
Sod1	Atp5e	0.9164835
Uba52	Atp5e	0.8681319
Atp5k	Atp5e	0.9648352
Atp5h	Atp5e	0.8373626
Atpif1	Atp5e	0.9032967
Atp5o	Atp5e	0.8549451
Rpl35a	Atp5e	0.8285714
Rpl36	Atp5e	0.8505495
Cox6a1	Chchd2	0.9076923
Bsg	Chchd2	0.8593407
Atp5o	Chchd2	0.8285714
Rpl13a	Rps6	0.8285714
Rps27	Rps6	0.8945055
Rpl38	Rps6	0.9120879
Selenow	Rps6	0.8681319
Rpl26	Rps6	0.9428571
Uqcrh	Rps6	0.8989011
Fau	Rps6	0.8901099
Rpl19	Rps6	0.9164835
Rps24	Rps6	0.8505495
Uba52	Rps6	0.9208791
Rpl31	Rps6	0.9032967
Rps21	Rps6	0.8373626
Ptgds	Rps6	0.8989011
Rps11	Rps6	0.8945055
Rps25	Rps6	0.9296703
Rps17	Rps6	0.8945055
Ndufb8	Rps6	0.8461538
Rps28	Rps6	0.8373626
Rpl35a	Rps6	0.9516484
Rpl21	Rps6	0.9296703
Atp5e	Rps6	0.832967
Hsp90ab1	Sv2a	0.8813187
Hsp90aa1	Sv2a	0.8769231
Klc1	Sv2a	0.8725275
Tubb2a	Kif1a	0.8241758
Dnm1	Kif1a	0.9120879
Cplx2	Kif1a	0.9604396
Camk2a	Kif1a	0.8813187
Chd3	Kif1a	0.9076923
Ddn	Kif1a	0.8857143
Tcf25	Kif1a	0.9032967
Ttc3	Kif1a	0.8725275
Rps15	Rpl23a	0.8769231
Rpl26	Rpl23a	0.8769231
Rpl19	Rpl23a	0.8285714
Uba52	Rpl23a	0.8945055
Vamp2	Rpl23a	0.8505495
Atp5h	Rpl23a	0.8593407
Rps21	Rpl23a	0.8593407
Rps28	Rpl23a	0.8417582
Ndufa5	Rpl23a	0.8593407
Rps27	Rpl9	0.9648352
Rpl38	Rpl9	0.8989011
Selenow	Rpl9	0.8813187
Rpl26	Rpl9	0.9340659
Uqcrh	Rpl9	0.832967
Fau	Rpl9	0.832967
Rpl19	Rpl9	0.9164835
Uba52	Rpl9	0.8857143
Rpl31	Rpl9	0.8945055
Rps11	Rpl9	0.8725275
Rps25	Rpl9	0.9032967
Rps17	Rpl9	0.9032967
Rpl35a	Rpl9	0.9648352
Rpl21	Rpl9	0.9120879
Atp5e	Rpl9	0.8461538
Rps6	Rpl9	0.9208791
Nptn	Septin7	0.8241758
ND4L	Septin7	0.8373626
Gpm6a	Septin7	0.8593407
Tspyl4	Septin7	0.9032967
Calm1	Septin7	0.8593407
Eif4a2	Septin7	0.9340659
Ppp3r1	Septin7	0.9252747
Matr3	Septin7	0.8901099
Atp6ap2	Septin7	0.8417582
Pfn2	Septin7	0.9208791
Cplx2	Eif3a	0.9076923
Camk2a	Eif3a	0.9120879
Ahdc1	Eif3a	0.8241758
Ttc3	Eif3a	0.9384615
Kif1a	Eif3a	0.8857143
Gabrg2	Eif1	0.8637363
ND1	Eif1	0.8417582
Nap1l5	Eif1	0.8725275
Ndfip1	Eif1	0.8549451
Vsnl1	Eif1	0.8505495
Rps15	Rpl8	0.8461538
Selenow	Rpl8	0.8901099
Rpl26	Rpl8	0.8373626
Uqcrh	Rpl8	0.8769231
Rpl19	Rpl8	0.8461538
Uba52	Rpl8	0.8593407
Rps25	Rpl8	0.8241758
Rps17	Rpl8	0.8813187
Rpl36	Rpl8	0.8461538
Sptan1	Dbn1	0.8285714
Mprip	Dbn1	0.9340659
Prkcb	Camk2n1	0.8681319
Sst	Rnasek	0.9032967
Npy	Rnasek	0.8637363
Stmn3	Rnasek	0.8241758
Psap	Rnasek	0.8505495
Cox6a1	Rnasek	0.9208791
Mif	Rnasek	0.956044
Bsg	Rnasek	0.9076923
Tspan7	Snrpn	0.9120879
Rtn1	Snrpn	0.9076923
Atp5l	Snrpn	0.8681319
Tmsb10	Rpl23	0.8593407
Rpl13a	Rpl23	0.9076923
Rpl38	Rpl23	0.9296703
Fau	Rpl23	0.9428571
Rpl19	Rpl23	0.8725275
Ppp2r1a	Rpl23	0.8637363
Cox7b	Rpl23	0.8945055
Ptgds	Rpl23	0.8285714
Rpl11	Rpl23	0.832967
Rps25	Rpl23	0.8769231
Ndufb9	Rpl23	0.956044
Ndufb8	Rpl23	0.8593407
Ndufa3	Rpl23	0.8285714
Rps28	Rpl23	0.8769231
Uqcrq	Rpl23	0.8241758
Rpl21	Rpl23	0.8637363
Rps6	Rpl23	0.8681319
Stmn3	Elob	0.8417582
Tecr	Elob	0.8373626
Pebp1	Elob	0.8241758
Bsg	Elob	0.8373626
Atpif1	Elob	0.8417582
Atp5o	Elob	0.8637363
Tmsb10	Rps16	0.8373626
Rpl13a	Rps16	0.8241758
Rpl38	Rps16	0.8813187
Cox5b	Rps16	0.8593407
Fau	Rps16	0.9164835
Ppp2r1a	Rps16	0.8857143
Cox7b	Rps16	0.8637363
Rpl13	Rps16	0.8505495
Atp5j2	Rps16	0.8549451
Rps25	Rps16	0.8593407
Ndufb9	Rps16	0.9472527
Rps19	Rps16	0.8417582
Ndufa3	Rps16	0.8593407
Rps28	Rps16	0.8417582
Rpl37	Rps16	0.8769231
Rpl28	Rps16	0.8681319
Uqcrq	Rps16	0.8549451
Rpl21	Rps16	0.8417582
Rpl23	Rps16	0.9296703
Rpl13a	Rpl3	0.9208791
Rpsa	Rpl3	0.8417582
Rpl11	Rpl3	0.8637363
Ndufb9	Rpl3	0.8417582
Rps19	Rpl3	0.8593407
Rpl23	Rpl3	0.8945055
Snap25	Rab6a	0.8285714
Cpe	Rab6a	0.8637363
Nptn	Rab6a	0.8813187
Gpm6a	Rab6a	0.8857143
Tspyl4	Rab6a	0.9252747
Calm1	Rab6a	0.9252747
Eif4a2	Rab6a	0.8901099
Gpm6b	Rab6a	0.8461538
Ppp3r1	Rab6a	0.9516484
Atp6ap2	Rab6a	0.8725275
Pfn2	Rab6a	0.9472527
Septin7	Rab6a	0.9428571
Dnm1	Stxbp1	0.8505495
Cplx2	Stxbp1	0.9340659
Tcf25	Stxbp1	0.8593407
Ttc3	Stxbp1	0.9120879
Kif1a	Stxbp1	0.9296703
Eif3a	Stxbp1	0.9208791
Gabrg2	Rtn4	0.8505495
ATP8	Rtn4	0.8549451
Snap25	Rtn4	0.8769231
ND2	Rtn4	0.8461538
Nptn	Rtn4	0.9472527
ND4L	Rtn4	0.8461538
Nap1l5	Rtn4	0.8373626
ND5	Rtn4	0.8241758
Gpm6a	Rtn4	0.9120879
Serinc1	Rtn4	0.9076923
Tspyl4	Rtn4	0.9208791
Ndfip1	Rtn4	0.8857143
Vsnl1	Rtn4	0.8989011
Eif4a2	Rtn4	0.8417582
Gpm6b	Rtn4	0.8461538
Ppp3r1	Rtn4	0.9428571
Atp6ap2	Rtn4	0.8285714
Pfn2	Rtn4	0.8989011
Septin7	Rtn4	0.8725275
Rab6a	Rtn4	0.9340659
Tubb4a	Tubb4b	0.8505495
Tuba1b	Tubb4b	0.8593407
Tuba4a	Tubb4b	0.8505495
Tubb3	Tubb4b	0.8725275
Dnm1	Camk2b	0.832967
Cplx2	Camk2b	0.8769231
Camk2a	Camk2b	0.8505495
Ckmt1	Camk2b	0.8681319
Tcf25	Camk2b	0.8593407
Kif1a	Camk2b	0.9208791
Eif3a	Camk2b	0.8637363
Stxbp1	Camk2b	0.8461538
Syp	Eno1	0.8505495
Hsp90ab1	Eno1	0.8505495
Tuba1b	Eno1	0.8241758
Hsp90aa1	Eno1	0.8989011
Klc1	Eno1	0.8593407
Clstn1	Eno1	0.8285714
Sv2a	Eno1	0.8373626
Sod1	Calr	0.8373626
Atp5k	Calr	0.8681319
Atpif1	Calr	0.8813187
Atp5o	Calr	0.8901099
Plp1	Nefl	0.8373626
Nefl	Kif5c	0.9032967
Thy1	Clu	0.8593407
Stmn1	Clu	0.8285714
Tpi1	Clu	0.8593407
Pebp1	Clu	0.8725275
Prdx2	Clu	0.8725275
Elob	Clu	0.832967
Pkm	Flywch1	0.8901099
Uchl1	Flywch1	0.8461538
Eno2	Flywch1	0.8725275
Ncdn	Flywch1	0.9648352
Clstn1	Flywch1	0.9032967
Atp5b	Ndufs2	0.8813187
Rpl11	Ndufs2	0.8241758
Ndufs2	Fez1	0.8461538
Tubb2a	Aco2	0.8285714
Dnm1	Aco2	0.8549451
Cplx2	Aco2	0.9384615
Camk2a	Aco2	0.8505495
Hsp90aa1	Aco2	0.8417582
Chd3	Aco2	0.8769231
Ddn	Aco2	0.8637363
Tcf25	Aco2	0.8857143
Kif1a	Aco2	0.9428571
Eif3a	Aco2	0.8637363
Stxbp1	Aco2	0.9252747
Camk2b	Aco2	0.8637363
Snap25	Ywhag	0.832967
Atp1b1	Ywhag	0.8373626
Atp6ap2	Ywhag	0.8241758
COX1	Skp1	0.8461538
ATP6	Skp1	0.8417582
Gabrg2	Skp1	0.8769231
ATP8	Skp1	0.832967
ND1	Skp1	0.8725275
Snap25	Skp1	0.9076923
ND4	Skp1	0.8593407
CYTB	Skp1	0.8725275
ND2	Skp1	0.9076923
Atp1b1	Skp1	0.8417582
Nptn	Skp1	0.9340659
ND4L	Skp1	0.9164835
Atp5md	Skp1	0.8857143
ND5	Skp1	0.8549451
Gpm6a	Skp1	0.8725275
Serinc1	Skp1	0.9208791
Atp5g3	Skp1	0.8417582
Tspyl4	Skp1	0.8549451
Ywhah	Skp1	0.9120879
Ndfip1	Skp1	0.8945055
Vsnl1	Skp1	0.8813187
Rtn3	Skp1	0.9340659
Rtn4	Skp1	0.8813187
Cpe	Eif4g2	0.8637363
Plp1	Eif4g2	0.832967
Calm1	Eif4g2	0.9120879
Gpm6b	Eif4g2	0.9120879
Ppp3r1	Eif4g2	0.832967
Pfn2	Eif4g2	0.8549451
Septin7	Eif4g2	0.8461538
Rab6a	Eif4g2	0.8725275
Rps27	Rpl37a	0.9384615
Rps29	Rpl37a	0.8813187
Rpl38	Rpl37a	0.8857143
Rps15	Rpl37a	0.9032967
Selenow	Rpl37a	0.9076923
Rpl26	Rpl37a	0.956044
Uqcrh	Rpl37a	0.832967
Fau	Rpl37a	0.8417582
Rpl19	Rpl37a	0.9296703
Rps24	Rpl37a	0.8285714
Uba52	Rpl37a	0.9472527
Rpl31	Rpl37a	0.8901099
Rps21	Rpl37a	0.9296703
Rps11	Rpl37a	0.8989011
Rps25	Rpl37a	0.9164835
Rps17	Rpl37a	0.9164835
Rps28	Rpl37a	0.8945055
Rpl35a	Rpl37a	0.9340659
Rpl21	Rpl37a	0.9164835
Atp5e	Rpl37a	0.8461538
Rps6	Rpl37a	0.9296703
Rpl23a	Rpl37a	0.8769231
Rpl9	Rpl37a	0.9164835
Rpl23	Rpl37a	0.8241758
Myl6	Ubl5	0.8989011
Sod1	Ubl5	0.832967
Cox6b1	Ubl5	0.8505495
Vamp2	Ubl5	0.8241758
Rpl36	Ubl5	0.8549451
Sst	Vgf	0.9516484
Npy	Vgf	0.8989011
Atp1a3	Vgf	0.832967
Ubb	Vgf	0.8241758
Eef1a2	Vgf	0.8241758
Mif	Vgf	0.8549451
Rnasek	Vgf	0.8857143
Atp1b1	Myl12b	0.8285714
Tspan7	Myl12b	0.832967
Syp	Gaa	0.832967
Hsp90ab1	Gaa	0.8901099
Hsp90aa1	Gaa	0.8461538
Ncdn	Gaa	0.8373626
Clstn1	Gaa	0.9032967
Eno1	Gaa	0.8989011
Flywch1	Gaa	0.8549451
Snap25	Ndufab1	0.8285714
Nptn	Ndufab1	0.8725275
Gpm6a	Ndufab1	0.8681319
Serinc1	Ndufab1	0.8989011
Tspyl4	Ndufab1	0.8373626
Ndfip1	Ndufab1	0.8725275
Vsnl1	Ndufab1	0.8813187
Rtn4	Ndufab1	0.8593407
Skp1	Ndufab1	0.8593407
Rps24	Rps27a	0.8549451
Ptgds	Rps27a	0.8461538
Rps6	Rps27a	0.8725275
Rpl23	Rps27a	0.8505495
Rpl3	Rps27a	0.8417582
Syp	Uqcrc1	0.8769231
Pkm	Uqcrc1	0.956044
Tubb4a	Uqcrc1	0.8681319
Ap2m1	Uqcrc1	0.8681319
Klc1	Uqcrc1	0.8417582
Gpi1	Uqcrc1	0.832967
Tuba4a	Uqcrc1	0.8945055
Tubb3	Uqcrc1	0.9516484
Eef2	Uqcrc1	0.9296703
Eno2	Uqcrc1	0.9296703
Clstn1	Uqcrc1	0.8373626
Septin5	Uqcrc1	0.8285714
Pkm	Rap1gap	0.8285714
Tubb2a	Rap1gap	0.832967
Dnm1	Rap1gap	0.9736264
Hsp90ab1	Rap1gap	0.8461538
Cplx2	Rap1gap	0.8681319
Chd3	Rap1gap	0.8945055
Klc1	Rap1gap	0.8813187
Ddn	Rap1gap	0.8901099
Tcf25	Rap1gap	0.956044
Kif1a	Rap1gap	0.956044
Stxbp1	Rap1gap	0.8857143
Camk2b	Rap1gap	0.8813187
Eno1	Rap1gap	0.832967
Aco2	Rap1gap	0.9164835
Uqcrc1	Rap1gap	0.8241758
Apoe	Cst3	0.8725275
Rpl18a	Cst3	0.8285714
Uqcr11	Cst3	0.8373626
Psap	Cplx1	0.8637363
Mif	Cplx1	0.8813187
Tspyl4	Ghitm	0.832967
Kif5c	Ghitm	0.8373626
Matr3	Ghitm	0.8285714
Atp6ap2	Ghitm	0.8593407
Septin7	Ghitm	0.832967
Rab6a	Ghitm	0.8373626
Ywhag	Ghitm	0.8549451
Rps27	Rps10	0.9296703
Rps29	Rps10	0.8373626
Rpl38	Rps10	0.9120879
Rps15	Rps10	0.9120879
Selenow	Rps10	0.9604396
Rpl26	Rps10	0.9340659
Uqcrh	Rps10	0.9120879
Fau	Rps10	0.8637363
Rpl19	Rps10	0.956044
Sod1	Rps10	0.8549451
Uba52	Rps10	0.9428571
Vamp2	Rps10	0.8637363
Rps11	Rps10	0.8945055
Rps25	Rps10	0.9516484
Rps17	Rps10	0.956044
Ndufa3	Rps10	0.8285714
Rpl35a	Rps10	0.9340659
Rpl21	Rps10	0.9120879
Atp5e	Rps10	0.8593407
Rps6	Rps10	0.8945055
Rpl23a	Rps10	0.8417582
Rpl9	Rps10	0.8989011
Rpl8	Rps10	0.8857143
Rpl37a	Rps10	0.9252747
Rps27	Rps14	0.8505495
Rps29	Rps14	0.8901099
Rps15	Rps14	0.9164835
Selenow	Rps14	0.9428571
Rpl26	Rps14	0.9472527
Rpl19	Rps14	0.8681319
Uba52	Rps14	0.9120879
Vamp2	Rps14	0.8241758
Rps21	Rps14	0.8549451
Rps17	Rps14	0.8417582
Rps6	Rps14	0.832967
Rpl23a	Rps14	0.8637363
Rpl9	Rps14	0.8505495
Rpl37a	Rps14	0.9076923
Rps10	Rps14	0.8681319
Tmsb10	Rpl35	0.9208791
Rpl13a	Rpl35	0.8725275
Rpl38	Rpl35	0.9340659
Cox5b	Rpl35	0.8285714
Fau	Rpl35	0.9428571
Rpsa	Rpl35	0.8241758
Rpl19	Rpl35	0.8945055
Ppp2r1a	Rpl35	0.9296703
Cox7b	Rpl35	0.9076923
Rpl13	Rpl35	0.8593407
Chchd10	Rpl35	0.8945055
Rpl11	Rpl35	0.8241758
Atp5j2	Rpl35	0.9164835
Rps25	Rpl35	0.8725275
Ndufb9	Rpl35	0.9648352
Gpx4	Rpl35	0.8505495
Ndufb8	Rpl35	0.8681319
Prdx2	Rpl35	0.8285714
Ndufa3	Rpl35	0.8813187
Rps28	Rpl35	0.8373626
Rpl37	Rpl35	0.8461538
Rpl28	Rpl35	0.9208791
Uqcrq	Rpl35	0.9076923
Rpl23	Rpl35	0.9428571
Rps16	Rpl35	0.9208791
Lrp1	Rplp2	0.8241758
Uqcrq	Rplp2	0.832967
Rpl23a	Rplp2	0.8285714
Slc25a3	Atp6v1b2	0.9604396
Rps27	Rpl17	0.9120879
Rpl38	Rpl17	0.8813187
Rps15	Rpl17	0.8417582
Selenow	Rpl17	0.8681319
Rpl26	Rpl17	0.9032967
Uqcrh	Rpl17	0.9032967
Fau	Rpl17	0.8637363
Rpl19	Rpl17	0.8857143
Sod1	Rpl17	0.832967
Uba52	Rpl17	0.9208791
Rpl31	Rpl17	0.8549451
Ptgds	Rpl17	0.8769231
Rps11	Rpl17	0.9428571
Rps25	Rpl17	0.9472527
Rps17	Rpl17	0.9428571
Ndufa3	Rpl17	0.8417582
Rpl35a	Rpl17	0.9472527
Rpl21	Rpl17	0.956044
Rps6	Rpl17	0.9428571
Rpl9	Rpl17	0.8725275
Rpl37a	Rpl17	0.9296703
Rps10	Rpl17	0.9296703
Myl6	Mt3	0.8637363
Psap	Mt3	0.8725275
Cox6b1	Mt3	0.8857143
Cox6a1	Mt3	0.8901099
Uqcr10	Mt3	0.8373626
Bsg	Mt3	0.8813187
Uqcr11	Mt3	0.8505495
Chchd2	Mt3	0.8901099
Rpsa	Ftl1	0.832967
Rps27	Rps12	0.8857143
Rpl38	Rps12	0.8725275
Rpl26	Rps12	0.8989011
Fau	Rps12	0.8373626
Rpl19	Rps12	0.8769231
Rps24	Rps12	0.8769231
Uba52	Rps12	0.8593407
Rpl31	Rps12	0.8945055
Rps21	Rps12	0.8417582
Rps11	Rps12	0.8285714
Rps25	Rps12	0.8901099
Rps28	Rps12	0.8901099
Rpl35a	Rps12	0.9032967
Rpl21	Rps12	0.8813187
Rps6	Rps12	0.9340659
Rpl9	Rps12	0.8989011
Rpl23	Rps12	0.8725275
Rps16	Rps12	0.8241758
Rpl37a	Rps12	0.9208791
Rps27a	Rps12	0.9120879
Rpl17	Rps12	0.8637363
Cpe	Slc1a2	0.8989011
Calm1	Slc1a2	0.8681319
Gpm6b	Slc1a2	0.8813187
Eif4g2	Slc1a2	0.8769231
Sst	Slc22a17	0.8461538
Atp1a3	Slc22a17	0.9120879
Hspa8	Slc22a17	0.8769231
Ubb	Slc22a17	0.9032967
Stmn3	Slc22a17	0.8241758
Eef1a2	Slc22a17	0.9032967
Vgf	Slc22a17	0.9164835
Snap25	Ywhaz	0.9384615
Atp1b1	Ywhaz	0.8901099
Nptn	Ywhaz	0.8681319
ND4L	Ywhaz	0.9076923
Zwint	Ywhaz	0.8593407
Nap1l5	Ywhaz	0.8505495
ND5	Ywhaz	0.8241758
Gpm6a	Ywhaz	0.9428571
Serinc1	Ywhaz	0.9164835
Tspyl4	Ywhaz	0.9252747
Ywhah	Ywhaz	0.8285714
Ndfip1	Ywhaz	0.9208791
Vsnl1	Ywhaz	0.8549451
Eif4a2	Ywhaz	0.8241758
Ppp3r1	Ywhaz	0.8461538
Atp6ap2	Ywhaz	0.8725275
Rtn3	Ywhaz	0.8901099
Septin7	Ywhaz	0.8417582
Rab6a	Ywhaz	0.832967
Rtn4	Ywhaz	0.8857143
Skp1	Ywhaz	0.8989011
Syp	Tubb5	0.8241758
Pkm	Tubb5	0.8857143
Tubb2a	Tubb5	0.8461538
Tuba1a	Tubb5	0.9164835
Tubb4a	Tubb5	0.8285714
Tuba1b	Tubb5	0.8549451
Tuba4a	Tubb5	0.9208791
Tubb3	Tubb5	0.956044
Tubb4b	Tubb5	0.8989011
Uqcrc1	Tubb5	0.8681319
Tmsb10	Rpl24	0.8945055
Rpl13a	Rpl24	0.9164835
Rpl38	Rpl24	0.9516484
Uqcrh	Rpl24	0.8505495
Fau	Rpl24	0.978022
Rpl19	Rpl24	0.8989011
Ppp2r1a	Rpl24	0.9208791
Cox7b	Rpl24	0.8593407
Rpl13	Rpl24	0.832967
Chchd10	Rpl24	0.8417582
Rpl11	Rpl24	0.8593407
Atp5j2	Rpl24	0.9120879
Rps25	Rpl24	0.9164835
Ndufb9	Rpl24	0.9912088
Gpx4	Rpl24	0.8461538
Ndufb8	Rpl24	0.9076923
Ndufa3	Rpl24	0.9120879
Rps28	Rpl24	0.8285714
Rpl28	Rpl24	0.8813187
Uqcrq	Rpl24	0.8505495
Rpl21	Rpl24	0.8857143
Rps6	Rpl24	0.8549451
Rpl23	Rpl24	0.9604396
Rps16	Rpl24	0.9296703
Rpl3	Rpl24	0.832967
Rps10	Rpl24	0.832967
Rpl35	Rpl24	0.9692308
Rpl17	Rpl24	0.832967
Atp5b	Slc17a7	0.8461538
Slc17a7	Ckb	0.8241758
Rab3a	Slc17a7	0.8769231
Gnb2	Slc17a7	0.8725275
Gpi1	Slc17a7	0.8725275
Eno2	Slc17a7	0.8285714
Rpl11	Slc17a7	0.832967
Mtch1	Slc17a7	0.9032967
Gpx4	Slc17a7	0.8241758
Septin5	Slc17a7	0.9120879
Uqcrc1	Slc17a7	0.8285714
Aldoa	Atp5a1	0.8681319
Hspa8	Atp5a1	0.8285714
Syp	Atp5a1	0.8901099
Tuba1a	Atp5a1	0.8593407
Mdh1	Atp5a1	0.8681319
Clstn1	Atp5a1	0.8417582
Tubb5	Atp5a1	0.8241758
Calm2	Ndufa11	0.832967
Cox4i1	Ndufa11	0.8593407
Stmn3	Ndufa11	0.832967
Myl6	Ndufa11	0.9076923
Psap	Ndufa11	0.9076923
Cox6b1	Ndufa11	0.8989011
Cox6a1	Ndufa11	0.9120879
Mif	Ndufa11	0.8945055
Uqcr10	Ndufa11	0.9120879
Bsg	Ndufa11	0.8769231
Uqcr11	Ndufa11	0.8637363
Rnasek	Ndufa11	0.8593407
Mt3	Ndufa11	0.8593407
Cpe	Rab2a	0.9164835
Nptn	Rab2a	0.8769231
Gpm6a	Rab2a	0.9120879
Tspyl4	Rab2a	0.9032967
Calm1	Rab2a	0.8945055
Eif4a2	Rab2a	0.8505495
Ppp3r1	Rab2a	0.9604396
Atp6ap2	Rab2a	0.8769231
Pfn2	Rab2a	0.9472527
Septin7	Rab2a	0.9472527
Rab6a	Rab2a	0.978022
Rtn4	Rab2a	0.9032967
Eif4g2	Rab2a	0.8725275
Ghitm	Rab2a	0.8373626
Ywhaz	Rab2a	0.8285714
Pkm	Prkar1b	0.8593407
Gnb2	Prkar1b	0.8241758
Gpi1	Prkar1b	0.9032967
Eef2	Prkar1b	0.8285714
Eno2	Prkar1b	0.8637363
Septin5	Prkar1b	0.9208791
Flywch1	Prkar1b	0.8241758
Prkar1b	Thra	0.8461538
Uqcrc1	Prkar1b	0.8285714
Slc17a7	Prkar1b	0.8857143
ND4L	Ppp1cb	0.9032967
ND5	Ppp1cb	0.8593407
Gpm6a	Ppp1cb	0.8681319
Tspyl4	Ppp1cb	0.9120879
Ndfip1	Ppp1cb	0.8241758
Eif4a2	Ppp1cb	0.9208791
Ppp3r1	Ppp1cb	0.8549451
Atp6ap2	Ppp1cb	0.8813187
Pfn2	Ppp1cb	0.9252747
Septin7	Ppp1cb	0.9384615
Rab6a	Ppp1cb	0.8857143
Rtn4	Ppp1cb	0.8241758
Ywhaz	Ppp1cb	0.8593407
Rab2a	Ppp1cb	0.8989011
Cpe	Tmem30a	0.8593407
Nptn	Tmem30a	0.8461538
ND4L	Tmem30a	0.8241758
Nap1l5	Tmem30a	0.8725275
Gpm6a	Tmem30a	0.9472527
Serinc1	Tmem30a	0.8461538
Tspyl4	Tmem30a	0.9296703
Ndfip1	Tmem30a	0.8593407
Vsnl1	Tmem30a	0.8285714
Eif4a2	Tmem30a	0.8505495
Ppp3r1	Tmem30a	0.9428571
Atp6ap2	Tmem30a	0.8901099
Pfn2	Tmem30a	0.9252747
Septin7	Tmem30a	0.9252747
Rab6a	Tmem30a	0.9384615
Rtn4	Tmem30a	0.8945055
Ywhaz	Tmem30a	0.8725275
Rab2a	Tmem30a	0.9648352
Ppp1cb	Tmem30a	0.9120879
Synj1	Gprasp1	0.9340659
Atp6v1b2	Gprasp1	0.8549451
Calm2	Gabarapl1	0.8857143
Cox4i1	Gabarapl1	0.8857143
Stmn3	Gabarapl1	0.8373626
Calm3	Gabarapl1	0.8637363
Myl6	Gabarapl1	0.8901099
Tecr	Gabarapl1	0.8241758
Psap	Gabarapl1	0.8725275
Cox6b1	Gabarapl1	0.8945055
Bsg	Gabarapl1	0.8549451
Mt3	Gabarapl1	0.8681319
Ndufa11	Gabarapl1	0.8637363
Zwint	Ywhab	0.8241758
Nap1l5	Ywhab	0.8593407
Matr3	Ywhab	0.8637363
Camk2n1	Ywhab	0.8241758
Ppia	Nsg1	0.8593407
Tmsb10	Nsg1	0.8681319
Stmn1	Nsg1	0.832967
Rab3a	Nsg1	0.8945055
Pebp1	Nsg1	0.8285714
Ndufb9	Nsg1	0.8593407
Prdx5	Nsg1	0.8593407
Ndufb8	Nsg1	0.8373626
Calr	Nsg1	0.8505495
Rpl24	Nsg1	0.8285714
Rps27	Rps18	0.8769231
Rps29	Rps18	0.8241758
Rps15	Rps18	0.8901099
Selenow	Rps18	0.9340659
Rpl26	Rps18	0.9384615
Uqcrh	Rps18	0.8505495
Rpl19	Rps18	0.8769231
Uba52	Rps18	0.9384615
Vamp2	Rps18	0.8373626
Rps25	Rps18	0.8857143
Rps17	Rps18	0.9384615
Rpl18a	Rps18	0.832967
Rpl35a	Rps18	0.8945055
Rpl21	Rps18	0.8637363
Rps6	Rps18	0.8813187
Rpl9	Rps18	0.8725275
Rpl8	Rps18	0.9252747
Rpl37a	Rps18	0.8549451
Rps10	Rps18	0.9340659
Rps14	Rps18	0.8813187
Rpl17	Rps18	0.8857143
Stmn3	Atp5d	0.8637363
Sod1	Atp5d	0.8461538
Tecr	Atp5d	0.8549451
Cox6a1	Atp5d	0.8505495
Mif	Atp5d	0.8989011
Pebp1	Atp5d	0.8769231
Uqcr10	Atp5d	0.8373626
Bsg	Atp5d	0.9516484
Atpif1	Atp5d	0.8769231
Atp5o	Atp5d	0.8857143
Rnasek	Atp5d	0.8901099
Elob	Atp5d	0.9252747
Ndufa11	Atp5d	0.8461538
Gabarapl1	Atp5d	0.832967
Nap1l5	Rab1a	0.8285714
Gpm6a	Rab1a	0.8681319
Tspyl4	Rab1a	0.9340659
Calm1	Rab1a	0.8681319
Eif4a2	Rab1a	0.9296703
Ppp3r1	Rab1a	0.9120879
Matr3	Rab1a	0.8857143
Atp6ap2	Rab1a	0.8857143
Pfn2	Rab1a	0.956044
Septin7	Rab1a	0.9692308
Rab6a	Rab1a	0.9604396
Rtn4	Rab1a	0.8857143
Eif4g2	Rab1a	0.8593407
Ghitm	Rab1a	0.8725275
Ywhaz	Rab1a	0.8285714
Rab2a	Rab1a	0.956044
Ppp1cb	Rab1a	0.8989011
Tmem30a	Rab1a	0.9384615
Pkm	Sult4a1	0.9120879
Tubb4a	Sult4a1	0.8549451
Gpi1	Sult4a1	0.8593407
Tubb3	Sult4a1	0.8241758
Eef2	Sult4a1	0.8945055
Eno2	Sult4a1	0.8681319
Septin5	Sult4a1	0.9120879
Uqcrc1	Sult4a1	0.9032967
Slc17a7	Sult4a1	0.9164835
Prkar1b	Sult4a1	0.9516484
Nrgn	Hpca	0.8241758
Thy1	Pld3	0.8593407
Stmn1	Pld3	0.8549451
Rab3a	Pld3	0.8373626
Pebp1	Pld3	0.8725275
Chchd10	Pld3	0.8637363
Pcsk1n	Pld3	0.8505495
Prdx2	Pld3	0.8813187
Rpl28	Pld3	0.8241758
Pld3	Aplp1	0.8637363
Clu	Pld3	0.9032967
Tuba1a	Spock2	0.8505495
Mdh1	Spock2	0.9120879
Tubb5	Spock2	0.8373626
Atp5a1	Spock2	0.8769231
Aldoc	Trf	0.9252747
Aldoa	Acot7	0.9296703
Hspa8	Acot7	0.8637363
Syp	Acot7	0.8857143
Ubb	Acot7	0.8373626
Stmn3	Acot7	0.8285714
Calm3	Acot7	0.8505495
Myl6	Acot7	0.832967
Eef1a2	Acot7	0.8593407
Psap	Acot7	0.8373626
Cox6b1	Acot7	0.8505495
Atp5a1	Acot7	0.8637363
Fau	Eef1b2	0.8373626
Rps8	Eef1b2	0.8769231
Rpl13	Eef1b2	0.9428571
Rps19	Eef1b2	0.9076923
Rpl37	Eef1b2	0.9340659
Rpl28	Eef1b2	0.8241758
Rps16	Eef1b2	0.8901099
Syp	Snap47	0.8813187
Pkm	Snap47	0.9604396
Tubb2a	Snap47	0.8549451
Hsp90ab1	Snap47	0.9120879
Ap2m1	Snap47	0.8945055
Tubb3	Snap47	0.8593407
Eno2	Snap47	0.8901099
Ncdn	Snap47	0.8681319
Clstn1	Snap47	0.9824176
Tcf25	Snap47	0.8417582
Flywch1	Snap47	0.8857143
Gaa	Snap47	0.8593407
Uqcrc1	Snap47	0.8989011
Rap1gap	Snap47	0.832967
Tubb5	Snap47	0.8461538
Prkar1b	Snap47	0.8241758
Sult4a1	Snap47	0.8417582
Camk2a	Itpr1	0.8945055
Ttc3	Itpr1	0.8593407
Eif3a	Itpr1	0.8901099
Atp6v1b2	Itpr1	0.8417582
Gabrg2	Pgrmc1	0.9076923
Snap25	Pgrmc1	0.8725275
Nptn	Pgrmc1	0.832967
ND4L	Pgrmc1	0.8285714
Zwint	Pgrmc1	0.8461538
Atp5md	Pgrmc1	0.8901099
Nap1l5	Pgrmc1	0.8241758
Gpm6a	Pgrmc1	0.8637363
Serinc1	Pgrmc1	0.9384615
Tspyl4	Pgrmc1	0.8549451
Ndfip1	Pgrmc1	0.8637363
Vsnl1	Pgrmc1	0.8945055
Rtn3	Pgrmc1	0.9340659
Rtn4	Pgrmc1	0.8285714
Skp1	Pgrmc1	0.9296703
Ywhaz	Pgrmc1	0.8769231
Tmem30a	Pgrmc1	0.8285714
Syp	Mdh2	0.8417582
Ubb	Mdh2	0.8241758
Uchl1	Mdh2	0.8505495
Ap2m1	Mdh2	0.8593407
Stmn1	Mdh2	0.8637363
Rab3a	Mdh2	0.8593407
Tpi1	Mdh2	0.9692308
Eno2	Mdh2	0.8725275
Clu	Mdh2	0.8637363
Uchl1	Scn1b	0.8417582
Gnb2	Scn1b	0.8241758
Syp	Clstn3	0.8637363
Uchl1	Clstn3	0.9252747
Stmn1	Clstn3	0.9120879
Rab3a	Clstn3	0.9428571
Gpi1	Clstn3	0.8285714
Tpi1	Clstn3	0.9296703
Pebp1	Clstn3	0.8725275
Eno2	Clstn3	0.8769231
Mtch1	Clstn3	0.8813187
Prdx2	Clstn3	0.8593407
Septin5	Clstn3	0.8241758
Clu	Clstn3	0.832967
Nsg1	Clstn3	0.8417582
Pld3	Clstn3	0.8549451
Mdh2	Clstn3	0.9340659
Snap25	Pgk1	0.8989011
Atp1b1	Pgk1	0.9296703
Zwint	Pgk1	0.8373626
Rpl13a	Rpl27a	0.8857143
Rps27	Rpl27a	0.8945055
Rpl38	Rpl27a	0.9164835
Selenow	Rpl27a	0.8241758
Fau	Rpl27a	0.978022
Rpl19	Rpl27a	0.9164835
Rpl41	Rpl27a	0.8285714
Ppp2r1a	Rpl27a	0.8725275
Rpl13	Rpl27a	0.8769231
Ptgds	Rpl27a	0.8285714
Rps11	Rpl27a	0.8505495
Atp5j2	Rpl27a	0.8241758
Rps25	Rpl27a	0.956044
Ndufb9	Rpl27a	0.9296703
Ndufa3	Rpl27a	0.8769231
Rps28	Rpl27a	0.8901099
Rpl37	Rpl27a	0.8549451
Rpl35a	Rpl27a	0.8461538
Rpl21	Rpl27a	0.9340659
Rps6	Rpl27a	0.8681319
Rpl9	Rpl27a	0.8285714
Rpl23	Rpl27a	0.9340659
Rps16	Rpl27a	0.9208791
Rpl37a	Rpl27a	0.8637363
Rps10	Rpl27a	0.8593407
Rpl35	Rpl27a	0.9164835
Rpl17	Rpl27a	0.8681319
Rps12	Rpl27a	0.8549451
Rpl24	Rpl27a	0.9472527
Eef1b2	Rpl27a	0.8593407
Snap25	Cdc42	0.8285714
Nptn	Cdc42	0.8637363
ND4L	Cdc42	0.8725275
Gpm6a	Cdc42	0.9296703
Serinc1	Cdc42	0.8285714
Tspyl4	Cdc42	0.9164835
Eif4a2	Cdc42	0.9076923
Ppp3r1	Cdc42	0.9164835
Matr3	Cdc42	0.8505495
Atp6ap2	Cdc42	0.9252747
Pfn2	Cdc42	0.8813187
Septin7	Cdc42	0.9032967
Rab6a	Cdc42	0.9032967
Rtn4	Cdc42	0.8725275
Ghitm	Cdc42	0.8989011
Ywhaz	Cdc42	0.8505495
Rab2a	Cdc42	0.9120879
Ppp1cb	Cdc42	0.8681319
Tmem30a	Cdc42	0.9032967
Rab1a	Cdc42	0.9120879
Ndufa5	Atp5mpl	0.832967
Snurf	Pfkp	0.8857143
Pkm	Pfkp	0.8285714
Dnm1	Pfkp	0.8549451
Hsp90ab1	Pfkp	0.8373626
Tuba1b	Pfkp	0.832967
Hsp90aa1	Pfkp	0.8373626
Klc1	Pfkp	0.956044
Ckmt1	Pfkp	0.9076923
Tubb3	Pfkp	0.8681319
Tcf25	Pfkp	0.9164835
Ndufa10	Pfkp	0.9032967
Camk2b	Pfkp	0.8725275
Aco2	Pfkp	0.8417582
Uqcrc1	Pfkp	0.8549451
Rap1gap	Pfkp	0.8989011
Bsg	Pcp4	0.832967
Gabarapl1	Pcp4	0.8813187
Rpl31	Hbb-b1	0.8945055
Rps12	Hbb-b1	0.8241758
Gabrg2	Rpl22l1	0.9252747
Snap25	Rpl22l1	0.832967
ND2	Rpl22l1	0.8241758
ND4L	Rpl22l1	0.9164835
Atp5md	Rpl22l1	0.8593407
Nap1l5	Rpl22l1	0.8549451
ND5	Rpl22l1	0.8461538
Gpm6a	Rpl22l1	0.8637363
Serinc1	Rpl22l1	0.8945055
Tspyl4	Rpl22l1	0.8989011
Ywhah	Rpl22l1	0.8681319
Ndfip1	Rpl22l1	0.9120879
Vsnl1	Rpl22l1	0.8857143
Eif4a2	Rpl22l1	0.8637363
Atp6ap2	Rpl22l1	0.8461538
Rtn3	Rpl22l1	0.8725275
Pfn2	Rpl22l1	0.8417582
Eif1	Rpl22l1	0.8285714
Skp1	Rpl22l1	0.8857143
Ywhaz	Rpl22l1	0.8857143
Ppp1cb	Rpl22l1	0.9208791
Tmem30a	Rpl22l1	0.8549451
Pgrmc1	Rpl22l1	0.8945055
Hsp90ab1	Clip3	0.8461538
Sv2a	Clip3	0.8417582
Stmn1	Grina	0.8945055
Pebp1	Grina	0.8945055
Aplp1	Grina	0.8769231
Elob	Grina	0.8373626
Clu	Grina	0.9076923
Atp5d	Grina	0.8681319
Pld3	Grina	0.8769231
Snap25	Ywhae	0.9340659
Atp1b1	Ywhae	0.9472527
Zwint	Ywhae	0.9340659
Serinc1	Ywhae	0.9032967
Tspyl4	Ywhae	0.8505495
Atp6ap2	Ywhae	0.832967
Skp1	Ywhae	0.8241758
Ywhaz	Ywhae	0.8285714
Pgk1	Ywhae	0.9428571
Rpl13a	Rpl4	0.9076923
Rps27	Rpl4	0.9120879
Rpl38	Rpl4	0.8373626
Fau	Rpl4	0.8813187
Rpsa	Rpl4	0.8417582
Rpl19	Rpl4	0.8549451
Ptgds	Rpl4	0.8373626
Rpl11	Rpl4	0.8989011
Rps11	Rpl4	0.8989011
Rps25	Rpl4	0.9120879
Rps17	Rpl4	0.8373626
Rpl35a	Rpl4	0.9120879
Rpl21	Rpl4	0.8945055
Rps6	Rpl4	0.8637363
Rpl9	Rpl4	0.8989011
Rps10	Rpl4	0.8241758
Rpl17	Rpl4	0.8417582
Rps12	Rpl4	0.8241758
Rpl24	Rpl4	0.8373626
Rpl27a	Rpl4	0.8813187
Sod1	Pvalb	0.8461538
Tecr	Pvalb	0.832967
Prdx5	Pvalb	0.8505495
Atpif1	Pvalb	0.8725275
Atp5o	Pvalb	0.9032967
Elob	Pvalb	0.8461538
Gabarapl1	Pvalb	0.832967
Pcp4	Pvalb	0.8461538
Gabrg2	Serpini1	0.8725275
Snap25	Serpini1	0.8417582
Atp1b1	Serpini1	0.8637363
Nptn	Serpini1	0.8417582
ND4L	Serpini1	0.8417582
Zwint	Serpini1	0.9164835
Atp5md	Serpini1	0.8373626
Nap1l5	Serpini1	0.8945055
Gpm6a	Serpini1	0.8901099
Serinc1	Serpini1	0.9076923
Tspyl4	Serpini1	0.8989011
Ndfip1	Serpini1	0.8373626
Vsnl1	Serpini1	0.8681319
Ppp3r1	Serpini1	0.8285714
Atp6ap2	Serpini1	0.9384615
Rtn3	Serpini1	0.8373626
Eif1	Serpini1	0.8593407
Rtn4	Serpini1	0.8241758
Skp1	Serpini1	0.8373626
Ndufab1	Serpini1	0.8505495
Ywhaz	Serpini1	0.8461538
Tmem30a	Serpini1	0.8373626
Ywhab	Serpini1	0.8373626
Pgrmc1	Serpini1	0.8505495
Cdc42	Serpini1	0.8901099
Rpl22l1	Serpini1	0.8725275
Ywhae	Serpini1	0.8505495
Thy1	Nedd8	0.9032967
Cfl1	Nedd8	0.8637363
Rpl41	Nedd8	0.8637363
Ppp2r1a	Nedd8	0.8549451
Rpl13	Nedd8	0.8241758
Chchd10	Nedd8	0.9076923
Atp5j2	Nedd8	0.8505495
Prdx2	Nedd8	0.8637363
Rpl28	Nedd8	0.8813187
Uqcrq	Nedd8	0.8285714
Ptms	Nedd8	0.8461538
Rpl35	Nedd8	0.8373626
Nedd8	Oaz1	0.8769231
Cox4i1	Cox7c	0.8285714
Rpl38	Cox7c	0.8417582
Rps15	Cox7c	0.8417582
Myl6	Cox7c	0.8505495
Rpl26	Cox7c	0.8637363
Uqcrh	Cox7c	0.8813187
Rpl19	Cox7c	0.8593407
Sod1	Cox7c	0.9164835
Uba52	Cox7c	0.8901099
Atp5k	Cox7c	0.9076923
Cox6a1	Cox7c	0.8505495
Vamp2	Cox7c	0.8549451
Atp5h	Cox7c	0.8637363
Uqcr10	Cox7c	0.8593407
Atpif1	Cox7c	0.9120879
Atp5o	Cox7c	0.8681319
Uqcr11	Cox7c	0.8549451
Rpl36	Cox7c	0.8857143
Atp5e	Cox7c	0.9604396
Rpl8	Cox7c	0.832967
Rps10	Cox7c	0.8549451
Rps18	Cox7c	0.8285714
Snrpn	Atp6v1g2	0.8505495
Snurf	Nisch	0.8725275
Dnm1	Nisch	0.9120879
Tubb4a	Nisch	0.8241758
Chd3	Nisch	0.8593407
Klc1	Nisch	0.9076923
Ckmt1	Nisch	0.8769231
Tubb3	Nisch	0.8241758
Eef2	Nisch	0.8373626
Tcf25	Nisch	0.9252747
Ndufa10	Nisch	0.8285714
Kif1a	Nisch	0.9032967
Stxbp1	Nisch	0.8417582
Camk2b	Nisch	0.9340659
Aco2	Nisch	0.8593407
Uqcrc1	Nisch	0.8549451
Rap1gap	Nisch	0.9428571
Pfkp	Nisch	0.956044
Camk2a	Sdha	0.8373626
Slc25a3	Sdha	0.9208791
Eif3a	Sdha	0.8505495
Atp6v1b2	Sdha	0.9120879
Gprasp1	Sdha	0.8549451
Itpr1	Sdha	0.9208791
Tmsb10	Ndufs5	0.8725275
Rpl38	Ndufs5	0.8373626
Stmn1	Ndufs5	0.8461538
Fau	Ndufs5	0.8373626
Sod1	Ndufs5	0.8549451
Ppp2r1a	Ndufs5	0.8681319
Pebp1	Ndufs5	0.9208791
Chchd10	Ndufs5	0.8417582
Atp5j2	Ndufs5	0.9428571
Ndufb9	Ndufs5	0.8989011
Gpx4	Ndufs5	0.8549451
Prdx5	Ndufs5	0.8549451
Ndufa3	Ndufs5	0.8813187
Atpif1	Ndufs5	0.8593407
Rpl35	Ndufs5	0.8505495
Rpl24	Ndufs5	0.8857143
Nsg1	Ndufs5	0.8549451
Snap25	Morf4l1	0.9032967
Atp1b1	Morf4l1	0.8549451
Gpm6a	Morf4l1	0.8593407
Serinc1	Morf4l1	0.8681319
Tspyl4	Morf4l1	0.8681319
Ywhah	Morf4l1	0.8989011
Ndfip1	Morf4l1	0.9208791
Vsnl1	Morf4l1	0.8549451
Pfn2	Morf4l1	0.8593407
Rab6a	Morf4l1	0.8461538
Rtn4	Morf4l1	0.8593407
Skp1	Morf4l1	0.8593407
Ywhaz	Morf4l1	0.8945055
Rab2a	Morf4l1	0.8461538
Ppp1cb	Morf4l1	0.8373626
Tmem30a	Morf4l1	0.8725275
Rab1a	Morf4l1	0.8241758
Pgrmc1	Morf4l1	0.8505495
Rpl22l1	Morf4l1	0.8373626
Sst	Rab3b	0.9032967
Npy	Rab3b	0.8637363
Ubb	Rab3b	0.8241758
Vgf	Rab3b	0.8901099
Cox4i1	Cox7a2	0.9296703
Stmn3	Cox7a2	0.8549451
Myl6	Cox7a2	0.9472527
Psap	Cox7a2	0.9120879
Cox6b1	Cox7a2	0.9692308
Cox6a1	Cox7a2	0.8813187
Uqcr10	Cox7a2	0.8461538
Bsg	Cox7a2	0.8461538
Uqcr11	Cox7a2	0.8285714
Rpl36	Cox7a2	0.8285714
Chchd2	Cox7a2	0.8417582
Ubl5	Cox7a2	0.8241758
Mt3	Cox7a2	0.9208791
Ndufa11	Cox7a2	0.9032967
Gabarapl1	Cox7a2	0.8593407
Calm2	Ndufa1	0.8285714
Myl6	Ndufa1	0.9032967
Psap	Ndufa1	0.8681319
Cox6b1	Ndufa1	0.8989011
Cox6a1	Ndufa1	0.8593407
Uqcr10	Ndufa1	0.9164835
Uqcr11	Ndufa1	0.9076923
Ndufa11	Ndufa1	0.9120879
Cox7a2	Ndufa1	0.8549451
Uchl1	Ptov1	0.8989011
Ncdn	Ptov1	0.8285714
Flywch1	Ptov1	0.8637363
Rps15	Rpl10	0.8681319
Selenow	Rpl10	0.8417582
Rpl26	Rpl10	0.8681319
Uba52	Rpl10	0.9032967
Vamp2	Rpl10	0.8593407
Rps17	Rpl10	0.8593407
Rpl23a	Rpl10	0.832967
Rpl8	Rpl10	0.832967
Rps10	Rpl10	0.8901099
Rpl17	Rpl10	0.8241758
Rps18	Rpl10	0.9428571
Dynll2	Slc25a4	0.8373626
Atp5a1	Slc25a4	0.8725275
Spock2	Slc25a4	0.8373626
Acot7	Slc25a4	0.8373626
Zwint	Nsg2	0.8637363
Serinc1	Nsg2	0.8549451
Ywhae	Nsg2	0.8593407
Pkm	Pfkm	0.8417582
Tubb2a	Pfkm	0.9340659
Tuba1a	Pfkm	0.8241758
Dnm1	Pfkm	0.8373626
Hsp90ab1	Pfkm	0.8681319
Cplx2	Pfkm	0.832967
Hsp90aa1	Pfkm	0.8637363
Klc1	Pfkm	0.8505495
Tubb3	Pfkm	0.8593407
Tcf25	Pfkm	0.8725275
Kif1a	Pfkm	0.9076923
Eif3a	Pfkm	0.8681319
Stxbp1	Pfkm	0.8945055
Camk2b	Pfkm	0.8505495
Eno1	Pfkm	0.8373626
Aco2	Pfkm	0.8989011
Rap1gap	Pfkm	0.9208791
Tubb5	Pfkm	0.8945055
Snap47	Pfkm	0.8505495
Pfkp	Pfkm	0.8813187
Nisch	Pfkm	0.8681319
Tspyl4	Atp6v1a	0.8417582
Eif4a2	Atp6v1a	0.8681319
Matr3	Atp6v1a	0.9340659
Atp6ap2	Atp6v1a	0.8373626
Septin7	Atp6v1a	0.8505495
Rab6a	Atp6v1a	0.832967
Ghitm	Atp6v1a	0.9076923
Ywhab	Atp6v1a	0.8637363
Rab1a	Atp6v1a	0.9076923
Cdc42	Atp6v1a	0.8593407
Cox6a1	Atp6v0b	0.9032967
Vamp2	Atp6v0b	0.8285714
Uqcr11	Atp6v0b	0.8417582
Rnasek	Atp6v0b	0.8505495
Mt3	Atp6v0b	0.832967
Ndufa11	Atp6v0b	0.8505495
Cox7a2	Atp6v0b	0.8549451
Snurf	Ncl	0.8901099
Klc1	Ncl	0.9076923
Ckmt1	Ncl	0.8241758
Pfkp	Ncl	0.8813187
Nisch	Ncl	0.8593407
Cog7	Dync1h1	0.8285714
Dnm1	Dync1h1	0.8945055
Chd3	Dync1h1	0.9208791
Ddn	Dync1h1	0.8285714
Tcf25	Dync1h1	0.8769231
Kif1a	Dync1h1	0.8901099
Stxbp1	Dync1h1	0.8505495
Aco2	Dync1h1	0.8241758
Dync1h1	Meis3	0.832967
Rap1gap	Dync1h1	0.8989011
Nisch	Dync1h1	0.8857143
Dnm1	Dctn1	0.956044
Chd3	Dctn1	0.956044
Klc1	Dctn1	0.8505495
Ddn	Dctn1	0.9120879
Tcf25	Dctn1	0.8989011
Kif1a	Dctn1	0.8857143
Aco2	Dctn1	0.8593407
Rap1gap	Dctn1	0.9428571
Pfkp	Dctn1	0.8637363
Nisch	Dctn1	0.9208791
Pfkm	Dctn1	0.8285714
Dync1h1	Dctn1	0.9252747
Cplx2	Agap2	0.9164835
Camk2a	Agap2	0.9472527
Chd3	Agap2	0.9076923
Ahdc1	Agap2	0.8857143
Ddn	Agap2	0.8901099
Ttc3	Agap2	0.8857143
Kif1a	Agap2	0.9252747
Eif3a	Agap2	0.9076923
Stxbp1	Agap2	0.8593407
Camk2b	Agap2	0.8373626
Aco2	Agap2	0.8593407
Rap1gap	Agap2	0.8461538
Itpr1	Agap2	0.832967
Pfkm	Agap2	0.8725275
Dctn1	Agap2	0.8285714
Snurf	Psmb5	0.832967
Tmsb10	Psmb5	0.8945055
Uchl1	Psmb5	0.8857143
Stmn1	Psmb5	0.8945055
Klc1	Psmb5	0.8725275
Rab3a	Psmb5	0.9516484
Pebp1	Psmb5	0.8417582
Mtch1	Psmb5	0.9032967
Slc17a7	Psmb5	0.8549451
Nsg1	Psmb5	0.9296703
Clstn3	Psmb5	0.9120879
Ndufs5	Psmb5	0.8285714
Ncl	Psmb5	0.832967
Rpsa	Rpl12	0.8417582
Rps8	Rpl12	0.9296703
Mprip	Rpl12	0.8241758
Rpl13	Rpl12	0.9516484
Rps19	Rpl12	0.8813187
Rpl37	Rpl12	0.9516484
Rpl28	Rpl12	0.8373626
Rps16	Rpl12	0.8549451
Eef1b2	Rpl12	0.9296703
Rpl27a	Rpl12	0.8505495
Klc1	Nudc	0.8373626
Rab3a	Nudc	0.832967
Eno2	Nudc	0.8417582
Uqcrc1	Nudc	0.8857143
Ncl	Nudc	0.832967
Tmsb10	Map1lc3a	0.832967
Uchl1	Map1lc3a	0.8549451
Stmn1	Map1lc3a	0.8549451
Cfl1	Map1lc3a	0.8901099
Sod1	Map1lc3a	0.8593407
Ppp2r1a	Map1lc3a	0.832967
Pebp1	Map1lc3a	0.956044
Chchd10	Map1lc3a	0.9076923
Atp5j2	Map1lc3a	0.9516484
Prdx5	Map1lc3a	0.9252747
Ndufa3	Map1lc3a	0.8725275
Atpif1	Map1lc3a	0.8901099
Atp5o	Map1lc3a	0.9120879
Uqcrq	Map1lc3a	0.8901099
Elob	Map1lc3a	0.8505495
Atp5d	Map1lc3a	0.8549451
Grina	Map1lc3a	0.8593407
Pvalb	Map1lc3a	0.8901099
Nedd8	Map1lc3a	0.8373626
Ndufs5	Map1lc3a	0.9032967
Snap25	Gabra1	0.8417582
Atp1b1	Gabra1	0.832967
Nptn	Gabra1	0.8681319
ND4L	Gabra1	0.8505495
Gpm6a	Gabra1	0.9296703
Serinc1	Gabra1	0.8285714
Tspyl4	Gabra1	0.9252747
Eif4a2	Gabra1	0.8945055
Ppp3r1	Gabra1	0.9164835
Matr3	Gabra1	0.8417582
Atp6ap2	Gabra1	0.9428571
Pfn2	Gabra1	0.9032967
Septin7	Gabra1	0.9032967
Rab6a	Gabra1	0.9252747
Rtn4	Gabra1	0.8769231
Ghitm	Gabra1	0.9208791
Ywhaz	Gabra1	0.8505495
Rab2a	Gabra1	0.9340659
[truncated: 63,536 more rows]

## Sheet: Hub_genes_SST
name	module	lfc_FFI	fdr_FFI	lfc_CJD	fdr_CJD	DEG	degree
Wdr81	1	-0.240006602447915	0.187437876450754	-0.0704161335475258	0.713646264109118	neither	614
Kcnq2	1	-0.22684769064651	0.158382970392794	-0.0799509232200954	0.689171321890613	neither	604
Abr	1	-0.158333875155958	0.333286382679212	-0.0144027885725809	0.955653497082027	neither	602
Rusc2	1	-0.330964929389382	0.0539948281202737	-0.117682829735004	0.526467262439061	neither	598
Kdm4a	1	-0.313492839393831	0.0562556234095647	-0.100497658855023	0.604955725021849	neither	591
Smarca2	1	-0.18949435213067	0.262765033913644	-0.0682554043455101	0.730321012554845	neither	586
Gtf3c1	1	-0.399125621817393	0.0188779486074716	-0.164504616674754	0.343746796454012	FFI	585
Abcf2	1	-0.190979815769612	0.254287442306252	-0.0618312367168835	0.759059172294701	neither	576
Kif1a	1	-0.321140504439646	0.0624319375248515	-0.12774444977559	0.475087133241463	neither	576
Nol6	1	-0.264266592211373	0.135594643025948	-0.054319092166407	0.781383592731254	neither	576
Tecpr1	1	-0.248826495378627	0.164880939107907	-0.0393747967847121	0.854657215636055	neither	576
Pdzd4	1	-0.221896436447858	0.180787696340232	-0.0793829772856091	0.691578355494155	neither	573
Abcg4	1	-0.1572250330158	0.396832658653303	-0.0763990168456347	0.702669555097647	neither	570
Ptprs	1	-0.266999560140212	0.109510800622533	-0.111619468435001	0.555735863498618	neither	570
Dusp8	1	-0.125403655653495	0.513961655180898	-0.0205306671160294	0.933397460915481	neither	569
Cabin1	1	-0.281310170333735	0.110469304493874	-0.0619989490693812	0.754683275874537	neither	568
Map3k4	1	-0.290601455606082	0.0815787122445927	-0.0854387525996527	0.66998440759835	neither	563
Osbp2	1	-0.278786919981943	0.088965862363354	-0.128110908140229	0.452799310143646	neither	563
Rap1gap	1	-0.216374138284121	0.238755212813872	-0.0535973324878475	0.78965011104496	neither	562
Depdc5	1	-0.407824851443047	0.00959593668437181	-0.161547600894564	0.353414668514068	FFI	560
Gba2	1	-0.26394138282753	0.126311373637936	-0.101658257508509	0.595256456209146	neither	559
Dab2ip	1	-0.19305144020301	0.254287442306252	-0.0358702057460665	0.877787796543643	neither	557
Carm1	1	-0.112829623588243	0.544940946619274	-0.0266462586912631	0.912226967069883	neither	554
Pdxk	1	-0.231619192655243	0.1489105141249	-0.0998741950699596	0.606003178185445	neither	554
Adar	1	-0.275277719788314	0.0665115187958406	-0.109251135494098	0.56756221319264	neither	551
Mta3	1	-0.383700251399271	0.0214651953696239	-0.165048142212004	0.338652533606433	FFI	551
Vps11	1	-0.280946518686802	0.0974455419853203	-0.0429302560859659	0.837000663400563	neither	551
Mtch1	2	0.121695424254633	0.553598031039595	0.0597803683838774	0.757202852872039	neither	186
Eno2	2	0.0224174374020747	0.930476460111231	0.0161541018395881	0.949004583649975	neither	165
Mlf2	2	0.107414126497428	0.581955408134617	0.0716037707744458	0.716448126747348	neither	159
Rab3a	2	0.10323828803389	0.608476093103021	0.065810748452288	0.744068427503062	neither	156
Clstn3	2	0.056724989287188	0.817830276754944	0.0207257408804633	0.930685915109132	neither	155
Nomo1	2	-0.0515107113191918	0.835447124592332	-0.0361623990042173	0.870015355706884	neither	155
Tmsb10	2	0.150826016575845	0.431242035092172	0.0932993278814487	0.61138302350632	neither	155
Tomm7	2	0.169941167312328	0.382079414984802	0.110698560147354	0.557159445848442	neither	149
Clstn1	2	-0.0957134211833267	0.654936290512079	-0.0433404685261908	0.837000663400563	neither	148
Ndufaf2	2	0.168265374633004	0.387607586451959	0.0589869526927	0.756165471732491	neither	147
Bola2	2	0.159835183103065	0.37470797895823	0.107532879077437	0.456819533183128	neither	144
Chgb	2	-0.0513625230118301	0.832065448476012	-0.0444167876887394	0.835499216110483	neither	144
Psmd4	2	0.193922969021615	0.296484062103787	0.0865135013203301	0.659197866323535	neither	144
Cbarp	2	0.111835455732237	0.597817364490524	0.0509752268801833	0.802128113489335	neither	143
Erp29	2	0.200397312510606	0.283157344918269	0.0706478361039899	0.706037623668845	neither	142
Pomgnt2	2	-0.0482394017774761	0.846784618396687	-0.0100813753518183	0.970515426787394	neither	142
Rab1a	3	0.00176916960996225	0.993665507056426	-0.0426876718608175	0.794880765289817	neither	975
Dzip3	3	-0.0346564739751324	0.88850837547751	-0.0500306994921261	0.755345262867714	neither	970
Nr1d2	3	-0.0234059075244542	0.928165781738463	-0.0395324093975212	0.826229930041571	neither	965
Zdhhc17	3	-0.0592227906327267	0.807194554713142	-0.0535874929894789	0.781383592731254	neither	960
Dpp10	3	-0.0441050716180128	0.859697334507765	-0.0628548924117457	0.752529944600109	neither	959
Nampt	3	-0.0451388497209914	0.854020128137317	-0.0383462551577986	0.836180336627621	neither	959
Cdc27	3	-0.0475122519959327	0.842649124483854	-0.0421762848888658	0.802128113489335	neither	949
Abca5	3	-0.0965754218654075	0.655877202224889	-0.0718490096645191	0.671589461138039	neither	945
Appbp2	3	-0.0543306266481921	0.826110549180504	-0.0467969543772754	0.811954879044364	neither	944
Mctp1	3	-0.042425070653269	0.865928139770984	-0.0671781310037835	0.683156196622386	neither	944
Slc38a2	4	-0.0063343526407584	0.982256375363639	-0.053583913978271	0.78185410148052	neither	951
Azin1	4	-0.0301581010354556	0.905716347462875	-0.0664275114755129	0.706897614231355	neither	942
Septin7	4	-0.0231254119795215	0.925777976603328	-0.0556074849086092	0.718314775941309	neither	925
Negr1	4	-0.0148094861125628	0.955745197261032	-0.0455301963598894	0.794641983736357	neither	920
Slc25a16	4	0.012892465921387	0.961307647124654	-0.0209661289674185	0.914491468980748	neither	914
Rab14	4	-0.0073297928409155	0.979953652827359	-0.0648831348412315	0.731902250093011	neither	912
Pten	4	-0.0339628465047654	0.888111718091387	-0.0464452237367822	0.774930846127118	neither	909
Slc6a15	4	0.0246602434196063	0.925427020032592	-0.0377426459799071	0.852056993581413	neither	909
Rab10	4	-0.0314640932736425	0.903539525372696	-0.063343024559063807	0.712646951850089	neither	890
Ythdc1	5	0.0531079594197189	0.830789927225332	0.0147676980434701	0.949885307022266	neither	202
Ccdc82	5	-0.294528685873148	0.0959670127432071	-0.0868721233928154	0.645471053415934	neither	135
Hpcal4	6	0.0514803227339028	0.793261182344462	0.031905048972778	0.891007279618119	neither	47
Parva	6	-0.0184481156267492	0.934708224237381	-0.00835293428297766	0.973778848557775	neither	45

## Sheet: Edgelist_PPI_Depdc5
10090.ENSMUSP00000099366	pp	10090.ENSMUSP00000100964
10090.ENSMUSP00000099366	pp	10090.ENSMUSP00000111479
10090.ENSMUSP00000027178	pp	10090.ENSMUSP00000039598
10090.ENSMUSP00000027178	pp	10090.ENSMUSP00000109552
10090.ENSMUSP00000030581	pp	10090.ENSMUSP00000099617
10090.ENSMUSP00000100872	pp	10090.ENSMUSP00000103028
10090.ENSMUSP00000041299	pp	10090.ENSMUSP00000130898
10090.ENSMUSP00000023812	pp	10090.ENSMUSP00000124710
10090.ENSMUSP00000034707	pp	10090.ENSMUSP00000100868
10090.ENSMUSP00000034707	pp	10090.ENSMUSP00000119356
10090.ENSMUSP00000034707	pp	10090.ENSMUSP00000049625
10090.ENSMUSP00000034707	pp	10090.ENSMUSP00000050771
10090.ENSMUSP00000034707	pp	10090.ENSMUSP00000100872
10090.ENSMUSP00000034707	pp	10090.ENSMUSP00000060054
10090.ENSMUSP00000034707	pp	10090.ENSMUSP00000116313
10090.ENSMUSP00000022609	pp	10090.ENSMUSP00000045812
10090.ENSMUSP00000022609	pp	10090.ENSMUSP00000048337
10090.ENSMUSP00000022609	pp	10090.ENSMUSP00000035930
10090.ENSMUSP00000022609	pp	10090.ENSMUSP00000025120
10090.ENSMUSP00000022609	pp	10090.ENSMUSP00000032237
10090.ENSMUSP00000022609	pp	10090.ENSMUSP00000047123
10090.ENSMUSP00000099361	pp	10090.ENSMUSP00000121032
10090.ENSMUSP00000006137	pp	10090.ENSMUSP00000027961
10090.ENSMUSP00000006137	pp	10090.ENSMUSP00000045073
10090.ENSMUSP00000034703	pp	10090.ENSMUSP00000050771
10090.ENSMUSP00000034703	pp	10090.ENSMUSP00000034707
10090.ENSMUSP00000034703	pp	10090.ENSMUSP00000108468
10090.ENSMUSP00000034703	pp	10090.ENSMUSP00000100868
10090.ENSMUSP00000070728	pp	10090.ENSMUSP00000113975
10090.ENSMUSP00000036705	pp	10090.ENSMUSP00000088618
10090.ENSMUSP00000043466	pp	10090.ENSMUSP00000099425
10090.ENSMUSP00000029175	pp	10090.ENSMUSP00000095866
10090.ENSMUSP00000029175	pp	10090.ENSMUSP00000075242
10090.ENSMUSP00000029175	pp	10090.ENSMUSP00000129491
10090.ENSMUSP00000029175	pp	10090.ENSMUSP00000085683
10090.ENSMUSP00000029175	pp	10090.ENSMUSP00000097874
10090.ENSMUSP00000029175	pp	10090.ENSMUSP00000097919
10090.ENSMUSP00000029175	pp	10090.ENSMUSP00000099952
10090.ENSMUSP00000029175	pp	10090.ENSMUSP00000105438
10090.ENSMUSP00000029175	pp	10090.ENSMUSP00000068895
10090.ENSMUSP00000029175	pp	10090.ENSMUSP00000092703
10090.ENSMUSP00000029175	pp	10090.ENSMUSP00000110777
10090.ENSMUSP00000029175	pp	10090.ENSMUSP00000134825
10090.ENSMUSP00000029175	pp	10090.ENSMUSP00000108468
10090.ENSMUSP00000029175	pp	10090.ENSMUSP00000034703
10090.ENSMUSP00000029175	pp	10090.ENSMUSP00000088618
10090.ENSMUSP00000068931	pp	10090.ENSMUSP00000104301
10090.ENSMUSP00000068931	pp	10090.ENSMUSP00000093959
10090.ENSMUSP00000059801	pp	10090.ENSMUSP00000097282
10090.ENSMUSP00000005064	pp	10090.ENSMUSP00000134169
10090.ENSMUSP00000005064	pp	10090.ENSMUSP00000009099
10090.ENSMUSP00000005064	pp	10090.ENSMUSP00000100872
10090.ENSMUSP00000034644	pp	10090.ENSMUSP00000099559
10090.ENSMUSP00000034644	pp	10090.ENSMUSP00000092624
10090.ENSMUSP00000034644	pp	10090.ENSMUSP00000036915
10090.ENSMUSP00000034644	pp	10090.ENSMUSP00000111479
10090.ENSMUSP00000034644	pp	10090.ENSMUSP00000093905
10090.ENSMUSP00000002825	pp	10090.ENSMUSP00000100868
10090.ENSMUSP00000002825	pp	10090.ENSMUSP00000025862
10090.ENSMUSP00000002825	pp	10090.ENSMUSP00000034707
10090.ENSMUSP00000002825	pp	10090.ENSMUSP00000060858
10090.ENSMUSP00000099425	pp	10090.ENSMUSP00000099952
10090.ENSMUSP00000099425	pp	10090.ENSMUSP00000105438
10090.ENSMUSP00000100868	pp	10090.ENSMUSP00000119356
10090.ENSMUSP00000100868	pp	10090.ENSMUSP00000104301
10090.ENSMUSP00000031490	pp	10090.ENSMUSP00000045201
10090.ENSMUSP00000031490	pp	10090.ENSMUSP00000076081
10090.ENSMUSP00000031490	pp	10090.ENSMUSP00000111479
10090.ENSMUSP00000031490	pp	10090.ENSMUSP00000049258
10090.ENSMUSP00000031490	pp	10090.ENSMUSP00000136287
10090.ENSMUSP00000087114	pp	10090.ENSMUSP00000111479
10090.ENSMUSP00000087114	pp	10090.ENSMUSP00000092624
10090.ENSMUSP00000075242	pp	10090.ENSMUSP00000105053
10090.ENSMUSP00000031588	pp	10090.ENSMUSP00000033383
10090.ENSMUSP00000030138	pp	10090.ENSMUSP00000060858
10090.ENSMUSP00000030138	pp	10090.ENSMUSP00000043519
10090.ENSMUSP00000030138	pp	10090.ENSMUSP00000032237
10090.ENSMUSP00000030138	pp	10090.ENSMUSP00000087896
10090.ENSMUSP00000030138	pp	10090.ENSMUSP00000047123
10090.ENSMUSP00000030138	pp	10090.ENSMUSP00000039688
10090.ENSMUSP00000030138	pp	10090.ENSMUSP00000048337
10090.ENSMUSP00000030138	pp	10090.ENSMUSP00000045812
10090.ENSMUSP00000030138	pp	10090.ENSMUSP00000035930
10090.ENSMUSP00000018274	pp	10090.ENSMUSP00000113975
10090.ENSMUSP00000018274	pp	10090.ENSMUSP00000097919
10090.ENSMUSP00000093905	pp	10090.ENSMUSP00000099559
10090.ENSMUSP00000100964	pp	10090.ENSMUSP00000131840
10090.ENSMUSP00000100964	pp	10090.ENSMUSP00000110748
10090.ENSMUSP00000036915	pp	10090.ENSMUSP00000111479
10090.ENSMUSP00000036915	pp	10090.ENSMUSP00000093905
10090.ENSMUSP00000036915	pp	10090.ENSMUSP00000099559
10090.ENSMUSP00000036915	pp	10090.ENSMUSP00000092624
10090.ENSMUSP00000105053	pp	10090.ENSMUSP00000110611
10090.ENSMUSP00000031167	pp	10090.ENSMUSP00000116313
10090.ENSMUSP00000031167	pp	10090.ENSMUSP00000031420
10090.ENSMUSP00000031167	pp	10090.ENSMUSP00000050771
10090.ENSMUSP00000031167	pp	10090.ENSMUSP00000084252
10090.ENSMUSP00000031167	pp	10090.ENSMUSP00000060858
10090.ENSMUSP00000031288	pp	10090.ENSMUSP00000047865
10090.ENSMUSP00000031288	pp	10090.ENSMUSP00000033290
10090.ENSMUSP00000060858	pp	10090.ENSMUSP00000084252
10090.ENSMUSP00000060858	pp	10090.ENSMUSP00000087896
10090.ENSMUSP00000060858	pp	10090.ENSMUSP00000070927
10090.ENSMUSP00000045201	pp	10090.ENSMUSP00000111479
10090.ENSMUSP00000045201	pp	10090.ENSMUSP00000103696
10090.ENSMUSP00000045201	pp	10090.ENSMUSP00000082844
10090.ENSMUSP00000045201	pp	10090.ENSMUSP00000076081
10090.ENSMUSP00000110748	pp	10090.ENSMUSP00000131840
10090.ENSMUSP00000047865	pp	10090.ENSMUSP00000068148
10090.ENSMUSP00000109500	pp	10090.ENSMUSP00000136287
10090.ENSMUSP00000076081	pp	10090.ENSMUSP00000111479
10090.ENSMUSP00000076081	pp	10090.ENSMUSP00000136287
10090.ENSMUSP00000034441	pp	10090.ENSMUSP00000046604
10090.ENSMUSP00000034441	pp	10090.ENSMUSP00000119949
10090.ENSMUSP00000024882	pp	10090.ENSMUSP00000032237
10090.ENSMUSP00000024882	pp	10090.ENSMUSP00000039688
10090.ENSMUSP00000024882	pp	10090.ENSMUSP00000048337
10090.ENSMUSP00000024882	pp	10090.ENSMUSP00000060858
10090.ENSMUSP00000024882	pp	10090.ENSMUSP00000035930
10090.ENSMUSP00000024882	pp	10090.ENSMUSP00000047123
10090.ENSMUSP00000024882	pp	10090.ENSMUSP00000045812
10090.ENSMUSP00000024733	pp	10090.ENSMUSP00000027921
10090.ENSMUSP00000024733	pp	10090.ENSMUSP00000029752
10090.ENSMUSP00000024733	pp	10090.ENSMUSP00000034441
10090.ENSMUSP00000013970	pp	10090.ENSMUSP00000100964
10090.ENSMUSP00000013970	pp	10090.ENSMUSP00000122422
10090.ENSMUSP00000013970	pp	10090.ENSMUSP00000020420
10090.ENSMUSP00000013970	pp	10090.ENSMUSP00000099425
10090.ENSMUSP00000013970	pp	10090.ENSMUSP00000099366
10090.ENSMUSP00000032237	pp	10090.ENSMUSP00000033290
10090.ENSMUSP00000032237	pp	10090.ENSMUSP00000035930
10090.ENSMUSP00000032237	pp	10090.ENSMUSP00000039688
10090.ENSMUSP00000032237	pp	10090.ENSMUSP00000047123
10090.ENSMUSP00000032237	pp	10090.ENSMUSP00000060858
10090.ENSMUSP00000032237	pp	10090.ENSMUSP00000045812
10090.ENSMUSP00000032237	pp	10090.ENSMUSP00000087896
10090.ENSMUSP00000032237	pp	10090.ENSMUSP00000048337
10090.ENSMUSP00000097919	pp	10090.ENSMUSP00000099952
10090.ENSMUSP00000097919	pp	10090.ENSMUSP00000105438
10090.ENSMUSP00000097919	pp	10090.ENSMUSP00000111306
10090.ENSMUSP00000097919	pp	10090.ENSMUSP00000108468
10090.ENSMUSP00000030170	pp	10090.ENSMUSP00000089051
10090.ENSMUSP00000030170	pp	10090.ENSMUSP00000106978
10090.ENSMUSP00000030170	pp	10090.ENSMUSP00000068178
10090.ENSMUSP00000030170	pp	10090.ENSMUSP00000035208
10090.ENSMUSP00000031388	pp	10090.ENSMUSP00000034644
10090.ENSMUSP00000031388	pp	10090.ENSMUSP00000111479
10090.ENSMUSP00000031388	pp	10090.ENSMUSP00000036915
10090.ENSMUSP00000031388	pp	10090.ENSMUSP00000099559
10090.ENSMUSP00000031388	pp	10090.ENSMUSP00000093905
10090.ENSMUSP00000031388	pp	10090.ENSMUSP00000092624
10090.ENSMUSP00000025408	pp	10090.ENSMUSP00000075762
10090.ENSMUSP00000025408	pp	10090.ENSMUSP00000041814
10090.ENSMUSP00000025955	pp	10090.ENSMUSP00000032237
10090.ENSMUSP00000021048	pp	10090.ENSMUSP00000048337
10090.ENSMUSP00000021048	pp	10090.ENSMUSP00000047123
10090.ENSMUSP00000021048	pp	10090.ENSMUSP00000032237
10090.ENSMUSP00000021048	pp	10090.ENSMUSP00000039688
10090.ENSMUSP00000021048	pp	10090.ENSMUSP00000071788
10090.ENSMUSP00000021048	pp	10090.ENSMUSP00000022609
10090.ENSMUSP00000021048	pp	10090.ENSMUSP00000035930
10090.ENSMUSP00000021048	pp	10090.ENSMUSP00000060858
10090.ENSMUSP00000021048	pp	10090.ENSMUSP00000024882
10090.ENSMUSP00000021048	pp	10090.ENSMUSP00000045812
10090.ENSMUSP00000021048	pp	10090.ENSMUSP00000087896
10090.ENSMUSP00000021048	pp	10090.ENSMUSP00000030138
10090.ENSMUSP00000021048	pp	10090.ENSMUSP00000070927
10090.ENSMUSP00000019283	pp	10090.ENSMUSP00000024882
10090.ENSMUSP00000083742	pp	10090.ENSMUSP00000136287
10090.ENSMUSP00000025649	pp	10090.ENSMUSP00000031167
10090.ENSMUSP00000025649	pp	10090.ENSMUSP00000050771
10090.ENSMUSP00000025649	pp	10090.ENSMUSP00000073778
10090.ENSMUSP00000025649	pp	10090.ENSMUSP00000134169
10090.ENSMUSP00000025649	pp	10090.ENSMUSP00000049258
10090.ENSMUSP00000025649	pp	10090.ENSMUSP00000030795
10090.ENSMUSP00000025649	pp	10090.ENSMUSP00000123865
10090.ENSMUSP00000025649	pp	10090.ENSMUSP00000040647
10090.ENSMUSP00000025649	pp	10090.ENSMUSP00000027856
10090.ENSMUSP00000025649	pp	10090.ENSMUSP00000052755
10090.ENSMUSP00000033383	pp	10090.ENSMUSP00000041299
10090.ENSMUSP00000035208	pp	10090.ENSMUSP00000106978
10090.ENSMUSP00000002529	pp	10090.ENSMUSP00000031167
10090.ENSMUSP00000002529	pp	10090.ENSMUSP00000018449
10090.ENSMUSP00000002529	pp	10090.ENSMUSP00000045073
10090.ENSMUSP00000002529	pp	10090.ENSMUSP00000047865
10090.ENSMUSP00000002529	pp	10090.ENSMUSP00000029158
10090.ENSMUSP00000023116	pp	10090.ENSMUSP00000041814
10090.ENSMUSP00000023116	pp	10090.ENSMUSP00000056502
10090.ENSMUSP00000023116	pp	10090.ENSMUSP00000059801
10090.ENSMUSP00000023116	pp	10090.ENSMUSP00000122103
10090.ENSMUSP00000023116	pp	10090.ENSMUSP00000063825
10090.ENSMUSP00000001548	pp	10090.ENSMUSP00000039633
10090.ENSMUSP00000001548	pp	10090.ENSMUSP00000029175
10090.ENSMUSP00000025862	pp	10090.ENSMUSP00000100868
10090.ENSMUSP00000025862	pp	10090.ENSMUSP00000119356
10090.ENSMUSP00000025862	pp	10090.ENSMUSP00000034707
10090.ENSMUSP00000025862	pp	10090.ENSMUSP00000050771
10090.ENSMUSP00000003876	pp	10090.ENSMUSP00000016115
10090.ENSMUSP00000003876	pp	10090.ENSMUSP00000042792
10090.ENSMUSP00000003876	pp	10090.ENSMUSP00000119356
10090.ENSMUSP00000075089	pp	10090.ENSMUSP00000103028
10090.ENSMUSP00000033483	pp	10090.ENSMUSP00000038983
10090.ENSMUSP00000027921	pp	10090.ENSMUSP00000029752
10090.ENSMUSP00000027921	pp	10090.ENSMUSP00000034441
10090.ENSMUSP00000001451	pp	10090.ENSMUSP00000075089
10090.ENSMUSP00000103028	pp	10090.ENSMUSP00000129279
10090.ENSMUSP00000022480	pp	10090.ENSMUSP00000056502
10090.ENSMUSP00000022480	pp	10090.ENSMUSP00000026196
10090.ENSMUSP00000022480	pp	10090.ENSMUSP00000023043
10090.ENSMUSP00000022480	pp	10090.ENSMUSP00000023116
10090.ENSMUSP00000042070	pp	10090.ENSMUSP00000066325
10090.ENSMUSP00000042070	pp	10090.ENSMUSP00000109552
10090.ENSMUSP00000045580	pp	10090.ENSMUSP00000068148
10090.ENSMUSP00000027502	pp	10090.ENSMUSP00000031490
10090.ENSMUSP00000027502	pp	10090.ENSMUSP00000082844
10090.ENSMUSP00000027502	pp	10090.ENSMUSP00000027512
10090.ENSMUSP00000027502	pp	10090.ENSMUSP00000111479
10090.ENSMUSP00000027502	pp	10090.ENSMUSP00000076081
10090.ENSMUSP00000027502	pp	10090.ENSMUSP00000045201
10090.ENSMUSP00000095433	pp	10090.ENSMUSP00000108961
10090.ENSMUSP00000001115	pp	10090.ENSMUSP00000095866
10090.ENSMUSP00000105438	pp	10090.ENSMUSP00000111479
10090.ENSMUSP00000023029	pp	10090.ENSMUSP00000134169
10090.ENSMUSP00000049414	pp	10090.ENSMUSP00000108468
10090.ENSMUSP00000001592	pp	10090.ENSMUSP00000100996
10090.ENSMUSP00000001592	pp	10090.ENSMUSP00000029175
10090.ENSMUSP00000001592	pp	10090.ENSMUSP00000070728
10090.ENSMUSP00000073778	pp	10090.ENSMUSP00000123865
10090.ENSMUSP00000038871	pp	10090.ENSMUSP00000123865
10090.ENSMUSP00000047333	pp	10090.ENSMUSP00000093959
10090.ENSMUSP00000037416	pp	10090.ENSMUSP00000112436
10090.ENSMUSP00000037416	pp	10090.ENSMUSP00000106978
10090.ENSMUSP00000027512	pp	10090.ENSMUSP00000045201
10090.ENSMUSP00000027512	pp	10090.ENSMUSP00000111479
10090.ENSMUSP00000027512	pp	10090.ENSMUSP00000076081
10090.ENSMUSP00000027512	pp	10090.ENSMUSP00000031490
10090.ENSMUSP00000027512	pp	10090.ENSMUSP00000082844
10090.ENSMUSP00000027512	pp	10090.ENSMUSP00000049258
10090.ENSMUSP00000003527	pp	10090.ENSMUSP00000047083
10090.ENSMUSP00000003527	pp	10090.ENSMUSP00000005749
10090.ENSMUSP00000003527	pp	10090.ENSMUSP00000031167
10090.ENSMUSP00000003527	pp	10090.ENSMUSP00000050771
10090.ENSMUSP00000003527	pp	10090.ENSMUSP00000116313
10090.ENSMUSP00000074862	pp	10090.ENSMUSP00000113862
10090.ENSMUSP00000074862	pp	10090.ENSMUSP00000136287
10090.ENSMUSP00000097874	pp	10090.ENSMUSP00000112436
10090.ENSMUSP00000097874	pp	10090.ENSMUSP00000099366
10090.ENSMUSP00000116313	pp	10090.ENSMUSP00000139610
10090.ENSMUSP00000027961	pp	10090.ENSMUSP00000030138
10090.ENSMUSP00000027961	pp	10090.ENSMUSP00000029013
10090.ENSMUSP00000027961	pp	10090.ENSMUSP00000048084
10090.ENSMUSP00000027961	pp	10090.ENSMUSP00000106801
10090.ENSMUSP00000027961	pp	10090.ENSMUSP00000045812
10090.ENSMUSP00000024575	pp	10090.ENSMUSP00000109500
10090.ENSMUSP00000026994	pp	10090.ENSMUSP00000029175
10090.ENSMUSP00000026994	pp	10090.ENSMUSP00000056040
10090.ENSMUSP00000060246	pp	10090.ENSMUSP00000097919
10090.ENSMUSP00000060246	pp	10090.ENSMUSP00000111306
10090.ENSMUSP00000035116	pp	10090.ENSMUSP00000063412
10090.ENSMUSP00000035116	pp	10090.ENSMUSP00000063825
10090.ENSMUSP00000027856	pp	10090.ENSMUSP00000123865
10090.ENSMUSP00000027856	pp	10090.ENSMUSP00000040647
10090.ENSMUSP00000027856	pp	10090.ENSMUSP00000052755
10090.ENSMUSP00000027856	pp	10090.ENSMUSP00000073778
10090.ENSMUSP00000047326	pp	10090.ENSMUSP00000099413
10090.ENSMUSP00000047326	pp	10090.ENSMUSP00000109552
10090.ENSMUSP00000047683	pp	10090.ENSMUSP00000102014
10090.ENSMUSP00000009099	pp	10090.ENSMUSP00000030775
10090.ENSMUSP00000009099	pp	10090.ENSMUSP00000134169
10090.ENSMUSP00000009099	pp	10090.ENSMUSP00000068931
10090.ENSMUSP00000009099	pp	10090.ENSMUSP00000060054
10090.ENSMUSP00000009099	pp	10090.ENSMUSP00000104301
10090.ENSMUSP00000009099	pp	10090.ENSMUSP00000093959
10090.ENSMUSP00000102014	pp	10090.ENSMUSP00000134169
10090.ENSMUSP00000025120	pp	10090.ENSMUSP00000045812
10090.ENSMUSP00000002121	pp	10090.ENSMUSP00000045073
10090.ENSMUSP00000002121	pp	10090.ENSMUSP00000018449
10090.ENSMUSP00000002121	pp	10090.ENSMUSP00000002529
10090.ENSMUSP00000002121	pp	10090.ENSMUSP00000031167
10090.ENSMUSP00000002121	pp	10090.ENSMUSP00000034707
10090.ENSMUSP00000002121	pp	10090.ENSMUSP00000082501
10090.ENSMUSP00000002121	pp	10090.ENSMUSP00000025862
10090.ENSMUSP00000002121	pp	10090.ENSMUSP00000003527
10090.ENSMUSP00000002121	pp	10090.ENSMUSP00000050771
10090.ENSMUSP00000002121	pp	10090.ENSMUSP00000005749
10090.ENSMUSP00000002121	pp	10090.ENSMUSP00000116313
10090.ENSMUSP00000035170	pp	10090.ENSMUSP00000038983
10090.ENSMUSP00000035170	pp	10090.ENSMUSP00000036705
10090.ENSMUSP00000033290	pp	10090.ENSMUSP00000048337
10090.ENSMUSP00000033290	pp	10090.ENSMUSP00000087896
10090.ENSMUSP00000033290	pp	10090.ENSMUSP00000045812
10090.ENSMUSP00000033290	pp	10090.ENSMUSP00000035930
10090.ENSMUSP00000033290	pp	10090.ENSMUSP00000060858
10090.ENSMUSP00000106978	pp	10090.ENSMUSP00000112436
10090.ENSMUSP00000027432	pp	10090.ENSMUSP00000041299
10090.ENSMUSP00000075916	pp	10090.ENSMUSP00000121032
10090.ENSMUSP00000068148	pp	10090.ENSMUSP00000112076
10090.ENSMUSP00000068148	pp	10090.ENSMUSP00000106801
10090.ENSMUSP00000068148	pp	10090.ENSMUSP00000096386
10090.ENSMUSP00000068148	pp	10090.ENSMUSP00000071788
10090.ENSMUSP00000040647	pp	10090.ENSMUSP00000052755
10090.ENSMUSP00000040647	pp	10090.ENSMUSP00000073778
10090.ENSMUSP00000040647	pp	10090.ENSMUSP00000123865
10090.ENSMUSP00000095866	pp	10090.ENSMUSP00000108468
10090.ENSMUSP00000039633	pp	10090.ENSMUSP00000068895
10090.ENSMUSP00000039633	pp	10090.ENSMUSP00000100964
10090.ENSMUSP00000045073	pp	10090.ENSMUSP00000047865
10090.ENSMUSP00000039517	pp	10090.ENSMUSP00000099361
10090.ENSMUSP00000039517	pp	10090.ENSMUSP00000097919
10090.ENSMUSP00000070119	pp	10090.ENSMUSP00000089051
10090.ENSMUSP00000005749	pp	10090.ENSMUSP00000116313
10090.ENSMUSP00000005749	pp	10090.ENSMUSP00000050771
10090.ENSMUSP00000005749	pp	10090.ENSMUSP00000033088
10090.ENSMUSP00000005749	pp	10090.ENSMUSP00000031167
10090.ENSMUSP00000001179	pp	10090.ENSMUSP00000018851
10090.ENSMUSP00000001179	pp	10090.ENSMUSP00000111306
10090.ENSMUSP00000003117	pp	10090.ENSMUSP00000036705
10090.ENSMUSP00000003117	pp	10090.ENSMUSP00000088618
10090.ENSMUSP00000033081	pp	10090.ENSMUSP00000116313
10090.ENSMUSP00000004202	pp	10090.ENSMUSP00000111306
10090.ENSMUSP00000004202	pp	10090.ENSMUSP00000134169
10090.ENSMUSP00000004202	pp	10090.ENSMUSP00000009099
10090.ENSMUSP00000026671	pp	10090.ENSMUSP00000111479
10090.ENSMUSP00000026671	pp	10090.ENSMUSP00000076081
10090.ENSMUSP00000026671	pp	10090.ENSMUSP00000113862
10090.ENSMUSP00000026671	pp	10090.ENSMUSP00000074862
10090.ENSMUSP00000026671	pp	10090.ENSMUSP00000136673
10090.ENSMUSP00000026671	pp	10090.ENSMUSP00000136287
10090.ENSMUSP00000026671	pp	10090.ENSMUSP00000031490
10090.ENSMUSP00000026671	pp	10090.ENSMUSP00000109500
10090.ENSMUSP00000033088	pp	10090.ENSMUSP00000116313
10090.ENSMUSP00000023043	pp	10090.ENSMUSP00000130898
10090.ENSMUSP00000023043	pp	10090.ENSMUSP00000063825
10090.ENSMUSP00000023043	pp	10090.ENSMUSP00000056502
10090.ENSMUSP00000050771	pp	10090.ENSMUSP00000100868
10090.ENSMUSP00000050771	pp	10090.ENSMUSP00000116313
10090.ENSMUSP00000050771	pp	10090.ENSMUSP00000084252
10090.ENSMUSP00000050771	pp	10090.ENSMUSP00000132224
10090.ENSMUSP00000003461	pp	10090.ENSMUSP00000022480
10090.ENSMUSP00000003461	pp	10090.ENSMUSP00000056502
10090.ENSMUSP00000003461	pp	10090.ENSMUSP00000023116
10090.ENSMUSP00000003461	pp	10090.ENSMUSP00000026196
10090.ENSMUSP00000003461	pp	10090.ENSMUSP00000023043
10090.ENSMUSP00000048337	pp	10090.ENSMUSP00000070927
10090.ENSMUSP00000048337	pp	10090.ENSMUSP00000084252
10090.ENSMUSP00000048337	pp	10090.ENSMUSP00000087896
10090.ENSMUSP00000048337	pp	10090.ENSMUSP00000060858
10090.ENSMUSP00000047123	pp	10090.ENSMUSP00000048337
10090.ENSMUSP00000047123	pp	10090.ENSMUSP00000060858
10090.ENSMUSP00000047123	pp	10090.ENSMUSP00000084252
10090.ENSMUSP00000047123	pp	10090.ENSMUSP00000087896
10090.ENSMUSP00000060054	pp	10090.ENSMUSP00000104301
10090.ENSMUSP00000060054	pp	10090.ENSMUSP00000100868
10090.ENSMUSP00000060054	pp	10090.ENSMUSP00000104892
10090.ENSMUSP00000060054	pp	10090.ENSMUSP00000093959
10090.ENSMUSP00000060054	pp	10090.ENSMUSP00000068931
10090.ENSMUSP00000017783	pp	10090.ENSMUSP00000113521
10090.ENSMUSP00000049258	pp	10090.ENSMUSP00000076081
10090.ENSMUSP00000049258	pp	10090.ENSMUSP00000087114
10090.ENSMUSP00000049258	pp	10090.ENSMUSP00000111479
10090.ENSMUSP00000018851	pp	10090.ENSMUSP00000109552
10090.ENSMUSP00000018851	pp	10090.ENSMUSP00000095433
10090.ENSMUSP00000018851	pp	10090.ENSMUSP00000060246
10090.ENSMUSP00000018851	pp	10090.ENSMUSP00000066325
10090.ENSMUSP00000018851	pp	10090.ENSMUSP00000042070
10090.ENSMUSP00000018851	pp	10090.ENSMUSP00000047326
10090.ENSMUSP00000043828	pp	10090.ENSMUSP00000111306
10090.ENSMUSP00000039688	pp	10090.ENSMUSP00000087896
10090.ENSMUSP00000039688	pp	10090.ENSMUSP00000048337
10090.ENSMUSP00000039688	pp	10090.ENSMUSP00000060858
10090.ENSMUSP00000039688	pp	10090.ENSMUSP00000045812
10090.ENSMUSP00000039688	pp	10090.ENSMUSP00000047123
10090.ENSMUSP00000088618	pp	10090.ENSMUSP00000089051
10090.ENSMUSP00000088618	pp	10090.ENSMUSP00000095866
10090.ENSMUSP00000088618	pp	10090.ENSMUSP00000101341
10090.ENSMUSP00000015239	pp	10090.ENSMUSP00000027856
10090.ENSMUSP00000015239	pp	10090.ENSMUSP00000073778
10090.ENSMUSP00000015239	pp	10090.ENSMUSP00000025649
10090.ENSMUSP00000015239	pp	10090.ENSMUSP00000123865
10090.ENSMUSP00000015239	pp	10090.ENSMUSP00000052755
10090.ENSMUSP00000016323	pp	10090.ENSMUSP00000105438
10090.ENSMUSP00000016323	pp	10090.ENSMUSP00000099952
10090.ENSMUSP00000052755	pp	10090.ENSMUSP00000073778
10090.ENSMUSP00000052755	pp	10090.ENSMUSP00000123865
10090.ENSMUSP00000099413	pp	10090.ENSMUSP00000109552
10090.ENSMUSP00000099413	pp	10090.ENSMUSP00000110611
10090.ENSMUSP00000096386	pp	10090.ENSMUSP00000112076
10090.ENSMUSP00000031766	pp	10090.ENSMUSP00000034441
10090.ENSMUSP00000030795	pp	10090.ENSMUSP00000045812
10090.ENSMUSP00000030795	pp	10090.ENSMUSP00000048337
10090.ENSMUSP00000030795	pp	10090.ENSMUSP00000070927
10090.ENSMUSP00000032856	pp	10090.ENSMUSP00000063825
10090.ENSMUSP00000029752	pp	10090.ENSMUSP00000034441
10090.ENSMUSP00000045812	pp	10090.ENSMUSP00000084252
10090.ENSMUSP00000045812	pp	10090.ENSMUSP00000071788
10090.ENSMUSP00000045812	pp	10090.ENSMUSP00000060858
10090.ENSMUSP00000045812	pp	10090.ENSMUSP00000070927
10090.ENSMUSP00000045812	pp	10090.ENSMUSP00000047123
10090.ENSMUSP00000045812	pp	10090.ENSMUSP00000075762
10090.ENSMUSP00000045812	pp	10090.ENSMUSP00000048337
10090.ENSMUSP00000045812	pp	10090.ENSMUSP00000087896
10090.ENSMUSP00000029759	pp	10090.ENSMUSP00000050771
10090.ENSMUSP00000029759	pp	10090.ENSMUSP00000031167
10090.ENSMUSP00000063412	pp	10090.ENSMUSP00000131735
10090.ENSMUSP00000035930	pp	10090.ENSMUSP00000129279
10090.ENSMUSP00000035930	pp	10090.ENSMUSP00000048337
10090.ENSMUSP00000035930	pp	10090.ENSMUSP00000047123
10090.ENSMUSP00000035930	pp	10090.ENSMUSP00000039688
10090.ENSMUSP00000035930	pp	10090.ENSMUSP00000060858
10090.ENSMUSP00000035930	pp	10090.ENSMUSP00000045812
10090.ENSMUSP00000035930	pp	10090.ENSMUSP00000087896
10090.ENSMUSP00000048084	pp	10090.ENSMUSP00000068148
10090.ENSMUSP00000048084	pp	10090.ENSMUSP00000106801
10090.ENSMUSP00000048084	pp	10090.ENSMUSP00000134169
10090.ENSMUSP00000018449	pp	10090.ENSMUSP00000050771
10090.ENSMUSP00000018449	pp	10090.ENSMUSP00000030795
10090.ENSMUSP00000018449	pp	10090.ENSMUSP00000033290
10090.ENSMUSP00000018449	pp	10090.ENSMUSP00000029158
10090.ENSMUSP00000018449	pp	10090.ENSMUSP00000047865
10090.ENSMUSP00000018449	pp	10090.ENSMUSP00000031167
10090.ENSMUSP00000018449	pp	10090.ENSMUSP00000031288
10090.ENSMUSP00000018449	pp	10090.ENSMUSP00000045073
10090.ENSMUSP00000056502	pp	10090.ENSMUSP00000059801
10090.ENSMUSP00000043519	pp	10090.ENSMUSP00000060858
10090.ENSMUSP00000043519	pp	10090.ENSMUSP00000113503
10090.ENSMUSP00000043519	pp	10090.ENSMUSP00000045812
10090.ENSMUSP00000043519	pp	10090.ENSMUSP00000048337
10090.ENSMUSP00000087371	pp	10090.ENSMUSP00000099366
10090.ENSMUSP00000099952	pp	10090.ENSMUSP00000105438
10090.ENSMUSP00000099952	pp	10090.ENSMUSP00000111479
10090.ENSMUSP00000099617	pp	10090.ENSMUSP00000105438
10090.ENSMUSP00000099617	pp	10090.ENSMUSP00000099952
10090.ENSMUSP00000099617	pp	10090.ENSMUSP00000125251
10090.ENSMUSP00000006112	pp	10090.ENSMUSP00000029175
10090.ENSMUSP00000039598	pp	10090.ENSMUSP00000111479
10090.ENSMUSP00000039598	pp	10090.ENSMUSP00000122422
10090.ENSMUSP00000016115	pp	10090.ENSMUSP00000025649
10090.ENSMUSP00000016115	pp	10090.ENSMUSP00000119356
10090.ENSMUSP00000016115	pp	10090.ENSMUSP00000030775
10090.ENSMUSP00000048063	pp	10090.ENSMUSP00000112436
10090.ENSMUSP00000080739	pp	10090.ENSMUSP00000128446
10090.ENSMUSP00000066325	pp	10090.ENSMUSP00000109552
10090.ENSMUSP00000113862	pp	10090.ENSMUSP00000136287
10090.ENSMUSP00000004133	pp	10090.ENSMUSP00000129279
10090.ENSMUSP00000004133	pp	10090.ENSMUSP00000114115
10090.ENSMUSP00000029013	pp	10090.ENSMUSP00000124710
10090.ENSMUSP00000029013	pp	10090.ENSMUSP00000068148
10090.ENSMUSP00000029013	pp	10090.ENSMUSP00000106801
10090.ENSMUSP00000029013	pp	10090.ENSMUSP00000048084
10090.ENSMUSP00000111479	pp	10090.ENSMUSP00000122422
10090.ENSMUSP00000111479	pp	10090.ENSMUSP00000136287
10090.ENSMUSP00000016125	pp	10090.ENSMUSP00000026671
10090.ENSMUSP00000031420	pp	10090.ENSMUSP00000050771
10090.ENSMUSP00000041543	pp	10090.ENSMUSP00000119949
10090.ENSMUSP00000041543	pp	10090.ENSMUSP00000046358
10090.ENSMUSP00000026196	pp	10090.ENSMUSP00000031766
10090.ENSMUSP00000026196	pp	10090.ENSMUSP00000063825
10090.ENSMUSP00000020420	pp	10090.ENSMUSP00000128446
10090.ENSMUSP00000020420	pp	10090.ENSMUSP00000080739
10090.ENSMUSP00000085683	pp	10090.ENSMUSP00000109552
10090.ENSMUSP00000085683	pp	10090.ENSMUSP00000108468
10090.ENSMUSP00000026292	pp	10090.ENSMUSP00000108961
10090.ENSMUSP00000026292	pp	10090.ENSMUSP00000124710
10090.ENSMUSP00000019662	pp	10090.ENSMUSP00000020420
10090.ENSMUSP00000019662	pp	10090.ENSMUSP00000080739
10090.ENSMUSP00000030775	pp	10090.ENSMUSP00000093959
10090.ENSMUSP00000030775	pp	10090.ENSMUSP00000060054
10090.ENSMUSP00000030775	pp	10090.ENSMUSP00000068931
10090.ENSMUSP00000029542	pp	10090.ENSMUSP00000050771
10090.ENSMUSP00000029542	pp	10090.ENSMUSP00000031167
10090.ENSMUSP00000113521	pp	10090.ENSMUSP00000134825
10090.ENSMUSP00000093959	pp	10090.ENSMUSP00000104301
10090.ENSMUSP00000092624	pp	10090.ENSMUSP00000111479
10090.ENSMUSP00000092624	pp	10090.ENSMUSP00000093905
10090.ENSMUSP00000092624	pp	10090.ENSMUSP00000099559
