# Supplementary material for: Translatome profiling in fatal familial insomnia implicates TOR signaling in somatostatin neurons
Source: Life Sci Alliance. 2022 Oct 3;5(11):e202201530. doi: 10.26508/lsa.202201530 (PMC9531780; doi:10.26508/lsa.202201530)
Supplement: Supplementary file 6 [file LSA-2022-01530_TableS6.xlsx]

## Sheet: Module_1_BP
Term	Overlap	P.value	Adjusted.P.value	Old.P.value	Old.Adjusted.P.value	Odds.Ratio	Combined.Score	Genes
protein phosphorylation (GO:0006468)	135/496	6.09311e-16	2.54824e-12	0	0	2.43348	85.2551	CCNH;STK19;NRBP2;STK11;TBK1;AKT2;RPS6KA2;STK16;AKT1;PDK3;PIM2;PRKACA;EPHB1;STK32C;PDK2;MAP3K5;EPHB3;PRKCG;MAP2K1;DAPK1;DAPK3;PRKCD;LMTK3;MATK;LMTK2;CSNK1D;CSNK1E;NRBP1;BCR;ILF3;PRKAR1B;DGKQ;TYRO3;SIK3;ULK1;CSNK1G2;CDKL1;BRSK1;BRSK2;PXK;CTBP1;PIK3R4;PRKCZ;TTBK1;NUAK1;GRK3;GRK2;IRAK1;GRK6;MARK4;MARK2;MARK1;CDK18;EIF2AK1;PLK2;PTK2;CLK3;SRPK1;CLK2;SMAD7;CDK9;STK24;STK25;WNK2;CDK10;MAP3K10;MAP3K11;CDK…
phosphorylation (GO:0016310)	115/400	1.36189e-15	2.54824e-12	0	0	2.61741	89.5938	DGKG;DGKD;CERK;STK19;NRBP2;STK11;TBK1;AKT1;PDK3;PIM2;PRKACA;PDK2;MAP3K5;PRKCG;MAP2K1;EPHA7;DAPK1;DAPK3;PRKCD;LMTK3;MATK;LMTK2;CSNK1D;CSNK1E;DGKZ;NRBP1;BCR;ILF3;PRKAR1B;DGKQ;SIK3;ULK1;CSNK1G2;CDKL1;BRSK1;BRSK2;PXK;CTBP1;PIK3R4;PRKCZ;TTBK1;NUAK1;GRK3;GRK2;IRAK1;GRK6;MARK4;MARK2;MARK1;CDK18;PLK2;TNK2;CLK3;SRPK1;CLK2;CDK9;STK24;STK25;WNK2;PI4KA;CDK10;MAP3K11;CDK16;MAP3K12;FGFR1;LRRK2;MAST2;MAST1;PRKA…
cellular protein modification process (GO:0006464)	231/1025	1.57008e-15	2.54824e-12	0	0	1.91548	65.2941	KEAP1;DCAF8;DCAF5;DCAF4;DCAF7;DCAF6;GOLGA2;NUB1;PSMD7;TBK1;AKT2;PSMD2;OGFOD1;AKT1;PSMD1;PDK3;FBXO6;PRKACA;BTRC;FBXO7;PDK2;PRKCG;COG7;DAPK1;DAPK3;PRKCD;CSNK1D;ALG1;CSNK1E;BCR;PRKAR1B;ADPRH;MXRA8;SIK3;ULK1;OBSL1;MTMR2;MTMR3;CTBP1;PIK3R4;MTMR4;PRKCZ;TTBK1;MTMR7;NUAK1;ST3GAL5;PSMF1;ATG7;ST3GAL2;CDK18;ICMT;PTPRN2;PLK2;SRPK1;PPP5C;WNK2;CDK10;BAP1;CDK16;PTPRU;PTPRS;SETD3;PRKAG2;AATK;PTPRM;WDR45;PTPRF;IK…
intracellular protein transport (GO:0006886)	93/336	7.73357e-12	9.41368e-09	0	0	2.46794	63.1433	IPO13;ARF3;RPAIN;C2CD5;AP2A1;PHB2;PKD1;IPO4;AP4M1;HERC2;IPO9;AKT2;XPO6;KIF13A;XPO5;TBC1D30;AKT1;ARFIP2;EVI5L;TNPO2;TBC1D22B;TNPO3;TBC1D10B;NUP214;NSF;SEC13;COG7;NUP133;STRADA;STRADB;VPS33A;VPS33B;TBC1D8;TSC2;TBC1D9;AP3B1;STX1B;OXA1L;ARL4D;ADPRH;PICK1;PREB;ARHGEF2;HAP1;SLU7;KPNB1;COPB2;POM121;COPA;RAB5B;TBC1D9B;RAB5C;STXBP1;COX18;STXBP2;KATNB1;AKAP6;VPS26B;PRICKLE1;TRAK1;DNAJC27;HDAC6;SCFD1;SNX27;…
modulation of chemical synaptic transmission (GO:0050804)	43/109	2.02456e-11	1.97152e-08	0	0	4.16606	102.581	NLGN3;PXK;NLGN2;CLSTN2;GRIK5;LRRK2;CAMK2A;CACNA1B;GRIK3;LRRC4;CACNA1A;ATP1A2;CPLX2;LRP8;SLC8A2;BEGAIN;ABR;RIMS3;GRM4;OPHN1;EIF4EBP2;DLGAP1;DLGAP3;DLGAP2;DLGAP4;CHRNB2;UNC13A;IQSEC2;SYT1;GRID1;MAPK8IP2;BTBD9;DGKZ;SYN1;BAIAP3;BCR;SLC8A3;STX1B;ARC;PSMC5;DLG4;AKAP9;NPTXR
regulation of autophagy (GO:0010506)	69/231	1.03518e-10	8.40047e-08	0	0	2.73478	62.8762	USP36;LRRK2;USP33;WDR41;KEAP1;PRKAG2;PIK3CB;GOLGA2;RPTOR;TRIM8;FLCN;UFL1;STK11;MLST8;TLK2;AKT1;WDR6;PIP4K2B;PIP4K2C;TRIM27;CAPN1;PIM2;PRKACA;WASHC1;RAB8A;RUBCN;DAPK1;FBXW7;DAPK3;ATG13;SIRT2;SREBF2;EXOC4;ATP6V1B2;ULK1;VDAC1;MAPT;ATP6V0D1;DEPDC5;ATF6;OPTN;USP13;MTMR3;NPRL2;GBA;ITPR1;MTMR9;HTRA2;PIK3R2;SNX32;VPS26B;MTMR4;FOXO3;HDAC6;ATG101;ORMDL3;EIF4E;ATP6V0A1;KDM4A;OSBPL7;BAD;PLK2;KLHL22;MTOR;RMC1…
neuron projection development (GO:0031175)	55/171	3.92302e-10	2.72874e-07	0	0	3.03657	65.7691	CNTNAP1;TRIO;CTNND2;LRRK2;RASGRF1;BICDL1;PTPRM;STMN4;FRY;PPP1R9B;SAMD14;ATCAY;ZFYVE27;OPHN1;DIP2A;EPHB1;NEFH;EPHB3;UNC5A;MAP1S;PRMT1;MINK1;MAPK8IP3;DNM2;ARC;ALS2;GPRIN1;RAB35;ULK1;MAPT;SGK1;SHANK3;GAS7;SHANK1;NYAP1;GBA;CAMSAP1;MICALL1;SRGAP2;MARK2;MAP4K4;WHRN;DAB2IP;L1CAM;MYO16;RAB11A;EHD1;TAOK3;DLG4;TAOK2;PLXNB1;ATXN10;FRYL;CDK16;ZPR1
regulation of intracellular signal transduction (GO:1902531)	107/437	6.40653e-10	3.89918e-07	0	0	2.09128	44.2693	TRIO;FAM13B;EHMT2;WWC1;ITSN1;ARHGAP39;NOC2L;ARHGAP35;ARHGAP44;PREX1;STK11;OPHN1;AKT1;PIP4K2B;PIP4K2C;PPP1R16B;USP7;RALBP1;USP2;OCRL;BCR;TIAM2;TIAM1;PRKAR1B;NGEF;OPTN;TELO2;MAPKAP1;NOP2;PIK3R2;KALRN;ABR;ARHGAP21;RHOT2;NUAK1;TMEM127;SMYD2;PIP5K1A;PIP5K1C;SRGAP3;SRGAP2;PDE2A;ARHGAP26;WDR54;ARHGAP23;ARHGAP33;ARHGAP32;PEX5L;NF2;PPP1R13B;LRRK2;RASGRF2;PAK1IP1;ARHGAP1;PRKAG2;CHD4;CHD3;AKAP12;FLCN;UFL1;I…
ubiquitin-dependent protein catabolic process (GO:0006511)	90/354	2.02759e-09	1.09693e-06	0	0	2.19314	43.8989	UBE3C;USP33;OTUD7A;KEAP1;RNF19B;ARRB1;UBE3B;PTPN23;FBXO21;FBXO22;HERPUD1;NUB1;CDC23;PSMD7;MAEA;PSMD2;WDR91;TRIM3;ARIH2;PSMD1;UFD1;BTRC;FBXO7;FBXW4;AREL1;FBXW5;ANAPC7;FBXW7;UBE4B;FBXO10;TRPC4AP;SIRT2;RNF40;DDB1;PSMA5;RNF167;PSMA4;IFI27;WDR81;UBE2R2;KCTD10;ANAPC4;RBCK1;ANAPC1;ANAPC2;PSMD12;VCP;CUL3;UBR4;NEDD4L;UBR3;AGAP3;PSMA7;BAG6;RMND5B;ZNRF1;FZR1;MTA1;OS9;HECTD3;MVB12B;ZSWIM8;PSMF1;BUB3;DCAF11;R…
cellular protein localization (GO:0034613)	85/329	2.48399e-09	1.16125e-06	0	0	2.23948	44.3717	ARF3;PTPRU;CNTNAP1;LRRK2;ITSN1;AP2A1;PRPF19;WDR45;BICD2;AP4M1;HERC2;KIF13A;TBC1D30;ARFIP2;CEP250;EVI5L;TBC1D22B;BBS4;TBC1D10B;NSF;SEC13;COG7;USP4;VPS33A;ATG9A;VPS33B;TBC1D8;TBC1D9;AP3B1;WIPI2;ATG13;STX1B;OXA1L;ARL4D;ADPRH;PIGK;PICK1;ARHGEF2;SLU7;COPB2;COPA;RAB5B;TBC1D9B;RAB5C;STXBP1;COX18;STXBP2;VPS26B;DNAJC27;TM9SF4;CORO1B;HDAC6;SCFD1;SNX27;SCFD2;NPHP1;STX6;TBC1D13;MFN2;TBC1D17;RAB6B;TBC1D15;SEC…
protein ubiquitination (GO:0016567)	121/525	2.62349e-09	1.16125e-06	0	0	1.9336	38.2055	UBE3C;FBXO25;RNF19B;KEAP1;UBE3B;FBXO21;UBE2Z;FBXO22;RNF112;NPEPPS;NUB1;PSMD7;CDC23;HERC2;RUSC1;PSMD2;PSMD1;FBXO6;TRIM26;TRIM27;BTRC;FBXO7;FBXW4;VPS18;USP7;AREL1;FBXW5;ANAPC7;FBXW8;USP5;FBXW7;MUL1;LMO7;UBE4B;FBXO10;TRPC4AP;RNF40;KCTD10;RBCK1;CUL9;KLHL18;CUL7;PSMD12;VCP;CUL3;CUL2;CTR9;MYCBP2;CUL1;NEDD4L;UBR3;DTX1;WDR61;UBR2;KLHL12;DTX3;FBXO41;UBR5;VPS11;PSMF1;BRAP;KLHL22;FBXO31;UBE2S;CDC16;PAF1;UBE…
regulation of mitotic cell cycle (GO:0007346)	54/178	5.90291e-09	2.39511e-06	0	0	2.78667	52.8014	INTS13;HNRNPU;CDC23;MAEA;PSMD7;PSMD2;PSMD1;PIM2;BTRC;TMEM8B;PRMT5;ANAPC7;ANGEL2;DAPK3;USP2;SCRIB;RNF40;DDB1;PSMA5;PSMA4;ANAPC4;OBSL1;ANAPC1;ANAPC2;CUL9;CUL7;PSMD12;CUL1;TTL;PSMA7;BRINP2;FZR1;BRINP1;HSF1;PSMF1;BUB3;EIF4E;RNF20;USP22;GBF1;ASNS;CDK11B;CDK9;PSMC5;PSMC6;ERCC3;PSMC3;UBE2S;PSMC4;PSMC1;CDC16;ERCC2;PSMC2;CDK10
regulation of neurotransmitter receptor activity (GO:0099601)	26/58	7.74094e-09	2.89928e-06	0	0	5.17305	96.6157	CAMK2B;GRIA1;NLGN2;CAMK2A;BEGAIN;CACNG7;GSG1L;PTK2B;DLGAP1;CAPN1;DLGAP3;CACNG2;DLGAP2;CACNG4;DLGAP4;LYNX1;DAPK1;MINK1;MAPK8IP2;GRIN2B;SHISA7;DLG3;DLG4;AKAP9;NPTXR;SHANK1
regulation of mitotic cell cycle phase transition (GO:1901990)	55/188	1.76926e-08	5.52279e-06	0	0	2.64581	47.2281	PKD1;PPP1R9B;ACTR1A;CDC23;PSMD7;TUBA1A;PSMD2;CEP250;PSMD1;BTRC;PRKACA;CDK5RAP2;HSP90AA1;ANAPC7;CEP131;CSNK1D;CSNK1E;TUBG1;CKAP5;TUBA4A;SIRT2;DDB1;PSMA5;PSMA4;AKAP9;ANAPC4;CEP63;ANAPC1;ANAPC2;KLHL18;PSMD12;DCTN1;CUL3;CUL1;PSMA7;FZR1;PSMF1;BUB3;PCNT;CLASP1;DYNC1H1;PLK5;ODF2;TUBB4B;TUBB4A;PSMC5;PSMC6;ERCC3;PSMC3;UBE2S;PSMC4;PSMC1;CDC16;ERCC2;PSMC2
peptidyl-serine modification (GO:0018209)	51/169	1.87629e-08	5.52279e-06	0	0	2.76356	49.1675	GALNT16;MAST3;LRRK2;MAST2;MAST1;PKD1;IKBKB;TBK1;CAMKV;AKT2;RPS6KA2;TLK2;AKT1;PDK3;PRKACA;STK32C;PRKCG;PARP1;PRKCD;LMTK2;CSNK1D;CSNK1E;DGKQ;ULK1;GAS6;SGK1;CSNK1G2;CAMK1G;BRSK1;PNCK;ROCK2;CAMK2A;PRKCZ;TTBK1;GRK2;MGAT5B;MKNK2;MAPK1;MARK2;MARK1;PLK2;MAPK14;MTOR;PINK1;SBK1;CAMK4;RPS6KB2;MAP3K10;PKN1;MAP3K12;TAF1
activation of GTPase activity (GO:0090630)	37/105	1.88162e-08	5.52279e-06	0	0	3.47117	61.7471	TBC1D9B;RASGRF1;SIPA1L2;SIPA1L3;RAP1GAP;CORO1C;ABR;SIPA1L1;TBC1D30;TBC1D13;PIP5K1A;EVI5L;TBC1D17;TBC1D22B;TBC1D15;TBC1D10B;TBC1D16;GARNL3;RAP1GAP2;APC2;BCAS3;RALGAPA1;TBC1D8;TBC1D9;SCRIB;TSC1;RANGAP1;MTSS2;BCR;TIAM2;SGSM1;TIAM1;RALGAPB;SGSM3;ADPRH;SGSM2;NGEF
negative regulation of macroautophagy (GO:0016242)	16/26	1.92827e-08	5.52279e-06	0	0	10.1624	180.525	USP36;RUBCN;LRRK2;CLEC16A;TSC2;TSC1;MTOR;NRBP2;SCFD1;PINK1;FEZ1;FEZ2;AKT1;QSOX1;LZTS1;UBQLN4
peptidyl-serine phosphorylation (GO:0018105)	48/156	2.46825e-08	6.67663e-06	0	0	2.84031	49.7541	BRSK1;PNCK;MAST3;ROCK2;LRRK2;MAST2;MAST1;CAMK2A;PRKCZ;PKD1;TTBK1;IKBKB;TBK1;GRK2;CAMKV;AKT2;RPS6KA2;MKNK2;TLK2;AKT1;PDK3;MAPK1;PRKACA;STK32C;MARK2;MARK1;PRKCG;PLK2;PRKCD;LMTK2;CSNK1D;CSNK1E;MAPK14;MTOR;PINK1;SBK1;DGKQ;CAMK4;RPS6KB2;MAP3K10;ULK1;PKN1;GAS6;SGK1;CSNK1G2;CAMK1G;MAP3K12;TAF1
glycerophospholipid biosynthetic process (GO:0046474)	52/177	3.68074e-08	9.43237e-06	0	0	2.65986	45.5303	DGKG;ARF3;SLC27A1;DGKD;CPNE7;MTMR14;CPNE6;PIK3CB;PIP4K2B;PIP4K2C;SBF1;PCYT1B;PCYT2;OCRL;DGKZ;PISD;INPP4A;RUFY1;GNPAT;PITPNM1;DGKQ;PITPNM3;PITPNM2;PIK3C3;PI4K2A;CDS1;MTMR2;MTMR3;ABHD8;PIK3R4;MTMR9;PIK3R2;MTMR4;AGPAT3;MTMR7;PGS1;GPAT4;INPP5E;INPP5J;INPP5K;PIP5K1A;PIP5K1C;RAB4A;AGK;DDHD2;SYNJ2;FIG4;SYNJ1;PI4KA;PI4KB;LPIN2;CDS2
neuron projection morphogenesis (GO:0048812)	44/140	4.6542e-08	1.13307e-05	0	0	2.92675	49.4121	BRSK1;SPTBN4;BRSK2;CNTNAP1;TRIO;NYAP1;CTNND2;LRRK2;ATL1;CELSR2;SLITRK1;DVL1;DIP2A;APBB1;SRGAP2;EPHB1;NEFH;RAB8A;EPHB3;MAP4K4;NTNG2;MAP1S;MINK1;DAB2IP;LMTK2;ANK3;MAPK8IP2;MYO16;DNM2;AFG3L2;ARC;ALS2;TAOK3;DLG4;ADGRB1;MAP1A;TAOK2;S100A6;PLXNB1;SGK1;DSCAML1;SHANK3;GAS7;SHANK1
regulation of vesicle-mediated transport (GO:0060627)	34/96	6.07223e-08	1.40789e-05	0	0	3.49574	58.0885	RAB5B;RAB5C;SRC;LRRK2;CPLX2;SCFD1;OPHN1;RAB26;MAPK1;PACSIN3;STXBP5;RAB8A;ATP9A;NSF;MBTPS1;MAP2K1;USP7;RAB4A;SYT1;LGI3;HIP1R;SEPTIN5;TSC2;DNAJC13;SEPTIN4;ARFGAP1;RAB11A;SYT7;RUFY1;RAB15;SNX17;RUFY2;CHMP3;HAP1
axonogenesis (GO:0007409)	64/240	6.38564e-08	1.41326e-05	0	0	2.32855	38.5763	CYFIP1;NRP2;HSP90AB1;USP33;PIK3CB;ARHGAP35;OPHN1;TUBB3;KIF5A;EPHB1;NEFH;RAB8A;EPHB3;SEMA6C;EPHA7;HSP90AA1;UNC5A;DSCAM;MAP1S;LMTK2;ANK3;SPTB;AFG3L2;FEZ1;ADGRB1;FEZ2;MAP1A;S100A6;ULK1;DSCAML1;SHANK3;B4GALT5;NLGN3;SPTBN4;BRSK1;BRSK2;SEMA7A;EPHA10;SRC;ATL1;LRTM2;SEMA3F;RAP1GAP;SLITRK1;SLIT1;MAPK1;FYN;NCAM1;PLCG1;APBB1;SPTBN2;NTNG2;SEMA4A;AUTS2;PTPN11;SEMA4F;SEMA4G;L1CAM;PTK2;EFNA3;PTPRA;TAOK2;CNTN2;G…
modification-dependent protein catabolic process (GO:0019941)	56/201	8.46878e-08	1.7928e-05	0	0	2.47017	40.2249	UBE3C;USP33;KEAP1;RNF19B;ARRB1;UBE3B;FBXO21;FBXO22;HERPUD1;NUB1;CDC23;WDR91;LONP1;ARIH2;UFD1;BTRC;FBXO7;FBXW4;AREL1;ANAPC7;UBE4B;FBXO10;TRPC4AP;RNF40;DDB1;RNF167;WDR81;UBE2R2;KCTD10;ANAPC4;ANAPC1;ANAPC2;CUL3;UBR4;NEDD4L;UBR3;BAG6;FZR1;OS9;PSMF1;BUB3;RNF130;UBQLN4;RNF20;UBE2I;ADRM1;FBXL14;PINK1;UBE2S;CDC16;KLHL8;PSMC2;TTC3;TRIP12;UBA1;TAF1
phosphatidylinositol metabolic process (GO:0046488)	37/112	1.28915e-07	2.61537e-05	0	0	3.14591	49.9071	CDS1;ARF3;SLC27A1;MTMR2;MTMR3;MTMR14;PIK3R4;MTMR9;PIK3R2;PIK3CB;MTMR4;MTMR7;INPP5E;INPP5J;INPP5K;PIP5K1A;PIP4K2B;PIP4K2C;PIP5K1C;PLCG1;SBF1;RAB4A;PLA2G4E;OCRL;SYNJ2;INPP4A;RUFY1;FIG4;PLCB3;SYNJ1;PITPNM1;PITPNM3;PITPNM2;PI4KA;PIK3C3;PI4KB;PI4K2A
phosphatidylinositol biosynthetic process (GO:0006661)	40/126	1.38039e-07	2.68845e-05	0	0	2.96738	46.872	CDS1;ARF3;SLC27A1;MTMR2;MTMR3;MTMR14;PIK3R4;MTMR9;PIGZ;PIK3R2;PIK3CB;MTMR4;MTMR7;INPP5E;INPP5J;INPP5K;PIP5K1A;PIP4K2B;PIP4K2C;PIP5K1C;SBF1;IP6K1;SOCS7;IP6K2;RAB4A;TTC7B;OCRL;SYNJ2;EFR3B;INPP4A;RUFY1;FIG4;SYNJ1;PITPNM1;PITPNM3;PITPNM2;PI4KA;PIK3C3;PI4KB;PI4K2A
protein polyubiquitination (GO:0000209)	77/314	1.46954e-07	2.752e-05	0	0	2.08319	32.7751	LRSAM1;UBE3C;RNF19B;UBE3B;PRPF19;FBXO21;FBXO22;NPEPPS;CDC23;PSMD7;UBE2Q1;RUSC1;PSMD2;TRIM3;ARIH2;PSMD1;FBXO6;TRIM27;BTRC;FBXO7;FBXW4;TRIM62;AREL1;FBXW5;ANAPC7;FBXW8;FBXW7;MUL1;LMO7;UBE4B;FBXO10;PSMA5;RNF167;PSMA4;IFI27;UBE2R2;ANAPC4;RBCK1;THOP1;ANAPC1;ANAPC2;PSMD12;PELI3;CUL3;CUL1;NEDD4L;UBR2;PSMA7;FBXO41;ZNRF1;FZR1;HECTD1;UBR5;PSMF1;RNF20;PPIL2;FBXO38;FBXL19;HUWE1;MIB2;WWP2;FBXL16;FBXL14;FBXO31;…
branched-chain amino acid catabolic process (GO:0009083)	13/20	1.70535e-07	2.90163e-05	0	0	11.7847	183.656	ACAD8;BCKDHA;MCCC2;ECHS1;MCCC1;ACADSB;HSD17B10;ACAT1;BCKDK;IVD;DBT;BCAT1;SLC25A44
branched-chain amino acid metabolic process (GO:0009081)	13/20	1.70535e-07	2.90163e-05	0	0	11.7847	183.656	ACAD8;BCKDHA;MCCC2;ECHS1;MCCC1;ACADSB;HSD17B10;ACAT1;BCKDK;IVD;DBT;BCAT1;SLC25A44
organelle organization (GO:0006996)	96/420	1.72823e-07	2.90163e-05	0	0	1.90373	29.6431	CNTNAP1;ALAS1;NUMA1;MAST3;LRRK2;MAST2;MAST1;PHB2;SIPA1L3;SYNE1;GOLGA2;RNF112;SEC61A1;SMPD4;CAPZB;ZMYM3;LONP1;MYO18A;LONP2;TRAPPC11;VPS18;BCAS3;CLUH;AGTPBP1;COG7;FBXW8;DST;PARP1;COG4;TANGO2;VPS13D;SIRT5;COG1;CSNK1D;WDR73;POLRMT;PPRC1;ANK1;HCFC1;GAK;PEX7;ARC;WDR81;BIN1;PEX6;TFAM;CHMP3;OBSL1;CHMP7;OPTN;PI4K2A;CUL7;ATL1;GBA;HSD17B10;CAMSAP1;NCKIPSD;STRIP1;ARHGAP21;RHOT2;STRIP2;MSTO1;VPS51;KIF3A;VPS11…
regulation of dephosphorylation (GO:0035303)	11/15	2.44324e-07	3.96538e-05	0	0	17.4406	265.529	PPP1R16B;MTMR2;MTMR3;SRC;PPP1R16A;MTMR9;INPP5K;MTMR4;SMG7;SMG5;SMG6
cellular response to starvation (GO:0009267)	46/158	2.94724e-07	4.62907e-05	0	0	2.62218	39.4303	BRSK1;BECN1;RIPOR1;BRSK2;MTMR3;SEH1L;EHMT2;NPRL2;LRRK2;USP33;NPRL3;CLEC16A;PIK3R4;PRKAG2;TCIRG1;FOXO3;WDR45;ZFYVE1;RPTOR;FLCN;NUAK1;SESN1;MLST8;MAPK1;GAS2L1;ATG7;GCN1;MAP3K5;SZT2;SEC13;WDR59;ASNS;WIPI2;ITFG2;SREBF2;MTOR;STK24;MYBBP1A;CASTOR2;VPS41;ATP6V1B2;PICK1;PIK3C3;ATP6V0D1;DEPDC5;KPTN
modulation of excitatory postsynaptic potential (GO:0098815)	15/27	3.55889e-07	5.41507e-05	0	0	7.93552	117.832	NLGN3;MTMR2;NLGN2;LRRK2;PRKCZ;SLC8A2;TMEM25;SLC8A3;STX1B;CUX2;DLG4;PTK2B;SHANK3;CBLN1;SHANK1
mRNA splicing, via spliceosome (GO:0000398)	68/274	4.81709e-07	6.91692e-05	0	0	2.11324	30.739	ISY1;EIF4A3;CELF4;DDX42;HNRNPU;PRPF19;PTBP1;SART1;METTL14;SART3;SNRNP70;MTREX;CTNNBL1;RBM5;RBM6;SRRM2;PRMT5;RBM17;IK;PRMT7;NCBP1;PRPF40B;TFIP11;PLRG1;GTF2F1;SRRM1;WDR77;PRPF6;DDX39B;HNRNPUL1;PSPC1;CD2BP2;SRSF4;CACTIN;SNRNP200;SLU7;ZCCHC8;SF3B3;RBM8A;DHX9;DDX1;SRRT;DDX23;PRCC;WBP4;U2AF1;PRPF8;U2AF1L4;RBM15B;POLR2A;POLR2B;TGS1;CSTF1;DHX38;DCPS;RBM10;SF3A3;CPSF7;CPSF1;CPSF3;CPSF2;SNUPN;SRPK1;SMU1;XA…
regulation of small GTPase mediated signal transduction (GO:0051056)	42/141	4.83006e-07	6.91692e-05	0	0	2.70658	39.3624	TRIO;FAM13B;SRC;RASGRF2;ITSN1;RASGRF1;ARHGAP1;ARHGAP39;PIK3R2;KALRN;ARHGAP35;ARHGAP44;PREX1;ABR;ARHGAP21;FLCN;RHOT2;OPHN1;MCF2L;SRGAP3;SRGAP2;ARHGEF11;RALBP1;ARHGEF17;PLEKHG5;OCRL;MYO9B;RHOF;ARHGAP26;ARHGAP23;BCR;TIAM2;ARHGAP33;TIAM1;ARHGAP32;DLC1;ARHGEF3;ARHGEF4;ARHGEF1;ARHGEF2;SOS2;NGEF
regulation of cellular localization (GO:0060341)	21/49	5.37321e-07	7.4749e-05	0	0	4.76742	68.8257	BRSK1;DYNC1H1;HSP90AA1;BRSK2;HSP90AB1;KDM1A;NUMA1;PARP1;LRRK2;WWC1;STXBP2;CSNK1E;NR1D1;TTL;PPM1F;ADCY5;PINK1;DVL1;TRIM46;MAD1L1;CDK16
histone modification (GO:0016570)	36/114	6.60507e-07	8.93336e-05	0	0	2.94156	41.8591	USP36;HDAC5;HDAC2;TRRAP;HDAC1;EHMT2;HDAC11;HDAC6;UFL1;MTA1;SIN3B;RUVBL2;MIER2;RUVBL1;BRD8;MTA2;ATXN7L3;MTA3;KDM4A;PRMT8;PRMT7;PRMT2;PRMT1;USP21;USP22;PRKCD;HUWE1;BAZ1B;SIRT2;KAT2A;BRMS1;KAT6B;INCENP;CARM1;TAF6;MAP3K12
regulation of trans-synaptic signaling (GO:0099177)	17/35	7.4787e-07	9.6551e-05	0	0	5.99806	84.6088	NLGN3;PXK;NLGN2;IQSEC2;GRID1;GRIK5;CACNA1B;GRIK3;LRRC4;CACNA1A;BTBD9;LRP8;BCR;ABR;ARC;PSMC5;EIF4EBP2
positive regulation of intracellular protein transport (GO:0090316)	43/148	7.5353e-07	9.6551e-05	0	0	2.61273	36.8356	USP36;RIPOR1;C2CD5;PPP1R13B;HDAC3;ICE1;MTCL1;HTRA2;PIK3R2;TM9SF4;NPEPPS;TRIM28;BAG3;AKT2;TPR;UBR5;ZIC1;VPS11;ARIH2;FYN;PCNT;BCAS3;TCAF1;JUP;FBXW7;BAD;KCNB1;SEC16A;CEP131;PRKCD;HPS4;HUWE1;ANK3;ATG13;SREBF2;PINK1;NMT1;ANP32B;GAS6;BAP1;RAPGEF3;RAN;ZPR1
positive regulation of GTPase activity (GO:0043547)	56/214	8.02688e-07	0.000100212	0	0	2.2652	31.7928	DOCK9;RASGRF1;SIPA1L2;SIPA1L3;FLCN;SIPA1L1;TBC1D30;MMUT;EVI5L;RGS8;TBC1D22B;RGS6;TBC1D10B;GARNL3;APC2;BCAS3;RALBP1;RALGAPA1;TBC1D8;TBC1D9;SCRIB;TSC1;RANGAP1;MTSS2;BCR;TIAM2;TIAM1;RALGAPB;ALS2;ADPRH;RAPGEF1;PKP4;RAPGEF6;NGEF;RAPGEF3;TBC1D9B;RAP1GAP;CORO1C;ABR;TBC1D13;PIP5K1A;SRGAP2;TBC1D17;TBC1D15;MAP4K4;TBC1D16;RAP1GAP2;RGP1;SGSM1;AFDN;SGSM3;SGSM2;NF1;PLXNB1;AGRN;RAB3GAP1
regulation of cellular response to heat (GO:1900034)	28/79	8.53842e-07	0.000103934	0	0	3.49424	48.8268	CAMK2B;POM121;HSP90AB1;SEH1L;CAMK2A;AAAS;CCAR2;RPTOR;HSPH1;BAG3;BAG1;HSF1;TPR;MLST8;MAPK1;NUP88;IER5;CAMK2G;RAE1;NUP214;HSP90AA1;SEC13;NUP133;RPA1;MTOR;DNAJC2;DNAJC7;MAPT
RNA export from nucleus (GO:0006405)	34/106	8.93236e-07	0.000106077	0	0	3.00847	41.9032	POM121;SEH1L;RBM8A;EIF4A3;U2AF1;AAAS;SMG7;SMG5;SMG6;U2AF1L4;GLE1;RBM15B;TPR;XPO5;DHX38;NUP88;EIF4E;RAE1;NUP214;UPF1;SEC13;CPSF1;NCBP1;NUP133;CPSF3;CPSF2;THOC3;THOC5;SRRM1;MCM3AP;DDX39B;SRSF4;SLU7;RAN
negative regulation of autophagy (GO:0010507)	23/59	1.19121e-06	0.000138095	0	0	4.06225	55.4113	USP36;RUBCN;KDM4A;LRRK2;MTMR9;KLHL22;TSC1;SIRT2;MTOR;GOLGA2;NRBP2;PINK1;SNRNP70;TLK2;AKT1;WDR6;QSOX1;LZTS1;WASHC1;ATG7;EIF4E;EIF4G3;EIF4G1
mRNA-containing ribonucleoprotein complex export from nucleus (GO:0071427)	32/99	1.53259e-06	0.00017354	0	0	3.04144	40.7204	POM121;SEH1L;RBM8A;EIF4A3;U2AF1;AAAS;SMG7;SMG5;SMG6;U2AF1L4;GLE1;RBM15B;TPR;DHX38;NUP88;EIF4E;RAE1;NUP214;UPF1;SEC13;CPSF1;NCBP1;NUP133;CPSF3;CPSF2;THOC3;THOC5;SRRM1;MCM3AP;DDX39B;SRSF4;SLU7
mRNA transport (GO:0051028)	33/104	1.68639e-06	0.000180484	0	0	2.96019	39.3495	POM121;SEH1L;RBM8A;EIF4A3;U2AF1;AAAS;SMG7;SMG5;SMG6;U2AF1L4;GLE1;RBM15B;TPR;DHX38;NUP88;EIF4E;RAE1;NUP214;UPF1;SEC13;CPSF1;NCBP1;NUP133;CPSF3;CPSF2;THOC3;THOC5;SRRM1;ARC;MCM3AP;DDX39B;SRSF4;SLU7
endocytic recycling (GO:0032456)	21/52	1.74946e-06	0.000180484	0	0	4.30531	57.0721	EIPR1;DENND1A;LMTK2;PTPN23;EHD1;EHD3;SNX27;VPS51;SNX17;VPS53;RAB35;MICALL1;VPS52;STX6;CCDC22;WASHC1;ANKRD50;RAB11FIP3;VPS39;RAB11FIP4;VPS35L
fatty acid beta-oxidation (GO:0006635)	21/52	1.74946e-06	0.000180484	0	0	4.30531	57.0721	GCDH;ACADVL;ACOT8;MECR;ECHS1;ECI2;ETFDH;HSD17B4;HSD17B10;MCAT;ACAT2;ACAT1;HADHB;HADHA;AMACR;ACOX1;IVD;ACADM;ACOX3;DECR2;CRAT
regulation of cell cycle phase transition (GO:1901987)	31/95	1.76829e-06	0.000180484	0	0	3.0839	40.8478	PSMD12;CUL1;PSMA7;FZR1;CDC23;PSMD7;PSMD2;PSMD1;BUB3;PSMF1;BTRC;ANAPC7;FBXW7;ATP2B4;DDB1;PSMA5;PSMC5;PSMA4;PSMC6;ERCC3;PSMC3;PSMC4;UBE2S;PSMC1;CDC16;ERCC2;PSMC2;ANAPC4;ANAPC1;ANAPC2;TAF1
positive regulation of proteasomal protein catabolic process (GO:1901800)	29/86	1.77926e-06	0.000180484	0	0	3.23815	42.8709	USP13;VCP;LRRK2;KEAP1;RNF19B;PRICKLE1;FBXO22;BAG6;DNAJB2;NUB1;HECTD1;DVL1;ARIH2;BBS7;OSBPL7;ZER1;USP5;FBXW7;DAB2IP;CSNK1D;CSNK1E;SIRT2;SMAD7;PSMC5;PSMC6;PSMC3;PSMC2;NOP53;TAF1
protein transport (GO:0015031)	83/369	2.27742e-06	0.000226301	0	0	1.85964	24.1613	ARF3;LRSAM1;ARHGAP1;MIA2;AP2A1;TCIRG1;AP4M1;HERC2;KIF13A;TBC1D30;ARFIP2;EVI5L;TBC1D22B;RAB8A;TBC1D10B;NSF;SEC13;COG7;TANGO2;VPS33A;VPS33B;TBC1D8;LMTK2;TBC1D9;AP3B1;ANK3;DNM2;RUFY1;STX1B;ARL4D;PREPL;ADPRH;ATP6V1B2;PICK1;CHMP3;PREB;ARHGEF2;ATP6V0D1;SLU7;OPTN;ABCG1;COPB2;COPA;RAB5B;TBC1D9B;RAB5C;STXBP1;STXBP2;VPS26B;DNAJC27;HDAC6;NEURL1B;SCFD1;SNX27;KIF3B;SCFD2;KIF3A;RAB26;STX6;TBC1D13;TBC1D17;RAB6B…
axon development (GO:0061564)	27/79	2.9859e-06	0.000290767	0	0	3.30324	42.0225	BRSK1;SPTBN4;BRSK2;AMIGO1;ATL1;ARHGAP35;SLITRK1;APBB1;NEFH;RAB8A;MARK2;EPHB3;NTNG2;MAP1S;LMTK2;ANK3;L1CAM;MAPK8IP3;AFG3L2;RTN4RL1;ADGRB1;MAP1A;TAOK2;S100A6;MAPT;DSCAML1;ZPR1
mRNA processing (GO:0006397)	70/300	3.61848e-06	0.000345458	0	0	1.94712	24.3963	ISY1;TCERG1;CCNH;EIF4A3;AKAP8L;DDX42;HNRNPU;PRPF19;PTBP1;SART1;METTL14;SART3;SNRNP70;MTREX;PRKACA;CMTR1;CTNNBL1;RBM5;RBM6;SRRM2;RBM17;IK;NCBP1;PRPF40B;THOC3;TFIP11;PLRG1;GTF2F1;THOC5;SRRM1;PRPF6;DDX39B;HNRNPUL1;PSPC1;CD2BP2;SRSF4;CACTIN;SNRNP200;SLU7;ZCCHC8;SF3B3;RBM8A;DHX9;SRRT;DDX23;PRCC;WBP4;U2AF1;PRPF8;TBRG4;U2AF1L4;RBM15B;POLR2A;POLR2B;CSTF1;DHX38;RBM10;SF3A3;CPSF7;CPSF1;CPSF3;CPSF2;GTF2H3;S…
chromatin remodeling (GO:0006338)	32/103	3.99773e-06	0.000374326	0	0	2.86942	35.6663	HDAC5;SMARCD1;KDM5C;HDAC2;SRCAP;HDAC1;CHD8;CHD4;BAZ2B;CHD3;RUVBL2;RUVBL1;MTA2;ZBTB7A;BPTF;MBD3;KDM4A;SMARCC1;KDM4B;SMARCC2;ACTL6B;ACTL6A;MBD2;ACTR8;BAZ1B;SMARCA2;GATAD2B;HCFC1;SMARCA4;KAT2A;TADA2A;EZH1
regulation of cellular response to stress (GO:0080135)	35/118	4.67544e-06	0.000429523	0	0	2.68579	32.9632	CAMK2B;POM121;SEH1L;HSP90AB1;ROCK2;CAMK2A;AAAS;CCAR2;USP19;CASP9;RPTOR;NUAK1;ING2;HSPH1;BAG3;BAG1;TPR;HSF1;MLST8;MAPK1;NUP88;CAMK2G;RAE1;NUP214;HSP90AA1;SEC13;NUP133;RPA1;CORO2B;MTOR;DNAJC2;PINK1;DNAJC7;MAPT;EIF4G1
MAPK cascade (GO:0000165)	70/303	5.22896e-06	0.000465896	0	0	1.92171	23.3705	LRRK2;RASGRF2;RASGRF1;PIK3CB;IKBKB;PSMD7;SYNGAP1;PSMD2;FNTB;PSMD1;BTRC;JAK1;MAP3K5;MEN1;MAP2K1;KSR1;MINK1;SPTB;DUSP7;PSMA5;MRAS;PSMA4;RASA3;RAF1;SHANK3;CAMK2B;SPTBN4;PSMD12;SHC2;CUL3;CAMK2A;CUL1;PIK3R2;RASAL1;PSMA7;CAMKK2;HSF1;MAPK1;FYN;NCAM1;PSMF1;MAP2K7;RALGDS;SPTBN2;MAP4K4;BRAP;ICMT;DAB2IP;GRIN2B;PTK2;SETX;MAPK11;PPP5C;PSMC5;PSMC6;PSMC3;TAOK3;DLG3;PSMC4;DLG4;PTPRA;PSMC1;PSMC2;TAOK2;NF1;GRB2;CC…
regulation of axonogenesis (GO:0050770)	20/51	5.26274e-06	0.000465896	0	0	4.09878	49.8201	BRSK1;LINGO1;BRSK2;GDI1;PLXND1;AMIGO1;ARHGAP35;TIAM2;TIAM1;MAG;SIPA1L1;SLITRK1;PLXNA2;PLXNA1;PLXNB2;PLXNB1;MARK2;PLXNA4;EPHB3;PLXNA3
positive regulation of synaptic transmission (GO:0050806)	25/73	6.59142e-06	0.000563046	0	0	3.31175	39.5084	NLGN3;NLGN2;CLSTN2;ADCY1;PRKCZ;SLC8A2;CACNG7;RIMS3;FLOT1;PTK2B;CACNG2;CACNG4;MPP2;SYT1;PLK2;GRIN2B;SHISA7;BAIAP3;SLC8A3;STX1B;ARC;DLG4;HAP1;SHANK3;SHANK2
regulation of hydrolase activity (GO:0051336)	25/73	6.59142e-06	0.000563046	0	0	3.31175	39.5084	PLXND1;CAMK2A;RAP1GAP;ARHGAP44;SIPA1L1;PLXNA2;PLXNA1;NOS1;PLXNA4;TBC1D15;EPHB3;TBC1D10B;PLXNA3;RALBP1;RDX;DAB2IP;OCRL;PTK2;NF1;PLXNB2;RAB3GAP2;PLXNB1;RAPGEF6;NGEF;RAB3GAP1
semaphorin-plexin signaling pathway involved in neuron projection guidance (GO:1902285)	9/13	6.96696e-06	0.000584864	0	0	14.2591	169.317	NRP2;PLXND1;PLXNA2;PLXNA1;PLXNB2;PLXNB1;SEMA3F;PLXNA4;PLXNA3
regulation of telomere maintenance via telomerase (GO:0032210)	20/52	7.45855e-06	0.00061552	0	0	3.97047	46.8759	CCT3;CTC1;CCT2;STN1;SRC;TINF2;PARN;HNRNPU;NAT10;TERF2;SMG5;SMG6;CCT6A;HMBOX1;EXOSC10;TCP1;MAPK1;MAP2K7;MAP3K4;CCT5
histone H4 acetylation (GO:0043967)	19/48	7.67389e-06	0.000622736	0	0	4.16133	49.0109	NAA60;ACTL6B;TRRAP;ACTL6A;JADE1;CHD5;JADE2;HCFC1;MSL1;PER1;KANSL1;RUVBL2;KANSL3;RUVBL1;TADA3;EP400;EPC1;APBB1;BRD8
cytosolic transport (GO:0016482)	34/116	8.45794e-06	0.000673434	0	0	2.64005	30.8368	BECN1;DCTN1;AP2A1;SNX32;VPS26B;PTPN23;AP4M1;CCDC91;VPS51;VPS53;WDR91;VPS52;STX6;TRIM27;TBC1D17;WASHC1;RAB6B;YKT6;TBC1D10B;SORT1;GBF1;LMTK2;RBSN;BAIAP3;GAK;RGP1;PREPL;EHD3;WDR81;HEATR5B;DOP1B;UBE2O;PIK3C3;CORO7
axon guidance (GO:0007411)	51/203	8.57526e-06	0.000673434	0	0	2.14114	24.9799	CYFIP1;NRP2;PLXND1;USP33;PTPRM;PIK3CB;ARHGAP35;OPHN1;TUBB3;KIF5A;EPHB1;EPHB3;SEMA6C;EPHA7;UNC5A;DSCAM;SPTB;FEZ1;FEZ2;DSCAML1;SHANK3;SPTBN4;SEMA7A;EPHA10;SRC;LRTM2;SEMA3F;RAP1GAP;PLXNA2;SLIT1;PLXNA1;MAPK1;FYN;NCAM1;PLCG1;PLXNA4;SPTBN2;PLXNA3;SEMA4A;PTPN11;SEMA4F;SEMA4G;L1CAM;PTK2;VEGFA;EFNA3;PTPRA;CNTN2;PLXNB2;GRB2;PLXNB1
synapse organization (GO:0050808)	36/126	8.80281e-06	0.000677505	0	0	2.54757	29.6548	NLGN3;CYFIP1;PTPRS;NLGN2;PLXND1;DCTN1;CTNND2;LRRK2;LRRC4;NRXN2;ARHGAP39;PTPRF;SLC8A2;SLITRK1;SPOCK2;DVL1;PPFIA4;PPFIA3;LRRC4B;UNC13B;UNC13A;DSCAM;ANK3;L1CAM;SLC8A3;CACNB3;LRFN5;LRFN4;CNTN2;MAPT;AGRN;OBSL1;SHANK3;SHANK2;ADGRL3;CBLN1
ribonucleoprotein complex assembly (GO:0022618)	38/136	8.90539e-06	0.000677505	0	0	2.47027	28.7264	ISY1;HSP90AB1;DHX9;DDX1;NOP2;CELF3;DDX23;PPAN;CELF4;CELF5;PWP2;PRPF19;SART1;SART3;TGS1;DENR;RBM5;PRMT5;CPSF7;HSP90AA1;PRMT7;NCBP1;SNUPN;NLE1;TARBP2;WDR77;SRPK1;SETX;TRAF7;BOP1;XAB2;PRPF6;DDX39B;EIF6;LUC7L3;SNRNP200;NOP53;EIF3A
positive regulation of histone modification (GO:0031058)	15/33	9.43807e-06	0.000706984	0	0	5.28851	61.1921	SAP30BP;PAXIP1;KDM1A;CTBP1;AKAP8L;ARRB1;CDK9;ING2;SART3;TADA2A;RUVBL2;PAF1;NOS1;BRD7;GLYR1
mRNA export from nucleus (GO:0006406)	32/107	9.73539e-06	0.000718206	0	0	2.71575	31.3391	POM121;SEH1L;RBM8A;EIF4A3;U2AF1;AAAS;SMG7;SMG5;SMG6;U2AF1L4;GLE1;RBM15B;TPR;DHX38;NUP88;EIF4E;RAE1;NUP214;UPF1;SEC13;CPSF1;NCBP1;NUP133;CPSF3;CPSF2;THOC3;THOC5;SRRM1;MCM3AP;DDX39B;SRSF4;SLU7
proteasome-mediated ubiquitin-dependent protein catabolic process (GO:0043161)	72/321	1.15048e-05	0.000836073	0	0	1.84925	21.0311	ARRB1;HERPUD1;CDC23;PSMD7;MAEA;PSMD2;TRIM3;PSMD1;UFD1;FBXO6;BTRC;FBXW4;AREL1;FBXW5;ANAPC7;FBXW7;UBE4B;SIRT2;DDB1;PSMA5;PSMA4;IFI27;KCTD10;ANAPC4;RBCK1;MAN1B1;ANAPC1;ANAPC2;PSMD12;VCP;CUL3;CUL2;CUL1;NEDD4L;UBR3;UBR2;AGAP3;PSMA7;USP19;ECPAS;BAG6;DNAJB2;RMND5B;ZNRF1;FZR1;MTA1;OS9;HECTD3;ZSWIM8;PSMF1;BUB3;DCAF11;FBXO38;FBXL19;HUWE1;KLHL22;WWP2;FBXL16;FBXL14;DNAJC18;FBXO31;SPSB3;PSMC5;PSMC6;PSMC3;PSMC…
positive regulation of transcription initiation from RNA polymerase II promoter (GO:0060261)	12/23	1.29016e-05	0.000923792	0	0	6.91831	77.8875	MED12;MED14;PSMC5;PAXIP1;MED24;PSMC6;PSMC3;PSMC4;SRF;PSMC2;MED16;MED17
regulation of cytoplasmic transport (GO:1903649)	8/11	1.35059e-05	0.000944918	0	0	16.8944	189.427	MAP2K1;USP7;SRC;LRRK2;CHMP3;MAPK1;DNAJC13;ATP9A
protein modification by small protein conjugation (GO:0032446)	87/409	1.35848e-05	0.000944918	0	0	1.73027	19.3904	FBH1;FBXO25;KEAP1;ARRB1;UBE2Z;RNF157;UFL1;NUB1;CDC23;HERC2;TRIM28;ENC1;ARIH2;TRIM26;TRIM27;BTRC;FBXO7;NUP214;PIAS4;VPS18;USP7;TRIM62;AREL1;FBXW5;ANAPC7;FBXW8;USP5;NUP133;EIPR1;FBXW7;MUL1;LMO7;FBXO10;RANGAP1;TRPC4AP;RNF40;DDB1;TRAF7;UBE2R2;KCTD10;PEX5;CUL9;KLHL18;POM121;CUL7;VCP;SEH1L;PCNA;MGRN1;CUL3;UBA5;CUL2;CTR9;MYCBP2;CUL1;NEDD4L;UBR3;DTX1;WDR61;UBR2;DTX3;AAAS;OS9;TPR;VPS11;ZSWIM8;NUP88;ATG7;R…
retrograde vesicle-mediated transport, Golgi to endoplasmic reticulum (GO:0006890)	27/85	1.40728e-05	0.000960026	0	0	2.96049	33.0724	ARF3;COPB2;COPA;NBAS;STX18;KLC1;BICD2;SCFD1;KLC2;KIF3B;KIF3A;KIF5A;KIF1C;KIF3C;ATP9B;RAB6B;ATP9A;SCYL1;NSF;COG7;COG4;GBF1;ARFGAP1;ARFGAP2;PICK1;COPG2;COPG1
protein autophosphorylation (GO:0046777)	42/159	1.41963e-05	0.000960026	0	0	2.28778	25.5374	DDR1;CAMK2B;SRC;LRRK2;CAMK2A;AATK;ACVR1B;CAMKK2;STK11;EEF2K;IRAK1;STK16;MKNK2;AKT1;PTK2B;PIM2;EPHB1;MARK2;EPHB3;DAPK1;EIF2AK1;DAPK3;MINK1;LMTK2;PTK2;MTOR;CLK2;PINK1;STK24;TAOK3;STK25;WNK2;CAMK4;TAOK2;TYRO3;MAP3K10;ULK1;ATP13A2;MAP3K11;FGFR1;MAP3K12;TAF1
establishment of protein localization to organelle (GO:0072594)	25/76	1.47138e-05	0.000978608	0	0	3.1164	34.6753	IPO13;RPAIN;RYR2;LRSAM1;POM121;PRICKLE1;PHB2;IPO4;HK1;NEURL1B;IPO9;TPR;AKT1;NUP88;TNPO2;TNPO3;NUP214;SEC13;NUP133;TSC2;RAB11A;PINK1;TSPAN17;KPNB1;RAN
regulation of G2/M transition of mitotic cell cycle (GO:0010389)	40/149	1.49056e-05	0.000978608	0	0	2.3381	25.9852	PSMD12;DCTN1;CUL1;PSMA7;ACTR1A;PSMD7;TUBA1A;PSMD2;CEP250;PSMD1;PSMF1;PRKACA;PCNT;CLASP1;CDK5RAP2;BRD4;USP47;DYNC1H1;HSP90AA1;ODF2;RCC2;CEP131;CSNK1D;CSNK1E;TUBG1;TUBB4B;CKAP5;TUBB4A;TUBA4A;RAB11A;PSMA5;PSMC5;PSMA4;PSMC6;PSMC3;PSMC4;PSMC1;AKAP9;PSMC2;CEP63
mitochondrion organization (GO:0007005)	45/175	1.50741e-05	0.000978608	0	0	2.20686	24.5017	ALAS1;LRRK2;TIMM9;GBA;SPG7;TRAK1;PHB2;HSD17B10;TIMM50;RHOT2;IMMP2L;ATCAY;SAMM50;PITRM1;AIFM1;MSTO1;LONP1;MFN2;USP30;FBXO7;AGTPBP1;MIGA2;CLUH;PARP1;VPS13D;MUL1;SIRT5;TIMM44;POLRMT;PPRC1;DNM1;HCFC1;PISD;DNM2;SUPV3L1;AFG3L2;OXA1L;PINK1;WDR81;ADCK1;TMEM11;DNAJA3;TFAM;NDUFS1;HAP1
RNA splicing, via transesterification reactions with bulged adenosine as nucleophile (GO:0000377)	59/251	1.60936e-05	0.00102518	0	0	1.96223	21.6573	ISY1;EIF4A3;DDX42;HNRNPU;PRPF19;PTBP1;SART1;METTL14;SART3;SNRNP70;MTREX;CTNNBL1;RBM5;RBM6;SRRM2;RBM17;IK;NCBP1;PRPF40B;TFIP11;PLRG1;GTF2F1;SRRM1;PRPF6;DDX39B;HNRNPUL1;PSPC1;CD2BP2;SRSF4;CACTIN;SNRNP200;SLU7;ZCCHC8;SF3B3;RBM8A;DHX9;SRRT;DDX23;PRCC;WBP4;U2AF1;PRPF8;U2AF1L4;RBM15B;POLR2A;POLR2B;CSTF1;DHX38;RBM10;SF3A3;CPSF7;CPSF1;CPSF3;CPSF2;SMU1;XAB2;SNRNP40;NOVA2;SUGP1
ATP-dependent chromatin remodeling (GO:0043044)	17/42	1.62126e-05	0.00102518	0	0	4.31685	47.6136	MBD3;HDAC2;SMARCC1;SMARCC2;SRCAP;ACTL6B;HDAC1;CHD8;ACTL6A;MBD2;CHD4;CHD3;ACTR8;SMARCA2;GATAD2B;SMARCA4;MTA2
macroautophagy (GO:0016236)	34/120	1.87575e-05	0.0011709	0	0	2.51667	27.3912	ILRUN;BECN1;VCP;MTMR3;SRC;MTMR14;PIK3R4;PRKAG2;TCIRG1;AMBRA1;ZFYVE1;ATG101;MFN2;PIP4K2B;ATG7;VPS39;VPS16;VPS33A;VPS33B;WIPI2;ATG13;PINK1;ATG16L1;SNX14;NBR1;VPS41;ATG4B;CHMP3;ULK1;VDAC1;PIK3C3;ATP13A2;VIPAS39;TECPR1
negative regulation of intracellular signal transduction (GO:1902532)	49/198	1.96379e-05	0.00121034	0	0	2.0974	22.7317	DGKG;MAPKBP1;DGKD;WWC1;OTUD7A;PIK3CB;NOC2L;HERPUD1;RNF157;FLCN;AKT1;DUSP1;MAGI2;PPP2R5B;MUL1;TSC2;TSC1;CIT;PPM1A;CACTIN;DEPDC5;VGLL4;SHANK2;PHLPP2;MGRN1;SRC;NPRL2;NPRL3;ITPR1;PIK3R2;UBR2;TMEM127;INPP5K;RIOK3;PDE2A;DAB2IP;ATP2B4;NR1D1;MAPK14;PER1;PINK1;PDE10A;PIK3IP1;TNIP1;DLG5;NF1;CCDC22;NOP53;BCL2L2
ephrin receptor signaling pathway (GO:0048013)	26/82	2.08938e-05	0.00127165	0	0	2.95191	31.81	EPHA10;ROCK2;SRC;ARHGEF28;ARPC1A;ITSN1;AP2A1;AP2A2;KALRN;NCSTN;SIPA1L1;FYN;EPHB1;AP2M1;GIT1;ANKS1B;EPHB3;EPHA7;PTPN11;AP2B1;GRIN2B;DNM1;PTK2;TIAM1;EFNA3;NGEF
regulation of cilium assembly (GO:1902017)	22/64	2.17038e-05	0.00130464	0	0	3.32815	35.7378	TBC1D9B;IFT140;LIMK2;TESK1;TBC1D8;ARHGAP35;TCHP;DYNC2LI1;CROCC;SGSM3;TBC1D30;TBC1D13;CDK10;EVI5L;MARK4;TBC1D17;BBS4;TBC1D22B;TBC1D15;TBC1D10B;CDKL1;TBC1D16
negative regulation of organelle assembly (GO:1902116)	15/35	2.25744e-05	0.00134042	0	0	4.75911	50.9162	SMAD4;LRRK2;LIMK2;TESK1;TCHP;SCFD1;KAT2A;PINK1;FEZ1;TBC1D30;FEZ2;CDK10;TRIM37;EVI5L;CDK5RAP2
positive regulation of axonogenesis (GO:0050772)	17/43	2.34142e-05	0.00137354	0	0	4.15057	44.2541	SEMA7A;PLXND1;AMIGO1;LIMK1;TWF2;L1CAM;TIAM2;TIAM1;ZFYVE27;SLITRK1;PLXNA2;PLXNA1;PLXNB2;PLXNB1;MAPT;PLXNA4;PLXNA3
peptidyl-threonine phosphorylation (GO:0018107)	21/60	2.43067e-05	0.00139759	0	0	3.42058	36.3428	MAP2K1;ROCK2;LRRK2;PRKCD;CAMK2A;LMTK2;CDC42BPB;ACVR1B;CDC42BPA;TTBK1;CIT;TBK1;SBK1;AKT1;MAPK1;CDK10;MAP3K10;ULK1;MARK2;MAP3K12;TAF1
neurotransmitter receptor transport to postsynaptic membrane (GO:0098969)	7/9	2.46853e-05	0.00139759	0	0	22.1671	235.177	ARHGAP44;GRIPAP1;STX1B;SCRIB;GRIP2;RAB11A;RAB8A
semaphorin-plexin signaling pathway involved in axon guidance (GO:1902287)	7/9	2.46853e-05	0.00139759	0	0	22.1671	235.177	PLXND1;PLXNA2;PLXNA1;PLXNB2;PLXNB1;PLXNA4;PLXNA3
regulation of proteasomal ubiquitin-dependent protein catabolic process (GO:0032434)	30/102	2.60459e-05	0.00145767	0	0	2.6506	27.9789	VCP;HSP90AB1;LRRK2;KEAP1;RNF19B;PRICKLE1;FBXO22;CCAR2;HERPUD1;BAG6;DNAJB2;UFL1;NUB1;HECTD1;DVL1;ARIH2;TLK2;BBS7;UBQLN4;USP7;ZER1;USP5;CSNK1D;CSNK1E;SIRT2;UCHL5;SMAD7;MAP1A;NOP53;TAF1
protein localization to membrane (GO:0072657)	48/195	2.75436e-05	0.00152398	0	0	2.08201	21.8606	SPTBN4;C2CD5;NLGN2;ROCK2;STXBP1;LRRC4;NRXN2;ZDHHC22;TM9SF4;IKBKB;AP4M1;DPP6;ZFYVE27;DVL1;FLOT1;INPP5K;PIP5K1A;FLOT2;RAB8A;PPIL2;JUP;KCNB1;SEC16A;RDX;RFTN1;MAGI2;AP3D1;TTC7B;MYO5A;SCRIB;ANK3;ANK1;EFR3B;RAB11A;EHD1;GAK;EHD3;CACNB3;DLG3;PACS1;DLG4;RAB15;TSPAN17;PICK1;GAS6;AGRN;RAPGEF6;SHANK3
regulation of cellular catabolic process (GO:0031329)	22/65	2.86068e-05	0.00156501	0	0	3.25056	34.007	USP13;OSBPL7;MTMR3;DAPK1;LRRK2;USP33;DAPK3;WDR41;ITPR1;KEAP1;PIK3R2;MTMR4;HDAC6;RMC1;RPTOR;WDR91;LONP2;PIP4K2B;PIP4K2C;MAPT;DEPDC5;RAB8A
ncRNA processing (GO:0034470)	49/201	2.99742e-05	0.0016216	0	0	2.05564	21.4098	INTS11;TUT7;DDX49;TUT4;INTS10;ADAR;PWP2;WDR43;RRP9;NOB1;DGCR8;MTREX;WDR36;WDR74;IMP4;SENP3;EBNA1BP2;XRN2;ZCCHC8;DDX27;SRRT;NOC4L;NOL6;EXOSC10;EXOSC9;PES1;BMS1;EXOSC8;DROSHA;UTP20;EXOSC2;DCAF13;NOP56;UTP6;NOP14;NOP58;HELQ;INTS1;UTP4;UTP3;INTS3;WDR18;WDR12;TARBP2;BOP1;TBL3;LAS1L;AGO1;NOP53
membrane depolarization (GO:0051899)	14/32	3.19374e-05	0.00170883	0	0	4.93413	51.0767	CHRNB2;KCNH2;CHRNA4;CACNA1B;CACNA1A;CACNA1E;CACNA1H;CACNA1G;CACNA1I;CACNB3;P2RX4;SCN8A;CACNG2;CACNG4
axonal transport (GO:0098930)	15/36	3.3826e-05	0.00179021	0	0	4.53222	46.6559	DYNC1H1;DST;DCTN1;AP3D1;AP3B1;AP3B2;AP3M2;KIF3B;KIF3A;AP3S2;KIF1B;KIF1A;HAP1;MAPT;SYBU
inositol phosphate catabolic process (GO:0071545)	8/12	3.56341e-05	0.00186562	0	0	12.6701	129.77	INPP5A;SYNJ1;INPP1;INPP5J;INPP5K;OCRL;SYNJ2;NUDT3
regulation of AMPA receptor activity (GO:2000311)	12/25	3.80468e-05	0.00197074	0	0	5.85328	59.567	NLGN3;CACNG7;ARC;NLGN2;MINK1;GSG1L;CACNG2;MAPK8IP2;SHANK3;CACNG4;SHISA7;SHANK1
IRE1-mediated unfolded protein response (GO:0036498)	19/53	4.00401e-05	0.00205216	0	0	3.54834	35.9292	TSPYL2;KLHDC3;ACADVL;CUL7;DCTN1;PPP2R5B;CXXC1;ARFGAP1;ADD1;TATDN2;EXTL1;CTDSP2;LMNA;PREB;HDGF;ATP6V0D1;TLN1;EXTL3;SEC31A
mitotic cell cycle phase transition (GO:0044772)	50/209	4.24069e-05	0.00215083	0	0	2.00517	20.1885	CCNH;ACTR1A;CCND3;CDC23;TUBA1A;PPME1;ENSA;CEP250;PIM2;BTRC;PRKACA;CDK5RAP2;HSP90AA1;ANAPC7;CEP131;CSNK1D;CSNK1E;TUBG1;CKAP5;TUBA4A;DNM2;AKAP9;CEP63;BCAT1;PPP1R12B;CHMP7;OPTN;ANAPC1;BRSK1;BRSK2;CTDP1;DCTN1;CUL3;CUL2;CAMK2A;CUL1;ACVR1B;PCNT;EIF4E;CLASP1;DYNC1H1;ODF2;PLK2;TUBB4B;TUBB4A;USP29;UBE2S;CDC16;PPP2R2D;FBXL6
positive regulation of histone ubiquitination (GO:0033184)	5/5	4.74958e-05	0.00238124	0	0	86335	859454	CDK9;RNF20;KDM1A;CTR9;RNF40
endomembrane system organization (GO:0010256)	48/199	4.7928e-05	0.00238124	0	0	2.02639	20.1541	CUL7;ATL1;LRRK2;SYNE1;GOLGA2;RNF112;ARHGAP21;SEC61A1;SYNGR1;SMPD4;VPS51;VPS11;MYO18A;DYM;TRAPPC11;CLASP1;SEC31A;VPS18;BCAS3;SUN2;SUN1;COG7;FBXW8;ATP8B2;COG4;TANGO2;SEC16A;GBF1;VPS33B;OSBPL2;AP3D1;HUWE1;COG1;CSNK1D;DNAJC13;ANK3;LEMD2;TJAP1;DNM1;GAK;SEC23IP;ALS2;DOP1B;PLEKHM2;TMCC1;OBSL1;OPTN;PI4K2A
anterograde axonal transport (GO:0008089)	15/37	4.97313e-05	0.00243497	0	0	4.32596	42.8654	AP3D1;AP3B1;TRAK1;AP3B2;MAPK8IP3;AP3M2;KIF3B;KIF3A;KIF5A;MAP1A;KIF1C;AP3S2;KIF1B;KIF1A;HAP1
maturation of 5.8S rRNA from tricistronic rRNA transcript (SSU-rRNA, 5.8S rRNA, LSU-rRNA) (GO:0000466)	11/22	5.00096e-05	0.00243497	0	0	6.33946	62.7815	NOP14;EXOSC10;EXOSC9;PES1;ERI3;EXOSC8;UTP20;KRI1;WDR12;EXOSC2;FTSJ3
proteasomal protein catabolic process (GO:0010498)	49/205	5.15326e-05	0.00248428	0	0	2.00246	19.7709	CCDC47;ARRB1;PRPF19;PSMD7;MAEA;PSMD2;ENC1;TRIM3;PSMD1;BTRC;AREL1;FBXW5;FBXW7;UBE4B;SIRT2;DDB1;PSMA5;PSMA4;IFI27;KCTD10;RBCK1;BRSK2;PSMD12;VCP;CUL3;NEDD4L;AGAP3;PSMA7;BAG6;RMND5B;ERLEC1;ZNRF1;MTA1;HECTD3;ZSWIM8;PSMF1;DCAF11;FBXL19;HUWE1;KLHL22;WWP2;NR1D1;SPSB3;PSMC5;PSMC6;PSMC3;PSMC4;PSMC1;PSMC2
regulation of proteasomal protein catabolic process (GO:0061136)	19/54	5.39187e-05	0.00257383	0	0	3.44676	33.8749	PRKCG;OSBPL7;HSP90AB1;FBXW7;DAB2IP;PKD1;UCHL5;USP19;UFL1;PINK1;PSMC5;PSMC6;OPHN1;PSMC3;PSMC2;PSMF1;PRKACA;UBQLN4;PSME3IP1
small GTPase mediated signal transduction (GO:0007264)	30/106	5.79782e-05	0.00274074	0	0	2.51051	24.4912	DNMT1;SHC2;ARHGAP1;ABR;RASSF1;TRIM28;ARFIP2;RALGDS;BRAP;RALBP1;KSR1;PLK2;TNK2;KSR2;MAPK14;RUNDC3A;BCR;TIAM2;ARHGAP33;TIAM1;ARHGAP32;MAPK11;RIT1;MRAS;NF1;GRB2;RGL1;RGL2;RAPGEF6;NUCB2
positive regulation of protein localization to nucleus (GO:1900182)	22/68	6.26329e-05	0.00288016	0	0	3.03804	29.4028	CCT3;CCT2;HDAC3;JUP;LIMK2;PRKCD;MEPCE;TESK1;LARP7;PIK3R2;CCT6A;TRIM28;BAG3;ZIC1;TCP1;ORMDL3;TPR;UBR5;AKT1;CCT5;RAN;ZPR1
mitochondrion localization (GO:0051646)	10/19	6.32937e-05	0.00288016	0	0	7.04207	68.0808	ATCAY;MSTO1;LRRK2;MUL1;MFN2;HAP1;TRAK1;TLE6;MARK2;MARK1
regulation of autophagy of mitochondrion (GO:1903146)	10/19	6.32937e-05	0.00288016	0	0	7.04207	68.0808	USP36;PINK1;FBXW7;HTRA2;ATP13A2;VDAC1;FBXO7;HDAC6;SREBF2;CAMKK2
regulation of nervous system process (GO:0031644)	10/19	6.32937e-05	0.00288016	0	0	7.04207	68.0808	SLC8A3;ROCK2;AKAP9;DLGAP1;DLGAP3;NPTXR;DLGAP2;BEGAIN;SLC8A2;DLGAP4
regulation of cellular protein localization (GO:1903827)	17/46	6.48055e-05	0.00292165	0	0	3.72056	35.8815	ABCA2;SETD2;VCP;HSP90AA1;HSP90AB1;KDM1A;PARP1;GBF1;CSNK1E;KCNAB2;PPM1F;DVL1;MAP1A;TRIM46;ATP13A2;MAPT;RAB11FIP5
neurotransmitter transport (GO:0006836)	23/73	6.85699e-05	0.00305942	0	0	2.92244	28.0194	UNC13B;BRSK1;UNC13A;PTPRN2;SYT1;GLS2;STXBP1;STXBP2;CASK;NRXN2;ATP1A2;SYN1;GRM4;HRH3;SYNJ1;SNPH;DNAJC5;DVL1;SLC17A7;APBA1;PPFIA4;TSPOAP1;PPFIA3
maturation of SSU-rRNA from tricistronic rRNA transcript (SSU-rRNA, 5.8S rRNA, LSU-rRNA) (GO:0000462)	13/30	6.91181e-05	0.00305942	0	0	4.8497	46.4586	NOP14;UTP6;UTP4;UTP3;NGDN;KRI1;PWP2;TBL3;BMS1;TSR1;UTP20;NOL10;DCAF13
regulation of macroautophagy (GO:0016241)	31/112	6.99623e-05	0.00306889	0	0	2.43426	23.2899	USP36;LRRK2;GBA;CLEC16A;PRKAG2;SNX32;VPS26B;HDAC6;RPTOR;NRBP2;TBK1;LARP1;ATG101;SESN1;MLST8;AKT1;QSOX1;CAPN1;PRKACA;LZTS1;ATP6V0A1;TSC2;TSC1;ATG13;MTOR;PINK1;ATP6V1B2;EXOC4;ULK1;ATP13A2;ATP6V0D1
regulation of postsynaptic neurotransmitter receptor activity (GO:0098962)	7/10	7.25099e-05	0.00315224	0	0	14.7772	140.853	AKAP9;DLGAP1;DLGAP3;NPTXR;DLGAP2;BEGAIN;DLGAP4
RNA metabolic process (GO:0016070)	35/133	7.71159e-05	0.00332281	0	0	2.27272	21.5231	FTO;RNASEH2C;RNASEH2A;DDX24;DHX9;FASTKD2;PARN;HNRNPU;ADAR;ADARB1;TBRG4;PTBP1;METTL14;POLR2A;POLR2B;DROSHA;MTREX;RBM5;RBM6;RBFOX2;NCBP1;WDR74;LSM1;TFIP11;GTF2F1;SND1;SETX;SUPV3L1;SNRNP40;DDX39B;HNRNPUL1;AGO1;XRN2;SKIV2L;SIDT2
central nervous system neuron axonogenesis (GO:0021955)	8/13	8.1502e-05	0.00345783	0	0	10.1355	95.4244	CHRNB2;SPTBN4;HSP90AA1;HSP90AB1;MYCBP2;EPHB1;ARHGAP35;B4GALT5
regulation of neuron projection development (GO:0010975)	41/165	8.16697e-05	0.00345783	0	0	2.10559	19.8196	CAMK2B;BRSK1;BRSK2;NDRG4;HDAC2;PTPRS;LRRK2;TWF2;CRMP1;KNDC1;ARHGAP35;ADCY6;ARHGAP44;SIPA1L1;DPYSL3;NCS1;AKT1;PTK2B;KIF1A;FBXO7;CAMK2G;MARK2;EPHB3;LZTS3;MARK1;NTNG2;PLK5;KIDINS220;MAGI2;DAB2IP;SRCIN1;TANC2;SETX;GAK;STX1B;ARC;MAG;RTN4RL1;RAPGEF1;PLXNB2;SHANK3
polyol metabolic process (GO:0019751)	17/47	8.86909e-05	0.00372272	0	0	3.59633	33.555	ISYNA1;INPP1;ITPK1;OCRL;NUDT3;INPP4A;PLCB3;INPP5A;PPIP5K1;SYNJ1;INPP5J;PLCG1;PLCH2;IP6K1;PLCD3;PLCD4;IP6K2
positive regulation of ubiquitin-dependent protein catabolic process (GO:2000060)	24/79	9.20947e-05	0.00383256	0	0	2.7725	25.764	VCP;ZER1;USP5;FBXW7;LRRK2;AXIN1;KEAP1;RNF19B;CSNK1D;CSNK1E;PRICKLE1;FBXO22;SIRT2;PTK2;SMAD7;DNAJB2;NUB1;HECTD1;DVL1;ARIH2;BBS7;CCDC22;NOP53;TAF1
cellular response to glucose starvation (GO:0042149)	16/43	9.61939e-05	0.00387235	0	0	3.76014	34.7781	BECN1;BRSK1;BRSK2;SZT2;MTMR3;PIK3R4;PRKAG2;ASNS;FOXO3;ITFG2;NUAK1;MYBBP1A;SESN1;PICK1;PIK3C3;KPTN
signal release from synapse (GO:0099643)	16/43	9.61939e-05	0.00387235	0	0	3.76014	34.7781	BRSK1;PTPRN2;UNC13A;SYT1;STXBP1;STXBP2;NRXN2;CPLX2;SYN1;GRM4;HRH3;SNPH;DNAJC5;DVL1;PIP5K1C;PPFIA3
anaphase-promoting complex-dependent catabolic process (GO:0031145)	25/84	9.62321e-05	0.00387235	0	0	2.69259	24.9031	PSMD12;CUL3;PSMA7;FZR1;CDC23;PSMD7;PSMD2;PSMD1;BUB3;PSMF1;ANAPC7;FBXO31;PSMA5;PSMC5;PSMA4;PSMC6;PSMC3;PSMC4;UBE2S;PSMC1;CDC16;PSMC2;ANAPC4;ANAPC1;ANAPC2
nuclear export (GO:0051168)	25/84	9.62321e-05	0.00387235	0	0	2.69259	24.9031	POM121;RBM8A;EIF4A3;U2AF1;PKD1;U2AF1L4;XPO6;XPO5;TPR;DHX38;EIF4E;RAE1;NUP214;RANBP3;NCBP1;STRADA;STRADB;THOC3;THOC5;SRRM1;LSG1;DDX39B;SRSF4;SLU7;RAN
dendritic spine organization (GO:0097061)	12/27	9.75745e-05	0.00389418	0	0	5.07225	46.8417	MTMR2;ARC;ITGA3;DLG4;CTNND2;PICK1;DIP2A;FYN;EPHB1;SHANK3;EPHB3;SHANK1
SCF-dependent proteasomal ubiquitin-dependent protein catabolic process (GO:0031146)	26/89	9.92283e-05	0.00392799	0	0	2.62285	24.1777	PSMD12;CUL2;CUL1;PSMA7;PSMD7;PSMD2;PSMD1;FBXO6;PSMF1;BTRC;FBXW4;FBXW5;FBXW7;FBXO38;FBXL16;FBXL14;FBXO31;PSMA5;PSMC5;PSMA4;PSMC6;PSMC3;PSMC4;PSMC1;PSMC2;FBXL6
regulation of autophagosome assembly (GO:2000785)	14/35	0.000105194	0.00405073	0	0	4.22852	38.732	LRSAM1;MTMR3;LRRK2;NPRL2;NPRL3;SCFD1;PINK1;FEZ1;ADPRH;FEZ2;RAB3GAP2;PIP4K2B;PIP4K2C;RAB3GAP1
regulation of regulated secretory pathway (GO:1903305)	14/35	0.000105194	0.00405073	0	0	4.22852	38.732	VPS18;SYT2;DOC2A;SYT1;LRRK2;SEPTIN5;SYT13;SYN1;SYT7;RIMS4;PREPL;RIMS3;SYT12;RAB15
regulation of TORC1 signaling (GO:1903432)	14/35	0.000105194	0.00405073	0	0	4.22852	38.732	SZT2;SEH1L;CLEC16A;KLHL22;ITFG2;FLCN;STK11;CASTOR2;SESN1;DGKQ;SIK3;DEPDC5;KPTN;TELO2
protein deubiquitination (GO:0016579)	59/267	0.000105657	0.00405073	0	0	1.80959	16.5674	USP36;WDR48;TRRAP;USP32;USP33;OTUD7A;KEAP1;BABAM2;PSMD7;PSMD2;RUVBL1;PSMD1;UFD1;USP30;ATXN7L3;USP47;USP7;USP5;USP4;ACTL6A;USP2;ACTR8;JOSD1;UCHL5;HCFC1;PSMA5;RNF123;KAT2A;PSMA4;USP13;BECN1;PSMD12;VCP;USP15;SHMT2;USP11;USP12;SPATA2;FOXO4;PSMA7;USP19;PSMF1;MBD5;SMAD4;USP20;USP21;USP22;ADRM1;USP29;SMAD7;PSMC5;PSMC6;PSMC3;TNIP1;PSMC4;PSMC1;PSMC2;TADA3;BAP1
regulation of cell cycle (GO:0051726)	64/296	0.000108317	0.00412026	0	0	1.7607	16.076	INTS13;HSP90AB1;PPP1R13B;HNRNPU;ADARB1;PKD1;PPP1R9B;RNF112;RASSF1;STK11;MAEA;AKT2;RPS6KA2;WDR6;PIM2;PRKACA;JUNB;TMEM8B;MEN1;TSPYL2;MAP2K1;DUSP1;DAPK3;MAGI2;TSC2;TSC1;SND1;SIRT2;RNF40;HCFC1;RNF167;MED25;BIN1;MADD;CDC123;CTBP1;PRCC;HTRA2;FOXO4;TBRG4;BRINP1;PES1;MFN2;APBB1;GAS2L1;RNF20;GADD45B;GBF1;DAB2IP;DHCR24;WDR12;CDK11B;GADD45G;CDK9;BOP1;NR4A1;MYBBP1A;CDK10;TAF6;NF2;INHA;NOP53;BAP1;FBXL6
regulation of translation (GO:0006417)	43/178	0.000111349	0.00420279	0	0	2.02857	18.4658	CYFIP1;DHX9;SHMT2;DDX1;EIF4A3;NAT10;FOXO3;GLE1;CTIF;METTL14;FXR2;LARP1;MTG1;OGFOD1;ENC1;EIF4E;TRAP1;EIF5B;UPF1;IGFBP5;NCBP1;DAPK1;DAPK3;PCIF1;CIRBP;TSC1;CNOT10;UPF3A;LARP4B;EEF2;PUM3;MTOR;ILF3;EIF6;CNOT1;NCL;PLXNB2;CNOT8;EIF3C;EIF4G3;EIF3D;EIF4G1;EIF3B
regulation of GTPase activity (GO:0043087)	45/189	0.000112461	0.0042121	0	0	1.99068	18.101	PLXND1;DOCK9;LRRK2;RASGRF1;RAP1GAP;ARHGAP44;FLCN;SIPA1L1;TBC1D30;PLXNA2;PLXNA1;MMUT;EVI5L;RGS8;SRGAP2;RGS6;PLXNA4;TBC1D15;EPHB3;TBC1D10B;PLXNA3;MAP4K4;BCAS3;RALBP1;RCC2;RDX;DAB2IP;OCRL;PTK2;RGP1;AFDN;ALS2;SGSM3;SGSM2;NF1;RAPGEF1;PLXNB2;RAB3GAP2;PKP4;PLXNB1;AGRN;RAPGEF6;NGEF;RAPGEF3;RAB3GAP1
regulation of organelle organization (GO:0033043)	24/80	0.000114705	0.00426334	0	0	2.72283	24.7046	STX18;PDE2A;RDX;CLEC16A;MUL1;MYO5A;PDE4DIP;RBSN;PTK2;PISD;CAMSAP3;DIAPH1;RHOT2;EHD3;PINK1;AKAP9;CAPN2;VPS11;MAPK1;PREB;ATP13A2;PLXNB1;MAPT;MARK2
cellular response to nutrient levels (GO:0031669)	21/66	0.000119484	0.00432214	0	0	2.96347	26.767	RIPOR1;KCNB1;EHMT2;LRRK2;USP33;CLEC16A;TSC1;WIPI2;WDR45;ZFYVE1;SREBF2;MTOR;RPTOR;FLCN;STK24;VPS41;ULK1;GAS2L1;ATG7;PDK2;EIF4G1
inositol phosphate metabolic process (GO:0043647)	17/48	0.000119975	0.00432214	0	0	3.48012	31.4193	ISYNA1;INPP1;ITPK1;OCRL;NUDT3;INPP4A;PLCB3;INPP5A;PPIP5K1;SYNJ1;INPP5J;PLCG1;PLCH2;IP6K1;PLCD3;PLCD4;IP6K2
purine ribonucleotide biosynthetic process (GO:0009152)	17/48	0.000119975	0.00432214	0	0	3.48012	31.4193	PANK4;SLC35B2;ADSL;NPR2;ADCY3;ADCY2;AMPD2;ADCY1;AK5;ADCY6;PPCDC;COASY;ACAT1;ADCY5;PAPSS1;IMPDH1;IMPDH2
regulation of mitochondrion organization (GO:0010821)	17/48	0.000119975	0.00432214	0	0	3.48012	31.4193	USP36;FBXW7;LRRK2;STAT2;PDE2A;HTRA2;MUL1;HDAC6;SREBF2;PISD;FLCN;RHOT2;PINK1;INF2;ATP13A2;VDAC1;MAPT
cellular amino acid catabolic process (GO:0009063)	26/90	0.000121613	0.00432214	0	0	2.58172	23.2734	GCDH;ECHS1;GLS2;SHMT2;DLST;ABAT;HSD17B10;ACAT1;CBS;DBT;NOS1;CRYM;SLC25A44;ACAD8;BCKDHA;MCCC2;GOT1;MCCC1;GOT2;ACADSB;BCKDK;IVD;OGDH;BLMH;BCAT1;ALDH7A1
regulation of mRNA splicing, via spliceosome (GO:0048024)	26/90	0.000121613	0.00432214	0	0	2.58172	23.2734	KHDRBS3;RBM8A;SFSWAP;CELF3;CELF4;CELF5;HNRNPU;PTBP1;RBM15B;FXR2;PCBP4;METTL16;ZBTB7A;RBM5;RBFOX2;NCBP1;RBFOX3;CIRBP;LARP7;JMJD6;SRPK1;SMU1;THRAP3;NCL;NOVA2;SRSF4
positive regulation of programmed cell death (GO:0043068)	62/286	0.000127282	0.00446545	0	0	1.7661	15.8404	MTCH2;TRIO;LRRK2;RASGRF2;ITSN1;UBE2Z;CCAR2;CASP9;PREX1;FLCN;AIFM1;RPS6KA2;MCF2L;PLEKHN1;CTNNBL1;RBM5;MAP3K5;UNC13B;ARHGEF11;PRMT2;DAPK1;SPHK2;ARHGEF17;PLEKHG5;DAPK3;SCRIB;DNM2;TIAM2;TIAM1;BIN1;KCNMA1;ARHGEF3;ARHGEF4;ARHGEF1;ARHGEF2;ATF6;SOS2;NGEF;HTRA2;FOXO3;KALRN;HDAC6;ABR;NCSTN;BCLAF1;APBB1;MARK4;ATG7;IP6K2;MOAP1;GADD45B;BAD;DAB2IP;HIP1R;PNMA3;SEPTIN4;GADD45G;ERCC3;NF1;MAP3K10;QRICH1;MAP3K11
protein stabilization (GO:0050821)	43/179	0.00012748	0.00446545	0	0	2.01354	18.0565	USP13;USP36;HSP90AB1;CCNH;USP33;MTMR9;WIZ;PHB2;USP19;BAG6;NCLN;BAG3;BAG1;DVL1;FLOT1;FLOT2;PIM2;CCT5;CCT3;CCT2;USP7;HSP90AA1;COG7;FBXW7;SEC16A;PRKCD;USP2;HPS4;HIP1R;MUL1;TSC1;GTPBP4;HCFC1;SMAD7;CCT6A;PINK1;WDR81;PEX6;TCP1;IFT46;NOP53;TELO2;TAF1
neurotransmitter secretion (GO:0007269)	16/44	0.000132121	0.00459496	0	0	3.62564	32.3835	BRSK1;PTPRN2;UNC13A;SYT1;STXBP1;STXBP2;NRXN2;CPLX2;SYN1;GRM4;HRH3;SNPH;DNAJC5;DVL1;PIP5K1C;PPFIA3
cell morphogenesis involved in neuron differentiation (GO:0048667)	23/76	0.000136457	0.00466658	0	0	2.75654	24.5318	BRSK1;SPTBN4;NTNG2;BRSK2;MAP1S;ATL1;MINK1;LMTK2;ANK3;MAPK8IP2;CELSR2;AFG3L2;OPHN1;SLITRK1;ADGRB1;MAP1A;DVL1;TAOK2;S100A6;APBB1;NEFH;DSCAML1;RAB8A
RNA transport (GO:0050658)	23/76	0.000136457	0.00466658	0	0	2.75654	24.5318	NUP214;POM121;NCBP1;RBM8A;EIF4A3;RFTN1;THOC3;U2AF1;THOC5;CKAP5;SRRM1;U2AF1L4;ARC;DDX39B;XPO5;TPR;FLOT1;DHX38;SRSF4;SLU7;EIF4E;RAE1;SIDT2
positive regulation of apoptotic process (GO:0043065)	66/310	0.000137549	0.00466658	0	0	1.7265	15.3513	MTCH2;TRIO;RASGRF2;ITSN1;UBE2Z;CCAR2;CASP9;PREX1;FLCN;AIFM1;RPS6KA2;MCF2L;PLEKHN1;CTNNBL1;RBM5;MAP3K5;UNC13B;ARHGEF11;EPHA7;PRMT2;DAPK1;SPHK2;ARHGEF17;PLEKHG5;DAPK3;SCRIB;SIRT2;DNM2;TIAM2;BACE1;TIAM1;TRAF7;BRMS1;BIN1;KCNMA1;ARHGEF3;ARHGEF4;ARHGEF1;ARHGEF2;ATF6;SOS2;NGEF;HTRA2;FOXO3;KALRN;ABR;NCSTN;BCLAF1;APBB1;ATG7;IP6K2;MOAP1;GADD45B;BAD;DAB2IP;HIP1R;PNMA3;SEPTIN4;GADD45G;MYBBP1A;ERCC3;DLC1;NF1;…
positive regulation of dendrite extension (GO:1903861)	9/17	0.000140986	0.00466658	0	0	7.12789	63.202	CPNE9;RNF157;SYT2;UNC13A;CPNE5;SYT1;CPNE6;NEDD4L;RASAL1
regulation of Golgi organization (GO:1903358)	9/17	0.000140986	0.00466658	0	0	7.12789	63.202	CAMSAP3;MAP2K1;EHD3;STX18;AKAP9;MYO5A;PDE4DIP;MAPK1;RBSN
negative regulation of lipid kinase activity (GO:0090219)	6/8	0.00014155	0.00466658	0	0	18.9934	168.336	RUBCN;PIK3IP1;DAB2IP;PIP4K2B;PIP4K2C;WASHC1
TORC1 signaling (GO:0038202)	6/8	0.00014155	0.00466658	0	0	18.9934	168.336	RPTOR;LARP1;NPRL3;CLEC16A;MLST8;MTOR
positive regulation of cellular amide metabolic process (GO:0034250)	24/81	0.000142123	0.00466658	0	0	2.6749	23.6965	ABCA2;SPHK2;ROCK2;EIF4A3;PRKCD;PCIF1;CIRBP;NAT10;UPF3A;LARP4B;PLA2G6;EEF2;MTOR;SMPD3;SMPD2;METTL14;FXR2;LRRTM3;EIF6;PLXNB2;EIF3C;EIF3D;ABCG1;NSMAF
autophagy of mitochondrion (GO:0000422)	15/40	0.000142805	0.00466658	0	0	3.80618	33.7	BECN1;ATG9A;AMBRA1;WIPI2;WDR45;PHB2;ATG13;PINK1;ATG2A;ULK1;USP30;ATG7;FBXO7;MARK2;ATG2B
regulation of Ras protein signal transduction (GO:0046578)	25/86	0.000146051	0.0047408	0	0	2.604	22.9974	DENND1A;ARHGEF28;MAPKAP1;RASGRF1;STK19;ARHGAP44;FLCN;SYNGAP1;OPHN1;MFN2;CADM4;DENND4B;RDX;DAB2IP;MYO9B;ARFGAP1;BCR;DLC1;SGSM3;MADD;RAPGEF1;GRB2;ARHGEF2;RAF1;LZTR1
dendrite morphogenesis (GO:0048813)	14/36	0.000150609	0.00485641	0	0	4.03608	35.5208	CTNND2;MINK1;MAPK8IP2;CELSR2;ARC;DLG4;DVL1;TAOK2;DIP2A;PHACTR1;EPHB1;SHANK3;EPHB3;SHANK1
peptidyl-threonine modification (GO:0018210)	21/67	0.000151852	0.00486426	0	0	2.89888	25.4887	MAP2K1;GALNT16;ROCK2;LRRK2;PRKCD;LMTK2;CDC42BPB;ACVR1B;CDC42BPA;TTBK1;CIT;TBK1;SBK1;AKT1;MAPK1;CDK10;MAP3K10;ULK1;MARK2;MAP3K12;TAF1
regulation of dendritic spine morphogenesis (GO:0061001)	13/32	0.000153645	0.00488951	0	0	4.3387	38.0976	CAMK2B;LRRK2;LRP8;SRCIN1;TANC2;ARHGAP44;ARC;CUX2;SIPA1L1;KIF1A;SHANK3;NGEF;LZTS3
ribosome biogenesis (GO:0042254)	45/192	0.000165663	0.00523775	0	0	1.94971	16.9733	DDX49;DDX27;PAK1IP1;NOC4L;NOC2L;PWP2;WDR43;RRP9;NOL6;EXOSC10;NOB1;BMS1;EXOSC9;PES1;EXOSC8;MTREX;UTP20;EXOSC2;DCAF13;METTL17;NOP56;NOM1;NOP14;WDR36;NOP58;UTP6;HELQ;UTP4;UTP3;WDR18;WDR74;LTO1;IMP4;TSC1;WDR12;SENP3;BOP1;EBNA1BP2;TBL3;LSG1;EIF6;LAS1L;XRN2;NOP53;RAN
positive regulation of cell projection organization (GO:0031346)	31/117	0.000168581	0.00529561	0	0	2.29206	19.9137	CAMK2B;CUL7;NDRG4;PLXND1;AMIGO1;TWF2;ARHGAP35;CUX2;CUX1;SLITRK1;DPYSL3;DVL1;PLXNA2;PLXNA1;PTK2B;MARK2;PLXNA4;PLXNA3;PLK5;FBXW8;KIDINS220;MAGI2;DAB2IP;TIAM2;SETX;TIAM1;DLG4;RAPGEF1;PLXNB2;PLXNB1;OBSL1
inositol phosphate dephosphorylation (GO:0046855)	7/11	0.000175768	0.00538248	0	0	11.0823	95.8211	INPP5A;SYNJ1;INPP1;INPP5J;INPP5K;OCRL;SYNJ2
phosphorylated carbohydrate dephosphorylation (GO:0046838)	7/11	0.000175768	0.00538248	0	0	11.0823	95.8211	INPP5A;SYNJ1;INPP1;INPP5J;INPP5K;OCRL;SYNJ2
positive regulation of protein localization to Cajal body (GO:1904871)	7/11	0.000175768	0.00538248	0	0	11.0823	95.8211	CCT3;CCT6A;CCT2;MEPCE;TCP1;LARP7;CCT5
regulation of protein localization to Cajal body (GO:1904869)	7/11	0.000175768	0.00538248	0	0	11.0823	95.8211	CCT3;CCT6A;CCT2;MEPCE;TCP1;LARP7;CCT5
cytoplasmic microtubule organization (GO:0031122)	18/54	0.00018605	0.00566175	0	0	3.1733	27.257	DYNC1H1;NUMA1;DST;DCTN1;TUBGCP2;LIMK2;WDR73;CAMSAP1;RAB11A;CAMSAP3;CLIP2;CLIP1;KATNAL1;TUBGCP6;MAPT;FSD1;KPNB1;CLASP1
regulation of cellular component organization (GO:0051128)	35/139	0.000198518	0.00600363	0	0	2.14085	18.2499	OGFR;SETD5;RAB5B;RAB5C;ROCK2;LTBP4;HNRNPU;RPTOR;STK11;NCLN;OPHN1;PACSIN3;MARK4;ARHGEF11;RAB4A;HSP90AA1;EGLN2;DAB2IP;HIP1R;TSC2;PTPN11;SSRP1;CDK11B;ARFGAP1;MTOR;HCFC1;RUFY1;CAMSAP3;PINK1;SNX17;RUFY2;TAOK2;RAPGEF1;SGK1;BAP1
brain development (GO:0007420)	37/150	0.000207595	0.00623937	0	0	2.08338	17.6669	NDRG4;TUBGCP2;CHD8;AMIGO1;MAST1;AATK;SMG9;BAG6;VPS51;ZIC1;CIC;BBS4;CDK5RAP2;BPTF;BBS2;ARNT2;EPHA7;SLC6A17;MAP1S;UTP3;PBX2;PTPN11;SYNJ2;MEIS3;EML1;GRIN2B;POU6F1;SYNJ1;PITPNM1;NF1;PLXNB2;HAP1;DSCAML1;SHANK3;ADGRL2;RAB3GAP1;ADGRL3
regulation of histone acetylation (GO:0035065)	13/33	0.000221979	0.00663076	0	0	4.12153	34.6741	HDAC5;SETD5;PAXIP1;CTBP1;ARRB1;NOC2L;FLCN;TADA2A;RUVBL2;NOS1;BRD7;RAPGEF3;GLYR1
regulation of synaptic transmission, glutamatergic (GO:0051966)	16/46	0.000240224	0.00705437	0	0	3.38354	28.1982	NLGN3;NLGN2;UNC13A;SYT1;LRRK2;GRIK3;ATP1A2;MAPK8IP2;DGKZ;CACNG7;GRM4;OPHN1;PTK2B;CACNG2;SHANK3;CACNG4
DNA-templated transcription, elongation (GO:0006354)	21/69	0.000240506	0.00705437	0	0	2.77777	23.1465	SETD2;CTDP1;ELOF1;NCBP1;CCNH;CTR9;ADRM1;ELP2;MLLT1;WDR61;SSRP1;GTF2F1;GTF2H3;CDK9;POLR2A;ERCC3;POLR2B;ERCC2;TCEA2;PAF1;NELFCD
RNA 3'-end processing (GO:0031123)	21/69	0.000240506	0.00705437	0	0	2.77777	23.1465	CPSF7;TUT7;NCBP1;RBM8A;CPSF1;TUT4;CPSF3;EIF4A3;CPSF2;THOC3;U2AF1;TENT4A;THOC5;SRRM1;U2AF1L4;SUPV3L1;DDX39B;CSTF1;DHX38;SRSF4;SLU7
rRNA processing (GO:0006364)	41/173	0.000245816	0.00705579	0	0	1.97706	16.4312	DDX49;DDX27;NOP2;NAT10;NOC4L;PWP2;WDR43;RRP9;NOL6;SART1;EXOSC10;NOB1;BMS1;EXOSC9;PES1;EXOSC8;MTREX;UTP20;EXOSC2;DCAF13;NOP56;NOP14;WDR36;NOP58;UTP6;HELQ;UTP4;RIOK3;UTP3;WDR18;WDR74;IMP4;WDR12;SENP3;BOP1;EBNA1BP2;TBL3;EIF6;LAS1L;XRN2;NOP53
positive regulation of excitatory postsynaptic potential (GO:2000463)	9/18	0.0002478	0.00705579	0	0	6.33554	52.6032	NLGN3;STX1B;NLGN2;CUX2;DLG4;PTK2B;PRKCZ;SHANK3;SHANK1
regulation of dendrite extension (GO:1903859)	9/18	0.0002478	0.00705579	0	0	6.33554	52.6032	CPNE9;RNF157;SYT2;UNC13A;CPNE5;SYT1;CPNE6;NEDD4L;RASAL1
regulation of early endosome to late endosome transport (GO:2000641)	9/18	0.0002478	0.00705579	0	0	6.33554	52.6032	MAP2K1;MTMR2;SRC;RDX;VPS11;CHMP3;MAPK1;DNAJC13;PTPN23
regulation of telomerase RNA localization to Cajal body (GO:1904872)	9/18	0.0002478	0.00705579	0	0	6.33554	52.6032	CCT3;CCT6A;CCT2;EXOSC10;RUVBL2;RUVBL1;TCP1;PARN;CCT5
neurotransmitter receptor transport, endosome to postsynaptic membrane (GO:0098887)	5/6	0.000252578	0.00715001	0	0	31.6459	262.148	ARHGAP44;GRIPAP1;SCRIB;GRIP2;RAB11A
regulation of cation channel activity (GO:2001257)	25/89	0.000263815	0.00742494	0	0	2.48151	20.4483	CAMK2B;GRIA1;NLGN2;CAMK2A;JPH4;CACNG7;JPH3;GSG1L;PTK2B;CAPN1;NOS1;PRKACA;CACNG2;CACNG4;DAPK1;MINK1;ANK3;MAPK8IP2;GRIN2B;SHISA7;CACNB3;DLG3;DLG4;FGF11;SHANK1
protein localization to plasma membrane (GO:0072659)	34/136	0.000280906	0.00786053	0	0	2.11992	17.3356	SPTBN4;C2CD5;ROCK2;STXBP1;ZDHHC22;IKBKB;DPP6;ZFYVE27;FLOT1;INPP5K;PIP5K1A;FLOT2;RAB8A;PPIL2;JUP;KCNB1;SEC16A;RDX;TTC7B;MYO5A;ANK3;ANK1;EFR3B;RAB11A;EHD1;GAK;AFDN;CACNB3;EHD3;PACS1;RAB15;TSPAN17;GAS6;RAPGEF6
chemical synaptic transmission (GO:0007268)	64/306	0.000289255	0.0080479	0	0	1.68695	13.7456	CHRM3;CHRM1;DOC2A;GRIK5;CHRM4;CPNE6;KCNC4;GRIK3;GRM4;RPS6KA2;KIF5A;DLGAP1;KIF1B;BSN;PRKACA;DLGAP2;PPFIA3;UNC13B;CHRNB2;UNC13A;GRID1;MINK1;SYN1;CACNB3;PRKAR1B;SNPH;DNAJC5;AKAP9;KCNQ2;EXOC4;HAP1;GRIA1;NLGN3;BRSK1;NLGN2;CHRNA4;STXBP1;STXBP2;CACNA1B;CACNA1A;NRXN2;CACNA1E;CAMKK1;CAMKK2;HRH3;DVL1;MAPK1;SLC17A7;ASIC2;GABRD;TSPOAP1;GABBR2;PTPRN2;SLC12A5;SYT1;GRIN2B;DLG4;CAMK4;RIMBP2;APBA1;APBA2;KCNK3;SCN…
negative regulation of TOR signaling (GO:0032007)	14/38	0.000293786	0.00811466	0	0	3.69931	30.0852	SZT2;NPRL2;NPRL3;TSC2;UBR2;TSC1;ITFG2;FLCN;STK11;TMEM127;CASTOR2;SESN1;DEPDC5;KPTN
cell cycle G2/M phase transition (GO:0044839)	33/131	0.000294988	0.00811466	0	0	2.14126	17.4054	BRSK1;BRSK2;CCNH;DCTN1;AKAP8L;CUL1;ACTR1A;TUBA1A;PPME1;ENSA;CEP250;BTRC;PRKACA;PCNT;CLASP1;CDK5RAP2;DYNC1H1;HSP90AA1;ODF2;CEP131;CSNK1D;CSNK1E;TUBG1;TUBB4B;CKAP5;TUBB4A;TUBA4A;DNM2;AKAP9;CEP63;PPP1R12B;OPTN;FBXL6
COPII-coated vesicle budding (GO:0090114)	21/70	0.000299862	0.00815659	0	0	2.72092	22.0726	NSF;GRIA1;SEC13;SEC24B;CUL3;SEC16A;TRAPPC10;CSNK1D;KLHL12;TRAPPC9;GOLGA2;TRAPPC6A;SCFD1;SEC23IP;PPP6R1;PPP6R3;SCAP;PREB;SEC23B;SEC24C;SEC31A
fatty acid catabolic process (GO:0009062)	21/70	0.000299862	0.00815659	0	0	2.72092	22.0726	ACADVL;FAAH;ACOT8;MECR;ECHS1;ECI2;HSD17B4;HSD17B10;MCAT;ACAT2;ACAT1;ALDH3A2;HADHB;HADHA;PCCA;ACOX1;ILVBL;PCCB;ACADM;MMUT;LPIN2
protein localization to organelle (GO:0033365)	35/142	0.000308338	0.00834056	0	0	2.08046	16.8191	MTCH2;RIPOR1;DHX9;DDX1;CCDC47;LRRK2;BICD2;DVL1;LMNA;MICALL1;CEP250;BBS9;ZBTB7A;BBS4;GET4;BBS2;TUB;COG7;IFT140;GBF1;RPA1;IFT122;CSNK1D;WDR35;RAB11A;ALDH3A2;EHD1;GAK;CROCC;RAB35;TSPAN17;PAF1;SCG3;OBSL1;OPTN
response to amino acid starvation (GO:1990928)	22/75	0.000310054	0.00834061	0	0	2.63572	21.2934	SEC13;SZT2;SEH1L;WDR59;NPRL2;NPRL3;TCIRG1;ITFG2;MTOR;RPTOR;FLCN;LARP1;CASTOR2;SESN1;MLST8;ATP6V1B2;MAPK1;ATP6V0D1;DEPDC5;KPTN;GCN1;MAP3K5
ciliary basal body-plasma membrane docking (GO:0097711)	26/95	0.000315522	0.00834804	0	0	2.39394	19.2983	C2CD3;DCTN1;FBF1;ACTR1A;TUBA1A;NPHP1;CEP250;PRKACA;MARK4;PCNT;CLASP1;CDK5RAP2;DYNC1H1;HSP90AA1;ODF2;CEP131;CSNK1D;CSNK1E;TUBG1;TUBB4B;CKAP5;TUBB4A;TUBA4A;RAB11A;AKAP9;CEP63
fatty acid beta-oxidation using acyl-CoA oxidase (GO:0033540)	8/15	0.000315592	0.00834804	0	0	7.23879	58.3524	ACOT8;AMACR;ACOX1;ECI2;HSD17B4;ACOX3;DECR2;CRAT
regulation of synapse assembly (GO:0051963)	16/47	0.000318435	0.00834804	0	0	3.2742	26.3642	NLGN3;CHRNB2;SETD5;NLGN2;CLSTN2;LHFPL4;LRFN5;CUX2;LRFN4;SLITRK1;DLG5;SLIT1;EPHB1;EPHB3;LRRC4B;EIF4G1
positive regulation of autophagy (GO:0010508)	25/90	0.000318508	0.00834804	0	0	2.44319	19.6722	LRRK2;NPRL2;PIK3CB;FOXO3;PHB2;CAMKK2;TRIM8;FLCN;UFL1;STK11;TBK1;LARP1;SESN1;ORMDL3;PIM2;TRIM27;FBXO7;DAPK1;BAD;PLK2;TSC2;PINK1;ULK1;ATF6;OPTN
Wnt signaling pathway, planar cell polarity pathway (GO:0060071)	24/85	0.000318902	0.00834804	0	0	2.49892	20.1179	PSMD12;MAGI2;PRICKLE2;AP2A1;PRICKLE1;AP2B1;AP2A2;CELSR2;PSMA7;PSMA5;TIAM1;PSMC5;PSMD7;PSMA4;PSMC6;PSMC3;PSMC4;PSMD2;PSMC1;DVL1;PSMC2;PSMD1;PSMF1;AP2M1
TOR signaling (GO:0031929)	11/26	0.000323779	0.00843038	0	0	4.64786	37.3476	RPTOR;FLCN;PINK1;LARP1;MAPKAP1;NPRL3;RPS6KB2;MLST8;AKT1;EIF4EBP2;MTOR
neuron development (GO:0048666)	35/143	0.000355466	0.0092062	0	0	2.06108	16.3692	TENM2;ATP8A2;TENM4;MYT1L;SRF;RASGRF1;GBA;BICDL1;PTPRM;STMN4;FRY;GBA2;HS6ST1;CAMSAP1;PPP1R9B;SAMD14;ATCAY;ZFYVE27;OPHN1;MICALL1;UNC5A;ACTL6B;PRMT1;PBX2;L1CAM;RAB11A;EHD1;GPRIN1;RAB35;ULK1;MAPT;ATXN10;FRYL;CDK16;B4GALT5
regulation of cell cycle process (GO:0010564)	28/106	0.000359412	0.00925913	0	0	2.28111	18.0916	CUL9;BECN1;CUL7;AHCTF1;SETD2;NUMA1;PIK3R4;TTL;USP19;FLCN;KIF13A;CEP250;FSD1;MARK4;RAB11FIP3;RAB11FIP4;BBS4;GIT1;PRMT5;DYNC1H1;PLK5;PLK2;DAPK3;SND1;RAB11A;PIK3C3;OBSL1;MAD1L1
plasma membrane bounded cell projection morphogenesis (GO:0120039)	17/52	0.000361723	0.00926963	0	0	3.08167	24.4211	CNTNAP1;TRIO;NYAP1;MAP1S;LRRK2;MINK1;DAB2IP;MYO16;DNM2;ALS2;TAOK3;TAOK2;PLXNB1;SGK1;SRGAP2;GAS7;MAP4K4
histone acetylation (GO:0016573)	21/71	0.000371653	0.00933535	0	0	2.66635	21.0576	NAA60;BRD1;ACTL6B;TRRAP;BRPF3;ACTL6A;JADE1;CHD5;JADE2;PER1;KAT2A;TADA2A;KAT6B;RUVBL2;RUVBL1;TADA3;EP400;EPC1;TAF6;APBB1;BRD8
mitochondrion distribution (GO:0048311)	7/12	0.000371957	0.00933535	0	0	8.8653	70.0069	ATCAY;CLUH;MSTO1;LRRK2;HAP1;MAPT;TRAK1
phosphate ion transmembrane transport (GO:0035435)	7/12	0.000371957	0.00933535	0	0	8.8653	70.0069	SLC25A3;SLC20A2;SLC20A1;SLC25A10;SLC37A4;SLC25A11;SLC25A14
regulation of alcohol biosynthetic process (GO:1902930)	7/12	0.000371957	0.00933535	0	0	8.8653	70.0069	ABCA2;MBTPS1;DGKQ;CLCN2;KPNB1;RAN;SREBF2
galactose metabolic process (GO:0006012)	6/9	0.00037528	0.00937046	0	0	12.6615	99.8721	SLC35A2;GALE;GALT;CHST1;GALK2;GALK1
post-translational protein modification (GO:0043687)	70/345	0.000390407	0.00969843	0	0	1.6242	12.7472	DCAF8;KEAP1;DCAF5;FBXO21;DCAF4;FBXO22;DCAF7;DCAF6;NUB1;PSMD7;PSMD2;PSMD1;FBXO6;QSOX1;BTRC;FBXO7;RAB8A;MEN1;FBXW4;FBXW5;FBXW8;IGFBP5;FBXW7;ANO8;FN3KRP;LMO7;FBXO10;RABGGTA;SUMF2;DDB1;PSMA5;PSMA4;MXRA8;FAM20C;SCG3;GAS6;OBSL1;CUL9;CUL7;PSMD12;CUL3;CUL2;CUL1;PSMA7;FBXO41;RBBP5;PSMF1;DCAF11;DCAF13;WDTC1;FN3K;MBTPS1;ICMT;FBXL19;TMEM132A;KLHL22;FBXL16;FBXL14;RAB11A;KTN1;FBXO31;SPSB3;PSMC5;PSMC6;PSMC3;PSM…
Table S6. Functional enrichment for SST network modules. Significantly enriched (FDR ≤ 0.01) GO terms and KEGG pathways for genes in modules 1-6 of SST co-expression network.

## Sheet: Module_1_CC
Term	Overlap	P.value	Adjusted.P.value	Old.P.value	Old.Adjusted.P.value	Odds.Ratio	Combined.Score	Genes
neuron projection (GO:0043005)	145/556	2.48802e-15	1.06239e-12	0	0	2.29782	77.2695	CYFIP1;CHRM3;CHRM1;CHRM4;CPNE6;STMN4;KNDC1;SLC8A2;RPH3A;ARHGAP44;SAMD14;ZFYVE27;ATCAY;TUBB3;CAPN2;BSN;RGS8;VSTM5;EPHB1;FBXO7;EPHB3;PRKCG;CHRNB2;EPHA7;UNC13A;DSCAM;MAP1S;MAGI2;MUL1;ANK3;CPT1C;SRCIN1;ANK1;MAPK8IP3;RNF40;BIN1;FEZ1;SCN8A;FEZ2;MAP1A;ADGRB1;PI4K2A;GRIA1;SPTBN4;MTMR2;ADCYAP1R1;EPHA10;CHRNA4;CACNA1H;CACNA1G;CACNA1I;BRINP2;FXR2;INPP5A;BRINP1;HRH3;KIF3B;DVL1;INPP5K;MARK4;MARK2;MARK1;BBS2;S…
intracellular membrane-bounded organelle (GO:0043231)	877/5192	6.97064e-15	1.48823e-12	0	0	1.41833	46.2334	ZFYVE9;EHMT2;ITSN1;TESK1;NOC2L;ALKBH3;TBK1;PSMD7;ZFYVE27;AKT2;PSMD2;AKT1;PSMD1;PRKACA;STARD3;SAP30BP;RBFOX2;RBFOX3;HDHD3;SND1;RUFY1;DDX39B;EWSR1;ATF6;OPTN;RABL6;EXD2;MTMR2;SHMT2;FLII;MEPCE;AGAP2;AGAP1;AGAP3;ABCB9;AAAS;HSPH1;PIP5K1A;LTA4H;ZBTB7A;CTC1;ABCA2;JUP;ABCA3;NR2F1;PBX2;LARP7;CS;SETX;EIF6;AGO1;FAT1;DZIP1;PSME3IP1;PRKAG2;MED16;ECSIT;MED17;OSBPL10;MED12;TUBA1C;MED14;TUBA1A;JAK1;UPF1;DFFA;ACTL…
microtubule cytoskeleton (GO:0015630)	96/331	1.72439e-13	2.45438e-11	0	0	2.63851	77.5425	NUMA1;MAST2;KIF17;CCAR2;TUBA1C;RASSF1;ACTR1A;TUBA1B;ACTR1B;TUBA1A;MAEA;RUSC1;TUBB3;KIF13A;KIF5A;DBT;AKT1;KIF1C;KIF21A;KIF1B;KIF1A;SYBU;CDK5RAP2;APC2;CCT3;CCT2;NUDC;ANAPC7;DST;MAP1S;CEP131;CSNK1D;TUBG2;KCNAB2;TUBG1;EML1;CKAP5;SIRT2;TUBA4A;DNM1;DNM2;NISCH;TUBB2B;CLIP1;TUBB2A;KATNAL1;KIFC2;INCENP;MAP7D1;MAP1A;TCP1;ARHGEF2;MAPT;MAD1L1;CTDP1;SHMT2;DCTN1;PIK3R4;KATNB1;JAKMIP1;CAMSAP1;HDAC6;JAKMIP3;NUAK…
cytoskeleton (GO:0005856)	141/600	2.93553e-11	3.13368e-09	0	0	1.99199	48.3089	FHOD3;SAMD14;RASSF1;MAEA;OPHN1;RUSC1;AKT1;SYNPO;CDK5RAP2;SAP30BP;ANAPC7;DAPK1;CEP131;ALG2;CASK;ANK3;EML1;SRCIN1;ANK1;TUBA4A;NISCH;CLIP1;FRMD5;ARC;PREPL;KATNAL1;BIN1;DGKQ;MAP7D1;AKAP9;FSCN1;PKP4;TLN2;EXD2;SHMT2;DHX9;FLII;PIK3R4;HTRA2;KALRN;ACACA;CORO1C;RHOBTB2;ARHGAP21;NUAK1;NDOR1;KIF3B;EPB41L1;KIF3A;SNTG1;MARK4;MARK1;JUP;AUTS2;PCIF1;MYO5A;KLHL22;CORO2B;SMARCA2;PTK2;CLK3;ARHGAP32;DLG4;MYO5B;NF2;CD…
nucleus (GO:0005634)	746/4484	6.40785e-11	5.18243e-09	0	0	1.35884	31.8931	MYT1L;TRRAP;EHMT2;TESK1;HNRNPU;DCAF8;ADARB1;SMC6;ENO1;NOC2L;PHB2;DCAF7;DCAF6;ALKBH3;DCAF1;RNF112;PSMD7;ZMIZ1;AKT2;ZMIZ2;PSMD2;AKT1;PSMD1;PIP4K2B;PRKACA;IER5;TSPYL2;SAP30BP;RBFOX2;RBFOX3;MAP1S;DAPK1;PRKCD;DAPK3;WDR74;GTPBP4;SND1;HCFC1;WDR77;DDX39B;EWSR1;BIN1;TYRO3;ATF6;OPTN;RABL6;EXD2;MTMR2;CTBP2;SRCAP;SHMT2;CTBP1;FLII;MEPCE;AGAP2;AGAP1;WDR61;AGAP3;AAAS;LDHA;HSPH1;PIP5K1A;LTA4H;ZBTB7A;CTC1;CDK18;P…
postsynaptic density (GO:0014069)	49/138	7.28211e-11	5.18243e-09	0	0	3.52368	82.2533	DAGLA;CTNND2;SLC8A2;PPP1R9B;ARHGAP44;RNF112;SAMD14;SIPA1L1;NOS1;SH2D5;LZTS3;NSF;MAGI2;TSC2;INSYN1;SCRIB;MAPK8IP2;SRCIN1;SHISA7;DNM1;DNM2;INPP4A;ADGRB1;PICK1;SHANK3;SHANK2;SHANK1;GRIA1;MTMR2;ADD1;ADD2;CACNG7;FXR2;PTK2B;FYN;SRGAP2;CACNG2;CACNG4;MPP2;DTNB;IQSEC3;HIP1R;ATP2B2;GRIN2B;SLC8A3;ARHGAP32;DLG4;DLG5;ADGRL1
dendrite (GO:0030425)	77/270	1.03498e-10	6.3134e-09	0	0	2.56472	58.9668	CHRM3;TENM2;CHRM1;DAGLA;KCNC1;KCNC3;CHRM4;LRRK2;CPNE6;KCNC4;GRIK3;KNDC1;SLC8A2;PPP1R9B;ARHGAP44;SAMD14;ZFYVE27;ATCAY;TUBB3;CAPN2;KIF1C;KIF1B;KIF1A;BSN;RGS8;VSTM5;PRKCG;DSCAM;MAP1S;ACAD9;MAGI2;ANK3;CPT1C;MAPK8IP3;SRCIN1;ALS2;BIN1;ADGRB1;MAP1A;HAP1;MAPT;PI4K2A;SHANK1;GRIA1;MTMR2;STAU1;CHRNA4;AMIGO1;KCNA2;ADCY2;TRAK1;HDAC6;STRN4;BRINP2;FXR2;INPP5A;BRINP1;HRH3;KIF3B;PTK2B;FYN;MARK4;MARK2;MARK1;MPP2;M…
mitochondrial matrix (GO:0005759)	91/348	3.49809e-10	1.8671e-08	0	0	2.27971	49.6376	GFM1;ACADVL;ALAS1;GFM2;LRRK2;ABAT;OGDHL;MRPL37;YARS2;CCAR2;ALDH2;MTG1;DBT;FDXR;LONP1;IDH3B;PDK3;TK2;ME3;MLYCD;MMUT;ACADM;DLAT;MRPL9;PDK2;METTL17;MCCC2;ACAD8;BCKDHA;MECR;GPT2;PUS1;ELAC2;MCCC1;SIRT5;DARS2;MRPL48;POLRMT;COASY;SUPV3L1;OXA1L;BDH1;PCCA;IVD;PCCB;TFAM;NDUFS2;SUCLG1;NDUFS1;NAT8L;ALDH7A1;GCDH;ECHS1;ACSS2;POLDIP2;SHMT2;GLS2;ETFDH;DLST;LIAS;FOXO3;HSD17B10;ACAT1;TBRG4;DGUOK;PITRM1;PDSS2;IARS2…
microtubule (GO:0005874)	57/182	5.95143e-10	2.82362e-08	0	0	2.92106	62.0498	NUMA1;KIF17;TUBA1C;TUBA1B;TUBA1A;TUBB3;KIF5A;KIF13A;KIF1C;KIF21A;KIF1B;KIF1A;SYBU;CDK5RAP2;CCT3;CCT2;MAP1S;CSNK1D;KCNAB2;TUBG2;TUBG1;TUBA4A;SIRT2;DNM2;CLIP1;TUBB2B;TUBB2A;KATNAL1;KIFC2;MAP1A;TCP1;ARHGEF2;MAPT;DCTN1;KATNB1;TTL;CAMSAP1;HDAC6;MTA1;KIF3B;DPP9;KIF3A;KIF3C;FSD1;CCT5;CLASP1;DYNC1H1;RMDN3;SEPTIN9;TUBB4B;TUBB4A;LRPPRC;CCT6A;SYNJ1;TBCE;MAP3K11;TUBA8
asymmetric synapse (GO:0032279)	45/133	2.52056e-09	1.07628e-07	0	0	3.26812	64.7049	GRIA1;NLGN3;MTMR2;CTNND2;ADD1;SLC8A2;PPP1R9B;ADD2;ARHGAP44;RNF112;SAMD14;FXR2;SIPA1L1;PTK2B;FYN;NOS1;SRGAP2;SH2D5;LZTS3;NSF;MPP2;DTNB;MAGI2;IQSEC3;HIP1R;TSC2;INSYN1;SCRIB;MAPK8IP2;SRCIN1;GRIN2B;SHISA7;DNM1;DNM2;INPP4A;SLC8A3;ARHGAP32;DLG4;DLG5;ADGRB1;PICK1;ADGRL1;SHANK3;SHANK2;SHANK1
cullin-RING ubiquitin ligase complex (GO:0031461)	49/157	1.05926e-08	4.08148e-07	0	0	2.90056	53.2633	FBH1;FBXO25;DCAF8;KEAP1;DCAF5;DCAF4;DCAF7;DCAF6;DCAF1;CDC23;ENC1;FBXO6;BTRC;FBXO7;FBXW4;USP47;FBXW5;ZER1;ANAPC7;FBXW8;FBXW7;PLRG1;DDB1;KCTD10;ANAPC4;ANAPC1;ANAPC2;CUL9;CUL7;CUL3;CUL2;CUL1;KLHL12;ZSWIM8;DCAF11;DCAF13;WDTC1;FBXO38;FBXL19;KLHL22;FBXL16;FBXL14;FBXO31;SPSB3;UBE2S;CDC16;KLHL8;LZTR1;FBXL6
intracellular non-membrane-bounded organelle (GO:0043232)	225/1158	1.22529e-08	4.08148e-07	0	0	1.5706	28.6124	MAPKBP1;EIF4A3;THUMPD3;ADARB1;NOC2L;SMC3;ZFYVE1;CCAR2;RRP9;GLE1;GOLGA3;NUB1;PDK3;TRIM27;IER5;CDK5RAP2;TSPYL2;COG7;MAP1S;NGDN;WDR74;RECQL;ACSL5;CSNK1D;IMP4;HDHD3;ANK1;GTPBP4;JMJD6;KATNAL1;EWSR1;BIN1;GRWD1;AKAP9;XRN2;DHX9;CYB5R3;EPB41L1;XRCC6;JUP;IQSEC1;UPF3A;PA2G4;PTK2;WAPL;PUM3;SMARCA4;EHD1;ABTB1;TBL3;EIF6;GRB2;NOL10;ANP32B;TOP2B;SETD2;DOC2A;TUT4;PAK1IP1;NAT10;KRI1;WDR43;SMG6;AKAP11;XPO6;PLEKHN1;…
polymeric cytoskeletal fiber (GO:0099513)	69/256	1.24261e-08	4.08148e-07	0	0	2.36571	43.0641	SYNM;KIF17;TUBA1C;TUBA1B;TUBA1A;TUBB3;KIF13A;KIF5A;TLK2;KIF1C;KIF21A;KIF1B;KIF1A;SYBU;CDK5RAP2;APC2;CCT3;CCT2;DST;MAP1S;TSC1;TUBG2;KCNAB2;TUBG1;SIRT2;TUBA4A;DNM2;TUBB2B;CLIP1;TUBB2A;KATNAL1;KIFC2;MAP1A;TCP1;ARHGEF2;MAPT;GAS7;PLEC;SPTBN4;DCTN1;TWF2;KATNB1;CORO1A;CAMSAP1;CORO1B;HDAC6;NCKIPSD;MTA1;KIF3B;DPP9;KIF3A;KIF3C;FSD1;GAS2L1;CCT5;MARK2;DYNC1H1;MYO5A;MYO9B;SEPTIN9;TUBB4B;TUBB4A;LRPPRC;CCT6A;SY…
glutamatergic synapse (GO:0098978)	28/69	3.03807e-08	9.26611e-07	0	0	4.34902	75.2792	NLGN3;LRRC4;ARHGAP39;ABR;LRRTM3;OPHN1;SLITRK1;DLGAP1;BSN;DLGAP3;DLGAP2;DLGAP4;LRRC4B;CADPS2;GRIPAP1;VPS18;CADPS;ATP2B3;ATP2B2;SHISA7;RAB11A;BCR;LRFN5;LRFN4;AKAP9;NOS1AP;NPTXR;ADGRL3
axon (GO:0030424)	57/204	5.84259e-08	1.66319e-06	0	0	2.48071	41.3174	PTPRS;KCNC1;KCNC3;LRRK2;CPNE6;KCNC4;GRIK3;SLC8A2;ZFYVE27;ATCAY;TUBB3;KIF1C;KIF1B;NEFM;ACADM;KIF1A;BSN;VSTM5;NEFH;DSCAM;PLEKHG5;MUL1;CPT1C;MAPK8IP3;SRCIN1;DNM1;DNM2;BIN1;FEZ1;SCN8A;FEZ2;MAP1A;MAPT;DSCAML1;MTMR2;DCTN1;KCNA2;HDAC6;FXR2;SYT2;SYT1;KCNB1;DAB2IP;AZIN2;ATP2B3;SYT13;L1CAM;RAB11A;SETX;SLC8A3;PINK1;TAOK2;NF1;ADGRL1;CNTN2;ADGRL3;ZPR1
mitochondrial membrane (GO:0031966)	104/469	2.61702e-07	6.98416e-06	0	0	1.83184	27.7635	SLC27A1;NDUFA10;PHB2;ATCAY;PMPCB;PMPCA;SDHA;GCAT;AFG3L2;GNPAT;OXA1L;IFI27;UQCRC1;VDAC3;VDAC2;ULK1;VDAC1;UQCRC2;RAF1;EXD2;SHMT2;MRPL16;FOXO3;RCC1L;TIMM50;PGS1;LDHB;RHOT2;CYB5R3;RDH13;NDUFV1;RAB11FIP5;MOAP1;TRAP1;UQCC1;PDE2A;RMDN3;TIMM44;MRPL24;MRPL21;COQ5;ADCK1;OGDH;ALDH18A1;BCL2L2;CDS2;MRS2;SLC25A3;ACADVL;LRRK2;MRPL38;MRPL37;ECSIT;MRPL4;MRPL3;NGRN;AIFM3;AIFM1;MTG1;PLEKHN1;MRPL9;ACADM;USP30;TIMM29…
nuclear lumen (GO:0031981)	149/745	6.9942e-07	1.68733e-05	0	0	1.61291	22.8597	MAPKBP1;EIF4A3;FBXO25;HNRNPU;THUMPD3;ADARB1;NOC2L;RRP9;GLE1;GOLGA3;NUB1;OSBP;PDK3;TRIM27;MAF1;IER5;TSPYL2;MAGI1;NOM1;IK;AGTPBP1;COG7;MAP1S;NGDN;WDR74;ACSL5;CASK;IMP4;LARP4B;SDHA;HDHD3;ILF2;GTPBP4;FTSJ3;JMJD6;EBNA1BP2;ILF3;EWSR1;NCL;GRWD1;XRN2;WDFY3;ZCCHC8;DHX9;NOP2;NACC2;UTP20;NOP14;XRCC6;IQSEC1;UPF3A;PA2G4;PUM3;SMARCA4;SETX;ABTB1;TBL3;EIF6;STK24;GRB2;NOL10;NF2;ANP32B;TOP2B;RBM28;USP36;ACADVL;DOC…
early endosome (GO:0005769)	66/266	7.11288e-07	1.68733e-05	0	0	2.11178	29.8947	ANKRD13B;UHRF1BP1L;DAGLA;ZFYVE9;PTPN23;ZFYVE28;RNF157;AP4M1;RUSC1;WDR91;FLOT1;EPHB1;WASHC1;RUBCN;MAP2K1;PLA2G4E;VPS33A;VPS33B;LMTK2;OCRL;RUFY1;BACE1;WDR81;ALS2;RAPGEF1;PICK1;ATP6V0D1;GRIA1;RAB5B;RAB5C;MGRN1;TGFBRAP1;ABCB9;VPS26B;MTMR4;TRAK1;TM9SF4;ECPAS;NEURL1B;SNX27;TMEM127;RPS6KC1;VPS8;MICALL1;MVB12B;VPS11;STX6;MAPK1;ATP9A;RAB11FIP5;VPS16;TBC1D16;RAB4A;OSBPL6;SORT1;MYO5A;DNAJC13;BAIAP3;EHD1;FIG…
nucleolus (GO:0005730)	146/733	1.15416e-06	2.59382e-05	0	0	1.60367	21.9256	MAPKBP1;EIF4A3;FBXO25;THUMPD3;ADARB1;NOC2L;RRP9;GLE1;GOLGA3;NUB1;OSBP;PDK3;TRIM27;MAF1;IER5;TSPYL2;MAGI1;NOM1;AGTPBP1;COG7;MAP1S;NGDN;WDR74;ACSL5;CASK;IMP4;LARP4B;SDHA;HDHD3;ILF2;GTPBP4;FTSJ3;JMJD6;EBNA1BP2;ILF3;EWSR1;NCL;GRWD1;XRN2;WDFY3;ZCCHC8;DHX9;NOP2;NACC2;UTP20;NOP14;XRCC6;IQSEC1;UPF3A;PA2G4;PUM3;SMARCA4;ABTB1;TBL3;EIF6;STK24;GRB2;NOL10;NF2;ANP32B;TOP2B;RBM28;USP36;ACADVL;DOC2A;TUT4;PAK1IP1…
lytic vacuole membrane (GO:0098852)	63/267	7.43011e-06	0.000158633	0	0	1.97358	23.3079	SLC35F6;WDR41;ARRB1;ECE1;TCIRG1;SLC2A6;RPTOR;FLCN;ANXA6;FLOT1;VPS39;AP2M1;NSF;STARD3;VPS18;HGSNAT;SEC13;SZT2;SPHK2;PLA2G4E;VPS33A;AP1B1;AP3B1;ATP11A;ITFG2;TMEM150C;WDR81;DNAJC5;ATP6V1B2;ATP6V0D1;DEPDC5;KPTN;PI4K2A;SIDT2;SEH1L;RAB5C;NPRL2;NPRL3;GBA;ABHD6;ABCB9;TRPM2;NCSTN;VPS11;ATP6V0A1;VPS16;AP1M1;ABCA2;WDR59;AP3D1;HPS4;DNAJC13;MTOR;WDR11;RMC1;CLCN7;CLCN6;P2RX4;VPS41;PLEKHM2;UBA1;ATP13A2;TECPR1
synaptic membrane (GO:0097060)	13/26	1.02364e-05	0.000203766	0	0	6.34338	72.8827	GRIA1;MTMR2;DAGLA;ITGA3;PDE2A;HIP1R;ATP2B2;GRIN2B;SHISA7;RIMS4;SYNJ1;DLG4;AKAP9
small-subunit processome (GO:0032040)	16/37	1.04985e-05	0.000203766	0	0	4.83615	55.4429	NOP56;NOP14;NOP58;UTP6;WDR36;UTP4;UTP3;NGDN;NOC4L;IMP4;PWP2;NOL6;RRP9;UTP20;NOL10;DCAF13
recycling endosome (GO:0055037)	38/145	4.29404e-05	0.000797198	0	0	2.2613	22.739	GRIA1;ZFYVE27;TUBA1A;VPS51;VPS53;MICALL1;VPS52;TBC1D17;WASHC1;RAB11FIP3;RAB11FIP4;RAB8A;ATP9A;RAB11FIP5;VPS16;GRIPAP1;RAB4A;ATG9A;LMTK2;MYO5A;ATP11A;TUBG1;RAB11A;BAIAP3;EHD1;BACE1;EHD3;RAB15;MYO5B;ADPRH;RAB35;DENND6B;ULK1;VIPAS39;LZTR1;ABCG1;OPTN;RAN
peroxisome (GO:0005777)	34/128	7.93165e-05	0.00133851	0	0	2.30141	21.7301	ECI2;HSD17B4;HMGCR;AKAP11;DHRS7B;LONP2;NUDT17;MLYCD;USP30;DECR2;CRYM;PEX16;ACOT8;SZT2;ECH1;MUL1;MYO5A;SYT7;ALDH3A2;GNPAT;PEX7;PEX5L;AMACR;ACOX1;PEX6;IMPDH2;CAT;PEX5;NBR1;PIK3C3;TRIM37;ACOX3;TKT;CRAT
mitochondrial inner membrane (GO:0005743)	70/328	8.12768e-05	0.00133851	0	0	1.73295	16.3203	MRS2;SLC27A1;ACADVL;SLC25A3;LRRK2;NDUFA10;MRPL38;MRPL37;ECSIT;PHB2;MRPL4;MRPL3;AIFM3;AIFM1;MTG1;PMPCB;PMPCA;MRPL9;MRPS27;TIMM29;ACAD9;MRPL48;MRPL45;SDHA;GCAT;MRPS5;HADHB;AFG3L2;HADHA;MRPS9;BDH1;NOA1;SLC25A19;UQCRC1;SLC25A10;UQCRC2;MICU1;SLC25A12;SLC25A11;SLC25A14;SHMT2;SRC;TIMM9;MRPL16;SPG7;PPOX;FOXRED1;TIMM50;PGS1;LDHB;RDH13;NDUFV1;SLC25A22;PTCD3;TRAP1;AGK;UQCC1;PDE2A;IMMT;TIMM44;MRPL24;MRPL21;C…
90S preribosome (GO:0030686)	8/13	8.1502e-05	0.00133851	0	0	10.1355	95.4244	NOP14;TBL3;UTP4;BMS1;NOC4L;UTP20;KRI1;NOC2L
mitochondrial envelope (GO:0005740)	33/127	0.000158179	0.00250157	0	0	2.2329	19.5418	ACADVL;CLPB;LRRK2;TIMM9;ETFDH;HTRA2;PPOX;RCC1L;NGRN;ATCAY;AIFM1;ACADM;PLEKHN1;NDUFA9;TRAP1;TIMM29;AGK;ACAD9;SIRT5;DNM1;DNM2;HADHB;GNPAT;OXA1L;PINK1;IFI27;OGDH;VDAC2;VDAC1;NDUFS1;MICU1;NAT8L;THOP1
spindle (GO:0005819)	45/192	0.000165663	0.00252636	0	0	1.94971	16.9733	PHLPP2;CTDP1;HDAC3;NUMA1;DCTN1;CUL3;HNRNPU;KATNB1;AAAS;TTL;CCAR2;GOLGA2;FLCN;NGRN;MAEA;KIF3B;KIF3A;TPR;MAPK1;CLASP1;NUDC;ANAPC7;MAP1S;LIMK2;KLHL22;RMDN3;CSNK1D;TUBG2;TUBG1;EML1;EML2;WAPL;SIRT2;AGBL5;DIAPH1;WRAP73;NIN;NCOR1;KATNAL1;KIFC2;INCENP;CDC16;ERCC2;PKP4;MAD1L1
lysosomal membrane (GO:0005765)	69/330	0.000173234	0.00255072	0	0	1.68763	14.6163	SLC35F6;WDR41;AP2A1;ARRB1;ECE1;TCIRG1;AP2A2;SLC2A6;RPTOR;FLCN;ANXA6;FLOT1;VPS39;AP2M1;NSF;STARD3;VPS18;HGSNAT;SEC13;SZT2;SPHK2;PLA2G4E;VPS33A;AP1B1;AP3B1;ATP11A;ITFG2;TMEM150C;WDR81;DNAJC5;ATP6V1B2;ATP6V0D1;DEPDC5;KPTN;PI4K2A;SIDT2;SEH1L;RAB5C;NPRL2;NPRL3;GBA;CLEC16A;ABHD6;ABCB9;TRPM2;NCSTN;SYNGR1;VPS11;LRRC8A;ATP6V0A1;VPS16;AP1M1;ABCA2;WDR59;AP3D1;HPS4;DNAJC13;AP2B1;MTOR;WDR11;RMC1;CLCN7;CLCN6;P…
late endosome (GO:0005770)	44/189	0.000228155	0.00324741	0	0	1.93218	16.2023	ANKRD13B;SRC;CLEC16A;PIK3R4;ABHD6;VPS26B;HDAC6;ECPAS;TMEM25;WDR91;MICALL1;MVB12B;VPS11;ANXA6;MAPK1;AP5S1;VPS39;VPS16;STARD3;VPS18;RUBCN;MAP2K1;KIDINS220;VPS33A;ABCA3;ATG9A;MAGI2;VPS33B;MYO5A;GRIN2B;RAB11A;BAIAP3;RMC1;BACE1;FIG4;WDR81;SNX14;NBR1;VPS41;CHMP3;PIK3C3;ATP13A2;VIPAS39;CHMP7
ficolin-1-rich granule (GO:0101002)	43/184	0.000244428	0.0033668	0	0	1.94157	16.1472	PSMD12;VCP;HSP90AB1;UBR4;SLC2A3;TCIRG1;APEH;AP2A2;TRPM2;PSMD7;ACTR1B;PSMD2;SIRPA;MAPK1;CAPN1;LTA4H;ATG7;PGM1;ATP6V0A1;XRCC6;HSP90AA1;PTPRN2;JUP;PGAM1;HUWE1;EEF2;MAPK14;ILF2;PSMA5;ACLY;DYNC1LI1;DIAPH1;NFASC;PFKL;PKM;PSMC3;IMPDH1;IMPDH2;CAT;PSMC2;ACTR10;KPNB1;VPS35L
zonula adherens (GO:0005915)	5/6	0.000252578	0.00337033	0	0	31.6459	262.148	CAMSAP3;JUP;KIFC3;SORBS1;PLEKHA7
Cul4-RING E3 ubiquitin ligase complex (GO:0080008)	13/34	0.000314733	0.00407245	0	0	3.92504	31.6506	FBXW5;DCAF8;PLRG1;DCAF5;DCAF4;TRPC4AP;DCAF7;DCAF6;DCAF1;DDB1;DCAF11;DCAF13;WDTC1
ficolin-1-rich granule lumen (GO:1904813)	31/123	0.000438838	0.00551129	0	0	2.14183	16.5593	PSMD12;VCP;HSP90AB1;APEH;PSMD7;ACTR1B;PSMD2;MAPK1;CAPN1;LTA4H;ATG7;PGM1;XRCC6;HSP90AA1;JUP;PGAM1;HUWE1;EEF2;MAPK14;ILF2;PSMA5;ACLY;PFKL;PKM;PSMC3;IMPDH1;IMPDH2;CAT;PSMC2;ACTR10;KPNB1
preribosome, large subunit precursor (GO:0030687)	10/23	0.000465389	0.00567774	0	0	4.87415	37.3976	BOP1;EBNA1BP2;EIF6;LAS1L;PES1;PPAN;WDR74;NOC2L;WDR12;FTSJ3
SCF ubiquitin ligase complex (GO:0019005)	18/58	0.000503163	0.00596808	0	0	2.8553	21.6849	FBXW4;USP47;FBXW5;FBH1;FBXW7;FBXL19;FBXO38;CUL2;FBXO25;CUL1;FBXL16;FBXL14;FBXO31;SPSB3;FBXO6;BTRC;FBXO7;FBXL6
endosome membrane (GO:0010008)	66/325	0.000549061	0.00633646	0	0	1.62508	12.2	DAGLA;ZFYVE9;ARHGAP1;AP2A1;ECE1;TCIRG1;AP2A2;ZFYVE28;ZFYVE27;WDR91;KIF13A;ANXA6;EPHB1;VPS39;RAB8A;AP2M1;STARD3;PLA2G4E;VPS33B;RBSN;RUFY1;BACE1;WDR81;RAB35;ATP6V0D1;ABCG4;OPTN;GRIA1;RAB5B;RAB5C;CLEC16A;ABHD6;MTMR4;CORO1C;RHOBTB2;NCSTN;IRAK1;MICALL1;MVB12B;PIP5K1C;RAB11FIP3;RAB11FIP4;ATP9A;ATP6V0A1;RAB4A;OSBPL6;SORT1;AP3D1;DNAJC13;AP2B1;RAB11A;BAIAP3;RMC1;EHD1;FIG4;CLCN6;EHD3;SNX17;DOP1B;RAB15;VPS4…
mitotic spindle (GO:0072686)	30/120	0.000622185	0.0069914	0	0	2.11826	15.6376	PHLPP2;HDAC3;NUMA1;DCTN1;CUL3;HNRNPU;AAAS;GOLGA2;FLCN;NGRN;TPR;MAPK1;CLASP1;NUDC;LIMK2;KLHL22;TUBG1;EML1;EML2;WAPL;SIRT2;AGBL5;DIAPH1;WRAP73;NIN;NCOR1;KIFC2;CDC16;PKP4;MAD1L1
lysosome (GO:0005764)	90/477	0.000813161	0.00885426	0	0	1.48527	10.5671	SLC35F6;LRRK2;WDR41;RNF19B;ARRB1;ECE1;TCIRG1;SLC2A6;RPTOR;FLCN;ANXA6;FLOT1;CTSF;AP5S1;VPS39;AP2M1;NSF;STARD3;VPS18;ARSA;HGSNAT;HSP90AA1;SEC13;SZT2;USP5;SPHK2;USP4;PLA2G4E;VPS33A;PRKCD;VPS33B;AP1B1;TSC2;AP3B1;ATP11A;ITFG2;TMEM150C;BACE1;BCAN;WDR81;DNAJC5;ATP6V1B2;ATP6V0D1;DEPDC5;KPTN;PI4K2A;SIDT2;SEH1L;RAB5C;SRC;NPRL2;NPRL3;SDC3;STXBP2;GBA;ABHD6;ABCB9;TMEM25;TRPM2;NCSTN;RPS6KC1;VPS11;VPS16;AP1M1;A…
clathrin coat of coated pit (GO:0030132)	6/10	0.000829439	0.00885426	0	0	9.4956	67.369	SYNJ1;AP2A1;AP2B1;EPS15L1;AP2A2;AP2M1
intracellular organelle lumen (GO:0070013)	148/848	0.000857264	0.00892809	0	0	1.35502	9.56886	CYFIP1;TOR2A;OGDHL;ABAT;APEH;YARS2;CCAR2;PSMD7;PSMD2;FDXR;LONP1;PDK3;MLYCD;CAPN1;MMUT;PDK2;MEN1;MCCC2;ARSA;MECR;IGFBP5;GPT2;PUS1;MCCC1;POLRMT;ILF2;ACLY;BCAN;OXA1L;MXRA8;TFAM;SUCLG1;SCG3;ALDH7A1;KPNB1;GCDH;PSMD12;VCP;SHMT2;SDC3;FOXO3;LIAS;ACAT1;DGUOK;HSPH1;PITRM1;ESD;LTA4H;ATG7;PCK2;HSPA9;TRAP1;XRCC6;JUP;GOT2;TMEM132A;PDE2A;IDH2;TIMM44;PYCR2;EEF2;MCAT;ACADSB;ACSF3;COQ5;CS;P4HA1;NDUFAF7;OGDH;ACO2;G…

## Sheet: Module_1_KEGG
Term	Overlap	P.value	Adjusted.P.value	Old.P.value	Old.Adjusted.P.value	Odds.Ratio	Combined.Score	Genes
Phosphatidylinositol signaling system	40/98	2.8783e-11	8.43343e-09	0	0	4.40708	106.965	DGKG;CDS1;MTMR2;DGKD;MTMR3;INPP1;MTMR14;ITPR1;PIK3R2;PIK3CB;MTMR4;MTMR7;INPP5A;PPIP5K1;INPP5E;INPP5J;PIP5K1A;INPP5K;PIP4K2B;PIP4K2C;PLCG1;PIP5K1C;IP6K1;IP6K2;PRKCG;ITPK1;OCRL;SYNJ2;DGKZ;INPP4A;PLCB3;SYNJ1;DGKQ;PI4KA;PIK3C3;PI4KB;PLCD3;PLCD4;PI4K2A;CDS2
Inositol phosphate metabolism	31/73	1.48315e-09	2.17281e-07	0	0	4.70529	95.6543	MTMR2;ISYNA1;MTMR3;INPP1;MTMR14;PIK3CB;MTMR4;MTMR7;INPP5A;INPP5E;INPP5J;PIP5K1A;INPP5K;PIP4K2B;PIP4K2C;PLCG1;PIP5K1C;ITPK1;OCRL;SYNJ2;INPP4A;FIG4;PLCB3;SYNJ1;PI4KA;PIK3C3;PI4KB;PLCH2;PLCD3;PLCD4;PI4K2A
Autophagy	43/130	1.22238e-08	1.19386e-06	0	0	3.1566	57.5129	BECN1;MTMR3;MTMR14;PIK3R4;ITPR1;PIK3R2;PIK3CB;AMBRA1;MTMR4;ZFYVE1;CAMKK2;RPTOR;SUPT20;STK11;ATG101;AKT2;MLST8;AKT1;MAPK1;PRKACA;ATG7;RUBCN;MAP2K1;DAPK1;BAD;ATG9A;PRKCD;DAPK3;TSC2;TSC1;WIPI2;ATG13;MTOR;MAPK10;MRAS;ATG16L1;RPS6KB2;ATG2A;ATG4B;ULK1;PIK3C3;RAF1;ATG2B
Thyroid hormone signaling pathway	38/115	8.70213e-08	5.40888e-06	0	0	3.14782	51.1745	HDAC2;HDAC3;THRA;SRC;HDAC1;SLC2A1;PIK3R2;ATP1A2;PIK3CB;ATP1A1;MED16;SLC9A1;MED17;MED12;CASP9;MED14;AKT2;AKT1;MAPK1;PLCG1;PRKACA;PRKCG;NCOA1;MAP2K1;BAD;TSC2;MED27;MTOR;MED13L;KAT2A;PLCB3;MED24;NCOR1;RAF1;PLCD3;PLCD4;MYH6;PFKP
Pyruvate metabolism	19/38	9.23018e-08	5.40888e-06	0	0	6.3552	102.943	ACSS2;PCX;MDH1;ACYP1;ACACA;ACAT2;FH1;ACAT1;ALDH3A2;LDHB;LDHA;PKM;ALDH2;LDHD;ME3;DLAT;ALDH7A1;PCK2;ALDH9A1
Valine, leucine and isoleucine degradation	23/56	3.95679e-07	1.93223e-05	0	0	4.43232	65.3441	BCKDHA;ACAD8;MCCC2;ECHS1;MCCC1;ABAT;HSD17B10;ACADSB;ACSF3;ACAT2;ACAT1;HADHB;ALDH3A2;HADHA;ALDH2;PCCA;IVD;DBT;PCCB;ACADM;BCAT1;ALDH7A1;ALDH9A1
Propanoate metabolism	16/31	5.52679e-07	2.31336e-05	0	0	6.77296	97.5881	BCKDHA;ECHS1;ACSS2;ABAT;ACACA;ACAT2;ACAT1;LDHB;HADHA;LDHA;PCCA;DBT;PCCB;SUCLG1;ACADM;MLYCD
Citrate cycle (TCA cycle)	16/32	9.65024e-07	3.36562e-05	0	0	6.34928	87.9446	PCX;MDH1;IDH3G;IDH2;DLST;OGDHL;SDHA;FH1;CS;ACLY;IDH3B;OGDH;SUCLG1;DLAT;ACO2;PCK2
Longevity regulating pathway	33/102	1.03381e-06	3.36562e-05	0	0	3.04634	41.9855	HDAC2;CLPB;ATF6B;HDAC1;EHMT2;PRKAG2;ADCY3;PIK3R2;ADCY2;PIK3CB;ADCY1;FOXO3;ADCY6;ADCY5;CAMKK2;RPTOR;STK11;ATG101;AKT2;SESN1;AKT1;EIF4EBP2;PRKACA;EIF4E;TSC2;TSC1;ATG13;MTOR;CREB3;CAMK4;CAT;RPS6KB2;ULK1
Ubiquitin mediated proteolysis	40/138	1.92837e-06	5.65012e-05	0	0	2.60221	34.2421	CUL7;UBE3C;MGRN1;CUL3;CUL2;CUL1;KEAP1;NEDD4L;UBE3B;UBE2Z;PRPF19;RHOBTB2;FZR1;CDC23;HERC2;HERC1;UBE2Q1;UBR5;BTRC;PIAS4;UBE2I;PPIL2;FBXW8;ANAPC7;FBXW7;HUWE1;UBE4B;WWP2;DDB1;UBE2R2;UBE2S;CDC16;ANAPC4;UBE2O;UBA2;UBA1;TRIM37;TRIP12;ANAPC1;ANAPC2
Aminoacyl-tRNA biosynthesis	24/66	3.0266e-06	8.06177e-05	0	0	3.63339	46.1734	CARS;WARS;AARS2;VARS;TARSL2;SARS;DARS2;TARS;GATB;QRSL1;YARS2;NARS;KARS;QARS;LARS;RARS;GARS;TARS2;IARS2;HARS;VARS2;FARSA;AARS;FARSB
Gap junction	28/86	5.78291e-06	0.000141199	0	0	3.07127	37.0414	SRC;ITPR1;ADCY3;ADCY2;ADCY1;ADCY6;ADCY5;TUBA1C;TUBA1B;TUBB5;TUBA1A;TUBB3;MAPK1;PRKACA;MAP2K5;PRKCG;MAP2K1;CSNK1D;TUBB4B;TUBB4A;TUBA4A;TUBB2B;PLCB3;TUBB2A;GRB2;RAF1;SOS2;TUBA8
Cholinergic synapse	33/113	1.24118e-05	0.000279743	0	0	2.62579	29.6632	CAMK2B;CHRM3;CHRM1;CHRNA4;CHRM4;CAMK2A;CACNA1B;ITPR1;CACNA1A;ADCY3;PIK3R2;ADCY2;PIK3CB;ADCY1;ADCY6;ADCY5;AKT2;GNG7;AKT1;MAPK1;FYN;PRKACA;CAMK2G;CHRNB2;PRKCG;KCNJ4;MAP2K1;FOS;GNAO1;CREB3;PLCB3;CAMK4;KCNQ2
Phospholipase D signaling pathway	40/149	1.49056e-05	0.000300616	0	0	2.3381	25.9852	DGKG;SHC2;DGKD;ADCY3;PIK3R2;ADCY2;PIK3CB;ADCY1;ADCY6;AGPAT3;ADCY5;CYTH3;GRM4;AKT2;AKT1;PIP5K1A;PTK2B;MAPK1;FYN;PLCG1;PIP5K1C;RALGDS;CYTH1;MAP2K1;PLA2G4E;SPHK2;TSC2;TSC1;PTPN11;DGKZ;DNM1;MTOR;DNM2;PLCB3;MRAS;DGKQ;GRB2;RAF1;SOS2;RAPGEF3
Fatty acid degradation	19/50	1.53899e-05	0.000300616	0	0	3.89241	43.1349	GCDH;ACADVL;ECHS1;ECI2;ACSL5;CPT1C;ACADSB;ACAT2;ADH5;ACAT1;HADHB;ALDH3A2;HADHA;ALDH2;ACOX1;ACADM;ACOX3;ALDH7A1;ALDH9A1
Axon guidance	45/180	3.21658e-05	0.000589037	0	0	2.1245	21.9772	CAMK2B;SEMA7A;ROCK2;SRC;CAMK2A;LRRC4;PIK3R2;PIK3CB;SEMA3F;PRKCZ;RND1;DPYSL5;PLXNA2;SLIT1;PLXNA1;PAK6;MAPK1;FYN;PLCG1;SRGAP3;SRGAP2;EPHB1;CAMK2G;PLXNA4;EPHB3;PLXNA3;SEMA6C;NTNG2;SEMA4A;EPHA7;UNC5A;LIMK2;LIMK1;SEMA4F;PTPN11;SEMA4G;L1CAM;SSH3;PTK2;RGMA;EFNA3;PLXNB2;PLXNB1;RAF1;NGEF
Endocytosis	61/269	3.68994e-05	0.000635973	0	0	1.87234	19.1115	ARF3;ZFYVE9;ARPC1A;AP2A1;ARRB1;AP2A2;ZFYVE27;CAPZB;KIF5A;WASHC1;RAB8A;GIT1;WASHC2;AP2M1;PSD;EPS15L1;RBSN;ARFGAP1;DNM1;ARFGAP2;DNM2;RUFY1;ACAP3;BIN1;RAB35;CHMP3;CHMP7;H2-D1;RAB5B;RAB5C;SRC;AGAP2;NEDD4L;AGAP1;SNX32;ASAP1;VPS26B;AGAP3;PRKCZ;CYTH3;GRK3;GRK2;GRK6;MVB12B;PIP5K1A;PIP5K1C;RAB11FIP3;RAB11FIP4;CYTH1;RAB11FIP5;GIT2;RAB4A;IQSEC2;IQSEC1;IQSEC3;GBF1;AP2B1;RAB11A;EHD1;EHD3;VPS45
Progesterone-mediated oocyte maturation	27/90	4.41281e-05	0.000718308	0	0	2.72474	27.3248	HSP90AB1;ADCY3;PIK3R2;ADCY2;PIK3CB;ADCY1;ADCY6;ADCY5;FZR1;CDC23;AKT2;RPS6KA2;AKT1;MAPK1;PRKACA;HSP90AA1;MAP2K1;ANAPC7;MAPK14;MAPK10;MAPK11;CDC16;ANAPC4;RAF1;ANAPC1;MAD1L1;ANAPC2
RNA transport	42/167	4.99816e-05	0.000770769	0	0	2.14036	21.1978	CYFIP2;CYFIP1;POM121;SEH1L;RBM8A;EIF4A3;AAAS;FXR2;TGS1;TPR;XPO5;EIF4EBP2;NUP88;RAE1;EIF4E;NUP214;EIF5B;UPF1;PRMT5;EIF2B3;SEC13;UBE2I;NCBP1;NUP133;ELAC2;THOC3;UPF3A;THOC5;RANGAP1;SNUPN;SRRM1;DDX39B;EIF3I;ACIN1;EIF3C;EIF4G3;EIF3D;KPNB1;RAN;EIF3A;EIF4G1;EIF3B
Neurotrophin signaling pathway	33/121	5.72184e-05	0.000838249	0	0	2.38597	23.3077	CAMK2B;SHC2;CAMK2A;PIK3R2;PIK3CB;FOXO3;IKBKB;IRAK1;AKT2;RPS6KA2;AKT1;MAPK1;PLCG1;MAP2K7;CAMK2G;MAP2K5;MAP3K5;MAP2K1;BAD;SORT1;KIDINS220;PRKCD;MATK;PTPN11;MAPK14;MAPK10;MAPK11;CAMK4;RAPGEF1;GRB2;RAF1;SOS2;NFKBIB
Renal cell carcinoma	22/68	6.26329e-05	0.000847301	0	0	3.03804	29.4028	ARNT2;MAP2K1;EGLN2;BAD;TFE3;PRCC;CUL2;SLC2A1;PIK3R2;PTPN11;PIK3CB;FH1;VEGFA;FLCN;AKT2;RAPGEF1;AKT1;PAK6;MAPK1;GRB2;RAF1;SOS2
Lysine degradation	20/59	6.36199e-05	0.000847301	0	0	3.2565	31.4662	GCDH;KMT2D;SETD2;SETD3;ECHS1;EHMT2;KMT2B;PLOD3;DLST;PRDM2;ASH1L;ACAT2;ACAT1;ALDH3A2;HADHA;ALDH2;COLGALT1;ALDH7A1;EZH1;ALDH9A1
Aldosterone synthesis and secretion	29/102	6.98463e-05	0.000889781	0	0	2.52607	24.1725	CAMK2B;DAGLA;KCNK9;ATF6B;CAMK2A;ITPR1;ADCY3;ATP1A2;ADCY2;ADCY1;ATP1A1;CACNA1H;ADCY6;CACNA1G;ADCY5;CACNA1I;PRKACA;CAMK2G;PRKCG;PDE2A;ATP2B4;ATP2B3;ATP2B2;NR4A1;CREB3;PLCB3;CAMK4;CAMK1G;KCNK3
Oxytocin signaling pathway	39/154	7.75544e-05	0.000946809	0	0	2.15916	20.4354	CAMK2B;RYR2;ROCK2;SRC;NPR2;CAMK2A;ITPR1;PRKAG2;ADCY3;ADCY2;ADCY1;ADCY6;ADCY5;CAMKK2;TRPM2;CACNG7;RGS2;EEF2K;MAPK1;PRKACA;CACNG2;CAMK2G;MAP2K5;CACNG4;PRKCG;KCNJ4;MAP2K1;PLA2G4E;KCNJ9;CACNA2D3;FOS;EEF2;GNAO1;CACNB3;PLCB3;CAMK4;RAF1;PPP1R12B;CAMK1G
Insulin signaling pathway	36/139	8.77217e-05	0.0010281	0	0	2.22435	20.7784	PYGB;SHC2;PRKAG2;PIK3R2;PIK3CB;PRKCZ;ACACA;PTPRF;HK1;IKBKB;RPTOR;AKT2;MKNK2;PHKG2;FLOT1;AKT1;INPP5K;FLOT2;MAPK1;PRKACA;EIF4E;PCK2;MAP2K1;BAD;TSC2;TSC1;SORBS1;MTOR;MAPK10;PRKAR1B;FASN;RPS6KB2;RAPGEF1;GRB2;RAF1;SOS2
GnRH signaling pathway	26/90	0.000121613	0.00137048	0	0	2.58172	23.2734	CAMK2B;SRC;CAMK2A;ITPR1;ADCY3;ADCY2;ADCY1;ADCY6;ADCY5;PTK2B;MAPK1;PRKACA;MAP2K7;CAMK2G;MAP3K4;EGR1;MAP2K1;PLA2G4E;PRKCD;MAPK14;MAPK10;MAPK11;PLCB3;GRB2;RAF1;SOS2
AMPK signaling pathway	33/126	0.000134465	0.0014592	0	0	2.25704	20.1197	PRKAG2;PIK3R2;PIK3CB;HMGCR;FOXO3;ACACA;CAMKK2;RPTOR;STK11;EEF2K;PPP2R3D;AKT2;AKT1;MLYCD;RAB8A;PCK2;STRADA;STRADB;PPP2R5B;TSC2;TSC1;CPT1C;EEF2;MTOR;CREB3;PFKL;PPP2R2C;FASN;PPP2R2D;RPS6KB2;ULK1;PFKM;PFKP
Adrenergic signaling in cardiomyocytes	37/148	0.000155181	0.00162386	0	0	2.12117	18.6046	CAMK2B;RYR2;ATF6B;CAMK2A;ADCY3;ATP1A2;ADCY2;ADCY1;ATP1A1;ADCY6;SLC9A1;ADCY5;CACNG7;PPP2R3D;AKT2;AKT1;MAPK1;PRKACA;CACNG2;CAMK2G;CACNG4;CACNA2D3;PPP2R5B;ATP2B4;ATP2B3;ATP2B2;MAPK14;CREB3;MAPK11;CACNB3;PLCB3;PPP2R2C;PPP2R2D;SCN4B;RAPGEF3;MYH6;MYH7
VEGF signaling pathway	19/58	0.000161536	0.00163207	0	0	3.09253	27.0002	PRKCG;MAP2K1;SHC2;SPHK2;PLA2G4E;SRC;BAD;PIK3R2;PIK3CB;MAPK14;PTK2;VEGFA;CASP9;MAPK11;AKT2;AKT1;MAPK1;PLCG1;RAF1
Circadian entrainment	27/99	0.000259949	0.00253883	0	0	2.3829	19.6709	GRIA1;CAMK2B;RYR2;ADCYAP1R1;CAMK2A;ITPR1;ADCY3;ADCY2;ADCY1;CACNA1H;ADCY6;CACNA1G;ADCY5;CACNA1I;GNG7;MAPK1;NOS1;PRKACA;CAMK2G;PRKCG;KCNJ9;FOS;GRIN2B;GNAO1;PER1;PLCB3;NOS1AP
MAPK signaling pathway	62/294	0.000282731	0.00267227	0	0	1.7044	13.9267	RASGRF2;RASGRF1;ARRB1;ECSIT;IKBKB;AKT2;RPS6KA2;AKT1;PRKACA;MAP3K4;MAP3K5;PRKCG;MAP4K2;MAP2K1;DUSP1;PLA2G4E;CACNA2D3;FOS;MAPK8IP2;DUSP8;MAPK8IP3;MAPK8IP1;DUSP7;PPM1A;CACNB3;MRAS;MAPT;RAF1;SOS2;SRF;CACNA1B;CACNA1A;CACNA1E;CACNA1H;CACNA1G;CACNA1I;CACNG7;IRAK1;MKNK2;MAPK1;MAP2K7;CACNG2;MAP2K5;CACNG4;MAP4K4;GADD45B;MAPK14;GADD45G;VEGFA;MAPK10;NR4A1;MAPK11;PPP5C;EFNA3;TAOK3;TAOK2;NF1;GRB2;PTPN5;MAP3K11…
mTOR signaling pathway	37/154	0.000362229	0.00331666	0	0	2.01169	15.9391	SEH1L;NPRL2;MAPKAP1;NPRL3;PIK3R2;PIK3CB;IKBKB;RPTOR;FLCN;STK11;AKT2;RPS6KA2;DVL1;MLST8;AKT1;MAPK1;EIF4E;PRKCG;MAP2K1;SEC13;WDR59;STRADA;STRADB;TSC2;TSC1;MTOR;CLIP1;CASTOR2;RPS6KB2;ATP6V1B2;ULK1;GRB2;RAF1;DEPDC5;SGK1;SOS2;TELO2
Type II diabetes mellitus	16/48	0.000417665	0.00370836	0	0	3.1717	24.6784	KCNJ11;ABCC8;PRKCD;CACNA1B;CACNA1A;PIK3R2;PIK3CB;PRKCZ;CACNA1E;MTOR;HK1;CACNA1G;IKBKB;MAPK10;PKM;MAPK1
Glycolysis / Gluconeogenesis	20/67	0.000444743	0.00383264	0	0	2.70094	20.8459	ACSS2;PGAM1;ENO1;BPGM;ADH5;HK1;GPI1;ALDH3A2;LDHB;LDHA;PFKL;PKM;ALDH2;DLAT;ALDH7A1;PFKM;PGM1;PFKP;ALDH9A1;PCK2
Mitophagy	19/63	0.000531129	0.00444631	0	0	2.74031	20.6633	BECN1;USP15;SRC;ATG9A;TFE3;AMBRA1;FOXO3;MAPK10;RHOT2;PINK1;TBK1;MRAS;NBR1;MFN2;ULK1;USP30;TBC1D17;OPTN;TBC1D15
Choline metabolism in cancer	26/99	0.000630681	0.00513304	0	0	2.26224	16.6698	DGKG;DGKD;PIK3R2;PIK3CB;AKT2;AKT1;PIP5K1A;MAPK1;PLCG1;PIP5K1C;RALGDS;PRKCG;MAP2K1;PCYT1B;PLA2G4E;TSC2;TSC1;FOS;DGKZ;MTOR;MAPK10;DGKQ;RPS6KB2;GRB2;RAF1;SOS2
Central carbon metabolism in cancer	19/64	0.000659875	0.00522434	0	0	2.67926	19.6215	MAP2K1;GLS2;PGAM1;SLC2A1;PIK3R2;PIK3CB;MTOR;HK1;LDHA;PFKL;PKM;AKT2;G6PDX;AKT1;MAPK1;RAF1;PFKM;PFKP;FGFR1
ErbB signaling pathway	23/84	0.00067756	0.00522434	0	0	2.39391	17.4684	PRKCG;CAMK2B;MAP2K1;SHC2;SRC;BAD;CAMK2A;PIK3R2;PIK3CB;MTOR;PTK2;MAPK10;AKT2;RPS6KB2;AKT1;PAK6;MAPK1;GRB2;PLCG1;RAF1;MAP2K7;SOS2;CAMK2G
Arginine and proline metabolism	16/50	0.000697561	0.00524065	0	0	2.98478	21.6931	GOT1;ODC1;GOT2;AZIN2;SAT2;PYCR2;CNDP2;SRM;ALDH3A2;CKMT1;ALDH2;P4HA1;NOS1;ALDH18A1;ALDH7A1;ALDH9A1
Apelin signaling pathway	33/138	0.000798519	0.00582002	0	0	1.99769	14.249	RYR2;BECN1;HDAC5;PIK3R4;ITPR1;PRKAG2;ADCY3;ADCY2;ADCY1;ADCY6;SLC8A2;SLC9A1;ADCY5;AKT2;GNG7;AKT1;MAPK1;NOS1;PRKACA;MEF2D;EGR1;MAP2K1;SMAD4;SPHK2;MTOR;SLC8A3;PLCB3;MRAS;CAMK4;RPS6KB2;TFAM;PIK3C3;RAF1
Proteasome	15/46	0.000814406	0.00582002	0	0	3.06843	21.8259	PSMD12;ADRM1;PSMA7;PSMA5;PSMC5;PSMD7;PSMC6;PSMA4;PSMC3;PSMC4;PSMD2;PSMC1;PSMC2;PSMD1;PSMF1
Insulin secretion	23/86	0.000965696	0.00673688	0	0	2.31765	16.0906	PRKCG;CAMK2B;CHRM3;RYR2;ADCYAP1R1;ATF6B;KCNJ11;ABCC8;CAMK2A;SLC2A1;ADCY3;ATP1A2;ADCY2;ADCY1;ATP1A1;ADCY6;ADCY5;CREB3;PLCB3;KCNMA1;PRKACA;CAMK2G;TRPM4
Chronic myeloid leukemia	21/76	0.00100106	0.00680367	0	0	2.42325	16.7366	MAP2K1;SHC2;HDAC2;SMAD4;CTBP2;GADD45B;HDAC1;CTBP1;BAD;PIK3R2;PTPN11;PIK3CB;GADD45G;IKBKB;BCR;AKT2;AKT1;MAPK1;GRB2;RAF1;SOS2
Glucagon signaling pathway	26/102	0.00102171	0.00680367	0	0	2.17256	14.9609	CAMK2B;PYGB;CAMK2A;ITPR1;SLC2A1;PRKAG2;ADCY2;ACACA;LDHB;LDHA;PPP4C;AKT2;PHKG2;AKT1;PRKACA;CAMK2G;PCK2;PRMT1;PGAM1;PPP4R3A;PPP4R3B;CPT1C;CREB3;PLCB3;PFKL;PKM
Morphine addiction	24/92	0.00110811	0.00721503	0	0	2.24077	15.2486	PRKCG;GABBR2;PDE1B;KCNJ9;PDE2A;CACNA1B;ADCY3;CACNA1A;ARRB1;ADCY2;ADCY1;ADCY6;ADCY5;GNAO1;GRK3;GRK2;PDE10A;GNG7;GRK6;ADORA1;PDE4A;PDE8B;PRKACA;GABRD
Glutamatergic synapse	28/114	0.00124311	0.00789876	0	0	2.06795	13.8349	GRIA1;GLS2;GRIK5;ITPR1;GRIK3;CACNA1A;ADCY3;ADCY2;ADCY1;ADCY6;ADCY5;GRK3;GRK2;GRM4;GNG7;MAPK1;DLGAP1;SLC17A7;PRKACA;PRKCG;PLA2G4E;GRIN2B;GNAO1;PLCB3;DLG4;SHANK3;SHANK2;SHANK1
Purine metabolism	32/136	0.00126704	0.00789876	0	0	1.95517	13.0431	PDE1B;NPR2;GMPR2;GMPR;ADCY3;ADCY2;AK5;ADCY1;NT5C2;ADCY6;ADCY5;PAPSS1;DGUOK;ATIC;PDE4A;PDE8B;PGM1;ENTPD4B;ADSL;ENTPD4;ENTPD6;PDE2A;AMPD2;PAICS;NUDT9;PKM;PDE10A;NME7;IMPDH1;IMPDH2;PDE9A;ITPA
Colorectal cancer	23/88	0.00135391	0.00810701	0	0	2.24607	14.8348	APC2;MAP2K1;SMAD4;GADD45B;BAD;AXIN1;PIK3R2;PIK3CB;FOS;MTOR;GADD45G;CASP9;MAPK10;MSH2;MSH3;AKT2;RPS6KB2;AKT1;MAPK1;GRB2;RAF1;SOS2;RALGDS
Relaxin signaling pathway	31/131	0.00135578	0.00810701	0	0	1.96957	13.0058	SHC2;ATF6B;SRC;ADCY3;PIK3R2;ARRB1;ADCY2;PIK3CB;ADCY1;PRKCZ;ADCY6;ADCY5;AKT2;GNG7;AKT1;MAPK1;NOS1;PRKACA;MAP2K7;MAP2K1;FOS;MAPK14;VEGFA;GNAO1;MAPK10;CREB3;MAPK11;PLCB3;GRB2;RAF1;SOS2
RNA degradation	22/83	0.001399	0.00819817	0	0	2.28899	15.0432	HSPA9;DIS3L;PARN;LSM1;WDR61;CNOT10;ENO1;TENT4A;EDC4;PFKL;EXOSC10;CNOT1;EXOSC9;XRN2;EXOSC8;MTREX;SKIV2L;CNOT8;EXOSC2;DCPS;PFKM;PFKP

## Sheet: Module_1_BPred
go	cluster	parent	parentSimScore	score	size	term	parentTerm
GO:0006468	1	GO:0006468	0.972	725	725	protein phosphorylation	protein phosphorylation
GO:0015031	2	GO:0015031	0.983	623	623	protein transport	protein transport
GO:0016310	1	GO:0006468	0.933	588	588	phosphorylation	protein phosphorylation
GO:0043065	3	GO:0043065	0.994	421	421	positive regulation of apoptotic process	positive regulation of apoptotic process
GO:0016567	4	GO:0016567	0.992	379	379	protein ubiquitination	protein ubiquitination
GO:0006511	5	GO:0006511	0.994	361	361	ubiquitin-dependent protein catabolic process	ubiquitin-dependent protein catabolic process
GO:0006397	6	GO:0006397	0.994	349	349	mRNA processing	mRNA processing
GO:0006886	2	GO:0015031	0.904	310	310	intracellular protein transport	protein transport
GO:0007411	7	GO:0007411	0.997	249	249	axon guidance	axon guidance
GO:0018105	4	GO:0016567	0.508	231	231	peptidyl-serine phosphorylation	protein ubiquitination
GO:0043161	5	GO:0006511	0.942	223	223	proteasome-mediated ubiquitin-dependent protein catabolic process	ubiquitin-dependent protein catabolic process
GO:0046777	1	GO:0006468	0.708	223	223	protein autophosphorylation	protein phosphorylation
GO:0007268	8	GO:0007268	0.989	220	220	chemical synaptic transmission	chemical synaptic transmission
GO:0000209	4	GO:0016567	0.897	215	215	protein polyubiquitination	protein ubiquitination
GO:0050821	9	GO:0050821	0.999	209	209	protein stabilization	protein stabilization
GO:0007420	7	GO:0007411	0.553	201	201	brain development	axon guidance
GO:0072659	2	GO:0015031	0.685	200	200	protein localization to plasma membrane	protein transport
GO:0031175	7	GO:0007411	0.832	190	190	neuron projection development	axon guidance
GO:0000398	6	GO:0006397	0.936	180	180	mRNA splicing, via spliceosome	mRNA processing
GO:0043547	10	GO:0043547	0.998	174	174	positive regulation of GTPase activity	positive regulation of GTPase activity
GO:0006364	11	GO:0006364	0.998	149	149	rRNA processing	rRNA processing
GO:0051726	12	GO:0051726	0.99	148	148	regulation of cell cycle	regulation of cell cycle
GO:0006417	13	GO:0006417	0.996	145	145	regulation of translation	regulation of translation
GO:0016579	4	GO:0016567	0.807	131	131	protein deubiquitination	protein ubiquitination
GO:0007409	7	GO:0007411	0.93	127	127	axonogenesis	axon guidance
GO:0050804	8	GO:0007268	0.943	122	122	modulation of chemical synaptic transmission	chemical synaptic transmission
GO:0006338	14	GO:0006338	0.999	122	122	chromatin remodeling	chromatin remodeling
GO:0042254	11	GO:0006364	0.947	107	107	ribosome biogenesis	rRNA processing
GO:0090630	10	GO:0043547	0.928	106	106	activation of GTPase activity	positive regulation of GTPase activity
GO:0007005	14	GO:0006338	0.462	104	104	mitochondrion organization	chromatin remodeling
GO:0007264	15	GO:0007264	0.996	101	101	small GTPase mediated signal transduction	small GTPase mediated signal transduction
GO:0043087	10	GO:0043547	0.967	92	92	regulation of GTPase activity	positive regulation of GTPase activity
GO:0051028	16	GO:0051028	0.999	90	90	mRNA transport	mRNA transport
GO:0018107	4	GO:0016567	0.463	89	89	peptidyl-threonine phosphorylation	protein ubiquitination
GO:0048812	7	GO:0007411	0.89	89	89	neuron projection morphogenesis	axon guidance
GO:0010508	5	GO:0006511	0.608	88	88	positive regulation of autophagy	ubiquitin-dependent protein catabolic process
GO:0034613	2	GO:0015031	0.856	85	85	cellular protein localization	protein transport
GO:0050808	17	GO:0050808	0.994	85	85	synapse organization	synapse organization
GO:0009267	18	GO:0009267	0.999	82	82	cellular response to starvation	cellular response to starvation
GO:0010506	5	GO:0006511	0.648	74	74	regulation of autophagy	ubiquitin-dependent protein catabolic process
GO:0000165	1	GO:0006468	0.834	73	73	MAPK cascade	protein phosphorylation
GO:0048666	7	GO:0007411	0.814	69	69	neuron development	axon guidance
GO:0031146	5	GO:0006511	0.785	68	68	SCF-dependent proteasomal ubiquitin-dependent protein catabolic process	ubiquitin-dependent protein catabolic process
GO:0006635	19	GO:0006635	0.999	63	63	fatty acid beta-oxidation	fatty acid beta-oxidation
GO:0031122	20	GO:0031122	1	63	63	cytoplasmic microtubule organization	cytoplasmic microtubule organization
GO:0048813	7	GO:0007411	0.781	58	58	dendrite morphogenesis	axon guidance
GO:0032456	2	GO:0015031	0.376	58	58	endocytic recycling	protein transport
GO:0010507	5	GO:0006511	0.578	54	54	negative regulation of autophagy	ubiquitin-dependent protein catabolic process
GO:0007346	12	GO:0051726	0.908	53	53	regulation of mitotic cell cycle	regulation of cell cycle
GO:0010975	21	GO:0010975	0.994	50	50	regulation of neuron projection development	regulation of neuron projection development
GO:0042149	18	GO:0009267	0.896	50	50	cellular response to glucose starvation	cellular response to starvation
GO:0050772	21	GO:0010975	0.833	50	50	positive regulation of axonogenesis	regulation of neuron projection development
GO:0048013	22	GO:0048013	1	50	50	ephrin receptor signaling pathway	ephrin receptor signaling pathway
GO:0006836	23	GO:0006836	0.997	49	49	neurotransmitter transport	neurotransmitter transport
GO:0006406	2	GO:0015031	0.686	49	49	mRNA export from nucleus	protein transport
GO:0006890	23	GO:0006836	0.323	49	49	retrograde vesicle-mediated transport, Golgi to endoplasmic reticulum	neurotransmitter transport
GO:0032007	15	GO:0007264	0.503	46	46	negative regulation of TOR signaling	small GTPase mediated signal transduction
GO:0006464	4	GO:0016567	0.706	45	45	cellular protein modification process	protein ubiquitination
GO:0000422	14	GO:0006338	0.388	44	44	autophagy of mitochondrion	chromatin remodeling
GO:0016236	5	GO:0006511	0.646	42	42	macroautophagy	ubiquitin-dependent protein catabolic process
GO:2000463	24	GO:2000463	1	42	42	positive regulation of excitatory postsynaptic potential	positive regulation of excitatory postsynaptic potential
GO:0016573	14	GO:0006338	0.687	42	42	histone acetylation	chromatin remodeling
GO:0043967	14	GO:0006338	0.639	40	40	histone H4 acetylation	chromatin remodeling
GO:2000311	10	GO:0043547	0.478	39	39	regulation of AMPA receptor activity	positive regulation of GTPase activity
GO:0007269	8	GO:0007268	0.85	38	38	neurotransmitter secretion	chemical synaptic transmission
GO:0010498	5	GO:0006511	0.917	36	36	proteasomal protein catabolic process	ubiquitin-dependent protein catabolic process
GO:0050806	8	GO:0007268	0.854	36	36	positive regulation of synaptic transmission	chemical synaptic transmission
GO:0051966	8	GO:0007268	0.737	34	34	regulation of synaptic transmission, glutamatergic	chemical synaptic transmission
GO:0008089	20	GO:0031122	0.572	34	34	anterograde axonal transport	cytoplasmic microtubule organization
GO:1900182	2	GO:0015031	0.598	32	32	positive regulation of protein localization to nucleus	protein transport
GO:0050770	21	GO:0010975	0.891	31	31	regulation of axonogenesis	regulation of neuron projection development
GO:0098962	10	GO:0043547	0.464	30	30	regulation of postsynaptic neurotransmitter receptor activity	positive regulation of GTPase activity
GO:0033365	2	GO:0015031	0.773	30	30	protein localization to organelle	protein transport
GO:1903861	21	GO:0010975	0.739	29	29	positive regulation of dendrite extension	regulation of neuron projection development
GO:0043044	14	GO:0006338	0.9	28	28	ATP-dependent chromatin remodeling	chromatin remodeling
GO:0010821	14	GO:0006338	0.413	27	27	regulation of mitochondrion organization	chromatin remodeling
GO:0061001	17	GO:0050808	0.779	26	26	regulation of dendritic spine morphogenesis	synapse organization
GO:1902017	21	GO:0010975	0.756	26	26	regulation of cilium assembly	regulation of neuron projection development
GO:0060261	13	GO:0006417	0.385	25	25	positive regulation of transcription initiation from RNA polymerase II promoter	regulation of translation
GO:0000462	11	GO:0006364	0.854	25	25	maturation of SSU-rRNA from tricistronic rRNA transcript (SSU-rRNA, 5.8S rRNA, LSU-rRNA)	rRNA processing
GO:0072657	2	GO:0015031	0.744	25	25	protein localization to membrane	protein transport
GO:0046488	1	GO:0006468	0.565	24	24	phosphatidylinositol metabolic process	protein phosphorylation
GO:0090316	2	GO:0015031	0.728	24	24	positive regulation of intracellular protein transport	protein transport
GO:0061564	7	GO:0007411	0.92	23	23	axon development	axon guidance
GO:0060071	8	GO:0007268	0.6	23	23	Wnt signaling pathway, planar cell polarity pathway	chemical synaptic transmission
GO:0044772	12	GO:0051726	0.705	22	22	mitotic cell cycle phase transition	regulation of cell cycle
GO:0051899	9	GO:0050821	0.379	22	22	membrane depolarization	protein stabilization
GO:0061136	5	GO:0006511	0.824	22	22	regulation of proteasomal protein catabolic process	ubiquitin-dependent protein catabolic process
GO:0031145	5	GO:0006511	0.725	21	21	anaphase-promoting complex-dependent catabolic process	ubiquitin-dependent protein catabolic process
GO:0051056	15	GO:0007264	0.943	21	21	regulation of small GTPase mediated signal transduction	small GTPase mediated signal transduction
GO:0046855	1	GO:0006468	0.456	21	21	inositol phosphate dephosphorylation	protein phosphorylation
GO:0031929	15	GO:0007264	0.546	21	21	TOR signaling	small GTPase mediated signal transduction
GO:2000060	5	GO:0006511	0.821	20	20	positive regulation of ubiquitin-dependent protein catabolic process	ubiquitin-dependent protein catabolic process
GO:1903827	2	GO:0015031	0.728	20	20	regulation of cellular protein localization	protein transport
GO:0032434	5	GO:0006511	0.841	19	19	regulation of proteasomal ubiquitin-dependent protein catabolic process	ubiquitin-dependent protein catabolic process
GO:0098887	2	GO:0015031	0.622	19	19	neurotransmitter receptor transport, endosome to postsynaptic membrane	protein transport
GO:0051963	17	GO:0050808	0.856	19	19	regulation of synapse assembly	synapse organization
GO:0006661	1	GO:0006468	0.518	18	18	phosphatidylinositol biosynthetic process	protein phosphorylation
GO:0048024	6	GO:0006397	0.855	18	18	regulation of mRNA splicing, via spliceosome	mRNA processing
GO:0006405	2	GO:0015031	0.65	17	17	RNA export from nucleus	protein transport
GO:1901800	5	GO:0006511	0.782	16	16	positive regulation of proteasomal protein catabolic process	ubiquitin-dependent protein catabolic process
GO:0016242	5	GO:0006511	0.543	16	16	negative regulation of macroautophagy	ubiquitin-dependent protein catabolic process
GO:0048667	7	GO:0007411	0.903	16	16	cell morphogenesis involved in neuron differentiation	axon guidance
GO:0035435	25	GO:0035435	1	16	16	phosphate ion transmembrane transport	phosphate ion transmembrane transport
GO:0006996	21	GO:0010975	0.514	15	15	organelle organization	regulation of neuron projection development
GO:0009083	19	GO:0006635	0.746	15	15	branched-chain amino acid catabolic process	fatty acid beta-oxidation
GO:0032446	4	GO:0016567	0.982	14	14	protein modification by small protein conjugation	protein ubiquitination
GO:1902287	7	GO:0007411	0.767	14	14	semaphorin-plexin signaling pathway involved in axon guidance	axon guidance
GO:2000785	5	GO:0006511	0.538	13	13	regulation of autophagosome assembly	ubiquitin-dependent protein catabolic process
GO:0009062	19	GO:0006635	0.966	13	13	fatty acid catabolic process	fatty acid beta-oxidation
GO:0010564	12	GO:0051726	0.93	13	13	regulation of cell cycle process	regulation of cell cycle
GO:0021955	7	GO:0007411	0.739	12	12	central nervous system neuron axonogenesis	axon guidance
GO:1903358	26	GO:1903358	1	12	12	regulation of Golgi organization	regulation of Golgi organization
GO:0038202	15	GO:0007264	0.5	11	11	TORC1 signaling	small GTPase mediated signal transduction
GO:0010389	12	GO:0051726	0.757	11	11	regulation of G2/M transition of mitotic cell cycle	regulation of cell cycle
GO:0043068	3	GO:0043065	0.991	11	11	positive regulation of programmed cell death	positive regulation of apoptotic process
GO:0031669	18	GO:0009267	0.984	11	11	cellular response to nutrient levels	cellular response to starvation
GO:0016070	6	GO:0006397	0.626	11	11	RNA metabolic process	mRNA processing
GO:0006012	19	GO:0006635	0.43	11	11	galactose metabolic process	fatty acid beta-oxidation
GO:0048311	27	GO:0048311	1	11	11	mitochondrion distribution	mitochondrion distribution
GO:1901990	12	GO:0051726	0.845	10	10	regulation of mitotic cell cycle phase transition	regulation of cell cycle
GO:0072594	2	GO:0015031	0.816	10	10	establishment of protein localization to organelle	protein transport
GO:0019941	5	GO:0006511	0.992	10	10	modification-dependent protein catabolic process	ubiquitin-dependent protein catabolic process
GO:0051646	27	GO:0048311	0.934	10	10	mitochondrion localization	mitochondrion distribution
GO:1903146	14	GO:0006338	0.365	9	9	regulation of autophagy of mitochondrion	chromatin remodeling
GO:0098815	24	GO:2000463	0.971	9	9	modulation of excitatory postsynaptic potential	positive regulation of excitatory postsynaptic potential
GO:2000641	2	GO:0015031	0.337	9	9	regulation of early endosome to late endosome transport	protein transport
GO:0031123	6	GO:0006397	0.715	9	9	RNA 3'-end processing	mRNA processing
GO:0046578	15	GO:0007264	0.933	9	9	regulation of Ras protein signal transduction	small GTPase mediated signal transduction
GO:0097061	17	GO:0050808	0.822	8	8	dendritic spine organization	synapse organization
GO:1902531	15	GO:0007264	0.699	8	8	regulation of intracellular signal transduction	small GTPase mediated signal transduction
GO:0036498	28	GO:0036498	1	8	8	IRE1-mediated unfolded protein response	IRE1-mediated unfolded protein response
GO:0051168	2	GO:0015031	0.417	8	8	nuclear export	protein transport
GO:0016570	14	GO:0006338	0.755	8	8	histone modification	chromatin remodeling
GO:0035065	14	GO:0006338	0.621	8	8	regulation of histone acetylation	chromatin remodeling
GO:0031346	21	GO:0010975	0.905	8	8	positive regulation of cell projection organization	regulation of neuron projection development
GO:0060341	2	GO:0015031	0.423	8	8	regulation of cellular localization	protein transport
GO:0033540	19	GO:0006635	0.844	8	8	fatty acid beta-oxidation using acyl-CoA oxidase	fatty acid beta-oxidation
GO:0016241	5	GO:0006511	0.597	7	7	regulation of macroautophagy	ubiquitin-dependent protein catabolic process
GO:0090114	23	GO:0006836	0.318	7	7	COPII-coated vesicle budding	neurotransmitter transport
GO:1903432	15	GO:0007264	0.493	7	7	regulation of TORC1 signaling	small GTPase mediated signal transduction
GO:0043687	4	GO:0016567	0.411	7	7	post-translational protein modification	protein ubiquitination
GO:0080135	28	GO:0036498	0.494	6	6	regulation of cellular response to stress	IRE1-mediated unfolded protein response
GO:0060627	23	GO:0006836	0.413	6	6	regulation of vesicle-mediated transport	neurotransmitter transport
GO:0032210	14	GO:0006338	0.546	6	6	regulation of telomere maintenance via telomerase	chromatin remodeling
GO:0050658	16	GO:0051028	0.964	6	6	RNA transport	mRNA transport
GO:0046474	1	GO:0006468	0.554	6	6	glycerophospholipid biosynthetic process	protein phosphorylation
GO:0000466	11	GO:0006364	0.823	5	5	maturation of 5.8S rRNA from tricistronic rRNA transcript (SSU-rRNA, 5.8S rRNA, LSU-rRNA)	rRNA processing
GO:0009063	19	GO:0006635	0.847	5	5	cellular amino acid catabolic process	fatty acid beta-oxidation
GO:0098969	2	GO:0015031	0.651	5	5	neurotransmitter receptor transport to postsynaptic membrane	protein transport
GO:0035303	1	GO:0006468	0.56	4	4	regulation of dephosphorylation	protein phosphorylation
GO:1902285	7	GO:0007411	0.776	4	4	semaphorin-plexin signaling pathway involved in neuron projection guidance	axon guidance
GO:0099601	10	GO:0043547	0.509	4	4	regulation of neurotransmitter receptor activity	positive regulation of GTPase activity
GO:0033043	21	GO:0010975	0.72	4	4	regulation of organelle organization	regulation of neuron projection development
GO:1904872	16	GO:0051028	0.743	4	4	regulation of telomerase RNA localization to Cajal body	mRNA transport
GO:1900034	28	GO:0036498	0.361	4	4	regulation of cellular response to heat	IRE1-mediated unfolded protein response
GO:1990928	18	GO:0009267	0.905	4	4	response to amino acid starvation	cellular response to starvation
GO:0051128	21	GO:0010975	0.787	3	3	regulation of cellular component organization	regulation of neuron projection development
GO:2001257	23	GO:0006836	0.367	3	3	regulation of cation channel activity	neurotransmitter transport
GO:0031644	24	GO:2000463	0.881	3	3	regulation of nervous system process	positive regulation of excitatory postsynaptic potential
GO:0033184	14	GO:0006338	0.531	2	2	positive regulation of histone ubiquitination	chromatin remodeling
GO:0009081	19	GO:0006635	0.54	2	2	branched-chain amino acid metabolic process	fatty acid beta-oxidation
GO:0034470	6	GO:0006397	0.806	2	2	ncRNA processing	mRNA processing
GO:1901987	12	GO:0051726	0.858	2	2	regulation of cell cycle phase transition	regulation of cell cycle
GO:0044839	12	GO:0051726	0.637	2	2	cell cycle G2/M phase transition	regulation of cell cycle
GO:0046838	1	GO:0006468	0.459	2	2	phosphorylated carbohydrate dephosphorylation	protein phosphorylation
GO:0098930	20	GO:0031122	0.586	2	2	axonal transport	cytoplasmic microtubule organization
GO:0043647	19	GO:0006635	0.461	2	2	inositol phosphate metabolic process	fatty acid beta-oxidation
GO:1904871	2	GO:0015031	0.448	2	2	positive regulation of protein localization to Cajal body	protein transport
GO:0016482	2	GO:0015031	0.413	2	2	cytosolic transport	protein transport
GO:1902532	15	GO:0007264	0.615	2	2	negative regulation of intracellular signal transduction	small GTPase mediated signal transduction
GO:1903305	23	GO:0006836	0.372	2	2	regulation of regulated secretory pathway	neurotransmitter transport
GO:0010256	26	GO:1903358	0.749	2	2	endomembrane system organization	regulation of Golgi organization
GO:0022618	11	GO:0006364	0.836	2	2	ribonucleoprotein complex assembly	rRNA processing
GO:0071545	19	GO:0006635	0.696	1	1	inositol phosphate catabolic process	fatty acid beta-oxidation
GO:0031058	14	GO:0006338	0.646	1	1	positive regulation of histone modification	chromatin remodeling
GO:0090219	10	GO:0043547	0.474	1	1	negative regulation of lipid kinase activity	positive regulation of GTPase activity
GO:0009152	1	GO:0006468	0.569	1	1	purine ribonucleotide biosynthetic process	protein phosphorylation
GO:0006354	6	GO:0006397	0.386	1	1	DNA-templated transcription, elongation	mRNA processing
GO:0097711	27	GO:0048311	0.499	1	1	ciliary basal body-plasma membrane docking	mitochondrion distribution
GO:1903649	2	GO:0015031	0.352	0	0	regulation of cytoplasmic transport	protein transport
GO:0099643	8	GO:0007268	0.841	0	0	signal release from synapse	chemical synaptic transmission
GO:0071427	2	GO:0015031	0.686	0	0	mRNA-containing ribonucleoprotein complex export from nucleus	protein transport
GO:0018209	4	GO:0016567	0.511	0	0	peptidyl-serine modification	protein ubiquitination
GO:0051336	10	GO:0043547	0.846	0	0	regulation of hydrolase activity	positive regulation of GTPase activity
GO:0000377	6	GO:0006397	0.785	0	0	RNA splicing, via transesterification reactions with bulged adenosine as nucleophile	mRNA processing
GO:0031329	5	GO:0006511	0.713	0	0	regulation of cellular catabolic process	ubiquitin-dependent protein catabolic process
GO:0034250	13	GO:0006417	0.881	0	0	positive regulation of cellular amide metabolic process	regulation of translation
GO:1902116	21	GO:0010975	0.512	0	0	negative regulation of organelle assembly	regulation of neuron projection development
GO:1903859	21	GO:0010975	0.747	0	0	regulation of dendrite extension	regulation of neuron projection development
GO:0019751	19	GO:0006635	0.493	0	0	polyol metabolic process	fatty acid beta-oxidation
GO:1904869	2	GO:0015031	0.448	0	0	regulation of protein localization to Cajal body	protein transport
GO:0018210	4	GO:0016567	0.465	0	0	peptidyl-threonine modification	protein ubiquitination
GO:0099177	8	GO:0007268	0.941	0	0	regulation of trans-synaptic signaling	chemical synaptic transmission
GO:1902930	19	GO:0006635	0.457	0	0	regulation of alcohol biosynthetic process	fatty acid beta-oxidation
GO:0120039	7	GO:0007411	0.889	0	0	plasma membrane bounded cell projection morphogenesis	axon guidance

## Sheet: Module_1_CCred
go	cluster	parent	parentSimScore	score	size	term	parentTerm
GO:0005634	1	GO:0005634	0.84	8471	8471	nucleus	nucleus
GO:0005856	2	GO:0005856	0.95	1308	1308	cytoskeleton	cytoskeleton
GO:0043231	1	GO:0005634	0.615	1078	1078	intracellular membrane-bounded organelle	nucleus
GO:0005730	3	GO:0005730	0.99	878	878	nucleolus	nucleolus
GO:0098978	4	GO:0098978	0.992	854	854	glutamatergic synapse	glutamatergic synapse
GO:0043005	5	GO:0043005	0.97	632	632	neuron projection	neuron projection
GO:0030425	5	GO:0043005	0.835	622	622	dendrite	neuron projection
GO:0030424	5	GO:0043005	0.851	538	538	axon	neuron projection
GO:0005764	6	GO:0005764	0.993	517	517	lysosome	lysosome
GO:0005743	7	GO:0005743	0.993	487	487	mitochondrial inner membrane	mitochondrial inner membrane
GO:0014069	4	GO:0098978	0.572	415	415	postsynaptic density	glutamatergic synapse
GO:0005874	2	GO:0005856	0.695	380	380	microtubule	cytoskeleton
GO:0005769	8	GO:0005769	0.997	288	288	early endosome	early endosome
GO:0005777	9	GO:0005777	0.997	203	203	peroxisome	peroxisome
GO:0015630	2	GO:0005856	0.855	194	194	microtubule cytoskeleton	cytoskeleton
GO:0005759	7	GO:0005743	0.577	177	177	mitochondrial matrix	mitochondrial inner membrane
GO:0005770	8	GO:0005769	0.695	173	173	late endosome	early endosome
GO:0005765	6	GO:0005764	0.869	162	162	lysosomal membrane	lysosome
GO:0055037	8	GO:0005769	0.676	143	143	recycling endosome	early endosome
GO:0072686	2	GO:0005856	0.609	115	115	mitotic spindle	cytoskeleton
GO:0031966	7	GO:0005743	0.95	107	107	mitochondrial membrane	mitochondrial inner membrane
GO:0010008	8	GO:0005769	0.705	98	98	endosome membrane	early endosome
GO:0019005	10	GO:0019005	0.999	92	92	SCF ubiquitin ligase complex	SCF ubiquitin ligase complex
GO:0005819	2	GO:0005856	0.684	91	91	spindle	cytoskeleton
GO:0097060	4	GO:0098978	0.599	61	61	synaptic membrane	glutamatergic synapse
GO:0080008	10	GO:0019005	0.816	39	39	Cul4-RING E3 ubiquitin ligase complex	SCF ubiquitin ligase complex
GO:0032040	11	GO:0032040	1	38	38	small-subunit processome	small-subunit processome
GO:0030687	11	GO:0032040	0.843	24	24	preribosome, large subunit precursor	small-subunit processome
GO:0032279	4	GO:0098978	0.575	23	23	asymmetric synapse	glutamatergic synapse
GO:0005740	7	GO:0005743	0.938	18	18	mitochondrial envelope	mitochondrial inner membrane
GO:0031461	10	GO:0019005	0.914	17	17	cullin-RING ubiquitin ligase complex	SCF ubiquitin ligase complex
GO:0030686	11	GO:0032040	0.855	11	11	90S preribosome	small-subunit processome
GO:0030132	8	GO:0005769	0.326	10	10	clathrin coat of coated pit	early endosome
GO:0005915	4	GO:0098978	0.348	7	7	zonula adherens	glutamatergic synapse
GO:0031981	3	GO:0005730	0.683	4	4	nuclear lumen	nucleolus
GO:0043232	2	GO:0005856	0.778	0	0	intracellular non-membrane-bounded organelle	cytoskeleton
GO:0098852	6	GO:0005764	0.826	0	0	lytic vacuole membrane	lysosome
GO:0099513	2	GO:0005856	0.737	0	0	polymeric cytoskeletal fiber	cytoskeleton
GO:0070013	3	GO:0005730	0.663	0	0	intracellular organelle lumen	nucleolus

## Sheet: Module_2_BP
Term	Overlap	P.value	Adjusted.P.value	Old.P.value	Old.Adjusted.P.value	Odds.Ratio	Combined.Score	Genes
SRP-dependent cotranslational protein targeting to membrane (GO:0006614)	81/90	4.90072e-77	9.72111e-74	0	0	102.784	18060.2	RPL4;RPL5;SRP19;RPL30;RPL3;RPL32;RPL31;RPL34;RPLP1;RPLP0;ZFAND2B;RPL10A;RPL8;SRP14;RPL9;RPL6;RPL7;RPS15;RPS4X;RPL7A;RPS14;RPS17;RPS16;RPL18A;RPS19;RPS18;RPL36;RPL35;RPLP2;RPL38;RPL37;RPS11;RPL39;RPS10;RPS13;RPS12;RPS9;RPL21;RPS7;RPS8;RPL23;RPS5;RPL22;RPS6;RPL13A;RPSA;RPL37A;RPL24;RPL27;RPL26;RPL29;RPL28;UBA52;RPL10;RPL12;RPL11;RPL36A;RPS15A;RPL14;RPS3;RPL13;RPL15;RPS2;RPL18;RPS27A;RPL17;RPL19;RPL…
translation (GO:0006412)	124/214	4.90965e-77	9.72111e-74	0	0	16.097	2828.38	RPL4;RPL5;RPL30;RPL3;RPL32;RPL31;RPL34;RPL8;RPL10A;RPL9;RPL6;RPL7;RPS15;EEF1B2;RPS14;RPS17;RPS16;RPL18A;RPS19;RPS18;RPL36;RPL35;RPL38;RPL37;RPS11;RPL39;RPS10;RPS13;RPS12;RPS9;RPL21;RPS7;RPS8;RPL23;RPS5;RPL22;RPS6;MRPS18B;MRPS18A;RPSA;GTPBP1;MRPS18C;EEF1A1;PPA1;EEF1A2;RPL24;RPL27;RPL26;RPL29;RPL28;UBA52;MRPL18;MRPL13;MRPL10;MRPL11;RPL41;MRPL27;MRPL28;MRPL23;AIMP1;RPS26;AIMP2;RPS25;RPS28;RPS27;RPS2…
protein targeting to ER (GO:0045047)	86/103	1.38424e-75	1.8272e-72	0	0	57.9295	9985.24	RPL4;RPL5;SRP19;RPL30;RPL3;RPL32;RPL31;RPL34;RPLP1;RPLP0;ZFAND2B;RPL10A;RPL8;SRP14;RPL9;RPL6;RPL7;RPS15;RPS4X;RPS14;RPL7A;RPS17;RPS16;RPL18A;RPS19;RPS18;SEC61G;RPL36;RPL35;RPLP2;RPL38;RPL37;RPS11;GET3;RPL39;RPS10;RPS13;RPS12;RPS9;RPL21;RPS7;RPS8;RPL23;RPS5;RPL22;RPS6;RPL13A;RPSA;RPL37A;RPL24;RPL27;RPL26;RPL29;RPL28;UBA52;RPL10;RPL12;RPL11;RPL36A;RPS15A;RPL14;RPS3;RPL13;RPL15;RPS2;RPL18;RPS27A;RPL…
cotranslational protein targeting to membrane (GO:0006613)	82/94	2.08198e-75	2.06116e-72	0	0	78.0757	13425.9	RPL4;RPL5;SRP19;RPL30;RPL3;RPL32;RPL31;RPL34;RPLP1;RPLP0;RPL10A;RPL8;SRP14;RPL9;RPL6;RPL7;RPS15;RPS4X;RPL7A;RPS14;RPS17;RPS16;RPL18A;RPS19;RPS18;RPL36;RPL35;RPLP2;RPL38;RPL37;RPS11;RPL39;RPS10;SIL1;RPS13;RPS12;RPS9;RPL21;RPS7;RPS8;RPL23;RPS5;SSR2;RPL22;RPS6;RPL13A;RPSA;RPL37A;RPL24;RPL27;RPL26;RPL29;RPL28;UBA52;RPL10;RPL12;RPL11;RPL36A;RPS15A;RPL14;RPS3;RPL13;RPL15;RPS2;RPL18;RPS27A;RPL17;RPL19;R…
peptide biosynthetic process (GO:0043043)	106/162	8.27971e-74	6.55753e-71	0	0	21.9034	3685.85	RPL4;RPL5;RPL30;RPL3;RPL32;RPL31;RPL34;RPL10A;RPL8;RPL9;RPL6;RPL7;RPS15;RPS14;RPS17;RPS16;RPL18A;RPS19;RPS18;RPL36;RPL35;RPL38;RPL37;RPS11;RPL39;RPS10;RPS13;RPS12;RPS9;RPL21;RPS7;RPS8;RPL23;RPS5;RPL22;RPS6;MRPS18B;MRPS18A;RPSA;MRPS18C;EEF1A1;EEF1A2;RPL24;RPL27;RPL26;RPL29;RPL28;MRPL18;MRPL13;MRPL10;MRPL11;GGT7;RPL41;MRPL27;MRPL28;MRPL23;RPS26;RPS25;RPS28;RPS27;RPS29;RPL27A;RPS20;RPS21;RPS24;RPS23…
cytoplasmic translation (GO:0002181)	77/93	3.51142e-67	2.31753e-64	0	0	54.8032	8385.83	RPL4;RPL5;RPL30;RPL3;RPL32;RPL31;RPL34;RPLP1;RPLP0;RPL10A;RPL8;RPL9;RPL6;RPL7;RPS15;RPS4X;RPL7A;RPS14;RPS17;RPS16;RPL18A;RPS19;RPS18;RPL36;RPL35;RPL38;RPL37;RPS11;RPL39;RPS10;RPS13;RPS12;RPS9;RPL21;RPS7;RPS8;RPL23;RPS5;RPL22;RPS6;RPL13A;RPSA;RPL37A;RPL24;RPL27;RPL26;RPL29;RPL28;UBA52;RPL10;RPL12;RPL11;RPL36A;RPS15A;RPL14;RPS3;RPL13;RPL15;RPS2;RPL18;RPS27A;RPL17;RPL19;RWDD1;RPL41;RPL35A;RPL23A;RPS…
nuclear-transcribed mRNA catabolic process, nonsense-mediated decay (GO:0000184)	81/113	1.5162e-61	8.57739e-59	0	0	28.8717	4043.24	RPL4;RPL5;RPL30;RPL3;RPL32;RPL31;RPL34;RPLP1;RPLP0;RPL10A;RPL8;RPL9;RPL6;RPL7;RPS15;RPS4X;RPS14;RPL7A;RPS17;RPS16;RPL18A;RPS19;PPP2R1A;RPS18;RPL36;RPL35;RPLP2;RPL38;RPL37;RPS11;RPL39;RPS10;RPS13;RPS12;RPS9;RPL21;RPS7;RPS8;RPL23;RPS5;RPL22;RPS6;RPL13A;RPSA;RPL37A;RPL24;RPL27;RPL26;PABPC1;RPL29;RPL28;UBA52;RPL10;RPL12;RPL11;RPL36A;RPS15A;RPL14;RPS3;RPL13;RPL15;RPS2;RPL18;RPS27A;RPL17;RPL19;RPL41;PY…
cellular macromolecule biosynthetic process (GO:0034645)	132/314	1.19016e-59	5.89129e-57	0	0	8.47431	1149.78	RPL4;RPL5;RPL30;RPL3;RPL32;RPL31;RPL34;RPL8;RPL10A;RPL9;RPL6;RPL7;RPS15;EEF1B2;RPS14;RPS17;RPS16;KAT5;RPL18A;RPS19;RPS18;RPL36;RPL35;KAT7;RPL38;RPL37;RPS11;RPL39;RPS10;RPS13;RPS12;RPS9;RPL21;RPS7;RPS8;RPL23;RPS5;RPL22;RPS6;MRPS18B;MRPS18A;RPSA;GTPBP1;MRPS18C;EEF1A1;EEF1A2;RPL24;RPL27;RPL26;RPL29;RPL28;RHNO1;MRPL18;MRPL13;MRPL10;MRPL11;APOE;RPL41;MRPL27;MRPL28;MRPL23;RPS26;RPS25;RPS28;RPS27;RPS29;…
cellular protein metabolic process (GO:0044267)	145/417	5.07945e-53	2.23496e-50	0	0	6.25019	752.597	RPL4;RPL5;RPL30;RPL3;RPL32;RPL31;RPL34;RPL8;RPL10A;RPL9;RPL6;RPL7;RPS15;RPS14;RPS17;LGALS1;RPS16;RPL18A;RPS19;RPS18;RPL36;RPL35;RPL38;RPL37;RPS11;RPL39;RPS10;RPS13;CHGB;RPS12;RPS9;RPL21;RPS7;IGFBP4;RPS8;RPL23;RPS5;RPL22;IGFBP2;RPS6;MRPS18B;SHISA5;MRPS18A;RPSA;PDIA6;MRPS18C;EEF1A1;CDC34;FDX1;EEF1A2;FDX2;RPL24;RPL27;RPL26;RPL29;RPL28;UBA52;SCG2;RPN2;MRPL18;RPN1;MRPL13;CSF2RA;MRPL10;MRPL11;HSP90B1;P…
nuclear-transcribed mRNA catabolic process (GO:0000956)	89/171	4.59586e-50	1.81996e-47	0	0	12.4079	1409.59	RPL4;RPL5;RPL30;RPL3;RPL32;RPL31;RPL34;RPLP1;RPLP0;RPL10A;RPL8;RPL9;RPL6;RPL7;RPS15;RPS4X;RPS14;RPL7A;RPS17;RPS16;RPL18A;RPS19;PPP2R1A;RPS18;RPL36;RPL35;RPLP2;RPL38;RPL37;RPS11;PELO;RPL39;RPS10;RPS13;RPS12;RPS9;RPL21;RPS7;RPS8;RPL23;RPS5;RPL22;RPS6;RPL13A;RPSA;MRTO4;RPL37A;RPL24;RPL27;RPL26;PABPC1;RPL29;RPL28;UBA52;RPL10;RPL12;RPL11;RPL36A;EXOSC7;EXOSC5;EXOSC4;RPS15A;POLR2D;RPL14;RPS3;RPL13;RPL15…
gene expression (GO:0010467)	128/356	1.0973e-48	3.95027e-46	0	0	6.52614	720.689	RPL4;RPL5;RPL30;RPL3;RPL32;RPL31;RPL34;RPL8;RPL10A;RPL9;RPL6;RPL7;RPS15;RPS14;RPS17;RPS16;RPL18A;RPS19;RPS18;RPL36;RPL35;RPL38;RPL37;RPS11;RPL39;RPS10;RPS13;RPS12;RPS9;RPL21;RPS7;RPS8;RPL23;RPS5;RPL22;RPS6;MRPS18B;MRPS18A;RPSA;MRPS18C;EEF1A1;DNAJB11;EEF1A2;SRSF2;RPL24;RPL27;RPL26;RPL29;RPL28;SRSF9;MRPL18;MRPL13;MRPL10;MRPL11;NUP85;SYMPK;TSPAN5;RPL41;ALYREF;MRPL27;MRPL28;MRPL23;RPS26;RPS25;RPS28;R…
translational elongation (GO:0006414)	62/104	5.7447e-40	1.89575e-37	0	0	16.6313	1502.72	MRPS17;MRPS15;MRPS16;MRPS11;MRPS12;MRPL36;MRPL34;MRPL33;EEF1B2;MRPL41;MRPL42;MRPL2;MRPL40;RACK1;CHCHD1;MRPS28;TSFM;MRPS26;MRPS24;MRPS25;MRPS23;MRPS18B;MRPL49;MRPS18A;MRPS21;MRPS7;GTPBP1;MRPL46;MRPL43;MRPS18C;EEF1A1;EEF1G;MRPL52;MRPL53;MRPL51;EEF1D;EEF1A2;AURKAIP1;DAP3;MRPS35;MRPS36;MRPL18;MRPS33;MRPL19;MRPS34;MRPL17;MRPL14;MRPL58;MRPL12;MRPL13;MRPL10;MRPL54;MRPL11;MRPL55;MRPL20;GADD45GIP1;MRPL27;…
rRNA metabolic process (GO:0016072)	77/162	9.01751e-40	2.74687e-37	0	0	10.277	923.946	RPL4;TRIR;POP5;RPL5;RPL30;RPL3;RPL32;RPL31;DDX47;RPL34;RPLP1;RRP1;RPLP0;RPL10A;RPL8;RPL9;RPL6;RPL7;RPS15;FBL;RPS14;RPL7A;RPS17;RPS16;RPL18A;RPS19;RPL36;RPL35;RPLP2;RPL38;RPL37;RPL39;RPS9;RPL21;RPS7;IMP3;PIH1D1;RPL23;RPL22;RPS6;RPL13A;MRTO4;C1D;RPL37A;SBDS;RPL24;RPL27;RPL26;RPL29;RPL28;UBA52;RPL10;RPL12;RPL11;RPL36A;NOLC1;RPF1;RRP7A;EXOSC7;EXOSC5;EXOSC4;RPL14;RPL13;RPL15;RPS2;RPL18;RPL17;RPL19;RPL…
rRNA processing (GO:0006364)	79/173	3.52287e-39	9.9647e-37	0	0	9.54158	844.826	RPL4;POP5;RPL5;RPL30;RPL3;RPL32;RPL31;DDX47;RPL34;RPLP1;RRP1;RPLP0;RPL10A;RPL8;RPL9;RPL6;RPL7;RPS15;FBL;RPS14;RPL7A;RPS17;RPS16;RPL18A;RPS19;RPL36;RPL35;RPLP2;RPL38;RPL37;RPL39;RPS9;RPL21;RPS7;IMP3;PIH1D1;RPL23;RPL22;RPS6;RPL13A;NSA2;MRTO4;C1D;RPL37A;NHP2;SBDS;RPL24;RPL27;RPL26;RPL29;RPL28;UBA52;RPL10;RPL12;RPL11;TSR3;RPL36A;NOLC1;RPF1;RRP7A;EXOSC7;EXOSC5;EXOSC4;RPL14;RPL13;RPL15;RPS2;RPL18;RPL17…
ribosome biogenesis (GO:0042254)	82/192	6.08793e-38	1.60721e-35	0	0	8.47175	725.961	RPL4;POP5;RPL5;RPL30;RPL3;RPL32;RPL31;DDX47;RPL34;RPLP1;RRP1;RPLP0;MRPL36;RPL10A;RPL8;RPL9;RPL6;RPL7;RPS15;FBL;RPS14;RPL7A;RPS17;RPS16;RPL18A;RPS19;RPL36;RPL35;RPLP2;RPL38;RPL37;RPL39;RPS9;RPL21;RPS7;IMP3;PIH1D1;RPL23;RPL22;RPS6;GTF3A;RPL13A;MRTO4;C1D;RPL37A;SBDS;RPL24;RPL27;RPL26;RPL29;RPL28;UBA52;RPL10;NIP7;RPL12;RPL11;RPL36A;NOLC1;MALSU1;RPF2;RPF1;RRP7A;EXOSC7;EXOSC5;EXOSC4;RPL14;RPL13;RPL15;R…
mitochondrial translational elongation (GO:0070125)	54/89	1.55596e-35	3.85101e-33	0	0	17.3037	1386.86	MRPS17;MRPS15;MRPS16;MRPS11;MRPS12;MRPL36;MRPL34;MRPL33;MRPL41;MRPL42;MRPL2;MRPL40;CHCHD1;MRPS28;TSFM;MRPS26;MRPS24;MRPS25;MRPS23;MRPL49;MRPS18B;MRPS18A;MRPS21;MRPS7;MRPL46;MRPL43;MRPS18C;MRPL52;MRPL53;MRPL51;AURKAIP1;DAP3;MRPS35;MRPS36;MRPL18;MRPS33;MRPL19;MRPS34;MRPL17;MRPL14;MRPL58;MRPL12;MRPL13;MRPL10;MRPL54;MRPL11;MRPL55;MRPL20;GADD45GIP1;MRPL27;MRPL28;MRPL23;MRPL22;MRPL30
ncRNA processing (GO:0034470)	80/201	2.17373e-34	5.0635e-32	0	0	7.49985	581.324	RPL4;POP5;RPL5;RPL30;POP7;RPL3;RPL32;RPL31;DDX47;RPL34;RPLP1;RRP1;RPLP0;RPL8;RPL10A;RPL9;RPL6;RPL7;FARS2;RPS15;RPS14;FBL;RPL7A;RPS17;RPS16;RPL18A;RPS19;RPL36;RPL35;RPLP2;RPL38;RPL37;RPL39;RPS9;RPL21;RPS7;IMP3;PIH1D1;RPL23;METTL3;RPL22;RPS6;RPL13A;MRTO4;C1D;RPL37A;RPP21;SBDS;RPL24;RPL27;RPL26;RPL29;RPL28;UBA52;RPL10;RPL12;RPL11;RPL36A;NOLC1;RPF1;RRP7A;EXOSC7;EXOSC5;EXOSC4;RPL14;RPL13;RPL15;RPS2;RP…
mitochondrial translational termination (GO:0070126)	53/89	2.62414e-34	5.7731e-32	0	0	16.5004	1275.87	MRPS17;MRPS15;MRPS16;MRPS11;MRPS12;MRPL36;MRPL34;MRPL33;MRPL41;MRPL42;MRPL2;MRPL40;CHCHD1;MRPS28;MRPS26;MRPS24;MRPS25;MRPS23;MRPL49;MRPS18B;MRPS18A;MRPS21;MRPS7;MRPL46;MRPL43;MRPS18C;MRPL52;MRPL53;MRPL51;AURKAIP1;DAP3;MRPS35;MRPS36;MRPL18;MRPS33;MRPL19;MRPS34;MRPL17;MRPL14;MRPL58;MRPL12;MRPL13;MRPL10;MRPL54;MRPL11;MRPL55;MRPL20;GADD45GIP1;MRPL27;MRPL28;MRPL23;MRPL22;MRPL30
translational termination (GO:0006415)	54/96	3.82789e-33	7.97813e-31	0	0	14.4142	1075.92	MRPS17;MRPS15;MRPS16;MRPS11;MRPS12;MRPL36;MRPL34;MRPL33;MRPL41;MRPL42;TRMT112;MRPL2;MRPL40;CHCHD1;MRPS28;MRPS26;MRPS24;MRPS25;MRPS23;MRPL49;MRPS18B;MRPS18A;MRPS21;MRPS7;MRPL46;MRPL43;MRPS18C;MRPL52;MRPL53;MRPL51;AURKAIP1;DAP3;MRPS35;MRPS36;MRPL18;MRPS33;MRPL19;MRPS34;MRPL17;MRPL14;MRPL58;MRPL12;MRPL13;MRPL10;MRPL54;MRPL11;MRPL55;MRPL20;GADD45GIP1;MRPL27;MRPL28;MRPL23;MRPL22;MRPL30
mitochondrial translation (GO:0032543)	55/105	1.46828e-31	2.9072e-29	0	0	12.3343	875.688	MRPS17;MRPS15;MRPS16;MRPS11;MRPS12;MRPL36;MRPL34;MRPL33;MRPL41;MRPL42;MRPL2;MRPL40;CHCHD1;MRPS28;TSFM;MRPS26;MRPS24;MRPS25;MRPS23;MRPS18B;MRPL49;MRPS18A;MRPS21;MRPS7;MRPL46;MRPL43;MRPS18C;MRPL52;MRPL53;MRPL51;AURKAIP1;DAP3;MRPS35;MRPS36;MRPL18;MRPS33;MRPL19;MRPS34;MRPL17;MRPL14;MRPL58;MRPL12;MRPL13;MRPL10;MRPL54;MRPL11;MRPL55;MRPL20;GADD45GIP1;NDUFA7;MRPL27;MRPL28;MRPL23;MRPL22;MRPL30
aerobic electron transport chain (GO:0019646)	44/70	3.88598e-30	7.32784e-28	0	0	18.8734	1278.11	NDUFB9;COX7B;NDUFA13;NDUFB8;NDUFB7;NDUFA11;NDUFB10;NDUFA12;NDUFB11;NDUFB5;COX4I1;NDUFB4;NDUFB3;NDUFB2;UQCR11;UQCR10;COX6A1;COX5B;COX6A2;COX7C;UQCRH;CYC1;NDUFV3;NDUFV2;COX8A;NDUFA8;NDUFA7;NDUFA6;NDUFA5;NDUFA3;NDUFA2;NDUFA1;NDUFC1;SDHC;COX6B1;COX7A2L;NDUFS8;NDUFS7;NDUFS6;UQCRQ;NDUFS5;NDUFS4;NDUFS3;CYCS
mitochondrial ATP synthesis coupled electron transport (GO:0042775)	44/71	9.39802e-30	1.69164e-27	0	0	18.1734	1214.65	NDUFB9;COX7B;NDUFA13;NDUFB8;NDUFB7;NDUFA11;NDUFB10;NDUFA12;NDUFB11;NDUFB5;COX4I1;NDUFB4;NDUFB3;NDUFB2;UQCR11;UQCR10;COX6A1;COX5B;COX6A2;COX7C;UQCRH;CYC1;NDUFV3;NDUFV2;COX8A;NDUFA8;NDUFA7;NDUFA6;NDUFA5;NDUFA3;NDUFA2;NDUFA1;NDUFC1;SDHC;COX6B1;COX7A2L;NDUFS8;NDUFS7;NDUFS6;UQCRQ;NDUFS5;NDUFS4;NDUFS3;CYCS
mitochondrial respiratory chain complex assembly (GO:0033108)	43/90	6.93106e-23	1.19335e-20	0	0	10.1854	519.693	COX19;NDUFB9;NDUFA13;NDUFB8;NDUFB7;NDUFA11;DMAC1;NDUFB10;NDUFA12;DMAC2;NDUFB11;NDUFB5;NDUFB4;COX17;NDUFB3;NDUFB2;COX14;NDUFV3;COA8;NDUFV2;COA3;NDUFA8;NDUFA7;SURF1;NDUFA6;NDUFA5;PET100;UQCC2;NDUFA3;NDUFA2;NDUFA1;NDUFC1;NDUFAF8;NDUFS8;NDUFS7;NDUFS6;NDUFS5;NDUFS4;NDUFAF5;NDUFS3;NDUFAF2;NDUFAF3;SMIM20
mitochondrial respiratory chain complex I assembly (GO:0032981)	34/58	3.65554e-22	5.79037e-20	0	0	15.7053	775.221	NDUFB9;NDUFA13;NDUFB8;NDUFB7;NDUFA11;DMAC1;NDUFB10;NDUFA12;DMAC2;NDUFB11;NDUFB5;NDUFB4;NDUFB3;NDUFB2;NDUFV3;NDUFV2;NDUFA8;NDUFA7;NDUFA6;NDUFA5;NDUFA3;NDUFA2;NDUFA1;NDUFC1;NDUFAF8;NDUFS8;NDUFS7;NDUFS6;NDUFS5;NDUFS4;NDUFAF5;NDUFS3;NDUFAF2;NDUFAF3
NADH dehydrogenase complex assembly (GO:0010257)	34/58	3.65554e-22	5.79037e-20	0	0	15.7053	775.221	NDUFB9;NDUFA13;NDUFB8;NDUFB7;NDUFA11;DMAC1;NDUFB10;NDUFA12;DMAC2;NDUFB11;NDUFB5;NDUFB4;NDUFB3;NDUFB2;NDUFV3;NDUFV2;NDUFA8;NDUFA7;NDUFA6;NDUFA5;NDUFA3;NDUFA2;NDUFA1;NDUFC1;NDUFAF8;NDUFS8;NDUFS7;NDUFS6;NDUFS5;NDUFS4;NDUFAF5;NDUFS3;NDUFAF2;NDUFAF3
mitochondrial electron transport, NADH to ubiquinone (GO:0006120)	28/39	4.40763e-22	6.71316e-20	0	0	28.1368	1383.59	NDUFB9;NDUFA13;NDUFB8;NDUFB7;NDUFA11;NDUFB10;NDUFA12;NDUFB11;NDUFB5;NDUFB4;NDUFB3;NDUFB2;NDUFV3;NDUFV2;NDUFA8;NDUFA7;NDUFA6;NDUFA5;NDUFA3;NDUFA2;NDUFA1;NDUFC1;NDUFS8;NDUFS7;NDUFS6;NDUFS5;NDUFS4;NDUFS3
RNA splicing, via transesterification reactions with bulged adenosine as nucleophile (GO:0000377)	61/251	2.09433e-14	3.07169e-12	0	0	3.58558	112.935	WDR83;DDX41;PQBP1;EFTUD2;UBL5;RBM4;SNRPD2;SNRPD1;DHX16;TXNL4A;SNRPN;BUD31;METTL3;SYF2;FRG1;SRSF2;SNRNP27;PPIH;SNRPA1;PABPC1;GEMIN7;SNRNP25;SNRPF;DNAJC8;SNRPC;SNRPA;SNRPB;SRSF9;SF3B2;ZMAT2;PUF60;U2AF2;PCBP1;POLR2C;ZMAT5;POLR2D;POLR2E;SYMPK;POLR2F;RALY;POLR2H;POLR2I;POLR2J;POLR2K;POLR2L;ZRSR2;HSPA8;SF3A2;ALYREF;CDC5L;CWC15;LSM5;LSM4;LSM3;LSM7;SNW1;PHF5A;LSM6;CWF19L1;RNPS1;HNRNPC
mRNA splicing, via spliceosome (GO:0000398)	63/274	1.20857e-13	1.70927e-11	0	0	3.33483	99.1917	WDR83;DDX41;PQBP1;EFTUD2;UBL5;RBM4;SNRPD2;SNRPD1;DHX16;TXNL4A;SNRPN;BUD31;METTL3;SCNM1;SYF2;CLNS1A;FRG1;SRSF2;SNRNP27;PPIH;SNRPA1;PABPC1;GEMIN7;SNRNP25;SNRPF;DNAJC8;SNRPC;SNRPA;SNRPB;SRSF9;SF3B2;ZMAT2;PUF60;U2AF2;PCBP1;POLR2C;ZMAT5;POLR2D;POLR2E;SYMPK;POLR2F;RALY;POLR2H;POLR2I;POLR2J;POLR2K;POLR2L;ZRSR2;HSPA8;SF3A2;ALYREF;CDC5L;CWC15;LSM5;LSM4;LSM3;LSM7;SNW1;PHF5A;LSM6;CWF19L1;RNPS1;HNRNPC
mRNA processing (GO:0006397)	65/300	9.05313e-13	1.23622e-10	0	0	3.08902	85.6601	WDR83;DDX41;PQBP1;EFTUD2;UBL5;RBM4;SNRPD2;SNRPD1;DHX16;TXNL4A;SNRPN;BUD31;METTL3;SYF2;FRG1;SRSF2;SNRNP27;PPIH;SNRPA1;PABPC1;GEMIN7;SNRNP25;SNRPF;DNAJC8;AURKAIP1;SNRPC;SNRPA;SNRPB;SRSF9;SF3B2;POLDIP3;ZMAT2;PUF60;U2AF2;PCBP1;POLR2C;ZMAT5;POLR2D;POLR2E;SYMPK;POLR2F;RALY;POLR2H;POLR2I;POLR2J;POLR2K;POLR2L;ZRSR2;HSPA8;SF3A2;ALYREF;CDC5L;CWC15;LSM5;GTF2H4;LSM4;GTF2H5;LSM3;LSM7;SNW1;PHF5A;LSM6;CWF19L1;R…
ribosome assembly (GO:0042255)	23/50	1.92035e-12	2.53487e-10	0	0	9.3796	253.048	RPL5;RPL3;RPL10;MRPS11;RPS5;RPLP0;RPL11;MPV17L2;RPSA;RPL23A;MRPS7;RPF2;RPL6;MRPL22;RPS15;RRP7A;RPS14;MRPL20;RPS28;RPS27;RPS19;SBDS;RPL24
ribosomal large subunit biogenesis (GO:0042273)	24/57	6.74029e-12	8.61018e-10	0	0	8.01008	206.043	RPL5;RPL3;RPL10;NOP16;NIP7;RPLP0;RPL11;GTF3A;RPL35A;RPL23A;MALSU1;RPL10A;RPF2;RPL6;RPL7;RPF1;RPL7A;MRPL20;NSA2;MRTO4;NHP2;RPL14;RPL24;RPL26
ribonucleoprotein complex assembly (GO:0022618)	38/136	2.01119e-11	2.48884e-09	0	0	4.29169	105.703	RPL5;RPL3;RPL10;MRPS11;RPLP0;RPL11;CELF6;RPF2;NOL3;RPL6;RPS15;RRP7A;RPS14;MRPL20;RPS19;SNRPD2;PUF60;SNRPD1;POLR2D;EIF4H;RPL38;TXNL4A;ZRSR2;SF3A2;RPS5;RPSA;RPL23A;MRPS7;LSM4;RPS28;RPS27;CLNS1A;RPL24;GEMIN7;SNRPF;SNRPC;SNRPB;SRSF9
proteasome-mediated ubiquitin-dependent protein catabolic process (GO:0043161)	63/321	1.70947e-10	2.05137e-08	0	0	2.72024	61.1773	GSK3A;UBXN1;FAF2;ZFAND2B;AUP1;ARRB2;PSMD8;ANKRD9;PSMD9;UCHL1;KAT5;PSMD4;PSMD3;KCTD2;RAD23A;RNF126;CDC34;SELENOS;PSMA2;DDIT3;KCTD13;PSME1;PSME2;ANAPC5;KCTD17;UBA52;ANAPC15;PSMD11;RNF34;DMAC2;PSMD13;UBE2J2;FBXO44;RNF5;PSMB10;ANAPC11;HSP90B1;PSMB6;PSMB7;PSMB4;PSMB5;SHARPIN;PSMB2;UBB;PSMB3;PSMB1;UBC;RPS27A;HSPA5;RHBDD2;WFS1;SGTA;SYVN1;TMUB1;FBXL15;UBE2G2;UBE2A;TMUB2;NSFL1C;UBXN11;GID8;STUB1;RNF187
ribonucleoprotein complex biogenesis (GO:0022613)	23/60	1.81791e-10	2.11732e-08	0	0	6.84083	153.427	RPL5;RPS7;NOP16;NIP7;RPS6;RPL11;GTF3A;RPL35A;MRPL36;MALSU1;RPF2;RPL7;RPS15;RPS25;RPS17;RPS28;RPS16;RPS19;MRTO4;RPL14;RPL38;RPL26;RPS24
transcription-coupled nucleotide-excision repair (GO:0006283)	25/73	4.9686e-10	5.62161e-08	0	0	5.73513	122.862	GPS1;XPA;COPS7A;UBB;POLR2C;POLD2;POLR2D;UBC;POLR2E;POLR2F;POLR2H;POLR2I;RPS27A;POLR2J;POLR2K;HMGN1;POLR2L;RFC2;XRCC1;GTF2H4;GTF2H5;COPS6;ERCC1;COPS8;UBA52
ribosomal small subunit biogenesis (GO:0042274)	18/40	7.75163e-10	8.52679e-08	0	0	8.98428	188.472	RPS7;MRPS11;RPS5;TSR3;RPS6;RPSA;MRPS7;RPS15;RRP7A;RPS14;RPS25;RPS17;RPS28;RPS16;LSM6;RPS27;RPS19;RPS24
regulation of mRNA catabolic process (GO:0061013)	33/122	1.04735e-09	1.12095e-07	0	0	4.09347	84.6408	PSMD11;ANP32A;PSMD13;PSMB10;PSMD8;EXOSC7;PSMB6;PSMD9;PSMB7;EXOSC5;PSMB4;EXOSC4;PSMB5;PSMD4;UBB;PSMB2;PSMB3;PSMD3;UBC;PSMB1;RPS27A;HSPA8;SAMD4B;GTPBP1;PSMA2;CSDC2;APEX1;SERBP1;PSME1;PSME2;PABPC1;VIM;UBA52
proteasomal protein catabolic process (GO:0010498)	44/205	5.79523e-09	6.03924e-07	0	0	3.02537	57.38	GSK3A;UBXN1;PSMD11;RNF34;PSMD13;ZFAND2B;ARRB2;FBXO44;RNF5;PSMB10;PSMD8;ANKRD9;PSMB6;PSMD9;PSMB7;UCHL1;PSMB4;PSMB5;SHARPIN;KAT5;PSMD4;PSMB2;PSMB3;PSMD3;PSMB1;UBXN6;SYVN1;KCTD2;RAD23A;UBE2A;RNF41;NSFL1C;RNF126;CDC34;UBXN11;PSMA2;DDIT3;GID8;KCTD13;PSME1;PSME2;STUB1;KCTD17;RNF187
regulation of cellular amine metabolic process (GO:0033238)	19/51	1.21054e-08	1.22917e-06	0	0	6.5202	118.861	PSMD11;PSMD13;OAZ1;OAZ2;PSMB10;PSMD8;PSMB6;PSMD9;PSMB7;PSMB4;PSMB5;PSMD4;PSMB2;PSMA2;PSMB3;PSMD3;PSMB1;PSME1;PSME2
mitochondrial gene expression (GO:0140053)	17/42	1.64284e-08	1.62642e-06	0	0	7.46124	133.737	MRPS17;MRPS28;MRPS15;NDUFA7;MRPS16;MRPS24;MRPS11;MRPS12;MRPS34;MRPS18B;MRPS18A;MRPS21;MRPL12;MRPL23;MRPS7;MRPL2;MRPL51
nucleotide-excision repair (GO:0006289)	28/105	2.65699e-08	2.52824e-06	0	0	4.00505	69.862	GPS1;XPA;COPS7A;POLB;UBB;POLR2C;UBC;POLD2;POLR2D;POLR2E;POLR2F;POLR2H;POLR2I;RPS27A;POLR2J;POLR2K;HMGN1;POLR2L;RFC2;XRCC1;RAD23A;COMMD1;GTF2H4;GTF2H5;COPS6;ERCC1;COPS8;UBA52
regulation of transcription from RNA polymerase II promoter in response to hypoxia (GO:0061418)	23/75	2.68147e-08	2.52824e-06	0	0	4.86352	84.7922	PSMD11;PSMD13;HIGD1A;PSMB10;PSMD8;PSMB6;PSMD9;PSMB7;PSMB4;PSMB5;PSMD4;PSMB2;UBB;PSMA2;PSMB3;PSMD3;PSMB1;UBC;PSME1;PSME2;ELOB;RPS27A;UBA52
pre-replicative complex assembly (GO:0036388)	21/64	2.84862e-08	2.61227e-06	0	0	5.36622	93.2319	PSMD11;PSMD13;PSMB10;PSMD8;PSMB6;PSMD9;PSMB7;PSMB4;PSMB5;PSMD4;PSMB2;UBB;PSMA2;PSMB3;PSMD3;PSMB1;UBC;PSME1;PSME2;RPS27A;UBA52
regulation of transcription from RNA polymerase II promoter in response to stress (GO:0043618)	25/87	2.90252e-08	2.61227e-06	0	0	4.4367	76.9994	PSMD11;PSMD13;HIGD1A;PSMB10;PSMD8;PSMB6;PSMD9;PSMB7;PSMB4;PSMB5;PSMD4;PSMB2;UBB;PSMB3;PSMD3;PSMB1;UBC;ELOB;RPS27A;PSMA2;DDIT3;PSME1;PSME2;UBA52;ATF4
regulation of cellular amino acid metabolic process (GO:0006521)	19/54	3.58821e-08	3.15762e-06	0	0	5.96034	102.178	PSMD11;PSMD13;OAZ1;OAZ2;PSMB10;PSMD8;PSMB6;PSMD9;PSMB7;PSMB4;PSMB5;PSMD4;PSMB2;PSMA2;PSMB3;PSMD3;PSMB1;PSME1;PSME2
negative regulation of G2/M transition of mitotic cell cycle (GO:0010972)	21/66	5.23661e-08	4.50804e-06	0	0	5.12716	85.9569	PSMD11;PSMD13;VPS4A;PSMB10;PSMD8;PSMB6;PSMD9;PSMB7;PSMB4;PSMB5;PSMD4;PSMB2;PSMA2;PSMB3;ZFYVE19;PSMD3;PSMB1;PSME1;NABP2;PSME2;CDK5RAP3
anaphase-promoting complex-dependent catabolic process (GO:0031145)	24/84	6.17162e-08	5.19992e-06	0	0	4.39904	73.0272	ANAPC15;PSMD11;PSMD13;PSMB10;ANAPC11;PSMD8;PSMB6;PSMD9;PSMB7;PSMB4;PSMB5;PSMD4;PSMB2;UBB;PSMA2;PSMB3;PSMD3;PSMB1;UBC;PSME1;PSME2;ANAPC5;RPS27A;UBA52
mitochondrial transport (GO:0006839)	19/56	7.04408e-08	5.81137e-06	0	0	5.63755	92.8419	BCAP31;DNAJC19;TIMM8B;FIS1;TOMM40;AIP;TOMM34;TIMM13;TIMM22;TIMM10;TOMM22;TIMM10B;TIMM17A;PPIF;TOMM7;TIMM17B;SLC25A4;TMEM14C;BCL2L1
protein targeting (GO:0006605)	30/125	1.138e-07	9.19687e-06	0	0	3.47884	55.6226	TOMM40;ZFAND2B;RPL11;TIMM13;TIMM10;SRP14;ZDHHC1;GABARAP;TOMM22;ZDHHC4;SEC61G;TIMM17A;TIMM17B;CACNG3;DNAJC19;BCAP31;TIMM8B;FIS1;AIP;TOMM34;VPS37D;TIMM22;PEX1;TIMM10B;SPCS2;CDC37;GIPC1;TOMM7;SRPRB;NACAD
regulation of mRNA stability (GO:0043488)	33/146	1.25159e-07	9.91256e-06	0	0	3.21982	51.1748	PSMD11;ANP32A;PSMD13;PSMB10;PSMD8;EXOSC7;PSMB6;PSMD9;PSMB7;EXOSC5;PSMB4;EXOSC4;PSMB5;PSMD4;UBB;PSMB2;PSMB3;PSMD3;UBC;PSMB1;RPS27A;HSPA8;METTL3;SAMD4B;PSMA2;CSDC2;APEX1;SERBP1;PSME1;PSME2;PABPC1;VIM;UBA52
mitochondrion organization (GO:0007005)	37/175	1.38392e-07	1.07457e-05	0	0	2.95921	46.7353	STOML2;TOMM40;MTFP1;TIMM13;COX7A2;PARK7;PHB;TIMM10;HIGD1A;TOMM22;CHCHD2;TIMM17A;MYH14;TIMM17B;DNAJC19;ESRRA;BCAP31;TIMM8B;FIS1;MTX1;AIP;TOMM34;SIRT4;CHCHD10;TIMM22;ATAD3A;HIGD2A;SIRT3;TIMM10B;COX7A2L;HAX1;FMC1;TOMM7;CYCS;BAX;SLC25A4;BCL2L1
establishment of protein localization to mitochondrion (GO:0072655)	17/48	1.67942e-07	1.27894e-05	0	0	6.01515	93.8343	BCAP31;DNAJC19;TIMM8B;FIS1;TOMM40;PAM16;TIMM13;AIP;TOMM34;TIMM22;TIMM10;TOMM22;TIMM10B;TIMM17A;TOMM7;TIMM17B;ROMO1
mitochondrial electron transport, cytochrome c to oxygen (GO:0006123)	10/17	1.95464e-07	1.4334e-05	0	0	15.6247	241.368	COX8A;COX7B;COX7A2L;COX4I1;CYCS;COX5B;COX6A1;COX6A2;COX7C;COX6B1
ribosomal small subunit assembly (GO:0000028)	10/17	1.95464e-07	1.4334e-05	0	0	15.6247	241.368	RPS15;RRP7A;RPS14;RPS28;RPS27;RPS19;MRPS11;RPS5;RPSA;MRPS7
regulation of primary metabolic process (GO:0080090)	30/130	2.85804e-07	2.04444e-05	0	0	3.30399	49.7844	PSMD11;MVK;SMARCD3;PSMD13;GPS2;OAZ1;OAZ2;PSMB10;TM7SF2;PSMD8;PSMB6;PSMD9;PSMB7;PSMB4;PSMB5;PSMD4;PSMB2;PSMB3;OPA3;PSMD3;PMVK;PSAP;PSMB1;APOE;FDFT1;FDPS;EDF1;PSMA2;PSME1;PSME2
protein targeting to mitochondrion (GO:0006626)	18/55	2.89113e-07	2.04444e-05	0	0	5.33763	80.3657	BCAP31;DNAJC19;TIMM8B;FIS1;NDUFA13;TOMM40;PAM16;AIP;TOMM34;TIMM13;TIMM22;TIMM10;TOMM22;TIMM10B;TIMM17A;TOMM7;TIMM17B;ROMO1
negative regulation of DNA recombination at telomere (GO:0048239)	11/22	4.30115e-07	2.93664e-05	0	0	10.9414	160.393	ACD;DAXX;POLR2C;POLR2D;POLR2E;POLR2F;POLR2H;POLR2I;POLR2J;POLR2K;POLR2L
regulation of DNA recombination at telomere (GO:0072695)	11/22	4.30115e-07	2.93664e-05	0	0	10.9414	160.393	ACD;DAXX;POLR2C;POLR2D;POLR2E;POLR2F;POLR2H;POLR2I;POLR2J;POLR2K;POLR2L
negative regulation of cell cycle G2/M phase transition (GO:1902750)	18/57	5.29005e-07	3.55061e-05	0	0	5.06335	73.1769	PSMD11;PSMD13;PSMB10;PSMD8;PSMB6;PSMD9;PSMB7;PSMB4;PSMB5;PSMD4;PSMB2;PSMA2;PSMB3;PSMD3;PSMB1;PSME1;PSME2;ATF5
positive regulation of viral process (GO:0048524)	19/63	5.73804e-07	3.78711e-05	0	0	4.73885	68.1019	VPS4A;RAD23A;TBC1D20;VAPB;POLR2C;POLR2D;POLR2E;POLR2F;NELFB;PPIH;TMEM39A;PABPC1;POLR2H;POLR2I;PPIA;POLR2J;POLR2K;NELFE;POLR2L
interleukin-1-mediated signaling pathway (GO:0070498)	24/94	6.16812e-07	4.00422e-05	0	0	3.76854	53.8852	PSMD11;PSMD13;PSMB10;PSMD8;PSMB6;PSMD9;PSMB7;PSMB4;PSMB5;PSMD4;PSMB2;UBB;PSMA2;PSMB3;PSMD3;PSMB1;UBC;PSME1;PSME2;UBE2V1;RPS27A;SQSTM1;UBA52;MAPK3
regulation of cellular ketone metabolic process (GO:0010565)	19/64	7.52071e-07	4.80355e-05	0	0	4.63329	65.3314	PSMD11;PSMD13;OAZ1;OAZ2;PSMB10;PSMD8;PSMB6;PSMD9;PSMB7;PSMB4;PSMB5;PSMD4;PSMB2;PSMA2;PSMB3;PSMD3;PSMB1;PSME1;PSME2
cellular respiration (GO:0045333)	15/42	7.88892e-07	4.95875e-05	0	0	6.08781	85.5498	SURF1;NDUFA5;MDH2;SDHC;ETFB;UQCR10;MTLN;SDHB;UQCRH;SIRT3;NDUFS8;NDUFS7;BLOC1S1;NDUFS4;CYCS
cellular response to hypoxia (GO:0071456)	29/131	1.1243e-06	6.95662e-05	0	0	3.129	42.8621	ACAA2;PSMD11;PSMD13;HIGD1A;PSMB10;PSMD8;PSMB6;PSMD9;PSMB7;PSMB4;PSMB5;PSMD4;UBB;PSMB2;FAM162A;PSMB3;PSMD3;UBC;PSMB1;ELOB;RPS27A;MT3;PSMA2;PSME1;PSME2;HYOU1;STUB1;P4HB;UBA52
protein transport (GO:0015031)	59/369	1.24754e-06	7.60037e-05	0	0	2.10889	28.669	RAB3B;RAB3A;SYS1;CLU;SCAMP5;SCAMP4;GOLGA4;CHMP1A;ARL6IP5;TMED3;TOM1;ATP6V1E1;SIL1;TMED4;ATP6V0B;TMED9;AMN;ATP6V1G2;ATP6AP1;STX8;SCAMP3;COPZ1;PDIA4;OLFM2;CTTN;RAB34;CANX;ERP29;MYH9;ATP6V0C;SCG2;STX1A;ARF5;VAMP2;NAPA;RAMP2;NECAB3;RAMP3;LMAN2L;LRP1;RAB1B;HSP90B1;GGA1;SNX1;GGA3;RAB24;APOE;ATP6V0E2;SNX8;ATP6V1F;CTSA;ACD;MCOLN1;RAB11B;IFT22;CHMP2A;UNC119;IFT27;RAMP1
Wnt signaling pathway, planar cell polarity pathway (GO:0060071)	22/85	1.39807e-06	8.38841e-05	0	0	3.83518	51.6998	PSMD11;PSMD13;WNT7A;ARRB2;PSMB10;PSMD8;PSMB6;PSMD9;PSMB7;PSMB4;PARD6A;PSMB5;PSMD4;PSMB2;PSMA2;PSMB3;PSMD3;PSMB1;PSME1;AP2S1;PSME2;PFN1
DNA-dependent DNA replication (GO:0006261)	28/129	2.58303e-06	0.000150437	0	0	3.04934	39.2345	PSMD11;PSMD13;PSMB10;PSMD8;POLB;PSMB6;PSMD9;PSMB7;PSMB4;PSMB5;PSMD4;UBB;PSMB2;PSMB3;PSMD3;UBC;POLD2;PSMB1;RPS27A;RFC2;HMGA1;WRNIP1;CDC34;PSMA2;POLE3;PSME1;PSME2;UBA52
aerobic respiration (GO:0009060)	10/21	2.58759e-06	0.000150437	0	0	9.94081	127.886	SURF1;NDUFS8;NDUFS7;MDH2;BLOC1S1;SDHC;UQCR10;SDHB;UQCRH;SIRT3
regulation of establishment of planar polarity (GO:0090175)	22/88	2.62125e-06	0.000150437	0	0	3.66025	47.041	PSMD11;PSMD13;WNT7A;ARRB2;PSMB10;PSMD8;PSMB6;PSMD9;PSMB7;PSMB4;PARD6A;PSMB5;PSMD4;PSMB2;PSMA2;PSMB3;PSMD3;PSMB1;PSME1;AP2S1;PSME2;PFN1
positive regulation of viral transcription (GO:0050434)	11/26	3.4314e-06	0.000194119	0	0	8.02196	100.937	POLR2C;POLR2D;POLR2E;POLR2F;NELFB;POLR2H;POLR2I;POLR2J;POLR2K;NELFE;POLR2L
positive regulation of signal transduction by p53 class mediator (GO:1901798)	10/22	4.3855e-06	0.0002446	0	0	9.11191	112.415	EIF5A;HEXIM1;RPS15;RPS7;UBB;RPL23;RPS20;RPL37;EEF1E1;CDK5RAP3
RNA splicing (GO:0008380)	23/98	4.99394e-06	0.000274667	0	0	3.36779	41.1116	ZRSR2;SF3B2;SNRPN;DDX47;WDR83;NOL3;LSM4;LSM6;SCNM1;SNRPD2;PPP2R1A;SNRPD1;ZMAT5;SRSF2;DHX16;RNPS1;RP9;SNRPA1;SNRNP25;SNRPF;HNRNPC;TXNL4A;SNRPB
ubiquitin-dependent protein catabolic process (GO:0006511)	55/354	6.81109e-06	0.000369478	0	0	2.03448	24.2041	GSK3A;UBXN1;PPP1R11;ZFAND2B;ARRB2;PSMD8;ANKRD9;PSMD9;UCHL1;KAT5;PSMD4;PSMD3;UBL7;VPS37D;KCTD2;RAD23A;RNF126;CDC34;PSMA2;DDIT3;KCTD13;PSME1;PSME2;ANAPC5;KCTD17;SQSTM1;VPS28;ANAPC15;PSMD11;RNF34;PSMD13;VPS4A;NEDD8;RNF5;PSMB10;ANAPC11;PSMB6;PSMB7;PSMB4;PSMB5;SHARPIN;PSMB2;PSMB3;PSMB1;XBP1;ZRANB1;SYVN1;UBE2G2;UBE2A;NSFL1C;UBXN11;GID8;UBAP1;STUB1;RNF187
regulation of hematopoietic progenitor cell differentiation (GO:1901532)	19/75	1.00892e-05	0.000539909	0	0	3.72094	42.8058	PSMD11;PSMD13;METTL3;PSMB10;PSMD8;PSMB6;PSMD9;PSMB7;PSMB4;PSMB5;PSMD4;PSMB2;PSMA2;PSMB3;PSMD3;PSMB1;PSME1;PSME2;PDCD2
endoplasmic reticulum to Golgi vesicle-mediated transport (GO:0006888)	34/185	1.16877e-05	0.000617112	0	0	2.47887	28.1524	DCTN6;NAPA;DCTN5;LMAN2L;DCTN2;KDELR1;PEF1;RAB1B;CTSZ;USE1;LMAN2;TRAPPC12;TMED3;SPTAN1;DYNC1I1;VTI1B;TMED4;BCAP31;TMED9;TRAPPC2L;TRAPPC1;TRAPPC4;DYNLL1;DYNLL2;COPZ1;YIF1A;TBC1D20;TMEM115;VAPB;RANGRF;HYOU1;CNIH2;ERGIC3;COPE
aggrephagy (GO:0035973)	11/29	1.21218e-05	0.000631612	0	0	6.68387	75.6647	UBB;UBC;PARK7;UBE2V1;VIM;RPS27A;DYNLL1;DYNLL2;SQSTM1;UBA52;DYNC1I1
protein insertion into mitochondrial inner membrane (GO:0045039)	7/12	1.60625e-05	0.000826074	0	0	15.2865	168.748	TIMM10B;TIMM8B;NDUFA13;TIMM13;ROMO1;TIMM22;TIMM10
regulation of hematopoietic stem cell differentiation (GO:1902036)	18/71	1.69625e-05	0.000861173	0	0	3.72301	40.8954	PSMD11;PSMD13;METTL3;PSMB10;PSMD8;PSMB6;PSMD9;PSMB7;PSMB4;PSMB5;PSMD4;PSMB2;PSMA2;PSMB3;PSMD3;PSMB1;PSME1;PSME2
negative regulation of response to endoplasmic reticulum stress (GO:1903573)	10/25	1.75203e-05	0.000867253	0	0	7.28833	79.8229	XBP1;UBXN1;SELENOS;WFS1;RACK1;SYVN1;TMBIM6;PARK7;CLU;BCL2L1
ribosomal large subunit assembly (GO:0000027)	10/25	1.75203e-05	0.000867253	0	0	7.28833	79.8229	RPL5;MRPL20;RPL3;RPL10;RPL11;RPLP0;RPL24;RPL23A;RPF2;RPL6
selective autophagy (GO:0061912)	16/59	1.98868e-05	0.000972244	0	0	4.07629	44.1277	TEX264;AUP1;PARK7;DYNLL1;DYNLL2;MAP1LC3B;UBB;DDRGK1;UBC;UFC1;UBE2V1;VIM;RPS27A;SQSTM1;UBA52;DYNC1I1
protein-DNA complex assembly (GO:0065004)	28/143	2.03113e-05	0.000980887	0	0	2.67606	28.913	H2AX;PSMD11;PSMD13;XPA;PSMB10;PSMD8;PSMB6;PSMD9;PSMB7;PSMB4;PSMB5;PSMD4;UBB;PSMB2;PSMB3;PSMD3;UBC;PSMB1;RPS27A;DAXX;CENPV;GTF2H4;GTF2H5;NAP1L4;PSMA2;PSME1;PSME2;UBA52
antigen processing and presentation of exogenous peptide antigen via MHC class I, TAP-dependent (GO:0002479)	18/73	2.55224e-05	0.0012177	0	0	3.58723	37.9384	PSMD11;PSMD13;PSMB10;PSMD8;PSMB6;PSMD9;PSMB7;PSMB4;PSMB5;PSMD4;PSMB2;PSMA2;PSMB3;PSMD3;PSMB1;PSME1;PSME2;CALR
maturation of LSU-rRNA (GO:0000470)	10/26	2.63259e-05	0.00124108	0	0	6.83244	72.0478	RPL7A;NSA2;NIFK;RPL7L1;NHP2;RPL35;RPF2;RPL10A;RPF1;RPL7
tumor necrosis factor-mediated signaling pathway (GO:0033209)	24/116	3.03948e-05	0.00141555	0	0	2.86391	29.7882	EIF5A;PLVAP;PSMD11;PSMD13;ILK;ACTN4;COMMD7;PSMB10;TXNDC17;PSMD8;PSMB6;PSMD9;PSMB7;PSMB4;PSMB5;PSMD4;PSMB2;PSMA2;PSMB3;PSMD3;PSMB1;PSME1;CDIP1;PSME2
protein insertion into ER membrane (GO:0045048)	12/37	3.08138e-05	0.00141555	0	0	5.251	54.5451	CYB5A;WDR83OS;EMC1;SEC61G;SGTA;EMC10;UBE2J2;GET3;EMD;EMC9;STX1A;VAMP2
NIK/NF-kappaB signaling (GO:0038061)	18/74	3.10993e-05	0.00141555	0	0	3.52298	36.5626	PSMD11;PSMD13;PSMB10;PSMD8;PSMB6;PSMD9;PSMB7;PSMB4;PSMB5;PSMD4;PSMB2;PSMA2;PSMB3;PSMD3;PSMB1;PSME1;PSME2;COPS8
regulation of cell cycle phase transition (GO:1901987)	21/95	3.34371e-05	0.00150467	0	0	3.11292	32.0813	ANAPC15;PSMD11;PSMD13;PSMB10;ANAPC11;PSMD8;PSMB6;PSMD9;PSMB7;PSMB4;PSMB5;PSMD4;PSMB2;PSMA2;PSMB3;PSMD3;SIX3;PSMB1;PSME1;PSME2;ANAPC5
7-methylguanosine mRNA capping (GO:0006370)	11/32	3.56804e-05	0.00156994	0	0	5.72809	58.6608	POLR2C;POLR2D;POLR2E;POLR2F;POLR2H;POLR2I;POLR2J;GTF2H4;POLR2K;GTF2H5;POLR2L
7-methylguanosine RNA capping (GO:0009452)	11/32	3.56804e-05	0.00156994	0	0	5.72809	58.6608	POLR2C;POLR2D;POLR2E;POLR2F;POLR2H;POLR2I;POLR2J;GTF2H4;POLR2K;GTF2H5;POLR2L
response to endoplasmic reticulum stress (GO:0034976)	23/110	3.70372e-05	0.00161173	0	0	2.90136	29.6043	EIF2B5;BCAP31;JUN;HSPA5;WFS1;SYVN1;SELENOK;RNF5;PDIA4;HSP90B1;SCAMP5;SELENOS;TMEM259;DDRGK1;GORASP2;DDIT3;UFC1;BAX;HYOU1;P4HB;CDK5RAP3;UBXN6;ATF4
proteasomal ubiquitin-independent protein catabolic process (GO:0010499)	9/22	3.76351e-05	0.00161995	0	0	7.56496	77.0686	PSMB6;PSMB7;PSMB4;PSMB5;PSMB2;PSMA2;PSMB3;PSMB1;PSMB10
SCF-dependent proteasomal ubiquitin-dependent protein catabolic process (GO:0031146)	20/89	3.97516e-05	0.00169265	0	0	3.17848	32.2071	PSMD11;DMAC2;PSMD13;FBXL15;FBXO44;PSMB10;PSMD8;PSMB6;PSMD9;PSMB7;PSMB4;PSMB5;PSMD4;PSMB2;PSMA2;PSMB3;PSMD3;PSMB1;PSME1;PSME2
negative regulation of ubiquitin-dependent protein catabolic process (GO:2000059)	12/38	4.16035e-05	0.00175266	0	0	5.04877	50.9286	RPL5;PDCL3;UBXN1;BAG5;RPS7;DDRGK1;RPL23;GIPC1;RPL11;SGTA;EIF3H;PARK7
nucleotide-excision repair, DNA damage recognition (GO:0000715)	9/23	5.72179e-05	0.00238508	0	0	7.02422	68.6171	COPS6;UBB;GPS1;UBC;XPA;COPS7A;COPS8;RPS27A;UBA52
negative regulation of intrinsic apoptotic signaling pathway (GO:2001243)	16/64	5.91794e-05	0.00244115	0	0	3.65068	35.5391	CDKN2D;NDUFA13;XBP1;SYVN1;PARK7;NOL3;CLU;DNAJA1;BAG5;SELENOS;NDUFS3;PPIF;TMBIM6;HYOU1;PPIA;BCL2L1
regulation of apoptotic process (GO:0042981)	93/742	6.5469e-05	0.00263164	0	0	1.59122	15.3297	MTCH1;PRR7;PDCD5;SRA1;CIB1;FAIM2;PARK7;HMGB1;CLU;CX3CL1;ING4;MYDGF;LGALS1;FAM162A;SMPD1;ARHGDIA;CFL1;RACK1;ARL6IP5;PIM3;IFT57;CTSD;PHLDA3;BOK;CTSB;PSENEN;DAXX;ACTN2;ACTN1;ANXA5;RPS6;SIGMAR1;NME2;ACTN4;MIF;ATAD3A;NME1;CLIP3;HAX1;AKT1S1;PPIF;TMEM219;TMBIM6;NSMF;NAA38;ATF5;EEF1E1;UBA52;SQSTM1;PPIA;ATF4;SLC27A4;BEX2;RPL10;ANP32A;MAGED1;GSTP1;PHB;NOL3;HIGD1A;HSP90B1;PTPA;PRDX2;TFPT;PRDX5;MIEN1;UBB;DDR…
negative regulation of mitotic cell cycle phase transition (GO:1901991)	20/92	6.55736e-05	0.00263164	0	0	3.04554	29.3357	CDKN2D;PSMD11;PSMD13;PSMB10;PSMD8;PSMB6;PSMD9;PSMB7;PSMB4;PSMB5;PSMD4;PSMB2;PSMA2;PSMB3;CDK4;PSMD3;PSMB1;PSME1;CDK2AP2;PSME2
antigen processing and presentation of exogenous peptide antigen via MHC class I (GO:0042590)	18/78	6.57911e-05	0.00263164	0	0	3.28739	31.6544	PSMD11;PSMD13;PSMB10;PSMD8;PSMB6;PSMD9;PSMB7;PSMB4;PSMB5;PSMD4;PSMB2;PSMA2;PSMB3;PSMD3;PSMB1;PSME1;PSME2;CALR
positive regulation of intrinsic apoptotic signaling pathway (GO:2001244)	12/40	7.32735e-05	0.00290163	0	0	4.68763	44.6324	BCAP31;EIF5A;FIS1;UBB;RPS7;DDIT3;RACK1;RPS3;BAX;BOK;SOD1;BCL2L1
protein insertion into mitochondrial membrane (GO:0051204)	9/24	8.47273e-05	0.00332198	0	0	6.55558	61.4656	TIMM8B;TIMM10B;NDUFA13;TIMM13;BAX;TIMM22;ROMO1;TIMM10;TOMM22
RNA processing (GO:0006396)	31/179	8.98395e-05	0.00348789	0	0	2.30215	21.4503	TSEN34;SF3B2;DDX47;TSEN2;NOL3;RBM4;SNRPD2;PPP2R1A;SNRPD1;U2AF2;ZMAT5;DHX16;ZRSR2;SNRPN;SF3A2;METTL3;LSM5;LSM4;LSM3;LSM6;SCNM1;SRSF2;RNPS1;RP9;SNRPA1;SNRNP25;SNRPF;HNRNPC;AURKAIP1;SNRPB;SRSF9
cellular response to interleukin-1 (GO:0071347)	28/155	9.12222e-05	0.00350718	0	0	2.4216	22.5263	PSMD11;PSMD13;USP10;CX3CL1;PSMB10;PSMD8;PSMB6;PSMD9;PSMB7;PSMB4;PSMB5;PSMD4;UBB;PSMB2;PSMB3;PSMD3;UBC;PSMB1;RPS27A;CCL17;MAPK3;CCL25;PSMA2;PSME1;PSME2;UBE2V1;SQSTM1;UBA52
regulation of viral transcription (GO:0046782)	12/41	9.57135e-05	0.00364448	0	0	4.52574	41.8819	HEXIM1;POLR2C;POLR2D;POLR2E;POLR2F;NELFB;POLR2H;POLR2I;POLR2J;POLR2K;NELFE;POLR2L
post-translational protein modification (GO:0043687)	50/345	0.000109223	0.00411925	0	0	1.86928	17.0518	RAB3A;PRKCSH;DDA1;PSMD8;ANKRD9;PSMD9;LGALS1;PSMD4;PSMD3;ELOB;CHGB;WSB2;IGFBP4;SHISA5;COMMD1;PDIA6;VGF;PSMA2;PSME1;PSME2;MFGE8;SCG2;PSMD11;PSMD13;GPS1;RAB1B;COPS7A;NEDD8;FBXO44;PSMB10;HSP90B1;CST3;PSMB6;PSMB7;PSMB4;PSMB5;PSMB2;PSMB3;PENK;PSMB1;APOE;WFS1;FBXL15;BTBD6;RAB11B;COPS6;NUCB1;P4HB;COPS8;UBE2M
mitochondrial cytochrome c oxidase assembly (GO:0033617)	8/20	0.00012441	0.00464778	0	0	7.28083	65.4687	COA3;COX19;SURF1;PET100;COX17;COX14;COA8;SMIM20
macroautophagy (GO:0016236)	23/120	0.000150936	0.00558603	0	0	2.60082	22.8838	GABARAPL2;GABARAPL1;TOMM40;VPS4A;VPS37D;SNF8;DYNLL1;DYNLL2;GABARAP;TOMM22;MAP1LC3B;MAP1LC3A;HGS;CSNK2B;CHMP2A;TOMM7;CHMP6;SQSTM1;VPS25;VPS28;UBXN6;VTI1B;TOMM6
regulation of stem cell differentiation (GO:2000736)	19/91	0.000174122	0.00638449	0	0	2.89152	25.0283	PSMD11;PSMD13;METTL3;PSMB10;PSMD8;PSMB6;PSMD9;PSMB7;PSMB4;PSMB5;PSMD4;PSMB2;PSMA2;PSMB3;PSMD3;PSMB1;PSME1;PSME2;NELFB
intracellular protein transmembrane transport (GO:0065002)	12/44	0.000201637	0.00732552	0	0	4.10078	34.8937	RTN2;DNAJC19;TOMM40;HSPA5;SEC61G;ZFAND2B;PAM16;TIMM17A;TIMM17B;ROMO1;PEX1;PEX14
mitochondrial electron transport, ubiquinol to cytochrome c (GO:0006122)	6/12	0.000209054	0.00745815	0	0	10.9118	92.4548	UQCRQ;CYCS;UQCR11;CYC1;UQCR10;UQCRH
negative regulation of amyloid fibril formation (GO:1905907)	6/12	0.000209054	0.00745815	0	0	10.9118	92.4548	PFDN1;APOE;PFDN4;CLU;PFDN5;PFDN6
regulated exocytosis (GO:0045055)	30/180	0.000233043	0.00818812	0	0	2.19661	18.3731	RAB3A;TEX264;PDGFA;CLU;CPLX1;CRHBP;CYB5R1;PSAP;HABP4;SDF4;VTI1B;CHID1;SYT5;SYT3;ACTN2;ACTN1;ANXA5;IGF2;VEGFB;ACTN4;SYNGR3;RAB11B;SOD1;CDK5;PCYOX1L;MYH9;MAGED2;ALDOA;STX1A;VAMP2
positive regulation of intrinsic apoptotic signaling pathway by p53 class mediator (GO:1902255)	4/5	0.000233651	0.00818812	0	0	43.6071	364.629	EIF5A;RPS7;UBB;RPL26
protein modification by small protein removal (GO:0070646)	41/276	0.000258459	0.00897803	0	0	1.92	15.8607	INO80E;PSMD11;PSMD13;USP10;GPS1;COPS7A;NEDD8;ARRB2;PSMB10;PSMD8;BABAM1;PSMB6;POLB;PSMD9;PSMB7;TFPT;UCHL1;PSMB4;PSMB5;PSMD4;PSMB2;UBB;PSMB3;PSMD3;PSMB1;UBC;SUDS3;RPS27A;ZRANB1;MCRS1;TAF10;RAD23A;COPS6;PSMA2;HGS;PSME1;PSME2;EIF3F;COPS8;UBA52;OTUB1
regulation of endoplasmic reticulum stress-induced intrinsic apoptotic signaling pathway (GO:1902235)	8/22	0.000271065	0.00933407	0	0	6.24003	51.2503	XBP1;SELENOS;DDIT3;SYVN1;TMBIM6;PARK7;BCL2L1;BOK

## Sheet: Module_2_CC
Term	Overlap	P.value	Adjusted.P.value	Old.P.value	Old.Adjusted.P.value	Odds.Ratio	Combined.Score	Genes
mitochondrial inner membrane (GO:0005743)	131/328	4.89684e-56	1.90977e-53	0	0	7.75832	988.07	NDUFA13;NDUFA11;NDUFA12;TAMM41;MPV17L2;MICOS13;COX6A1;CLU;CHCHD6;CHCHD1;TMEM14C;ENDOG;PAM16;MRPS18B;MRPS18A;SDHC;SDHB;MRPS18C;COX6B1;COX7A2L;DNAJC30;AURKAIP1;DAP3;NDUFB10;NDUFB11;MRPL18;MRPL19;MRPL17;MRPL14;PHB;MRPL12;HIGD1A;MRPL13;MTLN;MRPL10;UQCRH;MRPL11;MRPL20;CYC1;NDUFV3;NDUFV2;PRODH;DNAJC19;UQCC2;MRPL27;MRPL28;COQ9;MRPL23;MRPL22;MRPL30;TIMM10B;UQCRQ;NDUFAF5;NDUFAF2;NDUFAF3;CYCS;MRPS17;COX7B;…
organelle inner membrane (GO:0019866)	130/346	5.55963e-52	1.08413e-49	0	0	7.00999	827.311	NDUFA13;NDUFA11;NDUFA12;TAMM41;MPV17L2;MICOS13;COX6A1;CLU;TM7SF2;CHCHD6;CHCHD1;TMEM14C;ENDOG;MRPS18B;MRPS18A;SDHC;SDHB;MRPS18C;COX6B1;COX7A2L;DNAJC30;AURKAIP1;DAP3;NDUFB10;NDUFB11;MRPL18;MRPL19;MRPL17;MRPL14;PHB;MRPL12;HIGD1A;MRPL13;MTLN;MRPL10;UQCRH;MRPL11;MRPL20;CYC1;NDUFV3;NDUFV2;PRODH;DNAJC19;UQCC2;MRPL27;MRPL28;COQ9;MRPL23;MRPL22;MRPL30;TIMM10B;UQCRQ;NDUFAF5;NDUFAF2;NDUFAF3;CYCS;MRPS17;COX7B…
large ribosomal subunit (GO:0015934)	52/59	1.19006e-48	1.54708e-46	0	0	83.3393	9196.5	RPL4;RPL5;RPL30;RPL3;RPL32;RPL31;RPL34;RPLP1;RPLP0;RPL10A;RPL8;RPL9;RPL6;RPL7;RPL7A;RPL18A;RPL36AL;RPL36;RPL35;RPLP2;RPL38;RPL37;RPL39;RPL21;RPL23;RPL22;RPL13A;RPL7L1;RPL37A;RPL24;RPL27;RPL26;RPL29;RPL28;RPL10;RPL12;RPL11;RPL36A;MRPL17;MRPL10;MRPL11;RPL14;RPL13;RPL15;RPL18;RPL17;RPL19;RPL41;RPL35A;RPL23A;MRPL22;RPL27A
mitochondrial membrane (GO:0031966)	146/469	1.27662e-46	1.2447e-44	0	0	5.28807	558.816	NDUFA13;NDUFA11;NDUFA12;TAMM41;CISD1;MPV17L2;MICOS13;COX6A1;CLU;TOMM22;CHCHD6;CHCHD1;TMEM14C;ENDOG;MRPS18B;TOMM34;MRPS18A;SDHC;SDHB;MRPS18C;COX6B1;COX7A2L;DNAJC30;AURKAIP1;UBA52;DAP3;ABCB6;MTARC2;NDUFB10;NDUFB11;MRPL18;MRPL19;MRPL17;ABCB8;MRPL14;PHB;MRPL12;HIGD1A;MRPL13;MTLN;MRPL10;UQCRH;MRPL11;MRPL20;UBB;UBC;CYC1;NDUFV3;NDUFV2;PRODH;DNAJC19;UQCC2;MRPL27;MRPL28;COQ9;MRPL23;MRPL22;MRPL30;TIMM10B;U…
cytosolic large ribosomal subunit (GO:0022625)	48/55	1.57211e-44	1.22624e-42	0	0	76.7405	7740.15	RPL4;RPL5;RPL30;RPL3;RPL32;RPL10;RPL31;RPL34;RPLP1;RPL12;RPLP0;RPL11;RPL36A;RPL10A;RPL8;RPL9;RPL6;RPL7;RPL7A;RPL18A;RPL36AL;RPL36;RPL14;RPL35;RPLP2;RPL13;RPL38;RPL37;RPL15;RPL18;RPL39;RPL17;RPL19;RPL41;RPL21;RPL23;RPL22;RPL13A;RPL35A;RPL23A;RPL7L1;RPL27A;RPL37A;RPL24;RPL27;RPL26;RPL29;RPL28
ribosome (GO:0005840)	46/62	1.48171e-36	9.63111e-35	0	0	32.12	2649.89	RPL30;RPL32;RPL31;MRPS12;RPL11;RPL36A;RPL10A;RPL8;RPL9;MRPL13;RPL6;RPS4X;RPL7A;RPS17;RPL18A;RPS19;RPS18;RPL36;RPS3;RPL38;RPL15;RPS11;RPL18;RPL39;RPS10;RPS13;RPL19;RPS9;RPL41;RPS7;RPL23;RPS5;RPL13A;SRP68;MRPS7;RPS26;RPS25;RPS28;RPS27;RPS29;APEX1;RPL24;EIF3H;RPL27;RPS21;RPS23
small ribosomal subunit (GO:0015935)	34/45	8.57237e-28	4.77603e-26	0	0	34.2904	2137.11	MRPS16;MRPS11;RPS15;RPS4X;RPS14;RPS17;RPS15A;RPS16;RPS19;RPS18;RACK1;RPS3;RPS2;RPS11;RPS27A;RPS10;RPS13;RPS12;RPS9;RPS7;RPS8;RPS5;RPS6;RPSA;RPS26;RPS25;RPS28;RPS27;RPS29;RPS20;RPS21;UBA52;RPS24;RPS23
cytosolic small ribosomal subunit (GO:0022627)	32/40	1.22091e-27	5.95193e-26	0	0	44.3293	2747.1	MRPS11;RPS15;RPS4X;RPS14;RPS17;RPS15A;RPS16;RPS19;RPS18;RPS3;RPS2;RPS11;RPS27A;RPS10;RPS13;RPS12;RPS9;RPS7;RPS8;RPS5;RPS6;RPSA;RPS26;RPS25;RPS28;RPS27;RPS29;RPS20;RPS21;UBA52;RPS24;RPS23
mitochondrial respiratory chain complex I (GO:0005747)	28/42	1.08261e-20	4.22217e-19	0	0	22.1039	1016.17	NDUFB9;NDUFA13;NDUFB8;NDUFB7;NDUFA11;NDUFB10;NDUFA12;NDUFB11;NDUFB5;NDUFB4;NDUFB3;NDUFB2;NDUFV3;NDUFV2;NDUFA8;NDUFA7;NDUFA6;NDUFA5;NDUFA3;NDUFA2;NDUFA1;NDUFC1;NDUFS8;NDUFS7;NDUFS6;NDUFS5;NDUFS4;NDUFS3
respiratory chain complex I (GO:0045271)	28/42	1.08261e-20	4.22217e-19	0	0	22.1039	1016.17	NDUFB9;NDUFA13;NDUFB8;NDUFB7;NDUFA11;NDUFB10;NDUFA12;NDUFB11;NDUFB5;NDUFB4;NDUFB3;NDUFB2;NDUFV3;NDUFV2;NDUFA8;NDUFA7;NDUFA6;NDUFA5;NDUFA3;NDUFA2;NDUFA1;NDUFC1;NDUFS8;NDUFS7;NDUFS6;NDUFS5;NDUFS4;NDUFS3
polysomal ribosome (GO:0042788)	23/30	1.89728e-19	6.72674e-18	0	0	36.218	1561.31	RPL30;RPL41;RPL32;RPL31;RPL11;RPL36A;RPL10A;RPL8;RPL6;RPS26;RPL7A;RPS28;RPL18A;RPS29;RPL36;EIF3H;RPL24;RPL38;RPL18;RPL39;RPS21;RPL19;RPS23
focal adhesion (GO:0005925)	83/387	1.14167e-15	3.71044e-14	0	0	3.07167	105.685	RPL4;RPL5;RPL30;RPL3;RPL31;CD81;RPLP1;RPLP0;ILK;RPL8;RPL10A;ALKBH6;RPL9;RPL6;RPL7;RPS15;RPS4X;RPL7A;RPS14;RPS17;RPS16;MPRIP;RPS19;RPS18;CFL1;BSG;RPLP2;RPL38;RPS11;RPS10;RPS13;RPS9;MAP2K2;RPS7;RPS8;ACTN2;RPL23;RPS5;ACTN1;RPL22;ANXA5;NME2;RPL13A;ACTN4;MMP14;CTTN;RPL37A;CDC42EP1;CDH13;MYH9;RPL27;ITGB1BP1;PABPC1;PFN1;PPIB;ATP6V0C;PPIA;LRP1;RPL12;ARL2;NEXN;CD99L2;THY1;HSP90B1;SLC9A3R2;RPS3;RPS2;RPL18;…
cell-substrate junction (GO:0030055)	83/394	3.37912e-15	1.01373e-13	0	0	3.00137	100.009	RPL4;RPL5;RPL30;RPL3;RPL31;CD81;RPLP1;RPLP0;ILK;RPL8;RPL10A;ALKBH6;RPL9;RPL6;RPL7;RPS15;RPS4X;RPL7A;RPS14;RPS17;RPS16;MPRIP;RPS19;RPS18;CFL1;BSG;RPLP2;RPL38;RPS11;RPS10;RPS13;RPS9;MAP2K2;RPS7;RPS8;ACTN2;RPL23;RPS5;ACTN1;RPL22;ANXA5;NME2;RPL13A;ACTN4;MMP14;CTTN;RPL37A;CDC42EP1;CDH13;MYH9;RPL27;ITGB1BP1;PABPC1;PFN1;PPIB;ATP6V0C;PPIA;LRP1;RPL12;ARL2;NEXN;CD99L2;THY1;HSP90B1;SLC9A3R2;RPS3;RPS2;RPL18;…
spliceosomal tri-snRNP complex (GO:0097526)	15/32	1.01608e-08	2.64181e-07	0	0	9.67416	178.05	TXNL4B;SNRPN;LSM5;LSM4;LSM3;EFTUD2;LSM7;LSM6;SNRPD2;ZMAT2;SNRPD1;PPIH;SNRPF;TXNL4A;SNRPB
U4/U6 x U5 tri-snRNP complex (GO:0046540)	15/32	1.01608e-08	2.64181e-07	0	0	9.67416	178.05	TXNL4B;SNRPN;LSM5;LSM4;LSM3;EFTUD2;LSM7;LSM6;SNRPD2;ZMAT2;SNRPD1;PPIH;SNRPF;TXNL4A;SNRPB
spliceosomal snRNP complex (GO:0097525)	19/51	1.21054e-08	2.95069e-07	0	0	6.5202	118.861	SF3B2;TXNL4B;SNRPN;SF3A2;LSM5;LSM4;LSM3;LSM7;LSM6;PHF5A;SNRPD2;SNRPD1;PPIH;SNRPA1;SNRPF;TXNL4A;SNRPC;SNRPA;SNRPB
endoplasmic reticulum membrane (GO:0005789)	103/712	3.46177e-08	7.94171e-07	0	0	1.89423	32.5408	KDELR1;ZDHHC1;CYP46A1;TM7SF2;TMEM147;TMEM38A;PTGDS;NOMO1;DGAT2;ALG9;DGAT1;PDIA6;BSCL2;CTDNEP1;DPM1;DPM2;DPM3;SELENOS;TBC1D20;TMX2;UBA52;SLC27A4;NECAB3;ABCB6;RPN2;LMAN2L;TTYH1;TEX264;MGST3;RPN1;UBE2J2;PLD3;HSP90B1;CYB5R1;PTDSS2;PORCN;PTDSS1;EBP;UBB;DDRGK1;UBC;HMOX2;FDFT1;VTI1B;HSPA5;WFS1;SURF4;DOLK;GRIN2C;GRIN2D;GRIN3A;G6PC3;REEP2;SRPRB;CALR;CNIH2;COPE;PIGS;GPSM1;MOXD1;PIGT;PIGO;GPAA1;PIGQ;TECR;US…
U2-type spliceosomal complex (GO:0005684)	25/89	4.77921e-08	1.0355e-06	0	0	4.29758	72.4418	SF3B2;EFTUD2;SNRPD2;ZMAT2;SNRPD1;U2AF2;DHX16;TXNL4A;SNRPN;SF3A2;CCDC12;BUD31;CDC5L;CWC15;LSM5;LSM4;LSM3;LSM7;LSM6;PHF5A;SNW1;SYF2;SNRPA1;SNRPF;SNRPB
mitochondrial ribosome (GO:0005761)	12/23	6.85646e-08	1.40738e-06	0	0	11.9432	197.01	MRPL20;NDUFA7;MRPL40;MRPL51;MRPL18;MRPS12;MRPL49;MRPL28;MRPL34;MRPL13;MRPL43;MRPL11
nucleolus (GO:0005730)	103/733	1.50377e-07	2.93234e-06	0	0	1.82892	28.7325	RPL4;POP5;RPL5;JPT1;SRP19;POP7;RPL3;SMARCB1;RRP1;RPL7;TXN2;RPS14;FBL;KAT5;RPS19;RPL36;HABP4;RPL35;KAT7;RPS11;RPS10;CDK5RAP3;RPS13;RPS9;RPS7;IMP3;PIH1D1;RPL23;RPS6;VRK3;EEF1A1;COX7A2L;MRTO4;SBDS;RPL27;RPL26;LETMD1;SRSF9;INO80E;MEAF6;RPS19BP1;NOLC1;ARL2;ABCB8;RPF2;ANAPC11;RPF1;DDRGK1;LLPH;NOP16;SURF2;PYM1;XRCC1;TBCA;RPS25;LSM6;CDK4;PIN4;MAGED2;NOL12;RTL8B;MRPS15;DDX47;FBLL1;RPL7A;RBM4;MRPL40;BUD23;…
ficolin-1-rich granule lumen (GO:1904813)	29/123	2.76433e-07	5.13375e-06	0	0	3.39679	51.2959	CSTB;PSMD11;CANT1;PSMD13;GSTP1;CTSZ;HMGB1;SRP14;GNS;ALAD;CST3;PSMB7;COMMD9;PSMD3;PSMB1;COTL1;CTSD;CTSB;HSPA8;DBNL;GSN;NME2;PDAP1;MIF;EEF1A1;PSMA2;CSNK2B;ALDOA;PPIA
U2-type precatalytic spliceosome (GO:0071005)	17/50	3.31117e-07	5.86981e-06	0	0	5.64998	84.3022	SF3B2;SF3A2;LSM5;LSM4;LSM3;EFTUD2;LSM7;LSM6;PHF5A;SNRPD2;ZMAT2;SNRPD1;DHX16;SNRPA1;SNRPF;TXNL4A;SNRPB
precatalytic spliceosome (GO:0071011)	17/52	6.27153e-07	1.06078e-05	0	0	5.32654	76.074	SF3B2;SF3A2;LSM5;LSM4;LSM3;EFTUD2;LSM7;LSM6;PHF5A;SNRPD2;ZMAT2;SNRPD1;DHX16;SNRPA1;SNRPF;TXNL4A;SNRPB
RNA polymerase II, core complex (GO:0005665)	9/15	6.52786e-07	1.06078e-05	0	0	16.397	233.527	POLR2C;POLR2D;POLR2E;POLR2F;POLR2H;POLR2I;POLR2J;POLR2K;POLR2L
mitochondrial envelope (GO:0005740)	28/127	1.86391e-06	2.9077e-05	0	0	3.11128	41.0466	COX19;NDUFA13;STOML2;NDUFB7;ABCB6;COX17;ARL2;ABCB8;TIMM10;CHCHD2;BLOC1S1;TMEM14C;PRELID3B;BOK;NDUFA8;PRELID1;NDUFA6;UQCC2;NDUFA2;NDUFA1;CHCHD10;SDHB;SOD1;TIMM10B;HAX1;NDUFS3;CYCS;TMBIM6
intracellular non-membrane-bounded organelle (GO:0043232)	142/1158	2.67827e-06	4.0174e-05	0	0	1.56804	20.1185	RPL4;POP5;JPT1;SRP19;RPL5;POP7;SMARCB1;RPL3;RRP1;AUP1;RPL9;CLU;TXN2;RPL7;RPS14;FBL;RPS17;KAT5;RPS19;RPS18;ARHGDIA;RPL36;HABP4;RPL35;KAT7;CIAO2B;RPS11;RPS10;CDK5RAP3;RPS13;RPS9;DGAT2;RPS7;ACTN2;IMP3;TPM3;PIH1D1;RPL23;RPS5;RPS6;TPM1;VRK3;EEF1A1;BSCL2;CTDNEP1;COX7A2L;MRTO4;SBDS;ANAPC5;RPL27;RPL26;LETMD1;SRSF9;RHNO1;INO80E;MEAF6;RPS19BP1;ARL2;NOLC1;ABCB8;ABHD5;RPF2;MRPL13;RPF1;ANAPC11;DDRGK1;LLPH;NOP…
nuclear lumen (GO:0031981)	99/745	3.36683e-06	4.83035e-05	0	0	1.70848	21.5295	RPL4;POP5;RPL5;JPT1;SRP19;POP7;RPL3;SMARCB1;RRP1;RPL7;TXN2;RPS14;FBL;KAT5;RPS19;RPL36;HABP4;RPL35;KAT7;RPS11;RPS10;CDK5RAP3;RPS13;RPS9;MLIP;RPS7;IMP3;PIH1D1;RPL23;RPS6;VRK3;EEF1A1;COX7A2L;MRTO4;SBDS;RPL27;RPL26;LETMD1;SRSF9;INO80E;MEAF6;RPS19BP1;NOLC1;ARL2;ABCB8;RPF2;ANAPC11;RPF1;DDRGK1;LLPH;JUN;NOP16;SURF2;PYM1;XRCC1;TBCA;RPS25;LSM6;CDK4;PIN4;MAGED2;NOL12;RTL8B;MRPS15;DDX47;FBLL1;RPL7A;RBM4;MRPL…
mitochondrial intermembrane space (GO:0005758)	17/58	3.46795e-06	4.83035e-05	0	0	4.54555	57.1465	COX19;NDUFA8;STOML2;PRELID1;NDUFB7;UQCC2;COX17;ARL2;CHCHD10;TIMM10;SOD1;TIMM10B;CHCHD2;HAX1;BLOC1S1;CYCS;PRELID3B
postsynaptic density (GO:0014069)	28/138	1.01402e-05	0.000134735	0	0	2.79846	32.1795	RPL30;RPL12;RPLP0;CABP1;RPL8;RPL7;RPS14;CACNG8;ADGRA1;RPS19;RPS18;RPL14;RPS3;RPL38;CACNG3;RPS13;DBNL;SIGMAR1;DTNBP1;GRIN2C;GRIN2D;GRIN1;RPS25;RPS27;CDK5;NSMF;CNIH2;DBN1
ficolin-1-rich granule (GO:0101002)	34/184	1.03642e-05	0.000134735	0	0	2.49553	28.6416	CSTB;PSMD11;CANT1;PSMD13;GSTP1;CTSZ;HMGB1;SRP14;GNS;ALAD;CST3;PSMB7;COMMD9;PSMD3;PSMB1;COTL1;CTSD;CTSB;HSPA8;DBNL;GSN;GAA;NME2;PDAP1;MIF;DYNLL1;EEF1A1;PSMA2;CSNK2B;LAMTOR1;ALDOA;PPIA;ATP6V0C;ARL8A
organelle envelope lumen (GO:0031970)	17/64	1.48897e-05	0.000187322	0	0	3.96397	44.0589	COX19;NDUFA8;STOML2;PRELID1;NDUFB7;UQCC2;COX17;ARL2;CHCHD10;TIMM10;SOD1;TIMM10B;CHCHD2;HAX1;BLOC1S1;CYCS;PRELID3B
U2-type catalytic step 2 spliceosome (GO:0071007)	11/30	1.76871e-05	0.000215561	0	0	6.33174	69.2862	EFTUD2;SNW1;SNRPD2;SNRPD1;SYF2;BUD31;CDC5L;SNRPA1;CWC15;SNRPF;SNRPB
secretory granule lumen (GO:0034774)	49/316	2.23231e-05	0.000263818	0	0	2.02591	21.6973	CTSZ;FAF2;HMGB1;SRP14;CLU;ALAD;PSMD3;COTL1;CTSD;SPTAN1;DBNL;ACTN2;ACTN1;NME2;ACTN4;MIF;APRT;EEF1A1;PSMA2;CSNK2B;ALDOA;PPIA;CSTB;GRN;PSMD11;CANT1;TEX264;PSMD13;GSTP1;PDGFA;GNS;PSMB7;COMMD9;CREG1;NEU1;PSMB1;VTI1B;TXNDC5;CTSA;VAT1;HSPA8;GSN;TRAPPC1;PTGES2;FUCA1;IGF2;VEGFB;PCYOX1L;MAGED2
intracellular organelle lumen (GO:0070013)	105/848	3.71466e-05	0.000426094	0	0	1.57277	16.0432	SPON1;ACAA2;ECI1;ALKBH7;SRP14;TXN2;LGALS1;PSMD3;COTL1;CHGB;MLIP;IGFBP4;PAM16;SHISA5;CNPY3;MIF;PDIA6;EEF1A1;SELENOM;ETHE1;CLPP;CSNK2B;DNAJB11;FDX1;FDX2;ERP29;PPIB;PPIA;SCG2;ISCU;PSMD11;PSMD13;PDGFA;ARL2;GNS;HSP90B1;PRDX5;COMMD9;BLOC1S1;PENK;TSPAN5;APOE;MPST;HSPA8;HSPA5;WFS1;UQCC2;HYOU1;CALR;COL9A2;PODXL2;PRKCSH;CTSZ;DBI;ETFB;HMGB1;FARS2;ALAD;MYDGF;CTSL;SDF4;CTSD;SPTAN1;CTSB;TSFM;DBNL;GPX1;SIRT4;NM…
U12-type spliceosomal complex (GO:0005689)	10/28	5.56216e-05	0.000619784	0	0	6.07261	59.493	ZRSR2;SF3B2;LSM7;PHF5A;SNRPD2;SNRPD1;ZMAT5;SNRNP25;SNRPF;SNRPB
vacuolar membrane (GO:0005774)	13/45	5.73694e-05	0.000621501	0	0	4.44517	43.4115	NAPA;GABARAPL2;GABARAPL1;ATP6V1G2;ABCB6;TEX264;VPS4A;GABARAP;MAP1LC3B;MAP1LC3A;ATG16L2;ARL8A;ATP6V1F
mitochondrial matrix (GO:0005759)	51/348	7.0237e-05	0.000740336	0	0	1.89478	18.121	ACAA2;ECI1;MRPS12;ETFB;ALKBH7;MRPL34;FARS2;TXN2;MRPL40;TSFM;GPX1;PAM16;MRPL49;SIRT4;MRPL43;SIRT3;SMDT1;MRPL51;NDUFS8;NDUFS7;TST;CLPP;ETHE1;FDX1;FDX2;NDUFS3;ISCU;NDUFB8;NAXE;MRPL18;ARL2;MRPL58;MRPL13;MRPL11;MRPL20;HMGCL;PRDX5;BLOC1S1;RPS3;NT5M;DNAJC19;MPST;GADD45GIP1;NDUFA7;MDH2;UQCC2;MRPL28;HSPE1;SOD1;MTRES1;SARDH
U6 snRNP (GO:0005688)	5/7	7.64634e-05	0.000767894	0	0	27.2692	258.477	LSM7;LSM6;LSM5;LSM4;LSM3
cytoplasmic vesicle lumen (GO:0060205)	23/115	7.67894e-05	0.000767894	0	0	2.74293	25.9877	HSPA8;CSTB;PSMD11;DBNL;GSN;PSMD13;GSTP1;NME2;MIF;HMGB1;SRP14;APRT;EEF1A1;ALAD;PSMB7;COMMD9;PSMA2;PSMD3;CSNK2B;PSMB1;COTL1;ALDOA;PPIA
asymmetric synapse (GO:0032279)	25/133	0.000110356	0.00107597	0	0	2.54058	23.1492	RPL30;RPL12;RPLP0;CABP1;RPL8;RPL7;RPS14;CACNG8;ADGRA1;RPS19;RPS18;RPL14;RPS3;RPL38;RPS13;DBNL;SIGMAR1;DTNBP1;GRIN1;RPS25;RPS27;CDK5;NSMF;CNIH2;DBN1
U2 snRNP (GO:0005686)	8/20	0.00012441	0.00118341	0	0	7.28083	65.4687	SF3B2;SF3A2;SNRPN;PHF5A;SNRPD2;SNRPD1;SNRPA1;SNRPB
chromaffin granule (GO:0042583)	4/5	0.000233651	0.00211395	0	0	43.6071	364.629	CHGA;CTSL;SRI;CYB561
cytoplasmic side of lysosomal membrane (GO:0098574)	4/5	0.000233651	0.00211395	0	0	43.6071	364.629	EEF1A1;EEF1A2;CDIP1;BORCS5
integral component of organelle membrane (GO:0031301)	34/214	0.000238497	0.00211395	0	0	2.07618	17.3177	RTN2;PIGT;SYS1;SLC35B1;TECR;EMC10;AUP1;TMEM163;TM7SF2;SLC22A17;EMC1;SARAF;WDR83OS;FIS1;SLC35A4;DGAT2;SLC32A1;HSPA5;RHBDD2;WFS1;SYVN1;SLC39A13;DOLK;SYP;POMGNT1;YIF1A;BSCL2;DPM3;B4GAT1;SELENOS;TBC1D20;ERGIC3;SLC25A4;ITM2B
endosome membrane (GO:0010008)	46/325	0.000346586	0.00300374	0	0	1.81553	14.465	SLC48A1;ABCB6;VPS4A;CLTA;WDR83;TMEM163;PLD3;SCAMP5;SCAMP4;GGA1;SNX1;GGA3;UBB;UBC;AP2S1;ATP6V0E2;RPS27A;SNX8;CTSD;UBXN6;VTI1B;BOK;PSENEN;ATP6V0B;MON2;AMN;ATP6AP1;VPS37D;SNX21;SNF8;NSG1;MCOLN1;SCAMP3;RAB11B;CLIP3;ABHD17A;UBAP1;LAMTOR2;LAMTOR1;CHMP6;UBA52;VPS25;ATP6V0C;LAMTOR3;VPS28;CD320
RNA polymerase I complex (GO:0005736)	6/13	0.000360589	0.00305717	0	0	9.35246	74.1442	POLR1D;POLR2E;POLR2F;POLR2H;POLR2K;POLR2L
U4 snRNP (GO:0005687)	5/9	0.000397144	0.00326637	0	0	13.6331	106.764	SNRPN;SNRPD2;SNRPD1;SNRPF;SNRPB
RNA polymerase III complex (GO:0005666)	7/18	0.00041039	0.00326637	0	0	6.94612	54.1686	POLR3D;POLR1D;POLR2E;POLR2F;POLR2H;POLR2K;POLR2L
U1 snRNP (GO:0005685)	7/18	0.00041039	0.00326637	0	0	6.94612	54.1686	SNRPN;SNRPD2;SNRPD1;SNRPF;SNRPC;SNRPA;SNRPB
TIM23 mitochondrial import inner membrane translocase complex (GO:0005744)	6/14	0.000586162	0.00457206	0	0	8.18296	60.8969	DNAJC19;PAM16;TIMM17A;TIMM17B;ROMO1;TIMM10
intracellular membrane-bounded organelle (GO:0043231)	494/5192	0.000603976	0.00461864	0	0	1.20332	8.91896	RPL4;RPL5;RPL30;POP7;SLC4A1AP;RPL3;RRP1;THYN1;PHAX;TMEM91;RPL9;RPL6;RPL7;PSMD8;CRHBP;PSMD9;SCP2;PSMD4;PSMD3;AP1S1;CDK5RAP3;CHID1;HES6;DAXX;ENDOG;PIH1D1;RPL22;AARSD1;MED4;SCAMP3;MED6;EID2;RNF126;DDIT3;CLNS1A;CDIP1;ATF7;RPL27;ATF5;VPS25;UBA52;ATF4;RHNO1;LRPAP1;MRPL19;XPA;SDR39U1;OAZ1;OAZ2;ANAPC11;PRDX5;SERF2;VTI1B;HEXIM1;JUN;NCAPH2;IRF2BP1;NFATC2;PBX4;SNF8;LARP6;NR2F6;FIBP;HNRNPC;PKIG;PHF23;RPLP0;H…
rough endoplasmic reticulum membrane (GO:0030867)	4/6	0.000653984	0.00490488	0	0	21.8024	159.864	RPS26;RPS28;RPS29;RPL27
lysosomal membrane (GO:0005765)	45/330	0.000889709	0.00654692	0	0	1.73703	12.202	SLC48A1;SCARB1;GRN;ABCB6;LRP1;BRI3;CLTA;BLOC1S1;GNA11;PSAP;AP2S1;TOM1;AP1S1;GPR137;ATP6V1E1;ATP6V0E2;CTSD;UBXN6;VTI1B;BORCS5;CTSA;SLC36A1;HSPA8;ATP6V0B;GAA;SURF4;MCOLN1;TM6SF1;MFSD12;DDOST;EEF1A1;GNB2;EEF1A2;SPNS1;CDIP1;LAMTOR2;LAMTOR1;TMEM9;LAMTOR4;UBA52;ATP6V0C;CYB561;LAMTOR3;ARL8A;LAMTOR5
mitochondrial outer membrane translocase complex (GO:0005742)	7/21	0.00119746	0.0086483	0	0	5.45677	36.7107	TOMM40;MTX1;CHCHD6;TOMM7;MICOS13;MICOS10;TOMM22
vesicle (GO:0031982)	33/226	0.00132066	0.0093647	0	0	1.87689	12.4431	RAB3B;RAB3A;DCTN2;CD81;GSTP1;CEND1;ATP1A3;CIB1;CYB561D2;GNAI2;SNX1;UBB;CFL1;UBC;APOE;RPS27A;SPTAN1;DYNC1I1;VTI1B;PRRT2;STX8;MIF;MYL6;GIPC1;RAB34;GNB2;CALM3;MFGE8;UBA52;CALM2;PPIA;GAPDH;VAMP2

## Sheet: Module_2_KEGG
Term	Overlap	P.value	Adjusted.P.value	Old.P.value	Old.Adjusted.P.value	Odds.Ratio	Combined.Score	Genes
Ribosome	108/170	3.6919e-73	1.04481e-70	0	0	20.1759	3365	RPL4;RPL5;RPL30;RPL3;RPL32;RPL31;RPL34;RPL8;RPL10A;RPL9;RPL6;RPL7;RPS15;RPS14;RPS17;RPS16;RPS19;RPL18A;RPL36AL;RPS18;RPL36;RPL35;RPL38;RPL37;RPS11;RPL39;RPS10;RPS13;RPS12;RPS9;RPL21;RPS7;RPS8;RPL23;RPS5;RPL22;RPS6;MRPS18A;RPSA;MRPS18C;RPL24;RPL27;RPL26;RPL29;RPL28;UBA52;MRPL18;MRPL19;MRPL17;MRPL14;MRPL12;MRPL13;MRPL10;MRPL11;MRPL20;RPL41;MRPL27;MRPL28;MRPL23;MRPL22;RPS26;MRPL30;RPS25;RPS28;RPS27;…
Oxidative phosphorylation	65/134	1.97289e-34	2.79164e-32	0	0	10.6172	823.982	NDUFA13;COX7B;NDUFA11;NDUFA12;COX4I1;COX6A1;ATP5G2;COX6A2;COX7C;ATP5G1;ATP6V1E1;COX8A;ATP6V0B;ATP6V1G2;ATP6AP1;SDHC;NDUFC1;SDHB;ATP5J2;COX6B1;COX7A2L;NDUFS8;NDUFS7;PPA1;NDUFS6;NDUFS5;NDUFS4;NDUFS3;ATP6V0C;NDUFB9;NDUFB8;NDUFB7;NDUFB10;NDUFB11;NDUFB5;NDUFB4;COX17;ATP5A1;NDUFB3;ATP5K;NDUFB2;COX7A2;UQCR11;ATP5H;UQCR10;ATP5O;COX5B;UQCRH;ATP5L;ATP5B;ATP5E;ATP5D;NDUFV3;CYC1;NDUFV2;ATP6V0E2;ATP6V1F;NDUFA…
Parkinson disease	65/144	4.55995e-32	4.30155e-30	0	0	9.26814	668.839	NDUFA13;COX7B;NDUFA11;NDUFA12;COX4I1;PARK7;COX6A1;ATP5G2;COX6A2;COX7C;ATP5G1;UCHL1;COX8A;SDHC;NDUFC1;SDHB;COX6B1;COX7A2L;NDUFS8;NDUFS7;ADORA2A;NDUFS6;NDUFS5;NDUFS4;PPIF;NDUFS3;SLC25A4;NDUFB9;NDUFB8;NDUFB7;NDUFB10;NDUFB11;NDUFB5;NDUFB4;ATP5A1;NDUFB3;NDUFB2;COX7A2;UQCR11;ATP5H;UQCR10;UBE2J2;ATP5O;COX5B;UQCRH;GNAI2;ATP5B;UBB;ATP5E;ATP5D;NDUFV3;CYC1;NDUFV2;DRD2;NDUFA8;NDUFA7;NDUFA6;NDUFA5;NDUFA3;NDUF…
Huntington disease	74/192	8.27728e-31	5.85618e-29	0	0	7.08839	490.989	NDUFA13;COX7B;NDUFA11;NDUFA12;COX4I1;CLTB;CLTA;COX6A1;ATP5G2;COX6A2;COX7C;ATP5G1;IFT57;COX8A;GPX1;SDHC;NDUFC1;SDHB;COX6B1;COX7A2L;NDUFS8;NDUFS7;NDUFS6;NDUFS5;NDUFS4;PPIF;NDUFS3;SLC25A4;NDUFB9;NDUFB8;NDUFB7;NDUFB10;DCTN2;NDUFB11;NDUFB5;NDUFB4;ATP5A1;NDUFB3;NDUFB2;COX7A2;UQCR11;ATP5H;UQCR10;ATP5O;COX5B;UQCRH;ATP5B;ATP5E;POLR2C;ATP5D;POLR2D;AP2S1;POLR2E;POLR2F;NDUFV3;CYC1;POLR2H;NDUFV2;POLR2I;POLR2J…
Alzheimer disease	65/175	3.9031e-26	2.20915e-24	0	0	6.6449	388.763	NDUFA13;COX7B;NDUFA11;NDUFA12;COX4I1;COX6A1;ATP5G2;COX6A2;COX7C;ATP5G1;COX8A;PSENEN;SDHC;NDUFC1;SDHB;COX6B1;COX7A2L;NDUFS8;NDUFS7;NDUFS6;NDUFS5;NDUFS4;NDUFS3;GAPDH;NDUFB9;NDUFB8;NDUFB7;NDUFB10;LRP1;NDUFB11;NDUFB5;NDUFB4;ATP5A1;NDUFB3;NDUFB2;COX7A2;UQCR11;ATP5H;UQCR10;ATP5O;COX5B;UQCRH;ATP5B;ATP5E;ATP5D;NDUFV3;APOE;CYC1;NDUFV2;MAPK3;NDUFA8;NDUFA7;NDUFA6;NDUFA5;NDUFA3;NDUFA2;NDUFA1;GRIN2C;GRIN2D;GR…
Thermogenesis	69/231	2.20351e-21	1.03932e-19	0	0	4.78778	227.727	COX7B;NDUFA13;SMARCB1;NDUFA11;NDUFA12;COX4I1;COX6A1;ATP5G2;COX7C;COX6A2;ATP5G1;DPF1;HRAS;COX8A;RPS6;SDHC;NDUFC1;SDHB;COX6B1;ATP5J2;COX7A2L;NDUFS8;NDUFS7;NDUFS6;NDUFS5;AKT1S1;NDUFS4;NDUFS3;COX19;NDUFB9;NDUFB8;NDUFB7;SMARCD3;NDUFB10;NDUFB11;NDUFB5;NDUFB4;ATP5A1;COX17;NDUFB3;ATP5K;NDUFB2;UQCR11;COX7A2;ATP5H;UQCR10;ATP5O;COX5B;UQCRH;ATP5L;ATP5B;ATP5E;ATP5D;COX14;NDUFV3;CYC1;NDUFV2;COA3;NDUFA8;NDUFA7;…
Non-alcoholic fatty liver disease (NAFLD)	52/151	1.81194e-19	7.32541e-18	0	0	5.86307	253.019	NDUFA13;GSK3A;COX7B;NDUFA11;NDUFA12;COX4I1;COX6A1;COX6A2;COX7C;COX8A;SDHC;NDUFC1;SDHB;COX6B1;COX7A2L;NDUFS8;NDUFS7;NDUFS6;DDIT3;NDUFS5;NDUFS4;NDUFS3;ATF4;NDUFB9;NDUFB8;NDUFB7;NDUFB10;NDUFB11;NDUFB5;NDUFB4;NDUFB3;NDUFB2;COX7A2;UQCR11;UQCR10;COX5B;UQCRH;NDUFV3;CYC1;NDUFV2;NDUFA8;XBP1;JUN;NDUFA7;NDUFA6;NDUFA5;NDUFA3;NDUFA2;NDUFA1;UQCRQ;CYCS;BAX
Spliceosome	38/132	7.44325e-12	2.63305e-10	0	0	4.4753	114.674	SF3B2;PQBP1;EFTUD2;SNRPD2;ZMAT2;PUF60;SNRPD1;U2AF2;PCBP1;DHX16;TXNL4A;HSPA8;SF3A2;CCDC12;ALYREF;BUD31;CDC5L;CWC15;LSM5;LSM4;LSM3;LSM7;RBMXL1;LSM6;SNW1;PHF5A;SYF2;SRSF2;SNRNP27;PPIH;SNRPA1;RP9;SNRPF;HNRNPC;SNRPC;SNRPA;SNRPB;SRSF9
Protein processing in endoplasmic reticulum	40/163	4.58826e-10	1.44275e-08	0	0	3.5988	77.3826	RPN2;PRKCSH;RPN1;UBE2J2;HSPBP1;RNF5;HSP90B1;SEC61G;LMAN2;SIL1;UBXN6;TXNDC5;BCAP31;HSPA8;XBP1;HSPA5;SSR4;WFS1;SSR2;SYVN1;RAD23A;UBE2G2;PDIA6;DDOST;PDIA4;DNAJA1;NSFL1C;SELENOS;DAD1;DDIT3;DNAJB11;CANX;DNAJA2;ERP29;BAX;HYOU1;STUB1;CALR;P4HB;ATF4
Proteasome	18/46	1.17961e-08	3.209e-07	0	0	7.05677	128.825	PSMD11;PSMD13;POMP;PSMB10;PSMD8;PSMB6;SEM1;PSMB7;PSMB4;PSMB5;PSMD4;PSMB2;PSMB3;PSMA2;PSMB1;PSMD3;PSME1;PSME2
Cardiac muscle contraction	24/78	1.24732e-08	3.209e-07	0	0	4.88942	88.986	COX8A;COX7B;TPM3;COX4I1;TPM2;TPM1;CACNA2D2;ATP1A3;UQCR11;COX7A2;UQCR10;COX6A1;COX5B;COX7C;COX6A2;UQCRH;COX6B1;CACNB1;COX7A2L;CACNG8;UQCRQ;FXYD2;CYC1;CACNG3
Retrograde endocannabinoid signaling	35/150	2.2304e-08	5.26002e-07	0	0	3.35927	59.1853	NDUFB9;NDUFA13;NDUFB8;NDUFB7;NDUFA11;NDUFB10;NDUFA12;NDUFB11;NDUFB5;NDUFB4;NDUFB3;NDUFB2;GNAI2;GNG3;NDUFV3;NDUFV2;MAPK3;NDUFA8;NDUFA7;NDUFA6;SLC32A1;NDUFA5;NDUFA3;NDUFA2;NDUFA1;NDUFC1;GNG13;NDUFS8;NDUFS7;NDUFS6;GNB2;NDUFS5;NDUFS4;NDUFS3;GNB5
RNA polymerase	11/28	8.1423e-06	0.000177252	0	0	7.07742	82.9363	ZNRD1;POLR2C;POLR3D;POLR2D;POLR2E;POLR1D;POLR2F;POLR2H;POLR2I;POLR2J;POLR2L
Synaptic vesicle cycle	18/77	5.48768e-05	0.0011093	0	0	3.3433	32.7991	NAPA;ATP6V0B;RAB3A;ATP6V1G2;SLC32A1;CLTB;CLTA;SLC6A1;SLC1A6;CPLX1;SLC6A7;AP2S1;ATP6V1E1;ATP6V0E2;ATP6V0C;STX1A;VAMP2;ATP6V1F
Cocaine addiction	13/48	0.000119428	0.00225321	0	0	4.06349	36.7046	GPSM1;JUN;PDYN;GRIN2C;GNAI2;GRIN2D;GRIN1;GRIN3A;TH;CDK5;PPP1R1B;DRD2;ATF4
Lysosome	23/124	0.000250233	0.004426	0	0	2.49727	20.7102	CTSA;ATP6V0B;ATP6AP1;FUCA1;GAA;CTSZ;HEXA;CLTB;CLTA;MCOLN1;GNS;GNPTG;GGA1;GGA3;CTSL;SMPD1;PSAP;NEU1;AP1S1;CTSD;ATP6V0C;LGMN;CTSB

## Sheet: Module_2_BPred
go	cluster	parent	parentSimScore	score	size	term	parentTerm
GO:0015031	1	GO:0015031	0.983	623	623	protein transport	protein transport
GO:0006511	2	GO:0006511	0.994	361	361	ubiquitin-dependent protein catabolic process	ubiquitin-dependent protein catabolic process
GO:0006397	3	GO:0006397	0.994	349	349	mRNA processing	mRNA processing
GO:0006412	4	GO:0006412	0.992	299	299	translation	translation
GO:0008380	3	GO:0006397	0.825	265	265	RNA splicing	mRNA processing
GO:0043161	2	GO:0006511	0.942	223	223	proteasome-mediated ubiquitin-dependent protein catabolic process	ubiquitin-dependent protein catabolic process
GO:0042981	5	GO:0042981	0.982	200	200	regulation of apoptotic process	regulation of apoptotic process
GO:0000398	3	GO:0006397	0.936	180	180	mRNA splicing, via spliceosome	mRNA processing
GO:0006364	3	GO:0006397	0.754	149	149	rRNA processing	mRNA processing
GO:0006888	6	GO:0006888	0.999	128	128	endoplasmic reticulum to Golgi vesicle-mediated transport	endoplasmic reticulum to Golgi vesicle-mediated transport
GO:0042254	7	GO:0042254	0.996	107	107	ribosome biogenesis	ribosome biogenesis
GO:0007005	8	GO:0007005	0.994	104	104	mitochondrion organization	mitochondrion organization
GO:0034976	9	GO:0034976	0.997	101	101	response to endoplasmic reticulum stress	response to endoplasmic reticulum stress
GO:0071456	9	GO:0034976	0.547	86	86	cellular response to hypoxia	response to endoplasmic reticulum stress
GO:0031146	2	GO:0006511	0.785	68	68	SCF-dependent proteasomal ubiquitin-dependent protein catabolic process	ubiquitin-dependent protein catabolic process
GO:0006396	3	GO:0006397	0.904	66	66	RNA processing	mRNA processing
GO:0032981	7	GO:0042254	0.492	62	62	mitochondrial respiratory chain complex I assembly	ribosome biogenesis
GO:0071347	10	GO:0071347	0.999	61	61	cellular response to interleukin-1	cellular response to interleukin-1
GO:0006289	11	GO:0006289	0.999	53	53	nucleotide-excision repair	nucleotide-excision repair
GO:0006414	4	GO:0006412	0.781	51	51	translational elongation	translation
GO:0006605	1	GO:0015031	0.79	49	49	protein targeting	protein transport
GO:0010467	12	GO:0010467	0.896	46	46	gene expression	gene expression
GO:0033209	10	GO:0071347	0.632	46	46	tumor necrosis factor-mediated signaling pathway	cellular response to interleukin-1
GO:0002181	4	GO:0006412	0.794	46	46	cytoplasmic translation	translation
GO:0032543	13	GO:0032543	0.999	43	43	mitochondrial translation	mitochondrial translation
GO:0000184	2	GO:0006511	0.655	43	43	nuclear-transcribed mRNA catabolic process, nonsense-mediated decay	ubiquitin-dependent protein catabolic process
GO:0043488	2	GO:0006511	0.72	43	43	regulation of mRNA stability	ubiquitin-dependent protein catabolic process
GO:0016236	2	GO:0006511	0.646	42	42	macroautophagy	ubiquitin-dependent protein catabolic process
GO:2001244	5	GO:0042981	0.676	40	40	positive regulation of intrinsic apoptotic signaling pathway	regulation of apoptotic process
GO:0010498	2	GO:0006511	0.917	36	36	proteasomal protein catabolic process	ubiquitin-dependent protein catabolic process
GO:0042273	7	GO:0042254	0.86	34	34	ribosomal large subunit biogenesis	ribosome biogenesis
GO:2001243	5	GO:0042981	0.709	33	33	negative regulation of intrinsic apoptotic signaling pathway	regulation of apoptotic process
GO:0033617	8	GO:0007005	0.747	31	31	mitochondrial cytochrome c oxidase assembly	mitochondrion organization
GO:0000027	7	GO:0042254	0.793	30	30	ribosomal large subunit assembly	ribosome biogenesis
GO:0009060	14	GO:0009060	0.999	30	30	aerobic respiration	aerobic respiration
GO:0070498	10	GO:0071347	0.938	27	27	interleukin-1-mediated signaling pathway	cellular response to interleukin-1
GO:0045055	6	GO:0006888	0.587	27	27	regulated exocytosis	endoplasmic reticulum to Golgi vesicle-mediated transport
GO:0006261	15	GO:0006261	0.999	26	26	DNA-dependent DNA replication	DNA-dependent DNA replication
GO:0010499	2	GO:0006511	0.687	24	24	proteasomal ubiquitin-independent protein catabolic process	ubiquitin-dependent protein catabolic process
GO:0006626	1	GO:0015031	0.694	24	24	protein targeting to mitochondrion	protein transport
GO:0060071	16	GO:0060071	1	23	23	Wnt signaling pathway, planar cell polarity pathway	Wnt signaling pathway, planar cell polarity pathway
GO:2000059	2	GO:0006511	0.781	23	23	negative regulation of ubiquitin-dependent protein catabolic process	ubiquitin-dependent protein catabolic process
GO:0042274	7	GO:0042254	0.863	22	22	ribosomal small subunit biogenesis	ribosome biogenesis
GO:0031145	2	GO:0006511	0.725	21	21	anaphase-promoting complex-dependent catabolic process	ubiquitin-dependent protein catabolic process
GO:0000956	2	GO:0006511	0.74	21	21	nuclear-transcribed mRNA catabolic process	ubiquitin-dependent protein catabolic process
GO:0000028	7	GO:0042254	0.775	21	21	ribosomal small subunit assembly	ribosome biogenesis
GO:0006120	14	GO:0009060	0.811	20	20	mitochondrial electron transport, NADH to ubiquinone	aerobic respiration
GO:0006839	6	GO:0006888	0.337	18	18	mitochondrial transport	endoplasmic reticulum to Golgi vesicle-mediated transport
GO:0045333	14	GO:0009060	0.937	18	18	cellular respiration	aerobic respiration
GO:0000470	7	GO:0042254	0.795	15	15	maturation of LSU-rRNA	ribosome biogenesis
GO:0006283	11	GO:0006289	0.874	14	14	transcription-coupled nucleotide-excision repair	nucleotide-excision repair
GO:0045047	1	GO:0015031	0.668	13	13	protein targeting to ER	protein transport
GO:0006614	1	GO:0015031	0.62	13	13	SRP-dependent cotranslational protein targeting to membrane	protein transport
GO:0042775	14	GO:0009060	0.864	13	13	mitochondrial ATP synthesis coupled electron transport	aerobic respiration
GO:0045039	1	GO:0015031	0.592	13	13	protein insertion into mitochondrial inner membrane	protein transport
GO:0006123	14	GO:0009060	0.878	12	12	mitochondrial electron transport, cytochrome c to oxygen	aerobic respiration
GO:0044267	12	GO:0010467	0.524	12	12	cellular protein metabolic process	gene expression
GO:0006122	14	GO:0009060	0.776	12	12	mitochondrial electron transport, ubiquinol to cytochrome c	aerobic respiration
GO:0006370	3	GO:0006397	0.697	11	11	7-methylguanosine mRNA capping	mRNA processing
GO:0033108	8	GO:0007005	0.831	10	10	mitochondrial respiratory chain complex assembly	mitochondrion organization
GO:0010972	17	GO:0010972	1	10	10	negative regulation of G2/M transition of mitotic cell cycle	negative regulation of G2/M transition of mitotic cell cycle
GO:0042590	18	GO:0042590	1	9	9	antigen processing and presentation of exogenous peptide antigen via MHC class I	antigen processing and presentation of exogenous peptide antigen via MHC class I
GO:0038061	19	GO:0038061	0.999	8	8	NIK/NF-kappaB signaling	NIK/NF-kappaB signaling
GO:0042255	7	GO:0042254	0.842	7	7	ribosome assembly	ribosome biogenesis
GO:2000736	16	GO:0060071	0.41	7	7	regulation of stem cell differentiation	Wnt signaling pathway, planar cell polarity pathway
GO:0072655	1	GO:0015031	0.699	7	7	establishment of protein localization to mitochondrion	protein transport
GO:0050434	20	GO:0050434	1	7	7	positive regulation of viral transcription	positive regulation of viral transcription
GO:1903573	9	GO:0034976	0.843	7	7	negative regulation of response to endoplasmic reticulum stress	response to endoplasmic reticulum stress
GO:0043687	21	GO:0043687	1	7	7	post-translational protein modification	post-translational protein modification
GO:1902036	16	GO:0060071	0.4	7	7	regulation of hematopoietic stem cell differentiation	Wnt signaling pathway, planar cell polarity pathway
GO:0035973	2	GO:0006511	0.485	7	7	aggrephagy	ubiquitin-dependent protein catabolic process
GO:0006415	4	GO:0006412	0.7	6	6	translational termination	translation
GO:0048524	20	GO:0050434	0.899	6	6	positive regulation of viral process	positive regulation of viral transcription
GO:1901798	19	GO:0038061	0.427	6	6	positive regulation of signal transduction by p53 class mediator	NIK/NF-kappaB signaling
GO:0090175	16	GO:0060071	0.994	6	6	regulation of establishment of planar polarity	Wnt signaling pathway, planar cell polarity pathway
GO:1905907	22	GO:1905907	1	6	6	negative regulation of amyloid fibril formation	negative regulation of amyloid fibril formation
GO:0070125	4	GO:0006412	0.63	5	5	mitochondrial translational elongation	translation
GO:0065002	1	GO:0015031	0.682	5	5	intracellular protein transmembrane transport	protein transport
GO:0043043	4	GO:0006412	0.989	5	5	peptide biosynthetic process	translation
GO:0045048	1	GO:0015031	0.576	5	5	protein insertion into ER membrane	protein transport
GO:0065004	7	GO:0042254	0.55	5	5	protein-DNA complex assembly	ribosome biogenesis
GO:1902255	19	GO:0038061	0.395	5	5	positive regulation of intrinsic apoptotic signaling pathway by p53 class mediator	NIK/NF-kappaB signaling
GO:0070126	4	GO:0006412	0.621	4	4	mitochondrial translational termination	translation
GO:1901532	16	GO:0060071	0.425	4	4	regulation of hematopoietic progenitor cell differentiation	Wnt signaling pathway, planar cell polarity pathway
GO:0010565	23	GO:0010565	0.999	4	4	regulation of cellular ketone metabolic process	regulation of cellular ketone metabolic process
GO:0051204	1	GO:0015031	0.631	4	4	protein insertion into mitochondrial membrane	protein transport
GO:1901991	17	GO:0010972	0.92	4	4	negative regulation of mitotic cell cycle phase transition	negative regulation of G2/M transition of mitotic cell cycle
GO:0006613	1	GO:0015031	0.625	3	3	cotranslational protein targeting to membrane	protein transport
GO:0034645	12	GO:0010467	0.517	3	3	cellular macromolecule biosynthetic process	gene expression
GO:0000715	11	GO:0006289	0.8	3	3	nucleotide-excision repair, DNA damage recognition	nucleotide-excision repair
GO:0061418	9	GO:0034976	0.467	3	3	regulation of transcription from RNA polymerase II promoter in response to hypoxia	response to endoplasmic reticulum stress
GO:1902235	9	GO:0034976	0.808	3	3	regulation of endoplasmic reticulum stress-induced intrinsic apoptotic signaling pathway	response to endoplasmic reticulum stress
GO:0070646	21	GO:0043687	0.374	3	3	protein modification by small protein removal	post-translational protein modification
GO:0022618	7	GO:0042254	0.876	2	2	ribonucleoprotein complex assembly	ribosome biogenesis
GO:0010257	7	GO:0042254	0.493	2	2	NADH dehydrogenase complex assembly	ribosome biogenesis
GO:0034470	3	GO:0006397	0.806	2	2	ncRNA processing	mRNA processing
GO:0048239	11	GO:0006289	0.466	2	2	negative regulation of DNA recombination at telomere	nucleotide-excision repair
GO:1902750	17	GO:0010972	0.987	2	2	negative regulation of cell cycle G2/M phase transition	negative regulation of G2/M transition of mitotic cell cycle
GO:1901987	17	GO:0010972	0.861	2	2	regulation of cell cycle phase transition	negative regulation of G2/M transition of mitotic cell cycle
GO:0002479	18	GO:0042590	0.919	2	2	antigen processing and presentation of exogenous peptide antigen via MHC class I, TAP-dependent	antigen processing and presentation of exogenous peptide antigen via MHC class I
GO:0019646	14	GO:0009060	0.882	1	1	aerobic electron transport chain	aerobic respiration
GO:0061013	2	GO:0006511	0.741	1	1	regulation of mRNA catabolic process	ubiquitin-dependent protein catabolic process
GO:0016072	3	GO:0006397	0.431	1	1	rRNA metabolic process	mRNA processing
GO:0061912	2	GO:0006511	0.564	1	1	selective autophagy	ubiquitin-dependent protein catabolic process
GO:0140053	13	GO:0032543	0.966	1	1	mitochondrial gene expression	mitochondrial translation
GO:0046782	20	GO:0050434	0.952	1	1	regulation of viral transcription	positive regulation of viral transcription
GO:0009452	3	GO:0006397	0.59	1	1	7-methylguanosine RNA capping	mRNA processing
GO:0006521	24	GO:0006521	1	1	1	regulation of cellular amino acid metabolic process	regulation of cellular amino acid metabolic process
GO:0043618	9	GO:0034976	0.523	1	1	regulation of transcription from RNA polymerase II promoter in response to stress	response to endoplasmic reticulum stress
GO:0072695	11	GO:0006289	0.466	0	0	regulation of DNA recombination at telomere	nucleotide-excision repair
GO:0080090	23	GO:0010565	0.385	0	0	regulation of primary metabolic process	regulation of cellular ketone metabolic process
GO:0036388	15	GO:0006261	0.791	0	0	pre-replicative complex assembly	DNA-dependent DNA replication
GO:0000377	3	GO:0006397	0.785	0	0	RNA splicing, via transesterification reactions with bulged adenosine as nucleophile	mRNA processing
GO:0033238	24	GO:0006521	0.945	0	0	regulation of cellular amine metabolic process	regulation of cellular amino acid metabolic process
GO:0022613	7	GO:0042254	0.972	0	0	ribonucleoprotein complex biogenesis	ribosome biogenesis

## Sheet: Module_2_CCred
go	cluster	parent	parentSimScore	score	size	term	parentTerm
GO:0043231	1	GO:0043231	0.734	1078	1078	intracellular membrane-bounded organelle	intracellular membrane-bounded organelle
GO:0005730	2	GO:0005730	0.99	878	878	nucleolus	nucleolus
GO:0005743	3	GO:0005743	0.993	487	487	mitochondrial inner membrane	mitochondrial inner membrane
GO:0005789	4	GO:0005789	0.992	485	485	endoplasmic reticulum membrane	endoplasmic reticulum membrane
GO:0014069	5	GO:0014069	0.995	415	415	postsynaptic density	postsynaptic density
GO:0005925	5	GO:0014069	0.441	218	218	focal adhesion	postsynaptic density
GO:0031982	6	GO:0031982	0.958	191	191	vesicle	vesicle
GO:0005759	2	GO:0005730	0.47	177	177	mitochondrial matrix	nucleolus
GO:0005840	7	GO:0005840	0.995	174	174	ribosome	ribosome
GO:0005765	4	GO:0005789	0.564	162	162	lysosomal membrane	endoplasmic reticulum membrane
GO:0022625	7	GO:0005840	0.851	108	108	cytosolic large ribosomal subunit	ribosome
GO:0031966	3	GO:0005743	0.95	107	107	mitochondrial membrane	mitochondrial inner membrane
GO:0005747	8	GO:0005747	0.999	100	100	mitochondrial respiratory chain complex I	mitochondrial respiratory chain complex I
GO:0010008	6	GO:0031982	0.68	98	98	endosome membrane	vesicle
GO:0005758	3	GO:0005743	0.738	98	98	mitochondrial intermembrane space	mitochondrial inner membrane
GO:0022627	7	GO:0005840	0.824	72	72	cytosolic small ribosomal subunit	ribosome
GO:0071005	9	GO:0071005	1	47	47	U2-type precatalytic spliceosome	U2-type precatalytic spliceosome
GO:0046540	9	GO:0071005	0.53	43	43	U4/U6 x U5 tri-snRNP complex	U2-type precatalytic spliceosome
GO:0005689	9	GO:0071005	0.69	39	39	U12-type spliceosomal complex	U2-type precatalytic spliceosome
GO:0042788	7	GO:0005840	0.777	34	34	polysomal ribosome	ribosome
GO:0071007	9	GO:0071005	0.847	31	31	U2-type catalytic step 2 spliceosome	U2-type precatalytic spliceosome
GO:0005666	8	GO:0005747	0.474	28	28	RNA polymerase III complex	mitochondrial respiratory chain complex I
GO:0005685	9	GO:0071005	0.516	28	28	U1 snRNP	U2-type precatalytic spliceosome
GO:0005665	8	GO:0005747	0.473	27	27	RNA polymerase II, core complex	mitochondrial respiratory chain complex I
GO:0015935	7	GO:0005840	0.876	27	27	small ribosomal subunit	ribosome
GO:0005761	2	GO:0005730	0.431	26	26	mitochondrial ribosome	nucleolus
GO:0005686	9	GO:0071005	0.511	24	24	U2 snRNP	U2-type precatalytic spliceosome
GO:0032279	5	GO:0014069	0.991	23	23	asymmetric synapse	postsynaptic density
GO:0005736	8	GO:0005747	0.465	21	21	RNA polymerase I complex	mitochondrial respiratory chain complex I
GO:0071011	9	GO:0071005	0.976	20	20	precatalytic spliceosome	U2-type precatalytic spliceosome
GO:0005740	3	GO:0005743	0.938	18	18	mitochondrial envelope	mitochondrial inner membrane
GO:0015934	7	GO:0005840	0.905	18	18	large ribosomal subunit	ribosome
GO:0005774	4	GO:0005789	0.584	17	17	vacuolar membrane	endoplasmic reticulum membrane
GO:0031301	4	GO:0005789	0.626	16	16	integral component of organelle membrane	endoplasmic reticulum membrane
GO:0005687	9	GO:0071005	0.494	14	14	U4 snRNP	U2-type precatalytic spliceosome
GO:0005684	9	GO:0071005	0.93	12	12	U2-type spliceosomal complex	U2-type precatalytic spliceosome
GO:0005744	3	GO:0005743	0.715	12	12	TIM23 mitochondrial import inner membrane translocase complex	mitochondrial inner membrane
GO:0005742	3	GO:0005743	0.635	11	11	mitochondrial outer membrane translocase complex	mitochondrial inner membrane
GO:0030055	5	GO:0014069	0.446	9	9	cell-substrate junction	postsynaptic density
GO:0034774	6	GO:0031982	0.497	9	9	secretory granule lumen	vesicle
GO:0005688	9	GO:0071005	0.478	8	8	U6 snRNP	U2-type precatalytic spliceosome
GO:0097526	9	GO:0071005	0.534	6	6	spliceosomal tri-snRNP complex	U2-type precatalytic spliceosome
GO:0098574	4	GO:0005789	0.429	5	5	cytoplasmic side of lysosomal membrane	endoplasmic reticulum membrane
GO:0030867	4	GO:0005789	0.72	5	5	rough endoplasmic reticulum membrane	endoplasmic reticulum membrane
GO:0031981	2	GO:0005730	0.683	4	4	nuclear lumen	nucleolus
GO:0042583	6	GO:0031982	0.459	3	3	chromaffin granule	vesicle
GO:0045271	8	GO:0005747	0.998	2	2	respiratory chain complex I	mitochondrial respiratory chain complex I
GO:0097525	9	GO:0071005	0.576	1	1	spliceosomal snRNP complex	U2-type precatalytic spliceosome
GO:0019866	3	GO:0005743	0.985	1	1	organelle inner membrane	mitochondrial inner membrane
GO:0060205	6	GO:0031982	0.503	1	1	cytoplasmic vesicle lumen	vesicle
GO:0043232	7	GO:0005840	0.55	0	0	intracellular non-membrane-bounded organelle	ribosome
GO:0031970	3	GO:0005743	0.673	0	0	organelle envelope lumen	mitochondrial inner membrane
GO:0070013	2	GO:0005730	0.663	0	0	intracellular organelle lumen	nucleolus

[truncated: 15 more sheets: Module_3_BP, Module_3_CC, Module_3_KEGG, Module_3_BPred, Module_3_CCred, Module_4_BP, Module_4_CC, Module_4_KEGG, Module_4_BPred, Module_4_CCred, Module_5_BP, Module_5_CC, Module_5_KEGG, Module_5_BPred, Module_5_CCred]
